# Supplementary material for: Specific lncRNA signatures discriminate childhood acute leukaemias: a pilot study
Source: Cancer Cell Int. 2022 Nov 30;22:373. doi: 10.1186/s12935-022-02789-3 (PMC9710039; doi:10.1186/s12935-022-02789-3)
Supplement: Supplementary file 4 — Additional file 4: Dataset S4. B-ALL differential gene expression analysis. [file 12935_2022_2789_MOESM4_ESM.xlsx]

## Sheet: B-ALL_vs_B-NAIVE
ensembl_gene_id	gene_name	baseMean	log2FoldChange	lfcSE	stat	pvalue	padj	B_NAIVE_CB20	B_NAIVE_CB15	B_NAIVE_CB19	B_NAIVE_CB18	B_NAIVE_CB17	B_NAIVE_CB14	B_NAIVE_CB8	B_NAIVE_CB9	B_NAIVE_CB7	B_ALL_GRPM33	B_ALL_PA62	B_ALL_GRPM24	B_ALL_GRPM18	B_ALL_PA69	B_ALL_PA51	B_ALL_GRPM25	B_ALL_GRPM27	B_ALL_PA57	gene_biotype
ENSG00000153292	ADGRF1	19.2165	22.6791	2.96551	7.64762	2.0473e-14	1.06523e-12	0	0	0	0	0	0	0	0	0	29.3759	0	0	0	316.521	0	1041.93	0	0	protein_coding
ENSG00000101197	BIRC7	8.46665	21.5355	2.96688	7.25862	3.91055e-13	1.65642e-11	0	0	0	0	0	0	0	0	0	594.047	0.794225	0	151.605	0	0	0	0	0	protein_coding
ENSG00000122585	NPY	234.608	10.4192	1.62073	6.42871	1.28688e-10	3.55713e-09	0	0	0.889666	0	0	0.782247	1.87678	0	0	184.416	1215.16	568.684	0	0	1058.13	0	780.359	412.643	protein_coding
ENSG00000170549	IRX1	117.187	10.4133	1.68866	6.16659	6.97792e-10	1.66551e-08	0	0	0	0	0	0	0	0	0	523.871	523.394	184.732	73.7259	0	21.3332	0	750.872	31.4394	protein_coding
ENSG00000107447	DNTT	1048.14	10.0663	0.61192	16.4504	8.32935e-61	3.13121e-57	2.18142	0	0	1.02371	5.17977	6.25798	1.87678	0	0	3082.03	1088.88	3340.56	969.859	3882.99	715.375	3769.97	510.867	1489.44	protein_coding
ENSG00000251381	LINC00958	82.1774	9.90149	1.20287	8.23158	1.84757e-16	1.41025e-14	0	0	0	0	0	0	0	0	0	656.063	105.632	165.715	195.218	86.7879	7.11108	181.417	0.685728	80.5635	lncRNA
ENSG00000188643	S100A16	188.144	9.84238	1.07091	9.19068	3.90383e-20	5.06051e-18	0	2.78069	0	0	0.517977	0	0	0	0	4.07999	683.828	648.372	50.8813	139.882	881.774	468.579	429.266	76.6336	protein_coding
ENSG00000187773	FAM69C	97.4639	9.82604	1.52487	6.44385	1.16477e-10	3.24346e-09	0	0	0.889666	0	0	0	0	0	0	7.34399	19.0614	800.504	467.277	4.08414	0	2.91043	387.436	64.8438	protein_coding
ENSG00000015413	DPEP1	71.6885	9.70425	1.50087	6.46574	1.00806e-10	2.84929e-09	0	0	0	0	0	0	0	0	0	548.351	38.917	5.43329	377.975	35.7362	2.84443	220.222	0	60.9139	protein_coding
ENSG00000037280	FLT4	69.3095	9.6558	0.896409	10.7716	4.68531e-27	1.35487e-24	0	0	0	0	0	0	0	0	0	127.296	76.2456	189.259	2.07679	117.419	216.177	74.7009	328.464	115.933	protein_coding
ENSG00000152192	POU4F1	82.532	9.58621	1.28859	7.4393	1.01224e-13	4.71238e-12	0	0	0	0	0	0.782247	0	0	0	181.152	210.47	313.319	35.3054	45.9466	9.95551	623.801	0	64.8438	protein_coding
ENSG00000092421	SEMA6A	242.373	8.92286	1.3405	6.65634	2.8073e-11	8.59744e-10	0	0	0.889666	0	0	0	7.50711	0	1.84476	177.888	461.445	2.71664	1.03839	100.061	2541.5	735.368	8.22874	324.219	protein_coding
ENSG00000125845	BMP2	50.2563	8.866	1.18438	7.48578	7.11209e-14	3.43873e-12	0	0	0	0	0	0	1.87678	0	0	93.0238	134.224	21.7331	0	8.16828	160.71	63.0592	87.7732	334.044	protein_coding
ENSG00000223806	LINC00114	39.884	8.85765	1.18665	7.46444	8.36558e-14	3.9808e-12	0	0	0	0	0	0	0	0	0	81.5998	218.412	129.493	78.9179	19.3997	1.42222	28.1341	1.37146	159.162	lncRNA
ENSG00000148483	TMEM236	43.8867	8.67434	1.21969	7.11194	1.14425e-12	4.44603e-11	0	0.926896	0	0	0	0	0	0	0	181.968	58.7726	181.11	17.6527	37.7783	0	245.446	3.42864	62.8789	protein_coding
ENSG00000176435	CLEC14A	34.7731	8.65939	1.19819	7.22707	4.9351e-13	2.06137e-11	0	0	0	0	0	0	0	0	0	69.3599	106.426	22.6387	165.105	9.18931	25.5999	103.805	0	123.793	protein_coding
ENSG00000170011	MYRIP	31.8677	8.53426	2.02374	4.21706	2.47503e-05	0.000210504	0	0	0	0	0	0	0	0	0	2.448	15.8845	7.24438	353.054	0	0	0	112.459	82.5285	protein_coding
ENSG00000276043	UHRF1	39.3588	8.51935	0.908255	9.37991	6.6027e-21	9.3665e-19	0	0	0	0	0	0	0	0	0.922379	288.863	24.621	117.721	123.569	12.2524	21.3332	53.3578	36.3436	29.4745	protein_coding
ENSG00000124839	RAB17	31.3561	8.50865	1.30277	6.53118	6.52522e-11	1.8942e-09	0	0	0	0	0	0	0	0	0	1.632	30.1805	5.43329	29.075	2.04207	389.687	17.4626	39.7722	49.1241	protein_coding
ENSG00000204960	BLACE	28.7216	8.38514	1.32684	6.31961	2.6222e-10	6.8218e-09	0	0	0	0	0	0	0	0	0	217.872	73.0687	99.6102	1.03839	13.2735	0	14.5521	28.8006	68.7738	lncRNA
ENSG00000046653	GPM6B	28.5746	8.37721	1.745	4.80071	1.58106e-06	1.88089e-05	0	0	0	0	0	0	0	0	0	0	65.9207	161.187	248.176	0	2.84443	1.94028	4.8001	29.4745	protein_coding
ENSG00000227706	AL713998.1	54.6541	8.31508	1.38261	6.01403	1.80969e-09	3.9668e-08	0	0	0	0	0	0	3.75356	0	0.922379	13.872	58.7726	391.197	24.9214	2.04207	146.488	7.76114	0	334.044	lncRNA
ENSG00000218672	AC008060.1	26.9112	8.29131	1.56997	5.28118	1.28355e-07	1.97996e-06	0	0	0	0	0	0	0	0	0	158.304	49.2419	133.115	0	0	1.42222	15.5223	81.6016	45.1942	lncRNA
ENSG00000166394	CYB5R2	49.762	8.17857	1.62252	5.04066	4.63925e-07	6.27907e-06	2.18142	0	0.889666	0	0	0	0	0	0	441.455	48.4477	274.381	0	0	19.911	0.970142	1.37146	106.108	protein_coding
ENSG00000267206	LCN6	45.6931	8.11947	0.901064	9.01098	2.0423e-19	2.34427e-17	0	0	0	1.02371	1.03595	0	0	0	0	25.2959	233.502	95.988	57.1116	14.2945	48.3554	18.4327	42.5151	284.92	protein_coding
ENSG00000118523	CTGF	59.4641	8.11234	0.989039	8.20224	2.35953e-16	1.78293e-14	0	1.85379	0.889666	0	0	0	1.87678	0	0	394.127	38.1228	90.5548	8.30715	81.6828	5.68887	313.356	6.17155	127.723	protein_coding
ENSG00000166349	RAG1	34.3648	8.00735	0.982244	8.1521	3.57667e-16	2.61959e-14	0	0	0	0	1.03595	0	0	0	0	370.463	21.4441	11.7721	9.34554	56.1569	48.3554	59.1787	19.2004	21.6146	protein_coding
ENSG00000168671	UGT3A2	19.8344	7.85324	1.08056	7.26774	3.65562e-13	1.57959e-11	0	0	0	0	0	0	0	0	0	26.9279	100.072	151.226	6.23036	16.3366	27.0221	21.3431	0	7.85986	protein_coding
ENSG00000228401	AL590226.1	46.4628	7.7949	1.67541	4.65252	3.27903e-06	3.58334e-05	0	0	0	0	2.07191	0	1.87678	0	0	595.679	0.794225	7.24438	83.0715	0	68.2664	76.6412	0.685728	0	lncRNA
ENSG00000156298	TSPAN7	23.5915	7.78134	0.945287	8.23173	1.84529e-16	1.41025e-14	0	0	0	0	0.517977	0	0	0	0	153.408	23.8267	37.1275	34.267	20.4207	0	90.2232	29.4863	35.3694	protein_coding
ENSG00000074211	PPP2R2C	23.6323	7.7782	1.10385	7.04642	1.83578e-12	6.8584e-11	0	0.926896	0	0	0	0	0	0	0	211.344	5.55957	68.8216	18.6911	1.02103	9.95551	6.79099	2.05718	100.213	protein_coding
ENSG00000153707	PTPRD	64.3637	7.77571	1.65754	4.69111	2.71726e-06	3.02438e-05	0	2.78069	0	0	1.03595	0	1.87678	0	0	23.664	0	3.62219	560.732	60.241	162.133	342.46	0	0	protein_coding
ENSG00000133454	MYO18B	18.3847	7.74099	2.17206	3.56389	0.000365393	0.00220217	0	0	0	0	0	0	0	0	0	53.0399	46.8593	56.1439	119.415	0	55.4664	0	0	0	protein_coding
ENSG00000110076	NRXN2	52.8659	7.73193	0.955009	8.09618	5.67128e-16	3.96646e-14	1.09071	0	0	0	0.517977	0.782247	0	1.68399	0	4.07999	38.917	33.5053	331.247	243.006	1.42222	178.506	63.7727	53.054	protein_coding
ENSG00000153404	PLEKHG4B	28.3165	7.71774	1.00924	7.64711	2.05539e-14	1.06576e-12	0	0	0	0	0	0.782247	0	0.841994	0	254.591	47.6535	41.6552	52.9581	0	48.3554	23.2834	6.17155	33.4044	protein_coding
ENSG00000260314	MRC1	54.2648	7.70269	0.887479	8.67928	3.9827e-18	3.62957e-16	0	0	0	0	0	0	1.87678	2.52598	0.922379	17.952	11.9134	212.804	260.637	81.6828	8.5333	159.103	161.832	56.984	protein_coding
ENSG00000134531	EMP1	42.8628	7.64882	0.906631	8.43653	3.26888e-17	2.65788e-15	0	0.926896	0	2.04742	0	0	0	0	0.922379	2.448	58.7726	51.6162	22.8447	190.933	17.0666	79.5517	187.204	157.197	protein_coding
ENSG00000214357	NEURL1B	59.8859	7.64836	0.949704	8.05342	8.05146e-16	5.47827e-14	0	0	0.889666	2.04742	1.03595	0	1.87678	0	0	339.455	71.4802	37.1275	126.684	148.05	1.42222	331.789	8.22874	7.85986	protein_coding
ENSG00000237819	AC002454.1	31.9597	7.61833	1.05841	7.19789	6.1151e-13	2.49195e-11	0	0	0	0	1.03595	0	0	0	0.922379	7.34399	45.2708	8.14993	34.267	176.639	1.42222	248.356	2.74291	49.1241	lncRNA
ENSG00000137225	CAPN11	25.5816	7.57162	1.04007	7.2799	3.34072e-13	1.45186e-11	0	0	0	0	0.517977	0	1.87678	0	0	4.89599	1.58845	76.066	47.7661	101.082	4.26665	194.028	4.8001	23.5796	protein_coding
ENSG00000164684	ZNF704	28.0534	7.38666	0.875626	8.43586	3.28766e-17	2.65788e-15	0	0.926896	0	0	0.517977	0	1.87678	0	0	42.4319	82.5994	41.6552	69.5723	8.16828	112.355	50.4474	2.05718	92.3533	protein_coding
ENSG00000142945	KIF2C	13.2773	7.27	0.93694	7.7593	8.54005e-15	4.75617e-13	0	0	0	0	0	0	0	0	0	54.6719	25.4152	17.2054	5.19197	10.2103	93.8663	10.6716	17.8289	3.92993	protein_coding
ENSG00000143344	RGL1	39.2431	7.24091	0.755858	9.57972	9.73085e-22	1.59046e-19	2.18142	0	0	0	0	0	0	1.68399	0.922379	102.816	185.054	85.1215	45.6893	55.1359	14.2222	70.8204	42.5151	100.213	protein_coding
ENSG00000251322	SHANK3	12.93	7.22434	0.893592	8.0846	6.23668e-16	4.28223e-14	0	0	0	0	0	0	0	0	0	48.9599	7.94225	11.7721	33.2286	10.2103	58.3109	28.1341	2.74291	31.4394	protein_coding
ENSG00000169418	NPR1	15.8249	7.20039	0.942501	7.63966	2.17802e-14	1.12546e-12	0	0.926896	0	0	0	0	0	0	0	37.5359	14.296	46.1829	76.8411	3.0631	8.5333	1.94028	56.2297	39.2993	protein_coding
ENSG00000170893	TRH	15.7561	7.1899	1.00932	7.12354	1.0519e-12	4.1407e-11	0	0	0	0	0	0	1.87678	0	0	12.24	40.5055	42.5607	2.07679	106.188	29.8665	41.7161	0.685728	5.89489	protein_coding
ENSG00000170561	IRX2	12.0584	7.13377	2.35769	3.02575	0.00248018	0.0110765	0	0	0	0	0	0	0	0	0	32.6399	162.816	0	1.03839	2.04207	0	0	18.5147	0	protein_coding
ENSG00000135333	EPHA7	11.9737	7.11917	1.08305	6.57325	4.923e-11	1.44867e-09	0	0	0	0	0	0	0	0	0	58.7519	11.9134	28.9775	41.5357	2.04207	1.42222	0	17.8289	53.054	protein_coding
ENSG00000156535	CD109	18.5656	7.09639	0.910392	7.79487	6.44729e-15	3.71448e-13	0	0.926896	0.889666	0	0	0	0	0	0	26.9279	76.2456	28.9775	5.19197	17.3576	79.6441	25.2237	2.05718	70.7387	protein_coding
ENSG00000189292	FAM150B	65.8177	7.04883	1.75877	4.00782	6.12821e-05	0.000468263	0	0	0	0	0.517977	0	9.38389	0	0	79.9678	115.957	0	10.3839	1.02103	830.574	127.089	0	9.82482	protein_coding
ENSG00000145358	DDIT4L	22.6319	7.03333	1.62218	4.33573	1.4528e-05	0.00013272	0	1.85379	0	1.02371	0	0	0	0	0	4.07999	35.7401	121.343	0	2.04207	2.84443	0	0.685728	237.761	protein_coding
ENSG00000167210	LOXHD1	11.0767	7.00861	1.96636	3.56425	0.000364897	0.00220006	0	0	0	0	0	0	0	0	0	41.6159	0	6.33883	103.839	0	1.42222	0.970142	0	45.1942	protein_coding
ENSG00000021645	NRXN3	13.7869	7.00142	1.40788	4.97303	6.59147e-07	8.59635e-06	0	0	0.889666	0	0	0	0	0	0	38.3519	7.94225	69.7272	0	24.5048	2.84443	96.0441	0	7.85986	protein_coding
ENSG00000120833	SOCS2	208.281	6.99629	0.445506	15.7041	1.41682e-55	4.26093e-52	7.63496	2.78069	1.77933	0	6.21573	0.782247	7.50711	1.68399	1.84476	455.327	292.275	217.331	123.569	460.487	463.643	717.905	363.436	624.859	protein_coding
ENSG00000122025	FLT3	110.655	6.81557	0.72541	9.39547	5.69625e-21	8.31598e-19	3.27212	4.63448	7.11733	0	0.517977	0	0	0	1.84476	92.2078	142.96	298.831	735.182	141.924	4.26665	129.999	175.546	253.48	protein_coding
ENSG00000157554	ERG	165.642	6.78582	0.684693	9.91076	3.73809e-23	7.5959e-21	0	0	0.889666	2.04742	4.66179	0	18.7678	0.841994	2.76714	717.263	172.347	665.577	371.745	199.102	98.1329	366.714	24.6862	336.009	protein_coding
ENSG00000176890	TYMS	85.5951	6.77831	0.533994	12.6936	6.41738e-37	5.07885e-34	0	0	0	1.02371	4.66179	1.56449	1.87678	1.68399	1.84476	305.999	215.235	207.37	50.8813	207.27	75.3775	164.924	212.576	88.4234	protein_coding
ENSG00000158497	HMHB1	8.99931	6.71549	0.823772	8.15212	3.57595e-16	2.61959e-14	0	0	0	0	0	0	0	0	0	26.9279	13.5018	37.1275	24.9214	10.2103	4.26665	18.4327	8.91446	17.6847	protein_coding
ENSG00000257654	AC125603.1	8.6332	6.64046	1.25739	5.28114	1.28381e-07	1.97996e-06	0	0	0	0	0	0	0	0	0	0	17.4729	50.7107	3.11518	6.12621	0	0.970142	8.22874	68.7738	lncRNA
ENSG00000152953	STK32B	83.0778	6.63348	0.615386	10.7794	4.30793e-27	1.28888e-24	0	0	0	0	0	1.56449	1.87678	1.68399	10.1462	430.031	135.018	179.298	94.4938	134.777	95.2885	161.044	87.0875	163.092	protein_coding
ENSG00000107821	KAZALD1	10.7298	6.62976	1.03097	6.43059	1.2711e-10	3.52648e-09	0	0	0	0	0	0.782247	0	0	0	0	12.7076	35.3164	2.07679	4.08414	71.1108	22.3133	19.2004	25.5445	protein_coding
ENSG00000196739	COL27A1	36.9452	6.6146	1.4412	4.58966	4.43964e-06	4.67172e-05	0	1.85379	0.889666	3.07113	0	0.782247	0	0	0	35.9039	50.0362	172.054	0	0	12.7999	0	55.544	332.079	protein_coding
ENSG00000183463	URAD	10.1487	6.56238	1.03417	6.34555	2.21633e-10	5.88814e-09	0	0	0	0	0.517977	0	0	0	0	2.448	17.4729	53.4273	65.4188	19.3997	0	3.88057	10.2859	9.82482	protein_coding
ENSG00000160678	S100A1	16.0521	6.55073	1.0425	6.28367	3.30669e-10	8.35674e-09	0	0	0	1.02371	0	0	1.87678	0	0.922379	0	41.2997	157.565	9.34554	31.6521	5.68887	24.2536	5.48582	9.82482	protein_coding
ENSG00000005108	THSD7A	10.0001	6.54094	1.23294	5.30516	1.12573e-07	1.77437e-06	0	0	0.889666	0	0	0	0	0	0	37.5359	11.9134	67.0105	0	1.02103	0	0.970142	52.8011	7.85986	protein_coding
ENSG00000147852	VLDLR	8.00424	6.5328	1.23957	5.27022	1.36261e-07	2.08227e-06	0	0	0	0	0	0	0	0	0	2.448	2.38267	21.7331	0	0	5.68887	59.1787	5.48582	47.1591	protein_coding
ENSG00000138771	SHROOM3	7.94683	6.53034	1.62742	4.0127	6.00273e-05	0.000460526	0	0	0	0	0	0	0	0	0	35.0879	10.3249	19.922	47.7661	0	14.2222	0	0	15.7197	protein_coding
ENSG00000064300	NGFR	20.0073	6.52817	1.02078	6.39529	1.60239e-10	4.35718e-09	0	2.78069	0.889666	0	0	0	0	0	0	18.768	10.3249	15.3943	95.5322	2.04207	2.84443	5.82085	133.031	72.7037	protein_coding
ENSG00000128322	IGLL1	224.125	6.44202	0.568003	11.3415	8.1703e-30	3.32046e-27	3.27212	5.56137	4.44833	1.02371	6.7337	10.9515	13.1374	0	1.84476	1122	498.773	295.209	785.025	253.217	75.3775	703.353	179.661	74.6687	protein_coding
ENSG00000172247	C1QTNF4	13.8218	6.43973	1.17205	5.49443	3.91966e-08	6.65988e-07	0	0	0	0	1.55393	0	0	0	0	14.688	15.0903	5.43329	3.11518	107.209	0	91.1934	0.685728	9.82482	protein_coding
ENSG00000157927	RADIL	9.28979	6.43467	1.0337	6.22489	4.81906e-10	1.18406e-08	0	0	0	0	0.517977	0	0	0	0	0	16.6787	29.8831	1.03839	50.0307	17.0666	32.9848	15.086	3.92993	protein_coding
ENSG00000113231	PDE8B	9.15599	6.40684	0.81453	7.86569	3.67079e-15	2.16461e-13	1.09071	0	0	0	0	0	0	0	0	10.608	35.7401	15.3943	14.5375	4.08414	12.7999	15.5223	29.4863	25.5445	protein_coding
ENSG00000173805	HAP1	11.3482	6.39181	1.22303	5.22622	1.7301e-07	2.58091e-06	0	0	0	0	0	0	0	1.68399	0	48.9599	6.3538	0.905548	116.3	0	2.84443	1.94028	23.3148	1.96496	protein_coding
ENSG00000253983	AC087627.1	7.1783	6.38768	1.14176	5.59461	2.21123e-08	3.96105e-07	0	0	0	0	0	0	0	0	0	33.4559	8.73647	36.2219	0	7.14724	5.68887	28.1341	0	9.82482	lncRNA
ENSG00000162676	GFI1	29.3685	6.37963	0.821688	7.76405	8.22582e-15	4.65006e-13	0	0.926896	0	0	0	0.782247	0	4.20997	0	137.088	40.5055	21.7331	65.4188	44.9255	22.7555	168.805	11.6574	9.82482	protein_coding
ENSG00000117245	KIF17	9.01394	6.37693	1.62165	3.93238	8.4108e-05	0.000618753	0	0	0	0	0	0	1.87678	0	0	2.448	3.1769	8.14993	0	109.251	0	17.4626	19.8861	0	protein_coding
ENSG00000172995	ARPP21	100.753	6.37438	0.976891	6.52517	6.79257e-11	1.96423e-09	1.09071	0	3.55866	1.02371	0.517977	3.91124	1.87678	6.73595	2.76714	171.36	495.596	317.847	0	29.61	79.6441	25.2237	2.74291	670.053	protein_coding
ENSG00000169575	VPREB1	263.859	6.37312	0.51424	12.3933	2.84176e-35	1.70926e-32	0	4.63448	0.889666	6.14226	7.25168	21.1207	9.38389	4.20997	2.76714	207.264	983.25	889.248	125.646	507.454	169.244	480.22	580.126	750.616	protein_coding
ENSG00000178217	SH2D4B	21.0081	6.35499	0.973416	6.52855	6.64101e-11	1.9241e-09	0	0.926896	1.77933	0	0.517977	0	1.87678	0	0	117.504	38.1228	40.7496	58.15	0	49.7776	0.970142	6.85728	60.9139	protein_coding
ENSG00000183145	RIPPLY3	7.03575	6.35468	1.78545	3.55915	0.000372054	0.00223336	0	0	0	0	0	0	0	0	0	0.815998	57.9784	28.072	0	10.2103	0	0	2.05718	27.5095	protein_coding
ENSG00000152104	PTPN14	42.6976	6.34987	1.21569	5.22325	1.7581e-07	2.61748e-06	2.18142	1.85379	0	1.02371	3.10786	0.782247	0	0	0	0	7.14802	0	41.5357	173.576	41.2443	250.297	237.948	7.85986	protein_coding
ENSG00000196139	AKR1C3	17.2782	6.33503	1.10417	5.73735	9.61687e-09	1.8445e-07	0	0	0	1.02371	0	1.56449	0	0	0.922379	18.768	0	14.4888	33.2286	33.6941	5.68887	191.118	0.685728	9.82482	protein_coding
ENSG00000099998	GGT5	10.6909	6.30337	1.61544	3.90196	9.5416e-05	0.000689131	0	0	0	0	0	1.56449	0	0	0	66.0959	0	1.8111	0	14.2945	0	23.2834	63.7727	21.6146	protein_coding
ENSG00000099250	NRP1	10.5758	6.29639	1.02428	6.14711	7.8908e-10	1.87151e-08	0	0	0	0	0	1.56449	0	0	0	13.056	7.94225	1.8111	3.11518	35.7362	1.42222	39.7758	76.1158	9.82482	protein_coding
ENSG00000118276	B4GALT6	13.0879	6.29433	0.961606	6.54564	5.92414e-11	1.7331e-09	0	0.926896	0	0	0.517977	0	0	0	0.922379	78.3358	10.3249	18.111	42.5741	41.8624	1.42222	30.0744	0.685728	9.82482	protein_coding
ENSG00000203797	DDO	6.63759	6.27246	1.74249	3.59972	0.000318565	0.0019592	0	0	0	0	0	0	0	0	0	0	0	8.14993	6.23036	66.3673	0	27.164	9.60019	1.96496	protein_coding
ENSG00000175874	CREG2	8.37115	6.26745	1.20861	5.18567	2.15239e-07	3.14227e-06	1.09071	0	0	0	0	0	0	0	0	4.07999	29.3863	34.4108	1.03839	29.61	0	1.94028	0	49.1241	protein_coding
ENSG00000108551	RASD1	51.8473	6.26115	0.706452	8.8628	7.80275e-19	7.98163e-17	1.09071	2.78069	0.889666	0	0	0	0	3.36798	3.68952	107.712	57.1842	40.7496	67.4956	19.3997	224.71	74.7009	15.086	314.394	protein_coding
ENSG00000175183	CSRP2	20.3502	6.23363	0.876394	7.11281	1.13701e-12	4.42933e-11	1.09071	0	0.889666	0	0	0	1.87678	0	1.84476	39.1679	17.4729	67.0105	6.23036	80.6617	12.7999	53.3578	1.37146	82.5285	protein_coding
ENSG00000171848	RRM2	35.5068	6.22625	0.678011	9.18312	4.18793e-20	5.33677e-18	0	0	1.77933	1.02371	1.55393	1.56449	0	1.68399	0	91.3918	164.405	76.066	10.3839	59.22	39.8221	84.4024	96.0019	9.82482	protein_coding
ENSG00000198929	NOS1AP	12.9485	6.21495	1.11386	5.57965	2.41e-08	4.26256e-07	2.18142	0	0	0	0	0	1.87678	0	0	3.26399	40.5055	28.9775	5.19197	4.08414	36.9776	1.94028	0	108.073	protein_coding
ENSG00000151967	SCHIP1	7.98682	6.20848	0.798951	7.77079	7.79952e-15	4.44808e-13	0	0	0.889666	0	0	0	0	0	0	13.872	7.94225	18.111	26.9982	11.2314	4.26665	15.5223	23.3148	21.6146	protein_coding
ENSG00000259779	LINC01922	6.27668	6.19154	1.30212	4.75495	1.98494e-06	2.29597e-05	0	0	0	0	0	0	0	0	0	17.952	10.3249	53.4273	13.4991	0	0	0	2.05718	15.7197	lncRNA
ENSG00000183166	CALN1	14.3558	6.18481	1.42009	4.35522	1.32933e-05	0.000123629	0	0	0	0	1.03595	0	3.75356	0	0	26.9279	0	1.8111	147.452	7.14724	9.95551	46.5668	0	13.7548	protein_coding
ENSG00000174059	CD34	136.727	6.17355	0.646886	9.54348	1.38121e-21	2.18624e-19	0	2.78069	1.77933	1.02371	2.58989	0	24.3981	3.36798	1.84476	125.664	110.397	498.051	553.464	300.184	482.131	242.536	48.001	62.8789	protein_coding
ENSG00000102935	ZNF423	16.7647	6.17176	0.960125	6.42808	1.29223e-10	3.56536e-09	0	0	0	0	1.55393	0	0	1.68399	0	110.16	34.1517	21.7331	44.6509	7.14724	29.8665	21.3431	0	29.4745	protein_coding
ENSG00000165996	HACD1	33.2788	6.1552	0.628754	9.78951	1.24894e-22	2.37725e-20	0	0.926896	2.669	0	2.58989	0.782247	0	0	0	71.8079	53.2131	97.7991	113.185	36.7572	14.2222	97.9844	36.3436	70.7387	protein_coding
ENSG00000245694	CRNDE	12.1395	6.15045	1.02785	5.98382	2.1796e-09	4.65548e-08	0	0	0.889666	2.04742	0	0	0	0	0	90.5758	31.769	13.5832	44.6509	2.04207	11.3777	0	13.7146	7.85986	lncRNA
ENSG00000101188	NTSR1	5.69925	6.05665	1.28495	4.71353	2.43464e-06	2.73615e-05	0	0	0	0	0	0	0	0	0	0	13.5018	2.71664	0	18.3786	0	32.0147	28.1148	7.85986	protein_coding
ENSG00000137809	ITGA11	5.68878	6.05435	1.07996	5.6061	2.06934e-08	3.73101e-07	0	0	0	0	0	0	0	0	0	0	7.94225	53.4273	2.07679	5.10517	7.11108	12.6118	8.22874	5.89489	protein_coding
ENSG00000139354	GAS2L3	5.68682	6.04723	1.0502	5.75819	8.50208e-09	1.64538e-07	0	0	0	0	0	0	0	0	0	0.815998	46.8593	8.14993	1.03839	9.18931	2.84443	9.70142	4.11437	19.6496	protein_coding
ENSG00000225978	HAR1A	7.17512	6.04408	1.12083	5.3925	6.9484e-08	1.12711e-06	0	0	0	0	0	0	1.87678	0	0	29.3759	16.6787	41.6552	9.34554	0	0	0.970142	9.60019	19.6496	lncRNA
ENSG00000105737	GRIK5	16.9522	6.04299	0.900676	6.7094	1.95432e-11	6.1998e-10	0	1.85379	0.889666	1.02371	0.517977	0	0	0	0	83.2318	46.8593	38.9385	57.1116	3.0631	14.2222	2.91043	3.42864	51.0891	protein_coding
ENSG00000065054	SLC9A3R2	41.8937	6.03533	0.749511	8.05236	8.12107e-16	5.50074e-14	0	1.85379	0	2.04742	2.07191	0	1.87678	1.68399	1.84476	12.24	14.296	119.532	35.3054	92.9142	4.26665	68.8801	328.464	66.8088	protein_coding
ENSG00000111206	FOXM1	22.5709	6.02822	0.686733	8.7781	1.66258e-18	1.59237e-16	0	0	0	1.02371	1.03595	1.56449	1.87678	0	0.922379	60.3839	91.3358	58.8606	14.5375	34.7152	29.8665	29.1043	69.2585	11.7898	protein_coding
ENSG00000242516	LINC00960	5.6263	6.01845	1.16507	5.16575	2.3948e-07	3.43613e-06	0	0	0	0	0	0	0	0	0	7.34399	14.296	10.8666	2.07679	0	41.2443	7.76114	0	17.6847	lncRNA
ENSG00000117525	F3	5.53384	6.00925	1.78854	3.35986	0.000779816	0.00415524	0	0	0	0	0	0	0	0	0	0	11.9134	0	1.03839	0	19.911	57.2384	7.54301	1.96496	protein_coding
ENSG00000001617	SEMA3F	6.8094	5.96939	1.12961	5.28447	1.26067e-07	1.95228e-06	0	0	0	0	0.517977	0	0	0	0	26.1119	3.97112	12.6777	22.8447	0	25.5999	0	1.37146	29.4745	protein_coding
ENSG00000074660	SCARF1	10.178	5.94983	0.854681	6.96147	3.36747e-12	1.20277e-10	0	0	0	0	1.03595	0	0	0.841994	0	75.8878	15.0903	19.0165	12.4607	15.3155	8.5333	9.70142	9.60019	15.7197	protein_coding
ENSG00000116991	SIPA1L2	66.826	5.92871	0.738001	8.03347	9.47528e-16	6.30442e-14	2.18142	0	0	1.02371	1.55393	0	5.63033	0.841994	9.22379	260.303	57.1842	220.954	190.026	50.0307	15.6444	44.6265	9.60019	334.044	protein_coding
ENSG00000171303	KCNK3	5.18582	5.91649	1.40694	4.20522	2.60831e-05	0.000220716	0	0	0	0	0	0	0	0	0	40.7999	5.55957	0	19.7295	0	25.5999	0.970142	0.685728	0	protein_coding
ENSG00000260188	AC002464.1	9.91686	5.91478	0.825784	7.16262	7.91479e-13	3.18221e-11	0	0	0	0	1.55393	0	0	0	0	30.1919	17.4729	26.2609	12.4607	20.4207	12.7999	32.9848	2.74291	21.6146	lncRNA
ENSG00000163453	IGFBP7	36.0251	5.89876	0.789444	7.47204	7.89634e-14	3.78144e-12	1.09071	0	1.77933	3.07113	1.03595	0	0	1.68399	1.84476	15.504	84.982	72.4438	43.6125	141.924	0	234.774	32.9149	11.7898	protein_coding
ENSG00000165891	E2F7	5.05555	5.88917	1.01913	5.77861	7.53188e-09	1.47662e-07	0	0	0	0	0	0	0	0	0	2.448	46.065	5.43329	1.03839	4.08414	8.5333	3.88057	11.6574	7.85986	protein_coding
ENSG00000182534	MXRA7	23.8717	5.87644	0.789052	7.44747	9.515e-14	4.44338e-12	3.27212	0.926896	0	0	1.03595	0	0	0	1.84476	1.632	45.2708	17.2054	41.5357	26.5469	133.688	13.582	66.5156	76.6336	protein_coding
ENSG00000143369	ECM1	29.4109	5.85558	0.890468	6.57584	4.83777e-11	1.42638e-09	0	3.70758	2.669	0	0	2.34674	0	0	0	20.4	117.545	63.3883	24.9214	21.4417	0	179.476	10.9716	82.5285	protein_coding
ENSG00000229140	CCDC26	4.98928	5.85164	1.2288	4.76206	1.91629e-06	2.22683e-05	0	0	0	0	0	0	0	0	0	0	7.94225	39.8441	6.23036	0	1.42222	8.73128	2.05718	23.5796	lncRNA
ENSG00000114805	PLCH1	9.72202	5.85158	1.11616	5.24258	1.58343e-07	2.37863e-06	2.18142	0	0	0	0.517977	0	0	0	0	22.848	24.621	55.2384	0	1.02103	0	14.5521	6.85728	47.1591	protein_coding
ENSG00000127564	PKMYT1	42.759	5.84987	0.542758	10.778	4.37142e-27	1.28888e-24	0	1.85379	0	0	3.62584	1.56449	0	2.52598	1.84476	139.536	86.5705	142.171	25.9598	64.3252	71.1108	58.2085	133.031	37.3343	protein_coding
ENSG00000182175	RGMA	7.82262	5.84556	1.59553	3.66371	0.000248586	0.00158524	0	0	0.889666	0	0	0	0	0	0.922379	301.103	4.76535	5.43329	107.993	0	2.84443	0	17.1432	0	protein_coding
ENSG00000147100	SLC16A2	4.9331	5.84155	1.95445	2.98885	0.00280032	0.0123052	0	0	0	0	0	0	0	0	0	12.24	18.2672	29.8831	0	0	0	6.79099	0	21.6146	protein_coding
ENSG00000050767	COL23A1	9.1054	5.81989	1.87561	3.10293	0.00191612	0.00889807	0	0	0.889666	0	1.03595	0	0	0	0	0.815998	0	0.905548	0	86.7879	0	61.119	12.3431	0	protein_coding
ENSG00000007062	PROM1	33.2032	5.81677	1.10768	5.25131	1.51021e-07	2.27546e-06	0	0	2.669	0	3.10786	0	1.87678	1.68399	0.922379	5.71199	10.3249	112.288	159.913	107.209	0	179.476	0.685728	11.7898	protein_coding
ENSG00000165757	KIAA1462	7.63126	5.81275	0.888108	6.54509	5.94602e-11	1.73384e-09	1.09071	0	0.889666	0	0	0	0	0	0	1.632	10.3249	19.922	6.23036	8.16828	7.11108	16.4924	43.8866	21.6146	protein_coding
ENSG00000104970	KIR3DX1	4.78318	5.7994	2.05853	2.81726	0.00484355	0.0193755	0	0	0	0	0	0	0	0	0	0	4.76535	0	0	4.08414	11.3777	0	52.1153	13.7548	transcribed_unprocessed_pseudogene
ENSG00000170382	LRRN2	9.0393	5.7958	1.22719	4.72282	2.32602e-06	2.62191e-05	0	0	0	0	1.03595	0	0	0.841994	0	40.7999	2.38267	0.905548	79.9563	17.3576	0	17.4626	0	1.96496	protein_coding
ENSG00000101638	ST8SIA5	4.7832	5.79125	1.35161	4.2847	1.82986e-05	0.000162047	0	0	0	0	0	0	0	0	0	0	31.769	4.52774	6.23036	0	28.4443	0	1.37146	13.7548	protein_coding
ENSG00000004809	SLC22A16	4.71611	5.78796	1.04427	5.54258	2.98052e-08	5.19328e-07	0	0	0	0	0	0	0	0	0	22.848	7.14802	16.2999	15.5759	4.08414	1.42222	13.582	0	3.92993	protein_coding
ENSG00000146670	CDCA5	14.0117	5.77787	0.769223	7.51131	5.85367e-14	2.85784e-12	0	0	0	0	0	3.12899	0	0	0.922379	38.3519	41.2997	34.4108	7.26875	17.3576	51.1998	16.4924	26.0577	15.7197	protein_coding
ENSG00000118513	MYB	445.611	5.77472	0.394853	14.625	1.94604e-48	4.18038e-45	5.45354	10.1959	8.89666	10.2371	18.1292	17.9917	54.4266	16.8399	6.45665	1222.37	1196.1	1017.84	812.023	931.184	300.088	929.396	280.463	1182.91	protein_coding
ENSG00000197046	SIGLEC15	10.5084	5.77069	1.02634	5.62258	1.88124e-08	3.41233e-07	1.09071	0	0	0	1.55393	0	0	0	0	0.815998	14.296	23.5442	12.4607	10.2103	2.84443	4.85071	107.659	9.82482	protein_coding
ENSG00000161544	CYGB	314.078	5.76907	0.943185	6.11658	9.56026e-10	2.23226e-08	4.36283	16.6841	4.44833	4.09484	1.55393	0	52.5498	3.36798	16.6028	500.207	405.055	6.33883	393.551	9.18931	3175.81	94.1038	702.186	263.305	protein_coding
ENSG00000244405	ETV5	27.7361	5.76114	0.846125	6.80885	9.83818e-12	3.23713e-10	0	0.926896	1.77933	0	0.517977	0.782247	5.63033	0.841994	0	9.79198	27.0036	5.43329	22.8447	3.0631	261.688	20.373	52.1153	86.4584	protein_coding
ENSG00000124140	SLC12A5	7.22923	5.74594	0.827249	6.94584	3.76212e-12	1.32175e-10	1.09071	0	0	0	0.517977	0	0	0	0	26.9279	8.73647	8.14993	11.4223	3.0631	11.3777	27.164	19.8861	11.7898	protein_coding
ENSG00000143479	DYRK3	7.28167	5.74017	0.885794	6.48026	9.15669e-11	2.59791e-09	0	1.85379	0	0	0	0	0	0	0	35.9039	9.5307	17.2054	14.5375	12.2524	15.6444	9.70142	0.685728	13.7548	protein_coding
ENSG00000099284	H2AFY2	5.77991	5.74006	1.80667	3.17714	0.00148734	0.0071983	0	0	0	0	0.517977	0	0	0	0	18.768	11.1191	36.2219	0	2.04207	0	0	0	35.3694	protein_coding
ENSG00000184709	LRRC26	11.0154	5.73248	1.87441	3.05829	0.00222605	0.0101097	0	0.926896	1.77933	0	0.517977	0	0	0	0	115.056	0	0	30.1134	8.16828	0	41.7161	0	0	protein_coding
ENSG00000166803	KIAA0101	58.7117	5.72486	0.452244	12.6588	1.00029e-36	7.52071e-34	1.09071	0	0.889666	1.02371	4.66179	2.34674	3.75356	1.68399	3.68952	164.832	195.379	162.999	38.4205	72.4935	102.4	89.2531	109.716	102.178	protein_coding
ENSG00000250722	SEPP1	4.54176	5.71952	2.044	2.7982	0.00513888	0.0203673	0	0	0	0	0	0	0	0	0	9.79198	2.38267	36.2219	0	0	0	3.88057	0	29.4745	protein_coding
ENSG00000089685	BIRC5	37.2202	5.71735	0.579819	9.86058	6.16941e-23	1.23693e-20	2.18142	0	0.889666	2.04742	0.517977	2.34674	0	4.20997	0	105.264	132.636	111.382	10.3839	39.8204	55.4664	69.8502	87.7732	45.1942	protein_coding
ENSG00000167880	EVPL	4.46552	5.71591	1.29277	4.42144	9.80473e-06	9.48737e-05	0	0	0	0	0	0	0	0	0	5.71199	3.1769	14.4888	0	1.02103	4.26665	0.970142	50.7439	0	protein_coding
ENSG00000156970	BUB1B	15.7842	5.70125	0.715224	7.97127	1.5705e-15	1.02051e-13	0	0.926896	0	1.02371	1.03595	0.782247	1.87678	0	0	31.0079	60.3611	22.6387	14.5375	11.2314	54.0442	13.582	21.9433	49.1241	protein_coding
ENSG00000124780	KCNK17	21.7751	5.69787	1.3979	4.07603	4.58119e-05	0.000362947	0	0	0	0	0	0	3.75356	1.68399	2.76714	0.815998	192.997	4.52774	1.03839	0	45.5109	28.1341	0.685728	110.038	protein_coding
ENSG00000095932	SMIM24	212.369	5.68184	0.6014	9.4477	3.46369e-21	5.20835e-19	1.09071	4.63448	1.77933	19.4505	4.66179	3.12899	22.5213	5.89396	11.9909	103.632	230.325	261.703	422.626	653.462	459.376	1318.42	13.0288	284.92	protein_coding
ENSG00000188011	RTP5	50.912	5.6808	1.09662	5.18028	2.21549e-07	3.22501e-06	0	2.78069	1.77933	0	0.517977	0.782247	9.38389	3.36798	0	0	105.632	60.6717	15.5759	7.14724	486.398	18.4327	5.48582	198.461	protein_coding
ENSG00000254802	AC022182.2	5.58182	5.66504	0.931795	6.0797	1.20404e-09	2.72669e-08	1.09071	0	0	0	0	0	0	0	0	0.815998	8.73647	23.5442	7.26875	4.08414	4.26665	6.79099	14.4003	29.4745	lncRNA
ENSG00000153531	ADPRHL1	32.5209	5.65844	0.78292	7.22736	4.92487e-13	2.06137e-11	0	1.85379	4.44833	2.04742	1.03595	1.56449	0	0	0	93.0238	64.3322	57.0495	150.567	2.04207	140.799	1.94028	25.3719	39.2993	protein_coding
ENSG00000134253	TRIM45	4.30346	5.655	0.989587	5.71451	1.10021e-08	2.09416e-07	0	0	0	0	0	0	0	0	0	31.8239	0.794225	9.05548	5.19197	2.04207	11.3777	7.76114	5.48582	3.92993	protein_coding
ENSG00000229425	AJ009632.2	54.592	5.65418	1.29132	4.3786	1.19443e-05	0.000112818	1.09071	2.78069	0.889666	2.04742	3.62584	0	5.63033	3.36798	0	0.815998	108.015	671.011	2.07679	108.23	71.1108	0	0	1.96496	lncRNA
ENSG00000166352	C11orf74	17.3069	5.64907	0.806527	7.00419	2.48419e-12	9.06667e-11	0	0.926896	0	0	0.517977	2.34674	0	0.841994	0.922379	127.296	6.3538	30.7886	3.11518	45.9466	12.7999	17.4626	28.8006	33.4044	protein_coding
ENSG00000139679	LPAR6	99.413	5.64664	0.594334	9.50079	2.08307e-21	3.19624e-19	6.54425	5.56137	0	3.07113	5.17977	3.12899	3.75356	6.73595	0.922379	49.7759	288.304	35.3164	431.972	21.4417	546.131	95.0739	123.431	163.092	protein_coding
ENSG00000211896	IGHG1	5.42932	5.64425	1.13766	4.96127	7.00324e-07	9.03929e-06	0	0	0	0	0	0	0	0.841994	0	26.9279	3.1769	29.8831	9.34554	0	0	3.88057	2.05718	21.6146	IG_C_gene
ENSG00000024526	DEPDC1	5.27244	5.62589	1.07197	5.24817	1.5362e-07	2.3123e-06	0	0	0	0	0.517977	0	0	0	0	15.504	3.1769	29.8831	0	12.2524	2.84443	13.582	17.1432	0	protein_coding
ENSG00000140534	TICRR	4.21792	5.62254	1.06103	5.29912	1.16363e-07	1.82076e-06	0	0	0	0	0	0	0	0	0	39.9839	1.58845	5.43329	1.03839	2.04207	11.3777	5.82085	2.74291	5.89489	protein_coding
ENSG00000019991	HGF	12.4873	5.61006	0.844438	6.64354	3.06231e-11	9.32144e-10	0	0	0.889666	0	0.517977	0	0	0.841994	1.84476	4.07999	21.4441	18.111	36.3438	70.4514	4.26665	32.9848	5.48582	27.5095	protein_coding
ENSG00000109805	NCAPG	54.807	5.60393	0.543584	10.3092	6.40078e-25	1.41542e-22	0	0.926896	1.77933	1.02371	2.58989	7.82247	3.75356	0.841994	0.922379	131.376	193.791	98.7047	14.5375	65.3462	203.377	54.328	111.088	94.3183	protein_coding
ENSG00000145284	SCD5	6.56287	5.58812	0.943832	5.92067	3.20636e-09	6.67784e-08	0	0.926896	0	0	0.517977	0	0	0	0	25.2959	10.3249	17.2054	17.6527	7.14724	2.84443	10.6716	0	25.5445	protein_coding
ENSG00000132938	MTUS2	4.152	5.58696	1.38104	4.04547	5.22175e-05	0.00040747	0	0	0	0	0	0	0	0	0	3.26399	0	7.24438	4.15357	1.02103	0	0	31.5435	27.5095	protein_coding
ENSG00000187730	GABRD	4.1033	5.58055	1.30667	4.27081	1.94761e-05	0.000171064	0	0	0	0	0	0	0	0	0	0	5.55957	14.4888	38.4205	0	7.11108	4.85071	3.42864	0	protein_coding
ENSG00000176834	VSIG10	57.0323	5.57733	0.498511	11.188	4.67016e-29	1.75563e-26	4.36283	0.926896	0.889666	3.07113	3.10786	3.12899	1.87678	1.68399	1.84476	119.952	88.1589	197.409	224.293	73.5145	34.1332	170.745	26.7434	70.7387	protein_coding
ENSG00000164045	CDC25A	15.6641	5.56566	0.729668	7.62766	2.39045e-14	1.231e-12	1.09071	0	0	1.02371	2.07191	0.782247	0	0	0	72.6239	51.6246	31.6942	10.3839	9.18931	38.3998	16.4924	30.8578	15.7197	protein_coding
ENSG00000253731	PCDHGA6	6.3414	5.54872	1.07604	5.15661	2.51457e-07	3.59426e-06	0	0	0	1.02371	0	0.782247	0	0	0	3.26399	38.917	33.5053	14.5375	0	9.95551	8.73128	3.42864	0	protein_coding
ENSG00000067141	NEO1	3.91479	5.51395	1.21566	4.53578	5.73916e-06	5.88089e-05	0	0	0	0	0	0	0	0	0	12.24	3.1769	30.7886	0	2.04207	1.42222	0	10.9716	9.82482	protein_coding
ENSG00000170312	CDK1	18.1019	5.5061	0.639559	8.60922	7.35589e-18	6.545e-16	1.09071	0	0	0	1.03595	1.56449	1.87678	1.68399	0	83.2318	35.7401	44.3718	11.4223	25.5259	25.5999	33.955	39.0865	19.6496	protein_coding
ENSG00000137726	FXYD6	36.9716	5.50359	1.28093	4.29655	1.73476e-05	0.000154811	5.45354	0	2.669	1.02371	2.58989	0	1.87678	0.841994	0	3.26399	6.3538	11.7721	3.11518	261.385	0	335.669	0	29.4745	protein_coding
ENSG00000175063	UBE2C	9.63621	5.49787	0.830076	6.62333	3.51184e-11	1.06467e-09	0	0.926896	0.889666	1.02371	0	0	0	0	0.922379	29.3759	9.5307	15.3943	2.07679	26.5469	24.1777	22.3133	36.3436	3.92993	protein_coding
ENSG00000164929	BAALC	87.8191	5.49014	0.937298	5.85741	4.70133e-09	9.52747e-08	0	5.56137	1.77933	0	2.58989	3.12899	22.5213	0.841994	0	70.9919	127.076	10.8666	7.26875	478.865	14.2222	434.624	253.034	147.372	protein_coding
ENSG00000117407	ARTN	3.818	5.48293	1.39458	3.93158	8.43878e-05	0.000619902	0	0	0	0	0	0	0	0	0	0	1.58845	0.905548	2.07679	12.2524	0	32.0147	19.8861	0	protein_coding
ENSG00000129195	FAM64A	4.84695	5.47578	1.1439	4.78696	1.6933e-06	1.99234e-05	0	0	0	0	0	0	1.87678	0	0	44.0639	1.58845	8.14993	0	8.16828	0	3.88057	11.6574	7.85986	protein_coding
ENSG00000158402	CDC25C	4.72139	5.46947	0.983342	5.56213	2.66507e-08	4.69259e-07	0	0	0	0	0.517977	0	0	0	0	39.9839	1.58845	12.6777	5.19197	4.08414	2.84443	3.88057	10.2859	3.92993	protein_coding
ENSG00000130635	COL5A1	67.0188	5.46836	0.604568	9.04506	1.4958e-19	1.79939e-17	2.18142	5.56137	0.889666	2.04742	5.17977	1.56449	7.50711	2.52598	0	431.663	125.488	172.96	29.075	101.082	49.7776	88.2829	9.60019	170.952	protein_coding
ENSG00000060140	STYK1	3.76476	5.46613	1.1378	4.80413	1.55423e-06	1.85043e-05	0	0	0	0	0	0	0	0	0	0.815998	0.794225	7.24438	8.30715	2.04207	0	14.5521	28.1148	5.89489	protein_coding
ENSG00000175097	RAG2	3.80621	5.465	1.08604	5.03205	4.85274e-07	6.53273e-06	0	0	0	0	0	0	0	0	0	13.056	0.794225	0	7.26875	9.18931	5.68887	23.2834	1.37146	7.85986	protein_coding
ENSG00000165816	VWA2	3.76305	5.45545	1.33714	4.07994	4.50478e-05	0.000357647	0	0	0	0	0	0	0	0	0	3.26399	4.76535	5.43329	0	17.3576	0	32.9848	0	3.92993	protein_coding
ENSG00000186185	KIF18B	4.62494	5.43954	0.881253	6.1725	6.72178e-10	1.60692e-08	0	0	0	0	0.517977	0	0	0	0	29.3759	7.14802	9.96102	3.11518	6.12621	4.26665	10.6716	6.17155	5.89489	protein_coding
ENSG00000161940	BCL6B	40.3563	5.42882	1.10988	4.89137	1.00137e-06	1.2548e-05	0	2.78069	0	0	0.517977	0	11.2607	3.36798	0	109.344	59.5669	95.988	3.11518	33.6941	214.755	42.6863	0	149.337	protein_coding
ENSG00000177675	CD163L1	3.68826	5.42539	1.30826	4.14704	3.368e-05	0.000277657	0	0	0	0	0	0	0	0	0	4.89599	11.9134	0	9.34554	0	24.1777	0.970142	15.086	0	protein_coding
ENSG00000167900	TK1	33.0873	5.41815	0.561578	9.64808	5.00867e-22	8.55856e-20	2.18142	0.926896	0	0	3.10786	0.782247	1.87678	2.52598	1.84476	84.8638	59.5669	149.415	14.5375	64.3252	21.3332	61.119	89.8304	37.3343	protein_coding
ENSG00000099889	ARVCF	5.78497	5.41549	0.978593	5.53395	3.13091e-08	5.39903e-07	1.09071	0	0	0	0.517977	0	0	0	0	34.2719	10.3249	3.62219	19.7295	11.2314	2.84443	10.6716	0	9.82482	protein_coding
ENSG00000183856	IQGAP3	18.8964	5.4152	0.632063	8.56751	1.0575e-17	9.19169e-16	0	0	0.889666	0	2.07191	0.782247	3.75356	0.841994	0	53.0399	34.1517	55.2384	8.30715	51.0517	41.2443	42.6863	34.2864	11.7898	protein_coding
ENSG00000149131	SERPING1	13.3181	5.41232	0.917788	5.89714	3.69867e-09	7.66839e-08	0	0	0.889666	0	2.58989	0	1.87678	0	0	8.97598	4.76535	90.5548	11.4223	74.5355	4.26665	25.2237	4.8001	9.82482	protein_coding
ENSG00000169607	CKAP2L	39.7664	5.39584	0.554465	9.73162	2.2105e-22	3.95706e-20	3.27212	0	0	5.11855	3.10786	0.782247	1.87678	2.52598	0	96.2878	168.376	119.532	16.6143	40.8414	61.1553	71.7905	89.1446	35.3694	protein_coding
ENSG00000133121	STARD13	7.09745	5.38949	1.08785	4.95424	7.26132e-07	9.34718e-06	0	0	0	0	0.517977	0	0	0	1.84476	4.07999	6.3538	0.905548	12.4607	0	65.422	18.4327	15.7717	1.96496	protein_coding
ENSG00000102048	ASB9	3.59319	5.37948	1.14959	4.67947	2.87612e-06	3.18469e-05	0	0	0	0	0	0	0	0	0	0.815998	8.73647	2.71664	1.03839	17.3576	2.84443	21.3431	0	9.82482	protein_coding
ENSG00000163827	LRRC2	7.04636	5.37598	1.2072	4.45325	8.45792e-06	8.33978e-05	0	0.926896	0	0	0.517977	0	0	0	0.922379	0	10.3249	4.52774	2.07679	0	92.4441	0.970142	8.22874	5.89489	protein_coding
ENSG00000152767	FARP1	19.3187	5.3702	0.995364	5.39522	6.84413e-08	1.1114e-06	2.18142	0.926896	0.889666	0	2.07191	0	0	0.841994	0.922379	146.064	0	16.2999	3.11518	35.7362	27.0221	103.805	0	7.85986	protein_coding
ENSG00000235888	AF064858.1	5.60411	5.37009	1.00018	5.36911	7.9128e-08	1.27393e-06	1.09071	0	0	0	0	0.782247	0	0	0	8.15998	30.1805	37.1275	10.3839	3.0631	2.84443	1.94028	1.37146	3.92993	lncRNA
ENSG00000161888	SPC24	12.5529	5.36988	0.705761	7.60863	2.77007e-14	1.41679e-12	1.09071	1.85379	0	0	0.517977	0	0	1.68399	0	55.4879	21.4441	30.7886	11.4223	15.3155	9.95551	27.164	31.5435	17.6847	protein_coding
ENSG00000130202	PVRL2	32.1154	5.36019	1.17832	4.54901	5.38993e-06	5.55056e-05	2.18142	0	0	0	1.03595	1.56449	9.38389	0.841994	0	0	30.9748	40.7496	44.6509	47.9886	304.354	74.7009	0	19.6496	protein_coding
ENSG00000136999	NOV	5.70171	5.36017	1.23648	4.33503	1.45742e-05	0.000133061	0	0	0	0	0	0.782247	0	0	0.922379	0	0	4.52774	1.03839	6.12621	1.42222	32.0147	2.74291	53.054	protein_coding
ENSG00000148773	MKI67	213.692	5.33909	0.47918	11.1421	7.82305e-29	2.80084e-26	8.72566	1.85379	6.22766	4.09484	20.7191	28.1609	11.2607	5.89396	4.6119	181.968	914.153	635.694	89.3018	157.239	585.953	291.043	473.152	426.397	protein_coding
ENSG00000130300	PLVAP	21.5762	5.33727	0.820995	6.50098	7.97989e-11	2.28559e-09	0	1.85379	2.669	0	1.03595	0.782247	0	2.52598	0	0.815998	50.0362	155.754	23.883	37.7783	1.42222	19.4028	58.9726	31.4394	protein_coding
ENSG00000060558	GNA15	225.57	5.32465	0.65219	8.16426	3.23413e-16	2.4075e-14	11.9978	0	3.55866	1.02371	7.76966	1.56449	56.3033	7.57795	12.9133	107.712	336.751	183.826	568.001	124.566	1595.73	402.609	257.148	381.203	protein_coding
ENSG00000088325	TPX2	53.7955	5.32244	0.517331	10.2883	7.95887e-25	1.73446e-22	0	0	3.55866	3.07113	4.66179	3.12899	7.50711	2.52598	0	139.536	53.2131	86.027	30.1134	124.566	159.288	165.894	157.717	27.5095	protein_coding
ENSG00000100276	RASL10A	8.34517	5.31888	1.02242	5.20223	1.96911e-07	2.89156e-06	0	1.85379	0	0	0.517977	0	0	0.841994	0	20.4	3.97112	11.7721	71.6491	5.10517	15.6444	16.4924	0	1.96496	protein_coding
ENSG00000275832	NA_99	19.8224	5.31848	0.597115	8.90698	5.24432e-19	5.55344e-17	0	0.926896	0.889666	1.02371	1.03595	0	0	2.52598	1.84476	79.1518	32.5632	40.7496	53.9964	34.7152	8.5333	45.5967	33.6007	19.6496	protein_coding
ENSG00000105227	PRX	66.1595	5.3162	0.749169	7.09613	1.28301e-12	4.94683e-11	2.18142	3.70758	3.55866	1.02371	3.10786	2.34674	5.63033	3.36798	4.6119	155.856	6.3538	25.3553	12.4607	154.176	5.68887	705.293	11.6574	84.4935	protein_coding
ENSG00000090889	KIF4A	18.7742	5.31449	0.629048	8.44846	2.95169e-17	2.42539e-15	0	0	0.889666	1.02371	3.10786	0.782247	1.87678	0	0	51.4079	44.4766	74.2549	14.5375	18.3786	18.4888	23.2834	50.0581	35.3694	protein_coding
ENSG00000188051	TMEM221	3.37493	5.3048	1.44517	3.67071	0.00024188	0.00154772	0	0	0	0	0	0	0	0	0	0	0	19.0165	4.15357	17.3576	0	5.82085	14.4003	0	protein_coding
ENSG00000155659	VSIG4	9.52983	5.29922	1.94749	2.72105	0.00650746	0.0246047	1.09071	0	0.889666	0	1.03595	0	0	0	0.922379	0	0	0	0	70.4514	0	83.4322	13.7146	0	protein_coding
ENSG00000116016	EPAS1	10.5053	5.29641	1.13706	4.65799	3.19318e-06	3.49969e-05	3.27212	0	0.889666	0	0.517977	0	0	0	0	0.815998	1.58845	25.3553	2.07679	10.2103	14.2222	118.357	0	11.7898	protein_coding
ENSG00000172037	LAMB2	6.56668	5.29224	1.7175	3.08136	0.0020606	0.00945535	0	0	0	0	0.517977	0	0	1.68399	0	0	0	0.905548	36.3438	49.0097	0	24.2536	5.48582	0	protein_coding
ENSG00000114654	EFCC1	9.63184	5.28956	1.06536	4.96505	6.86823e-07	8.91092e-06	0	0	0	0	1.03595	0	0	0	2.76714	26.9279	3.1769	32.5997	0	39.8204	1.42222	46.5668	1.37146	17.6847	protein_coding
ENSG00000112984	KIF20A	4.19452	5.28648	1.03653	5.10018	3.39326e-07	4.68544e-06	0	0	0	0	0	0.782247	0	0	0	35.9039	0.794225	4.52774	2.07679	15.3155	7.11108	2.91043	4.11437	1.96496	protein_coding
ENSG00000091409	ITGA6	218.308	5.28611	0.664638	7.95337	1.81508e-15	1.13723e-13	28.3584	5.56137	8.007	8.18968	14.5034	3.12899	9.38389	10.9459	10.1462	75.8878	30.1805	35.3164	948.053	40.8414	1947.01	318.207	137.146	298.675	protein_coding
ENSG00000196503	ARL9	3.33385	5.2826	1.15045	4.59178	4.39484e-06	4.63431e-05	0	0	0	0	0	0	0	0	0	4.07999	12.7076	26.2609	6.23036	1.02103	2.84443	0.970142	0	5.89489	protein_coding
ENSG00000159164	SV2A	46.2928	5.28233	0.642949	8.21579	2.10766e-16	1.60065e-14	2.18142	5.56137	0.889666	1.02371	2.58989	0.782247	3.75356	0.841994	3.68952	13.056	65.9207	130.399	47.7661	121.503	12.7999	321.117	10.9716	88.4234	protein_coding
ENSG00000010030	ETV7	3.30595	5.2716	1.3877	3.79879	0.000145402	0.000991569	0	0	0	0	0	0	0	0	0	11.424	2.38267	0	11.4223	31.6521	0	1.94028	0.685728	0	protein_coding
ENSG00000137965	IFI44	32.9802	5.24951	0.826799	6.3492	2.16436e-10	5.77046e-09	1.09071	0	2.669	0	5.17977	2.34674	3.75356	0	0	18.768	5.55957	7.24438	101.763	117.419	278.754	22.3133	13.0288	13.7548	protein_coding
ENSG00000275278	AC012150.2	3.21281	5.23204	1.58614	3.29859	0.000971717	0.00502639	0	0	0	0	0	0	0	0	0	6.52799	0	0.905548	0	1.02103	0	39.7758	9.60019	0	lncRNA
ENSG00000122952	ZWINT	19.79	5.2312	0.621813	8.41281	4.0032e-17	3.21904e-15	0	0	0	2.04742	2.07191	1.56449	0	0.841994	1.84476	84.8638	38.917	70.6327	12.4607	31.6521	15.6444	32.0147	45.9438	15.7197	protein_coding
ENSG00000189060	H1F0	165.862	5.22781	0.511176	10.227	1.50042e-24	3.17773e-22	4.36283	4.63448	8.89666	9.21339	11.3955	2.34674	16.891	14.3139	6.45665	175.44	169.964	435.568	781.91	198.081	103.822	413.281	17.8289	611.104	protein_coding
ENSG00000167549	CORO6	24.7869	5.22078	0.633256	8.24434	1.66073e-16	1.28723e-14	3.27212	1.85379	0.889666	0	0	0	3.75356	3.36798	0	22.032	18.2672	57.0495	79.9563	54.1148	15.6444	119.327	25.3719	41.2643	protein_coding
ENSG00000138160	KIF11	16.7712	5.2043	0.56655	9.18594	4.07939e-20	5.24289e-18	2.18142	0	0.889666	0	0.517977	1.56449	0	1.68399	0.922379	29.3759	46.8593	47.994	15.5759	23.4838	22.7555	36.8654	39.7722	31.4394	protein_coding
ENSG00000136158	SPRY2	60.3761	5.20331	0.642532	8.09813	5.58095e-16	3.92153e-14	5.45354	1.85379	0.889666	3.07113	2.58989	3.91124	0	8.41994	1.84476	40.7999	69.0976	25.3553	30.1134	7.14724	187.733	63.0592	381.951	253.48	protein_coding
ENSG00000115163	CENPA	4.99757	5.20121	1.0126	5.13648	2.79937e-07	3.94509e-06	0	0	0	1.02371	0	0	0	0.841994	0	49.7759	2.38267	9.96102	1.03839	2.04207	5.68887	5.82085	5.48582	5.89489	protein_coding
ENSG00000198010	DLGAP2	6.47547	5.19434	1.82651	2.84386	0.00445712	0.0181336	1.09071	0	0	0	0	0.782247	1.87678	0	0	49.7759	0.794225	0	0	22.4628	0	39.7758	0	0	protein_coding
ENSG00000237649	NA_70	21.2149	5.19337	0.653342	7.94892	1.88144e-15	1.16906e-13	1.09071	0	0.889666	0	1.55393	0	5.63033	1.68399	0.922379	115.056	34.9459	38.9385	15.5759	19.3997	66.8442	32.9848	40.458	5.89489	protein_coding
ENSG00000256235	SMIM3	255.833	5.18491	0.532744	9.73247	2.19209e-22	3.95706e-20	29.4491	0	7.11733	5.11855	12.9494	3.12899	50.673	5.89396	12.9133	262.751	692.564	271.664	663.533	319.584	172.088	621.861	1110.19	363.518	protein_coding
ENSG00000126787	DLGAP5	9.05345	5.18146	0.769086	6.73717	1.61503e-11	5.20027e-10	0	1.85379	0	0	1.03595	0.782247	0	0	0	16.32	24.621	24.4498	4.15357	12.2524	31.2888	25.2237	15.086	5.89489	protein_coding
ENSG00000251034	AC037459.2	3.99044	5.17974	0.863872	5.99596	2.02288e-09	4.37671e-08	1.09071	0	0	0	0	0	0	0	0	2.448	3.97112	13.5832	12.4607	8.16828	2.84443	10.6716	4.8001	11.7898	lncRNA
ENSG00000143858	SYT2	3.06876	5.17327	1.49291	3.46522	0.0005298	0.00299271	0	0	0	0	0	0	0	0	0	0	6.3538	9.05548	0	6.12621	2.84443	0	30.8578	0	protein_coding
ENSG00000110090	CPT1A	493.04	5.17257	0.415406	12.4519	1.36633e-35	8.93285e-33	14.1792	18.5379	6.22766	12.2845	32.6326	12.516	105.1	20.2079	23.9819	926.974	766.427	798.693	669.764	1713.3	507.731	1150.59	1525.74	569.84	protein_coding
ENSG00000139734	DIAPH3	13.851	5.16062	0.643651	8.01773	1.07718e-15	7.13548e-14	0	0.926896	0	0	1.55393	2.34674	0	0	0.922379	13.872	21.4441	41.6552	12.4607	30.631	35.5554	26.1938	48.001	13.7548	protein_coding
ENSG00000135451	TROAP	12.0204	5.15756	0.711838	7.24541	4.3112e-13	1.8159e-11	1.09071	0	0	0	1.55393	0.782247	0	1.68399	0	47.3279	10.3249	26.2609	10.3839	27.5679	21.3332	33.955	30.172	3.92993	protein_coding
ENSG00000178773	CPNE7	51.776	5.15721	0.645527	7.98914	1.35883e-15	8.88376e-14	4.36283	0.926896	3.55866	0	6.7337	0.782247	5.63033	0.841994	2.76714	4.89599	29.3863	28.072	246.099	88.83	79.6441	290.072	84.3445	55.019	protein_coding
ENSG00000229839	AC018462.1	3.02517	5.15386	1.50579	3.4227	0.00062003	0.00341078	0	0	0	0	0	0	0	0	0	25.2959	5.55957	5.43329	0	1.02103	0	0	17.1432	0	lncRNA
ENSG00000106078	COBL	11.3524	5.14166	1.00533	5.11442	3.14708e-07	4.41442e-06	0	1.85379	0.889666	0	0	0	0	0	2.76714	73.4399	0	2.71664	35.3054	4.08414	2.84443	42.6863	24.0005	13.7548	protein_coding
ENSG00000166341	DCHS1	51.6059	5.14083	1.06579	4.8235	1.41059e-06	1.69961e-05	3.27212	0	0	3.07113	3.10786	3.91124	5.63033	5.05196	1.84476	673.199	37.3286	72.4438	9.34554	4.08414	11.3777	4.85071	0	90.3884	protein_coding
ENSG00000143434	SEMA6C	39.1889	5.13604	0.589219	8.71669	2.86459e-18	2.67545e-16	0	4.63448	0.889666	0	3.10786	3.12899	1.87678	3.36798	1.84476	80.7838	52.4188	155.754	78.9179	7.14724	61.1553	11.6417	138.517	100.213	protein_coding
ENSG00000106571	GLI3	3.84677	5.13539	1.37399	3.73757	0.000185809	0.0012303	0	0	0	0	0	0	0	0	0.922379	8.97598	19.8556	7.24438	0	0	18.4888	0	0	13.7548	protein_coding
ENSG00000162849	KIF26B	3.78403	5.13416	1.4382	3.56985	0.000357183	0.00216222	0	0	0	0	0	0	0	0.841994	0	36.7199	0	0	1.03839	11.2314	0	3.88057	14.4003	0	protein_coding
ENSG00000170891	CYTL1	20.8906	5.12247	0.818716	6.25671	3.93177e-10	9.85367e-09	0	3.70758	0.889666	0	2.58989	0	3.75356	0	0	17.952	40.5055	79.6882	0	25.5259	5.68887	62.0891	58.9726	74.6687	protein_coding
ENSG00000110237	ARHGEF17	40.1936	5.12055	0.808231	6.3355	2.36568e-10	6.2299e-09	1.09071	0.926896	1.77933	0	5.69775	0	11.2607	0	0.922379	43.2479	4.76535	11.7721	23.883	195.018	48.3554	266.789	100.116	7.85986	protein_coding
ENSG00000066735	KIF26A	23.4109	5.1185	1.20072	4.26285	2.01832e-05	0.00017645	0	0	0	1.02371	0.517977	0	0	0	10.1462	188.496	19.0614	29.8831	14.5375	2.04207	9.95551	3.88057	139.889	1.96496	protein_coding
ENSG00000282692	AC129915.3	2.97406	5.11834	1.56789	3.26448	0.00109665	0.00558046	0	0	0	0	0	0	0	0	0	4.89599	0	0.905548	0	15.3155	0	31.0445	1.37146	0	lncRNA
ENSG00000211892	IGHG4	7.16933	5.11215	1.29651	3.94301	8.04639e-05	0.000595734	0	0	0	0	0.517977	2.34674	0	0	0	0.815998	3.97112	38.9385	8.30715	0	0	40.746	0	33.4044	IG_C_gene
ENSG00000072832	CRMP1	17.6344	5.11145	1.45821	3.50528	0.000456123	0.00264	5.45354	0	0	3.07113	0.517977	0	0	0	0	206.448	13.5018	9.05548	1.03839	0	36.9776	0	2.05718	39.2993	protein_coding
ENSG00000065328	MCM10	21.286	5.11109	0.609601	8.38432	5.10193e-17	4.08073e-15	1.09071	0.926896	0	3.07113	0.517977	1.56449	0	2.52598	0.922379	91.3918	44.4766	88.7437	12.4607	13.2735	21.3332	28.1341	29.4863	43.2292	protein_coding
ENSG00000125378	BMP4	9.6043	5.09666	1.1312	4.50552	6.62111e-06	6.69884e-05	0	2.78069	0	0	1.55393	0	0	0	0	73.4399	11.9134	9.05548	1.03839	0	12.7999	1.94028	1.37146	56.984	protein_coding
ENSG00000152253	SPC25	5.69917	5.09634	0.809593	6.29494	3.07525e-10	7.89121e-09	0	0	0	0	1.03595	0	1.87678	0	0	9.79198	23.8267	8.14993	5.19197	11.2314	4.26665	13.582	15.7717	7.85986	protein_coding
ENSG00000165349	SLC7A3	12.7102	5.08523	1.70845	2.97653	0.00291533	0.0127325	0	0	1.77933	4.09484	0.517977	0	0	0	0	53.8559	46.8593	41.6552	0	0	1.42222	0	0	78.5986	protein_coding
ENSG00000169184	MN1	14.7524	5.0841	1.05563	4.81616	1.4635e-06	1.75631e-05	5.45354	0	0	0	0.517977	0	0	1.68399	0	0.815998	0.794225	5.43329	7.26875	4.08414	160.71	6.79099	42.5151	29.4745	protein_coding
ENSG00000135476	ESPL1	3.62339	5.08008	0.963544	5.27229	1.34735e-07	2.06315e-06	0	0	0	1.02371	0	0	0	0	0	22.032	12.7076	3.62219	3.11518	5.10517	8.5333	2.91043	6.17155	0	protein_coding
ENSG00000184261	KCNK12	18.5401	5.07346	0.853801	5.9422	2.81215e-09	5.92245e-08	0	0	0.889666	0	0.517977	1.56449	0	2.52598	3.68952	48.1439	33.3574	8.14993	50.8813	36.7572	0	64.0294	0.685728	82.5285	protein_coding
ENSG00000084710	EFR3B	4.61166	5.06707	1.25232	4.04616	5.20651e-05	0.000406491	0	0	0	2.04742	0	0	0	0	0	2.448	2.38267	0.905548	42.5741	24.5048	4.26665	3.88057	0	0	protein_coding
ENSG00000105472	CLEC11A	216.654	5.05705	0.706606	7.15681	8.25742e-13	3.30231e-11	4.36283	12.0496	10.676	7.16597	20.7191	8.60472	22.5213	16.8399	11.0685	58.7519	1.58845	188.354	246.099	1198.69	105.244	1822.9	111.088	53.054	protein_coding
ENSG00000186652	PRG2	2.83201	5.05684	1.15101	4.39338	1.11602e-05	0.00010628	0	0	0	0	0	0	0	0	0	3.26399	11.1191	2.71664	1.03839	4.08414	2.84443	25.2237	0.685728	0	protein_coding
ENSG00000136379	ABHD17C	66.0588	5.05171	0.804984	6.27553	3.48435e-10	8.79097e-09	4.36283	0	5.338	7.16597	2.07191	3.91124	1.87678	2.52598	7.37903	3.26399	220	6.33883	99.6857	36.7572	63.9997	2.91043	21.9433	699.527	protein_coding
ENSG00000160801	PTH1R	2.82362	5.04828	1.40873	3.58356	0.000338945	0.00206763	0	0	0	0	0	0	0	0	0	0	0	1.8111	11.4223	1.02103	0	17.4626	17.1432	1.96496	protein_coding
ENSG00000253846	PCDHGA10	5.62714	5.04324	1.08596	4.64404	3.41661e-06	3.70408e-05	2.18142	0	0	0	0.517977	0	0	0	0	0.815998	15.8845	30.7886	17.6527	0	17.0666	1.94028	0.685728	13.7548	protein_coding
ENSG00000166068	SPRED1	11.9224	5.04293	0.912334	5.52751	3.24814e-08	5.58197e-07	0	1.85379	0.889666	2.04742	0.517977	0.782247	0	0	0	0	19.8556	15.3943	1.03839	5.10517	52.622	12.6118	66.5156	35.3694	protein_coding
ENSG00000181264	TMEM136	5.59392	5.03787	1.16631	4.31948	1.56399e-05	0.000141029	0	0	0	1.02371	0.517977	0	1.87678	0	0	38.3519	30.9748	11.7721	0	1.02103	1.42222	1.94028	0	11.7898	protein_coding
ENSG00000178999	AURKB	53.9181	5.03162	0.516961	9.73307	2.1792e-22	3.95706e-20	0	0	1.77933	3.07113	2.07191	3.12899	11.2607	2.52598	7.37903	208.08	69.8918	104.138	16.6143	105.167	93.8663	91.1934	193.375	56.984	protein_coding
ENSG00000166923	GREM1	4.47023	5.02744	1.22352	4.10901	3.97351e-05	0.00032003	0	0	0	0	0	0.782247	0	0.841994	0	0	19.8556	0.905548	5.19197	10.2103	21.3332	21.3431	0	0	protein_coding
ENSG00000126947	ARMCX1	6.93019	5.0251	0.885373	5.67568	1.38138e-08	2.57395e-07	0	1.85379	0	0	0.517977	0	0	0	0.922379	7.34399	23.0325	20.8276	13.4991	9.18931	2.84443	14.5521	0.685728	29.4745	protein_coding
ENSG00000205755	CRLF2	2.83454	5.01372	1.32155	3.79382	0.000148348	0.00100846	0	0	0	0	0	0	0	0	0	0	2.38267	4.52774	0	12.2524	0	4.85071	3.42864	23.5796	protein_coding
ENSG00000109501	WFS1	88.6123	5.00281	0.620997	8.05609	7.8773e-16	5.38414e-14	5.45354	12.0496	6.22766	5.11855	7.76966	3.91124	3.75356	0.841994	2.76714	532.847	53.2131	143.982	284.52	1.02103	91.0219	40.746	165.946	233.831	protein_coding
ENSG00000006704	GTF2IRD1	3.48273	4.99649	0.972238	5.13916	2.75962e-07	3.89638e-06	0	0	0	1.02371	0	0	0	0	0	24.48	1.58845	7.24438	3.11518	5.10517	9.95551	2.91043	1.37146	5.89489	protein_coding
ENSG00000179242	CDH4	4.375	4.98886	1.45551	3.42758	0.000608983	0.00336294	0	0	0	0	0.517977	0	1.87678	0	0	217.872	12.7076	0	55.0348	0	7.11108	0	0.685728	0	protein_coding
ENSG00000196549	MME	393.358	4.98128	0.702531	7.09047	1.33653e-12	5.11385e-11	30.5398	38.9296	16.014	34.8061	13.9854	43.0236	13.1374	10.9459	15.6804	1574.06	1895.81	674.633	20.7679	379.825	75.3775	347.311	1.37146	1894.23	protein_coding
ENSG00000167912	AC090152.1	8.19031	4.97928	0.875391	5.68806	1.28488e-08	2.40307e-07	0	1.85379	0	0	0.517977	0	0	0	1.84476	33.4559	1.58845	24.4498	10.3839	32.6731	1.42222	10.6716	8.91446	19.6496	lncRNA
ENSG00000127955	GNAI1	9.91584	4.97292	0.693751	7.16816	7.60125e-13	3.06434e-11	2.18142	0.926896	0.889666	0	0.517977	0	1.87678	0	0	17.952	35.7401	8.14993	12.4607	9.18931	18.4888	30.0744	16.4575	23.5796	protein_coding
ENSG00000167535	CACNB3	30.075	4.96542	0.542493	9.15297	5.5387e-20	6.88309e-18	1.09071	0.926896	0.889666	2.04742	0.517977	0	3.75356	5.89396	2.76714	110.976	44.4766	115.91	51.9197	34.7152	15.6444	29.1043	77.4873	43.2292	protein_coding
ENSG00000174233	ADCY6	10.158	4.96073	0.816	6.07933	1.20687e-09	2.72679e-08	0	0	0	0	0	0	1.87678	0.841994	3.68952	13.872	8.73647	18.111	47.7661	5.10517	4.26665	9.70142	31.5435	37.3343	protein_coding
ENSG00000163975	MFI2	15.8449	4.93545	0.939083	5.25561	1.47535e-07	2.23187e-06	0	2.78069	0.889666	0	0.517977	3.12899	1.87678	0	0	0	89.7474	4.52774	1.03839	29.61	34.1332	6.79099	90.5161	19.6496	protein_coding
ENSG00000117399	CDC20	22.5577	4.92809	0.718299	6.86077	6.84891e-12	2.30396e-10	0	0	0	2.04742	3.62584	3.12899	1.87678	1.68399	0	113.424	18.2672	39.8441	6.23036	28.589	93.8663	40.746	50.7439	1.96496	protein_coding
ENSG00000130508	PXDN	316.478	4.92676	0.385387	12.7839	2.01571e-37	1.78295e-34	19.6327	40.7834	21.352	12.2845	15.0213	9.38697	50.673	12.6299	3.68952	636.479	432.058	600.378	409.127	570.758	204.799	707.234	1178.08	772.231	protein_coding
ENSG00000066279	ASPM	58.603	4.90933	0.532905	9.21239	3.18945e-20	4.24423e-18	2.18142	0	0	5.11855	8.80561	8.60472	3.75356	1.68399	2.76714	29.3759	225.56	143.982	34.267	45.9466	184.888	102.835	123.431	131.653	protein_coding
ENSG00000272563	AC016745.2	5.38383	4.90521	2.01336	2.43633	0.014837	0.0480104	0	1.85379	0	0	0	0	1.87678	0	0	0	25.4152	3.62219	5.19197	0	0	0	0	58.9489	lncRNA
ENSG00000103485	QPRT	13.3847	4.8955	0.743658	6.583	4.61049e-11	1.36472e-09	1.09071	0.926896	0.889666	0	1.55393	0	1.87678	1.68399	0	6.52799	26.2094	7.24438	25.9598	29.61	46.9331	30.0744	60.3441	0	protein_coding
ENSG00000105011	ASF1B	36.0551	4.89497	0.528322	9.26513	1.94839e-20	2.68789e-18	1.09071	0	0.889666	4.09484	3.10786	1.56449	3.75356	5.05196	1.84476	230.112	56.39	74.2549	26.9982	62.2831	25.5999	58.2085	60.3441	33.4044	protein_coding
ENSG00000196188	CTSE	2.52184	4.88521	1.52067	3.21254	0.00131568	0.00650142	0	0	0	0	0	0	0	0	0	9.79198	0.794225	18.111	0	4.08414	0	12.6118	0	0	protein_coding
ENSG00000106070	GRB10	38.8421	4.88087	0.498356	9.79395	1.19536e-22	2.33436e-20	3.27212	4.63448	1.77933	1.02371	2.07191	0.782247	0	6.73595	1.84476	48.1439	21.4441	38.033	97.609	55.1359	66.8442	199.849	57.6012	92.3533	protein_coding
ENSG00000164161	HHIP	16.403	4.87598	1.56279	3.12005	0.0018082	0.00847829	1.09071	3.70758	0	0	0	0	5.63033	0	0	106.896	2.38267	0	3.11518	1.02103	14.2222	155.223	0	1.96496	protein_coding
ENSG00000229950	TFAP2A-AS1	6.34824	4.87033	1.11134	4.3824	1.17381e-05	0.00011129	0	0	0	0	0	0.782247	0	2.52598	0	55.4879	27.7979	14.4888	2.07679	3.0631	1.42222	3.88057	2.74291	0	lncRNA
ENSG00000122043	LINC00544	3.23654	4.86799	1.59461	3.05277	0.00226741	0.0102696	0	0.926896	0	0	0	0	0	0	0	3.26399	8.73647	9.96102	0	0	0	0	0	35.3694	lncRNA
ENSG00000157077	ZFYVE9	5.20939	4.86138	1.09523	4.4387	9.05053e-06	8.87755e-05	0	0.926896	0.889666	0	0	0	1.87678	0	0	0	12.7076	22.6387	7.26875	1.02103	14.2222	0	2.74291	29.4745	protein_coding
ENSG00000183154	AC138356.1	3.95739	4.85601	0.824737	5.88796	3.90999e-09	8.04302e-08	0	0	0.889666	1.02371	0	0	0	0	0	8.15998	5.55957	14.4888	7.26875	5.10517	7.11108	13.582	4.11437	3.92993	lncRNA
ENSG00000177398	UMODL1	8.68614	4.85508	0.988641	4.91087	9.06751e-07	1.14482e-05	0	0	1.77933	0	0.517977	0	0	2.52598	0	3.26399	1.58845	3.62219	4.15357	40.8414	15.6444	7.76114	72.6872	1.96496	protein_coding
ENSG00000271857	AL096865.1	2.48011	4.85457	1.5372	3.15806	0.00158823	0.00759372	0	0	0	0	0	0	0	0	0	0	0	0	4.15357	13.2735	2.84443	22.3133	2.05718	0	lncRNA
ENSG00000176842	IRX5	3.15259	4.85343	1.32573	3.66095	0.000251287	0.00159638	0	0	0	0	0	0	0	0	0.922379	6.52799	11.1191	0.905548	29.075	0	4.26665	0	0	3.92993	protein_coding
ENSG00000197256	KANK2	45.7683	4.85038	0.585422	8.28527	1.17843e-16	9.22919e-15	8.72566	0.926896	4.44833	1.02371	2.07191	7.04023	3.75356	0	0	102.816	144.549	116.816	65.4188	24.5048	110.933	14.5521	31.5435	184.707	protein_coding
ENSG00000165912	PACSIN3	3.10032	4.84163	1.00905	4.79822	1.60082e-06	1.89988e-05	0	0	0	0	0	0	0	0.841994	0	2.448	1.58845	10.8666	1.03839	2.04207	4.26665	2.91043	21.9433	7.85986	protein_coding
ENSG00000051341	POLQ	10.0661	4.83832	0.699575	6.91609	4.6429e-12	1.61236e-10	0	0.926896	0.889666	0	0.517977	1.56449	0	0	1.84476	17.136	44.4766	28.9775	5.19197	13.2735	18.4888	12.6118	27.4291	7.85986	protein_coding
ENSG00000277587	AC008759.3	3.87972	4.83564	1.46678	3.29678	0.000978003	0.00505264	0	0	0.889666	0	0.517977	0	0	0	0	23.664	0	0	11.4223	7.14724	0	26.1938	0	0	lncRNA
ENSG00000189184	PCDH18	2.50404	4.83399	1.60956	3.00331	0.00267061	0.0118042	0	0	0	0	0	0	0	0	0	5.71199	7.94225	0.905548	1.03839	0	0	0	0	29.4745	protein_coding
ENSG00000228109	MELTF-AS1	3.04641	4.83071	0.821129	5.88301	4.02882e-09	8.25359e-08	0	0	0	0	0	0.782247	0	0	0	8.15998	4.76535	7.24438	7.26875	4.08414	4.26665	6.79099	7.54301	3.92993	lncRNA
ENSG00000182963	GJC1	6.31986	4.83038	1.35674	3.56028	0.000370464	0.0022256	0	2.78069	0	0	0	0.782247	0	0	0	21.216	1.58845	73.3494	0	0	2.84443	0	1.37146	9.82482	protein_coding
ENSG00000182580	EPHB3	5.72216	4.81741	1.0544	4.56888	4.90344e-06	5.0991e-05	0	0	0.889666	0	1.03595	0	0	0	0.922379	16.32	3.1769	47.0885	1.03839	7.14724	2.84443	4.85071	0	17.6847	protein_coding
ENSG00000155254	MARVELD1	55.0251	4.81147	0.648818	7.41575	1.20938e-13	5.56129e-12	8.72566	0	5.338	0	5.17977	1.56449	11.2607	1.68399	1.84476	59.5679	37.3286	305.17	47.7661	127.629	4.26665	124.178	205.718	43.2292	protein_coding
ENSG00000088305	DNMT3B	13.881	4.80982	0.854217	5.63068	1.79503e-08	3.27571e-07	1.09071	0	0.889666	0	2.58989	0.782247	3.75356	0	0	21.216	3.1769	9.05548	151.605	11.2314	7.11108	18.4327	13.0288	5.89489	protein_coding
ENSG00000169992	NLGN2	6.16153	4.80754	1.31092	3.66729	0.000245133	0.00156567	0	0	0	0	0	1.56449	0	0	1.84476	37.5359	0	4.52774	40.4973	1.02103	4.26665	0	0	19.6496	protein_coding
ENSG00000158806	NPM2	6.19724	4.8008	1.07979	4.44605	8.74645e-06	8.5961e-05	2.18142	0.926896	0	1.02371	0	0	0	0	0	0	6.3538	44.3718	26.9982	7.14724	1.42222	13.582	7.54301	0	protein_coding
ENSG00000164932	CTHRC1	4.89687	4.80034	1.26766	3.78676	0.000152622	0.00103378	0	0	2.669	0	0	0	0	0	0	31.8239	7.14802	3.62219	0	19.3997	0	7.76114	0	15.7197	protein_coding
ENSG00000140848	CPNE2	64.2223	4.79213	0.568057	8.436	3.28372e-17	2.65788e-15	1.09071	1.85379	2.669	2.04742	5.69775	2.34674	15.0142	5.05196	6.45665	512.447	57.1842	87.8381	85.1482	74.5355	18.4888	159.103	83.6588	35.3694	protein_coding
ENSG00000227220	AL133346.1	2.96161	4.786	1.48988	3.21233	0.00131662	0.00650393	0	0	0	0	0.517977	0	0	0	0	39.1679	2.38267	6.33883	0	1.02103	0	3.88057	0	0	lncRNA
ENSG00000226659	AC021028.1	3.7665	4.77691	1.08028	4.4219	9.78387e-06	9.47328e-05	0	0	0	0	0	0	0	0.841994	0.922379	34.2719	0.794225	3.62219	5.19197	0	1.42222	6.79099	4.11437	9.82482	lncRNA
ENSG00000171004	HS6ST2	2.34705	4.77635	1.69899	2.81129	0.00493433	0.0196751	0	0	0	0	0	0	0	0	0	0	7.94225	7.24438	0	0	0	0	19.2004	7.85986	protein_coding
ENSG00000172260	NEGR1	44.4587	4.76453	0.555769	8.57286	1.00943e-17	8.82492e-16	2.18142	0	5.338	5.11855	3.10786	3.12899	0	5.05196	3.68952	84.0478	125.488	71.5383	36.3438	88.83	12.7999	34.9251	285.263	33.4044	protein_coding
ENSG00000189431	RASSF10	2.34097	4.7639	1.38383	3.44255	0.000576265	0.00321141	0	0	0	0	0	0	0	0	0	11.424	0	0.905548	0	4.08414	0	16.4924	1.37146	7.85986	protein_coding
ENSG00000140932	CMTM2	22.8464	4.76019	0.663726	7.17193	7.39464e-13	2.98906e-11	2.18142	0	0	2.04742	3.10786	0.782247	1.87678	0	4.6119	93.8398	28.5921	93.2714	13.4991	28.589	1.42222	53.3578	48.6867	35.3694	protein_coding
ENSG00000170801	HTRA3	2.30473	4.75694	1.38091	3.44479	0.000571507	0.00318878	0	0	0	0	0	0	0	0	0	0.815998	9.5307	13.5832	0	12.2524	1.42222	3.88057	0	0	protein_coding
ENSG00000234147	AL035446.1	2.30392	4.75086	1.26932	3.74283	0.000181958	0.00120906	0	0	0	0	0	0	0	0	0	0	3.97112	7.24438	11.4223	0	0	8.73128	6.17155	3.92993	lncRNA
ENSG00000253485	PCDHGA5	2.29723	4.75012	1.28069	3.70904	0.000208048	0.00135782	0	0	0	0	0	0	0	0	0	0.815998	16.6787	11.7721	5.19197	1.02103	0	1.94028	0	3.92993	protein_coding
ENSG00000138180	CEP55	9.67236	4.74605	0.669554	7.08838	1.35692e-12	5.17416e-11	0	0	0.889666	3.07113	0.517977	0.782247	0	0	0.922379	20.4	27.0036	35.3164	8.30715	8.16828	22.7555	11.6417	20.5718	13.7548	protein_coding
ENSG00000117650	NEK2	2.88987	4.74493	0.890502	5.32837	9.90983e-08	1.57188e-06	0	0	0	1.02371	0	0	0	0	0	5.71199	3.97112	11.7721	1.03839	8.16828	5.68887	5.82085	6.85728	1.96496	protein_coding
ENSG00000188672	RHCE	2.2816	4.74275	1.59888	2.96629	0.00301412	0.0130728	0	0	0	0	0	0	0	0	0	22.032	0.794225	3.62219	1.03839	0	0	13.582	0	0	protein_coding
ENSG00000150782	IL18	3.68481	4.74244	1.2202	3.88661	0.000101653	0.000726072	1.09071	0	0	0	0	0	0	0	0.922379	1.632	6.3538	1.8111	0	6.12621	1.42222	45.5967	1.37146	0	protein_coding
ENSG00000143816	WNT9A	3.67642	4.73212	1.18386	3.99719	6.40996e-05	0.000487047	0	0	0	0	0	0	0	0.841994	0.922379	0	0.794225	0.905548	1.03839	9.18931	14.2222	34.9251	1.37146	1.96496	protein_coding
ENSG00000250337	PURPL	2.32504	4.72491	1.63074	2.89741	0.00376263	0.0157865	0	0	0	0	0	0	0	0	0	9.79198	0.794225	2.71664	1.03839	0	0	0	0	27.5095	lncRNA
ENSG00000182704	TSKU	2.29524	4.70267	1.20175	3.91318	9.10883e-05	0.000661368	0	0	0	0	0	0	0	0	0	0	3.97112	8.14993	6.23036	0	2.84443	0.970142	3.42864	15.7197	protein_coding
ENSG00000109113	RAB34	66.9255	4.6976	0.433706	10.8313	2.44611e-27	7.82599e-25	6.54425	7.41516	0	4.09484	6.7337	1.56449	7.50711	4.20997	7.37903	22.032	95.307	172.054	92.417	163.366	150.755	143.581	235.205	84.4935	protein_coding
ENSG00000101447	FAM83D	3.67316	4.68908	1.02368	4.58059	4.63659e-06	4.85181e-05	2.18142	0	0	0	0	0	0	0	0	8.15998	2.38267	0.905548	1.03839	2.04207	25.5999	3.88057	6.17155	13.7548	protein_coding
ENSG00000205336	ADGRG1	95.379	4.68798	0.618329	7.58169	3.41084e-14	1.7211e-12	6.54425	0.926896	8.007	1.02371	4.66179	3.12899	13.1374	10.9459	16.6028	244.8	119.928	88.7437	245.061	65.3462	0	376.415	277.72	233.831	protein_coding
ENSG00000124813	RUNX2	15.1187	4.68751	1.04968	4.46566	7.98227e-06	7.90708e-05	1.09071	0	0	0	0	0	0	2.52598	6.45665	5.71199	1.58845	1.8111	51.9197	83.7248	11.3777	97.0142	8.91446	0	protein_coding
ENSG00000280953	AL390763.2	2.22094	4.68645	1.16258	4.03108	5.55218e-05	0.000429466	0	0	0	0	0	0	0	0	0	16.32	3.1769	0.905548	0	3.0631	9.95551	1.94028	0.685728	3.92993	lncRNA
ENSG00000165556	CDX2	2.20518	4.67927	1.61805	2.89192	0.00382893	0.0160199	0	0	0	0	0	0	0	0	0	1.632	0.794225	6.33883	26.9982	0	0	0	0	3.92993	protein_coding
ENSG00000143476	DTL	34.4236	4.67333	0.550473	8.48966	2.07247e-17	1.74099e-15	0	0.926896	3.55866	0	1.55393	6.25798	13.1374	0.841994	0	62.8319	88.1589	115.005	28.0366	49.0097	113.777	51.4175	57.6012	27.5095	protein_coding
ENSG00000077152	UBE2T	7.83561	4.67297	0.803214	5.81784	5.96131e-09	1.18729e-07	0	1.85379	0.889666	0	0.517977	0	0	1.68399	0	49.7759	14.296	17.2054	4.15357	3.0631	8.5333	7.76114	11.6574	19.6496	protein_coding
ENSG00000112655	PTK7	39.8126	4.66715	0.54653	8.53961	1.34677e-17	1.16387e-15	6.54425	2.78069	4.44833	2.04742	4.14382	1.56449	1.87678	1.68399	1.84476	102	37.3286	244.498	73.7259	6.12621	24.1777	77.6114	53.4868	70.7387	protein_coding
ENSG00000078900	TP73	3.48437	4.6636	1.4943	3.12092	0.00180286	0.00845853	0	0	0	0	0	0	0	1.68399	0	4.07999	19.8556	1.8111	34.267	1.02103	0	0	0	0	protein_coding
ENSG00000136378	ADAMTS7	3.4395	4.66044	1.18131	3.94516	7.97457e-05	0.000591949	1.09071	0	0	0	0.517977	0	0	0	0	8.97598	7.94225	0.905548	0	0	12.7999	0.970142	26.7434	1.96496	protein_coding
ENSG00000130208	APOC1	7.95688	4.65808	1.01997	4.5669	4.9499e-06	5.14386e-05	2.18142	0	0	0	0.517977	0.782247	0	0	1.84476	23.664	0	52.5218	1.03839	19.3997	4.26665	32.9848	2.05718	1.96496	protein_coding
ENSG00000158301	GPRASP2	4.4884	4.65561	1.07037	4.34954	1.36426e-05	0.000125624	0	0	0	0	0	1.56449	0	0.841994	0	6.52799	0.794225	20.8276	1.03839	4.08414	0	4.85071	6.85728	33.4044	protein_coding
ENSG00000166257	SCN3B	2.16111	4.65491	1.52508	3.05223	0.00227147	0.0102818	0	0	0	0	0	0	0	0	0	7.34399	2.38267	2.71664	20.7679	0	5.68887	0	0	0	protein_coding
ENSG00000093009	CDC45	11.5248	4.65329	0.694282	6.70229	2.05171e-11	6.48144e-10	0	0.926896	0	0	1.55393	0.782247	3.75356	1.68399	0	70.9919	22.2383	31.6942	6.23036	10.2103	15.6444	13.582	14.4003	13.7548	protein_coding
ENSG00000183723	CMTM4	4.23226	4.65304	0.954562	4.87453	1.09069e-06	1.35543e-05	0	0	0	0	1.55393	0	0	0	0	3.26399	4.76535	9.05548	12.4607	10.2103	2.84443	7.76114	0.685728	23.5796	protein_coding
ENSG00000211689	TARP	4.12392	4.65065	1.28192	3.62787	0.000285766	0.00178376	0	0	0	0	1.03595	0	0	0.841994	0	14.688	11.9134	0	21.8063	13.2735	0	10.6716	0	0	TR_C_gene
ENSG00000075218	GTSE1	12.5215	4.64179	0.714188	6.49939	8.0646e-11	2.30109e-09	0	0	0.889666	0	2.58989	3.12899	0	0.841994	0	53.0399	51.6246	24.4498	3.11518	15.3155	29.8665	15.5223	17.1432	7.85986	protein_coding
ENSG00000159200	RCAN1	160.161	4.64104	0.58455	7.9395	2.02993e-15	1.24588e-13	6.54425	15.7572	13.345	25.5928	7.25168	7.04023	5.63033	8.41994	21.2147	433.295	183.466	613.961	251.291	83.7248	2.84443	377.385	48.001	778.126	protein_coding
ENSG00000131016	AKAP12	153.28	4.63979	1.09422	4.24025	2.23267e-05	0.000192946	13.0885	12.0496	16.014	3.07113	9.84157	6.25798	33.782	10.1039	2.76714	158.304	341.517	0	2.07679	13.2735	5718.73	34.9251	1.37146	2075	protein_coding
ENSG00000106366	SERPINE1	12.186	4.63876	0.72274	6.4183	1.37809e-10	3.78144e-09	1.09071	0.926896	0.889666	1.02371	2.07191	0.782247	0	0.841994	0	5.71199	1.58845	14.4888	33.2286	32.6731	21.3332	34.9251	6.85728	60.9139	protein_coding
ENSG00000115850	LCT	2.11539	4.629	1.72731	2.67989	0.00736469	0.0272023	0	0	0	0	0	0	0	0	0	11.424	0	0	3.11518	5.10517	0	18.4327	0	0	protein_coding
ENSG00000141622	RNF165	23.225	4.61714	0.874474	5.2799	1.29253e-07	1.99137e-06	3.27212	2.78069	0.889666	0	4.14382	0.782247	3.75356	0.841994	0	2.448	23.0325	21.7331	77.8795	37.7783	1.42222	36.8654	0	200.426	protein_coding
ENSG00000227028	SLC8A1-AS1	2.66134	4.61455	1.06052	4.35123	1.35375e-05	0.000124962	0	0.926896	0	0	0	0	0	0	0	19.584	6.3538	1.8111	0	3.0631	1.42222	6.79099	2.05718	5.89489	lncRNA
ENSG00000079215	SLC1A3	2.11684	4.58537	1.19297	3.84367	0.000121208	0.000844192	0	0	0	0	0	0	0	0	0	0	7.14802	0.905548	0	3.0631	4.26665	4.85071	4.11437	13.7548	protein_coding
ENSG00000167889	MGAT5B	2.72209	4.58337	1.29332	3.54388	0.000394279	0.00234524	0	0	0	0	0	0	1.87678	0	0	4.89599	4.76535	1.8111	4.15357	0	25.5999	0	0	5.89489	protein_coding
ENSG00000129173	E2F8	3.22346	4.56125	0.884269	5.15822	2.49314e-07	3.56702e-06	0	0	0	0	0.517977	0.782247	0	0	0	3.26399	11.1191	8.14993	6.23036	4.08414	0	5.82085	8.22874	9.82482	protein_coding
ENSG00000092445	TYRO3	3.31933	4.55961	1.06596	4.27747	1.8903e-05	0.000166614	0	0	0	0	0.517977	0	0	0.841994	0	4.07999	3.1769	3.62219	15.5759	1.02103	14.2222	0.970142	0	15.7197	protein_coding
ENSG00000184661	CDCA2	8.5749	4.55873	0.74498	6.11926	9.4009e-10	2.20189e-08	2.18142	0	0	0	0.517977	2.34674	1.87678	0	0	25.2959	20.6498	35.3164	4.15357	15.3155	12.7999	10.6716	21.2576	1.96496	protein_coding
ENSG00000110492	MDK	18.4444	4.55581	0.631452	7.21481	5.40088e-13	2.2211e-11	2.18142	0	1.77933	1.02371	2.07191	1.56449	3.75356	0.841994	0.922379	895.966	78.6282	41.6552	53.9964	13.2735	18.4888	31.0445	2.05718	64.8438	protein_coding
ENSG00000233208	LINC00642	3.20261	4.553	1.28114	3.55387	0.000379608	0.00227055	0	0	0	0	0.517977	0	0	0.841994	0	22.848	0.794225	0.905548	25.9598	0	2.84443	0.970142	0	1.96496	lncRNA
ENSG00000170365	SMAD1	104.848	4.55283	0.734783	6.19616	5.7859e-10	1.40101e-08	7.63496	11.1227	9.78633	5.11855	3.62584	7.04023	13.1374	10.9459	9.22379	538.559	0	95.988	298.019	235.859	118.044	348.281	0	174.882	protein_coding
ENSG00000183722	LHFP	4.19757	4.5501	1.50651	3.02029	0.00252536	0.0112482	0	0.926896	1.77933	0	0	0	0	0	0	3.26399	0	11.7721	0	0	0	0	18.5147	39.2993	protein_coding
ENSG00000143842	SOX13	3.18509	4.5387	1.42183	3.19215	0.00141217	0.00688795	0	0.926896	0	0	0.517977	0	0	0	0	0	0.794225	0.905548	31.1518	0	11.3777	0	11.6574	0	protein_coding
ENSG00000145506	NKD2	11.7168	4.53538	1.05061	4.31689	1.58245e-05	0.000142572	1.09071	0.926896	0.889666	0	1.03595	0	0	0	4.6119	3.26399	0	0.905548	6.23036	12.2524	34.1332	31.0445	114.517	0	protein_coding
ENSG00000183018	SPNS2	5.6527	4.51331	0.902563	5.00055	5.71683e-07	7.57535e-06	0	0	1.77933	0	1.03595	0.782247	0	0	0	24.48	3.97112	5.43329	10.3839	32.6731	4.26665	11.6417	1.37146	3.92993	protein_coding
ENSG00000167513	CDT1	46.895	4.5105	0.422025	10.6878	1.16145e-26	3.17541e-24	7.63496	5.56137	0.889666	1.02371	7.76966	3.12899	3.75356	5.05196	0	106.08	106.426	155.754	41.5357	82.7038	69.6886	86.3426	123.431	37.3343	protein_coding
ENSG00000134690	CDCA8	21.5353	4.50494	0.500391	9.00284	2.19949e-19	2.46819e-17	2.18142	0	1.77933	1.02371	3.10786	2.34674	1.87678	1.68399	1.84476	69.3599	38.917	37.1275	9.34554	28.589	81.0663	44.6265	41.1437	21.6146	protein_coding
ENSG00000112212	TSPO2	3.96616	4.49686	1.2136	3.7054	0.00021106	0.0013739	1.09071	0	1.77933	0	0	0	0	0	0	37.5359	0.794225	3.62219	4.15357	0	4.26665	17.4626	0.685728	0	protein_coding
ENSG00000163132	MSX1	4.10751	4.49595	0.992896	4.52811	5.95128e-06	6.09186e-05	0	0	0	1.02371	0	0	0	1.68399	0	0.815998	3.1769	7.24438	3.11518	3.0631	24.1777	1.94028	4.11437	23.5796	protein_coding
ENSG00000166813	KIF7	2.51775	4.49397	1.16845	3.8461	0.000120014	0.000838983	0	0.926896	0	0	0	0	0	0	0	4.89599	0	0.905548	12.4607	2.04207	11.3777	4.85071	0	7.85986	protein_coding
ENSG00000170745	KCNS3	2.37237	4.4708	1.45885	3.0646	0.00217964	0.00992889	0	0	0	0	0.517977	0	0	0	0	8.15998	0	1.8111	0	0	1.42222	6.79099	24.0005	0	protein_coding
ENSG00000153721	CNKSR3	5.69056	4.46227	1.2765	3.49572	0.000472784	0.00271969	1.09071	0	0	2.04742	1.03595	0	0	0	0	2.448	8.73647	1.8111	1.03839	0	0	21.3431	0	62.8789	protein_coding
ENSG00000105717	PBX4	4.51835	4.45669	1.10823	4.02146	5.78386e-05	0.000446239	2.18142	0	0	0	1.03595	0	0	0	0	18.768	1.58845	0.905548	30.1134	1.02103	7.11108	4.85071	0	13.7548	protein_coding
ENSG00000183307	CECR6	5.64402	4.44431	1.05086	4.2292	2.3452e-05	0.000201398	0	0	0.889666	0	2.58989	0	0	0	0	7.34399	0	18.111	32.1902	2.04207	2.84443	1.94028	19.8861	13.7548	protein_coding
ENSG00000164050	PLXNB1	16.1263	4.44281	0.795639	5.58395	2.35121e-08	4.19397e-07	0	2.78069	0	0	0	0.782247	3.75356	1.68399	4.6119	102.816	46.8593	19.922	49.8429	9.18931	21.3332	0.970142	4.11437	21.6146	protein_coding
ENSG00000185198	PRSS57	85.4384	4.43932	0.919456	4.8282	1.37771e-06	1.668e-05	1.09071	2.78069	4.44833	1.02371	11.3955	7.04023	33.782	7.57795	0	9.79198	20.6498	76.9715	210.794	522.77	55.4664	531.638	1.37146	39.2993	protein_coding
ENSG00000241525	AC141424.1	1.86089	4.43621	1.82728	2.42777	0.0151919	0.0489537	0	0	0	0	0	0	0	0	0	0	0	3.62219	24.9214	0	4.26665	0	0.685728	0	lncRNA
ENSG00000177238	TRIM72	5.58452	4.42837	0.95293	4.64711	3.36623e-06	3.66132e-05	0	0.926896	0	0	0.517977	0	0	1.68399	0.922379	0	7.14802	5.43329	11.4223	2.04207	28.4443	5.82085	32.2292	3.92993	protein_coding
ENSG00000171320	ESCO2	8.1325	4.41359	0.730278	6.04371	1.50606e-09	3.3501e-08	0	0.926896	0.889666	0	0	2.34674	3.75356	0	0	6.52799	25.4152	24.4498	9.34554	5.10517	31.2888	12.6118	17.8289	5.89489	protein_coding
ENSG00000128833	MYO5C	36.1842	4.41175	0.456413	9.66614	4.19927e-22	7.34237e-20	3.27212	0.926896	3.55866	2.04742	2.07191	0.782247	7.50711	1.68399	9.22379	73.4399	40.5055	45.2774	153.682	38.7993	35.5554	109.626	48.6867	74.6687	protein_coding
ENSG00000004399	PLXND1	61.8589	4.41032	0.528418	8.34628	7.04461e-17	5.60475e-15	11.9978	1.85379	2.669	0	5.17977	0	5.63033	10.1039	12.9133	107.712	64.3322	96.8936	31.1518	183.786	42.6665	225.073	183.775	127.723	protein_coding
ENSG00000007171	NOS2	1.86857	4.41006	1.59045	2.77284	0.0055569	0.0216868	0	0	0	0	0	0	0	0	0	0	0	9.96102	0	1.02103	0	2.91043	2.05718	17.6847	protein_coding
ENSG00000183087	GAS6	1.81305	4.40912	1.42237	3.09985	0.00193616	0.00897474	0	0	0	0	0	0	0	0	0	0.815998	1.58845	4.52774	0	15.3155	0	9.70142	0.685728	0	protein_coding
ENSG00000227051	C14orf132	7.69422	4.4056	1.17164	3.7602	0.000169776	0.00113766	0	0	0.889666	1.02371	0	2.34674	0	1.68399	0	53.8559	7.94225	46.1829	2.07679	0	2.84443	0	0	19.6496	protein_coding
ENSG00000019144	PHLDB1	3.02678	4.40235	0.945359	4.6568	3.21163e-06	3.51735e-05	0	0	0	0	0	0	3.75356	0	0	4.07999	1.58845	7.24438	14.5375	4.08414	2.84443	11.6417	2.74291	1.96496	protein_coding
ENSG00000239887	C1orf226	1.85592	4.39965	1.59236	2.76298	0.00572762	0.0222204	0	0	0	0	0	0	0	0	0	4.07999	0.794225	0	0	3.0631	15.6444	0	0	9.82482	protein_coding
ENSG00000198400	NTRK1	1.83505	4.39829	1.64171	2.6791	0.00738205	0.0272402	0	0	0	0	0	0	0	0	0	0	8.73647	0.905548	0	0	18.4888	0.970142	0	3.92993	protein_coding
ENSG00000159723	AGRP	3.70583	4.39779	1.52108	2.89123	0.00383733	0.0160506	0	0	0	0	0	1.56449	0	0	0.922379	0	15.0903	14.4888	1.03839	0	0	0	33.6007	0	protein_coding
ENSG00000165507	C10orf10	11.7577	4.3904	0.868724	5.05385	4.33e-07	5.89233e-06	1.09071	3.70758	0.889666	1.02371	1.55393	0	0	0	0.922379	20.4	11.9134	21.7331	7.26875	4.08414	39.8221	2.91043	0	94.3183	protein_coding
ENSG00000259985	AC017100.1	2.90516	4.38282	1.11783	3.92081	8.82509e-05	0.000643876	0	0	0	0	0.517977	0	1.87678	0	0	10.608	1.58845	3.62219	3.11518	17.3576	0	11.6417	0	1.96496	lncRNA
ENSG00000119917	IFIT3	72.1564	4.38238	0.984195	4.45275	8.47762e-06	8.35373e-05	2.18142	3.70758	6.22766	13.3082	15.5393	10.1692	0	7.57795	0	62.0159	5.55957	14.4888	15.5759	531.959	581.687	10.6716	10.2859	7.85986	protein_coding
ENSG00000154133	ROBO4	4.72428	4.37921	1.10962	3.94658	7.9275e-05	0.000588962	0	1.85379	0	0	0	0	1.87678	0	0.922379	1.632	6.3538	9.05548	1.03839	20.4207	1.42222	39.7758	0.685728	0	protein_coding
ENSG00000260564	AL161912.2	2.26498	4.3736	1.6669	2.62379	0.0086958	0.0310886	0	0	0	0	0	0.782247	0	0	0	0	0	0.905548	29.075	6.12621	0	3.88057	0	0	lncRNA
ENSG00000256940	AP001453.2	5.57166	4.37212	0.894904	4.88557	1.03129e-06	1.2848e-05	0	1.85379	0	1.02371	0	1.56449	0	0	0	13.056	2.38267	1.8111	9.34554	29.61	5.68887	25.2237	4.8001	3.92993	lncRNA
ENSG00000163083	INHBB	1.76109	4.36737	1.37856	3.16805	0.00153463	0.00738676	0	0	0	0	0	0	0	0	0	0	14.296	0	3.11518	3.0631	5.68887	4.85071	0.685728	0	protein_coding
ENSG00000259113	AL118556.1	1.77398	4.36684	1.52834	2.85725	0.00427334	0.0175329	0	0	0	0	0	0	0	0	0	0	11.9134	8.14993	0	3.0631	0	2.91043	0	5.89489	lncRNA
ENSG00000163554	SPTA1	26.3803	4.36435	0.555675	7.85414	4.02514e-15	2.3643e-13	2.18142	2.78069	1.77933	4.09484	3.62584	3.91124	0	0.841994	1.84476	171.36	30.1805	49.8051	53.9964	6.12621	48.3554	46.5668	19.8861	27.5095	protein_coding
ENSG00000186187	ZNRF1	30.3241	4.36113	0.508566	8.57534	9.87923e-18	8.68737e-16	5.45354	0	0.889666	0	2.58989	1.56449	3.75356	5.05196	6.45665	48.1439	11.1191	64.2939	140.183	37.7783	44.0887	56.2682	65.1442	53.054	protein_coding
ENSG00000197935	NA_4	1.75448	4.34974	1.44187	3.01673	0.00255516	0.0113574	0	0	0	0	0	0	0	0	0	17.952	0	1.8111	0	1.02103	2.84443	0	2.05718	5.89489	protein_coding
ENSG00000219607	PPP1R3G	3.48654	4.34748	1.0986	3.95728	7.58068e-05	0.000565711	0	0	0	0	0.517977	0	0	0	1.84476	0	0.794225	4.52774	25.9598	4.08414	1.42222	1.94028	15.7717	5.89489	protein_coding
ENSG00000120327	PCDHB14	1.72348	4.34381	1.43888	3.01888	0.00253709	0.0112871	0	0	0	0	0	0	0	0	0	10.608	11.9134	4.52774	1.03839	0	0	0.970142	0	1.96496	protein_coding
ENSG00000051180	RAD51	12.8085	4.3423	0.686712	6.32332	2.55998e-10	6.67149e-09	0	0.926896	3.55866	0	1.03595	2.34674	3.75356	0	0	56.3039	28.5921	33.5053	4.15357	23.4838	9.95551	16.4924	42.5151	3.92993	protein_coding
ENSG00000138829	FBN2	2.76802	4.33989	1.48215	2.92811	0.0034103	0.0145766	0	0	0	1.02371	0.517977	0	0	0	0	21.216	8.73647	0	0	0	0	0	14.4003	3.92993	protein_coding
ENSG00000075618	FSCN1	90.7682	4.33898	0.370639	11.7067	1.17722e-31	5.71025e-29	4.36283	5.56137	8.89666	5.11855	8.28763	3.12899	18.7678	18.5239	6.45665	332.111	148.52	101.421	87.225	210.333	76.7997	202.76	232.462	163.092	protein_coding
ENSG00000198963	RORB	1.74903	4.3376	1.55254	2.79388	0.00520802	0.02056	0	0	0	0	0	0	0	0	0	0	4.76535	6.33883	0	0	17.0666	1.94028	1.37146	0	protein_coding
ENSG00000149927	DOC2A	5.84787	4.33492	1.17989	3.67401	0.00023877	0.00153108	0	0.926896	0	0	0	0	3.75356	1.68399	0	2.448	0	20.8276	42.5741	1.02103	0	7.76114	0.685728	23.5796	protein_coding
ENSG00000162267	ITIH3	1.72029	4.32941	1.58118	2.73809	0.0061797	0.0235609	0	0	0	0	0	0	0	0	0	16.32	4.76535	4.52774	0	0	1.42222	0	0	3.92993	protein_coding
ENSG00000186638	KIF24	2.19609	4.32576	1.06547	4.05997	4.908e-05	0.000386194	0	0	0	0	0.517977	0	0	0	0	13.056	0	3.62219	1.03839	5.10517	1.42222	4.85071	2.05718	7.85986	protein_coding
ENSG00000121211	MND1	16.0223	4.324	0.559535	7.72785	1.0938e-14	6.04689e-13	2.18142	0	0.889666	0	2.58989	3.12899	1.87678	0.841994	1.84476	59.5679	14.296	70.6327	13.4991	18.3786	17.0666	19.4028	28.8006	33.4044	protein_coding
ENSG00000157557	ETS2	541.934	4.31836	0.491025	8.79458	1.43583e-18	1.40198e-16	95.9823	28.7338	26.69	10.2371	17.6112	25.8142	18.7678	31.1538	210.302	815.182	2003.03	1058.59	864.982	466.613	603.02	863.426	569.154	2045.53	protein_coding
ENSG00000241911	TRBVB	1.77707	4.31439	1.36177	3.16821	0.0015338	0.00738512	0	0	0	0	0	0	0	0	0	0	0.794225	0	2.07679	1.02103	15.6444	1.94028	0.685728	9.82482	TR_V_pseudogene
ENSG00000090776	EFNB1	22.3781	4.31342	0.697016	6.18841	6.07742e-10	1.46687e-08	4.36283	0	0	1.02371	3.62584	0.782247	0	5.05196	3.68952	22.032	51.6246	76.066	78.9179	2.04207	76.7997	9.70142	6.17155	60.9139	protein_coding
ENSG00000123485	HJURP	20.5735	4.30733	0.627248	6.86702	6.55556e-12	2.22519e-10	4.36283	2.78069	1.77933	0	3.62584	3.12899	1.87678	0	0	81.5998	51.6246	38.033	4.15357	31.6521	68.2664	26.1938	47.3152	3.92993	protein_coding
ENSG00000133067	LGR6	3.48741	4.30399	1.08494	3.96704	7.27697e-05	0.000545755	0	0.926896	0.889666	0	0	0.782247	0	0	0	3.26399	0	24.4498	4.15357	2.04207	14.2222	10.6716	216.004	0	protein_coding
ENSG00000272168	CASC15	37.2589	4.30221	0.75242	5.71783	1.07892e-08	2.05884e-07	6.54425	1.85379	5.338	1.02371	1.03595	0.782247	13.1374	0.841994	3.68952	74.2558	19.8556	25.3553	414.319	32.6731	8.5333	21.3431	2.74291	37.3343	lncRNA
ENSG00000196754	S100A2	1.69704	4.29736	1.12459	3.82127	0.000132765	0.00091491	0	0	0	0	0	0	0	0	0	0	3.1769	3.62219	1.03839	1.02103	9.95551	2.91043	6.85728	1.96496	protein_coding
ENSG00000108176	DNAJC12	3.53551	4.29422	1.40342	3.05984	0.00221459	0.0100637	0	0	1.77933	0	0	0	1.87678	0	0	0.815998	0	0	0	31.6521	2.84443	11.6417	13.0288	0	protein_coding
ENSG00000111665	CDCA3	16.6974	4.29338	0.641246	6.69537	2.15133e-11	6.76768e-10	1.09071	0	2.669	2.04742	1.55393	0.782247	0	5.89396	0	86.4958	26.2094	36.2219	6.23036	29.61	18.4888	32.0147	47.3152	3.92993	protein_coding
ENSG00000186193	SAPCD2	7.80974	4.28732	0.80984	5.29404	1.19645e-07	1.86243e-06	0	0.926896	0.889666	1.02371	1.03595	0	0	0.841994	1.84476	49.7759	7.94225	14.4888	6.23036	16.3366	1.42222	9.70142	28.1148	0	protein_coding
ENSG00000175029	CTBP2	547.071	4.28089	0.429596	9.96494	2.1701e-23	4.4701e-21	49.0819	60.2482	23.1313	32.7587	83.9123	32.0721	105.1	56.4136	40.5847	81.5998	354.224	2268.4	1643.78	691.24	1489.06	1081.71	859.903	894.059	protein_coding
ENSG00000229418	AL136181.1	1.71895	4.27866	1.0982	3.89607	9.77673e-05	0.000704083	0	0	0	0	0	0	0	0	0	3.26399	3.97112	4.52774	1.03839	2.04207	1.42222	4.85071	0	9.82482	lncRNA
ENSG00000107281	NPDC1	27.8291	4.2743	0.844706	5.06011	4.19019e-07	5.72278e-06	3.27212	0.926896	2.669	1.02371	4.14382	0	9.38389	4.20997	0	56.3039	6.3538	16.2999	117.338	70.4514	5.68887	194.999	0	7.85986	protein_coding
ENSG00000211895	IGHA1	26.7075	4.27225	0.731497	5.84043	5.20673e-09	1.04671e-07	7.63496	0	0.889666	3.07113	1.03595	1.56449	1.87678	3.36798	4.6119	171.36	28.5921	141.265	19.7295	31.6521	0	30.0744	28.1148	5.89489	IG_C_gene
ENSG00000142156	COL6A1	2.1069	4.27092	1.09721	3.89252	9.92089e-05	0.000712511	0	0	0.889666	0	0	0	0	0	0	4.89599	2.38267	18.111	2.07679	2.04207	0	2.91043	0.685728	3.92993	protein_coding
ENSG00000241404	NA_77	10.2128	4.25832	0.769262	5.53559	3.10176e-08	5.36497e-07	1.09071	1.85379	0.889666	1.02371	1.03595	0	1.87678	1.68399	0	0.815998	6.3538	31.6942	74.7643	6.12621	15.6444	16.4924	4.8001	17.6847	protein_coding
ENSG00000178445	GLDC	1.66502	4.25656	1.32618	3.20963	0.00132906	0.00654604	0	0	0	0	0	0	0	0	0	2.448	4.76535	0.905548	0	1.02103	18.4888	0.970142	1.37146	0	protein_coding
ENSG00000233330	AL078581.1	3.08869	4.25572	1.06616	3.99165	6.56147e-05	0.000497804	0	0	0	0	1.55393	0	0	0	0	13.056	3.97112	2.71664	1.03839	11.2314	1.42222	16.4924	4.11437	0	lncRNA
ENSG00000196468	FGF16	1.63037	4.25092	1.39466	3.048	0.00230373	0.0104059	0	0	0	0	0	0	0	0	0	11.424	1.58845	3.62219	0	1.02103	0	7.76114	0	3.92993	protein_coding
ENSG00000229989	MIR181A1HG	48.3481	4.24952	0.59695	7.11872	1.08934e-12	4.25466e-11	7.63496	3.70758	8.007	2.04742	7.76966	4.69348	3.75356	0.841994	4.6119	0	140.578	81.4993	212.871	19.3997	100.977	91.1934	100.116	80.5635	lncRNA
ENSG00000157456	CCNB2	18.3027	4.24547	0.790255	5.37227	7.77512e-08	1.25579e-06	0	0.926896	0.889666	0	11.9135	0.782247	0	0	0	68.5439	31.769	30.7886	10.3839	29.61	66.8442	40.746	34.2864	1.96496	protein_coding
ENSG00000131142	CCL25	1.59386	4.23647	1.34135	3.15837	0.00158656	0.0075894	0	0	0	0	0	0	0	0	0	0	8.73647	3.62219	0	8.16828	1.42222	1.94028	4.8001	0	protein_coding
ENSG00000143545	RAB13	36.6813	4.22828	0.383348	11.0299	2.74311e-28	9.59259e-26	4.36283	1.85379	3.55866	2.04742	3.62584	2.34674	5.63033	1.68399	9.22379	35.9039	46.065	67.9161	116.3	46.9676	56.8887	118.357	72.6872	64.8438	protein_coding
ENSG00000137807	KIF23	6.07416	4.22698	0.801142	5.2762	1.31893e-07	2.02788e-06	0	0	0.889666	0	0.517977	1.56449	3.75356	0	0	22.032	11.9134	6.33883	4.15357	6.12621	34.1332	3.88057	6.17155	7.85986	protein_coding
ENSG00000253305	PCDHGB6	1.61787	4.22548	1.52621	2.76861	0.0056296	0.0219079	0	0	0	0	0	0	0	0	0	3.26399	4.76535	2.71664	4.15357	0	14.2222	0	0	0	protein_coding
ENSG00000144354	CDCA7	39.8428	4.22489	0.557144	7.58312	3.37331e-14	1.7079e-12	5.45354	2.78069	2.669	0	6.7337	7.04023	5.63033	5.05196	0.922379	227.664	115.163	60.6717	4.15357	34.7152	54.0442	60.1488	85.0303	39.2993	protein_coding
ENSG00000171729	TMEM51	4.81514	4.22379	1.30019	3.24859	0.00115979	0.00585815	0	0	0	0	0.517977	0.782247	0	0.841994	1.84476	1.632	0	0	11.4223	44.9255	1.42222	23.2834	0	0	protein_coding
ENSG00000223609	HBD	213.769	4.22268	0.969567	4.35522	1.32933e-05	0.000123629	10.9071	1.85379	125.443	18.4268	21.2371	7.04023	0	8.41994	1.84476	1796.83	255.74	281.625	177.565	42.8835	142.222	936.187	13.7146	5.89489	protein_coding
ENSG00000245954	LINC02273	49.8499	4.21732	1.04796	4.02431	5.71426e-05	0.000441301	2.18142	10.1959	10.676	5.11855	10.3595	3.12899	0	0.841994	2.76714	347.615	10.3249	47.0885	6.23036	13.2735	0	299.774	0	127.723	lncRNA
ENSG00000105711	SCN1B	50.7317	4.21683	0.520062	8.10831	5.13279e-16	3.64065e-14	2.18142	6.48827	1.77933	3.07113	4.66179	2.34674	9.38389	9.26193	8.30141	3.26399	126.282	177.487	80.9947	137.84	62.5775	44.6265	177.604	55.019	protein_coding
ENSG00000232807	AL137186.2	1.58434	4.21585	1.56435	2.69495	0.0070399	0.0262873	0	0	0	0	0	0	0	0	0	0	7.14802	0	0	14.2945	1.42222	2.91043	2.74291	0	lncRNA
ENSG00000203760	CENPW	26.5885	4.21511	0.495988	8.49841	1.92208e-17	1.62373e-15	2.18142	2.78069	2.669	5.11855	6.21573	3.91124	0	0	0	69.3599	90.5416	86.9326	13.4991	34.7152	38.3998	38.8057	50.0581	33.4044	protein_coding
ENSG00000109099	PMP22	2.62273	4.21301	1.57519	2.67461	0.00748162	0.0275338	1.09071	0	0	0	0	0	0	0.841994	0	1.632	0	0.905548	0	14.2945	28.4443	0	0	0	protein_coding
ENSG00000100526	CDKN3	11.9827	4.21162	0.669417	6.29148	3.1445e-10	8.02781e-09	3.27212	0.926896	0	0	0	5.47573	1.87678	0	0	38.3519	30.9748	30.7886	4.15357	26.5469	15.6444	25.2237	22.629	9.82482	protein_coding
ENSG00000131153	GINS2	15.2252	4.20711	0.578915	7.26723	3.66927e-13	1.58094e-11	0	2.78069	0	1.02371	3.10786	0	0	3.36798	2.76714	54.6719	38.917	47.0885	11.4223	29.61	27.0221	15.5223	30.8578	5.89489	protein_coding
ENSG00000196220	SRGAP3	31.0835	4.20642	1.09233	3.85086	0.000117702	0.000824739	7.63496	1.85379	6.22766	0	5.17977	0.782247	3.75356	3.36798	0	185.232	8.73647	38.033	281.405	5.10517	1.42222	2.91043	0	7.85986	protein_coding
ENSG00000269243	AC008894.2	4.09593	4.20193	1.19691	3.51066	0.000446999	0.00259518	0	0	0	2.04742	0	1.56449	0	0	0	0	0.794225	4.52774	6.23036	40.8414	0	11.6417	4.11437	1.96496	lncRNA
ENSG00000166793	YPEL4	3.34625	4.20059	1.08441	3.87361	0.000107237	0.000759191	0	0	0	0	0	0.782247	3.75356	0	0	25.2959	4.76535	2.71664	1.03839	2.04207	4.26665	11.6417	0	3.92993	protein_coding
ENSG00000011426	ANLN	8.33594	4.19999	0.64581	6.50344	7.85034e-11	2.25278e-09	2.18142	0.926896	0	1.02371	0	0	3.75356	0.841994	0.922379	19.584	27.7979	16.2999	4.15357	14.2945	17.0666	10.6716	8.91446	21.6146	protein_coding
ENSG00000171643	S100Z	28.8652	4.19861	0.78722	5.33346	9.63581e-08	1.53165e-06	1.09071	0	2.669	0	7.25168	0.782247	9.38389	1.68399	4.6119	14.688	23.0325	61.5772	24.9214	151.113	1.42222	170.745	1.37146	43.2292	protein_coding
ENSG00000166292	TMEM100	3.35993	4.19471	1.58962	2.63882	0.00831941	0.0300358	0	0	0	0	2.07191	0	0	0	0	8.97598	0	0	0	0	1.42222	0.970142	41.1437	5.89489	protein_coding
ENSG00000186810	CXCR3	4.16041	4.1937	0.954375	4.39418	1.11191e-05	0.000106022	1.09071	0	0.889666	1.02371	0	0	0	0	0.922379	7.34399	11.1191	0	4.15357	13.2735	0	5.82085	9.60019	19.6496	protein_coding
ENSG00000164867	NOS3	2.51273	4.19281	1.1347	3.6951	0.0002198	0.00142156	0	0	0.889666	1.02371	0	0	0	0	0	7.34399	1.58845	4.52774	0	2.04207	0	1.94028	21.9433	3.92993	protein_coding
ENSG00000180712	LINC02363	30.0753	4.19128	0.828727	5.05749	4.24816e-07	5.79144e-06	1.09071	2.78069	0	0	4.14382	0.782247	15.0142	5.05196	0.922379	14.688	54.0073	168.432	49.8429	5.10517	0	7.76114	164.575	47.1591	lncRNA
ENSG00000145386	CCNA2	13.1591	4.18815	0.658426	6.36086	2.00631e-10	5.3873e-09	0	2.78069	2.669	0	2.58989	0	0	3.36798	0	44.0639	16.6787	29.8831	2.07679	29.61	14.2222	35.8953	43.2009	9.82482	protein_coding
ENSG00000099282	TSPAN15	2.59463	4.18731	1.33093	3.14614	0.0016544	0.00786505	0	0	0	1.02371	0.517977	0	0	0	0	1.632	0	0	1.03839	15.3155	0	2.91043	0.685728	23.5796	protein_coding
ENSG00000171241	SHCBP1	12.9475	4.18579	0.597883	7.00102	2.54099e-12	9.2292e-11	3.27212	0	2.669	3.07113	0.517977	1.56449	1.87678	0	0	19.584	62.7438	36.2219	14.5375	9.18931	29.8665	12.6118	13.7146	21.6146	protein_coding
ENSG00000226674	TEX41	2.94782	4.18349	1.4832	2.82059	0.0047936	0.0192217	0	0	0	0	1.55393	0	0	0	0	0	2.38267	14.4888	2.07679	0	28.4443	0	4.11437	0	lncRNA
ENSG00000124216	SNAI1	14.9594	4.17752	1.03459	4.03785	5.39438e-05	0.000419554	4.36283	0.926896	0.889666	5.11855	1.03595	0.782247	0	0	0.922379	0.815998	3.1769	21.7331	4.15357	1.02103	186.31	0	0.685728	37.3343	protein_coding
ENSG00000139998	RAB15	22.4869	4.16095	0.769872	5.40473	6.49056e-08	1.05626e-06	5.45354	0	4.44833	1.02371	1.03595	0	7.50711	3.36798	0	181.152	54.8015	44.3718	34.267	5.10517	17.0666	9.70142	2.05718	33.4044	protein_coding
ENSG00000112077	RHAG	2.96675	4.15894	1.25341	3.31809	0.000906338	0.00473215	0	0	0	1.02371	1.03595	0	0	0	0	27.7439	3.1769	4.52774	0	1.02103	7.11108	7.76114	0	0	protein_coding
ENSG00000102996	MMP15	1.52048	4.15654	1.62152	2.56335	0.0103667	0.0359487	0	0	0	0	0	0	0	0	0	16.32	0	0	5.19197	2.04207	2.84443	0.970142	0	0	protein_coding
ENSG00000039560	RAI14	18.5718	4.15421	0.679148	6.1168	9.5474e-10	2.23226e-08	3.27212	1.85379	0	0	2.58989	4.69348	0	0.841994	3.68952	31.8239	18.2672	55.2384	4.15357	23.4838	24.1777	79.5517	2.05718	78.5986	protein_coding
ENSG00000227234	SPANXB1	3.69751	4.14747	1.31634	3.15075	0.0016285	0.00775664	1.09071	0.926896	0	0	1.03595	0	0	0	0	1.632	0	9.05548	0	0	19.911	0	3.42864	29.4745	protein_coding
ENSG00000167693	NXN	22.8455	4.14547	0.952883	4.35045	1.3586e-05	0.000125179	0	4.63448	0.889666	3.07113	2.07191	0.782247	3.75356	4.20997	2.76714	5.71199	0	3.62219	181.719	0	41.2443	143.581	1.37146	11.7898	protein_coding
ENSG00000173894	CBX2	14.9019	4.14316	0.735445	5.63354	1.76545e-08	3.22958e-07	0	0	0	1.02371	3.62584	0.782247	11.2607	0	0	101.184	22.2383	9.05548	20.7679	24.5048	19.911	25.2237	10.9716	17.6847	protein_coding
ENSG00000245648	AC022075.1	4.88304	4.14208	1.20082	3.44939	0.000561857	0.00314544	3.27212	0	0	0	0.517977	0	0	0.841994	0	0	14.296	5.43329	2.07679	0	44.0887	0	7.54301	9.82482	lncRNA
ENSG00000121005	CRISPLD1	1.89363	4.13725	1.27711	3.23954	0.00119722	0.00600084	0	0	0	0	0.517977	0	0	0	0	14.688	1.58845	3.62219	0	3.0631	2.84443	7.76114	0	0	protein_coding
ENSG00000168078	PBK	1.90706	4.13471	1.05332	3.92541	8.65831e-05	0.000633861	0	0	0	1.02371	0	0	0	0	0	5.71199	6.3538	0.905548	0	1.02103	4.26665	4.85071	8.22874	1.96496	protein_coding
ENSG00000142089	IFITM3	488.237	4.13417	0.554354	7.45763	8.80936e-14	4.13957e-12	42.5376	28.7338	26.69	11.2608	110.329	16.4272	69.4408	27.7858	140.202	186.048	367.726	780.582	1061.24	3359.2	143.644	1479.47	620.584	316.359	protein_coding
ENSG00000169439	SDC2	2.56919	4.13387	1.21457	3.40358	0.000665094	0.00362619	1.09071	0.926896	0	0	0	0	0	0	0	277.439	6.3538	0	1.03839	0	11.3777	0.970142	2.05718	21.6146	protein_coding
ENSG00000102098	SCML2	11.0711	4.12889	0.629492	6.55909	5.41388e-11	1.58691e-09	0	0	0.889666	1.02371	3.10786	0.782247	1.87678	1.68399	0.922379	44.0639	25.4152	36.2219	20.7679	6.12621	4.26665	24.2536	8.22874	19.6496	protein_coding
ENSG00000085999	RAD54L	1.89589	4.12588	1.11431	3.70263	0.000213377	0.00138658	0	0	0	0	0	0.782247	0	0	0	15.504	2.38267	2.71664	1.03839	2.04207	2.84443	4.85071	0	1.96496	protein_coding
ENSG00000239998	LILRA2	83.9749	4.12485	0.469396	8.78757	1.52825e-18	1.4826e-16	5.45354	1.85379	11.5657	2.04742	20.7191	6.25798	5.63033	11.7879	14.7581	255.407	135.812	101.421	179.642	115.377	12.7999	157.163	167.318	306.534	protein_coding
ENSG00000141655	TNFRSF11A	1.86442	4.12171	1.16215	3.54664	0.000390181	0.00232362	0	0	0	0	0.517977	0	0	0	0	13.056	0.794225	7.24438	0	5.10517	2.84443	1.94028	2.05718	0	protein_coding
ENSG00000167123	CERCAM	4.77378	4.11946	0.859445	4.79316	1.64172e-06	1.94229e-05	0	2.78069	0	0	0	0	1.87678	0.841994	0	6.52799	7.94225	11.7721	12.4607	6.12621	0	7.76114	21.9433	5.89489	protein_coding
ENSG00000023171	GRAMD1B	14.4202	4.11608	0.642811	6.40325	1.52108e-10	4.15109e-09	4.36283	0	0.889666	1.02371	1.55393	1.56449	0	1.68399	2.76714	65.2799	7.14802	6.33883	62.3036	30.631	39.8221	13.582	6.85728	13.7548	protein_coding
ENSG00000269416	LINC01224	5.59021	4.11423	1.3813	2.97852	0.00289645	0.012661	0	2.78069	0	0	0	0.782247	0	1.68399	0	70.9919	3.1769	9.96102	0	0	1.42222	0	0	9.82482	lncRNA
ENSG00000231652	AL590428.1	1.50618	4.10425	1.37116	2.99326	0.00276015	0.01215	0	0	0	0	0	0	0	0	0	0	0.794225	6.33883	4.15357	4.08414	0	3.88057	0	7.85986	lncRNA
ENSG00000035499	DEPDC1B	3.73612	4.09389	0.906062	4.51833	6.23292e-06	6.35419e-05	2.18142	0	0	0	0.517977	0	1.87678	0	0	26.1119	3.1769	4.52774	2.07679	3.0631	4.26665	6.79099	4.8001	7.85986	protein_coding
ENSG00000111452	ADGRD1	1.95391	4.09001	1.03886	3.93701	8.25024e-05	0.000609326	0	0	0.889666	0	0	0	0	0	0	0.815998	4.76535	0.905548	2.07679	4.08414	1.42222	0.970142	5.48582	13.7548	protein_coding
ENSG00000233154	LINC01762	1.44964	4.08892	1.19813	3.41275	0.000643117	0.00352297	0	0	0	0	0	0	0	0	0	3.26399	4.76535	0.905548	7.26875	5.10517	2.84443	1.94028	0	0	lncRNA
ENSG00000092853	CLSPN	40.8021	4.08488	0.520212	7.85233	4.08367e-15	2.38934e-13	3.27212	0.926896	4.44833	2.04742	6.21573	9.38697	5.63033	6.73595	1.84476	19.584	280.361	90.5548	36.3438	34.7152	61.1553	26.1938	64.4584	80.5635	protein_coding
ENSG00000137959	IFI44L	175.414	4.0818	0.982078	4.15629	3.23459e-05	0.000267981	27.2677	0.926896	16.9037	28.6639	44.546	33.6366	0	15.1559	8.30141	13.056	4.76535	27.1664	820.331	1156.83	822.041	11.6417	10.2859	115.933	protein_coding
ENSG00000106853	PTGR1	1.87612	4.07772	1.13723	3.58567	0.000336217	0.00205516	0	0	0	0	0	0.782247	0	0	0	0	2.38267	9.05548	2.07679	3.0631	5.68887	6.79099	0	3.92993	protein_coding
ENSG00000139292	LGR5	1.42639	4.06629	1.60606	2.53184	0.0113467	0.0385992	0	0	0	0	0	0	0	0	0	1.632	8.73647	0.905548	12.4607	0	108.088	1.94028	0	0	protein_coding
ENSG00000148426	PROSER2	4.03865	4.06225	0.904369	4.4918	7.06237e-06	7.10347e-05	0	0	0	0	1.55393	0.782247	0	0.841994	0	4.07999	18.2672	6.33883	9.34554	5.10517	14.2222	0	8.22874	3.92993	protein_coding
ENSG00000127533	F2RL3	17.6418	4.06172	0.99194	4.09472	4.22684e-05	0.000337362	7.63496	0	0.889666	0	2.58989	0.782247	3.75356	0.841994	1.84476	0	92.1301	5.43329	14.5375	0	155.022	0.970142	7.54301	23.5796	protein_coding
ENSG00000176956	LY6H	1.45734	4.05994	1.56023	2.60214	0.00926442	0.0327632	0	0	0	0	0	0	0	0	0	4.07999	0	2.71664	0	0	2.84443	8.73128	0	7.85986	protein_coding
ENSG00000073712	FERMT2	2.42055	4.05616	1.16866	3.47077	0.000518967	0.00294018	0	0	0.889666	0	0	0.782247	0	0	0	3.26399	7.14802	2.71664	1.03839	0	7.11108	0.970142	0	19.6496	protein_coding
ENSG00000198467	TPM2	55.3713	4.05525	0.384476	10.5475	5.21912e-26	1.24571e-23	14.1792	3.70758	4.44833	1.02371	4.66179	3.91124	13.1374	10.1039	3.68952	105.264	73.0687	54.3329	153.682	168.471	61.1553	95.0739	61.7155	165.057	protein_coding
ENSG00000133742	CA1	13.7028	4.05242	0.888652	4.56018	5.11093e-06	5.29291e-05	2.18142	0	5.338	5.11855	0.517977	0	0	0	0.922379	102.816	8.73647	17.2054	9.34554	4.08414	11.3777	75.6711	1.37146	1.96496	protein_coding
ENSG00000005189	LOC81691	5.82529	4.04863	0.803447	5.03907	4.67789e-07	6.32567e-06	1.09071	0.926896	0	0	1.03595	0.782247	0	0.841994	0.922379	10.608	20.6498	13.5832	1.03839	23.4838	5.68887	19.4028	4.8001	0	protein_coding
ENSG00000151725	CENPU	39.5877	4.04712	0.455402	8.88693	6.28196e-19	6.51461e-17	6.54425	0.926896	8.007	1.02371	3.10786	4.69348	7.50711	4.20997	5.53427	31.0079	157.256	74.2549	25.9598	53.0938	159.288	34.9251	50.7439	84.4935	protein_coding
ENSG00000164056	SPRY1	162.71	4.04581	0.541615	7.46989	8.02602e-14	3.83134e-12	15.2699	25.0262	19.5727	5.11855	10.8775	17.9917	39.4123	16.8399	18.4476	30.1919	257.329	77.8771	208.717	26.5469	502.042	150.372	599.326	907.814	protein_coding
ENSG00000118193	KIF14	12.7447	4.04579	0.542888	7.45236	9.16848e-14	4.29491e-12	2.18142	0	0	2.04742	1.03595	4.69348	0	0	2.76714	15.504	43.6824	25.3553	18.6911	18.3786	22.7555	21.3431	41.1437	9.82482	protein_coding
ENSG00000266074	BAHCC1	103.922	4.04566	0.43517	9.29673	1.44836e-20	2.01658e-18	10.9071	10.1959	0.889666	14.3319	20.2011	12.516	24.3981	10.1039	4.6119	469.199	65.1264	243.592	290.75	156.218	56.8887	155.223	187.889	137.548	protein_coding
ENSG00000133878	DUSP26	3.97686	4.04334	1.14315	3.53703	0.000404661	0.0023925	0	0	0.889666	0	1.55393	0	1.87678	0	0	35.0879	1.58845	13.5832	0	1.02103	4.26665	5.82085	0	5.89489	protein_coding
ENSG00000142731	PLK4	4.0419	4.03629	0.925869	4.35947	1.30381e-05	0.000121697	0	0	0	0	1.03595	2.34674	0	0	0	16.32	19.8556	3.62219	4.15357	3.0631	11.3777	0.970142	4.11437	5.89489	protein_coding
ENSG00000261326	LINC01355	2.74245	4.03556	1.12877	3.5752	0.000349964	0.00212317	0	0	0	0	1.03595	0	0	0	0.922379	22.032	0.794225	0.905548	0	9.18931	1.42222	7.76114	1.37146	3.92993	lncRNA
ENSG00000197077	KIAA1671	2.83462	4.02521	0.95308	4.22337	2.40675e-05	0.000205627	0	0.926896	0	0	0.517977	0	0	0	0.922379	13.872	2.38267	0.905548	2.07679	2.04207	14.2222	7.76114	3.42864	1.96496	protein_coding
ENSG00000198208	RPS6KL1	1.37957	4.02355	1.36714	2.94305	0.00325	0.0139709	0	0	0	0	0	0	0	0	0	0	1.58845	3.62219	0	1.02103	4.26665	6.79099	7.54301	0	protein_coding
ENSG00000253755	IGHGP	1.38496	4.01937	1.27244	3.15879	0.00158424	0.00758429	0	0	0	0	0	0	0	0	0	10.608	0.794225	4.52774	0	2.04207	0	0.970142	2.05718	3.92993	IG_C_pseudogene
ENSG00000115457	IGFBP2	8.43303	4.00986	0.809402	4.9541	7.26664e-07	9.34718e-06	1.09071	1.85379	0.889666	0	1.03595	0	0	0	3.68952	20.4	2.38267	3.62219	1.03839	40.8414	14.2222	29.1043	4.11437	27.5095	protein_coding
ENSG00000040608	RTN4R	7.94579	4.00631	0.799753	5.00944	5.45893e-07	7.27067e-06	0	0	0.889666	0	1.55393	0	5.63033	1.68399	0	41.6159	9.5307	3.62219	39.4589	11.2314	2.84443	13.582	5.48582	5.89489	protein_coding
ENSG00000226742	HSBP1L1	13.5573	3.99835	0.81189	4.92474	8.44735e-07	1.07373e-05	2.18142	0	1.77933	2.04742	1.55393	0	7.50711	0.841994	0	8.15998	2.38267	10.8666	15.5759	10.2103	139.377	30.0744	7.54301	3.92993	protein_coding
ENSG00000123685	BATF3	9.68759	3.99748	0.997279	4.00839	6.11351e-05	0.00046783	4.36283	0	0.889666	2.04742	0	0	1.87678	1.68399	0	1.632	0	12.6777	4.15357	116.398	12.7999	3.88057	4.11437	7.85986	protein_coding
ENSG00000072571	HMMR	8.51789	3.99741	0.594551	6.72342	1.77514e-11	5.6793e-10	2.18142	0.926896	0	0	0.517977	2.34674	1.87678	0	1.84476	14.688	15.8845	32.5997	9.34554	13.2735	19.911	20.373	11.6574	5.89489	protein_coding
ENSG00000142910	TINAGL1	2.88249	3.99552	1.15646	3.45494	0.000550416	0.00309521	0	0	0	0	0	0.782247	0	1.68399	0	2.448	3.1769	2.71664	0	6.12621	28.4443	5.82085	0.685728	0	protein_coding
ENSG00000196730	DAPK1	15.3028	3.99254	0.625684	6.38107	1.75849e-10	4.7473e-09	2.18142	0	1.77933	2.04742	4.14382	1.56449	0	2.52598	0.922379	26.9279	56.39	8.14993	87.225	6.12621	11.3777	18.4327	10.2859	35.3694	protein_coding
ENSG00000176076	KCNE5	2.16371	3.9923	1.42877	2.79422	0.00520255	0.0205546	0	0	0	0	1.03595	0	0	0	0	0	0	11.7721	2.07679	13.2735	0	8.73128	2.05718	0	protein_coding
ENSG00000175899	A2M	1.75097	3.9849	1.09585	3.63634	0.000276534	0.0017326	0	0.926896	0	0	0	0	0	0	0	1.632	3.97112	9.05548	0	2.04207	0	3.88057	4.11437	5.89489	protein_coding
ENSG00000205476	CCDC85C	5.01933	3.98423	0.898959	4.43206	9.33391e-06	9.09029e-05	0	0.926896	0	2.04742	0.517977	0	0	0	1.84476	11.424	8.73647	21.7331	4.15357	3.0631	0	5.82085	28.1148	1.96496	protein_coding
ENSG00000154839	SKA1	11.5837	3.97992	0.591719	6.72602	1.74362e-11	5.59036e-10	1.09071	2.78069	1.77933	1.02371	0.517977	3.12899	0	1.68399	0	36.7199	14.296	26.2609	2.07679	20.4207	18.4888	11.6417	39.0865	27.5095	protein_coding
ENSG00000002586	CD99	339.466	3.9773	0.462126	8.60653	7.53036e-18	6.66082e-16	50.1726	18.5379	32.028	59.3752	41.4382	13.2982	46.9194	53.8876	49.8085	817.63	653.647	313.319	265.829	1146.62	18.4888	1101.11	856.474	571.805	protein_coding
ENSG00000205978	NYNRIN	1.75606	3.97169	1.32539	2.99662	0.00272988	0.0120379	0	0	0	0	0	0	0	0	0.922379	0	0	4.52774	7.26875	2.04207	14.2222	1.94028	0.685728	0	protein_coding
ENSG00000053524	MCF2L2	3.08755	3.96764	1.26376	3.13955	0.00169205	0.00802377	1.09071	0	0	0	1.55393	0	0	0	0	1.632	3.97112	0	28.0366	3.0631	11.3777	4.85071	0	0	protein_coding
ENSG00000153885	KCTD15	11.508	3.96421	0.7251	5.46712	4.57398e-08	7.66766e-07	0	0	0.889666	6.14226	1.03595	0.782247	0	2.52598	0.922379	39.1679	22.2383	35.3164	29.075	5.10517	11.3777	0	32.9149	19.6496	protein_coding
ENSG00000077935	SMC1B	3.33791	3.96189	1.26213	3.13906	0.00169492	0.00803483	0	0	0.889666	0	0.517977	1.56449	0	0	0	8.15998	0	10.8666	4.15357	0	28.4443	0	5.48582	0	protein_coding
ENSG00000198722	UNC13B	3.34685	3.95811	1.27041	3.11562	0.00183558	0.00857459	1.09071	0	0	2.04742	0.517977	0	0	0	0	15.504	0	3.62219	21.8063	0	0	1.94028	13.7146	0	protein_coding
ENSG00000139971	C14orf37	1.36911	3.9579	1.25956	3.14229	0.00167634	0.00795679	0	0	0	0	0	0	0	0	0	3.26399	0.794225	6.33883	3.11518	0	4.26665	0.970142	0	5.89489	protein_coding
ENSG00000105383	CD33	26.7822	3.95538	0.794784	4.97668	6.46855e-07	8.47279e-06	4.36283	2.78069	1.77933	1.02371	8.28763	0.782247	1.87678	5.89396	1.84476	3.26399	3.97112	9.96102	97.609	150.092	0	94.1038	90.5161	3.92993	protein_coding
ENSG00000100116	GCAT	5.78162	3.94777	0.831013	4.75055	2.02862e-06	2.34469e-05	0	4.63448	0	1.02371	0.517977	0	0	0	0	1.632	9.5307	5.43329	13.4991	16.3366	11.3777	30.0744	4.11437	5.89489	protein_coding
ENSG00000167994	RAB3IL1	1.66174	3.94648	1.29831	3.03971	0.00236807	0.0106549	0	0	0	0	0.517977	0	0	0	0	8.97598	0	9.05548	2.07679	2.04207	1.42222	5.82085	0	0	protein_coding
ENSG00000069869	NEDD4	10.5725	3.94351	0.766433	5.14527	2.6713e-07	3.79305e-06	4.36283	0	0	0	1.03595	0	3.75356	3.36798	0	2.448	22.2383	19.0165	31.1518	18.3786	21.3332	27.164	0.685728	35.3694	protein_coding
ENSG00000157985	AGAP1	2.17831	3.94146	1.51256	2.60582	0.00916548	0.0324668	0	0	0	0	0	1.56449	0	0	0	0.815998	0	0	4.15357	0	27.0221	2.91043	2.74291	0	protein_coding
ENSG00000169242	EFNA1	10.7233	3.93828	0.881837	4.46599	7.96982e-06	7.89995e-05	2.18142	0.926896	1.77933	1.02371	1.55393	0	1.87678	0	2.76714	111.792	1.58845	5.43329	4.15357	10.2103	15.6444	26.1938	0	5.89489	protein_coding
ENSG00000254122	PCDHGB7	1.34315	3.93762	1.57818	2.49505	0.012594	0.0419624	0	0	0	0	0	0	0	0	0	0	2.38267	2.71664	5.19197	0	9.95551	0	0	3.92993	protein_coding
ENSG00000184584	TMEM173	87.3504	3.93653	0.534876	7.3597	1.84324e-13	8.27367e-12	22.9049	5.56137	8.007	2.04742	24.8629	7.82247	3.75356	10.9459	9.22379	34.2719	63.538	142.171	237.792	359.404	19.911	169.775	387.436	62.8789	protein_coding
ENSG00000198369	SPRED2	4.51088	3.93561	1.18209	3.32937	0.000870417	0.00456999	0	0.926896	0	0	0	0	1.87678	0	2.76714	0	13.5018	0.905548	2.07679	0	44.0887	5.82085	1.37146	7.85986	protein_coding
ENSG00000184979	USP18	14.1817	3.93287	0.804891	4.88621	1.02796e-06	1.28277e-05	1.09071	3.70758	0.889666	1.02371	1.03595	4.69348	0	0	2.76714	2.448	3.1769	8.14993	75.8027	56.1569	76.7997	1.94028	11.6574	3.92993	protein_coding
ENSG00000145936	KCNMB1	11.1828	3.92371	0.799902	4.90523	9.33162e-07	1.17422e-05	1.09071	0	0	1.02371	1.55393	0	1.87678	3.36798	3.68952	2.448	19.8556	6.33883	10.3839	98.0193	4.26665	14.5521	30.8578	1.96496	protein_coding
ENSG00000167291	TBC1D16	80.5208	3.92321	0.656176	5.9789	2.24651e-09	4.7916e-08	11.9978	6.48827	9.78633	1.02371	4.66179	6.25798	11.2607	3.36798	35.0504	39.9839	46.8593	55.2384	211.832	9.18931	503.465	9.70142	259.205	224.006	protein_coding
ENSG00000148737	TCF7L2	186.864	3.92156	0.518957	7.55661	4.13715e-14	2.08061e-12	29.4491	9.26896	32.028	7.16597	23.8269	8.60472	52.5498	19.3659	27.6714	47.3279	256.535	184.732	96.5706	122.524	1348.26	195.969	506.753	394.958	protein_coding
ENSG00000266302	AC098850.3	11.636	3.9136	1.47169	2.65926	0.00783133	0.0286102	0	0	0	0	0	0	0	10.1039	2.76714	0	3.1769	27.1664	16.6143	39.8204	0	3.88057	98.0591	7.85986	protein_coding
ENSG00000264659	AC064805.2	2.15216	3.91218	1.57747	2.48004	0.0131368	0.043415	0	0	0	0	0.517977	0	1.87678	0	0	0	0	5.43329	25.9598	1.02103	0	0	0	3.92993	lncRNA
ENSG00000258498	DIO3OS	2.05466	3.91027	1.49963	2.60749	0.009121	0.0323637	0	0	0	0	1.03595	0	0	0	0	21.216	2.38267	5.43329	0	1.02103	0	0	0	5.89489	lncRNA
ENSG00000161638	ITGA5	69.3001	3.91016	0.42774	9.14144	6.1629e-20	7.59603e-18	10.9071	2.78069	4.44833	3.07113	16.0573	1.56449	22.5213	9.26193	9.22379	102.816	58.7726	125.871	89.3018	252.196	115.2	260.968	87.7732	74.6687	protein_coding
ENSG00000134321	RSAD2	24.6381	3.9066	0.734155	5.32122	1.03076e-07	1.62811e-06	4.36283	1.85379	6.22766	3.07113	6.21573	1.56449	0	0.841994	2.76714	24.48	3.1769	13.5832	16.6143	187.87	143.644	14.5521	4.8001	7.85986	protein_coding
ENSG00000113758	DBN1	51.5138	3.90526	0.523536	7.45938	8.69292e-14	4.09766e-12	2.18142	3.70758	2.669	1.02371	10.3595	7.82247	18.7678	10.1039	2.76714	215.424	98.4839	58.8606	184.834	17.3576	79.6441	15.5223	85.716	112.003	protein_coding
ENSG00000166897	ELFN2	27.0194	3.90325	0.70197	5.56042	2.69125e-08	4.7246e-07	5.45354	11.1227	3.55866	1.02371	2.58989	0.782247	3.75356	2.52598	0	164.016	46.8593	38.033	7.26875	44.9255	15.6444	110.596	0.685728	27.5095	protein_coding
ENSG00000140451	PIF1	8.3473	3.90187	0.678878	5.74752	9.05611e-09	1.74362e-07	0	0.926896	0.889666	1.02371	1.03595	2.34674	0	0	2.76714	27.7439	5.55957	19.922	2.07679	25.5259	9.95551	18.4327	28.1148	3.92993	protein_coding
ENSG00000172738	TMEM217	34.8561	3.88422	0.671331	5.78585	7.21466e-09	1.41813e-07	1.09071	1.85379	2.669	1.02371	3.10786	0	31.9052	1.68399	0.922379	36.7199	38.917	69.7272	95.5322	70.4514	81.0663	134.85	4.8001	51.0891	protein_coding
ENSG00000237015	AL031186.1	1.59564	3.88317	1.36666	2.84137	0.00449201	0.0182508	0	0	0	0	0.517977	0	0	0	0	0.815998	4.76535	0.905548	1.03839	6.12621	0	14.5521	0	0	lncRNA
ENSG00000138080	EMILIN1	22.115	3.881	0.840943	4.61506	3.92988e-06	4.19401e-05	2.18142	0.926896	0.889666	1.02371	4.14382	0	9.38389	5.89396	1.84476	22.848	12.7076	71.5383	0	71.4724	0	11.6417	163.889	17.6847	protein_coding
ENSG00000123094	RASSF8	1.67157	3.87818	1.3965	2.77706	0.00548532	0.0214743	0	0	0.889666	0	0	0	0	0	0	0.815998	0	0.905548	0	1.02103	12.7999	7.76114	0	5.89489	protein_coding
ENSG00000127507	ADGRE2	37.8794	3.87555	0.720419	5.37958	7.46585e-08	1.20714e-06	8.72566	5.56137	0.889666	2.04742	5.17977	9.38697	7.50711	0	4.6119	0.815998	17.4729	69.7272	224.293	49.0097	29.8665	154.253	90.5161	1.96496	protein_coding
ENSG00000237429	BX293535.1	5.03588	3.8727	0.93742	4.13124	3.60816e-05	0.00029423	1.09071	0	0.889666	1.02371	1.55393	0	0	0.841994	0	22.032	0	5.43329	4.15357	6.12621	0	22.3133	21.2576	3.92993	lncRNA
ENSG00000117724	CENPF	134.167	3.87135	0.370239	10.4563	1.37044e-25	3.07572e-23	22.9049	11.1227	11.5657	15.3557	33.1505	23.4674	18.7678	12.6299	4.6119	139.536	324.838	249.931	122.53	114.356	556.087	275.52	346.978	131.653	protein_coding
ENSG00000211697	TRGV5	2.55536	3.87034	0.966371	4.00503	6.20097e-05	0.00047308	0	0	0	1.02371	1.03595	0	0	0	0	3.26399	3.97112	8.14993	0	1.02103	5.68887	3.88057	6.17155	11.7898	TR_V_gene
ENSG00000173848	NET1	28.4434	3.86141	0.526356	7.33613	2.1986e-13	9.75229e-12	6.54425	5.56137	5.338	1.02371	3.10786	4.69348	5.63033	1.68399	0	48.9599	61.1553	35.3164	5.19197	45.9466	68.2664	144.551	19.8861	49.1241	protein_coding
ENSG00000101004	NINL	2.99771	3.85377	1.18251	3.25898	0.00111813	0.00567636	1.09071	0	0	0	1.03595	0.782247	0	0	0	20.4	2.38267	4.52774	0	0	17.0666	0	2.74291	3.92993	protein_coding
ENSG00000265369	PCAT18	1.2746	3.85253	1.48191	2.5997	0.00933049	0.0329397	0	0	0	0	0	0	0	0	0	0.815998	0	0.905548	8.30715	4.08414	0	0.970142	0	7.85986	lncRNA
ENSG00000234084	AL049552.1	1.23144	3.85058	1.56299	2.46359	0.0137552	0.0450722	0	0	0	0	0	0	0	0	0	4.07999	0	7.24438	1.03839	0	5.68887	0	4.11437	0	lncRNA
ENSG00000007402	CACNA2D2	1.96701	3.84643	1.48972	2.58198	0.00982352	0.0343766	0	0	0	0	1.03595	0	0	0	0	17.952	0	0	3.11518	4.08414	8.5333	0	0.685728	0	protein_coding
ENSG00000163625	WDFY3	16.2615	3.84571	0.690457	5.56981	2.55024e-08	4.49566e-07	7.63496	0	0	1.02371	4.66179	1.56449	0	2.52598	0.922379	44.8799	11.9134	75.1604	34.267	1.02103	14.2222	12.6118	23.3148	56.984	protein_coding
ENSG00000124019	FAM124B	1.57653	3.84393	1.33223	2.88534	0.0039099	0.0163088	0	0	0	1.02371	0	0	0	0	0	1.632	9.5307	0.905548	10.3839	1.02103	0	3.88057	0	0	protein_coding
ENSG00000158089	GALNT14	10.5866	3.84353	0.508957	7.55177	4.29374e-14	2.15216e-12	2.18142	3.70758	0.889666	0	1.55393	0.782247	1.87678	0.841994	0.922379	26.9279	15.0903	13.5832	14.5375	12.2524	24.1777	32.0147	27.4291	11.7898	protein_coding
ENSG00000112742	TTK	6.01441	3.83465	0.705895	5.43232	5.56249e-08	9.17139e-07	0	0.926896	0.889666	0	0.517977	0	0	0.841994	3.68952	12.24	15.8845	22.6387	1.03839	8.16828	9.95551	10.6716	10.9716	9.82482	protein_coding
ENSG00000168917	SLC35G2	1.22547	3.8336	1.46133	2.62337	0.00870653	0.0311179	0	0	0	0	0	0	0	0	0	0	4.76535	0	4.15357	1.02103	1.42222	8.73128	0	1.96496	protein_coding
ENSG00000186862	PDZD7	2.50687	3.83142	1.1397	3.36179	0.000774399	0.00413223	1.09071	0	0	0	0	1.56449	0	0	0	0.815998	1.58845	3.62219	1.03839	6.12621	0	1.94028	25.3719	1.96496	protein_coding
ENSG00000206190	ATP10A	13.6436	3.82402	0.743764	5.14144	2.72638e-07	3.86031e-06	0	0	1.77933	0	3.10786	5.47573	1.87678	3.36798	0	27.7439	4.76535	16.2999	2.07679	96.9983	9.95551	39.7758	20.5718	11.7898	protein_coding
ENSG00000224429	LINC00539	3.79345	3.82196	0.899811	4.24752	2.16155e-05	0.000187554	3.27212	0	0	0	0.517977	0	0	0.841994	0	17.952	14.296	2.71664	1.03839	9.18931	2.84443	6.79099	6.85728	1.96496	lncRNA
ENSG00000156968	MPV17L	1.19861	3.82113	1.51653	2.51966	0.0117469	0.0396582	0	0	0	0	0	0	0	0	0	12.24	0.794225	0.905548	5.19197	1.02103	1.42222	0	0	0	protein_coding
ENSG00000135114	OASL	4.00757	3.81836	1.43138	2.66761	0.00763936	0.0279701	0	0	0	0	1.55393	0	0	0	2.76714	0.815998	0	0.905548	8.30715	55.1359	122.311	0	0.685728	1.96496	protein_coding
ENSG00000100433	KCNK10	1.19602	3.81733	1.57198	2.42836	0.0151675	0.0488993	0	0	0	0	0	0	0	0	0	2.448	0.794225	0	0	6.12621	0	8.73128	3.42864	0	protein_coding
ENSG00000003436	TFPI	13.2907	3.81323	0.903091	4.22242	2.41692e-05	0.000206261	6.54425	1.85379	3.55866	2.04742	1.03595	0	0	0.841994	0	53.8559	2.38267	4.52774	1814.07	16.3366	99.5551	39.7758	0.685728	0	protein_coding
ENSG00000255062	AP001318.2	1.51657	3.81277	1.14425	3.33212	0.000861881	0.00453468	0	0	0	0	0.517977	0	0	0	0	5.71199	0	5.43329	3.11518	1.02103	0	6.79099	2.74291	1.96496	lncRNA
ENSG00000183688	FAM101B	319.852	3.81193	0.477039	7.99082	1.34049e-15	8.80219e-14	41.4469	15.7572	22.2417	10.2371	56.9775	16.4272	37.5356	89.2514	92.2379	137.088	877.618	1495.06	844.214	240.964	177.777	308.505	549.268	744.722	protein_coding
ENSG00000246859	STARD4-AS1	2.43429	3.81109	1.14716	3.3222	0.000893097	0.00467601	1.09071	0	0	1.02371	0.517977	0	0	0	0	13.056	2.38267	5.43329	0	9.18931	1.42222	9.70142	0	0	lncRNA
ENSG00000198915	RASGEF1A	5.87911	3.81075	0.821584	4.6383	3.51283e-06	3.79744e-05	0	0.926896	0	1.02371	0.517977	1.56449	0	0.841994	1.84476	6.52799	10.3249	0.905548	25.9598	28.589	5.68887	16.4924	0.685728	3.92993	protein_coding
ENSG00000273749	CYFIP1	17.4156	3.80154	0.493545	7.70252	1.33412e-14	7.26852e-13	6.54425	1.85379	1.77933	2.04742	5.17977	0.782247	0	0.841994	0.922379	30.1919	15.0903	25.3553	18.6911	37.7783	25.5999	25.2237	80.2302	35.3694	protein_coding
ENSG00000094804	CDC6	15.1699	3.79923	0.513589	7.39742	1.38861e-13	6.32743e-12	3.27212	2.78069	2.669	2.04742	2.58989	0.782247	5.63033	0	0	39.9839	30.9748	44.3718	7.26875	15.3155	46.9331	18.4327	34.2864	15.7197	protein_coding
ENSG00000103257	SLC7A5	215.637	3.7974	0.657619	5.77446	7.71998e-09	1.50565e-07	49.0819	8.34206	18.683	7.16597	13.9854	3.91124	112.607	30.3118	19.37	44.0639	212.058	88.7437	1099.66	76.5776	777.952	57.2384	1100.59	161.127	protein_coding
ENSG00000136048	DRAM1	22.452	3.79466	0.539655	7.03164	2.04126e-12	7.57887e-11	2.18142	0	5.338	1.02371	8.28763	1.56449	1.87678	0.841994	4.6119	39.9839	61.1553	20.8276	46.7277	17.3576	109.511	41.7161	11.6574	29.4745	protein_coding
ENSG00000164362	TERT	8.25977	3.79259	0.745103	5.09002	3.58032e-07	4.93015e-06	1.09071	4.63448	0	0	0	1.56449	0	2.52598	0	0.815998	10.3249	24.4498	33.2286	23.4838	7.11108	17.4626	8.22874	13.7548	protein_coding
ENSG00000233099	AC095030.1	1.24798	3.79188	1.49314	2.53953	0.0111	0.0379409	0	0	0	0	0	0	0	0	0	0	0	3.62219	1.03839	1.02103	0	0.970142	2.05718	13.7548	lncRNA
ENSG00000105048	TNNT1	6.64964	3.78282	1.25952	3.00338	0.00267001	0.0118042	3.27212	0	0.889666	0	2.07191	0.782247	0	0.841994	0	0.815998	0	0	88.2634	10.2103	2.84443	9.70142	0	0	protein_coding
ENSG00000100206	DMC1	5.09117	3.77787	0.89103	4.23989	2.2363e-05	0.000193149	0	0	0	0	0.517977	2.34674	1.87678	0	1.84476	15.504	28.5921	7.24438	1.03839	5.10517	18.4888	2.91043	6.17155	0	protein_coding
ENSG00000166851	PLK1	54.9433	3.77615	0.580211	6.50823	7.6043e-11	2.18634e-09	2.18142	10.1959	8.89666	5.11855	12.9494	2.34674	11.2607	1.68399	12.9133	311.711	17.4729	143.077	8.30715	88.83	31.2888	146.491	146.746	27.5095	protein_coding
ENSG00000224950	AL390066.1	2.41793	3.77585	0.953997	3.95793	7.56021e-05	0.000564468	0	0	0.889666	0	0	0.782247	0	0.841994	0	5.71199	1.58845	3.62219	5.19197	6.12621	2.84443	14.5521	1.37146	0	lncRNA
ENSG00000135083	CCNJL	12.0451	3.77307	1.55788	2.42193	0.0154382	0.0495824	0	0	0.889666	1.02371	2.07191	2.34674	0	0.841994	7.37903	44.8799	0	0	14.5375	2.04207	140.799	0	0	0	protein_coding
ENSG00000128408	RIBC2	2.28261	3.77268	1.02236	3.69018	0.000224095	0.00144685	0	0	0	0	1.55393	0	0	0	0	6.52799	0	7.24438	4.15357	3.0631	9.95551	3.88057	2.74291	1.96496	protein_coding
ENSG00000154447	SH3RF1	41.8802	3.76602	0.426973	8.82026	1.14195e-18	1.13953e-16	0	2.78069	7.11733	7.16597	7.25168	0.782247	9.38389	10.1039	7.37903	33.4559	139.784	109.571	60.2268	36.7572	88.1774	60.1488	48.001	125.758	protein_coding
ENSG00000165480	SKA3	15.3784	3.76461	0.582815	6.45937	1.05141e-10	2.95515e-09	3.27212	0.926896	0.889666	2.04742	2.58989	1.56449	0	2.52598	4.6119	25.2959	100.072	25.3553	2.07679	19.3997	18.4888	17.4626	24.6862	25.5445	protein_coding
ENSG00000151376	ME3	14.6579	3.76355	0.508856	7.3961	1.4024e-13	6.37096e-12	2.18142	2.78069	1.77933	3.07113	1.03595	3.12899	1.87678	2.52598	0	14.688	32.5632	18.111	7.26875	39.8204	21.3332	65.9697	26.0577	19.6496	protein_coding
ENSG00000186318	BACE1	12.5272	3.76002	0.757072	4.96653	6.81619e-07	8.85869e-06	0	1.85379	0	0	2.07191	1.56449	1.87678	3.36798	4.6119	2.448	4.76535	73.3494	21.8063	44.9255	2.84443	46.5668	7.54301	5.89489	protein_coding
ENSG00000177096	FAM109B	2.92089	3.7586	0.860217	4.36936	1.2461e-05	0.000117079	0	0	0	0	0.517977	0.782247	1.87678	0	0.922379	4.07999	3.97112	4.52774	3.11518	11.2314	1.42222	5.82085	12.3431	1.96496	protein_coding
ENSG00000137831	UACA	42.1787	3.75643	1.00845	3.72498	0.000195333	0.00128375	9.81637	4.63448	19.5727	3.07113	1.03595	0	7.50711	4.20997	2.76714	5.71199	0.794225	2.71664	370.706	71.4724	116.622	124.178	14.4003	0	protein_coding
ENSG00000272085	AC091979.2	1.89373	3.75035	1.30435	2.87526	0.00403691	0.0167318	0	0	0	0	0	1.56449	0	0	0	15.504	2.38267	2.71664	0	4.08414	0	1.94028	0	5.89489	lncRNA
ENSG00000113070	HBEGF	290.361	3.74706	0.809368	4.62961	3.66361e-06	3.9406e-05	148.336	12.0496	16.014	12.2845	24.8629	11.7337	15.0142	26.9438	95.005	8.97598	198.556	608.528	793.332	22.4628	2249.95	29.1043	387.436	565.91	protein_coding
ENSG00000157703	SVOPL	1.14798	3.74683	1.39584	2.68429	0.00726848	0.0269667	0	0	0	0	0	0	0	0	0	4.89599	0	0	5.19197	5.10517	2.84443	1.94028	0.685728	0	protein_coding
ENSG00000154127	UBASH3B	198.45	3.73727	0.415234	9.00039	2.24924e-19	2.50532e-17	33.812	24.0993	47.1523	16.3794	14.5034	19.5562	63.8104	17.6819	15.6804	184.416	664.766	653.805	335.401	116.398	68.2664	433.654	571.897	290.815	protein_coding
ENSG00000107104	KANK1	2.60866	3.73292	1.28076	2.91461	0.00356133	0.0151148	0	0	0	0	1.55393	0.782247	0	0	0	1.632	0	3.62219	0	10.2103	2.84443	24.2536	2.05718	0	protein_coding
ENSG00000149926	FAM57B	1.86315	3.73164	0.912171	4.09094	4.29625e-05	0.000342538	0	0	0	0	0.517977	0	0	0	0.922379	3.26399	1.58845	4.52774	3.11518	7.14724	4.26665	4.85071	1.37146	1.96496	protein_coding
ENSG00000196839	ADA	121.421	3.7267	0.389501	9.56787	1.09126e-21	1.76445e-19	16.3606	13.9034	14.2347	4.09484	18.1292	3.12899	43.1659	12.6299	31.3609	280.703	105.632	152.132	288.673	301.205	102.4	201.79	379.893	216.146	protein_coding
ENSG00000267583	AC007998.3	1.82065	3.7236	1.48679	2.50445	0.0122641	0.0410724	0	0	0	0	0.517977	0.782247	0	0	0	8.97598	0	0	11.4223	0	2.84443	0	8.22874	0	lncRNA
ENSG00000160062	ZBTB8A	13.1111	3.72089	0.887013	4.19485	2.73048e-05	0.000229632	0	0	0	1.02371	2.07191	2.34674	11.2607	1.68399	0	31.8239	11.1191	16.2999	68.534	27.5679	34.1332	28.1341	0	0	protein_coding
ENSG00000149599	DUSP15	1.90679	3.71555	1.503	2.47208	0.0134328	0.0441604	0	0	0	2.04742	0	0	0	0	0	0.815998	9.5307	1.8111	0	0	14.2222	0	0	5.89489	protein_coding
ENSG00000122966	CIT	11.7617	3.7129	0.528279	7.02829	2.09081e-12	7.72468e-11	2.18142	1.85379	1.77933	1.02371	3.10786	0.782247	0	3.36798	0	30.1919	30.9748	42.5607	12.4607	12.2524	15.6444	17.4626	30.172	5.89489	protein_coding
ENSG00000185291	IL3RA	55.7592	3.70953	0.457698	8.10475	5.28561e-16	3.73144e-14	2.18142	3.70758	7.11733	11.2608	1.03595	12.516	13.1374	7.57795	13.8357	47.3279	75.4514	78.7826	224.293	53.0938	118.044	42.6863	61.7155	229.901	protein_coding
ENSG00000108370	RGS9	8.81751	3.70873	0.802773	4.6199	3.83926e-06	4.10896e-05	2.18142	0.926896	5.338	0	1.55393	0	0	0.841994	0	8.15998	37.3286	0	14.5375	31.6521	503.465	4.85071	10.2859	35.3694	protein_coding
ENSG00000237594	LOC150051	2.36786	3.707	1.33181	2.78342	0.00537885	0.0211456	0	0	0	0	0	0	0	0	2.76714	16.32	7.14802	8.14993	0	0	0	0.970142	1.37146	5.89489	lncRNA
ENSG00000134363	FST	1.48175	3.70568	1.51125	2.45207	0.0142038	0.0462602	1.09071	0	0	0	0	0	0	0	0	4.07999	1.58845	0.905548	0	0	17.0666	1.94028	0	0	protein_coding
ENSG00000129422	MTUS1	4.19393	3.7005	1.32605	2.79062	0.00526075	0.0207409	4.36283	0	0	0	0	0	1.87678	0	0	155.04	2.38267	0.905548	2.07679	0	0	2.91043	56.2297	3.92993	protein_coding
ENSG00000166446	CDYL2	11.2978	3.69976	0.782718	4.72682	2.28066e-06	2.58046e-05	2.18142	0	0	0	3.10786	0	1.87678	0.841994	6.45665	18.768	2.38267	16.2999	41.5357	35.7362	25.5999	41.7161	6.85728	0	protein_coding
ENSG00000176659	C20orf197	1.7722	3.69923	1.39435	2.65302	0.0079776	0.0290107	0	0	0	0	0.517977	0	0	0.841994	0	0.815998	1.58845	0	0	4.08414	0	4.85071	19.2004	0	lncRNA
ENSG00000104611	SH2D4A	2.36113	3.69689	1.14428	3.23077	0.00123457	0.00615931	1.09071	0	0.889666	0	0	0	0	0	0.922379	0	0	1.8111	3.11518	7.14724	2.84443	21.3431	1.37146	1.96496	protein_coding
ENSG00000104369	JPH1	1.82823	3.69558	1.18812	3.11045	0.00186804	0.00870458	0	0	0.889666	0	0.517977	0	0	0	0	0	5.55957	4.52774	0	3.0631	5.68887	8.73128	0	3.92993	protein_coding
ENSG00000086289	EPDR1	7.3713	3.68889	0.77463	4.76213	1.91556e-06	2.22683e-05	0	0.926896	0	0	2.07191	0	7.50711	0	0.922379	17.952	3.1769	18.111	8.30715	39.8204	4.26665	17.4626	8.22874	3.92993	protein_coding
ENSG00000244242	IFITM10	5.13874	3.68797	1.19181	3.09442	0.00197199	0.00910713	1.09071	0	0	0	2.58989	0	3.75356	0	0	0	18.2672	1.8111	13.4991	6.12621	2.84443	0	42.5151	0	protein_coding
ENSG00000085871	MGST2	27.0911	3.68722	0.478504	7.70574	1.30092e-14	7.11342e-13	1.09071	1.85379	6.22766	2.04742	5.17977	0.782247	1.87678	5.05196	10.1462	97.1038	38.917	44.3718	9.34554	68.4093	27.0221	83.4322	35.6579	49.1241	protein_coding
ENSG00000121152	NCAPH	15.0735	3.68592	0.507346	7.2651	3.72762e-13	1.60149e-11	2.18142	2.78069	0	1.02371	2.58989	3.12899	9.38389	0.841994	0	13.056	44.4766	47.0885	20.7679	18.3786	18.4888	14.5521	41.1437	31.4394	protein_coding
ENSG00000186998	EMID1	7.04904	3.68112	0.998419	3.68695	0.000226958	0.00146282	0	0.926896	0	2.04742	0.517977	0	7.50711	0	0	3.26399	16.6787	2.71664	5.19197	36.7572	0	46.5668	2.74291	1.96496	protein_coding
ENSG00000121236	TRIM6	1.0837	3.67725	1.42573	2.57921	0.00990251	0.0345967	0	0	0	0	0	0	0	0	0	4.89599	0.794225	3.62219	2.07679	7.14724	0	0.970142	0	0	protein_coding
ENSG00000282608	ADORA3	1.8429	3.67442	1.17117	3.13741	0.00170449	0.00807258	0	0	0	0	0	0	0	0	1.84476	0.815998	1.58845	0	1.03839	15.3155	1.42222	3.88057	1.37146	5.89489	protein_coding
ENSG00000237693	IRGM	8.83135	3.66863	0.946398	3.87642	0.000106007	0.000752963	0	3.70758	0	0	1.55393	0.782247	0	5.05196	0	2.448	3.1769	10.8666	75.8027	4.08414	0	36.8654	4.8001	9.82482	protein_coding
ENSG00000137804	NUSAP1	106.119	3.66694	0.346384	10.5864	3.44762e-26	8.49867e-24	23.9956	16.6841	9.78633	8.18968	16.0573	17.9917	20.6446	20.2079	6.45665	168.912	365.343	237.253	86.1866	80.6617	251.732	118.357	129.603	332.079	protein_coding
ENSG00000082458	DLG3	20.2485	3.66515	0.634546	5.77603	7.64842e-09	1.49363e-07	5.45354	5.56137	5.338	1.02371	3.62584	0	1.87678	0	3.68952	55.4879	81.0109	81.4993	23.883	18.3786	5.68887	19.4028	3.42864	49.1241	protein_coding
ENSG00000197182	MIRLET7BHG	3.52595	3.66235	1.05558	3.46952	0.000521386	0.00295073	0	0	0	0	1.55393	2.34674	0	0	0	5.71199	1.58845	8.14993	7.26875	22.4628	0	11.6417	2.74291	0	lncRNA
ENSG00000205726	ITSN1	42.0078	3.65901	0.547417	6.68413	2.32306e-11	7.26235e-10	8.72566	4.63448	7.11733	1.02371	5.69775	7.82247	1.87678	9.26193	8.30141	8.15998	112.78	147.604	93.4554	21.4417	22.7555	24.2536	45.2581	225.971	protein_coding
ENSG00000172889	EGFL7	40.5997	3.65435	0.671069	5.44557	5.16412e-08	8.57096e-07	4.36283	12.9765	4.44833	2.04742	3.10786	3.12899	18.7678	6.73595	0	234.192	19.8556	53.4273	147.452	37.7783	61.1553	112.536	6.85728	1.96496	protein_coding
ENSG00000117228	GBP1	21.6457	3.65372	0.586335	6.23146	4.62115e-10	1.14102e-08	2.18142	0.926896	0.889666	1.02371	5.69775	0.782247	0	7.57795	8.30141	14.688	20.6498	5.43329	38.4205	106.188	68.2664	42.6863	38.4008	27.5095	protein_coding
ENSG00000123473	STIL	11.076	3.65297	0.553018	6.60551	3.9614e-11	1.1819e-09	4.36283	0.926896	0.889666	1.02371	2.58989	1.56449	0	1.68399	0.922379	38.3519	35.7401	12.6777	7.26875	9.18931	36.9776	12.6118	10.9716	21.6146	protein_coding
ENSG00000176105	YES1	10.3062	3.65202	0.851267	4.2901	1.78593e-05	0.00015875	1.09071	1.85379	1.77933	0	1.55393	0	5.63033	0.841994	1.84476	8.15998	11.1191	2.71664	9.34554	8.16828	86.7552	42.6863	0	1.96496	protein_coding
ENSG00000267265	AC011476.3	2.8193	3.65142	1.2091	3.01994	0.00252823	0.0112576	2.18142	0	0	1.02371	0.517977	0	0	0	0	2.448	0.794225	0.905548	10.3839	0	29.8665	1.94028	0.685728	0	lncRNA
ENSG00000008283	CYB561	35.8413	3.64817	0.417101	8.74648	2.20112e-18	2.08165e-16	4.36283	4.63448	4.44833	0	5.69775	0.782247	11.2607	5.05196	12.9133	22.848	88.9532	109.571	42.5741	72.4935	52.622	79.5517	50.7439	76.6336	protein_coding
ENSG00000144476	ACKR3	2.83181	3.64571	1.02391	3.56059	0.000370018	0.0022238	0	0	0	0	0	2.34674	1.87678	0	0	9.79198	8.73647	13.5832	0	3.0631	1.42222	4.85071	1.37146	3.92993	protein_coding
ENSG00000119326	CTNNAL1	24.3737	3.64507	0.523881	6.95781	3.45604e-12	1.22857e-10	5.45354	5.56137	0	1.02371	6.21573	1.56449	9.38389	3.36798	0.922379	26.9279	58.7726	40.7496	11.4223	21.4417	110.933	58.2085	17.8289	58.9489	protein_coding
ENSG00000143554	SLC27A3	155.261	3.64503	0.47259	7.71287	1.23019e-14	6.75123e-13	16.3606	26.88	14.2347	6.14226	36.2584	7.04023	48.7962	27.7858	24.9042	238.272	104.838	425.607	375.898	304.268	27.0221	293.953	708.357	108.073	protein_coding
ENSG00000100219	XBP1	268.498	3.64052	0.335153	10.8623	1.74337e-27	5.69893e-25	41.4469	40.7834	42.704	41.9721	37.8123	25.0319	75.0711	38.7317	18.4476	465.935	281.156	878.381	342.67	249.132	311.465	1234.02	325.035	383.168	protein_coding
ENSG00000120549	KIAA1217	2.66801	3.63861	1.17533	3.09582	0.00196268	0.00907248	0	0.926896	0	0	0.517977	1.56449	0	0	0	4.07999	0	1.8111	24.9214	3.0631	0	2.91043	8.22874	0	protein_coding
ENSG00000077782	FGFR1	38.6019	3.63822	0.498966	7.29152	3.06474e-13	1.3475e-11	5.45354	6.48827	4.44833	3.07113	3.10786	1.56449	11.2607	7.57795	10.1462	79.1518	193.791	59.7661	6.23036	54.1148	73.9553	71.7905	16.4575	86.4584	protein_coding
ENSG00000072682	P4HA2	6.48514	3.63785	0.795309	4.57413	4.78206e-06	4.98667e-05	0	0	0	0	0.517977	2.34674	0	0.841994	4.6119	10.608	14.296	38.033	5.19197	4.08414	1.42222	3.88057	17.1432	13.7548	protein_coding
ENSG00000136630	HLX	90.8681	3.63404	0.413068	8.79768	1.39677e-18	1.37276e-16	15.2699	27.8069	5.338	6.14226	15.5393	4.69348	16.891	19.3659	11.0685	93.8398	237.473	134.021	95.5322	126.608	236.088	30.0744	216.004	343.869	protein_coding
ENSG00000169715	MT1E	2.43398	3.63293	1.23887	2.93247	0.0033628	0.0143941	1.09071	0	0	0	1.55393	0	0	0	0	0	3.1769	2.71664	10.3839	3.0631	0	1.94028	19.8861	0	protein_coding
ENSG00000100473	COCH	3.30891	3.63107	0.922682	3.93534	8.30781e-05	0.000612976	0	0.926896	0.889666	1.02371	0.517977	0	0	0	0.922379	2.448	8.73647	3.62219	3.11518	0	2.84443	17.4626	15.086	1.96496	protein_coding
ENSG00000250361	GYPB	35.0151	3.62631	1.09327	3.31694	0.00091009	0.00474845	3.27212	0.926896	15.1243	9.21339	7.76966	7.04023	1.87678	0.841994	0.922379	381.887	7.14802	47.0885	18.6911	0	4.26665	122.238	0	1.96496	protein_coding
ENSG00000166025	AMOTL1	15.2404	3.62148	0.60039	6.03189	1.62057e-09	3.58873e-08	2.18142	0	0	2.04742	5.17977	0.782247	1.87678	4.20997	3.68952	38.3519	49.2419	6.33883	2.07679	20.4207	39.8221	23.2834	47.3152	27.5095	protein_coding
ENSG00000102384	CENPI	6.6739	3.6148	0.643936	5.6136	1.98155e-08	3.58564e-07	2.18142	0.926896	0.889666	0	0.517977	2.34674	1.87678	0.841994	0	19.584	25.4152	16.2999	5.19197	4.08414	4.26665	9.70142	10.2859	15.7197	protein_coding
ENSG00000170160	CCDC144A	2.20003	3.61469	1.31286	2.7533	0.00589981	0.0227242	0	0	0	0	0	0	0	0.841994	1.84476	0	0.794225	14.4888	1.03839	4.08414	1.42222	0	15.086	0	protein_coding
ENSG00000136274	NACAD	2.34848	3.61386	1.2909	2.79949	0.00511827	0.0202963	0	0	0	0	0	0.782247	0	0	1.84476	0.815998	0.794225	0.905548	0	1.02103	5.68887	2.91043	0	27.5095	protein_coding
ENSG00000154027	AK5	7.63403	3.61307	0.865595	4.17409	2.99183e-05	0.000248966	2.18142	0	0.889666	0	1.55393	0	0	0	5.53427	11.424	13.5018	5.43329	2.07679	39.8204	14.2222	0	32.9149	7.85986	protein_coding
ENSG00000092051	JPH4	1.37557	3.61276	1.46745	2.46193	0.0138191	0.0452323	1.09071	0	0	0	0	0	0	0	0	0	0	7.24438	0	1.02103	0	8.73128	2.74291	3.92993	protein_coding
ENSG00000099864	PALM	41.154	3.60382	0.638129	5.64748	1.62818e-08	3.00037e-07	0	11.1227	3.55866	6.14226	9.32359	6.25798	3.75356	2.52598	12.9133	4.89599	51.6246	76.066	271.021	22.4628	102.4	76.6412	3.42864	76.6336	protein_coding
ENSG00000104899	AMH	15.1203	3.60312	0.792088	4.54889	5.39294e-06	5.55056e-05	3.27212	3.70758	5.338	0	3.10786	0	3.75356	0	1.84476	8.15998	26.2094	93.2714	31.1518	66.3673	0	1.94028	10.2859	13.7548	protein_coding
ENSG00000175707	KDF1	4.00224	3.60243	1.3304	2.70778	0.00677344	0.0254059	0	0	1.77933	0	2.07191	0	1.87678	0	0	16.32	0	0	5.19197	3.0631	0	0	39.7722	1.96496	protein_coding
ENSG00000228495	LINC01013	60.6332	3.59859	0.758331	4.74542	2.08077e-06	2.39759e-05	1.09071	9.26896	12.4553	17.4031	12.9494	17.9917	0	8.41994	2.76714	493.679	23.8267	142.171	13.4991	41.8624	2.84443	133.88	2.05718	155.232	lncRNA
ENSG00000079308	TNS1	28.6713	3.59801	0.724783	4.96425	6.89653e-07	8.93223e-06	13.0885	0.926896	6.22766	1.02371	8.28763	0.782247	3.75356	2.52598	2.76714	303.551	16.6787	18.111	37.3822	24.5048	24.1777	43.6564	2.74291	5.89489	protein_coding
ENSG00000136161	RCBTB2	26.4783	3.58906	0.366043	9.805	1.07151e-22	2.12005e-20	9.81637	5.56137	0.889666	1.02371	3.62584	1.56449	3.75356	1.68399	9.22379	51.4079	53.2131	45.2774	34.267	58.199	44.0887	42.6863	35.6579	74.6687	protein_coding
ENSG00000168754	FAM178B	12.7076	3.5851	0.950347	3.77241	0.000161679	0.00108923	0	0.926896	3.55866	0	5.69775	0	3.75356	0.841994	2.76714	26.9279	1.58845	113.193	0	20.4207	7.11108	37.8355	4.11437	0	protein_coding
ENSG00000134201	GSTM5	9.58318	3.58407	1.43674	2.49459	0.0126102	0.0420071	1.09071	0.926896	2.669	0	0	0	0	8.41994	0	76.7038	11.9134	0	1.03839	0	4.26665	28.1341	0	37.3343	protein_coding
ENSG00000147145	LPAR4	2.71379	3.58396	1.15896	3.09239	0.00198552	0.00914994	0	0	0.889666	1.02371	0	1.56449	0	0	0	0	3.97112	18.111	0	9.18931	0	1.94028	8.22874	3.92993	protein_coding
ENSG00000172985	SH3RF3	21.7145	3.58183	0.716173	5.00134	5.69321e-07	7.55593e-06	3.27212	1.85379	8.007	2.04742	3.10786	9.38697	0	0.841994	0.922379	29.3759	30.1805	42.5607	5.19197	25.5259	5.68887	0.970142	172.803	49.1241	protein_coding
ENSG00000277978	AC010542.5	1.33944	3.57601	1.29005	2.772	0.00557137	0.0217376	0	0	0	0	0	0	0	0.841994	0	4.89599	3.1769	6.33883	0	1.02103	0	1.94028	0	5.89489	lncRNA
ENSG00000259820	AC083843.3	5.78741	3.57189	0.708944	5.03833	4.69619e-07	6.34471e-06	0	1.85379	0.889666	0	0.517977	0	7.50711	0	0	18.768	8.73647	10.8666	10.3839	4.08414	18.4888	8.73128	5.48582	7.85986	lncRNA
ENSG00000101190	TCFL5	67.3566	3.57047	0.677914	5.26684	1.38789e-07	2.11498e-06	10.9071	12.0496	6.22766	9.21339	6.7337	3.91124	20.6446	12.6299	12.9133	674.831	64.3322	141.265	164.066	13.2735	12.7999	17.4626	7.54301	21.6146	protein_coding
ENSG00000100298	APOBEC3H	4.17398	3.56578	0.973315	3.66354	0.000248752	0.00158562	0	0	1.77933	0	1.03595	0.782247	0	0	1.84476	0	34.9459	0.905548	2.07679	6.12621	8.5333	4.85071	10.2859	1.96496	protein_coding
ENSG00000158813	EDA	1.75876	3.56565	1.37491	2.59338	0.00950371	0.0334608	2.18142	0	0	0	0	0	0	0	0	2.448	1.58845	9.96102	1.03839	0	0	0	0.685728	13.7548	protein_coding
ENSG00000136982	DSCC1	8.97999	3.56377	0.626498	5.68839	1.28242e-08	2.40145e-07	0	0	0	1.02371	2.07191	3.12899	1.87678	4.20997	0	39.1679	31.769	12.6777	6.23036	16.3366	9.95551	13.582	13.7146	5.89489	protein_coding
ENSG00000114656	KIAA1257	1.04207	3.55219	1.25411	2.83244	0.00461941	0.0186375	0	0	0	0	0	0	0	0	0	3.26399	2.38267	1.8111	0	2.04207	1.42222	1.94028	0	5.89489	protein_coding
ENSG00000180592	SKIDA1	2.56415	3.54852	0.972358	3.64939	0.000262859	0.00166007	0	0	0	0	0.517977	0	0	1.68399	0.922379	2.448	4.76535	1.8111	4.15357	14.2945	7.11108	7.76114	0.685728	0	protein_coding
ENSG00000135363	LMO2	52.243	3.53664	0.578602	6.11239	9.81497e-10	2.27991e-08	0	9.26896	0.889666	6.14226	20.2011	5.47573	26.2749	5.89396	1.84476	106.896	53.2131	107.76	77.8795	232.796	7.11108	125.148	94.6305	58.9489	protein_coding
ENSG00000073150	PANX2	12.7401	3.53353	0.77062	4.58531	4.53312e-06	4.75345e-05	5.45354	2.78069	0.889666	1.02371	2.07191	0.782247	1.87678	3.36798	0	0	25.4152	20.8276	25.9598	10.2103	96.7107	13.582	0.685728	17.6847	protein_coding
ENSG00000180539	C9orf139	37.6678	3.53333	0.673735	5.24439	1.568e-07	2.3578e-06	1.09071	1.85379	3.55866	2.04742	9.84157	14.8627	1.87678	7.57795	10.1462	4.07999	18.2672	104.138	83.0715	167.45	17.0666	201.79	25.3719	3.92993	lncRNA
ENSG00000166035	LIPC	6.93277	3.53213	0.895938	3.94238	8.06766e-05	0.000596721	1.09071	0	0	0	1.03595	0	5.63033	3.36798	0	8.15998	6.3538	0.905548	47.7661	12.2524	22.7555	10.6716	4.8001	0	protein_coding
ENSG00000105281	SLC1A5	88.3814	3.52643	0.40611	8.68344	3.83971e-18	3.52059e-16	9.81637	7.41516	27.5797	17.4031	21.755	10.9515	7.50711	10.1039	12.9133	128.112	106.426	147.604	156.797	90.8721	536.176	97.9844	154.289	47.1591	protein_coding
ENSG00000136492	BRIP1	14.4176	3.52292	0.498512	7.06687	1.58467e-12	5.97209e-11	4.36283	2.78069	1.77933	0	1.03595	6.25798	1.87678	0.841994	1.84476	39.9839	32.5632	48.8996	9.34554	13.2735	24.1777	14.5521	20.5718	35.3694	protein_coding
ENSG00000170074	FAM153A	2.06726	3.522	1.18186	2.98006	0.00288195	0.0126052	0	0.926896	0.889666	1.02371	0	0	0	0	0	17.136	5.55957	2.71664	6.23036	2.04207	0	0	0.685728	0	protein_coding
ENSG00000007968	E2F2	122	3.52115	0.529268	6.65287	2.87436e-11	8.78491e-10	4.36283	25.0262	26.69	24.569	33.6685	30.5076	5.63033	19.3659	4.6119	381.887	269.242	606.717	24.9214	46.9676	170.666	59.1787	326.407	135.583	protein_coding
ENSG00000146426	TIAM2	21.6751	3.5178	0.526627	6.67986	2.39166e-11	7.46128e-10	3.27212	2.78069	2.669	2.04742	2.07191	8.60472	0	3.36798	5.53427	62.0159	106.426	36.2219	16.6143	7.14724	21.3332	16.4924	26.7434	66.8088	protein_coding
ENSG00000076382	SPAG5	21.1644	3.51376	0.511428	6.87049	6.39817e-12	2.17668e-10	4.36283	6.48827	2.669	1.02371	5.17977	7.04023	0	2.52598	0	94.6558	41.2997	28.9775	9.34554	23.4838	68.2664	24.2536	39.7722	21.6146	protein_coding
ENSG00000133142	TCEAL4	69.0969	3.51306	0.457868	7.67265	1.68481e-14	8.85823e-13	17.4513	8.34206	6.22766	5.11855	11.3955	9.38697	16.891	8.41994	17.5252	121.584	158.845	164.81	92.417	69.4304	41.2443	91.1934	14.4003	389.063	protein_coding
ENSG00000178922	HYI	35.133	3.51288	0.490735	7.1584	8.16246e-13	3.27304e-11	3.27212	2.78069	0.889666	7.16597	12.9494	3.91124	7.50711	10.1039	1.84476	175.44	53.2131	27.1664	130.838	24.5048	52.622	37.8355	39.0865	41.2643	protein_coding
ENSG00000135362	PRR5L	9.71896	3.50537	0.599149	5.85057	4.89891e-09	9.91452e-08	1.09071	0	0.889666	1.02371	1.55393	0	5.63033	0.841994	4.6119	23.664	7.14802	16.2999	13.4991	39.8204	8.5333	27.164	5.48582	17.6847	protein_coding
ENSG00000178078	STAP2	1.99698	3.4997	1.00309	3.48891	0.000484993	0.002774	0	0	0	2.04742	0.517977	0	0	0	0	4.07999	2.38267	5.43329	4.15357	0	7.11108	6.79099	3.42864	0	protein_coding
ENSG00000060982	BCAT1	39.9877	3.48944	0.46688	7.47396	7.7818e-14	3.7385e-12	11.9978	3.70758	7.11733	6.14226	10.3595	7.82247	7.50711	4.20997	0	9.79198	52.4188	58.8606	42.5741	93.9352	108.088	112.536	145.374	37.3343	protein_coding
ENSG00000262370	AC108134.3	8.15393	3.48935	0.618555	5.64113	1.68935e-08	3.10168e-07	4.36283	2.78069	0	0	1.03595	0	1.87678	1.68399	0.922379	10.608	25.4152	16.2999	5.19197	30.631	4.26665	18.4327	7.54301	15.7197	lncRNA
ENSG00000007384	RHBDF1	2.13931	3.48804	1.32768	2.62716	0.00861014	0.0308337	0	0	0	0	2.07191	0	0	0	0	0.815998	3.1769	0	0	11.2314	8.5333	5.82085	6.85728	0	protein_coding
ENSG00000076003	MCM6	29.7829	3.48799	0.448962	7.76901	7.91041e-15	4.48863e-13	15.2699	0	4.44833	2.04742	4.66179	2.34674	1.87678	5.89396	7.37903	128.112	60.3611	68.8216	31.1518	35.7362	55.4664	41.7161	45.2581	25.5445	protein_coding
ENSG00000068489	PRR11	58.4574	3.48698	0.357812	9.74529	1.93229e-22	3.5926e-20	5.45354	6.48827	7.11733	5.11855	14.5034	15.6449	9.38389	10.9459	10.1462	54.6719	160.433	171.148	22.8447	85.7669	109.511	117.387	117.945	127.723	protein_coding
ENSG00000106991	ENG	66.526	3.47993	0.32271	10.7834	4.12152e-27	1.2648e-24	5.45354	9.26896	13.345	6.14226	11.3955	15.6449	16.891	9.26193	11.9909	106.08	81.8051	134.021	64.3804	187.87	46.9331	161.044	209.833	106.108	protein_coding
ENSG00000233547	AL158212.2	3.30491	3.47482	0.849373	4.09104	4.29446e-05	0.000342538	2.18142	0.926896	0.889666	0	0	0	1.87678	0	0	15.504	1.58845	6.33883	4.15357	2.04207	8.5333	4.85071	2.74291	7.85986	lncRNA
ENSG00000122547	EEPD1	5.32212	3.47181	0.696367	4.9856	6.17713e-07	8.14071e-06	0	0	0.889666	1.02371	0.517977	0.782247	0	3.36798	0.922379	14.688	6.3538	9.96102	12.4607	11.2314	0	4.85071	13.0288	15.7197	protein_coding
ENSG00000188026	RILPL1	4.97348	3.47099	0.989608	3.50744	0.000452446	0.00262074	1.09071	0	0	2.04742	2.07191	0	0	1.68399	0	14.688	3.1769	23.5442	0	0	8.5333	0.970142	6.17155	25.5445	protein_coding
ENSG00000148180	GSN	125.608	3.46542	0.536395	6.46056	1.04315e-10	2.93741e-09	21.8142	12.9765	20.4623	18.4268	29.0067	17.2094	22.5213	28.6278	16.6028	106.896	171.553	96.8936	16.6143	241.985	11.3777	237.685	866.075	324.219	protein_coding
ENSG00000157240	FZD1	1.20187	3.45777	1.08194	3.19589	0.00139399	0.00682339	0	0	0	0	0	0.782247	0	0	0	4.89599	1.58845	1.8111	0	4.08414	1.42222	0.970142	4.11437	1.96496	protein_coding
ENSG00000211897	IGHG3	10.0327	3.45776	0.773451	4.47056	7.80145e-06	7.7689e-05	0	0.926896	4.44833	1.02371	1.03595	1.56449	3.75356	2.52598	0	3.26399	38.1228	14.4888	2.07679	8.16828	2.84443	9.70142	4.11437	82.5285	IG_C_gene
ENSG00000100321	SYNGR1	84.1851	3.45404	0.44496	7.7626	8.32059e-15	4.66853e-13	26.177	19.4648	17.7933	3.07113	10.3595	7.04023	9.38389	15.1559	18.4476	131.376	121.516	132.21	67.4956	208.291	21.3332	279.401	360.007	66.8088	protein_coding
ENSG00000137962	ARHGAP29	12.7147	3.44971	1.06553	3.23754	0.00120563	0.00604102	2.18142	0.926896	2.669	0	0	2.34674	1.87678	1.68399	7.37903	9.79198	27.7979	1.8111	0	0	14.2222	2.91043	0	153.267	protein_coding
ENSG00000067182	TNFRSF1A	58.9041	3.44745	0.433506	7.95249	1.82796e-15	1.14054e-13	7.63496	1.85379	8.89666	1.02371	14.5034	4.69348	13.1374	15.1559	22.1371	122.4	66.7149	109.571	80.9947	213.396	68.2664	202.76	52.1153	55.019	protein_coding
ENSG00000079257	LXN	4.3313	3.44499	0.80424	4.28354	1.83942e-05	0.000162511	0	0	0.889666	0	1.55393	0.782247	0	1.68399	0.922379	14.688	1.58845	7.24438	6.23036	6.12621	1.42222	26.1938	2.74291	5.89489	protein_coding
ENSG00000114107	CEP70	31.0808	3.44474	0.448654	7.67794	1.61667e-14	8.59004e-13	7.63496	4.63448	5.338	4.09484	4.14382	7.04023	9.38389	5.89396	0	31.8239	59.5669	41.6552	181.719	33.6941	56.8887	30.0744	26.7434	49.1241	protein_coding
ENSG00000107518	ATRNL1	3.08172	3.44117	1.32097	2.60503	0.00918653	0.0325336	0	0	0.889666	0	0	0.782247	0	0	2.76714	19.584	8.73647	15.3943	0	0	1.42222	0	0	5.89489	protein_coding
ENSG00000164104	HMGB2	199.082	3.42939	0.48382	7.08815	1.35917e-12	5.17416e-11	40.3562	14.8303	57.8283	39.9247	15.5393	30.5076	5.63033	30.3118	68.2561	477.359	501.95	301.547	307.364	45.9466	317.154	149.402	100.802	1078.77	protein_coding
ENSG00000151693	ASAP2	8.29748	3.42676	0.76703	4.46756	7.91156e-06	7.85619e-05	3.27212	1.85379	0	1.02371	3.10786	0.782247	1.87678	0.841994	0	51.4079	11.1191	1.8111	35.3054	15.3155	5.68887	12.6118	1.37146	1.96496	protein_coding
ENSG00000125266	EFNB2	21.7456	3.42352	0.842071	4.06559	4.79103e-05	0.000377583	5.45354	2.78069	0.889666	1.02371	1.55393	0.782247	20.6446	0.841994	1.84476	31.0079	117.545	68.8216	1.03839	0	38.3998	0.970142	78.173	19.6496	protein_coding
ENSG00000161714	PLCD3	2.43479	3.42337	1.03685	3.3017	0.000961025	0.00498136	0	0	0	0	0.517977	0	3.75356	0	0.922379	2.448	14.296	5.43329	4.15357	0	0	4.85071	5.48582	1.96496	protein_coding
ENSG00000197558	SSPO	4.74984	3.41971	0.798219	4.28417	1.83421e-05	0.000162336	0	0.926896	0	1.02371	1.55393	0	3.75356	0.841994	0	10.608	1.58845	16.2999	8.30715	14.2945	1.42222	5.82085	1.37146	17.6847	transcribed_unitary_pseudogene
ENSG00000123080	CDKN2C	21.8323	3.41836	0.454164	7.5267	5.2037e-14	2.56551e-12	4.36283	6.48827	5.338	0	6.7337	0	5.63033	4.20997	0.922379	55.4879	27.7979	28.9775	18.6911	72.4935	25.5999	63.0592	37.715	29.4745	protein_coding
ENSG00000162654	GBP4	155.365	3.41668	0.320972	10.6448	1.84409e-26	4.86483e-24	22.9049	11.1227	11.5657	21.4979	30.5607	31.2899	45.0427	31.9958	35.0504	245.615	253.358	177.487	170.296	395.14	564.62	417.161	141.26	190.602	protein_coding
ENSG00000196460	RFX8	1.15162	3.41476	1.29427	2.63837	0.00833059	0.0300689	0	0	0	0	0.517977	0	0	0	0	1.632	2.38267	7.24438	1.03839	3.0631	0	4.85071	0	0	protein_coding
ENSG00000144668	ITGA9	3.70496	3.41337	1.03303	3.30422	0.00095242	0.00494358	0	0	1.77933	1.02371	1.55393	0	0	0	0.922379	1.632	3.1769	0	152.644	8.16828	1.42222	37.8355	6.17155	1.96496	protein_coding
ENSG00000140525	FANCI	34.8742	3.41271	0.352799	9.67325	3.91745e-22	6.93019e-20	6.54425	3.70758	4.44833	6.14226	5.69775	6.25798	3.75356	7.57795	9.22379	133.824	84.982	58.8606	34.267	38.7993	31.2888	67.9099	43.8866	80.5635	protein_coding
ENSG00000150760	DOCK1	2.36207	3.41191	1.37737	2.47711	0.0132451	0.043677	2.18142	0	0.889666	0	0.517977	0	0	0	0	0.815998	0	0	3.11518	7.14724	0	27.164	0.685728	0	protein_coding
ENSG00000096060	FKBP5	218.653	3.40993	0.53647	6.35623	2.06762e-10	5.53216e-09	39.2655	28.7338	92.5253	21.4979	27.9708	10.9515	16.891	15.9979	83.9365	86.4958	112.78	200.126	611.614	105.167	72.533	786.785	600.698	1021.78	protein_coding
ENSG00000232653	GOLGA8N	2.47377	3.4035	1.2967	2.62474	0.00867153	0.0310092	0	1.85379	0	0	0	0	0	1.68399	0	0.815998	0.794225	0	6.23036	20.4207	0	10.6716	2.05718	0	protein_coding
ENSG00000138646	HERC5	43.9529	3.39968	0.55076	6.1727	6.71328e-10	1.60692e-08	4.36283	6.48827	8.007	16.3794	7.25168	10.1692	1.87678	8.41994	4.6119	91.3918	41.2997	25.3553	95.5322	181.744	206.221	22.3133	2.74291	56.984	protein_coding
ENSG00000138172	CALHM2	3.13443	3.3928	0.900878	3.76611	0.000165813	0.00111409	3.27212	0	0	0	0	0	0	0	1.84476	9.79198	3.1769	2.71664	2.07679	9.18931	1.42222	2.91043	8.22874	11.7898	protein_coding
ENSG00000148498	PARD3	25.771	3.39272	0.712194	4.76375	1.90027e-06	2.21335e-05	13.0885	1.85379	0	1.02371	4.66179	0.782247	11.2607	5.05196	3.68952	44.0639	44.4766	88.7437	5.19197	1.02103	92.4441	4.85071	33.6007	108.073	protein_coding
ENSG00000154134	ROBO3	8.56713	3.38795	0.986085	3.43575	0.000590908	0.00327757	0	0.926896	1.77933	3.07113	1.55393	1.56449	0	4.20997	0	18.768	4.76535	6.33883	0	43.9045	4.26665	63.0592	0	0	protein_coding
ENSG00000164105	SAP30	66.7266	3.38778	0.663879	5.10302	3.34283e-07	4.62856e-06	25.0863	12.0496	13.345	6.14226	8.28763	14.8627	3.75356	5.05196	15.6804	5.71199	27.0036	70.6327	512.966	7.14724	18.4888	91.1934	47.3152	316.359	protein_coding
ENSG00000223573	TINCR	1.9371	3.38468	1.05931	3.19516	0.00139751	0.00683498	0	0	0	1.02371	0	1.56449	0	0	0	4.07999	0.794225	2.71664	4.15357	0	12.7999	0.970142	4.8001	1.96496	protein_coding
ENSG00000169684	CHRNA5	1.6258	3.38398	1.20319	2.81251	0.00491566	0.019617	0	0	0	0	0	0	3.75356	0	0	0.815998	5.55957	2.71664	2.07679	0	0	7.76114	0.685728	5.89489	protein_coding
ENSG00000052126	PLEKHA5	28.6817	3.38368	0.576225	5.87214	4.30208e-09	8.77753e-08	7.63496	1.85379	6.22766	3.07113	3.10786	4.69348	13.1374	4.20997	2.76714	13.872	49.2419	64.2939	0	77.5986	19.911	90.2232	40.458	113.968	protein_coding
ENSG00000168140	VASN	1.55093	3.3794	1.20461	2.80539	0.0050256	0.0199604	0	0	0	0	0	1.56449	0	0	0	0	0.794225	1.8111	2.07679	2.04207	5.68887	0	4.11437	9.82482	protein_coding
ENSG00000165795	NDRG2	42.6967	3.3768	0.765923	4.4088	1.03947e-05	9.98542e-05	6.54425	13.9034	3.55866	1.02371	9.32359	4.69348	9.38389	12.6299	6.45665	8.15998	1.58845	40.7496	19.7295	511.538	52.622	51.4175	3.42864	11.7898	protein_coding
ENSG00000169258	GPRIN1	6.76491	3.37082	1.04924	3.21262	0.0013153	0.00650142	4.36283	0	0	1.02371	0	0.782247	3.75356	0.841994	0.922379	39.1679	48.4477	12.6777	0	5.10517	0	1.94028	2.74291	0	protein_coding
ENSG00000172458	IL17D	1.13661	3.36547	1.3181	2.55328	0.0106713	0.0367953	0	0	0	0	0	0	0	0	0.922379	2.448	8.73647	0	3.11518	1.02103	2.84443	0	1.37146	0	protein_coding
ENSG00000165949	IFI27	7.79214	3.3642	0.763464	4.4065	1.05056e-05	0.000100684	3.27212	1.85379	2.669	3.07113	0	0	0	0.841994	0.922379	27.7439	5.55957	1.8111	34.267	19.3997	25.5999	7.76114	5.48582	0	protein_coding
ENSG00000137936	BCAR3	3.96897	3.36056	0.86042	3.90572	9.39455e-05	0.000680144	0	0.926896	0.889666	1.02371	0.517977	0.782247	1.87678	0.841994	0	15.504	19.0614	9.05548	0	3.0631	7.11108	0	6.85728	3.92993	protein_coding
ENSG00000173548	SNX33	2.43616	3.35541	0.946342	3.54567	0.00039162	0.00233127	0	0.926896	0	0	2.07191	0	0	0	0	3.26399	6.3538	2.71664	1.03839	9.18931	1.42222	8.73128	6.17155	1.96496	protein_coding
ENSG00000145708	CRHBP	1.83875	3.3538	1.13135	2.96443	0.00303247	0.013141	0	0	0.889666	1.02371	0.517977	0	0	0	0	6.52799	1.58845	2.71664	0	7.14724	0	6.79099	0	5.89489	protein_coding
ENSG00000182253	SYNM	1.69726	3.34338	1.26491	2.64318	0.00821307	0.0296803	0	0	0	0	1.03595	0	0	0.841994	0	1.632	0	0.905548	1.03839	1.02103	56.8887	2.91043	19.2004	1.96496	protein_coding
ENSG00000279159	AC003681.1	3.766	3.34059	1.32286	2.52527	0.0115609	0.0391622	2.18142	0.926896	0	3.07113	0	0	0	0	0	40.7999	1.58845	0	0	0	5.68887	8.73128	4.8001	0	lncRNA
ENSG00000179604	CDC42EP4	7.05488	3.33791	0.665169	5.01814	5.21751e-07	6.97384e-06	4.36283	0	0.889666	0	2.07191	0	1.87678	2.52598	0	4.89599	9.5307	13.5832	10.3839	5.10517	8.5333	9.70142	39.7722	13.7548	protein_coding
ENSG00000152990	ADGRA3	12.2032	3.33744	0.694691	4.80421	1.55361e-06	1.85043e-05	1.09071	5.56137	3.55866	1.02371	3.10786	0.782247	1.87678	2.52598	0	62.8319	9.5307	33.5053	6.23036	3.0631	0	17.4626	30.172	37.3343	protein_coding
ENSG00000157315	TMED6	11.6647	3.33226	0.790181	4.21708	2.47481e-05	0.000210504	3.27212	1.85379	2.669	3.07113	0.517977	2.34674	0	5.05196	0	435.743	5.55957	124.966	18.6911	9.18931	1.42222	12.6118	2.05718	11.7898	protein_coding
ENSG00000122861	PLAU	0.87816	3.33131	1.2952	2.57204	0.0101103	0.0351917	0	0	0	0	0	0	0	0	0	2.448	1.58845	0	1.03839	2.04207	2.84443	3.88057	0	1.96496	protein_coding
ENSG00000153391	INO80C	54.4657	3.32987	0.608136	5.47554	4.36186e-08	7.33661e-07	7.63496	6.48827	10.676	12.2845	11.9135	13.2982	1.87678	12.6299	11.0685	384.335	15.0903	34.4108	271.021	8.16828	45.5109	21.3431	87.0875	25.5445	protein_coding
ENSG00000112299	VNN1	10.7703	3.32802	1.08036	3.08048	0.00206669	0.00948044	1.09071	0	3.55866	1.02371	2.07191	0	0	6.73595	2.76714	0	5.55957	17.2054	66.4572	0	0	68.8801	18.5147	0	protein_coding
ENSG00000104147	OIP5	5.88574	3.32529	0.713423	4.66104	3.14621e-06	3.45325e-05	1.09071	0	0	4.09484	1.03595	0.782247	0	2.52598	0	31.8239	4.76535	5.43329	3.11518	12.2524	8.5333	8.73128	17.8289	3.92993	protein_coding
ENSG00000153132	CLGN	2.24223	3.32301	1.34952	2.46235	0.0138028	0.045201	0	0.926896	0	0	0.517977	1.56449	0	0	0	9.79198	0	8.14993	1.03839	0	0	0	0.685728	17.6847	protein_coding
ENSG00000197472	ZNF695	1.38489	3.31839	1.35259	2.45336	0.0141528	0.0461238	0	0	0	0	1.03595	0	0	0	0	8.97598	4.76535	1.8111	0	0	5.68887	0	0.685728	1.96496	protein_coding
ENSG00000159788	RGS12	29.0508	3.31744	0.45032	7.36684	1.74716e-13	7.86587e-12	11.9978	4.63448	8.007	3.07113	1.55393	3.12899	3.75356	10.1039	1.84476	92.2078	61.1553	36.2219	32.1902	49.0097	8.5333	40.746	62.4013	92.3533	protein_coding
ENSG00000174371	EXO1	3.37009	3.31615	0.995864	3.32992	0.000868712	0.00456263	1.09071	0	0	0	0	0	0	2.52598	1.84476	4.89599	19.0614	9.96102	2.07679	0	9.95551	5.82085	3.42864	0	protein_coding
ENSG00000071967	CYBRD1	2.96566	3.30539	1.07642	3.07073	0.00213538	0.00975088	1.09071	0	1.77933	0	0	0	1.87678	0	0.922379	4.89599	7.14802	7.24438	0	7.14724	2.84443	18.4327	0	0	protein_coding
ENSG00000230400	LINC01747	1.74914	3.30061	1.17604	2.80655	0.00500755	0.0199247	0	0	0	0	0.517977	0	0	0	1.84476	13.872	0	3.62219	1.03839	3.0631	0	2.91043	0.685728	3.92993	lncRNA
ENSG00000188130	MAPK12	8.60586	3.29945	0.8307	3.97189	7.13047e-05	0.000535302	2.18142	0	0	1.02371	3.62584	3.91124	3.75356	0	0	2.448	3.1769	2.71664	14.5375	65.3462	4.26665	9.70142	34.2864	3.92993	protein_coding
ENSG00000196371	FUT4	10.0965	3.29128	0.479712	6.86094	6.84071e-12	2.30396e-10	3.27212	1.85379	0.889666	0	2.58989	0	3.75356	4.20997	0.922379	17.952	21.4441	22.6387	8.30715	26.5469	9.95551	25.2237	16.4575	15.7197	protein_coding
ENSG00000158023	WDR66	22.4253	3.28059	0.702692	4.6686	3.0326e-06	3.3432e-05	3.27212	1.85379	4.44833	5.11855	2.58989	6.25798	3.75356	9.26193	0.922379	10.608	23.0325	156.66	7.26875	9.18931	81.0663	19.4028	0	58.9489	protein_coding
ENSG00000132846	ZBED3	39.0192	3.27878	0.414457	7.91104	2.5524e-15	1.5476e-13	15.2699	9.26896	5.338	2.04742	8.28763	2.34674	22.5213	3.36798	0.922379	104.448	73.8629	75.1604	93.4554	68.4093	48.3554	85.3725	30.8578	53.054	protein_coding
ENSG00000022267	FHL1	44.623	3.27767	0.49073	6.67918	2.40287e-11	7.48073e-10	9.81637	12.9765	5.338	7.16597	6.7337	15.6449	1.87678	12.6299	1.84476	6.52799	132.636	86.9326	25.9598	55.1359	52.622	69.8502	179.661	119.863	protein_coding
ENSG00000170293	CMTM8	26.3836	3.27501	0.665942	4.91786	8.7496e-07	1.10934e-05	5.45354	5.56137	4.44833	2.04742	3.62584	2.34674	5.63033	3.36798	11.9909	22.032	144.549	22.6387	3.11518	19.3997	8.5333	21.3431	4.11437	184.707	protein_coding
ENSG00000160957	RECQL4	29.4598	3.2683	0.36578	8.93514	4.06645e-19	4.39908e-17	3.27212	8.34206	3.55866	8.18968	3.62584	8.60472	7.50711	3.36798	4.6119	86.4958	56.39	96.8936	29.075	31.6521	52.622	47.537	56.9154	21.6146	protein_coding
ENSG00000105707	HPN	1.09809	3.2682	1.21201	2.69651	0.00700704	0.0261711	0	0	0	0	0	0.782247	0	0	0	0	1.58845	4.52774	1.03839	5.10517	1.42222	0	1.37146	3.92993	protein_coding
ENSG00000113088	GZMK	4.01005	3.26769	0.937291	3.48631	0.000489728	0.00279577	1.09071	0	0	0	1.03595	0	0	1.68399	2.76714	29.3759	7.14802	6.33883	2.07679	9.18931	0	8.73128	2.74291	0	protein_coding
ENSG00000224086	AC245452.1	4.04188	3.26461	0.750377	4.35062	1.35753e-05	0.000125179	0	1.85379	0.889666	0	1.55393	0.782247	0	0	0.922379	1.632	2.38267	10.8666	5.19197	9.18931	4.26665	3.88057	11.6574	17.6847	lncRNA
ENSG00000156509	FBXO43	1.05158	3.2646	1.32581	2.46234	0.0138035	0.045201	0	0	0.889666	0	0	0	0	0	0	4.89599	0.794225	7.24438	2.07679	0	0	0.970142	2.05718	0	protein_coding
ENSG00000204099	NEU4	30.619	3.26208	0.662175	4.92631	8.3796e-07	1.06602e-05	5.45354	2.78069	16.014	1.02371	1.03595	6.25798	5.63033	10.1039	3.68952	0	68.3033	65.1994	70.6107	8.16828	113.777	9.70142	65.1442	98.2482	protein_coding
ENSG00000166016	ABTB2	2.66529	3.26046	1.32315	2.46417	0.0137332	0.0450297	1.09071	0	0	0	0.517977	0	0	1.68399	0.922379	1.632	0.794225	0	1.03839	13.2735	27.0221	0	0	0	protein_coding
ENSG00000146918	NCAPG2	19.2432	3.25744	0.472961	6.88733	5.68501e-12	1.96068e-10	2.18142	0.926896	3.55866	8.18968	5.17977	2.34674	1.87678	3.36798	4.6119	65.2799	87.3647	19.922	12.4607	18.3786	34.1332	21.3431	19.8861	35.3694	protein_coding
ENSG00000136848	DAB2IP	5.37738	3.25273	1.05013	3.09746	0.00195187	0.00903641	4.36283	0	0	0	0	0.782247	1.87678	0	2.76714	37.5359	11.1191	0	0	1.02103	12.7999	6.79099	15.7717	1.96496	protein_coding
ENSG00000056972	TRAF3IP2	72.9259	3.24277	0.36766	8.82003	1.1443e-18	1.13953e-16	9.81637	18.5379	16.9037	19.4505	10.3595	14.8627	16.891	7.57795	11.9909	332.111	93.7185	144.888	127.722	40.8414	190.577	133.88	59.6583	62.8789	protein_coding
ENSG00000223960	AC009948.1	11.4912	3.23725	0.535765	6.04229	1.51939e-09	3.36978e-08	1.09071	2.78069	1.77933	0	3.10786	5.47573	0	3.36798	0.922379	25.2959	15.0903	14.4888	16.6143	55.1359	19.911	26.1938	11.6574	3.92993	lncRNA
ENSG00000171502	COL24A1	10.448	3.23304	1.03417	3.12623	0.00177065	0.00833864	5.45354	1.85379	1.77933	0	1.03595	0	1.87678	2.52598	3.68952	2.448	0	0.905548	0	67.3883	61.1553	35.8953	2.05718	0	protein_coding
ENSG00000132669	RIN2	7.43976	3.23248	1.03818	3.11359	0.00184826	0.00862846	2.18142	0	0	0	5.17977	0.782247	3.75356	0	0.922379	0	8.73647	0.905548	1.03839	12.2524	58.3109	0	12.3431	27.5095	protein_coding
ENSG00000132749	MTL5	7.45196	3.23118	0.614671	5.25676	1.46614e-07	2.22241e-06	1.09071	0.926896	0.889666	4.09484	2.07191	0.782247	0	0.841994	1.84476	25.2959	6.3538	8.14993	16.6143	29.61	2.84443	21.3431	5.48582	5.89489	protein_coding
ENSG00000155792	DEPTOR	2.6714	3.22477	1.21423	2.65581	0.00791173	0.0288129	2.18142	0.926896	0	0	0.517977	0	0	0	0.922379	0	0	3.62219	1.03839	6.12621	0	28.1341	0.685728	3.92993	protein_coding
ENSG00000079337	RAPGEF3	20.7834	3.22274	0.604871	5.32797	9.93156e-08	1.57367e-06	1.09071	3.70758	2.669	0	3.10786	3.12899	16.891	2.52598	5.53427	13.872	19.8556	13.5832	21.8063	67.3883	8.5333	141.641	21.2576	27.5095	protein_coding
ENSG00000116815	CD58	54.9012	3.21689	0.429763	7.48525	7.14084e-14	3.44156e-12	13.0885	5.56137	10.676	9.21339	11.9135	9.38697	24.3981	8.41994	5.53427	137.088	38.1228	75.1604	107.993	160.302	39.8221	253.207	23.3148	55.019	protein_coding
ENSG00000272777	AC019131.2	1.72515	3.21408	1.18036	2.72296	0.00647006	0.0244902	1.09071	0.926896	0	0	0	0	0	0.841994	0	4.07999	2.38267	14.4888	0	0	0	1.94028	1.37146	3.92993	lncRNA
ENSG00000124570	SERPINB6	83.254	3.21307	0.407059	7.89338	2.94107e-15	1.76195e-13	13.0885	5.56137	15.1243	10.2371	26.9348	7.82247	39.4123	14.3139	15.6804	53.8559	111.191	147.604	192.103	341.026	44.0887	234.774	141.26	84.4935	protein_coding
ENSG00000138778	CENPE	57.8186	3.21289	0.500303	6.42188	1.34603e-10	3.70702e-09	7.63496	4.63448	9.78633	4.09484	6.7337	9.38697	46.9194	13.4719	2.76714	36.7199	115.163	115.005	29.075	35.7362	288.71	97.0142	111.774	106.108	protein_coding
ENSG00000160111	CPAMD8	8.22254	3.21205	0.889794	3.60987	0.000306346	0.00189335	2.18142	3.70758	0.889666	1.02371	2.07191	0	0	3.36798	0.922379	85.6798	0.794225	2.71664	15.5759	1.02103	12.7999	2.91043	12.3431	0	protein_coding
ENSG00000112759	SLC29A1	15.0866	3.2099	0.504449	6.36319	1.97612e-10	5.31572e-09	3.27212	2.78069	0.889666	1.02371	3.62584	3.91124	1.87678	5.05196	3.68952	50.5919	16.6787	41.6552	7.26875	36.7572	5.68887	42.6863	34.2864	9.82482	protein_coding
ENSG00000132016	C19orf57	2.50121	3.20495	0.876134	3.65806	0.000254128	0.00160966	0	0.926896	0	2.04742	1.03595	0	0	0	0	10.608	3.97112	4.52774	4.15357	4.08414	7.11108	1.94028	0.685728	3.92993	protein_coding
ENSG00000240583	AQP1	17.0679	3.2034	0.674488	4.74938	2.0404e-06	2.35468e-05	1.09071	2.78069	4.44833	5.11855	3.10786	0	5.63033	7.57795	0.922379	100.368	21.4441	9.96102	7.26875	8.16828	28.4443	61.119	39.7722	0	protein_coding
ENSG00000134802	SLC43A3	42.6511	3.20223	0.359229	8.91417	4.91494e-19	5.24156e-17	7.63496	4.63448	7.11733	11.2608	10.8775	7.82247	15.0142	8.41994	3.68952	110.976	46.065	129.493	28.0366	43.9045	105.244	38.8057	104.231	84.4935	protein_coding
ENSG00000272720	AL022322.1	2.90766	3.20205	0.857338	3.73488	0.000187806	0.00124025	0	0	0	0	0.517977	1.56449	0	0.841994	1.84476	3.26399	2.38267	5.43329	11.4223	4.08414	0	8.73128	10.2859	1.96496	lncRNA
ENSG00000163808	KIF15	27.7985	3.18982	0.387039	8.24159	1.69935e-16	1.31042e-14	6.54425	3.70758	8.89666	1.02371	7.25168	10.9515	7.50711	1.68399	1.84476	37.5359	102.455	47.994	30.1134	31.6521	59.7331	48.5071	57.6012	35.3694	protein_coding
ENSG00000029993	HMGB3	39.1598	3.17371	0.437218	7.25888	3.90306e-13	1.65642e-11	4.36283	7.41516	13.345	13.3082	2.58989	4.69348	16.891	9.26193	0.922379	97.9198	114.368	136.738	35.3054	32.6731	28.4443	40.746	69.2585	76.6336	protein_coding
ENSG00000044459	CNTLN	63.2134	3.17328	0.351022	9.04012	1.56501e-19	1.8677e-17	16.3606	9.26896	17.7933	7.16597	12.4315	12.516	15.0142	9.26193	13.8357	29.3759	65.9207	136.738	65.4188	111.293	69.6886	150.372	155.66	239.726	protein_coding
ENSG00000132470	ITGB4	1.65556	3.17293	0.962515	3.2965	0.000978968	0.00505347	0	0.926896	0	0	0.517977	0	0	0	0.922379	4.89599	5.55957	1.8111	3.11518	0	2.84443	1.94028	1.37146	5.89489	protein_coding
ENSG00000185442	FAM174B	7.62763	3.17264	0.74919	4.23476	2.288e-05	0.000197161	1.09071	0.926896	0.889666	0	0.517977	3.91124	1.87678	3.36798	0.922379	6.52799	3.1769	7.24438	11.4223	2.04207	72.533	4.85071	6.17155	9.82482	protein_coding
ENSG00000197471	SPN	445.277	3.16739	0.395279	8.01307	1.11881e-15	7.37876e-14	89.4381	48.1986	87.1873	26.6165	102.559	61.0153	114.483	106.933	166.951	332.111	507.51	800.504	1642.74	1434.55	216.177	1248.57	740.586	288.85	protein_coding
ENSG00000182463	TSHZ2	2.00077	3.16493	1.09793	2.88264	0.00394355	0.0164173	0	0.926896	0	2.04742	0.517977	0	0	0	0	3.26399	3.97112	13.5832	7.26875	2.04207	1.42222	0.970142	0	0	protein_coding
ENSG00000161800	RACGAP1	6.30371	3.16368	0.765818	4.13111	3.61016e-05	0.000294233	3.27212	0.926896	0	0	2.07191	0	1.87678	1.68399	1.84476	29.3759	15.8845	7.24438	0	7.14724	15.6444	15.5223	10.9716	0	protein_coding
ENSG00000147872	PLIN2	241.321	3.15999	0.516728	6.11538	9.63288e-10	2.24573e-08	70.896	46.3448	30.2486	21.4979	29.5247	17.9917	114.483	48.8357	59.0323	135.456	358.99	288.87	155.759	107.209	1070.93	95.0739	193.375	1499.27	protein_coding
ENSG00000115738	ID2	368.454	3.15647	0.541883	5.82501	5.71104e-09	1.14198e-07	97.073	44.491	73.8423	26.6165	45.582	25.8142	95.7157	116.195	143.891	53.0399	330.397	131.304	1553.44	318.563	2417.77	330.818	344.235	483.381	protein_coding
ENSG00000164904	ALDH7A1	16.3427	3.14763	0.524261	6.00395	1.92575e-09	4.20282e-08	4.36283	1.85379	7.11733	6.14226	1.55393	0.782247	0	5.89396	1.84476	78.3358	9.5307	39.8441	13.4991	30.631	22.7555	38.8057	9.60019	21.6146	protein_coding
ENSG00000133026	MYH10	16.7733	3.14674	0.769662	4.08847	4.3422e-05	0.000346018	5.45354	1.85379	5.338	6.14226	3.62584	0	0	6.73595	0.922379	84.8638	7.94225	26.2609	4.15357	6.12621	48.3554	13.582	0	80.5635	protein_coding
ENSG00000267365	KCNJ2-AS1	2.12198	3.14409	1.24398	2.52744	0.0114898	0.0389566	0	0	0	0	0	0	0	1.68399	1.84476	1.632	12.7076	4.52774	0	0	8.5333	0	1.37146	5.89489	lncRNA
ENSG00000177706	FAM20C	8.19417	3.14156	0.915813	3.43035	0.0006028	0.00333124	4.36283	0	1.77933	0	5.17977	1.56449	1.87678	0	0	0	4.76535	45.2774	5.19197	54.1148	1.42222	10.6716	504.01	7.85986	protein_coding
ENSG00000140931	CMTM3	110.523	3.14098	0.248266	12.6517	1.0951e-36	7.84146e-34	15.2699	24.0993	22.2417	17.4031	26.4168	14.8627	35.6588	28.6278	20.2923	194.208	187.437	184.732	100.724	250.153	224.71	219.252	311.321	112.003	protein_coding
ENSG00000271882	AP001330.5	0.980168	3.13198	1.18161	2.65061	0.00803465	0.0291885	0	0	0	1.02371	0	0	0	0	0	1.632	0.794225	2.71664	1.03839	0	2.84443	4.85071	2.74291	0	lncRNA
ENSG00000089692	LAG3	1.74942	3.12983	1.12952	2.77094	0.00558956	0.0217859	0	0	0	0	0	0	3.75356	0	0.922379	0.815998	1.58845	0.905548	3.11518	10.2103	1.42222	6.79099	0	1.96496	protein_coding
ENSG00000149554	CHEK1	29.1107	3.12777	0.346656	9.02269	1.8352e-19	2.13922e-17	4.36283	3.70758	3.55866	5.11855	7.25168	8.60472	9.38389	7.57795	4.6119	44.0639	98.4839	74.2549	25.9598	31.6521	69.6886	32.0147	44.5723	49.1241	protein_coding
ENSG00000005379	BZRAP1	88.7705	3.12704	0.408118	7.66211	1.82909e-14	9.54999e-13	23.9956	12.0496	20.4623	25.5928	21.2371	15.6449	1.87678	27.7858	13.8357	106.896	166.787	121.343	263.752	304.268	41.2443	296.863	57.6012	76.6336	protein_coding
ENSG00000103269	RHBDL1	2.79215	3.12486	0.916373	3.41003	0.000649551	0.00355304	0	0	0	2.04742	0.517977	2.34674	0	0	0	17.136	3.97112	9.05548	1.03839	5.10517	1.42222	2.91043	2.74291	1.96496	protein_coding
ENSG00000163814	CDCP1	3.63593	3.12438	1.1387	2.74382	0.0060729	0.0232489	1.09071	0	2.669	0	1.03595	0	0	1.68399	0	0	0.794225	0	1.03839	19.3997	5.68887	8.73128	23.3148	0	protein_coding
ENSG00000074706	IPCEF1	26.1357	3.11756	0.678586	4.5942	4.34421e-06	4.58413e-05	13.0885	0	10.676	0	6.7337	2.34674	1.87678	3.36798	10.1462	26.9279	37.3286	105.044	13.4991	3.0631	27.0221	6.79099	120.002	82.5285	protein_coding
ENSG00000127423	AUNIP	1.58613	3.11445	1.24206	2.50749	0.0121594	0.0408125	0	0	0	0	0	0	0	0	2.76714	4.07999	7.94225	3.62219	0	4.08414	0	1.94028	4.11437	0	protein_coding
ENSG00000118292	C1orf54	12.8105	3.11052	0.641914	4.84569	1.26171e-06	1.54876e-05	4.36283	0	0.889666	5.11855	1.55393	3.12899	1.87678	2.52598	4.6119	10.608	20.6498	3.62219	16.6143	89.8511	31.2888	23.2834	2.74291	7.85986	protein_coding
ENSG00000145014	TMEM44	7.78189	3.10875	0.719023	4.32358	1.53518e-05	0.000138831	3.27212	0	0	1.02371	0.517977	0.782247	7.50711	1.68399	1.84476	17.952	4.76535	0.905548	28.0366	24.5048	5.68887	25.2237	14.4003	1.96496	protein_coding
ENSG00000125170	DOK4	11.55	3.10647	0.533228	5.82578	5.68453e-09	1.13819e-07	4.36283	1.85379	3.55866	0	2.07191	0.782247	7.50711	2.52598	0.922379	37.5359	10.3249	26.2609	30.1134	15.3155	4.26665	36.8654	15.7717	7.85986	protein_coding
ENSG00000139318	DUSP6	181.193	3.10568	0.330849	9.38702	6.17239e-21	8.92444e-19	28.3584	25.9531	39.1453	48.1144	35.7404	47.7171	46.9194	34.5218	33.2056	248.879	109.603	191.976	462.085	212.375	368.354	697.532	122.06	508.926	protein_coding
ENSG00000152455	SUV39H2	2.56805	3.10549	0.936715	3.3153	0.000915455	0.00477147	2.18142	0	0	1.02371	0	1.56449	0	0	0	4.07999	4.76535	9.05548	2.07679	0	8.5333	0.970142	4.11437	7.85986	protein_coding
ENSG00000130830	MPP1	109.327	3.09731	0.455771	6.79576	1.0774e-11	3.52194e-10	28.3584	8.34206	25.8003	16.3794	47.1359	21.9029	16.891	26.9438	12.9133	265.199	208.087	482.657	123.569	254.238	27.0221	193.058	24.6862	184.707	protein_coding
ENSG00000130052	STARD8	5.63606	3.09441	0.876334	3.53108	0.000413863	0.00243571	3.27212	0	0.889666	0	1.03595	1.56449	3.75356	0	0.922379	0	3.1769	27.1664	3.11518	25.5259	1.42222	20.373	1.37146	7.85986	protein_coding
ENSG00000274641	HIST1H2BO	2.54602	3.0891	1.04948	2.94346	0.00324563	0.0139601	0	0	0.889666	0	0	1.56449	1.87678	0	0.922379	1.632	7.94225	1.8111	2.07679	1.02103	22.7555	0	1.37146	1.96496	protein_coding
ENSG00000152078	TMEM56	6.62401	3.08893	0.938197	3.29241	0.000993318	0.00512051	2.18142	0.926896	5.338	2.04742	1.03595	0	0	0	0.922379	20.4	0	19.922	5.19197	5.10517	5.68887	48.5071	0	1.96496	protein_coding
ENSG00000100902	PSMA6	47.5964	3.08648	0.424908	7.26388	3.76155e-13	1.61147e-11	19.6327	8.34206	3.55866	7.16597	5.17977	4.69348	24.3981	7.57795	12.9133	35.9039	94.5127	107.76	150.567	47.9886	24.1777	140.671	41.8294	119.863	protein_coding
ENSG00000104738	MCM4	74.7107	3.08645	0.275676	11.196	4.26778e-29	1.6455e-26	14.1792	10.1959	21.352	10.2371	17.0932	14.0805	20.6446	21.0499	13.8357	109.344	200.939	243.592	78.9179	109.251	112.355	135.82	139.203	72.7037	protein_coding
ENSG00000162104	ADCY9	6.02937	3.08295	0.897627	3.43456	0.000593517	0.0032884	1.09071	0	0	1.02371	2.07191	0	0	6.73595	0	1.632	11.9134	3.62219	34.267	1.02103	7.11108	0.970142	23.3148	13.7548	protein_coding
ENSG00000235688	AC116614.1	8.64815	3.08264	0.873296	3.52989	0.000415726	0.0024419	0	0	0.889666	2.04742	5.17977	0.782247	1.87678	5.05196	0	18.768	11.9134	2.71664	7.26875	0	83.9108	3.88057	5.48582	5.89489	lncRNA
ENSG00000175305	CCNE2	13.6075	3.08195	0.640143	4.81448	1.47587e-06	1.76975e-05	4.36283	1.85379	3.55866	2.04742	0	3.91124	1.87678	0	8.30141	3.26399	50.0362	17.2054	28.0366	4.08414	28.4443	19.4028	9.60019	58.9489	protein_coding
ENSG00000160781	PAQR6	9.46578	3.08076	0.49975	6.16459	7.06638e-10	1.68395e-08	5.45354	1.85379	0.889666	0	2.58989	4.69348	0	1.68399	0	8.15998	15.8845	14.4888	11.4223	15.3155	19.911	19.4028	32.9149	15.7197	protein_coding
ENSG00000111266	DUSP16	18.8548	3.0789	0.746794	4.12282	3.74256e-05	0.000304035	3.27212	0.926896	3.55866	2.04742	4.66179	0	15.0142	4.20997	3.68952	10.608	7.14802	9.05548	0	9.18931	95.2885	16.4924	109.031	45.1942	protein_coding
ENSG00000065534	MYLK	49.0372	3.07804	0.565796	5.44018	5.32257e-08	8.81447e-07	16.3606	5.56137	9.78633	9.21339	11.9135	3.12899	15.0142	21.0499	1.84476	51.4079	57.1842	3.62219	139.145	79.6407	230.399	177.536	16.4575	33.4044	protein_coding
ENSG00000145730	PAM	12.6846	3.07732	0.784997	3.92017	8.84866e-05	0.000645283	1.09071	0.926896	7.11733	2.04742	3.62584	0.782247	1.87678	1.68399	4.6119	3.26399	3.97112	5.43329	1.03839	27.5679	133.688	19.4028	8.22874	1.96496	protein_coding
ENSG00000163701	IL17RE	6.00108	3.07585	0.845049	3.63985	0.0002728	0.00171134	3.27212	0	0.889666	0	1.55393	0	7.50711	0	0	3.26399	0.794225	13.5832	3.11518	26.5469	2.84443	25.2237	9.60019	9.82482	protein_coding
ENSG00000221988	NA_33	3.86866	3.07497	0.733145	4.19422	2.73815e-05	0.000230148	1.09071	0.926896	0	0	0.517977	0.782247	1.87678	0.841994	1.84476	5.71199	2.38267	17.2054	1.03839	9.18931	4.26665	10.6716	3.42864	7.85986	protein_coding
ENSG00000187942	LDLRAD2	5.73433	3.07371	0.88545	3.47136	0.000517837	0.00293949	3.27212	2.78069	0	1.02371	1.55393	0.782247	1.87678	0	0	5.71199	4.76535	0	7.26875	44.9255	7.11108	19.4028	2.74291	0	protein_coding
ENSG00000184194	GPR173	9.03494	3.0719	0.765644	4.01218	6.01606e-05	0.000461313	1.09071	1.85379	3.55866	3.07113	2.07191	1.56449	3.75356	0.841994	0	22.848	6.3538	51.6162	31.1518	1.02103	4.26665	26.1938	1.37146	0	protein_coding
ENSG00000131042	LILRB2	147.603	3.07128	0.45022	6.82175	8.99395e-12	2.98548e-10	70.896	12.0496	28.4693	5.11855	38.8483	17.2094	18.7678	27.7858	62.7218	178.704	125.488	306.981	172.373	122.524	210.488	96.0441	667.213	495.171	protein_coding
ENSG00000181826	RELL1	45.8543	3.07121	0.772821	3.97402	7.06704e-05	0.000531867	30.5398	4.63448	1.77933	6.14226	5.17977	6.25798	1.87678	2.52598	28.5938	0.815998	174.729	18.111	98.6474	5.10517	248.888	6.79099	15.7717	168.987	protein_coding
ENSG00000085063	CD59	41.0356	3.07105	0.530694	5.78686	7.17146e-09	1.41148e-07	6.54425	1.85379	10.676	8.18968	11.3955	7.82247	7.50711	16.8399	7.37903	114.24	70.686	86.9326	32.1902	122.524	28.4443	186.267	3.42864	15.7197	protein_coding
ENSG00000176597	B3GNT5	17.3992	3.06915	0.725924	4.22793	2.35855e-05	0.000202429	6.54425	0	0	2.04742	2.07191	4.69348	3.75356	0.841994	13.8357	7.34399	41.2997	5.43329	30.1134	11.2314	15.6444	18.4327	144.003	5.89489	protein_coding
ENSG00000244734	HBB	12288.4	3.06505	0.945227	3.24266	0.0011842	0.00594756	4770.76	185.379	12535.4	2335.08	1261.79	589.032	37.5356	731.693	1162.2	98824.7	7584.05	22424.1	11049.5	1349.81	12313.5	43212.1	438.18	387.098	protein_coding
ENSG00000226791	AC109826.1	8.70198	3.06367	0.711345	4.30688	1.65576e-05	0.000148465	4.36283	0.926896	0.889666	0	2.58989	0	1.87678	5.05196	0.922379	2.448	19.0614	47.0885	8.30715	9.18931	7.11108	0.970142	14.4003	31.4394	lncRNA
ENSG00000271938	AC103724.4	15.1684	3.0628	0.599034	5.1129	3.17258e-07	4.44135e-06	0	4.63448	3.55866	6.14226	2.07191	2.34674	1.87678	3.36798	4.6119	39.9839	19.0614	24.4498	7.26875	7.14724	55.4664	9.70142	2.74291	78.5986	lncRNA
ENSG00000073111	MCM2	73.5321	3.0616	0.445434	6.87329	6.27372e-12	2.14893e-10	11.9978	10.1959	21.352	17.4031	20.7191	23.4674	1.87678	12.6299	20.2923	451.247	57.9784	143.982	143.298	92.9142	54.0442	145.521	51.4296	43.2292	protein_coding
ENSG00000104081	BMF	62.6022	3.06098	0.564243	5.42494	5.79743e-08	9.52743e-07	4.36283	5.56137	10.676	14.3319	15.0213	15.6449	20.6446	21.8918	12.9133	345.167	165.993	13.5832	44.6509	13.2735	11.3777	64.9995	224.919	121.828	protein_coding
ENSG00000177303	CASKIN2	8.20937	3.06086	0.574923	5.32395	1.01538e-07	1.6055e-06	3.27212	1.85379	1.77933	0	2.07191	1.56449	1.87678	1.68399	1.84476	21.216	7.14802	27.1664	19.7295	15.3155	1.42222	27.164	4.8001	7.85986	protein_coding
ENSG00000164237	CMBL	2.00657	3.05217	1.23868	2.46405	0.0137375	0.045034	0	0	1.77933	0	0	0	0	0	1.84476	0	3.1769	6.33883	0	5.10517	4.26665	11.6417	0	1.96496	protein_coding
ENSG00000241666	AL031733.2	34.4122	3.05178	0.69294	4.4041	1.06224e-05	0.000101609	5.45354	4.63448	0.889666	5.11855	4.66179	2.34674	18.7678	0	25.8266	4.07999	50.0362	17.2054	157.836	17.3576	82.4886	28.1341	15.7717	178.812	lncRNA
ENSG00000138795	LEF1	129.294	3.04561	0.618069	4.92761	8.32396e-07	1.06074e-05	47.9912	10.1959	40.9246	17.4031	32.1146	17.9917	11.2607	18.5239	54.4204	384.335	317.69	505.296	205.602	78.6197	8.5333	86.3426	2.74291	487.311	protein_coding
ENSG00000180263	FGD6	8.82361	3.0455	0.605908	5.02635	4.99907e-07	6.70572e-06	1.09071	0	3.55866	6.14226	0.517977	0	1.87678	0.841994	3.68952	4.89599	30.9748	7.24438	18.6911	14.2945	32.711	6.79099	13.7146	11.7898	protein_coding
ENSG00000245848	CEBPA	26.5768	3.04468	0.744921	4.08725	4.36515e-05	0.000347479	2.18142	6.48827	1.77933	3.07113	8.28763	1.56449	3.75356	6.73595	17.5252	8.15998	13.5018	4.52774	252.33	82.7038	17.0666	28.1341	20.5718	0	protein_coding
ENSG00000124343	XG	1.52287	3.04278	1.07633	2.827	0.00469862	0.0189114	1.09071	0	0	0	0.517977	0	0	0	0.922379	5.71199	0	5.43329	1.03839	2.04207	2.84443	3.88057	0	3.92993	protein_coding
ENSG00000131080	EDA2R	1.54805	3.03976	1.04556	2.90729	0.00364574	0.0153862	1.09071	0	0	0	0.517977	0.782247	0	0	0	0	2.38267	5.43329	2.07679	0	5.68887	1.94028	2.05718	5.89489	protein_coding
ENSG00000130821	SLC6A8	2.31073	3.03569	1.0792	2.8129	0.00490962	0.0195998	1.09071	0	1.77933	0	0.517977	0	0	0.841994	0	9.79198	5.55957	0.905548	1.03839	0	14.2222	3.88057	0	1.96496	protein_coding
ENSG00000164930	FZD6	4.33369	3.03494	1.01341	2.99477	0.0027465	0.0121041	0	0	0	2.04742	2.58989	0.782247	0	1.68399	0.922379	18.768	19.8556	0.905548	0	10.2103	5.68887	14.5521	0	0	protein_coding
ENSG00000134369	NAV1	265.565	3.03153	0.28915	10.4843	1.02025e-25	2.37669e-23	89.4381	71.371	40.035	55.2803	64.2292	66.491	65.6872	37.0477	32.2833	341.903	362.166	734.399	523.35	402.288	164.977	308.505	819.445	601.279	protein_coding
ENSG00000205730	ITPRIPL2	41.8063	3.03078	0.636636	4.76062	1.93002e-06	2.24106e-05	5.45354	12.9765	13.345	6.14226	16.5753	3.91124	9.38389	10.1039	3.68952	0	55.5957	110.477	2.07679	99.0404	28.4443	78.5815	131.66	165.057	protein_coding
ENSG00000151062	CACNA2D4	43.4971	3.02912	0.735978	4.11578	3.85879e-05	0.000311458	7.63496	13.9034	9.78633	5.11855	12.4315	3.12899	9.38389	7.57795	16.6028	8.15998	46.8593	8.14993	48.8045	11.2314	1.42222	9.70142	506.067	56.984	protein_coding
ENSG00000071539	TRIP13	2.9042	3.02827	0.860867	3.51769	0.000435317	0.00254262	1.09071	0	0	4.09484	0	0	0	0	0.922379	10.608	6.3538	8.14993	1.03839	6.12621	2.84443	2.91043	6.17155	1.96496	protein_coding
ENSG00000198901	PRC1	70.4179	3.02002	0.465168	6.49232	8.45239e-11	2.40717e-09	13.0885	16.6841	15.1243	12.2845	11.3955	17.9917	33.782	9.26193	11.0685	68.5439	192.202	86.027	45.6893	25.5259	432.354	47.537	52.1153	176.847	protein_coding
ENSG00000010327	STAB1	23.4283	3.01941	0.703045	4.29475	1.74888e-05	0.000155978	6.54425	5.56137	1.77933	1.02371	16.0573	4.69348	1.87678	7.57795	0	21.216	9.5307	33.5053	31.1518	148.05	0	73.7308	10.2859	49.1241	protein_coding
ENSG00000187824	TMEM220	9.0421	3.01843	0.623216	4.84331	1.27695e-06	1.56491e-05	1.09071	2.78069	1.77933	2.04742	2.58989	1.56449	3.75356	2.52598	0	31.0079	4.76535	15.3943	15.5759	13.2735	0	32.9848	4.11437	27.5095	protein_coding
ENSG00000261888	AC144831.1	1.73112	3.01638	1.06371	2.83571	0.00457235	0.0185085	1.09071	0	0	0	1.55393	0	0	0	0	4.89599	0.794225	1.8111	1.03839	4.08414	7.11108	4.85071	0	3.92993	lncRNA
ENSG00000205593	DENND6B	63.563	3.0143	0.609217	4.94783	7.50465e-07	9.62862e-06	15.2699	18.5379	8.89666	8.18968	13.9854	7.82247	26.2749	13.4719	14.7581	17.136	38.1228	16.2999	49.8429	111.293	19.911	76.6412	656.242	31.4394	protein_coding
ENSG00000159259	CHAF1B	14.0768	3.0129	0.530533	5.67901	1.35478e-08	2.53067e-07	3.27212	3.70758	1.77933	7.16597	1.55393	1.56449	9.38389	0	1.84476	34.2719	54.0073	35.3164	5.19197	16.3366	19.911	11.6417	13.0288	33.4044	protein_coding
ENSG00000181104	F2R	5.00262	3.00967	0.723669	4.15891	3.19775e-05	0.000265368	2.18142	0.926896	0.889666	0	1.03595	0.782247	1.87678	2.52598	0	9.79198	12.7076	2.71664	29.075	4.08414	7.11108	7.76114	0.685728	5.89489	protein_coding
ENSG00000130270	ATP8B3	4.36474	3.00933	0.660727	4.55458	5.24915e-06	5.42878e-05	0	0	0.889666	0	0.517977	2.34674	0	1.68399	2.76714	9.79198	3.1769	3.62219	11.4223	15.3155	7.11108	7.76114	8.22874	3.92993	protein_coding
ENSG00000145555	MYO10	10.6397	2.99654	1.0519	2.84869	0.00438994	0.0179282	2.18142	1.85379	0	0	2.07191	0.782247	9.38389	5.05196	0.922379	128.928	0	0.905548	1.03839	4.08414	14.2222	19.4028	0.685728	0	protein_coding
ENSG00000095637	SORBS1	3.18735	2.99585	1.03378	2.89794	0.00375621	0.0157683	2.18142	0	0	0	1.03595	1.56449	1.87678	0	0	8.97598	2.38267	1.8111	9.34554	0	21.3332	0.970142	0	5.89489	protein_coding
ENSG00000124313	IQSEC2	13.5455	2.99505	0.553144	5.4146	6.14251e-08	1.00397e-06	2.18142	1.85379	1.77933	0	5.17977	1.56449	0	3.36798	10.1462	30.1919	29.3863	15.3943	11.4223	44.9255	2.84443	15.5223	42.5151	25.5445	protein_coding
ENSG00000180891	CUEDC1	6.1411	2.99428	0.779004	3.84372	0.000121181	0.000844192	3.27212	0	0.889666	0	2.58989	0.782247	0	2.52598	1.84476	0.815998	3.97112	27.1664	7.26875	17.3576	0	8.73128	27.4291	5.89489	protein_coding
ENSG00000100320	RBFOX2	3.47608	2.99351	1.04774	2.85711	0.00427516	0.0175356	1.09071	0	0.889666	0	0.517977	0.782247	0	3.36798	0	4.07999	0	2.71664	3.11518	7.14724	18.4888	20.373	0	0	protein_coding
ENSG00000165092	ALDH1A1	9.32906	2.98532	0.886445	3.36774	0.000757868	0.00405698	1.09071	0.926896	4.44833	2.04742	3.10786	0	1.87678	2.52598	2.76714	74.2558	1.58845	5.43329	2.07679	9.18931	7.11108	49.4772	0	0	protein_coding
ENSG00000130304	SLC27A1	14.2447	2.9773	0.535435	5.56053	2.68952e-08	4.7246e-07	4.36283	5.56137	4.44833	0	5.17977	0	1.87678	2.52598	4.6119	31.0079	15.8845	23.5442	49.8429	28.589	17.0666	31.0445	30.8578	0	protein_coding
ENSG00000006534	ALDH3B1	42.5395	2.97562	0.632575	4.70399	2.55132e-06	2.8566e-05	13.0885	2.78069	7.11733	2.04742	21.755	1.56449	7.50711	4.20997	25.8266	3.26399	63.538	122.249	59.1884	221.565	4.26665	61.119	99.4306	45.1942	protein_coding
ENSG00000234509	AP000253.1	1.51942	2.97379	0.984889	3.01941	0.00253264	0.0112739	0	0	0.889666	0	0	0	1.87678	0.841994	0	1.632	2.38267	4.52774	5.19197	4.08414	4.26665	0.970142	0.685728	0	lncRNA
ENSG00000164292	RHOBTB3	27.197	2.97367	0.642944	4.62507	3.74463e-06	4.02077e-05	11.9978	3.70758	8.89666	6.14226	4.66179	2.34674	5.63033	7.57795	4.6119	4.89599	4.76535	4.52774	84.1099	14.2945	106.666	73.7308	135.088	5.89489	protein_coding
ENSG00000085840	ORC1	6.17061	2.96953	0.570747	5.20288	1.96223e-07	2.88709e-06	2.18142	0	1.77933	2.04742	1.55393	1.56449	1.87678	0	1.84476	16.32	17.4729	6.33883	5.19197	7.14724	22.7555	4.85071	10.2859	7.85986	protein_coding
ENSG00000227191	TRGC2	4.05226	2.96858	0.857414	3.46224	0.00053569	0.00302145	0	0	0.889666	0	0.517977	1.56449	1.87678	0	3.68952	13.056	3.97112	1.8111	9.34554	10.2103	0	17.4626	0.685728	7.85986	TR_C_gene
ENSG00000274859	AC131238.1	0.863131	2.96452	1.21515	2.43964	0.014702	0.0476452	0	0	0	0	0	0.782247	0	0	0	0.815998	1.58845	0.905548	0	4.08414	1.42222	3.88057	2.05718	0	lncRNA
ENSG00000225783	MIAT	8.07674	2.95786	0.649709	4.55259	5.29899e-06	5.46509e-05	3.27212	3.70758	0.889666	1.02371	0	0	3.75356	5.05196	0	12.24	23.0325	7.24438	34.267	12.2524	4.26665	22.3133	6.17155	5.89489	lncRNA
ENSG00000123416	TUBA1B	1698.27	2.95692	0.364475	8.11282	4.94579e-16	3.52464e-14	295.582	363.343	329.176	569.183	355.85	290.996	534.882	447.099	303.463	6454.55	8041.53	2748.34	1273.07	2000.21	1979.73	1319.39	2250.56	1011.96	protein_coding
ENSG00000066056	TIE1	12.5258	2.95565	0.644041	4.58923	4.44882e-06	4.67238e-05	3.27212	1.85379	3.55866	0	2.07191	0	7.50711	6.73595	1.84476	32.6399	36.5343	24.4498	15.5759	42.8835	2.84443	17.4626	0.685728	25.5445	protein_coding
ENSG00000087077	TRIP6	27.9454	2.95529	0.470032	6.28742	3.22787e-10	8.18508e-09	3.27212	5.56137	4.44833	10.2371	6.21573	6.25798	5.63033	10.1039	5.53427	79.1518	9.5307	50.7107	3.11518	34.7152	68.2664	70.8204	82.2874	47.1591	protein_coding
ENSG00000118137	APOA1	4.16522	2.95506	0.645555	4.57756	4.70439e-06	4.90908e-05	2.18142	0.926896	0.889666	0	2.07191	0.782247	0	0.841994	0	4.07999	3.97112	7.24438	14.5375	7.14724	5.68887	10.6716	4.11437	9.82482	protein_coding
ENSG00000261202	Z83847.1	1.52912	2.95471	1.16088	2.54524	0.0109204	0.0374396	1.09071	0.926896	0	0	0.517977	0	0	0	0	0.815998	0	0	2.07679	1.02103	5.68887	2.91043	0.685728	11.7898	lncRNA
ENSG00000100479	POLE2	3.62638	2.95339	0.816132	3.61877	0.000296011	0.00184006	2.18142	0.926896	0	1.02371	0	0	5.63033	0	0	7.34399	7.94225	14.4888	1.03839	5.10517	1.42222	6.79099	5.48582	5.89489	protein_coding
ENSG00000164877	MICALL2	3.01446	2.95218	0.915185	3.22577	0.00125635	0.00624931	0	0	0	2.04742	1.03595	0.782247	1.87678	0	0.922379	1.632	7.94225	2.71664	1.03839	14.2945	1.42222	16.4924	2.05718	0	protein_coding
ENSG00000166963	MAP1A	45.0752	2.95027	0.691681	4.26536	1.99583e-05	0.000174756	27.2677	0	9.78633	5.11855	11.9135	4.69348	20.6446	14.3139	0	93.0238	10.3249	40.7496	147.452	115.377	17.0666	149.402	2.74291	141.477	protein_coding
ENSG00000128849	CGNL1	2.14574	2.94627	1.20812	2.43871	0.0147397	0.0477366	0	0	0.889666	1.02371	0.517977	0	0	1.68399	0	0	0.794225	1.8111	23.883	0	0	1.94028	4.11437	1.96496	protein_coding
ENSG00000168496	FEN1	40.2806	2.94345	0.444683	6.61921	3.61115e-11	1.09257e-09	5.45354	6.48827	8.89666	11.2608	10.8775	14.8627	5.63033	10.9459	8.30141	239.088	105.632	80.5937	14.5375	43.9045	41.2443	43.6564	36.3436	37.3343	protein_coding
ENSG00000164116	GUCY1A3	30.6399	2.94298	0.40297	7.30322	2.80967e-13	1.24262e-11	14.1792	6.48827	4.44833	5.11855	6.21573	7.04023	11.2607	9.26193	0.922379	36.7199	29.3863	63.3883	124.607	89.8511	32.711	46.5668	39.7722	23.5796	protein_coding
ENSG00000170180	GYPA	7.56364	2.93992	0.931631	3.15567	0.00160129	0.00764401	5.45354	0	2.669	6.14226	1.55393	0	0	0	0	44.8799	13.5018	9.96102	8.30715	1.02103	9.95551	32.0147	0.685728	0	protein_coding
ENSG00000107485	GATA3	102.466	2.93793	0.67448	4.35584	1.32559e-05	0.0001235	45.8097	11.1227	19.5727	5.11855	28.4887	11.7337	30.0284	35.3638	25.8266	26.9279	134.224	14.4888	752.835	12.2524	520.531	119.327	21.2576	29.4745	protein_coding
ENSG00000052795	FNIP2	29.6062	2.93739	0.4583	6.40932	1.46166e-10	3.99618e-09	6.54425	5.56137	0.889666	2.04742	10.8775	0.782247	13.1374	4.20997	18.4476	21.216	64.3322	52.5218	20.7679	52.0728	72.533	66.9398	76.8015	43.2292	protein_coding
ENSG00000183785	TUBA8	23.8371	2.93008	0.681156	4.30163	1.69546e-05	0.000151562	8.72566	0.926896	1.77933	7.16597	13.9854	0.782247	1.87678	9.26193	4.6119	4.07999	84.1878	98.7047	18.6911	3.0631	29.8665	5.82085	115.888	19.6496	protein_coding
ENSG00000186197	EDARADD	2.95495	2.92718	1.14449	2.55762	0.010539	0.0363984	3.27212	0.926896	0	0	1.03595	0	0	0.841994	0	6.52799	0	0.905548	28.0366	1.02103	0	5.82085	4.8001	0	protein_coding
ENSG00000164465	DCBLD1	7.23453	2.92333	0.803237	3.63944	0.000273234	0.00171264	2.18142	0	0.889666	0	1.03595	2.34674	3.75356	1.68399	3.68952	3.26399	34.9459	6.33883	2.07679	5.10517	0	28.1341	1.37146	33.4044	protein_coding
ENSG00000110080	ST3GAL4	4.20096	2.9189	0.892355	3.27101	0.00107164	0.00547283	0	0.926896	2.669	0	1.03595	1.56449	1.87678	0	0.922379	0	12.7076	0.905548	4.15357	31.6521	1.42222	9.70142	4.11437	1.96496	protein_coding
ENSG00000258227	CLEC5A	5.8225	2.91785	0.934415	3.12265	0.00179231	0.00842218	0	0.926896	1.77933	0	2.07191	0.782247	5.63033	0	1.84476	0.815998	3.97112	59.7661	0	6.12621	1.42222	5.82085	2.05718	11.7898	protein_coding
ENSG00000174807	CD248	2.78804	2.91621	1.05714	2.75859	0.00580514	0.0224285	0	0	0.889666	0	0.517977	0	3.75356	1.68399	0	4.07999	3.97112	0.905548	1.03839	1.02103	27.0221	0	65.1442	3.92993	protein_coding
ENSG00000055118	KCNH2	5.88872	2.91608	0.883266	3.30148	0.000961767	0.00498349	1.09071	0	0.889666	1.02371	1.55393	1.56449	0	5.89396	0	14.688	5.55957	44.3718	1.03839	6.12621	1.42222	19.4028	1.37146	0	protein_coding
ENSG00000135679	MDM2	339.179	2.91529	0.386837	7.5362	4.83847e-14	2.40119e-12	70.896	66.7365	91.6356	67.5649	90.128	95.4342	97.5924	85.8834	48.8861	1198.7	1293.79	671.011	346.823	235.859	182.044	329.848	144.003	988.377	protein_coding
ENSG00000131470	PSMC3IP	9.98098	2.91028	0.614282	4.7377	2.16159e-06	2.46428e-05	1.09071	0.926896	0.889666	0	3.10786	6.25798	9.38389	0	0.922379	44.8799	17.4729	31.6942	5.19197	9.18931	14.2222	9.70142	10.9716	13.7548	protein_coding
ENSG00000124191	TOX2	46.1224	2.90962	0.535431	5.43415	5.50569e-08	9.08771e-07	16.3606	4.63448	8.007	11.2608	11.3955	6.25798	7.50711	15.1559	16.6028	46.5119	181.877	53.4273	59.1884	2.04207	73.9553	9.70142	141.26	165.057	protein_coding
ENSG00000224152	AC009506.1	3.84959	2.9091	0.804591	3.61562	0.000299625	0.00185716	0	0.926896	1.77933	0	2.07191	0	0	1.68399	0.922379	12.24	2.38267	9.05548	6.23036	7.14724	17.0666	5.82085	0	1.96496	lncRNA
ENSG00000171105	INSR	160.762	2.90581	0.503835	5.76738	8.05123e-09	1.56532e-07	39.2655	16.6841	50.711	52.2092	43.5101	27.3787	50.673	41.2577	19.37	422.687	324.044	153.943	568.001	8.16828	65.422	72.7607	387.436	550.19	protein_coding
ENSG00000271788	AC008875.1	1.65467	2.90102	1.10894	2.61602	0.00889607	0.0316916	0	0.926896	0	0	0.517977	1.56449	0	0	0	5.71199	0.794225	2.71664	1.03839	6.12621	0	9.70142	0.685728	0	lncRNA
ENSG00000100253	MIOX	2.90054	2.8984	1.12171	2.58391	0.00976866	0.0342165	0	1.85379	0.889666	0	2.07191	0	0	0.841994	0	0	3.97112	5.43329	0	1.02103	4.26665	0	24.0005	7.85986	protein_coding
ENSG00000140092	FBLN5	2.63181	2.89478	1.08924	2.65762	0.0078694	0.0287005	0	0	0.889666	1.02371	1.55393	0	0	0.841994	0.922379	17.136	2.38267	0.905548	1.03839	6.12621	0	14.5521	0	0	protein_coding
ENSG00000255587	RAB44	7.9886	2.89312	0.846142	3.41919	0.000628078	0.00344935	1.09071	0.926896	1.77933	0	3.62584	3.91124	1.87678	1.68399	1.84476	1.632	3.1769	30.7886	39.4589	30.631	0	19.4028	0	1.96496	protein_coding
ENSG00000143228	NUF2	23.5291	2.89031	0.415098	6.96295	3.33212e-12	1.19298e-10	2.18142	9.26896	6.22766	2.04742	3.10786	7.82247	13.1374	5.05196	3.68952	46.5119	81.0109	56.1439	15.5759	40.8414	11.3777	47.537	42.5151	29.4745	protein_coding
ENSG00000038945	MSR1	7.35969	2.8897	0.715942	4.03622	5.43191e-05	0.000421899	6.54425	0	2.669	0	1.55393	0.782247	1.87678	0.841994	1.84476	22.032	6.3538	1.8111	46.7277	10.2103	1.42222	5.82085	8.22874	13.7548	protein_coding
ENSG00000114541	FRMD4B	130.898	2.88907	0.556215	5.19416	2.05648e-07	3.01397e-06	89.4381	21.3186	16.9037	6.14226	50.7618	21.9029	20.6446	38.7317	13.8357	8.97598	364.549	471.79	37.3822	115.377	163.555	132.909	274.977	506.961	protein_coding
ENSG00000186994	KANK3	7.35488	2.88757	0.65524	4.40689	1.04865e-05	0.000100565	0	0.926896	0.889666	0	1.03595	2.34674	3.75356	1.68399	5.53427	22.032	13.5018	12.6777	23.883	12.2524	5.68887	3.88057	0.685728	21.6146	protein_coding
ENSG00000164611	PTTG1	92.1347	2.88379	0.328396	8.78147	1.61355e-18	1.55532e-16	7.63496	21.3186	16.014	24.569	26.9348	24.2497	33.782	25.2598	19.37	172.176	205.704	134.927	44.6509	191.955	191.999	144.551	306.52	66.8088	protein_coding
ENSG00000162496	DHRS3	70.3683	2.88345	0.52602	5.48164	4.21405e-08	7.11185e-07	10.9071	4.63448	7.11733	4.09484	7.76966	15.6449	84.455	10.9459	11.0685	49.7759	155.668	81.4993	154.721	76.5776	51.1998	204.7	288.692	47.1591	protein_coding
ENSG00000276778	LINC02227	10.4368	2.88215	1.12681	2.55779	0.0105339	0.0363984	11.9978	0	1.77933	0	1.55393	0.782247	0	1.68399	4.6119	0	42.0939	56.1439	0	5.10517	48.3554	0	0	13.7548	lncRNA
ENSG00000010278	CD9	125.102	2.88087	0.640895	4.49507	6.95475e-06	7.00397e-05	32.7212	6.48827	14.2347	117.727	33.1505	29.7254	3.75356	26.9438	3.68952	31.8239	526.571	220.954	92.417	22.4628	439.465	46.5668	100.116	503.031	protein_coding
ENSG00000168268	NT5DC2	26.6082	2.8802	0.475413	6.05832	1.37548e-09	3.07985e-08	5.45354	5.56137	0.889666	7.16597	3.62584	5.47573	24.3981	5.05196	3.68952	103.632	54.8015	89.6492	16.6143	26.5469	27.0221	17.4626	44.5723	37.3343	protein_coding
ENSG00000150457	LATS2	38.2084	2.87547	0.474639	6.05822	1.37638e-09	3.07985e-08	15.2699	6.48827	3.55866	6.14226	4.14382	8.60472	22.5213	5.05196	12.9133	14.688	100.072	47.0885	96.5706	26.5469	135.111	55.2981	13.7146	113.968	protein_coding
ENSG00000196639	HRH1	2.10759	2.86288	1.15324	2.48248	0.0130473	0.043176	0	0	0	1.02371	2.07191	0	0	0.841994	0	0	7.94225	0.905548	0	6.12621	0	9.70142	3.42864	5.89489	protein_coding
ENSG00000132744	ACY3	25.6854	2.85992	0.70392	4.06285	4.8477e-05	0.000381848	2.18142	6.48827	4.44833	5.11855	8.28763	10.9515	16.891	2.52598	0	5.71199	33.3574	21.7331	10.3839	266.49	12.7999	32.9848	8.22874	13.7548	protein_coding
ENSG00000067191	CACNB1	8.03342	2.85846	0.462962	6.17428	6.64652e-10	1.594e-08	5.45354	2.78069	0.889666	1.02371	3.10786	0.782247	0	0.841994	1.84476	14.688	15.8845	16.2999	9.34554	14.2945	18.4888	6.79099	14.4003	17.6847	protein_coding
ENSG00000185339	TCN2	4.99488	2.85595	0.777978	3.67099	0.000241611	0.00154666	4.36283	1.85379	0	2.04742	1.03595	0	0	0.841994	0.922379	4.89599	4.76535	8.14993	11.4223	11.2314	0	32.9848	3.42864	1.96496	protein_coding
ENSG00000197093	GAL3ST4	33.9126	2.8551	0.604721	4.72135	2.34288e-06	2.63735e-05	14.1792	3.70758	3.55866	12.2845	10.3595	4.69348	11.2607	11.7879	2.76714	206.448	51.6246	74.2549	74.7643	7.14724	45.5109	20.373	0.685728	55.019	protein_coding
ENSG00000257698	AC084033.3	41.0158	2.85402	0.42616	6.69706	2.12654e-11	6.70373e-10	4.36283	12.0496	9.78633	8.18968	12.4315	11.7337	11.2607	10.1039	9.22379	37.5359	52.4188	45.2774	26.9982	96.9983	236.088	97.0142	25.3719	31.4394	lncRNA
ENSG00000170525	PFKFB3	129.977	2.85372	0.591366	4.82564	1.39554e-06	1.68552e-05	43.6283	14.8303	26.69	35.8299	24.8629	22.6852	16.891	42.9417	55.3427	37.5359	293.863	115.91	158.874	26.5469	1109.33	16.4924	57.6012	239.726	protein_coding
ENSG00000160447	PKN3	13.6456	2.85287	0.550042	5.18663	2.14136e-07	3.12922e-06	1.09071	3.70758	1.77933	4.09484	4.14382	1.56449	11.2607	3.36798	0.922379	46.5119	10.3249	13.5832	37.3822	6.12621	7.11108	25.2237	57.6012	9.82482	protein_coding
ENSG00000070081	NUCB2	165.275	2.85108	0.291223	9.79002	1.2427e-22	2.37725e-20	49.0819	24.0993	43.5936	35.8299	52.3157	22.6852	39.4123	49.6777	45.1966	190.128	363.755	292.492	552.425	341.026	163.555	389.027	110.402	210.251	protein_coding
ENSG00000006756	ARSD	127.046	2.84859	0.399518	7.13008	1.00311e-12	3.959e-11	20.7235	34.2951	35.5866	18.4268	39.8842	30.5076	31.9052	31.1538	35.9728	127.296	262.888	499.862	211.832	324.689	12.7999	256.118	112.459	200.426	protein_coding
ENSG00000263331	AC008551.1	3.03052	2.84695	1.15147	2.47245	0.0134192	0.0441541	3.27212	0	0	0	1.55393	1.56449	0	0	0	20.4	0	3.62219	12.4607	0	5.68887	0	2.05718	3.92993	lncRNA
ENSG00000154920	EME1	6.67152	2.84561	0.582198	4.8877	1.02021e-06	1.27416e-05	4.36283	1.85379	0.889666	2.04742	2.07191	0	3.75356	0.841994	0	10.608	7.94225	25.3553	2.07679	12.2524	9.95551	9.70142	18.5147	7.85986	protein_coding
ENSG00000271447	MMP28	3.08352	2.84242	0.835223	3.40319	0.000666046	0.00362771	2.18142	0	0.889666	0	0.517977	0	3.75356	0.841994	0	11.424	2.38267	3.62219	4.15357	3.0631	2.84443	16.4924	1.37146	1.96496	protein_coding
ENSG00000138821	SLC39A8	26.9539	2.84237	0.537157	5.2915	1.21314e-07	1.88256e-06	4.36283	1.85379	3.55866	3.07113	2.58989	8.60472	24.3981	1.68399	11.9909	24.48	49.2419	22.6387	37.3822	31.6521	173.51	31.0445	15.7717	37.3343	protein_coding
ENSG00000088992	TESC	43.7487	2.84092	0.701539	4.04955	5.13152e-05	0.000401404	10.9071	2.78069	4.44833	6.14226	13.4674	0.782247	39.4123	15.9979	4.6119	28.5599	19.0614	20.8276	70.6107	134.777	5.68887	59.1787	346.293	3.92993	protein_coding
ENSG00000261220	AC103706.1	13.8943	2.83999	0.633902	4.48017	7.45826e-06	7.4667e-05	1.09071	0	1.77933	5.11855	5.17977	3.12899	9.38389	0.841994	4.6119	3.26399	27.7979	20.8276	14.5375	5.10517	39.8221	11.6417	7.54301	88.4234	lncRNA
ENSG00000170677	SOCS6	13.793	2.83687	0.531694	5.33554	9.5263e-08	1.51584e-06	4.36283	0.926896	5.338	2.04742	7.25168	1.56449	3.75356	2.52598	1.84476	9.79198	30.9748	20.8276	12.4607	12.2524	79.6441	9.70142	9.60019	33.4044	protein_coding
ENSG00000072071	ADGRL1	30.6607	2.83329	0.477495	5.93366	2.96259e-09	6.20452e-08	7.63496	1.85379	13.345	12.2845	9.84157	7.04023	1.87678	8.41994	4.6119	113.424	15.8845	56.1439	148.49	28.589	41.2443	37.8355	17.8289	25.5445	protein_coding
ENSG00000225032	AL162586.1	13.4986	2.8308	0.513224	5.51572	3.47349e-08	5.92859e-07	3.27212	3.70758	5.338	4.09484	1.55393	5.47573	0	5.89396	0	31.8239	19.0614	40.7496	35.3054	42.8835	7.11108	17.4626	5.48582	13.7548	lncRNA
ENSG00000133561	GIMAP6	16.9692	2.8264	0.756373	3.73678	0.000186388	0.00123276	4.36283	5.56137	2.669	1.02371	12.4315	2.34674	5.63033	2.52598	0.922379	46.5119	7.14802	0.905548	19.7295	110.272	0	67.9099	9.60019	5.89489	protein_coding
ENSG00000170522	ELOVL6	4.19156	2.82324	0.854403	3.30434	0.000952017	0.00494319	2.18142	0	1.77933	0	0	3.91124	1.87678	0	0	12.24	1.58845	6.33883	1.03839	1.02103	7.11108	19.4028	13.0288	3.92993	protein_coding
ENSG00000102780	DGKH	22.1538	2.82275	0.521632	5.41139	6.25368e-08	1.01992e-06	8.72566	2.78069	3.55866	2.04742	5.17977	1.56449	5.63033	11.7879	8.30141	30.1919	58.7726	9.96102	17.6527	6.12621	21.3332	35.8953	108.345	60.9139	protein_coding
ENSG00000164086	DUSP7	6.15501	2.82221	0.712869	3.95894	7.52825e-05	0.000562915	3.27212	0.926896	1.77933	0	4.14382	1.56449	1.87678	0	0	31.8239	2.38267	7.24438	13.4991	11.2314	7.11108	6.79099	17.1432	0	protein_coding
ENSG00000185920	PTCH1	2.9201	2.82178	1.02756	2.74611	0.00603073	0.0231278	0	0	0.889666	0	0	0.782247	1.87678	2.52598	0.922379	31.8239	2.38267	2.71664	161.989	2.04207	0	2.91043	0.685728	1.96496	protein_coding
ENSG00000097046	CDC7	6.03675	2.82121	0.703847	4.00827	6.1166e-05	0.00046783	1.09071	1.85379	0	3.07113	0	3.91124	3.75356	0.841994	0	13.056	34.9459	7.24438	8.30715	2.04207	4.26665	13.582	4.8001	5.89489	protein_coding
ENSG00000003147	ICA1	7.71264	2.81951	0.915429	3.07999	0.00207009	0.00949188	1.09071	0.926896	5.338	2.04742	3.10786	0	1.87678	0	2.76714	1.632	1.58845	4.52774	0	34.7152	5.68887	66.9398	0.685728	5.89489	protein_coding
ENSG00000141505	ASGR1	1.99616	2.81948	0.968611	2.91085	0.00360445	0.015259	0	0	0.889666	0	1.03595	0	0	0.841994	0.922379	0	0.794225	1.8111	7.26875	4.08414	7.11108	1.94028	1.37146	7.85986	protein_coding
ENSG00000134222	PSRC1	2.21303	2.81889	1.08725	2.59269	0.00952295	0.033512	0	0	0	1.02371	1.55393	0	1.87678	0.841994	0	13.872	0	1.8111	0	6.12621	1.42222	5.82085	5.48582	0	protein_coding
ENSG00000025039	RRAGD	50.4125	2.8188	0.643754	4.37869	1.19395e-05	0.000112818	11.9978	7.41516	7.11733	7.16597	15.0213	11.7337	33.782	5.89396	13.8357	34.2719	118.339	367.652	75.8027	5.10517	36.9776	24.2536	1.37146	129.688	protein_coding
ENSG00000142185	TRPM2	44.9235	2.81307	0.370235	7.59807	3.00573e-14	1.5321e-12	9.81637	16.6841	5.338	9.21339	12.9494	7.04023	11.2607	9.26193	19.37	44.8799	28.5921	181.11	69.5723	71.4724	39.8221	68.8801	138.517	64.8438	protein_coding
ENSG00000101665	SMAD7	7.62036	2.81112	0.961592	2.92341	0.00346223	0.0147609	2.18142	3.70758	0	0	0.517977	0	9.38389	1.68399	0.922379	23.664	2.38267	2.71664	7.26875	0	58.3109	10.6716	0	13.7548	protein_coding
ENSG00000226137	BAIAP2-DT	13.0406	2.81062	0.734144	3.82843	0.000128963	0.000891593	3.27212	0	1.77933	1.02371	4.14382	2.34674	7.50711	2.52598	7.37903	26.9279	1.58845	34.4108	53.9964	44.9255	1.42222	36.8654	0.685728	3.92993	lncRNA
ENSG00000185222	WBP5	11.5993	2.80972	0.942842	2.98005	0.002882	0.0126052	4.36283	1.85379	7.11733	1.02371	1.55393	1.56449	3.75356	4.20997	0.922379	22.032	60.3611	81.4993	11.4223	0	7.11108	0	0	0	protein_coding
ENSG00000138587	MNS1	14.8108	2.80947	0.582644	4.82192	1.4218e-06	1.71037e-05	2.18142	0.926896	2.669	1.02371	2.07191	3.91124	13.1374	9.26193	0	3.26399	38.1228	17.2054	18.6911	40.8414	55.4664	30.0744	19.8861	7.85986	protein_coding
ENSG00000117586	TNFSF4	5.24611	2.80842	0.8687	3.2329	0.0012254	0.00612348	0	0	1.77933	0	0	1.56449	3.75356	0.841994	4.6119	41.6159	1.58845	0.905548	5.19197	2.04207	5.68887	15.5223	3.42864	5.89489	protein_coding
ENSG00000058668	ATP2B4	101.786	2.80821	0.251794	11.1528	6.9378e-29	2.54448e-26	13.0885	29.6607	34.697	23.5453	25.3809	21.1207	26.2749	33.6798	21.2147	163.2	106.426	281.625	244.022	245.048	98.1329	147.462	158.403	159.162	protein_coding
ENSG00000134326	CMPK2	16.5157	2.80219	0.706971	3.96366	7.38095e-05	0.000553277	0	4.63448	0	5.11855	5.69775	1.56449	3.75356	5.05196	11.0685	30.1919	11.9134	9.96102	20.7679	360.425	155.022	13.582	6.85728	3.92993	protein_coding
ENSG00000280832	GSEC	4.15826	2.80055	0.877674	3.19087	0.00141844	0.00691156	0	0	1.77933	0	1.03595	0	7.50711	0	0.922379	12.24	5.55957	10.8666	5.19197	21.4417	0	2.91043	3.42864	1.96496	lncRNA
ENSG00000132334	PTPRE	403.316	2.79959	0.387976	7.21587	5.35909e-13	2.21386e-11	239.956	50.0524	79.1803	28.6639	63.1932	57.8863	178.294	84.1994	132.823	394.127	676.679	784.204	1381.06	452.318	420.976	440.445	386.751	1408.88	protein_coding
ENSG00000170779	CDCA4	30.0948	2.79896	0.427649	6.545	5.94972e-11	1.73384e-09	4.36283	7.41516	7.11733	14.3319	8.80561	4.69348	5.63033	10.1039	5.53427	167.28	57.1842	57.955	16.6143	30.631	48.3554	28.1341	45.9438	21.6146	protein_coding
ENSG00000117632	STMN1	671.092	2.79472	0.299219	9.34004	9.62999e-21	1.35333e-18	104.708	147.376	118.326	126.94	204.083	171.312	300.284	172.609	178.942	2101.2	1713.94	1286.78	949.091	1226.26	254.577	997.306	1155.45	870.479	protein_coding
ENSG00000185477	GPRIN3	17.327	2.79378	0.598485	4.66809	3.04007e-06	3.34652e-05	3.27212	0.926896	4.44833	3.07113	5.17977	1.56449	7.50711	6.73595	6.45665	21.216	11.1191	11.7721	13.4991	24.5048	1.42222	37.8355	15.7717	135.583	protein_coding
ENSG00000092470	WDR76	31.6192	2.77377	0.383396	7.23472	4.66495e-13	1.95941e-11	5.45354	2.78069	3.55866	4.09484	8.28763	9.38697	11.2607	14.3139	13.8357	75.8878	84.982	99.6102	22.8447	27.5679	31.2888	39.7758	49.3724	64.8438	protein_coding
ENSG00000134470	IL15RA	2.31164	2.7737	0.87366	3.17481	0.00149936	0.00724017	0	0	0	2.04742	1.03595	0	1.87678	0.841994	0	3.26399	8.73647	3.62219	4.15357	8.16828	4.26665	2.91043	0.685728	0	protein_coding
ENSG00000278200	LINC01971	2.26885	2.77293	0.963023	2.8794	0.00398435	0.0165505	0	0.926896	0	3.07113	1.03595	0	0	0	0	8.97598	3.97112	9.96102	1.03839	1.02103	0	4.85071	2.05718	3.92993	lncRNA
ENSG00000131697	NPHP4	13.5363	2.77162	0.588732	4.70778	2.50428e-06	2.80603e-05	3.27212	0.926896	2.669	8.18968	2.58989	4.69348	3.75356	1.68399	3.68952	93.0238	7.14802	8.14993	14.5375	5.10517	45.5109	12.6118	12.3431	13.7548	protein_coding
ENSG00000110693	SOX6	5.57786	2.77022	0.766176	3.61564	0.000299611	0.00185716	2.18142	0.926896	0	2.04742	0.517977	0	3.75356	0.841994	3.68952	26.9279	11.1191	11.7721	6.23036	2.04207	1.42222	22.3133	0.685728	3.92993	protein_coding
ENSG00000108679	LGALS3BP	80.7254	2.76958	0.453235	6.11069	9.91989e-10	2.29839e-08	26.177	6.48827	8.89666	12.2845	36.7764	17.2094	28.1517	15.9979	34.128	44.8799	93.7185	159.376	73.7259	355.32	19.911	140.671	265.377	113.968	protein_coding
ENSG00000138119	MYOF	2.76478	2.76916	1.01364	2.73191	0.00629686	0.0239106	2.18142	1.85379	1.77933	0	0.517977	0	0	0	0	3.26399	1.58845	1.8111	4.15357	23.4838	0	7.76114	1.37146	0	protein_coding
ENSG00000164109	MAD2L1	12.1713	2.7586	0.52041	5.30082	1.15282e-07	1.8095e-06	1.09071	2.78069	4.44833	6.14226	3.62584	4.69348	3.75356	1.68399	0	37.5359	28.5921	29.8831	1.03839	11.2314	15.6444	15.5223	21.9433	29.4745	protein_coding
ENSG00000177283	FZD8	4.37115	2.75762	1.07978	2.55387	0.0106534	0.0367421	1.09071	0.926896	0	2.04742	0.517977	0	0	0	5.53427	17.952	2.38267	3.62219	0	0	22.7555	0	19.8861	1.96496	protein_coding
ENSG00000064763	FAR2	6.35941	2.75601	0.733977	3.7549	0.000173412	0.00115996	0	0	0	1.02371	3.62584	3.12899	3.75356	3.36798	0	3.26399	6.3538	8.14993	4.15357	9.18931	4.26665	18.4327	41.8294	3.92993	protein_coding
ENSG00000173530	TNFRSF10D	21.4862	2.75517	0.458652	6.00711	1.88863e-09	4.12781e-08	6.54425	3.70758	7.11733	2.04742	7.25168	3.91124	7.50711	3.36798	8.30141	16.32	26.2094	33.5053	37.3822	6.12621	98.1329	15.5223	50.7439	53.054	protein_coding
ENSG00000150938	CRIM1	77.9391	2.75336	0.642824	4.28323	1.84199e-05	0.000162643	19.6327	14.8303	16.9037	31.735	11.3955	20.3384	18.7678	34.5218	12.9133	45.6959	264.477	40.7496	48.8045	5.10517	628.62	55.2981	3.42864	129.688	protein_coding
ENSG00000169641	LUZP1	196.118	2.74802	0.517243	5.31282	1.07943e-07	1.70318e-06	42.5376	48.1986	38.2556	21.4979	33.6685	42.2414	148.265	44.6257	40.5847	42.4319	366.138	175.676	492.198	77.5986	1405.15	143.581	161.146	206.321	protein_coding
ENSG00000171488	LRRC8C	73.8349	2.74461	0.380593	7.21141	5.53745e-13	2.26885e-11	11.9978	16.6841	26.69	40.9484	24.3449	20.3384	11.2607	9.26193	10.1462	370.463	105.632	65.1994	137.068	70.4514	139.377	112.536	60.3441	96.2833	protein_coding
ENSG00000196678	ERI2	4.41739	2.74209	0.72379	3.78852	0.000151548	0.00102789	0	0.926896	1.77933	2.04742	1.03595	0	0	2.52598	1.84476	17.952	1.58845	12.6777	2.07679	11.2314	1.42222	13.582	6.85728	1.96496	protein_coding
ENSG00000258082	AL391832.3	1.27236	2.74103	1.09507	2.50306	0.0123124	0.0412067	0	0	0	0	0	0	0	1.68399	0.922379	0	0.794225	7.24438	3.11518	2.04207	1.42222	0.970142	2.74291	1.96496	lncRNA
ENSG00000071073	MGAT4A	74.2072	2.73901	0.438605	6.24481	4.24317e-10	1.05462e-08	31.6305	16.6841	25.8003	9.21339	20.7191	10.9515	13.1374	34.5218	11.0685	68.5439	119.928	481.751	86.1866	64.3252	35.5554	70.8204	140.574	94.3183	protein_coding
ENSG00000064225	ST3GAL6	33.9309	2.73855	0.388552	7.04807	1.81412e-12	6.80274e-11	9.81637	9.26896	1.77933	7.16597	13.9854	9.38697	11.2607	9.26193	7.37903	113.424	23.0325	51.6162	98.6474	34.7152	63.9997	64.0294	17.1432	64.8438	protein_coding
ENSG00000270681	AC095055.1	6.97831	2.73592	0.953089	2.87058	0.00409716	0.0169348	4.36283	0.926896	0	1.02371	1.55393	0	5.63033	1.68399	1.84476	0	19.0614	6.33883	2.07679	0	44.0887	0	7.54301	29.4745	lncRNA
ENSG00000253522	MIR3142HG	10.4073	2.73089	0.609147	4.48314	7.35519e-06	7.37614e-05	1.09071	2.78069	0.889666	0	4.14382	4.69348	5.63033	0	5.53427	13.872	27.0036	2.71664	13.4991	16.3366	44.0887	32.9848	6.17155	5.89489	lncRNA
ENSG00000187240	DYNC2H1	15.455	2.72837	0.693678	3.9332	8.38239e-05	0.000616974	6.54425	6.48827	4.44833	3.07113	2.58989	4.69348	0	4.20997	3.68952	0.815998	2.38267	15.3943	87.225	20.4207	1.42222	25.2237	10.9716	78.5986	protein_coding
ENSG00000137135	ARHGEF39	4.23835	2.72715	0.655983	4.15734	3.21969e-05	0.000266893	0	3.70758	0	0	1.03595	0.782247	3.75356	0	1.84476	13.056	10.3249	6.33883	6.23036	3.0631	7.11108	6.79099	10.2859	1.96496	protein_coding
ENSG00000198846	TOX	27.0451	2.72076	0.502508	5.41437	6.15063e-08	1.0042e-06	10.9071	3.70758	8.007	3.07113	5.17977	11.7337	7.50711	5.89396	8.30141	48.9599	6.3538	36.2219	65.4188	65.3462	1.42222	103.805	43.8866	51.0891	protein_coding
ENSG00000217555	CKLF	59.7204	2.71904	0.396063	6.86517	6.64136e-12	2.24924e-10	17.4513	2.78069	16.9037	28.6639	20.2011	11.7337	1.87678	18.5239	22.1371	151.776	49.2419	133.115	63.342	159.281	32.711	150.372	124.117	70.7387	protein_coding
ENSG00000206177	HBM	201.159	2.71549	0.835013	3.25203	0.00114584	0.00579548	73.0774	19.4648	199.285	55.2803	68.373	21.9029	0	9.26193	31.3609	1138.32	202.527	325.092	197.295	62.2831	191.999	998.276	19.2004	7.85986	protein_coding
ENSG00000111331	OAS3	82.2516	2.71044	0.58946	4.59818	4.26192e-06	4.50045e-05	11.9978	15.7572	24.021	14.3319	41.9561	25.0319	15.0142	16.8399	30.4385	125.664	8.73647	27.1664	106.955	754.545	122.311	50.4474	63.7727	25.5445	protein_coding
ENSG00000049449	RCN1	16.0599	2.70938	0.365066	7.42163	1.1569e-13	5.3527e-12	2.18142	4.63448	6.22766	3.07113	2.58989	4.69348	3.75356	6.73595	4.6119	31.0079	31.769	26.2609	21.8063	13.2735	41.2443	44.6265	28.8006	11.7898	protein_coding
ENSG00000185022	MAFF	114.605	2.70285	0.763348	3.54079	0.000398931	0.00236627	32.7212	13.9034	41.8143	18.4268	4.14382	7.04023	41.2891	64.8335	50.7308	5.71199	274.008	21.7331	242.984	11.2314	1115.02	10.6716	26.0577	80.5635	protein_coding
ENSG00000106605	BLVRA	9.8212	2.70261	0.537029	5.03252	4.84065e-07	6.5223e-06	2.18142	0.926896	3.55866	0	5.17977	2.34674	0	3.36798	4.6119	17.952	20.6498	28.9775	10.3839	28.589	9.95551	24.2536	2.05718	11.7898	protein_coding
ENSG00000132613	MTSS1L	27.3803	2.70108	0.417899	6.46348	1.02324e-10	2.88677e-09	16.3606	4.63448	6.22766	3.07113	7.25168	9.38697	11.2607	4.20997	4.6119	8.97598	95.307	45.2774	31.1518	45.9466	1154.84	54.328	78.8587	43.2292	protein_coding
ENSG00000187325	TAF9B	9.39031	2.69151	0.479511	5.61302	1.98821e-08	3.59336e-07	1.09071	0.926896	3.55866	2.04742	3.10786	2.34674	1.87678	1.68399	5.53427	26.1119	23.8267	25.3553	6.23036	5.10517	12.7999	15.5223	10.2859	21.6146	protein_coding
ENSG00000116062	MSH6	197.85	2.68884	0.45313	5.93392	2.95793e-09	6.20339e-08	101.436	43.5641	83.6286	32.7587	31.0786	41.4591	33.782	39.5737	71.0232	876.382	335.957	614.867	443.394	92.9142	440.887	97.0142	61.7155	119.863	protein_coding
ENSG00000134243	SORT1	7.80593	2.68877	1.09945	2.44555	0.0144632	0.047003	1.09071	0	0.889666	2.04742	7.76966	3.12899	1.87678	1.68399	0	9.79198	4.76535	0.905548	0	35.7362	0	70.8204	0	0	protein_coding
ENSG00000188112	C6orf132	1.99918	2.68671	1.0535	2.55026	0.0107642	0.0370052	0	0	0	1.02371	0	0	0	1.68399	1.84476	7.34399	2.38267	4.52774	2.07679	0	0	1.94028	1.37146	11.7898	protein_coding
ENSG00000165511	C10orf25	7.63285	2.68485	0.717623	3.7413	0.000183069	0.00121483	0	0.926896	3.55866	1.02371	3.62584	1.56449	1.87678	0.841994	4.6119	11.424	1.58845	32.5997	6.23036	18.3786	4.26665	25.2237	0	19.6496	lncRNA
ENSG00000157601	MX1	524.358	2.67511	0.633172	4.22494	2.39008e-05	0.000204552	80.7124	159.426	120.995	101.347	260.025	174.441	108.853	125.457	145.736	152.592	299.423	334.147	559.694	4754.96	1685.33	26.1938	87.7732	261.34	protein_coding
ENSG00000162073	PAQR4	8.42421	2.66801	0.657312	4.05897	4.92901e-05	0.000387441	0	2.78069	2.669	0	3.10786	5.47573	1.87678	1.68399	2.76714	37.5359	11.1191	19.922	8.30715	10.2103	0	10.6716	31.5435	1.96496	protein_coding
ENSG00000115355	CCDC88A	280.553	2.66739	0.379367	7.03116	2.04821e-12	7.58594e-11	121.069	50.0524	62.2766	123.869	55.4236	96.9987	52.5498	90.9354	33.2056	46.5119	509.892	261.703	753.873	463.55	861.863	566.563	416.237	483.381	protein_coding
ENSG00000119411	BSPRY	16.2965	2.66541	0.61588	4.32781	1.506e-05	0.000136749	8.72566	6.48827	1.77933	4.09484	5.17977	5.47573	1.87678	3.36798	2.76714	0	50.0362	12.6777	18.6911	47.9886	11.3777	86.3426	20.5718	5.89489	protein_coding
ENSG00000111247	RAD51AP1	25.8079	2.66345	0.444009	5.99865	1.98963e-09	4.31719e-08	4.36283	6.48827	7.11733	10.2371	8.28763	11.7337	1.87678	9.26193	2.76714	19.584	135.812	49.8051	13.4991	18.3786	49.7776	34.9251	45.2581	35.3694	protein_coding
ENSG00000167705	RILP	19.2074	2.66121	0.510333	5.21466	1.84156e-07	2.73092e-06	3.27212	0	2.669	1.02371	7.76966	1.56449	20.6446	8.41994	4.6119	27.7439	12.7076	47.994	33.2286	53.0938	17.0666	45.5967	44.5723	13.7548	protein_coding
ENSG00000185499	MUC1	5.25001	2.65949	0.774157	3.43533	0.000591828	0.00328146	0	0.926896	1.77933	0	0.517977	0	9.38389	2.52598	0	0.815998	3.1769	11.7721	11.4223	15.3155	4.26665	4.85071	19.8861	7.85986	protein_coding
ENSG00000087586	AURKA	16.4492	2.65158	0.570148	4.65069	3.30827e-06	3.60789e-05	2.18142	4.63448	3.55866	5.11855	6.7337	8.60472	7.50711	0	2.76714	93.8398	7.94225	25.3553	6.23036	33.6941	17.0666	38.8057	28.1148	3.92993	protein_coding
ENSG00000164087	POC1A	27.3667	2.64435	0.433236	6.10371	1.03634e-09	2.38278e-08	6.54425	17.611	2.669	7.16597	4.66179	7.04023	7.50711	12.6299	2.76714	41.6159	25.4152	94.1769	21.8063	57.1779	21.3332	49.4772	95.3162	17.6847	protein_coding
ENSG00000144395	CCDC150	8.53152	2.64199	0.55383	4.7704	1.83858e-06	2.15317e-05	4.36283	0	2.669	0	1.55393	4.69348	0	0.841994	6.45665	10.608	28.5921	19.0165	5.19197	6.12621	22.7555	10.6716	12.3431	17.6847	protein_coding
ENSG00000128791	TWSG1	9.82922	2.63603	0.555618	4.74432	2.09207e-06	2.40692e-05	1.09071	0.926896	3.55866	3.07113	3.10786	3.91124	1.87678	5.05196	0.922379	10.608	26.2094	9.05548	15.5759	14.2945	34.1332	6.79099	1.37146	35.3694	protein_coding
ENSG00000173281	PPP1R3B	11.785	2.63294	0.520511	5.05839	4.22818e-07	5.76943e-06	3.27212	3.70758	2.669	0	2.07191	0.782247	5.63033	3.36798	8.30141	22.848	26.2094	16.2999	10.3839	12.2524	24.1777	4.85071	10.2859	55.019	protein_coding
ENSG00000277462	ZNF670	5.1873	2.63284	0.824814	3.19205	0.00141268	0.00688795	0	0.926896	0.889666	0	0.517977	2.34674	5.63033	1.68399	1.84476	14.688	15.0903	4.52774	3.11518	1.02103	31.2888	1.94028	0	7.85986	protein_coding
ENSG00000137563	GGH	9.26193	2.63171	0.622568	4.22718	2.36637e-05	0.000202869	4.36283	5.56137	2.669	1.02371	1.55393	0.782247	0	4.20997	2.76714	17.136	10.3249	29.8831	4.15357	17.3576	0	45.5967	7.54301	11.7898	protein_coding
ENSG00000116885	OSCP1	1.82516	2.62756	1.04384	2.5172	0.011829	0.0399087	0	0	0.889666	1.02371	0.517977	1.56449	0	0	0	1.632	2.38267	0	1.03839	2.04207	7.11108	6.79099	0	7.85986	protein_coding
ENSG00000133574	GIMAP4	52.1907	2.62377	0.555728	4.72132	2.34322e-06	2.63735e-05	7.63496	5.56137	18.683	1.02371	39.8842	10.1692	3.75356	17.6819	24.9042	223.584	27.0036	70.6327	32.1902	174.597	17.0666	148.432	30.172	86.4584	protein_coding
ENSG00000122707	RECK	17.3119	2.62366	0.501343	5.23326	1.66543e-07	2.49434e-06	1.09071	5.56137	6.22766	7.16597	6.21573	7.04023	0	4.20997	4.6119	33.4559	17.4729	22.6387	44.6509	18.3786	1.42222	14.5521	65.8299	51.0891	protein_coding
ENSG00000142694	EVA1B	5.63313	2.62287	0.729246	3.59669	0.000322298	0.00197893	5.45354	0	0	0	3.62584	3.12899	1.87678	0	0	8.97598	2.38267	9.05548	12.4607	22.4628	5.68887	17.4626	6.85728	1.96496	protein_coding
ENSG00000182578	CSF1R	69.2295	2.6198	0.897065	2.92041	0.00349566	0.0148781	25.0863	9.26896	15.1243	2.04742	51.2797	6.25798	18.7678	16.8399	29.5161	6.52799	12.7076	31.6942	44.6509	456.402	0	113.507	402.522	3.92993	protein_coding
ENSG00000181585	TMIE	2.31983	2.61971	0.998688	2.62315	0.00871198	0.0311243	0	0.926896	2.669	0	0	0	1.87678	0.841994	0	0.815998	0	7.24438	5.19197	3.0631	5.68887	0	7.54301	5.89489	protein_coding
ENSG00000267288	AC138150.2	2.02428	2.61698	0.994031	2.63269	0.00847115	0.0304812	0	1.85379	0.889666	1.02371	1.03595	0	0	0	0	0.815998	0.794225	2.71664	1.03839	3.0631	0	2.91043	14.4003	5.89489	lncRNA
ENSG00000213347	MXD3	28.5135	2.61639	0.392746	6.66178	2.70527e-11	8.31884e-10	6.54425	5.56137	6.22766	8.18968	14.5034	10.9515	11.2607	3.36798	5.53427	110.976	80.2167	44.3718	17.6527	38.7993	17.0666	44.6265	50.0581	37.3343	protein_coding
ENSG00000143653	SCCPDH	36.5046	2.61506	0.330984	7.90087	2.76972e-15	1.66593e-13	13.0885	9.26896	7.11733	9.21339	14.5034	3.12899	7.50711	15.9979	11.9909	75.0718	61.9495	75.1604	48.8045	66.3673	22.7555	117.387	62.4013	35.3694	protein_coding
ENSG00000238121	LINC00426	62.4057	2.61438	0.289482	9.03125	1.69716e-19	1.99377e-17	17.4513	10.1959	19.5727	13.3082	15.0213	17.9917	30.0284	18.5239	18.4476	216.24	108.015	90.5548	49.8429	119.461	49.7776	108.656	120.002	100.213	lncRNA
ENSG00000198826	ARHGAP11A	17.1178	2.61227	0.588756	4.43693	9.12502e-06	8.93314e-05	6.54425	0.926896	1.77933	2.04742	22.273	0.782247	0	5.89396	0.922379	39.9839	30.9748	50.7107	17.6527	28.589	18.4888	39.7758	32.9149	7.85986	protein_coding
ENSG00000204472	AIF1	128.437	2.61152	0.40496	6.44882	1.12723e-10	3.15645e-09	41.4469	12.0496	30.2486	29.6876	67.337	14.0805	16.891	51.3616	59.9546	465.935	152.491	172.96	99.6857	314.479	115.2	243.506	61.0298	363.518	protein_coding
ENSG00000125384	PTGER2	9.54101	2.61101	0.867051	3.01136	0.00260078	0.011526	2.18142	0	0.889666	0	5.17977	1.56449	0	12.6299	0.922379	17.952	0	9.96102	14.5375	39.8204	1.42222	43.6564	1.37146	19.6496	protein_coding
ENSG00000174307	PHLDA3	3.22931	2.60602	0.832696	3.12962	0.0017503	0.00825345	0	0	0.889666	0	0	1.56449	5.63033	0	1.84476	13.872	3.1769	1.8111	9.34554	5.10517	4.26665	5.82085	4.8001	0	protein_coding
ENSG00000091513	TF	1.2041	2.60499	1.05658	2.46549	0.0136826	0.0448834	0	0.926896	0	1.02371	0	0	1.87678	0	0	1.632	0.794225	3.62219	4.15357	1.02103	0	3.88057	2.74291	0	protein_coding
ENSG00000196141	SPATS2L	40.9975	2.59995	1.06786	2.43473	0.0149028	0.0481818	6.54425	15.7572	29.359	7.16597	8.28763	8.60472	7.50711	20.2079	0.922379	0	7.14802	2.71664	9.34554	400.246	82.4886	130.969	0.685728	0	protein_coding
ENSG00000183691	NOG	7.50874	2.59937	0.669083	3.88497	0.000102344	0.0007304	0	0.926896	1.77933	2.04742	7.25168	0	1.87678	3.36798	0.922379	13.872	15.8845	4.52774	8.30715	33.6941	0	10.6716	12.3431	17.6847	protein_coding
ENSG00000198417	MT1F	6.41104	2.5956	0.792402	3.27561	0.00105436	0.00540183	0	0.926896	2.669	0	5.17977	2.34674	0	2.52598	1.84476	8.15998	2.38267	4.52774	35.3054	4.08414	8.5333	1.94028	34.9721	0	protein_coding
ENSG00000169385	RNASE2	26.7828	2.5945	0.753047	3.44534	0.00057034	0.00318463	4.36283	3.70758	3.55866	3.07113	21.2371	8.60472	9.38389	5.89396	8.30141	35.0879	11.9134	34.4108	9.34554	216.459	7.11108	98.9545	0.685728	0	protein_coding
ENSG00000101412	E2F1	70.79	2.58594	0.427971	6.04233	1.51909e-09	3.36978e-08	28.3584	12.0496	8.007	12.2845	19.1652	17.9917	69.4408	7.57795	11.9909	305.183	154.874	105.949	62.3036	94.9562	140.799	60.1488	117.945	45.1942	protein_coding
ENSG00000130881	LRP3	6.12184	2.58567	0.773416	3.34319	0.000828222	0.0043775	2.18142	0.926896	0	0	4.66179	0.782247	3.75356	0.841994	2.76714	0	8.73647	16.2999	15.5759	4.08414	2.84443	1.94028	34.9721	9.82482	protein_coding
ENSG00000033327	GAB2	251.55	2.58407	0.321318	8.0421	8.83132e-16	5.955e-14	105.799	47.2717	59.6076	46.067	96.8617	54.7573	80.7014	64.8335	91.3155	249.695	980.073	280.72	233.638	243.006	871.819	318.207	308.578	394.958	protein_coding
ENSG00000169877	AHSP	103.812	2.58305	0.755833	3.41748	0.000632027	0.00346727	42.5376	19.4648	121.884	26.6165	36.7764	8.60472	1.87678	1.68399	7.37903	396.575	65.9207	398.441	89.3018	81.6828	38.3998	519.996	7.54301	3.92993	protein_coding
ENSG00000080823	MOK	13.2683	2.57908	0.624121	4.13234	3.59091e-05	0.000293141	3.27212	2.78069	4.44833	0	3.10786	2.34674	9.38389	1.68399	8.30141	4.07999	19.8556	4.52774	17.6527	85.7669	25.5999	33.955	6.17155	5.89489	protein_coding
ENSG00000147889	CDKN2A	21.5482	2.57812	0.554323	4.65093	3.3044e-06	3.60789e-05	6.54425	5.56137	4.44833	4.09484	10.3595	7.04023	1.87678	10.9459	3.68952	100.368	0.794225	59.7661	41.5357	13.2735	11.3777	14.5521	42.5151	49.1241	protein_coding
ENSG00000107863	ARHGAP21	55.2813	2.57765	0.489286	5.2682	1.37771e-07	2.10321e-06	39.2655	11.1227	10.676	4.09484	25.3809	14.8627	9.38389	25.2598	1.84476	75.8878	130.253	143.982	5.19197	80.6617	110.933	107.686	61.0298	137.548	protein_coding
ENSG00000116678	LEPR	5.27141	2.56688	0.70736	3.62881	0.000284727	0.00177875	1.09071	0.926896	0.889666	0	3.62584	0.782247	1.87678	3.36798	0.922379	14.688	0.794225	16.2999	16.6143	8.16828	1.42222	9.70142	13.7146	0	protein_coding
ENSG00000247287	AL359220.1	9.97977	2.56487	0.607664	4.22087	2.43366e-05	0.000207454	3.27212	0	4.44833	3.07113	3.62584	1.56449	1.87678	5.05196	2.76714	2.448	19.8556	11.7721	42.5741	13.2735	1.42222	42.6863	6.17155	13.7548	lncRNA
ENSG00000151458	ANKRD50	23.3991	2.56485	0.515193	4.97843	6.4102e-07	8.411e-06	9.81637	12.9765	1.77933	4.09484	9.84157	8.60472	7.50711	2.52598	3.68952	95.4718	20.6498	28.9775	24.9214	59.22	1.42222	58.2085	16.4575	55.019	protein_coding
ENSG00000131773	KHDRBS3	24.0775	2.56279	0.795412	3.22196	0.00127316	0.00631621	10.9071	0	2.669	1.02371	3.62584	0	35.6588	7.57795	3.68952	140.352	38.1228	43.4663	61.2652	20.4207	9.95551	4.85071	0.685728	49.1241	protein_coding
ENSG00000269910	AL049840.2	1.11558	2.56188	1.05364	2.43145	0.0150384	0.0485752	0	0	0	0	0.517977	0.782247	1.87678	0	0	3.26399	0.794225	3.62219	4.15357	2.04207	0	0.970142	2.05718	0	lncRNA
ENSG00000170412	GPRC5C	8.59572	2.56014	0.687439	3.72417	0.000195961	0.00128732	1.09071	0	2.669	3.07113	3.10786	4.69348	0	4.20997	2.76714	2.448	59.5669	7.24438	16.6143	11.2314	368.354	6.79099	1.37146	23.5796	protein_coding
ENSG00000185745	IFIT1	7.16503	2.55015	0.90011	2.83316	0.00460906	0.0186008	0	0	1.77933	4.09484	4.14382	1.56449	5.63033	0.841994	0.922379	3.26399	0.794225	3.62219	7.26875	509.496	86.7552	2.91043	1.37146	1.96496	protein_coding
ENSG00000101003	GINS1	7.48213	2.54926	0.662582	3.84747	0.000119346	0.000835478	0	0	1.77933	3.07113	3.10786	3.12899	3.75356	5.05196	0	23.664	7.14802	16.2999	2.07679	30.631	2.84443	11.6417	18.5147	1.96496	protein_coding
ENSG00000132205	EMILIN2	61.1485	2.54753	0.679668	3.7482	0.000178111	0.00118717	25.0863	9.26896	8.89666	3.07113	22.273	4.69348	50.673	17.6819	20.2923	25.2959	37.3286	5.43329	127.722	118.44	546.131	51.4175	17.1432	9.82482	protein_coding
ENSG00000196502	SULT1A1	27.5746	2.54571	0.602326	4.22646	2.37401e-05	0.000203407	10.9071	1.85379	5.338	4.09484	11.9135	10.9515	0	3.36798	23.0595	75.8878	27.7979	38.9385	91.3786	49.0097	35.5554	63.0592	0	43.2292	protein_coding
ENSG00000141179	PCTP	10.7149	2.54267	0.454154	5.5987	2.15969e-08	3.87534e-07	1.09071	3.70758	2.669	3.07113	2.58989	1.56449	1.87678	5.89396	5.53427	21.216	7.94225	8.14993	12.4607	14.2945	12.7999	32.0147	36.3436	19.6496	protein_coding
ENSG00000149257	SERPINH1	4.88283	2.54162	0.749231	3.3923	0.000693087	0.00374217	3.27212	1.85379	0	2.04742	3.62584	1.56449	0	0	0	27.7439	6.3538	16.2999	2.07679	7.14724	1.42222	3.88057	2.74291	7.85986	protein_coding
ENSG00000206561	COLQ	9.1751	2.53809	0.638793	3.97325	7.08978e-05	0.000533045	1.09071	3.70758	2.669	5.11855	3.10786	4.69348	1.87678	0	1.84476	20.4	1.58845	10.8666	21.8063	11.2314	1.42222	56.2682	9.60019	7.85986	protein_coding
ENSG00000130584	ZBTB46	25.612	2.53625	0.481943	5.26256	1.42067e-07	2.15566e-06	3.27212	16.6841	3.55866	6.14226	9.84157	3.12899	11.2607	5.89396	8.30141	14.688	23.0325	23.5442	125.646	70.4514	73.9553	26.1938	15.7717	19.6496	protein_coding
ENSG00000188277	C15orf62	3.01099	2.53616	0.965462	2.62689	0.00861702	0.0308436	3.27212	0	0.889666	2.04742	0	0	0	0.841994	0.922379	0	11.1191	0.905548	0	3.0631	9.95551	1.94028	5.48582	13.7548	protein_coding
ENSG00000162337	LRP5	19.3965	2.53421	0.37758	6.71173	1.92337e-11	6.11452e-10	9.81637	12.0496	2.669	4.09484	3.62584	4.69348	11.2607	2.52598	2.76714	50.5919	26.2094	46.1829	35.3054	21.4417	22.7555	26.1938	17.8289	49.1241	protein_coding
ENSG00000183963	SMTN	19.2313	2.53333	0.600162	4.22109	2.43129e-05	0.00020737	15.2699	3.70758	4.44833	0	9.84157	3.12899	11.2607	4.20997	0	63.6479	19.0614	24.4498	42.5741	5.10517	4.26665	67.9099	39.7722	27.5095	protein_coding
ENSG00000164032	H2AFZ	486.181	2.53319	0.297027	8.52847	1.48299e-17	1.26703e-15	94.8916	139.961	111.208	188.363	199.939	93.8697	165.156	189.449	106.074	1128.53	984.044	1185.36	183.796	524.812	1203.2	584.026	723.443	945.148	protein_coding
ENSG00000223969	AC002456.1	2.36746	2.5328	0.979316	2.5863	0.00970122	0.0340199	0	1.85379	0	1.02371	1.03595	0.782247	1.87678	0	0	10.608	1.58845	1.8111	0	1.02103	15.6444	1.94028	3.42864	0	lncRNA
ENSG00000224905	AP001347.1	8.92353	2.52576	0.735369	3.43469	0.000593236	0.00328806	0	2.78069	0.889666	2.04742	3.10786	3.91124	3.75356	0	7.37903	9.79198	30.9748	53.4273	8.30715	2.04207	0	7.76114	4.8001	19.6496	lncRNA
ENSG00000163378	EOGT	11.1029	2.52391	0.367826	6.86171	6.80418e-12	2.2992e-10	3.27212	4.63448	2.669	5.11855	4.14382	2.34674	1.87678	2.52598	2.76714	22.848	27.0036	11.7721	17.6527	16.3366	12.7999	27.164	19.2004	15.7197	protein_coding
ENSG00000005381	MPO	131.797	2.52187	0.96478	2.61393	0.00895062	0.0318624	6.54425	28.7338	0	5.11855	99.4516	63.362	50.673	78.3055	19.37	79.1518	7.94225	95.0825	84.1099	1102.72	11.3777	611.19	23.3148	5.89489	protein_coding
ENSG00000176894	PXMP2	30.3684	2.52138	0.4455	5.65966	1.51669e-08	2.81561e-07	8.72566	14.8303	4.44833	6.14226	9.84157	15.6449	1.87678	7.57795	11.0685	116.688	52.4188	62.4828	25.9598	47.9886	5.68887	88.2829	47.3152	19.6496	protein_coding
ENSG00000132646	PCNA	54.2785	2.52102	0.378035	6.66875	2.57992e-11	7.96595e-10	11.9978	11.1227	24.021	16.3794	17.0932	13.2982	16.891	25.2598	9.22379	252.959	122.311	47.994	25.9598	83.7248	72.533	106.716	80.2302	39.2993	protein_coding
ENSG00000180340	FZD2	3.99384	2.52093	1.00445	2.50976	0.0120814	0.0405781	2.18142	2.78069	0	0	3.62584	1.56449	0	0	0	35.0879	0.794225	0.905548	3.11518	9.18931	2.84443	1.94028	0	7.85986	protein_coding
ENSG00000111321	LTBR	17.118	2.52093	0.703179	3.58505	0.000337008	0.00205916	8.72566	3.70758	3.55866	0	12.9494	0.782247	0	5.05196	10.1462	2.448	7.94225	15.3943	35.3054	49.0097	9.95551	58.2085	82.9731	1.96496	protein_coding
ENSG00000162437	RAVER2	10.5394	2.51983	0.599247	4.205	2.6108e-05	0.000220802	5.45354	1.85379	2.669	3.07113	2.58989	2.34674	0	5.05196	4.6119	17.136	11.1191	19.922	0	39.8204	25.5999	35.8953	2.74291	9.82482	protein_coding
ENSG00000164687	FABP5	25.0146	2.51955	0.475665	5.29691	1.1778e-07	1.8353e-06	3.27212	14.8303	2.669	7.16597	5.17977	2.34674	20.6446	3.36798	9.22379	22.848	38.917	49.8051	26.9982	15.3155	69.6886	26.1938	17.8289	113.968	protein_coding
ENSG00000163823	CCR1	17.1993	2.51461	0.769172	3.26924	0.00107837	0.00549862	2.18142	1.85379	5.338	0	9.84157	10.1692	5.63033	1.68399	9.22379	60.3839	7.94225	12.6777	1.03839	108.23	5.68887	8.73128	58.9726	0	protein_coding
ENSG00000170364	SETMAR	12.2957	2.51396	0.414668	6.06258	1.33957e-09	3.01544e-08	0	4.63448	1.77933	2.04742	7.25168	3.12899	3.75356	5.89396	3.68952	31.8239	30.1805	28.072	14.5375	23.4838	18.4888	17.4626	19.2004	5.89489	protein_coding
ENSG00000118762	PKD2	74.8443	2.51142	0.308085	8.15169	3.58872e-16	2.61959e-14	35.9934	19.4648	15.1243	29.6876	18.1292	18.7739	13.1374	30.3118	20.2923	273.359	126.282	79.6882	201.448	90.8721	62.5775	127.089	78.8587	106.108	protein_coding
ENSG00000157827	FMNL2	23.3934	2.50549	0.635577	3.94208	8.07792e-05	0.000597187	13.0885	7.41516	4.44833	5.11855	4.14382	8.60472	5.63033	3.36798	11.0685	52.2239	22.2383	57.955	1.03839	13.2735	108.088	0	26.7434	76.6336	protein_coding
ENSG00000198885	ITPRIPL1	15.2912	2.50374	0.375007	6.67653	2.44669e-11	7.60141e-10	2.18142	3.70758	4.44833	4.09484	2.07191	5.47573	7.50711	3.36798	10.1462	15.504	23.0325	32.5997	33.2286	26.5469	15.6444	36.8654	37.0293	11.7898	protein_coding
ENSG00000196576	PLXNB2	104.332	2.50267	0.319438	7.83462	4.70252e-15	2.71968e-13	27.2677	19.4648	20.4623	30.7113	41.9561	32.8544	50.673	24.4178	35.9728	287.231	153.285	100.516	93.4554	253.217	85.333	160.073	364.807	96.2833	protein_coding
ENSG00000088882	CPXM1	15.4684	2.49882	0.575705	4.34046	1.42184e-05	0.000130368	7.63496	0.926896	2.669	3.07113	2.58989	3.12899	20.6446	1.68399	2.76714	17.952	80.2167	3.62219	29.075	12.2524	38.3998	9.70142	18.5147	23.5796	protein_coding
ENSG00000196517	SLC6A9	2.30961	2.49838	0.936256	2.66848	0.00761948	0.0279313	1.09071	0.926896	0.889666	2.04742	0.517977	0	0	0.841994	0	16.32	2.38267	4.52774	0	1.02103	2.84443	6.79099	1.37146	0	protein_coding
ENSG00000004866	ST7	3.90506	2.49783	0.844247	2.95864	0.00308996	0.0133713	3.27212	0	0	2.04742	0	1.56449	1.87678	2.52598	0	10.608	5.55957	9.05548	1.03839	14.2945	0	6.79099	11.6574	0	protein_coding
ENSG00000113368	LMNB1	54.2389	2.49717	0.331609	7.53047	5.05581e-14	2.5008e-12	5.45354	17.611	15.1243	13.3082	23.309	20.3384	5.63033	23.5758	20.2923	175.44	113.574	89.6492	63.342	88.83	59.7331	44.6265	145.374	51.0891	protein_coding
ENSG00000128594	LRRC4	9.58509	2.49545	0.82011	3.04283	0.00234366	0.0105577	3.27212	0	3.55866	0	5.17977	3.91124	1.87678	5.89396	1.84476	39.9839	3.1769	0	57.1116	0	21.3332	10.6716	6.85728	7.85986	protein_coding
ENSG00000198933	TBKBP1	23.2882	2.49331	0.473434	5.26643	1.39104e-07	2.11498e-06	3.27212	4.63448	2.669	3.07113	4.14382	8.60472	18.7678	8.41994	11.9909	8.97598	30.9748	50.7107	50.8813	19.3997	14.2222	42.6863	106.288	29.4745	protein_coding
ENSG00000132535	DLG4	41.2453	2.49254	0.364982	6.82922	8.53777e-12	2.84032e-10	8.72566	11.1227	3.55866	14.3319	21.2371	11.7337	9.38389	15.1559	15.6804	75.8878	19.0614	57.955	89.3018	82.7038	28.4443	85.3725	135.774	56.984	protein_coding
ENSG00000117318	ID3	82.1225	2.49067	0.667401	3.73189	0.00019005	0.00125397	18.542	24.0993	23.1313	49.1381	19.1652	10.9515	24.3981	28.6278	24.9042	126.48	150.108	90.5548	2.07679	28.589	413.865	7.76114	5.48582	430.327	protein_coding
ENSG00000087253	LPCAT2	12.6412	2.48929	0.644366	3.86317	0.000111924	0.000787923	4.36283	3.70758	2.669	5.11855	1.55393	5.47573	1.87678	6.73595	2.76714	23.664	20.6498	13.5832	85.1482	16.3366	0	15.5223	0.685728	17.6847	protein_coding
ENSG00000169679	BUB1	9.8396	2.48852	0.586718	4.24143	2.22101e-05	0.00019216	5.45354	0.926896	5.338	0	1.55393	3.12899	9.38389	0.841994	1.84476	5.71199	46.8593	14.4888	4.15357	7.14724	27.0221	10.6716	10.9716	21.6146	protein_coding
ENSG00000154451	GBP5	26.0681	2.48832	0.44406	5.60356	2.09988e-08	3.78155e-07	11.9978	9.26896	5.338	7.16597	9.84157	7.04023	3.75356	7.57795	8.30141	11.424	34.9459	16.2999	40.4973	61.2621	55.4664	138.73	22.629	17.6847	protein_coding
ENSG00000181588	MEX3D	2.28862	2.48734	0.783093	3.1763	0.00149164	0.00721217	1.09071	0.926896	0.889666	1.02371	0.517977	0.782247	0	0	0.922379	10.608	0.794225	6.33883	3.11518	2.04207	2.84443	1.94028	3.42864	3.92993	protein_coding
ENSG00000196507	TCEAL3	23.8553	2.48635	0.605584	4.1057	4.03086e-05	0.000324128	7.63496	1.85379	6.22766	8.18968	5.17977	3.12899	16.891	6.73595	10.1462	49.7759	73.8629	47.0885	19.7295	13.2735	4.26665	16.4924	1.37146	137.548	protein_coding
ENSG00000004939	SLC4A1	97.6411	2.48187	0.727673	3.4107	0.000647961	0.00354563	50.1726	4.63448	119.215	32.7587	27.4528	6.25798	3.75356	7.57795	14.7581	549.983	109.603	173.865	113.185	19.3997	110.933	402.609	5.48582	5.89489	protein_coding
ENSG00000128311	TST	31.7244	2.4781	0.409082	6.05772	1.38067e-09	3.08486e-08	20.7235	7.41516	7.11733	0	8.80561	4.69348	9.38389	20.2079	9.22379	102.816	47.6535	62.4828	41.5357	63.3041	32.711	42.6863	70.63	19.6496	protein_coding
ENSG00000116667	C1orf21	8.7345	2.47621	0.661833	3.74144	0.000182968	0.0012147	2.18142	0	8.007	0	3.10786	0	0	2.52598	7.37903	4.89599	15.0903	5.43329	2.07679	25.5259	17.0666	20.373	21.9433	21.6146	protein_coding
ENSG00000125726	CD70	14.9124	2.47049	0.825287	2.99349	0.00275807	0.0121444	1.09071	3.70758	3.55866	2.04742	1.55393	0.782247	26.2749	0.841994	3.68952	14.688	82.5994	2.71664	10.3839	1.02103	15.6444	0	78.173	19.6496	protein_coding
ENSG00000151136	BTBD11	11.3666	2.46798	0.733406	3.3651	0.000765172	0.0040907	11.9978	0.926896	2.669	3.07113	2.07191	0.782247	0	3.36798	6.45665	4.07999	75.4514	29.8831	5.19197	28.589	15.6444	1.94028	0.685728	11.7898	protein_coding
ENSG00000004777	ARHGAP33	77.405	2.46633	0.353895	6.96911	3.18947e-12	1.14463e-10	20.7235	17.611	28.4693	20.4742	27.9708	35.2011	30.0284	25.2598	8.30141	281.519	73.0687	128.588	207.679	176.639	36.9776	119.327	92.5733	62.8789	protein_coding
ENSG00000198157	HMGN5	19.6804	2.46258	0.432759	5.69041	1.26732e-08	2.38508e-07	5.45354	4.63448	5.338	3.07113	8.80561	6.25798	5.63033	7.57795	6.45665	24.48	13.5018	76.9715	23.883	14.2945	12.7999	33.955	20.5718	80.5635	protein_coding
ENSG00000135503	ACVR1B	42.4432	2.46106	0.445996	5.51813	3.4263e-08	5.86386e-07	9.81637	8.34206	13.345	20.4742	11.3955	10.9515	11.2607	19.3659	11.9909	13.872	98.4839	70.6327	120.454	6.12621	152.177	43.6564	47.3152	94.3183	protein_coding
ENSG00000106125	FAM188B	2.55892	2.45738	0.920862	2.66856	0.00761775	0.0279313	2.18142	0	1.77933	2.04742	0	0	1.87678	0	0	0.815998	2.38267	6.33883	1.03839	2.04207	1.42222	17.4626	2.74291	3.92993	protein_coding
ENSG00000272468	AL021807.1	5.13143	2.45648	0.759251	3.23539	0.00121475	0.00607862	1.09071	0	1.77933	1.02371	3.62584	0.782247	0	5.05196	0	33.4559	1.58845	6.33883	4.15357	3.0631	15.6444	4.85071	2.05718	7.85986	lncRNA
ENSG00000090376	IRAK3	92.4988	2.45645	0.52366	4.69092	2.71973e-06	3.0249e-05	43.6283	35.222	15.1243	8.18968	24.8629	10.9515	63.8104	16.8399	39.6623	248.063	90.5416	120.438	59.1884	122.524	39.8221	441.415	9.60019	275.095	protein_coding
ENSG00000105610	KLF1	6.47337	2.4558	0.952702	2.57772	0.00994534	0.034714	1.09071	3.70758	2.669	0	6.7337	0	3.75356	0	0	39.1679	2.38267	21.7331	3.11518	1.02103	4.26665	26.1938	0.685728	0	protein_coding
ENSG00000163558	PRKCI	7.62957	2.45207	0.487002	5.03503	4.77764e-07	6.44896e-06	4.36283	0	1.77933	4.09484	3.62584	2.34674	1.87678	0.841994	1.84476	15.504	7.94225	15.3943	18.6911	5.10517	24.1777	7.76114	8.22874	13.7548	protein_coding
ENSG00000042832	TG	2.96715	2.4421	0.811638	3.00885	0.00262236	0.0116148	1.09071	0	0	2.04742	1.03595	0	1.87678	0	2.76714	3.26399	2.38267	9.96102	10.3839	0	1.42222	7.76114	5.48582	3.92993	protein_coding
ENSG00000157193	LRP8	73.2038	2.44155	0.419037	5.82657	5.65789e-09	1.13437e-07	29.4491	20.3917	18.683	16.3794	17.6112	16.4272	41.2891	25.2598	21.2147	48.1439	124.693	85.1215	394.589	60.241	35.5554	36.8654	180.346	145.407	protein_coding
ENSG00000156802	ATAD2	133.454	2.44122	0.46578	5.24114	1.59588e-07	2.39493e-06	67.6239	39.8565	53.38	35.8299	25.3809	39.1124	31.9052	49.6777	30.4385	69.3599	485.271	211.898	94.4938	52.0728	749.508	69.8502	68.5728	227.936	protein_coding
ENSG00000037241	RPL26L1	15.6153	2.43957	0.335065	7.28089	3.31633e-13	1.44544e-11	2.18142	2.78069	3.55866	11.2608	4.66179	5.47573	3.75356	5.05196	4.6119	31.8239	27.0036	23.5442	19.7295	27.5679	44.0887	25.2237	17.1432	21.6146	protein_coding
ENSG00000249786	EAF1-AS1	11.137	2.43944	0.804271	3.03311	0.00242046	0.0108656	0	1.85379	5.338	4.09484	6.21573	4.69348	3.75356	5.05196	0	10.608	0	10.8666	35.3054	9.18931	1.42222	91.1934	8.91446	1.96496	lncRNA
ENSG00000143162	CREG1	11.7513	2.43781	0.536776	4.54158	5.58341e-06	5.73091e-05	5.45354	1.85379	1.77933	3.07113	6.21573	5.47573	1.87678	1.68399	4.6119	17.952	3.97112	16.2999	24.9214	20.4207	59.7331	26.1938	4.11437	5.89489	protein_coding
ENSG00000233410	LINC01222	6.61969	2.43741	0.722713	3.37259	0.000744655	0.00399051	1.09071	4.63448	0	1.02371	3.10786	7.82247	0	0	0	2.448	17.4729	29.8831	13.4991	2.04207	11.3777	6.79099	6.17155	11.7898	lncRNA
ENSG00000253210	AC040970.1	3.17714	2.43541	0.895392	2.71994	0.00652938	0.0246708	2.18142	0	0.889666	0	0.517977	0	1.87678	0.841994	2.76714	0.815998	7.94225	9.05548	2.07679	2.04207	0	3.88057	0.685728	21.6146	lncRNA
ENSG00000113749	HRH2	10.8309	2.43324	0.46673	5.21337	1.85442e-07	2.7443e-06	1.09071	0	4.44833	2.04742	6.21573	3.12899	0	3.36798	8.30141	22.848	8.73647	13.5832	14.5375	29.61	9.95551	29.1043	14.4003	23.5796	protein_coding
ENSG00000160789	LMNA	90.8045	2.43062	0.724344	3.35562	0.000791873	0.00421053	28.3584	9.26896	8.89666	13.3082	20.2011	9.38697	133.251	30.3118	5.53427	14.688	101.661	14.4888	3.11518	225.649	263.11	46.5668	641.841	64.8438	protein_coding
ENSG00000187091	PLCD1	4.20681	2.43059	0.66691	3.64456	0.000267854	0.00168502	3.27212	0.926896	0.889666	0	2.07191	1.56449	0	1.68399	0.922379	7.34399	2.38267	16.2999	5.19197	18.3786	2.84443	1.94028	4.11437	5.89489	protein_coding
ENSG00000196440	ARMCX4	10.6886	2.43028	0.652202	3.72627	0.000194333	0.0012783	8.72566	6.48827	3.55866	0	1.55393	0.782247	7.50711	2.52598	0	19.584	19.0614	19.922	17.6527	6.12621	0	28.1341	7.54301	43.2292	protein_coding
ENSG00000174010	KLHL15	8.13732	2.41868	0.702977	3.44062	0.000580384	0.00322888	2.18142	0.926896	3.55866	5.11855	2.58989	6.25798	0	1.68399	0	8.97598	23.0325	8.14993	7.26875	1.02103	61.1553	5.82085	4.8001	3.92993	protein_coding
ENSG00000151692	RNF144A	5.88015	2.41714	0.649169	3.72344	0.000196528	0.00128992	1.09071	0	0.889666	2.04742	3.62584	0.782247	5.63033	1.68399	1.84476	12.24	3.97112	1.8111	15.5759	19.3997	1.42222	17.4626	14.4003	1.96496	protein_coding
ENSG00000125430	HS3ST3B1	8.95328	2.41252	0.731214	3.29934	0.000969118	0.00501985	0	1.85379	6.22766	0	2.58989	3.91124	3.75356	5.05196	1.84476	8.15998	0	1.8111	18.6911	7.14724	59.7331	19.4028	15.086	5.89489	protein_coding
ENSG00000184357	HIST1H1B	18.9893	2.40632	0.81588	2.94936	0.00318431	0.0137353	1.09071	23.1724	6.22766	2.04742	10.3595	3.12899	1.87678	1.68399	3.68952	0	37.3286	19.0165	10.3839	1.02103	45.5109	0.970142	30.8578	143.442	protein_coding
ENSG00000136830	FAM129B	15.0997	2.40259	0.533334	4.50485	6.64192e-06	6.712e-05	2.18142	3.70758	3.55866	2.04742	11.9135	3.91124	1.87678	10.1039	2.76714	13.872	19.0614	20.8276	10.3839	31.6521	8.5333	22.3133	93.259	9.82482	protein_coding
ENSG00000266378	AC005224.3	10.7986	2.4008	0.743521	3.22897	0.00124239	0.00619013	8.72566	0	4.44833	1.02371	1.55393	2.34674	3.75356	8.41994	0.922379	12.24	1.58845	0.905548	70.6107	7.14724	38.3998	14.5521	15.7717	1.96496	lncRNA
ENSG00000189171	S100A13	91.8144	2.39744	0.419869	5.70998	1.1299e-08	2.14253e-07	23.9956	31.5144	34.697	34.8061	22.273	16.4272	31.9052	26.9438	41.5071	40.7999	420.145	268.042	90.3402	105.167	214.755	64.0294	28.1148	157.197	protein_coding
ENSG00000204815	TTC25	1.32929	2.39642	0.953559	2.51313	0.0119666	0.0403094	0	1.85379	0.889666	0	0	0	0	0.841994	0	3.26399	1.58845	0.905548	3.11518	3.0631	2.84443	2.91043	0.685728	1.96496	protein_coding
ENSG00000261997	AC007336.1	5.7409	2.39526	0.884957	2.70664	0.00679687	0.0254747	2.18142	3.70758	0.889666	0	0.517977	4.69348	0	4.20997	0	6.52799	4.76535	6.33883	39.4589	18.3786	0	9.70142	0	1.96496	lncRNA
ENSG00000164402	SEPT8	3.84118	2.39312	0.724178	3.3046	0.000951122	0.00494025	1.09071	0	0.889666	3.07113	2.07191	1.56449	0	0.841994	0.922379	4.07999	15.8845	6.33883	9.34554	3.0631	1.42222	0	4.8001	13.7548	protein_coding
ENSG00000119139	TJP2	16.0149	2.39049	0.406209	5.8849	3.98307e-09	8.18216e-08	3.27212	3.70758	2.669	8.18968	6.7337	1.56449	5.63033	10.1039	4.6119	22.032	34.1517	48.8996	22.8447	34.7152	12.7999	40.746	15.7717	9.82482	protein_coding
ENSG00000115902	SLC1A4	53.6173	2.39048	0.501553	4.76616	1.87769e-06	2.19215e-05	27.2677	13.9034	11.5657	12.2845	11.9135	18.7739	30.0284	19.3659	11.0685	14.688	347.87	34.4108	57.1116	123.545	95.2885	29.1043	91.2018	15.7197	protein_coding
ENSG00000119969	HELLS	97.4502	2.38636	0.325108	7.3402	2.13267e-13	9.51603e-12	32.7212	22.2455	23.1313	29.6876	29.0067	40.6769	28.1517	29.4698	46.119	108.528	334.369	265.325	61.2652	61.2621	216.177	125.148	106.288	194.531	protein_coding
ENSG00000167553	TUBA1C	129.653	2.38605	0.25436	9.38061	6.55927e-21	9.3665e-19	27.2677	37.0758	53.38	40.9484	41.9561	30.5076	56.3033	61.4656	27.6714	262.751	298.629	172.054	174.45	200.123	322.843	124.178	292.12	110.038	protein_coding
ENSG00000165244	ZNF367	10.6602	2.38422	0.589872	4.04192	5.30147e-05	0.000413047	5.45354	0.926896	1.77933	6.14226	6.21573	3.12899	1.87678	5.05196	0	57.1199	32.5632	21.7331	7.26875	3.0631	12.7999	10.6716	8.22874	7.85986	protein_coding
ENSG00000165501	LRR1	19.7225	2.38191	0.388575	6.12986	8.79564e-10	2.06656e-08	1.09071	9.26896	6.22766	12.2845	5.17977	9.38697	5.63033	2.52598	5.53427	47.3279	52.4188	49.8051	14.5375	14.2945	24.1777	32.0147	24.0005	39.2993	protein_coding
ENSG00000157404	KIT	4.72852	2.38183	0.750141	3.17517	0.00149748	0.00723421	0	2.78069	0.889666	2.04742	1.03595	3.12899	0	3.36798	0	7.34399	4.76535	4.52774	3.11518	34.7152	1.42222	10.6716	1.37146	3.92993	protein_coding
ENSG00000100427	MLC1	25.775	2.37924	0.551608	4.31328	1.6085e-05	0.00014466	6.54425	2.78069	5.338	5.11855	17.0932	7.04023	20.6446	7.57795	3.68952	17.136	9.5307	38.033	3.11518	123.545	38.3998	40.746	96.0019	21.6146	protein_coding
ENSG00000235576	LINC01871	3.55159	2.37312	0.739072	3.21095	0.00132295	0.00652451	0	0	2.669	1.02371	2.07191	0	1.87678	1.68399	0.922379	11.424	3.1769	3.62219	5.19197	13.2735	0	7.76114	1.37146	7.85986	lncRNA
ENSG00000036530	CYP46A1	7.7135	2.37243	0.784286	3.02496	0.00248666	0.0110955	3.27212	0.926896	0	4.09484	1.03595	6.25798	5.63033	1.68399	0	11.424	22.2383	9.96102	11.4223	0	25.5999	5.82085	0	29.4745	protein_coding
ENSG00000171115	GIMAP8	18.9763	2.37239	0.736399	3.22161	0.00127474	0.006322	13.0885	2.78069	7.11733	1.02371	13.9854	1.56449	1.87678	5.05196	8.30141	81.5998	0	8.14993	28.0366	106.188	7.11108	45.5967	6.17155	3.92993	protein_coding
ENSG00000171056	SOX7	11.3588	2.36757	0.813609	2.90997	0.00361468	0.0152851	3.27212	7.41516	5.338	4.09484	2.07191	3.91124	3.75356	2.52598	0.922379	90.5758	5.55957	13.5832	2.07679	0	45.5109	0	2.05718	11.7898	protein_coding
ENSG00000108175	ZMIZ1	150.802	2.36713	0.262557	9.01569	1.95627e-19	2.2628e-17	52.354	44.491	51.6006	26.6165	33.6685	18.7739	103.223	49.6777	66.4113	291.311	161.228	351.352	251.291	243.006	234.666	192.088	285.263	257.41	protein_coding
ENSG00000263603	AC127024.2	5.80351	2.36371	0.729567	3.23988	0.0011958	0.00599716	2.18142	0.926896	5.338	3.07113	2.58989	2.34674	0	0	0	4.07999	0	18.111	15.5759	21.4417	1.42222	8.73128	6.85728	11.7898	lncRNA
ENSG00000250510	GPR162	5.15927	2.36138	0.832955	2.83495	0.00458334	0.0185268	2.18142	0	1.77933	0	4.14382	0.782247	3.75356	0.841994	1.84476	6.52799	0	4.52774	1.03839	36.7572	9.95551	7.76114	10.9716	0	protein_coding
ENSG00000108953	YWHAE	410.369	2.35702	0.304659	7.73658	1.02123e-14	5.6665e-13	167.969	108.447	101.422	165.841	141.408	144.716	50.673	149.875	173.407	1070.59	806.138	532.462	345.785	310.395	1493.33	483.131	469.038	672.018	protein_coding
ENSG00000092621	PHGDH	16.5925	2.35376	0.724692	3.24795	0.00116241	0.00586945	0	7.41516	8.89666	5.11855	9.84157	7.04023	1.87678	2.52598	5.53427	30.1919	67.5091	31.6942	2.07679	3.0631	62.5775	0	49.3724	3.92993	protein_coding
ENSG00000221995	TIAF1	6.66283	2.35285	0.556942	4.22458	2.39387e-05	0.000204759	1.09071	1.85379	4.44833	0	1.03595	1.56449	5.63033	3.36798	1.84476	20.4	10.3249	17.2054	17.6527	13.2735	2.84443	6.79099	2.74291	7.85986	NA
ENSG00000165424	ZCCHC24	11.7293	2.3526	0.568007	4.14185	3.44516e-05	0.000282778	6.54425	5.56137	7.11733	0	5.69775	3.12899	1.87678	4.20997	0	18.768	10.3249	66.105	15.5759	21.4417	8.5333	3.88057	20.5718	11.7898	protein_coding
ENSG00000111785	RIC8B	11.7034	2.3509	0.451188	5.21047	1.88359e-07	2.78227e-06	2.18142	2.78069	8.89666	4.09484	3.10786	3.91124	1.87678	0.841994	6.45665	37.5359	6.3538	19.922	32.1902	12.2524	9.95551	24.2536	14.4003	19.6496	protein_coding
ENSG00000163517	HDAC11	6.58221	2.34843	0.648535	3.62113	0.000293314	0.00182556	1.09071	2.78069	0	2.04742	2.07191	0	7.50711	0	5.53427	3.26399	2.38267	15.3943	11.4223	15.3155	5.68887	22.3133	15.7717	5.89489	protein_coding
ENSG00000071205	ARHGAP10	7.31537	2.346	0.919134	2.5524	0.0106984	0.0368381	2.18142	0	5.338	0	4.14382	0.782247	0	5.89396	2.76714	4.07999	0.794225	31.6942	3.11518	37.7783	0	23.2834	0	9.82482	protein_coding
ENSG00000198429	ZNF69	10.8971	2.34255	0.584525	4.00762	6.13349e-05	0.000468407	2.18142	4.63448	4.44833	0	3.62584	6.25798	0	0.841994	9.22379	2.448	15.0903	17.2054	57.1116	17.3576	8.5333	10.6716	10.9716	25.5445	protein_coding
ENSG00000166451	CENPN	13.0165	2.33825	0.520013	4.49653	6.90721e-06	6.96138e-05	5.45354	2.78069	2.669	6.14226	3.62584	0.782247	5.63033	4.20997	8.30141	39.9839	68.3033	14.4888	5.19197	11.2314	22.7555	10.6716	10.2859	11.7898	protein_coding
ENSG00000121957	GPSM2	17.6739	2.33817	0.382992	6.10502	1.02789e-09	2.37426e-08	4.36283	1.85379	9.78633	2.04742	4.66179	7.82247	3.75356	9.26193	8.30141	28.5599	26.2094	47.0885	41.5357	38.7993	19.911	34.9251	9.60019	19.6496	protein_coding
ENSG00000163950	SLBP	50.7971	2.33652	0.435863	5.36067	8.29117e-08	1.32915e-06	20.7235	6.48827	14.2347	28.6639	10.8775	17.9917	9.38389	22.7338	19.37	79.1518	156.462	67.9161	85.1482	19.3997	209.066	20.373	28.1148	98.2482	protein_coding
ENSG00000112242	E2F3	72.3105	2.33507	0.316672	7.37377	1.65871e-13	7.49009e-12	17.4513	14.8303	36.4763	29.6876	22.273	18.7739	15.0142	23.5758	35.9728	61.1999	186.643	171.148	152.644	37.7783	150.755	131.939	63.7727	131.653	protein_coding
ENSG00000254726	MEX3A	13.9546	2.33269	0.801126	2.91177	0.0035939	0.0152315	3.27212	6.48827	5.338	2.04742	2.07191	0.782247	15.0142	4.20997	3.68952	130.56	0.794225	7.24438	9.34554	0	19.911	0.970142	17.8289	21.6146	protein_coding
ENSG00000175711	B3GNTL1	30.0437	2.33099	0.422466	5.51757	3.43719e-08	5.8733e-07	4.36283	13.9034	8.89666	7.16597	10.3595	9.38697	15.0142	10.1039	11.0685	17.136	21.4441	89.6492	48.8045	77.5986	8.5333	108.656	31.5435	47.1591	protein_coding
ENSG00000261971	MMP25-AS1	29.8004	2.33014	0.595075	3.91571	9.01388e-05	0.000655424	6.54425	9.26896	20.4623	20.4742	8.28763	7.04023	1.87678	10.1039	4.6119	243.168	19.0614	29.8831	58.15	6.12621	8.5333	42.6863	18.5147	21.6146	lncRNA
ENSG00000133069	TMCC2	27.5109	2.3299	0.819628	2.84264	0.00447418	0.0181833	11.9978	6.48827	29.359	9.21339	7.76966	3.12899	0	8.41994	5.53427	243.984	27.0036	21.7331	17.6527	1.02103	28.4443	72.7607	0.685728	0	protein_coding
ENSG00000143416	SELENBP1	22.3238	2.32981	0.843713	2.76138	0.00575576	0.0222836	13.0885	0	25.8003	10.2371	6.7337	0	1.87678	3.36798	5.53427	163.2	12.7076	35.3164	18.6911	13.2735	15.6444	75.6711	0.685728	0	protein_coding
ENSG00000237945	LINC00649	45.7623	2.32782	0.503068	4.62725	3.70559e-06	3.98291e-05	22.9049	6.48827	32.9176	3.07113	25.3809	8.60472	1.87678	18.5239	15.6804	110.976	115.163	185.637	48.8045	74.5355	9.95551	35.8953	26.7434	80.5635	lncRNA
ENSG00000267041	ZNF850	8.45243	2.32738	0.534516	4.35417	1.3357e-05	0.000123981	1.09071	5.56137	0.889666	4.09484	3.10786	3.12899	5.63033	0.841994	1.84476	27.7439	9.5307	34.4108	12.4607	5.10517	15.6444	11.6417	5.48582	3.92993	protein_coding
ENSG00000168487	BMP1	11.5781	2.32251	0.560669	4.14238	3.43714e-05	0.000282274	2.18142	0.926896	7.11733	1.02371	5.17977	1.56449	7.50711	4.20997	5.53427	26.9279	3.1769	28.072	15.5759	35.7362	0	17.4626	22.629	23.5796	protein_coding
ENSG00000224597	SVIL-AS1	6.01985	2.3138	0.638815	3.62202	0.000292312	0.00182008	1.09071	0.926896	2.669	4.09484	3.62584	2.34674	0	1.68399	0.922379	16.32	0	4.52774	7.26875	22.4628	2.84443	17.4626	10.2859	9.82482	transcribed_unprocessed_pseudogene
ENSG00000137486	ARRB1	39.3777	2.31153	0.543201	4.25538	2.0869e-05	0.000182023	9.81637	4.63448	20.4623	2.04742	24.8629	7.82247	26.2749	13.4719	10.1462	13.872	22.2383	50.7107	149.529	144.987	12.7999	115.447	67.8871	11.7898	protein_coding
ENSG00000128039	SRD5A3	6.30277	2.31032	0.489161	4.72302	2.32369e-06	2.62125e-05	2.18142	0.926896	2.669	3.07113	2.58989	1.56449	1.87678	2.52598	1.84476	14.688	5.55957	13.5832	9.34554	21.4417	5.68887	11.6417	10.2859	1.96496	protein_coding
ENSG00000149782	PLCB3	13.2673	2.31022	0.367403	6.28799	3.21606e-10	8.18272e-09	1.09071	3.70758	1.77933	5.11855	7.25168	3.91124	7.50711	6.73595	2.76714	15.504	11.1191	16.2999	28.0366	23.4838	22.7555	23.2834	32.9149	25.5445	protein_coding
ENSG00000183850	ZNF730	2.14607	2.30859	0.908808	2.54024	0.0110777	0.0378838	0	1.85379	0	0	1.55393	0	0	1.68399	0.922379	4.89599	11.1191	4.52774	2.07679	0	5.68887	0.970142	1.37146	1.96496	protein_coding
ENSG00000167523	SPATA33	46.25	2.30772	0.471778	4.89154	1.00049e-06	1.25474e-05	7.63496	24.0993	18.683	21.4979	12.9494	14.0805	11.2607	16.8399	12.9133	244.8	38.917	34.4108	152.644	40.8414	14.2222	108.656	38.4008	19.6496	protein_coding
ENSG00000183077	AFMID	28.4341	2.30447	0.368508	6.25351	4.01333e-10	1.00086e-08	10.9071	6.48827	7.11733	23.5453	11.3955	5.47573	1.87678	12.6299	5.53427	34.2719	21.4441	101.421	37.3822	37.7783	41.2443	64.9995	41.1437	47.1591	protein_coding
ENSG00000167325	RRM1	91.2983	2.2971	0.224327	10.2399	1.31336e-24	2.82128e-22	29.4491	19.4648	32.028	42.9958	29.0067	30.5076	18.7678	26.9438	47.0413	184.416	224.766	166.621	106.955	106.188	184.888	115.447	120.688	157.197	protein_coding
ENSG00000178038	ALS2CL	4.59824	2.29404	0.694529	3.30302	0.000956501	0.00496133	5.45354	0	2.669	0	3.62584	0	0	1.68399	0	8.97598	2.38267	9.05548	14.5375	7.14724	2.84443	2.91043	11.6574	9.82482	protein_coding
ENSG00000162377	COA7	10.5218	2.29355	0.403961	5.67766	1.3655e-08	2.54752e-07	1.09071	1.85379	4.44833	3.07113	3.62584	2.34674	5.63033	7.57795	2.76714	10.608	11.9134	23.5442	13.4991	15.3155	15.6444	12.6118	32.2292	21.6146	protein_coding
ENSG00000196584	XRCC2	8.77507	2.29312	0.44579	5.14395	2.69021e-07	3.81628e-06	2.18142	0.926896	4.44833	1.02371	4.14382	2.34674	3.75356	2.52598	5.53427	13.872	12.7076	29.8831	7.26875	15.3155	8.5333	23.2834	12.3431	7.85986	protein_coding
ENSG00000189283	FHIT	76.5964	2.29234	0.491148	4.6673	3.05182e-06	3.357e-05	38.1748	24.0993	29.359	16.3794	29.0067	13.2982	26.2749	18.5239	38.7399	280.703	153.285	110.477	235.715	70.4514	116.622	46.5668	1.37146	129.688	protein_coding
ENSG00000051596	THOC3	8.92528	2.29146	0.768545	2.98156	0.00286784	0.0125615	9.81637	0.926896	4.44833	8.18968	1.55393	1.56449	0	0.841994	0	57.9359	14.296	6.33883	12.4607	0	24.1777	4.85071	3.42864	9.82482	protein_coding
ENSG00000273983	HIST1H3G	2.50676	2.28588	0.910313	2.51109	0.012036	0.0404716	1.09071	2.78069	0	0	0.517977	0.782247	1.87678	0	0.922379	4.89599	2.38267	4.52774	0	0	15.6444	0.970142	4.8001	3.92993	protein_coding
ENSG00000241399	CD302	8.17681	2.28155	0.934615	2.44117	0.0146399	0.047495	1.09071	0	3.55866	0	8.28763	0.782247	0	4.20997	6.45665	3.26399	0	0	17.6527	55.1359	8.5333	30.0744	6.17155	1.96496	protein_coding
ENSG00000142686	C1orf216	7.38498	2.27797	0.671052	3.39462	0.000687237	0.00371726	0	3.70758	1.77933	4.09484	6.21573	2.34674	3.75356	0.841994	0	8.15998	11.1191	11.7721	21.8063	17.3576	0	19.4028	20.5718	0	protein_coding
ENSG00000162062	C16orf59	5.06159	2.27717	0.585235	3.89104	9.98146e-05	0.00071472	0	3.70758	0	2.04742	1.55393	3.91124	1.87678	2.52598	0	19.584	7.14802	10.8666	3.11518	9.18931	4.26665	5.82085	9.60019	5.89489	protein_coding
ENSG00000042317	SPATA7	6.18296	2.27371	0.52761	4.30945	1.63663e-05	0.000147101	3.27212	1.85379	0.889666	2.04742	2.58989	0	3.75356	3.36798	1.84476	1.632	8.73647	15.3943	18.6911	14.2945	7.11108	7.76114	8.22874	9.82482	protein_coding
ENSG00000133315	MACROD1	10.0147	2.27187	0.612291	3.71044	0.000206903	0.00135093	3.27212	0.926896	3.55866	1.02371	3.62584	4.69348	13.1374	0	2.76714	4.07999	6.3538	12.6777	14.5375	8.16828	9.95551	14.5521	65.1442	11.7898	protein_coding
ENSG00000213468	FIRRE	12.1085	2.27022	0.737183	3.07959	0.00207288	0.00949749	10.9071	1.85379	1.77933	4.09484	0.517977	7.04023	0	3.36798	7.37903	0.815998	23.8267	15.3943	14.5375	1.02103	81.0663	1.94028	10.9716	31.4394	lncRNA
ENSG00000156052	GNAQ	104.423	2.26904	0.344064	6.59482	4.25778e-11	1.26281e-09	69.8053	16.6841	21.352	31.735	36.7764	13.2982	48.7962	40.4157	46.119	121.584	106.426	128.588	257.522	284.869	129.422	303.654	157.717	64.8438	protein_coding
ENSG00000087884	AAMDC	23.4682	2.26886	0.322851	7.02758	2.10153e-12	7.74525e-11	1.09071	13.9034	8.89666	5.11855	11.3955	6.25798	11.2607	10.9459	3.68952	26.9279	40.5055	55.2384	28.0366	56.1569	28.4443	44.6265	40.458	29.4745	protein_coding
ENSG00000240498	CDKN2B-AS1	3.41473	2.26886	0.735355	3.08539	0.00203284	0.00933941	3.27212	0	0.889666	1.02371	2.58989	0	1.87678	0	0.922379	8.15998	0	8.14993	8.30715	4.08414	9.95551	2.91043	3.42864	5.89489	lncRNA
ENSG00000197461	PDGFA	24.7369	2.26867	0.811672	2.79506	0.00518905	0.0205158	22.9049	4.63448	3.55866	3.07113	10.8775	4.69348	20.6446	6.73595	0	2.448	71.4802	118.627	10.3839	1.02103	2.84443	1.94028	19.8861	139.512	protein_coding
ENSG00000100342	APOL1	25.8746	2.26855	0.637075	3.56089	0.000369604	0.0022238	5.45354	9.26896	8.007	4.09484	12.9494	10.9515	3.75356	8.41994	16.6028	50.5919	5.55957	27.1664	24.9214	181.744	0	55.2981	37.0293	3.92993	protein_coding
ENSG00000143751	SDE2	73.7359	2.26812	0.669292	3.38884	0.000701897	0.0037843	47.9912	9.26896	21.352	37.8773	15.0213	23.4674	16.891	22.7338	33.2056	24.48	119.134	19.0165	107.993	4.08414	682.664	11.6417	16.4575	113.968	protein_coding
ENSG00000221963	APOL6	78.8028	2.26763	0.267732	8.46977	2.45882e-17	2.04272e-15	32.7212	19.4648	35.5866	15.3557	31.5966	26.5964	28.1517	27.7858	26.749	148.512	113.574	123.154	87.225	260.364	162.133	127.089	97.3734	55.019	protein_coding
ENSG00000158578	ALAS2	108.075	2.26556	0.907861	2.49549	0.0125782	0.0419188	47.9912	3.70758	166.368	30.7113	38.8483	17.2094	1.87678	6.73595	21.2147	768.67	41.2997	220.048	117.338	14.2945	71.1108	372.535	3.42864	1.96496	protein_coding
ENSG00000277734	TRAC	489.645	2.26532	0.630388	3.59353	0.000326225	0.00200059	151.608	167.768	306.045	27.6402	347.045	124.377	168.91	106.091	118.065	636.479	536.102	263.514	212.871	176.639	41.2443	159.103	4735.64	534.47	TR_C_gene
ENSG00000124074	ENKD1	15.6964	2.26399	0.32347	6.99907	2.57664e-12	9.33613e-11	3.27212	4.63448	6.22766	7.16597	8.28763	4.69348	1.87678	4.20997	6.45665	27.7439	25.4152	31.6942	14.5375	42.8835	24.1777	27.164	18.5147	23.5796	protein_coding
ENSG00000143179	UCK2	20.697	2.26087	0.41371	5.46487	4.63239e-08	7.73969e-07	4.36283	10.1959	5.338	9.21339	4.14382	6.25798	13.1374	1.68399	11.9909	30.1919	11.9134	28.9775	71.6491	52.0728	19.911	42.6863	37.0293	11.7898	protein_coding
ENSG00000188313	PLSCR1	41.7757	2.25813	0.586832	3.848	0.000119084	0.00083403	19.6327	6.48827	8.89666	7.16597	21.2371	19.5562	18.7678	6.73595	21.2147	32.6399	7.14802	21.7331	50.8813	115.377	312.888	40.746	5.48582	35.3694	protein_coding
ENSG00000174749	C4orf32	31.7349	2.25501	0.454194	4.96485	6.87534e-07	8.91246e-06	4.36283	9.26896	6.22766	12.2845	9.84157	3.12899	33.782	7.57795	15.6804	38.3519	13.5018	23.5442	50.8813	59.22	79.6441	118.357	67.8871	17.6847	protein_coding
ENSG00000272733	AP000345.2	41.0958	2.25435	0.650602	3.46502	0.000530201	0.00299385	16.3606	22.2455	3.55866	8.18968	17.0932	10.1692	31.9052	3.36798	16.6028	351.695	24.621	33.5053	103.839	4.08414	11.3777	23.2834	48.001	9.82482	lncRNA
ENSG00000088727	KIF9	12.7424	2.25308	0.432689	5.20715	1.91767e-07	2.82428e-06	5.45354	6.48827	5.338	8.18968	3.10786	2.34674	0	5.05196	2.76714	7.34399	24.621	10.8666	21.8063	15.3155	54.0442	16.4924	18.5147	21.6146	protein_coding
ENSG00000136810	TXN	55.1609	2.25254	0.211256	10.6626	1.52265e-26	4.0886e-24	15.2699	19.4648	18.683	18.4268	18.6472	22.6852	15.0142	23.5758	19.37	68.5439	87.3647	66.105	93.4554	127.629	83.9108	131.939	96.0019	66.8088	protein_coding
ENSG00000148143	ZNF462	3.52458	2.24711	0.855078	2.62796	0.00858987	0.0307831	2.18142	0.926896	2.669	0	0.517977	2.34674	0	0	1.84476	0.815998	3.97112	11.7721	0	1.02103	9.95551	0.970142	4.8001	19.6496	protein_coding
ENSG00000179862	CITED4	30.7011	2.247	0.469639	4.78452	1.71396e-06	2.01508e-05	8.72566	12.0496	7.11733	6.14226	12.9494	10.9515	5.63033	22.7338	9.22379	8.15998	23.8267	34.4108	47.7661	66.3673	12.7999	74.7009	155.66	33.4044	protein_coding
ENSG00000144677	CTDSPL	17.7472	2.24369	0.724043	3.09883	0.00194285	0.00900295	19.6327	0	3.55866	2.04742	5.17977	4.69348	5.63033	14.3139	0.922379	22.032	13.5018	24.4498	25.9598	36.7572	2.84443	131.939	2.05718	3.92993	protein_coding
ENSG00000153902	LGI4	16.7591	2.2424	0.73652	3.04459	0.00232999	0.0105087	11.9978	4.63448	2.669	1.02371	3.62584	3.91124	15.0142	5.05196	5.53427	0.815998	81.0109	8.14993	23.883	2.04207	66.8442	5.82085	0.685728	58.9489	protein_coding
ENSG00000170275	CRTAP	84.9004	2.24209	0.288873	7.76148	8.39418e-15	4.69231e-13	18.542	17.611	20.4623	35.8299	35.7404	20.3384	28.1517	37.0477	52.5756	237.456	156.462	106.855	248.176	99.0404	96.7107	87.3128	102.173	127.723	protein_coding
ENSG00000245532	NEAT1	2120.24	2.24035	0.285722	7.84103	4.46873e-15	2.59445e-13	1035.08	604.336	788.244	738.095	812.188	529.581	848.304	677.805	632.752	1602.62	2740.87	2147.05	8114	2212.58	3076.25	4795.41	1910.44	4898.66	lncRNA
ENSG00000138614	VWA9	7.26549	2.23964	0.630642	3.55136	0.000383247	0.00228868	1.09071	0	7.11733	6.14226	1.55393	3.12899	0	3.36798	0	36.7199	14.296	2.71664	7.26875	7.14724	14.2222	8.73128	5.48582	11.7898	protein_coding
ENSG00000186818	LILRB4	19.4758	2.23823	0.603516	3.70865	0.000208365	0.0013593	4.36283	0.926896	12.4553	12.2845	8.80561	4.69348	7.50711	5.89396	4.6119	4.89599	23.0325	22.6387	7.26875	137.84	5.68887	24.2536	55.544	7.85986	protein_coding
ENSG00000176595	KBTBD11	25.7362	2.23799	0.511234	4.37761	1.19986e-05	0.000113189	4.36283	3.70758	11.5657	1.02371	8.80561	3.91124	30.0284	10.1039	10.1462	21.216	34.1517	84.2159	24.9214	56.1569	2.84443	77.6114	41.1437	37.3343	protein_coding
ENSG00000184489	PTP4A3	76.3204	2.23759	0.477394	4.68709	2.77117e-06	3.07343e-05	19.6327	15.7572	24.021	27.6402	41.9561	22.6852	22.5213	33.6798	32.2833	372.911	63.538	40.7496	52.9581	144.987	8.5333	93.1336	288.006	68.7738	protein_coding
ENSG00000189403	HMGB1	926.389	2.23455	0.346729	6.44466	1.15862e-10	3.23232e-09	410.106	307.729	358.535	403.342	287.477	331.673	170.787	309.012	342.203	1087.73	4245.13	963.503	812.023	495.202	1915.73	752.83	980.591	2501.4	protein_coding
ENSG00000272870	AC097534.2	17.2939	2.23308	0.653389	3.41769	0.000631551	0.00346593	6.54425	7.41516	2.669	7.16597	4.66179	7.82247	3.75356	8.41994	5.53427	0.815998	3.1769	6.33883	94.4938	8.16828	5.68887	43.6564	14.4003	80.5635	lncRNA
ENSG00000187193	MT1X	14.6584	2.23276	0.644243	3.4657	0.000528845	0.00298844	7.63496	2.78069	5.338	7.16597	9.84157	0.782247	0	10.9459	0.922379	1.632	23.8267	11.7721	44.6509	5.10517	62.5775	20.373	44.5723	3.92993	protein_coding
ENSG00000113810	SMC4	442.486	2.23269	0.342471	6.51934	7.06175e-11	2.03424e-09	223.595	128.838	218.858	140.248	143.48	150.191	135.128	155.769	100.539	402.287	1490.76	565.062	456.893	237.901	1732.26	460.818	363.436	858.69	protein_coding
ENSG00000214189	ZNF788	3.35847	2.23248	0.784846	2.84449	0.00444828	0.0181126	0	2.78069	3.55866	0	0	1.56449	1.87678	0	0.922379	1.632	1.58845	9.96102	10.3839	2.04207	1.42222	4.85071	4.11437	13.7548	transcribed_unprocessed_pseudogene
ENSG00000130816	DNMT1	305.522	2.23226	0.351437	6.3518	2.12807e-10	5.68379e-09	128.704	65.8096	139.678	108.513	78.7325	114.99	67.564	118.721	141.124	690.335	808.521	334.147	454.816	178.681	1100.8	152.312	200.918	615.034	protein_coding
ENSG00000163535	SGOL2	26.5862	2.22796	0.352908	6.31315	2.7342e-10	7.07646e-09	7.63496	8.34206	8.89666	16.3794	7.76966	17.9917	3.75356	10.1039	2.76714	62.0159	42.0939	67.0105	25.9598	28.589	38.3998	58.2085	56.9154	15.7197	protein_coding
ENSG00000183527	PSMG1	26.5743	2.22545	0.372566	5.97329	2.32511e-09	4.93824e-08	7.63496	6.48827	5.338	14.3319	19.1652	8.60472	3.75356	12.6299	4.6119	46.5119	64.3322	68.8216	24.9214	79.6407	25.5999	32.0147	34.2864	19.6496	protein_coding
ENSG00000166002	SMCO4	4.5737	2.2168	0.790178	2.80544	0.00502475	0.0199604	0	0	2.669	1.02371	5.69775	1.56449	0	1.68399	0.922379	23.664	2.38267	3.62219	3.11518	17.3576	0	10.6716	2.05718	5.89489	protein_coding
ENSG00000272836	AL022328.1	2.30617	2.21414	0.829365	2.66968	0.00759234	0.0278715	1.09071	0.926896	0	1.02371	0.517977	1.56449	0	1.68399	0	8.15998	0.794225	0.905548	2.07679	5.10517	2.84443	0.970142	2.05718	11.7898	lncRNA
ENSG00000148450	MSRB2	69.1887	2.21191	0.423428	5.22381	1.75277e-07	2.61214e-06	21.8142	26.88	24.9107	18.4268	26.9348	14.8627	20.6446	34.5218	32.2833	199.92	67.5091	230.915	77.8795	162.345	7.11108	135.82	113.145	29.4745	protein_coding
ENSG00000274750	HIST1H3E	5.27301	2.20998	0.808107	2.73476	0.00624265	0.0237587	1.09071	0	2.669	1.02371	4.14382	0.782247	0	4.20997	1.84476	21.216	1.58845	9.05548	6.23036	1.02103	5.68887	2.91043	0	31.4394	protein_coding
ENSG00000262877	AC110285.2	11.8016	2.20896	0.661461	3.33951	0.000839263	0.00442963	4.36283	16.6841	1.77933	1.02371	8.28763	3.12899	0	0	1.84476	22.848	6.3538	38.9385	8.30715	27.5679	1.42222	29.1043	32.9149	7.85986	lncRNA
ENSG00000196123	KIAA0895L	22.2223	2.20708	0.411681	5.36115	8.26949e-08	1.32709e-06	6.54425	5.56137	9.78633	8.18968	5.69775	9.38697	15.0142	10.1039	2.76714	85.6798	22.2383	16.2999	44.6509	53.0938	7.11108	35.8953	38.4008	23.5796	protein_coding
ENSG00000183255	PTTG1IP	251.916	2.20347	0.300222	7.33948	2.14419e-13	9.53909e-12	80.7124	94.5433	106.76	62.4463	126.386	82.136	73.1943	90.9354	90.3931	115.056	442.383	316.036	826.561	756.587	365.51	294.923	368.236	241.691	protein_coding
ENSG00000173221	GLRX	31.3906	2.2034	0.46858	4.70228	2.5727e-06	2.87413e-05	2.18142	6.48827	14.2347	22.5216	26.4168	5.47573	3.75356	10.9459	7.37903	160.752	37.3286	54.3329	26.9982	33.6941	21.3332	65.9697	37.715	27.5095	protein_coding
ENSG00000075702	WDR62	7.83604	2.20329	0.568183	3.87779	0.000105408	0.000749422	4.36283	0.926896	3.55866	4.09484	0.517977	2.34674	11.2607	0	0.922379	15.504	10.3249	11.7721	5.19197	4.08414	19.911	9.70142	26.7434	9.82482	protein_coding
ENSG00000133739	LRRCC1	21.7935	2.20292	0.381251	5.77813	7.55358e-09	1.47877e-07	11.9978	2.78069	12.4553	6.14226	7.25168	10.1692	3.75356	6.73595	8.30141	37.5359	33.3574	47.0885	25.9598	53.0938	38.3998	64.9995	14.4003	7.85986	protein_coding
ENSG00000159147	DONSON	56.7425	2.20164	0.397281	5.54177	2.99428e-08	5.21123e-07	16.3606	28.7338	33.8073	17.4031	10.3595	19.5562	16.891	19.3659	20.2923	91.3918	295.452	124.966	40.4973	49.0097	93.8663	29.1043	51.4296	62.8789	protein_coding
ENSG00000072952	MRVI1	16.605	2.20092	0.640562	3.43592	0.000590543	0.00327675	4.36283	6.48827	4.44833	6.14226	10.8775	10.1692	0	1.68399	8.30141	48.9599	27.7979	93.2714	13.4991	6.12621	0	3.88057	25.3719	27.5095	protein_coding
ENSG00000075426	FOSL2	168.058	2.19741	0.711588	3.08803	0.00201487	0.00926247	94.8916	10.1959	32.9176	6.14226	15.5393	6.25798	274.01	29.4698	74.7127	4.89599	251.769	96.8936	456.893	122.524	1068.08	65.9697	217.376	196.496	protein_coding
ENSG00000131747	TOP2A	369.558	2.19447	0.441478	4.97072	6.67043e-07	8.6918e-06	315.215	51.9061	72.9526	83.9442	41.9561	119.684	339.697	118.721	52.5756	217.056	752.131	1457.93	230.523	362.467	381.154	669.398	732.358	652.368	protein_coding
ENSG00000261485	PAN3-AS1	12.4454	2.19357	0.422531	5.1915	2.0861e-07	3.0544e-06	4.36283	6.48827	7.11733	2.04742	0.517977	3.91124	5.63033	9.26193	1.84476	32.6399	23.8267	24.4498	26.9982	12.2524	19.911	19.4028	9.60019	13.7548	lncRNA
ENSG00000051128	HOMER3	14.8611	2.19209	0.681992	3.21425	0.00130786	0.0064713	1.09071	1.85379	4.44833	0	9.84157	0.782247	3.75356	10.9459	14.7581	26.1119	16.6787	14.4888	68.534	61.2621	4.26665	15.5223	1.37146	11.7898	protein_coding
ENSG00000100099	HPS4	286.637	2.1915	0.350148	6.25879	3.87982e-10	9.73972e-09	154.881	108.447	152.133	84.9679	72.5168	89.1762	129.498	69.8855	66.4113	557.327	395.524	191.071	1191.04	101.082	590.22	441.415	339.435	424.432	protein_coding
ENSG00000169016	E2F6	36.0738	2.1899	0.379816	5.76569	8.13249e-09	1.57791e-07	4.36283	18.5379	18.683	18.4268	17.0932	14.0805	3.75356	11.7879	8.30141	83.2318	65.9207	39.8441	121.492	16.3366	83.9108	44.6265	51.4296	27.5095	protein_coding
ENSG00000140939	NOL3	4.37294	2.18672	0.619397	3.5304	0.000414925	0.0024391	0	2.78069	0.889666	1.02371	1.03595	2.34674	0	1.68399	3.68952	7.34399	7.14802	11.7721	11.4223	7.14724	1.42222	3.88057	1.37146	13.7548	protein_coding
ENSG00000270696	AC005034.3	4.89324	2.18586	0.69993	3.12297	0.00179038	0.00841836	0	1.85379	1.77933	3.07113	5.69775	0	0	1.68399	0.922379	31.0079	6.3538	8.14993	4.15357	7.14724	1.42222	6.79099	4.11437	3.92993	lncRNA
ENSG00000276368	HIST1H2AJ	16.5675	2.1853	0.796025	2.74527	0.00604619	0.0231694	7.63496	0.926896	0	2.04742	2.07191	4.69348	0	2.52598	33.2056	9.79198	61.9495	11.7721	2.07679	5.10517	41.2443	5.82085	13.0288	94.3183	protein_coding
ENSG00000120896	SORBS3	42.7241	2.18389	0.276714	7.89224	2.96803e-15	1.77104e-13	10.9071	18.5379	11.5657	22.5216	19.6831	14.0805	13.1374	15.1559	12.9133	102	51.6246	110.477	64.3804	76.5776	31.2888	44.6265	92.5733	56.984	protein_coding
ENSG00000114346	ECT2	6.74776	2.18374	0.59045	3.69844	0.00021693	0.00140602	5.45354	0	1.77933	0	2.58989	3.91124	0	5.05196	2.76714	13.872	16.6787	19.922	1.03839	8.16828	7.11108	10.6716	18.5147	3.92993	protein_coding
ENSG00000179598	PLD6	17.6325	2.18133	0.521738	4.18089	2.90371e-05	0.000242304	2.18142	8.34206	8.89666	3.07113	10.3595	6.25798	7.50711	3.36798	7.37903	53.8559	4.76535	82.4048	33.2286	21.4417	4.26665	12.6118	35.6579	11.7898	protein_coding
ENSG00000132359	RAP1GAP2	55.9604	2.17935	0.373029	5.84231	5.14832e-09	1.03635e-07	6.54425	8.34206	18.683	54.2566	16.5753	20.3384	20.6446	23.5758	13.8357	143.616	80.2167	67.0105	126.684	112.314	18.4888	95.0739	94.6305	86.4584	protein_coding
ENSG00000168005	C11orf84	7.51953	2.17803	0.62693	3.47412	0.000512536	0.0029149	1.09071	1.85379	3.55866	5.11855	1.03595	3.12899	1.87678	3.36798	3.68952	48.9599	8.73647	11.7721	10.3839	1.02103	9.95551	0.970142	10.9716	7.85986	protein_coding
ENSG00000249859	PVT1	50.2186	2.17624	0.338111	6.43647	1.22282e-10	3.39881e-09	21.8142	25.9531	13.345	11.2608	17.0932	10.1692	37.5356	13.4719	16.6028	149.328	42.8881	68.8216	121.492	40.8414	96.7107	59.1787	122.06	35.3694	lncRNA
ENSG00000176208	ATAD5	63.9006	2.1755	0.373175	5.82969	5.55314e-09	1.11485e-07	31.6305	17.611	12.4553	17.4031	25.3809	36.7656	13.1374	31.1538	21.2147	38.3519	234.296	124.06	58.15	40.8414	147.911	64.0294	58.9726	176.847	protein_coding
ENSG00000163412	EIF4E3	6.37752	2.1746	0.655799	3.31596	0.000913298	0.00476188	4.36283	0	3.55866	0	4.14382	0	3.75356	3.36798	1.84476	7.34399	21.4441	10.8666	3.11518	20.4207	0	12.6118	6.17155	11.7898	protein_coding
ENSG00000163704	PRRT3	7.75884	2.17288	0.57179	3.80014	0.000144615	0.000987548	0	0.926896	5.338	1.02371	3.10786	1.56449	5.63033	0.841994	7.37903	17.952	3.1769	9.96102	3.11518	17.3576	17.0666	27.164	8.22874	9.82482	protein_coding
ENSG00000146410	MTFR2	5.19428	2.1727	0.747057	2.90835	0.00363347	0.0153387	1.09071	1.85379	2.669	3.07113	1.03595	0	5.63033	2.52598	0	4.07999	14.296	3.62219	0	6.12621	32.711	1.94028	8.91446	3.92993	protein_coding
ENSG00000134072	CAMK1	23.3871	2.17262	0.69355	3.13261	0.00173261	0.00819026	8.72566	4.63448	6.22766	3.07113	17.0932	2.34674	9.38389	18.5239	6.45665	5.71199	20.6498	67.0105	15.5759	56.1569	0	66.9398	112.459	0	protein_coding
ENSG00000106211	HSPB1	646.557	2.17021	0.377134	5.75448	8.69097e-09	1.67761e-07	186.511	254.896	116.546	138.201	222.73	102.474	555.526	271.964	269.335	1295.81	451.12	831.293	1025.93	627.936	1575.82	1207.83	250.291	2253.81	protein_coding
ENSG00000012048	BRCA1	34.5755	2.16938	0.34414	6.30378	2.90478e-10	7.47931e-09	16.3606	11.1227	16.014	13.3082	14.5034	17.2094	7.50711	6.73595	10.1462	78.3358	32.5632	137.643	43.6125	51.0517	28.4443	50.4474	63.7727	23.5796	protein_coding
ENSG00000111145	ELK3	92.4234	2.16794	0.404309	5.36207	8.22717e-08	1.32171e-06	46.9004	26.88	39.1453	30.7113	18.6472	50.0638	16.891	25.2598	47.0413	222.768	190.614	230.915	85.1482	57.1779	79.6441	44.6265	56.2297	394.958	protein_coding
ENSG00000166452	AKIP1	41.8453	2.16144	0.343547	6.29154	3.14324e-10	8.02781e-09	15.2699	10.1959	10.676	20.4742	23.309	14.0805	13.1374	13.4719	16.6028	72.6239	47.6535	105.044	18.6911	100.061	27.0221	125.148	70.63	49.1241	protein_coding
ENSG00000104974	LILRA1	5.54547	2.15959	0.727987	2.96653	0.00301183	0.0130723	2.18142	1.85379	0.889666	2.04742	6.7337	0	1.87678	0.841994	0.922379	4.89599	0	1.8111	11.4223	10.2103	8.5333	2.91043	17.1432	25.5445	protein_coding
ENSG00000114993	RTKN	12.7672	2.15741	0.524056	4.11676	3.84232e-05	0.000310629	1.09071	6.48827	4.44833	4.09484	9.84157	3.12899	3.75356	5.89396	2.76714	56.3039	1.58845	15.3943	16.6143	24.5048	8.5333	30.0744	27.4291	7.85986	protein_coding
ENSG00000130958	SLC35D2	8.22627	2.15554	0.546588	3.94364	8.02546e-05	0.00059477	3.27212	0	5.338	4.09484	5.17977	2.34674	0	4.20997	1.84476	15.504	7.14802	2.71664	18.6911	14.2945	2.84443	28.1341	22.629	9.82482	protein_coding
ENSG00000180509	KCNE1	6.72201	2.1547	0.679317	3.17186	0.00151464	0.00730455	5.45354	0.926896	1.77933	0	4.14382	0	3.75356	1.68399	4.6119	12.24	9.5307	8.14993	33.2286	5.10517	0	12.6118	2.05718	15.7197	protein_coding
ENSG00000241990	PRR34-AS1	7.88281	2.15203	0.442618	4.86204	1.1618e-06	1.43904e-05	3.27212	0.926896	5.338	5.11855	3.10786	2.34674	0	4.20997	0.922379	9.79198	24.621	15.3943	10.3839	9.18931	7.11108	15.5223	8.91446	15.7197	lncRNA
ENSG00000167992	VWCE	20.1319	2.15167	0.427773	5.02994	4.90634e-07	6.59898e-06	2.18142	7.41516	8.007	4.09484	11.9135	6.25798	15.0142	6.73595	5.53427	30.1919	43.6824	43.4663	6.23036	9.18931	32.711	20.373	58.2869	51.0891	protein_coding
ENSG00000112312	GMNN	20.5777	2.15097	0.385298	5.58262	2.36926e-08	4.21419e-07	16.3606	12.0496	7.11733	5.11855	4.66179	3.91124	5.63033	8.41994	5.53427	31.8239	79.4225	35.3164	16.6143	18.3786	32.711	15.5223	38.4008	33.4044	protein_coding
ENSG00000187951	AC091057.1	11.6848	2.15091	0.406426	5.29224	1.20828e-07	1.87696e-06	10.9071	0.926896	3.55866	8.18968	2.07191	5.47573	3.75356	2.52598	1.84476	22.032	14.296	22.6387	14.5375	20.4207	29.8665	10.6716	13.0288	23.5796	lncRNA
ENSG00000198060	MARCH5	57.5906	2.1496	0.352298	6.10165	1.04978e-09	2.41e-08	18.542	19.4648	24.021	39.9247	22.791	23.4674	9.38389	18.5239	12.9133	130.56	143.755	86.9326	49.8429	35.7362	197.688	40.746	56.2297	106.108	protein_coding
ENSG00000115977	AAK1	232.699	2.14515	0.36148	5.93434	2.95026e-09	6.19597e-08	133.066	69.5172	76.5113	70.636	84.9483	72.749	75.0711	101.039	89.4708	88.9438	311.336	357.691	350.977	289.974	182.044	368.654	1243.91	222.041	protein_coding
ENSG00000135900	MRPL44	17.5551	2.14332	0.379292	5.65084	1.59667e-08	2.95315e-07	4.36283	8.34206	8.89666	8.18968	7.76966	5.47573	3.75356	7.57795	2.76714	47.3279	31.769	23.5442	13.4991	12.2524	62.5775	18.4327	21.9433	27.5095	protein_coding
ENSG00000186472	PCLO	20.2792	2.14272	0.768605	2.78781	0.00530657	0.0208997	22.9049	2.78069	5.338	5.11855	3.10786	6.25798	1.87678	11.7879	8.30141	76.7038	28.5921	9.96102	0	69.4304	9.95551	97.0142	0	5.89489	protein_coding
ENSG00000156011	PSD3	62.1311	2.14095	0.321834	6.65234	2.88469e-11	8.7986e-10	16.3606	16.6841	27.5797	28.6639	25.8989	25.8142	35.6588	20.2079	11.0685	106.08	88.1589	122.249	73.7259	46.9676	48.3554	55.2981	208.461	161.127	protein_coding
ENSG00000135821	GLUL	109.166	2.13492	0.231294	9.23032	2.69828e-20	3.65532e-18	34.9027	32.4413	51.6006	36.8536	45.582	31.2899	45.0427	34.5218	52.5756	170.544	127.87	105.949	221.178	177.66	143.644	344.4	155.66	153.267	protein_coding
ENSG00000066923	STAG3	74.1471	2.13048	0.687858	3.09727	0.00195314	0.00903951	15.2699	30.5876	75.6216	25.5928	15.0213	8.60472	24.3981	3.36798	49.8085	1992.67	74.6571	130.399	606.422	18.3786	45.5109	124.178	0.685728	41.2643	protein_coding
ENSG00000102755	FLT1	57.7084	2.12718	0.793879	2.67947	0.0073738	0.0272164	37.0841	32.4413	32.9176	19.4505	14.5034	13.2982	11.2607	10.1039	22.1371	155.856	79.4225	1.8111	12.4607	2.04207	560.353	14.5521	1.37146	17.6847	protein_coding
ENSG00000167460	TPM4	726.811	2.12685	0.377746	5.63038	1.79818e-08	3.27748e-07	416.651	181.672	183.271	230.335	205.637	180.699	350.957	271.122	417.838	1099.97	1195.31	648.372	1738.27	597.305	3704.87	650.965	351.093	658.263	protein_coding
ENSG00000170835	CEL	2.75665	2.12387	0.744209	2.85386	0.00431915	0.0176902	3.27212	1.85379	0.889666	0	1.55393	0.782247	0	0.841994	0	6.52799	2.38267	3.62219	3.11518	7.14724	5.68887	0.970142	10.9716	0	protein_coding
ENSG00000250132	AC004803.1	2.41452	2.12373	0.783635	2.7101	0.00672635	0.0252511	1.09071	0.926896	0.889666	2.04742	2.58989	0	0	0	0	8.15998	1.58845	2.71664	5.19197	1.02103	8.5333	1.94028	4.8001	1.96496	lncRNA
ENSG00000140682	TGFB1I1	18.579	2.12306	0.718991	2.95284	0.00314868	0.0136015	18.542	1.85379	0.889666	2.04742	10.3595	1.56449	13.1374	9.26193	5.53427	4.89599	2.38267	20.8276	9.34554	7.14724	4.26665	24.2536	152.917	45.1942	protein_coding
ENSG00000126243	LRFN3	3.38811	2.12052	0.867642	2.444	0.0145255	0.0471953	2.18142	0	0.889666	0	3.10786	0.782247	1.87678	1.68399	0.922379	13.056	0	14.4888	2.07679	1.02103	0	1.94028	13.0288	3.92993	protein_coding
ENSG00000172830	SSH3	10.4946	2.11756	0.564105	3.75385	0.000174138	0.00116275	3.27212	3.70758	1.77933	2.04742	6.21573	5.47573	9.38389	2.52598	1.84476	41.6159	7.94225	48.8996	7.26875	12.2524	1.42222	10.6716	6.85728	15.7197	protein_coding
ENSG00000092964	DPYSL2	132.329	2.11755	0.383948	5.5152	3.48393e-08	5.93967e-07	39.2655	59.3213	63.1663	24.569	66.3011	40.6769	73.1943	32.8378	47.9637	210.528	123.899	306.075	164.066	394.119	18.4888	227.983	369.607	119.863	protein_coding
ENSG00000144283	PKP4	24.0089	2.1158	0.438344	4.8268	1.38742e-06	1.67706e-05	20.7235	7.41516	4.44833	7.16597	8.80561	10.1692	11.2607	6.73595	5.53427	38.3519	16.6787	61.5772	24.9214	34.7152	5.68887	89.2531	61.0298	17.6847	protein_coding
ENSG00000183060	LYSMD4	7.829	2.1129	0.568576	3.71612	0.000202302	0.00132377	1.09071	2.78069	3.55866	5.11855	4.14382	1.56449	0	5.05196	1.84476	3.26399	26.2094	10.8666	5.19197	6.12621	15.6444	1.94028	15.086	31.4394	protein_coding
ENSG00000167173	C15orf39	69.5575	2.11106	0.381239	5.53737	3.07047e-08	5.31921e-07	18.542	20.3917	27.5797	14.3319	36.2584	21.9029	52.5498	13.4719	32.2833	16.32	145.343	83.3104	131.876	161.323	132.266	64.0294	217.376	62.8789	protein_coding
ENSG00000139531	SUOX	7.10724	2.11026	0.554937	3.8027	0.000143128	0.000979173	1.09071	2.78069	5.338	3.07113	3.10786	1.56449	1.87678	2.52598	2.76714	19.584	6.3538	18.111	11.4223	19.3997	1.42222	21.3431	6.17155	0	protein_coding
ENSG00000124496	TRERF1	13.1322	2.1102	0.523466	4.03121	5.54913e-05	0.000429466	15.2699	0	7.11733	2.04742	0.517977	3.12899	5.63033	2.52598	9.22379	9.79198	9.5307	23.5442	37.3822	34.7152	14.2222	15.5223	22.629	23.5796	protein_coding
ENSG00000165672	PRDX3	17.7135	2.10974	0.48748	4.32784	1.50576e-05	0.000136749	8.72566	4.63448	6.22766	9.21339	15.0213	7.04023	0	6.73595	0.922379	66.9119	11.9134	46.1829	9.34554	30.631	8.5333	34.9251	32.2292	19.6496	protein_coding
ENSG00000198720	ANKRD13B	9.70143	2.10689	0.491508	4.28658	1.81446e-05	0.000161063	4.36283	5.56137	1.77933	1.02371	3.62584	9.38697	0	5.05196	0.922379	20.4	6.3538	18.111	18.6911	22.4628	9.95551	3.88057	25.3719	17.6847	protein_coding
ENSG00000008405	CRY1	26.8132	2.10674	0.541374	3.89147	9.96377e-05	0.000714537	8.72566	5.56137	9.78633	10.2371	6.21573	4.69348	31.9052	6.73595	9.22379	49.7759	59.5669	30.7886	16.6143	9.18931	162.133	5.82085	14.4003	41.2643	protein_coding
ENSG00000049860	HEXB	63.2115	2.10662	0.394436	5.34085	9.25119e-08	1.47519e-06	22.9049	10.1959	23.1313	39.9247	32.6326	17.2094	7.50711	26.9438	32.2833	158.304	120.722	122.249	25.9598	89.8511	246.043	48.5071	46.6295	66.8088	protein_coding
ENSG00000249087	ZNF436-AS1	3.29527	2.10614	0.708441	2.97293	0.00294973	0.0128528	1.09071	0.926896	2.669	0	2.58989	1.56449	0	1.68399	0	12.24	7.14802	7.24438	1.03839	1.02103	5.68887	9.70142	2.74291	1.96496	lncRNA
ENSG00000196465	MYL6B	87.6391	2.10465	0.260005	8.09465	5.74293e-16	3.97956e-14	26.177	17.611	25.8003	56.3041	32.6326	26.5964	33.782	31.1538	47.9637	157.488	243.033	112.288	92.417	100.061	213.332	122.238	106.974	131.653	protein_coding
ENSG00000135605	TEC	15.4119	2.10411	0.627272	3.35439	0.000795399	0.0042263	13.0885	3.70758	5.338	4.09484	4.14382	4.69348	5.63033	3.36798	8.30141	0	31.769	11.7721	80.9947	5.10517	48.3554	6.79099	6.85728	33.4044	protein_coding
ENSG00000079999	KEAP1	27.1831	2.10002	0.330228	6.35931	2.02659e-10	5.43205e-09	6.54425	9.26896	12.4553	5.11855	14.5034	16.4272	5.63033	8.41994	12.9133	76.7038	27.7979	49.8051	36.3438	54.1148	25.5999	54.328	57.6012	15.7197	protein_coding
ENSG00000013810	TACC3	167.009	2.09956	0.241584	8.69079	3.59924e-18	3.34085e-16	77.4403	48.1986	58.718	67.5649	76.6606	38.3301	48.7962	79.9894	71.9456	401.471	409.82	379.424	215.986	179.702	234.666	193.058	145.374	279.025	protein_coding
ENSG00000167670	CHAF1A	61.6291	2.09874	0.330838	6.34371	2.24292e-10	5.93782e-09	20.7235	8.34206	16.9037	20.4742	13.9854	22.6852	50.673	17.6819	42.4294	106.896	194.585	124.06	73.7259	79.6407	122.311	47.537	72.0014	74.6687	protein_coding
ENSG00000270069	MIR222HG	36.1348	2.09758	0.429304	4.886	1.02905e-06	1.28307e-05	16.3606	12.9765	3.55866	13.3082	7.76966	7.82247	31.9052	21.0499	10.1462	11.424	54.8015	57.955	30.1134	63.3041	42.6665	69.8502	34.2864	161.127	lncRNA
ENSG00000072110	ACTN1	164.898	2.09669	0.511001	4.10311	4.07635e-05	0.000327087	99.2544	9.26896	40.9246	18.4268	97.8977	37.5479	54.4266	100.197	104.229	57.1199	81.0109	317.847	367.591	276.7	25.5999	621.861	438.18	220.076	protein_coding
ENSG00000134057	CCNB1	12.6492	2.09637	0.500283	4.19037	2.78503e-05	0.000233827	4.36283	4.63448	7.11733	4.09484	2.58989	1.56449	5.63033	7.57795	6.45665	46.5119	8.73647	37.1275	2.07679	21.4417	18.4888	21.3431	24.0005	3.92993	protein_coding
ENSG00000204428	NA_11	9.40143	2.09525	0.642255	3.26233	0.001105	0.00561729	1.09071	4.63448	5.338	0	9.84157	0.782247	5.63033	3.36798	0.922379	2.448	7.14802	54.3329	14.5375	15.3155	4.26665	7.76114	8.22874	23.5796	protein_coding
ENSG00000117480	FAAH	22.7218	2.09468	0.495108	4.23075	2.32914e-05	0.000200247	11.9978	9.26896	8.89666	3.07113	11.3955	6.25798	16.891	8.41994	2.76714	86.4958	5.55957	58.8606	46.7277	39.8204	7.11108	49.4772	28.1148	7.85986	protein_coding
ENSG00000182557	SPNS3	6.27968	2.09222	0.857005	2.44132	0.0146338	0.0474857	0	0	0	1.02371	3.10786	1.56449	5.63033	5.89396	4.6119	4.89599	3.1769	0.905548	7.26875	49.0097	7.11108	17.4626	1.37146	0	protein_coding
ENSG00000126016	AMOT	21.9449	2.08947	0.54046	3.86609	0.000110593	0.00078038	2.18142	13.9034	7.11733	2.04742	8.28763	10.1692	7.50711	3.36798	20.2923	52.2239	45.2708	55.2384	4.15357	18.3786	86.7552	40.746	7.54301	9.82482	protein_coding
ENSG00000075234	TTC38	15.4025	2.08868	0.508635	4.10643	4.01821e-05	0.000323284	2.18142	4.63448	8.007	0	3.62584	0.782247	13.1374	12.6299	9.22379	7.34399	25.4152	28.9775	17.6527	54.1148	14.2222	18.4327	41.1437	15.7197	protein_coding
ENSG00000134352	IL6ST	95.0068	2.08792	0.418517	4.98885	6.07406e-07	8.01893e-06	68.7146	21.3186	33.8073	28.6639	45.582	10.9515	61.9337	26.9438	29.5161	130.56	90.5416	29.8831	256.483	47.9886	182.044	129.029	380.579	135.583	protein_coding
ENSG00000133958	UNC79	6.39643	2.08651	0.777446	2.6838	0.00727907	0.0269794	4.36283	3.70758	0.889666	2.04742	0.517977	0.782247	7.50711	0.841994	2.76714	16.32	34.9459	22.6387	4.15357	3.0631	8.5333	0	2.05718	0	protein_coding
ENSG00000074855	ANO8	99.1938	2.08247	0.406591	5.12178	3.02669e-07	4.25349e-06	26.177	29.6607	26.69	67.5649	46.1	21.1207	13.1374	73.2535	35.9728	314.159	71.4802	236.348	175.488	158.26	17.0666	156.193	112.459	204.356	protein_coding
ENSG00000027075	PRKCH	56.6149	2.08193	0.465717	4.47038	7.80823e-06	7.77051e-05	47.9912	11.1227	16.014	5.11855	19.6831	3.91124	54.4266	25.2598	13.8357	127.296	67.5091	76.9715	158.874	75.5566	25.5999	159.103	24.6862	106.108	protein_coding
ENSG00000107566	ERLIN1	17.4879	2.08005	0.431182	4.82407	1.40658e-06	1.69614e-05	8.72566	1.85379	8.007	9.21339	6.7337	4.69348	3.75356	5.05196	11.9909	38.3519	28.5921	25.3553	14.5375	44.9255	21.3332	59.1787	4.8001	17.6847	protein_coding
ENSG00000065675	PRKCQ	19.4616	2.07897	0.479151	4.33886	1.43221e-05	0.000131078	15.2699	2.78069	8.89666	5.11855	9.32359	2.34674	13.1374	5.89396	5.53427	53.0399	18.2672	27.1664	47.7661	46.9676	7.11108	57.2384	4.8001	19.6496	protein_coding
ENSG00000176170	SPHK1	5.03536	2.07361	0.718624	2.88553	0.00390757	0.0163036	4.36283	0	0.889666	0	0.517977	0.782247	9.38389	2.52598	0.922379	8.15998	2.38267	9.05548	20.7679	12.2524	244.621	5.82085	0.685728	7.85986	protein_coding
ENSG00000181444	ZNF467	22.1387	2.07245	0.465307	4.45393	8.43127e-06	8.31935e-05	10.9071	3.70758	5.338	4.09484	9.32359	4.69348	5.63033	17.6819	14.7581	48.1439	9.5307	54.3329	28.0366	77.5986	5.68887	50.4474	17.1432	31.4394	protein_coding
ENSG00000181938	GINS3	14.2179	2.07184	0.467705	4.4298	9.43192e-06	9.16792e-05	9.81637	2.78069	4.44833	3.07113	3.62584	9.38697	5.63033	9.26193	1.84476	49.7759	19.8556	38.033	8.30715	9.18931	8.5333	17.4626	41.1437	13.7548	protein_coding
ENSG00000113552	GNPDA1	25.6049	2.06862	0.824522	2.50887	0.0121118	0.040671	6.54425	8.34206	12.4553	2.04742	21.2371	2.34674	11.2607	4.20997	20.2923	164.016	2.38267	11.7721	3.11518	72.4935	0	106.716	11.6574	0	protein_coding
ENSG00000143079	CTTNBP2NL	16.9199	2.06855	0.61631	3.35634	0.000789814	0.00420256	11.9978	0.926896	1.77933	6.14226	4.66179	13.2982	16.891	4.20997	0	16.32	12.7076	8.14993	23.883	5.10517	7.11108	70.8204	51.4296	49.1241	protein_coding
ENSG00000186074	CD300LF	33.0727	2.06767	0.660678	3.12961	0.00175037	0.00825345	10.9071	5.56137	12.4553	3.07113	21.755	7.04023	7.50711	22.7338	23.0595	18.768	18.2672	22.6387	142.26	174.597	0	79.5517	5.48582	19.6496	protein_coding
ENSG00000136159	NUDT15	7.3765	2.06709	0.482254	4.2863	1.81676e-05	0.000161095	3.27212	4.63448	4.44833	3.07113	2.58989	0	0	2.52598	4.6119	13.872	24.621	12.6777	6.23036	7.14724	19.911	7.76114	7.54301	7.85986	protein_coding
ENSG00000102878	HSF4	3.07429	2.06643	0.685061	3.01641	0.00255787	0.0113627	0	0.926896	3.55866	1.02371	0.517977	0.782247	3.75356	0.841994	0	4.07999	1.58845	7.24438	10.3839	4.08414	5.68887	2.91043	2.05718	5.89489	protein_coding
ENSG00000141458	NPC1	22.8672	2.06583	0.379659	5.44128	5.28989e-08	8.77002e-07	7.63496	9.26896	8.89666	11.2608	9.84157	10.9515	5.63033	9.26193	4.6119	26.9279	41.2997	9.96102	28.0366	27.5679	76.7997	20.373	24.6862	78.5986	protein_coding
ENSG00000198876	DCAF12	20.7544	2.0629	0.648417	3.18145	0.00146542	0.00710749	9.81637	0	24.021	8.18968	12.4315	3.91124	0	6.73595	6.45665	128.112	9.5307	37.1275	33.2286	19.3997	9.95551	50.4474	10.2859	3.92993	protein_coding
ENSG00000119673	ACOT2	8.00988	2.06263	0.615285	3.35231	0.000801401	0.00425518	0	2.78069	9.78633	3.07113	2.07191	0	1.87678	3.36798	4.6119	18.768	20.6498	22.6387	3.11518	2.04207	5.68887	5.82085	12.3431	25.5445	protein_coding
ENSG00000213967	ZNF726	6.45984	2.06204	0.551829	3.73673	0.000186427	0.00123276	2.18142	0	4.44833	6.14226	0.517977	1.56449	1.87678	2.52598	3.68952	17.136	22.2383	5.43329	8.30715	3.0631	15.6444	6.79099	6.85728	7.85986	protein_coding
ENSG00000136940	PDCL	14.571	2.06092	0.426309	4.83435	1.33584e-06	1.62254e-05	5.45354	2.78069	6.22766	3.07113	10.3595	8.60472	0	5.05196	6.45665	45.6959	8.73647	22.6387	28.0366	17.3576	17.0666	14.5521	13.0288	47.1591	protein_coding
ENSG00000272476	AL024507.2	6.20661	2.06037	0.733605	2.80856	0.0049764	0.019812	4.36283	3.70758	0	1.02371	0.517977	2.34674	3.75356	5.05196	0.922379	0	4.76535	18.111	4.15357	6.12621	31.2888	3.88057	2.05718	19.6496	lncRNA
ENSG00000123146	ADGRE5	365.446	2.05893	0.33891	6.07517	1.23858e-09	2.79228e-08	109.071	96.3971	137.009	120.798	123.797	82.9182	251.488	169.241	184.476	257.039	355.813	191.071	882.634	458.445	304.354	734.398	1085.51	1033.57	protein_coding
ENSG00000104490	NCALD	7.13589	2.058	0.728531	2.82487	0.00473	0.0190174	1.09071	2.78069	9.78633	0	4.14382	1.56449	3.75356	1.68399	0	8.97598	4.76535	2.71664	4.15357	54.1148	15.6444	5.82085	5.48582	1.96496	protein_coding
ENSG00000151208	DLG5	11.5705	2.05694	0.819388	2.51034	0.0120615	0.0405384	3.27212	0.926896	0.889666	0	1.03595	0.782247	35.6588	0	0.922379	18.768	11.1191	7.24438	6.23036	3.0631	49.7776	10.6716	20.5718	37.3343	protein_coding
ENSG00000135046	ANXA1	101.507	2.05413	0.659297	3.11563	0.0018355	0.00857459	41.4469	29.6607	34.697	14.3319	74.0707	14.8627	35.6588	59.7816	49.8085	26.9279	34.1517	13.5832	24.9214	753.524	9.95551	404.549	150.174	55.019	protein_coding
ENSG00000182628	SKA2	76.5719	2.05202	0.282719	7.25816	3.92395e-13	1.65743e-11	15.2699	34.2951	28.4693	30.7113	38.8483	36.7656	15.0142	31.1538	35.0504	215.424	151.697	196.504	62.3036	106.188	59.7331	108.656	102.173	110.038	protein_coding
ENSG00000128944	KNSTRN	12.0678	2.04835	0.468377	4.37329	1.22388e-05	0.000115238	7.63496	7.41516	8.007	6.14226	5.17977	4.69348	1.87678	0.841994	0	38.3519	4.76535	23.5442	21.8063	11.2314	18.4888	23.2834	12.3431	21.6146	protein_coding
ENSG00000130164	LDLR	31.2134	2.04825	0.59816	3.42425	0.000616506	0.00339575	14.1792	12.9765	9.78633	2.04742	5.17977	5.47573	26.2749	10.9459	23.9819	18.768	7.94225	8.14993	222.216	42.8835	12.7999	34.9251	83.6588	19.6496	protein_coding
ENSG00000164535	DAGLB	187.91	2.04781	0.272585	7.51255	5.79848e-14	2.84012e-12	68.7146	74.1516	90.7459	52.2092	61.6393	53.9751	125.744	53.8876	81.1694	412.079	451.914	359.502	307.364	115.377	180.621	165.894	314.749	412.643	protein_coding
ENSG00000137310	TCF19	26.7099	2.04707	0.388177	5.27355	1.33808e-07	2.05104e-06	7.63496	12.0496	5.338	22.5216	7.25168	10.1692	15.0142	11.7879	3.68952	70.9919	31.769	81.4993	11.4223	49.0097	31.2888	34.9251	52.8011	21.6146	protein_coding
ENSG00000273314	AC005229.4	6.24295	2.04707	0.521971	3.92181	8.78879e-05	0.000641851	3.27212	5.56137	0	2.04742	4.14382	1.56449	1.87678	1.68399	0.922379	8.15998	5.55957	4.52774	7.26875	16.3366	22.7555	8.73128	6.17155	11.7898	lncRNA
ENSG00000186314	PRELID2	7.79742	2.04465	0.725302	2.81903	0.00481694	0.0192793	5.45354	0.926896	8.007	4.09484	3.62584	2.34674	0	0.841994	1.84476	4.89599	14.296	21.7331	41.5357	11.2314	0	17.4626	2.05718	0	protein_coding
ENSG00000139880	CDH24	3.26356	2.04401	0.80058	2.55316	0.0106749	0.0367973	1.09071	0.926896	0.889666	1.02371	2.07191	2.34674	0	2.52598	0	0.815998	15.8845	2.71664	7.26875	1.02103	1.42222	0	8.91446	9.82482	protein_coding
ENSG00000081026	MAGI3	6.16043	2.0424	0.771452	2.64748	0.00810938	0.0293798	4.36283	0	1.77933	6.14226	3.10786	1.56449	3.75356	0	0.922379	8.97598	3.1769	26.2609	5.19197	1.02103	4.26665	0.970142	2.05718	37.3343	protein_coding
ENSG00000037042	TUBG2	9.00219	2.03499	0.70687	2.87888	0.00399093	0.0165715	5.45354	3.70758	1.77933	1.02371	5.17977	2.34674	0	1.68399	10.1462	22.032	0.794225	37.1275	7.26875	29.61	0	23.2834	2.74291	7.85986	protein_coding
ENSG00000204314	PRRT1	3.04444	2.03149	0.764274	2.65807	0.00785898	0.0286765	1.09071	0.926896	0.889666	0	1.55393	0	1.87678	0	4.6119	6.52799	0.794225	8.14993	5.19197	4.08414	2.84443	11.6417	0.685728	3.92993	protein_coding
ENSG00000070018	LRP6	8.97335	2.03149	0.58887	3.44981	0.000560991	0.00314293	6.54425	1.85379	1.77933	7.16597	3.10786	3.91124	3.75356	1.68399	1.84476	14.688	15.0903	8.14993	11.4223	4.08414	41.2443	13.582	0	21.6146	protein_coding
ENSG00000188486	H2AFX	19.6576	2.03136	0.453222	4.48205	7.39296e-06	7.40626e-05	8.72566	4.63448	8.007	11.2608	6.21573	1.56449	0	13.4719	14.7581	66.9119	25.4152	29.8831	15.5759	14.2945	69.6886	20.373	25.3719	17.6847	protein_coding
ENSG00000011143	MKS1	9.50228	2.03043	0.543466	3.73608	0.000186908	0.0012354	1.09071	1.85379	10.676	8.18968	4.14382	0	0	2.52598	4.6119	29.3759	4.76535	18.111	14.5375	19.3997	7.11108	25.2237	9.60019	9.82482	protein_coding
ENSG00000151553	FAM160B1	37.2504	2.02987	0.298213	6.80678	9.98085e-12	3.2769e-10	15.2699	7.41516	11.5657	16.3794	18.1292	21.9029	13.1374	21.0499	5.53427	61.1999	102.455	53.4273	50.8813	34.7152	52.622	51.4175	39.0865	94.3183	protein_coding
ENSG00000178537	SLC25A20	15.631	2.02937	0.39466	5.14207	2.71727e-07	3.85104e-06	3.27212	3.70758	8.007	8.18968	8.28763	4.69348	3.75356	7.57795	7.37903	55.4879	9.5307	22.6387	16.6143	43.9045	15.6444	26.1938	24.6862	11.7898	protein_coding
ENSG00000166947	EPB42	18.8375	2.02911	0.681234	2.97858	0.00289591	0.012661	15.2699	6.48827	18.683	9.21339	5.69775	1.56449	1.87678	3.36798	4.6119	106.08	9.5307	45.2774	5.19197	3.0631	22.7555	73.7308	2.74291	3.92993	protein_coding
ENSG00000206560	ANKRD28	155.05	2.02905	0.391191	5.18686	2.13872e-07	3.1284e-06	66.5332	43.5641	52.4903	96.2287	48.1719	55.5396	106.976	42.9417	38.7399	44.8799	150.903	155.754	129.799	299.163	98.1329	576.264	397.722	387.098	protein_coding
ENSG00000185480	PARPBP	11.6633	2.02855	0.344766	5.88384	4.00864e-09	8.22345e-08	3.27212	8.34206	4.44833	5.11855	2.58989	6.25798	1.87678	7.57795	1.84476	22.848	21.4441	19.0165	16.6143	15.3155	18.4888	20.373	24.6862	9.82482	protein_coding
ENSG00000106665	CLIP2	134.812	2.02616	0.424829	4.76934	1.84831e-06	2.1612e-05	49.0819	54.6868	36.4763	18.4268	58.0134	39.8946	135.128	43.7837	46.119	86.4958	152.491	137.643	296.98	396.161	36.9776	211.491	524.582	102.178	protein_coding
ENSG00000155363	MOV10	102.382	2.02433	0.327352	6.18394	6.25216e-10	1.50663e-08	30.5398	49.1255	21.352	39.9247	51.7977	41.4591	88.2086	24.4178	20.2923	263.567	96.8954	114.099	114.223	315.5	177.777	172.685	152.232	68.7738	protein_coding
ENSG00000110852	CLEC2B	141.597	2.02346	0.518489	3.90261	9.51599e-05	0.000687612	67.6239	31.5144	74.732	61.4226	56.9775	46.1526	48.7962	79.9894	35.0504	59.5679	227.943	42.5607	63.342	78.6197	1115.02	128.059	72.0014	259.375	protein_coding
ENSG00000170190	SLC16A5	2.50872	2.02202	0.811679	2.49116	0.0127327	0.0423075	3.27212	0.926896	0	0	1.55393	0.782247	1.87678	0	0.922379	4.89599	0.794225	3.62219	3.11518	5.10517	0	13.582	2.74291	1.96496	protein_coding
ENSG00000004487	KDM1A	41.1523	2.02188	0.492122	4.10848	3.98264e-05	0.000320594	30.5398	6.48827	17.7933	15.3557	8.28763	17.9917	15.0142	12.6299	22.1371	26.1119	49.2419	34.4108	136.03	8.16828	221.866	24.2536	31.5435	62.8789	protein_coding
ENSG00000188483	IER5L	8.08183	2.02028	0.686786	2.94165	0.00326472	0.0140182	0	1.85379	0.889666	1.02371	1.55393	1.56449	11.2607	5.89396	5.53427	5.71199	2.38267	6.33883	22.8447	4.08414	31.2888	5.82085	2.05718	35.3694	protein_coding
ENSG00000065154	OAT	7.15546	2.01688	0.48868	4.1272	3.67201e-05	0.000298705	1.09071	1.85379	1.77933	5.11855	3.62584	4.69348	3.75356	0	3.68952	19.584	5.55957	9.05548	18.6911	7.14724	11.3777	18.4327	5.48582	7.85986	protein_coding
ENSG00000107819	SFXN3	51.2438	2.01398	0.391348	5.14627	2.6572e-07	3.78016e-06	29.4491	21.3186	16.9037	12.2845	26.9348	12.516	28.1517	21.0499	15.6804	36.7199	49.2419	46.1829	72.6875	153.155	22.7555	76.6412	227.662	53.054	protein_coding
ENSG00000143630	HCN3	1.99486	2.01395	0.797447	2.52549	0.0115536	0.0391464	0	0	0	2.04742	0	2.34674	0	0.841994	1.84476	5.71199	0.794225	3.62219	3.11518	3.0631	2.84443	2.91043	4.8001	1.96496	protein_coding
ENSG00000163694	RBM47	11.8534	2.01235	0.584961	3.44014	0.000581413	0.00323325	2.18142	1.85379	3.55866	7.16597	6.21573	1.56449	5.63033	4.20997	10.1462	4.07999	34.9459	28.9775	1.03839	25.5259	1.42222	36.8654	14.4003	23.5796	protein_coding
ENSG00000129757	CDKN1C	15.6973	2.01045	0.631585	3.18317	0.0014567	0.00707737	13.0885	10.1959	2.669	2.04742	8.80561	3.12899	3.75356	9.26193	2.76714	10.608	28.5921	8.14993	52.9581	2.04207	98.1329	10.6716	13.7146	1.96496	protein_coding
ENSG00000137338	PGBD1	8.34901	2.00633	0.414184	4.84406	1.27211e-06	1.56026e-05	7.63496	2.78069	1.77933	2.04742	4.14382	3.12899	1.87678	0.841994	5.53427	22.848	14.296	9.05548	17.6527	11.2314	12.7999	12.6118	8.22874	11.7898	protein_coding
ENSG00000259330	INAFM2	17.4766	2.0041	0.446594	4.48751	7.20612e-06	7.23837e-05	6.54425	6.48827	8.007	12.2845	6.7337	3.12899	7.50711	3.36798	8.30141	11.424	32.5632	28.9775	49.8429	9.18931	32.711	16.4924	6.17155	64.8438	protein_coding
ENSG00000182621	PLCB1	30.3742	1.99777	0.610025	3.2749	0.001057	0.00541353	19.6327	36.1489	11.5657	2.04742	9.84157	0.782247	15.0142	5.89396	9.22379	8.15998	30.9748	6.33883	128.761	63.3041	25.5999	97.0142	68.5728	7.85986	protein_coding
ENSG00000129295	LRRC6	3.69725	1.99292	0.701615	2.84048	0.00450454	0.0182968	0	0.926896	0	5.11855	1.55393	2.34674	0	0.841994	1.84476	1.632	0.794225	3.62219	4.15357	8.16828	17.0666	5.82085	4.8001	7.85986	protein_coding
ENSG00000076067	RBMS2	11.4276	1.99255	0.507667	3.9249	8.67643e-05	0.000634878	2.18142	6.48827	6.22766	6.14226	6.7337	2.34674	9.38389	2.52598	0	20.4	17.4729	15.3943	19.7295	31.6521	28.4443	21.3431	1.37146	7.85986	protein_coding
ENSG00000085721	RRN3	63.0685	1.98945	0.42121	4.72318	2.3219e-06	2.6212e-05	20.7235	14.8303	24.9107	36.8536	44.546	33.6366	7.50711	21.8918	21.2147	164.832	158.845	59.7661	42.5741	29.61	264.532	40.746	48.001	100.213	protein_coding
ENSG00000141540	TTYH2	7.2709	1.98871	0.661309	3.00723	0.00263638	0.0116701	3.27212	4.63448	3.55866	3.07113	3.62584	1.56449	1.87678	0.841994	3.68952	6.52799	0	8.14993	9.34554	20.4207	1.42222	43.6564	3.42864	11.7898	protein_coding
ENSG00000179163	FUCA1	29.9802	1.98713	0.432899	4.59028	4.42651e-06	4.66443e-05	5.45354	12.0496	18.683	10.2371	19.6831	8.60472	9.38389	17.6819	6.45665	171.36	45.2708	36.2219	42.5741	35.7362	14.2222	34.9251	29.4863	21.6146	protein_coding
ENSG00000151726	ACSL1	26.8701	1.98654	0.596426	3.33074	0.000866147	0.00455075	21.8142	1.85379	7.11733	16.3794	6.7337	6.25798	5.63033	10.1039	21.2147	8.97598	56.39	4.52774	20.7679	14.2945	203.377	32.0147	22.629	23.5796	protein_coding
ENSG00000151287	TEX30	4.62692	1.9852	0.564628	3.51595	0.000438185	0.00255486	0	1.85379	0	2.04742	3.10786	2.34674	1.87678	2.52598	2.76714	17.952	4.76535	9.05548	9.34554	7.14724	8.5333	3.88057	4.11437	1.96496	protein_coding
ENSG00000235609	AF127577.4	2.39952	1.98272	0.794165	2.49661	0.0125385	0.0418145	2.18142	0	0	0	0.517977	3.12899	0	2.52598	0	4.89599	2.38267	0.905548	1.03839	8.16828	4.26665	5.82085	3.42864	3.92993	lncRNA
ENSG00000168899	VAMP5	36.2615	1.98217	0.390051	5.08181	3.73861e-07	5.12465e-06	9.81637	11.1227	10.676	9.21339	20.2011	7.82247	11.2607	15.9979	35.0504	73.4399	63.538	76.066	19.7295	107.209	12.7999	70.8204	37.0293	60.9139	protein_coding
ENSG00000167720	SRR	5.87009	1.982	0.6643	2.9836	0.0028488	0.0124903	1.09071	2.78069	3.55866	2.04742	3.10786	4.69348	1.87678	0.841994	0.922379	15.504	8.73647	13.5832	0	18.3786	0	1.94028	8.91446	17.6847	protein_coding
ENSG00000120889	TNFRSF10B	25.1133	1.97892	0.443494	4.46212	8.11536e-06	8.03362e-05	10.9071	0.926896	10.676	16.3794	13.4674	1.56449	20.6446	10.9459	7.37903	73.4399	19.0614	27.1664	25.9598	23.4838	82.4886	21.3431	52.8011	33.4044	protein_coding
ENSG00000196814	MVB12B	8.14137	1.97625	0.632572	3.12415	0.00178321	0.00838991	7.63496	1.85379	0	4.09484	5.69775	2.34674	1.87678	3.36798	2.76714	8.97598	50.0362	5.43329	2.07679	22.4628	12.7999	7.76114	3.42864	3.92993	protein_coding
ENSG00000106546	AHR	87.9086	1.97568	0.569266	3.47058	0.000519326	0.00294018	64.3518	28.7338	51.6006	18.4268	22.791	25.8142	65.6872	26.9438	17.5252	2.448	90.5416	28.9775	20.7679	365.53	75.3775	311.416	188.575	176.847	protein_coding
ENSG00000182326	C1S	2.48628	1.97228	0.743267	2.65353	0.0079655	0.0289807	1.09071	0	0	3.07113	1.03595	0.782247	1.87678	0.841994	0.922379	2.448	1.58845	1.8111	1.03839	4.08414	4.26665	9.70142	8.22874	1.96496	protein_coding
ENSG00000136877	FPGS	112.726	1.97199	0.241867	8.15322	3.54361e-16	2.61959e-14	22.9049	50.9793	36.4763	50.1618	58.0134	47.7171	33.782	41.2577	68.2561	86.4958	275.596	191.071	226.37	158.26	126.577	177.536	153.603	224.006	protein_coding
ENSG00000156162	DPY19L4	10.6887	1.97099	0.431914	4.5634	5.03322e-06	5.21962e-05	3.27212	5.56137	5.338	5.11855	8.28763	3.12899	5.63033	1.68399	0.922379	33.4559	7.94225	25.3553	12.4607	14.2945	5.68887	17.4626	17.1432	19.6496	protein_coding
ENSG00000102870	ZNF629	25.441	1.9688	0.256688	7.67002	1.7197e-14	9.01013e-13	15.2699	11.1227	11.5657	8.18968	9.84157	7.04023	5.63033	12.6299	11.0685	54.6719	41.2997	38.9385	51.9197	23.4838	36.9776	47.537	29.4863	41.2643	protein_coding
ENSG00000057019	DCBLD2	5.20337	1.96773	0.775504	2.53736	0.0111691	0.0381151	3.27212	4.63448	0	2.04742	2.07191	1.56449	0	4.20997	0.922379	35.0879	3.97112	10.8666	5.19197	0	5.68887	0.970142	1.37146	11.7898	protein_coding
ENSG00000066926	FECH	16.8891	1.96759	0.449363	4.37862	1.19431e-05	0.000112818	14.1792	0.926896	10.676	9.21339	5.69775	5.47573	3.75356	5.89396	6.45665	63.6479	19.8556	26.2609	34.267	20.4207	14.2222	45.5967	9.60019	7.85986	protein_coding
ENSG00000104375	STK3	14.3056	1.96729	0.396046	4.96732	6.78833e-07	8.83011e-06	7.63496	2.78069	1.77933	7.16597	7.76966	9.38697	7.50711	1.68399	6.45665	8.97598	11.1191	29.8831	22.8447	20.4207	45.5109	20.373	22.629	23.5796	protein_coding
ENSG00000249846	LINC02021	4.49476	1.96361	0.696857	2.81781	0.00483518	0.0193472	2.18142	2.78069	0.889666	3.07113	1.03595	2.34674	0	4.20997	0	26.9279	3.97112	9.05548	6.23036	9.18931	1.42222	4.85071	2.74291	0	lncRNA
ENSG00000166548	TK2	21.2289	1.96291	0.411346	4.77191	1.82486e-06	2.13877e-05	9.81637	12.9765	0.889666	9.21339	13.4674	6.25798	1.87678	1.68399	20.2923	16.32	26.2094	37.1275	23.883	47.9886	32.711	39.7758	38.4008	43.2292	protein_coding
ENSG00000152620	NADK2	37.4364	1.95953	0.348221	5.62725	1.83106e-08	3.33337e-07	9.81637	10.1959	18.683	22.5216	23.309	12.516	26.2749	9.26193	6.45665	86.4958	73.0687	60.6717	63.342	39.8204	116.622	38.8057	36.3436	19.6496	protein_coding
ENSG00000275202	AL161421.1	5.86715	1.95907	0.50859	3.85196	0.000117177	0.000821442	1.09071	2.78069	0.889666	3.07113	3.10786	1.56449	0	4.20997	3.68952	17.136	5.55957	7.24438	10.3839	7.14724	5.68887	13.582	2.74291	15.7197	lncRNA
ENSG00000111640	GAPDH	4700.48	1.95831	0.281785	6.94965	3.66184e-12	1.2956e-10	1718.96	1901.99	1283.79	982.762	2318.98	1347.81	3864.29	1521.48	2380.66	2875.58	7653.94	6498.21	5778.66	11297.7	8625.74	8742.92	10765.2	5049.96	protein_coding
ENSG00000164674	SYTL3	38.5363	1.95596	0.728352	2.68546	0.00724297	0.026892	41.4469	6.48827	13.345	1.02371	5.69775	1.56449	28.1517	14.3139	30.4385	6.52799	52.4188	3.62219	49.8429	29.61	257.421	10.6716	5.48582	135.583	protein_coding
ENSG00000141682	PMAIP1	420.755	1.95591	0.556944	3.51186	0.000444991	0.00258452	235.593	179.818	174.375	210.884	99.9696	127.506	174.54	191.133	157.727	31.0079	382.022	131.304	321.902	74.5355	1897.24	215.372	940.819	2027.84	protein_coding
ENSG00000105755	ETHE1	78.8561	1.95569	0.240107	8.14509	3.79005e-16	2.75198e-14	26.177	30.5876	32.9176	27.6402	39.8842	33.6366	15.0142	33.6798	48.8861	146.064	121.516	110.477	128.761	169.492	48.3554	162.014	146.06	98.2482	protein_coding
ENSG00000119705	SLIRP	112.623	1.95553	0.221604	8.82446	1.09986e-18	1.10997e-16	23.9956	38.0027	66.725	34.8061	74.5887	50.0638	26.2749	53.0456	43.3518	200.736	171.553	208.276	121.492	176.639	152.177	199.849	230.405	155.232	protein_coding
ENSG00000187792	ZNF70	27.2479	1.95344	0.454969	4.29356	1.7583e-05	0.00015654	10.9071	12.9765	13.345	10.2371	10.3595	14.8627	11.2607	14.3139	2.76714	105.264	36.5343	38.9385	88.2634	10.2103	19.911	64.0294	16.4575	9.82482	protein_coding
ENSG00000122779	TRIM24	59.8283	1.95193	0.448964	4.34763	1.37615e-05	0.000126641	25.0863	25.0262	30.2486	31.735	24.3449	27.3787	26.2749	16.8399	13.8357	65.2799	36.5343	45.2774	158.874	47.9886	379.732	52.3877	28.8006	41.2643	protein_coding
ENSG00000165030	NFIL3	58.756	1.95147	0.671543	2.90595	0.00366143	0.0154351	53.4447	4.63448	28.4693	6.14226	13.4674	12.516	9.38389	27.7858	60.877	12.24	77.834	16.2999	141.221	4.08414	445.154	16.4924	54.8582	72.7037	protein_coding
ENSG00000070495	JMJD6	119.899	1.94944	0.517394	3.7678	0.000164693	0.00110805	55.6261	61.1751	39.1453	40.9484	36.7764	37.5479	52.5498	79.1474	40.5847	47.3279	123.105	111.382	227.408	29.61	957.152	51.4175	78.8587	88.4234	protein_coding
ENSG00000137710	RDX	185.781	1.94893	0.301769	6.45834	1.05854e-10	2.96965e-09	83.9845	106.593	64.056	57.3278	87.0202	61.7975	75.0711	79.1474	71.9456	157.488	339.134	208.276	279.328	200.123	847.641	251.267	157.717	216.146	protein_coding
ENSG00000123219	CENPK	21.9694	1.94887	0.317301	6.14203	8.1476e-10	1.92938e-08	8.72566	9.26896	2.669	11.2608	6.7337	10.9515	11.2607	10.1039	11.0685	26.9279	19.8556	59.7661	18.6911	27.5679	29.8665	48.5071	37.0293	45.1942	protein_coding
ENSG00000104419	NDRG1	247.977	1.94729	0.3913	4.97646	6.4757e-07	8.47477e-06	128.704	75.0785	69.394	77.802	73.5528	68.8378	131.374	125.457	169.718	84.0478	994.369	172.054	542.041	252.196	686.931	137.76	269.491	404.783	protein_coding
ENSG00000167085	PHB	234.137	1.94667	0.376357	5.1724	2.31104e-07	3.33824e-06	59.9889	147.376	96.0839	71.6597	103.077	93.0874	80.7014	85.8834	129.133	220.32	270.831	568.684	511.928	160.302	58.3109	169.775	585.612	801.706	protein_coding
ENSG00000167315	ACAA2	50.3725	1.94649	0.304761	6.38695	1.6923e-10	4.59335e-09	26.177	17.611	26.69	15.3557	18.6472	17.2094	26.2749	23.5758	16.6028	79.1518	93.7185	99.6102	14.5375	100.061	49.7776	69.8502	123.431	88.4234	protein_coding
ENSG00000113407	TARS	234.748	1.94453	0.501802	3.8751	0.000106583	0.000755985	74.1682	73.2247	74.732	101.347	66.8191	104.821	146.389	103.565	126.366	118.32	285.127	172.96	236.754	88.83	1922.84	91.1934	127.545	310.464	protein_coding
ENSG00000136305	CIDEB	28.2022	1.94407	0.474123	4.10034	4.12543e-05	0.000330536	10.9071	9.26896	16.9037	16.3794	13.9854	6.25798	0	15.9979	13.8357	50.5919	16.6787	57.0495	143.298	20.4207	9.95551	19.4028	49.3724	37.3343	protein_coding
ENSG00000062524	LTK	18.799	1.94128	0.546047	3.55515	0.000377764	0.00226222	1.09071	6.48827	8.89666	6.14226	12.4315	10.9515	18.7678	3.36798	2.76714	14.688	69.8918	6.33883	51.9197	62.2831	34.1332	10.6716	11.6574	5.89489	protein_coding
ENSG00000178695	KCTD12	24.8511	1.94018	0.537586	3.60905	0.000307318	0.00189858	9.81637	7.41516	15.1243	6.14226	18.1292	3.91124	7.50711	9.26193	14.7581	10.608	30.1805	67.9161	3.11518	33.6941	8.5333	16.4924	131.66	53.054	protein_coding
ENSG00000166900	STX3	55.5347	1.93949	0.425884	4.55404	5.26256e-06	5.4387e-05	29.4491	17.611	20.4623	19.4505	21.755	21.1207	20.6446	21.0499	34.128	39.1679	73.8629	46.1829	48.8045	50.0307	344.176	61.119	20.5718	110.038	protein_coding
ENSG00000177084	POLE	122.61	1.93939	0.315954	6.1382	8.34614e-10	1.97329e-08	34.9027	61.1751	58.718	29.6876	52.8337	61.7975	84.455	42.0997	33.2056	268.463	88.1589	353.164	193.141	228.712	108.088	272.61	174.861	60.9139	protein_coding
ENSG00000102221	JADE3	8.72482	1.93856	0.556409	3.48406	0.000493876	0.00281731	6.54425	0	4.44833	3.07113	2.07191	1.56449	11.2607	2.52598	2.76714	22.032	21.4441	15.3943	13.4991	3.0631	14.2222	4.85071	2.74291	25.5445	protein_coding
ENSG00000131069	ACSS2	14.2414	1.93356	0.598415	3.23114	0.00123297	0.00615545	7.63496	5.56137	0.889666	5.11855	16.0573	3.12899	7.50711	4.20997	2.76714	1.632	9.5307	10.8666	28.0366	76.5776	12.7999	46.5668	9.60019	7.85986	protein_coding
ENSG00000235162	C12orf75	53.9058	1.93338	0.335549	5.76184	8.32026e-09	1.61226e-07	15.2699	19.4648	16.9037	30.7113	23.309	21.9029	11.2607	37.0477	23.9819	56.3039	147.726	54.3329	76.8411	54.1148	59.7331	29.1043	164.575	127.723	protein_coding
ENSG00000138378	STAT4	4.97247	1.93238	0.632119	3.05699	0.00223572	0.0101474	4.36283	0.926896	4.44833	2.04742	1.55393	0	1.87678	1.68399	1.84476	8.15998	9.5307	0.905548	10.3839	7.14724	5.68887	18.4327	0.685728	9.82482	protein_coding
ENSG00000281103	TRG-AS1	9.26731	1.93026	0.465157	4.1497	3.32914e-05	0.000274906	4.36283	6.48827	2.669	1.02371	4.66179	1.56449	3.75356	0.841994	9.22379	12.24	6.3538	16.2999	26.9982	15.3155	12.7999	24.2536	6.17155	11.7898	lncRNA
ENSG00000076248	UNG	66.9443	1.92978	0.399792	4.82697	1.38628e-06	1.67703e-05	5.45354	38.9296	17.7933	11.2608	39.3663	25.8142	35.6588	41.2577	35.0504	146.88	24.621	155.754	176.527	115.377	79.6441	147.462	74.7444	33.4044	protein_coding
ENSG00000122126	OCRL	7.03562	1.92891	0.699203	2.75873	0.00580264	0.0224247	1.09071	1.85379	1.77933	15.3557	2.07191	2.34674	0	1.68399	0	30.1919	15.0903	15.3943	6.23036	4.08414	1.42222	2.91043	5.48582	19.6496	protein_coding
ENSG00000153044	CENPH	24.1794	1.92695	0.477548	4.03508	5.45833e-05	0.000423295	9.81637	9.26896	11.5657	11.2608	10.3595	17.9917	0	11.7879	7.37903	94.6558	73.0687	30.7886	4.15357	14.2945	54.0442	32.0147	19.2004	23.5796	protein_coding
ENSG00000198520	C1orf228	228.069	1.92436	0.278215	6.91681	4.6192e-12	1.60785e-10	97.073	101.959	61.387	64.4937	134.674	96.9987	161.403	73.2535	66.4113	163.2	189.82	373.086	475.584	544.211	220.444	511.265	300.349	469.627	protein_coding
ENSG00000145391	SETD7	57.4923	1.92394	0.338191	5.68892	1.27846e-08	2.39704e-07	28.3584	15.7572	25.8003	28.6639	26.4168	21.1207	30.0284	21.8918	17.5252	102.816	156.462	81.4993	58.15	25.5259	108.088	45.5967	46.6295	194.531	protein_coding
ENSG00000117868	ESYT2	199.797	1.9227	0.180747	10.6375	1.9937e-26	5.16884e-24	67.6239	52.833	82.739	108.513	79.2505	67.2733	120.114	117.037	59.0323	354.143	301.805	286.153	264.79	389.014	294.399	357.012	260.577	334.044	protein_coding
ENSG00000276231	PIK3R6	17.6899	1.92182	0.579961	3.31371	0.000920676	0.00479536	4.36283	6.48827	4.44833	5.11855	8.28763	9.38697	15.0142	7.57795	6.45665	26.1119	3.97112	12.6777	7.26875	82.7038	19.911	77.6114	1.37146	19.6496	protein_coding
ENSG00000076641	PAG1	530.331	1.91963	0.304411	6.30604	2.86272e-10	7.38366e-09	202.872	137.181	146.795	260.022	170.414	172.877	523.621	207.131	179.864	1246.03	1065.06	710.855	460.008	386.972	1466.31	563.653	620.584	1025.71	protein_coding
ENSG00000196411	EPHB4	31.1329	1.91492	0.324741	5.89674	3.70747e-09	7.66839e-08	8.72566	14.8303	9.78633	23.5453	13.9854	17.9917	7.50711	9.26193	11.0685	76.7038	38.1228	69.7272	42.5741	16.3366	68.2664	30.0744	66.5156	35.3694	protein_coding
ENSG00000127922	SHFM1	90.1041	1.9086	0.350227	5.44959	5.04849e-08	8.39758e-07	26.177	19.4648	38.2556	87.0154	56.4595	45.3703	3.75356	28.6278	33.2056	200.736	221.589	93.2714	88.2634	114.356	191.999	126.118	93.9447	153.267	protein_coding
ENSG00000128596	CCDC136	8.34337	1.90792	0.785467	2.42903	0.0151394	0.0488417	4.36283	2.78069	1.77933	1.02371	2.07191	1.56449	11.2607	1.68399	6.45665	66.9119	0.794225	3.62219	26.9982	1.02103	7.11108	3.88057	6.85728	0	protein_coding
ENSG00000146425	DYNLT1	45.3244	1.90767	0.400305	4.76553	1.88359e-06	2.19733e-05	49.0819	3.70758	10.676	36.8536	12.4315	15.6449	3.75356	26.1018	12.9133	53.8559	73.8629	65.1994	121.492	104.146	65.422	38.8057	45.2581	76.6336	protein_coding
ENSG00000214140	PRCD	11.5101	1.90714	0.610397	3.12443	0.0017815	0.00838448	2.18142	8.34206	7.11733	2.04742	4.14382	0.782247	0	1.68399	16.6028	52.2239	14.296	2.71664	13.4991	4.08414	21.3332	8.73128	19.8861	27.5095	protein_coding
ENSG00000164300	SERINC5	65.3595	1.90712	0.386733	4.93137	8.16534e-07	1.04229e-05	27.2677	22.2455	39.1453	21.4979	27.9708	34.4189	28.1517	29.4698	17.5252	97.9198	52.4188	79.6882	359.284	51.0517	32.711	127.089	63.7727	64.8438	protein_coding
ENSG00000176619	LMNB2	33.7311	1.90426	0.320119	5.94859	2.70458e-09	5.70389e-08	5.45354	14.8303	16.014	9.21339	14.5034	13.2982	20.6446	15.1559	20.2923	90.5758	34.9459	61.5772	31.1518	37.7783	63.9997	36.8654	95.3162	25.5445	protein_coding
ENSG00000137812	CASC5	31.0418	1.90403	0.359241	5.30014	1.15715e-07	1.81439e-06	20.7235	3.70758	7.11733	7.16597	16.5753	14.8627	16.891	14.3139	16.6028	44.0639	91.3358	46.1829	18.6911	21.4417	63.9997	30.0744	56.2297	68.7738	protein_coding
ENSG00000275527	AC100835.2	7.08827	1.90393	0.73101	2.60453	0.00920015	0.0325742	3.27212	1.85379	7.11733	0	5.17977	1.56449	3.75356	3.36798	0.922379	32.6399	11.1191	9.05548	1.03839	3.0631	5.68887	35.8953	2.05718	0	lncRNA
ENSG00000102524	TNFSF13B	110.422	1.90292	0.691927	2.75018	0.00595629	0.0228949	47.9912	46.3448	32.028	17.4031	79.7685	43.0236	35.6588	52.2036	64.5665	13.872	15.8845	264.42	28.0366	1020.01	4.26665	110.596	32.9149	78.5986	protein_coding
ENSG00000137501	SYTL2	7.73443	1.89833	0.67647	2.80622	0.00501258	0.0199297	8.72566	2.78069	5.338	1.02371	4.66179	2.34674	3.75356	0.841994	0	25.2959	20.6498	17.2054	524.389	2.04207	1.42222	10.6716	0.685728	25.5445	protein_coding
ENSG00000124766	SOX4	2495.28	1.89804	0.371487	5.10931	3.23337e-07	4.5186e-06	881.292	1127.1	893.225	1021.66	771.786	770.514	1959.36	1097.96	980.489	922.078	7284.63	5670.54	4347.75	2783.34	4370.47	1835.51	852.36	7345.04	protein_coding
ENSG00000021762	OSBPL5	28.6036	1.89693	0.435578	4.35498	1.33079e-05	0.000123678	4.36283	1.85379	15.1243	7.16597	16.5753	4.69348	18.7678	15.9979	24.9042	30.1919	21.4441	38.9385	58.15	107.209	14.2222	53.3578	44.5723	37.3343	protein_coding
ENSG00000273174	AC108673.2	7.67308	1.89047	0.606718	3.1159	0.00183387	0.00857191	1.09071	8.34206	0	5.11855	3.10786	0	3.75356	5.89396	1.84476	15.504	11.1191	5.43329	3.11518	5.10517	36.9776	7.76114	8.22874	15.7197	lncRNA
ENSG00000173905	GOLIM4	79.8497	1.89004	0.436032	4.33464	1.45999e-05	0.000133215	56.7168	16.6841	30.2486	36.8536	35.2224	38.3301	28.1517	31.1538	31.3609	13.872	124.693	42.5607	374.86	45.9466	145.066	100.895	82.2874	202.391	protein_coding
ENSG00000136636	KCTD3	45.62	1.88998	0.297835	6.34574	2.21356e-10	5.88814e-09	23.9956	25.0262	21.352	23.5453	21.755	20.3384	15.0142	17.6819	4.6119	32.6399	81.8051	67.0105	63.342	42.8835	52.622	110.596	82.9731	113.968	protein_coding
ENSG00000054793	ATP9A	15.7853	1.88954	0.418322	4.51694	6.27388e-06	6.39163e-05	14.1792	9.26896	4.44833	3.07113	7.25168	6.25798	3.75356	8.41994	3.68952	65.2799	13.5018	15.3943	539.964	25.5259	24.1777	37.8355	17.8289	11.7898	protein_coding
ENSG00000167216	KATNAL2	6.36814	1.88895	0.619878	3.0473	0.0023091	0.0104207	2.18142	0.926896	7.11733	1.02371	2.07191	2.34674	5.63033	3.36798	0	2.448	20.6498	11.7721	12.4607	1.02103	15.6444	4.85071	3.42864	17.6847	protein_coding
ENSG00000150977	RILPL2	108.963	1.88891	0.48453	3.89845	9.68114e-05	0.000698538	70.896	18.5379	24.021	31.735	38.3303	22.6852	76.9479	31.1538	103.306	60.3839	100.867	55.2384	204.563	78.6197	708.264	67.9099	116.574	151.302	protein_coding
ENSG00000159216	RUNX1	123.557	1.88707	0.333963	5.65053	1.5995e-08	2.95475e-07	62.1704	47.2717	32.028	46.067	56.9775	46.9348	99.4692	48.8357	36.8952	414.527	234.296	168.432	369.668	155.197	96.7107	79.5517	140.574	88.4234	protein_coding
ENSG00000075239	ACAT1	13.5017	1.88429	0.40517	4.65063	3.30927e-06	3.60789e-05	9.81637	3.70758	0.889666	8.18968	6.21573	6.25798	0	10.9459	4.6119	8.97598	29.3863	36.2219	30.1134	14.2945	17.0666	15.5223	19.2004	21.6146	protein_coding
ENSG00000169750	RAC3	3.53291	1.88355	0.650056	2.89752	0.00376129	0.0157853	2.18142	0	0	1.02371	2.07191	2.34674	0	2.52598	2.76714	5.71199	3.97112	16.2999	2.07679	3.0631	4.26665	1.94028	5.48582	7.85986	protein_coding
ENSG00000160712	IL6R	43.401	1.88224	0.563187	3.34212	0.000831398	0.00439233	11.9978	2.78069	20.4623	3.07113	26.9348	15.6449	9.38389	27.7858	47.9637	27.7439	11.1191	122.249	86.1866	161.323	5.68887	102.835	68.5728	29.4745	protein_coding
ENSG00000160360	GPSM1	80.4098	1.87798	0.313752	5.98558	2.1562e-09	4.61206e-08	26.177	39.8565	28.4693	37.8773	36.2584	41.4591	52.5498	21.0499	26.749	155.04	86.5705	92.3659	73.7259	80.6617	248.888	235.745	48.001	115.933	protein_coding
ENSG00000179855	GIPC3	5.68964	1.87383	0.645303	2.90379	0.00368676	0.0155201	1.09071	3.70758	2.669	1.02371	5.69775	0.782247	1.87678	2.52598	1.84476	2.448	2.38267	3.62219	39.4589	7.14724	7.11108	9.70142	90.5161	5.89489	protein_coding
ENSG00000129007	CALML4	5.81975	1.87321	0.567245	3.30229	0.000959	0.00497258	3.27212	1.85379	2.669	6.14226	0.517977	2.34674	1.87678	4.20997	0	13.056	4.76535	7.24438	3.11518	19.3997	1.42222	8.73128	12.3431	11.7898	protein_coding
ENSG00000222041	CYTOR	59.4739	1.87259	0.513725	3.64512	0.000267262	0.00168354	40.3562	19.4648	16.014	19.4505	38.3303	13.2982	33.782	24.4178	24.9042	27.7439	20.6498	42.5607	132.914	144.987	93.8663	342.46	13.7146	21.6146	lncRNA
ENSG00000224046	AC005076.1	2.45634	1.87147	0.728885	2.56758	0.0102412	0.0355734	3.27212	0.926896	0	1.02371	1.55393	0.782247	0	1.68399	0	8.15998	3.1769	0.905548	2.07679	2.04207	7.11108	6.79099	2.74291	1.96496	lncRNA
ENSG00000157107	FCHO2	6.81219	1.87135	0.696051	2.68853	0.00717676	0.0267187	3.27212	0.926896	0.889666	2.04742	2.07191	3.91124	0	7.57795	4.6119	4.89599	13.5018	13.5832	19.7295	0	5.68887	5.82085	0.685728	33.4044	protein_coding
ENSG00000170638	TRABD	383.448	1.86671	0.311689	5.98901	2.11118e-09	4.53512e-08	153.79	176.11	137.009	174.031	178.184	136.111	225.213	176.819	129.133	835.582	1100.8	367.652	196.256	301.205	1225.95	311.416	569.84	506.961	protein_coding
ENSG00000124098	FAM210B	50.7463	1.86662	0.422319	4.41992	9.87369e-06	9.54795e-05	34.9027	12.9765	45.373	15.3557	18.6472	13.2982	15.0142	21.8918	19.37	221.952	12.7076	90.5548	56.0732	68.4093	29.8665	116.417	75.4301	45.1942	protein_coding
ENSG00000160191	PDE9A	7.82958	1.8641	0.757718	2.46015	0.0138878	0.0454078	0	2.78069	3.55866	2.04742	1.03595	0.782247	20.6446	0	1.84476	4.89599	26.2094	4.52774	6.23036	9.18931	31.2888	2.91043	1.37146	21.6146	protein_coding
ENSG00000240005	AC106047.1	3.80454	1.86213	0.686925	2.71083	0.00671154	0.0252051	0	1.85379	2.669	1.02371	3.62584	0.782247	0	2.52598	0.922379	8.15998	7.94225	7.24438	1.03839	1.02103	9.95551	1.94028	2.05718	15.7197	lncRNA
ENSG00000175110	MRPS22	18.2052	1.86142	0.293488	6.3424	2.26211e-10	5.97809e-09	10.9071	7.41516	5.338	15.3557	9.84157	7.04023	1.87678	5.89396	5.53427	39.1679	32.5632	22.6387	21.8063	25.5259	36.9776	31.0445	21.2576	27.5095	protein_coding
ENSG00000113648	H2AFY	610.569	1.86053	0.293764	6.33342	2.39786e-10	6.29259e-09	317.396	240.993	241.989	236.477	259.507	310.552	292.777	228.18	246.275	666.671	1194.51	644.75	544.118	2154.38	479.287	1772.45	670.642	489.276	protein_coding
ENSG00000102543	CDADC1	27.1486	1.86018	0.378527	4.91425	8.91211e-07	1.12804e-05	9.81637	12.0496	8.89666	10.2371	9.32359	17.2094	3.75356	14.3139	18.4476	31.0079	35.7401	16.2999	97.609	16.3366	65.422	64.0294	26.7434	31.4394	protein_coding
ENSG00000174004	NRROS	39.8263	1.85928	0.405075	4.58996	4.43326e-06	4.66828e-05	31.6305	1.85379	16.014	31.735	15.0213	14.8627	13.1374	24.4178	6.45665	81.5998	30.1805	42.5607	62.3036	76.5776	109.511	94.1038	45.2581	19.6496	protein_coding
ENSG00000101945	SUV39H1	14.4518	1.85844	0.405849	4.57914	4.66898e-06	4.87891e-05	3.27212	6.48827	4.44833	3.07113	9.32359	3.91124	15.0142	8.41994	3.68952	13.872	22.2383	54.3329	13.4991	16.3366	8.5333	26.1938	21.9433	25.5445	protein_coding
ENSG00000105538	RASIP1	4.10182	1.85483	0.728103	2.54748	0.0108504	0.0372421	2.18142	1.85379	0	0	3.10786	1.56449	5.63033	2.52598	0	7.34399	2.38267	20.8276	8.30715	2.04207	2.84443	0.970142	10.2859	1.96496	protein_coding
ENSG00000102172	SMS	117.558	1.85359	0.336203	5.51331	3.52155e-08	5.997e-07	54.5354	27.8069	49.8213	75.7545	40.4022	40.6769	26.2749	57.2556	84.8589	182.784	408.232	183.826	77.8795	91.8931	115.2	120.298	140.574	337.974	protein_coding
ENSG00000005893	LAMP2	80.0077	1.85352	0.243071	7.6254	2.43279e-14	1.24853e-12	27.2677	24.0993	32.028	24.569	45.582	46.1526	24.3981	32.8378	52.5756	126.48	198.556	140.36	95.5322	159.281	96.7107	124.178	63.7727	125.758	protein_coding
ENSG00000167851	CD300A	10.2331	1.85272	0.461278	4.01649	5.9071e-05	0.000454348	5.45354	1.85379	3.55866	2.04742	4.14382	6.25798	0	7.57795	8.30141	27.7439	7.14802	19.0165	9.34554	28.589	11.3777	26.1938	11.6574	3.92993	protein_coding
ENSG00000104221	BRF2	8.43999	1.85219	0.476453	3.88746	0.000101299	0.000723967	3.27212	1.85379	1.77933	5.11855	4.66179	1.56449	0	7.57795	5.53427	21.216	15.8845	9.05548	8.30715	8.16828	22.7555	6.79099	4.8001	23.5796	protein_coding
ENSG00000175606	TMEM70	24.4877	1.85193	0.343715	5.38799	7.12498e-08	1.15451e-06	8.72566	14.8303	10.676	14.3319	17.0932	7.82247	13.1374	5.89396	2.76714	29.3759	57.9784	48.8996	11.4223	33.6941	42.6665	45.5967	26.7434	49.1241	protein_coding
ENSG00000166845	C18orf54	4.7587	1.84831	0.516794	3.57649	0.000348236	0.00211487	2.18142	1.85379	2.669	3.07113	2.07191	2.34674	1.87678	1.68399	0.922379	16.32	3.1769	9.05548	2.07679	5.10517	7.11108	8.73128	7.54301	7.85986	protein_coding
ENSG00000109084	TMEM97	27.5428	1.84294	0.331652	5.55684	2.74696e-08	4.79746e-07	19.6327	10.1959	17.7933	4.09484	10.3595	11.7337	7.50711	13.4719	12.9133	18.768	42.0939	86.027	38.4205	33.6941	19.911	48.5071	53.4868	47.1591	protein_coding
ENSG00000276023	NA_100	9.04301	1.84222	0.434144	4.24335	2.20211e-05	0.000190634	3.27212	3.70758	0.889666	4.09484	7.25168	3.91124	1.87678	4.20997	5.53427	21.216	5.55957	12.6777	7.26875	19.3997	9.95551	19.4028	24.6862	7.85986	protein_coding
ENSG00000141447	OSBPL1A	12.1348	1.84007	0.620615	2.96491	0.0030277	0.0131241	9.81637	2.78069	8.007	3.07113	2.58989	5.47573	3.75356	3.36798	9.22379	4.89599	11.1191	14.4888	0	40.8414	9.95551	51.4175	35.6579	1.96496	protein_coding
ENSG00000182022	CHST15	95.7483	1.83881	0.439243	4.18631	2.83524e-05	0.000237249	35.9934	38.0027	40.9246	36.8536	41.4382	57.1041	24.3981	58.0976	42.4294	258.671	78.6282	332.336	66.4572	21.4417	32.711	72.7607	143.317	341.904	protein_coding
ENSG00000138760	SCARB2	30.5262	1.8381	0.313034	5.8719	4.30826e-09	8.77823e-08	9.81637	14.8303	16.014	17.4031	13.9854	16.4272	1.87678	15.9979	11.0685	69.3599	26.2094	38.9385	39.4589	80.6617	51.1998	59.1787	19.8861	47.1591	protein_coding
ENSG00000179051	RCC2	199.39	1.83638	0.517762	3.54677	0.000389989	0.0023234	94.8916	12.0496	103.201	196.552	132.602	132.982	18.7678	56.4136	36.8952	1091.81	385.993	288.87	261.675	128.65	325.688	166.864	70.63	84.4935	protein_coding
ENSG00000018510	AGPS	43.7572	1.83357	0.565177	3.24425	0.0011776	0.00592622	19.6327	13.9034	13.345	18.4268	21.755	19.5562	15.0142	36.2057	14.7581	25.2959	39.7112	36.2219	46.7277	78.6197	12.7999	303.654	72.0014	0	protein_coding
ENSG00000143621	ILF2	117.248	1.83246	0.300769	6.09259	1.11097e-09	2.54272e-08	51.2633	49.1255	56.9386	76.7783	40.4022	40.6769	30.0284	49.6777	66.4113	295.391	178.701	110.477	144.337	66.3673	401.065	140.671	125.488	186.672	protein_coding
ENSG00000180530	NRIP1	259.34	1.83232	0.389968	4.69863	2.61909e-06	2.91944e-05	157.062	122.35	92.5253	75.7545	84.4303	145.498	131.374	110.301	104.229	109.344	925.272	498.051	92.417	215.438	760.886	322.087	145.374	575.735	protein_coding
ENSG00000059377	TBXAS1	37.0899	1.83103	0.55012	3.32843	0.000873381	0.00458395	19.6327	7.41516	12.4553	3.07113	32.1146	7.82247	26.2749	15.9979	22.1371	12.24	16.6787	10.8666	34.267	152.134	17.0666	136.79	113.145	27.5095	protein_coding
ENSG00000171310	CHST11	100.306	1.82692	0.395013	4.62497	3.74658e-06	4.02077e-05	43.6283	38.0027	46.2626	45.0432	29.5247	30.5076	30.0284	43.7837	89.4708	109.344	141.372	72.4438	171.335	85.7669	564.62	64.0294	129.603	70.7387	protein_coding
ENSG00000165801	ARHGEF40	12.649	1.82673	0.643755	2.83761	0.0045452	0.0184221	4.36283	8.34206	1.77933	4.09484	10.3595	1.56449	3.75356	7.57795	7.37903	6.52799	7.14802	11.7721	13.4991	38.7993	89.5996	5.82085	1.37146	3.92993	protein_coding
ENSG00000155959	VBP1	42.3919	1.82583	0.279876	6.52372	6.85848e-11	1.97948e-09	8.72566	18.5379	17.7933	22.5216	31.5966	20.3384	11.2607	16.8399	17.5252	97.1038	94.5127	85.1215	33.2286	38.7993	61.1553	52.3877	58.9726	76.6336	protein_coding
ENSG00000023572	GLRX2	6.78681	1.82558	0.465527	3.92154	8.7986e-05	0.000642255	4.36283	2.78069	2.669	0	4.66179	3.91124	0	1.68399	5.53427	14.688	5.55957	9.05548	11.4223	16.3366	2.84443	12.6118	10.2859	13.7548	protein_coding
ENSG00000274213	AC015912.3	5.94899	1.82297	0.666824	2.7338	0.00626073	0.0238095	2.18142	0	0.889666	3.07113	2.58989	0	3.75356	1.68399	9.22379	0.815998	10.3249	2.71664	6.23036	7.14724	19.911	6.79099	6.17155	23.5796	lncRNA
ENSG00000136783	NIPSNAP3A	26.8373	1.82257	0.387546	4.70286	2.56548e-06	2.86819e-05	6.54425	8.34206	13.345	12.2845	20.7191	17.2094	1.87678	15.1559	9.22379	47.3279	33.3574	33.5053	43.6125	69.4304	11.3777	66.9398	61.0298	11.7898	protein_coding
ENSG00000168003	SLC3A2	103.909	1.82197	0.414684	4.39362	1.11479e-05	0.00010623	43.6283	50.0524	59.6076	49.1381	42.9921	23.4674	28.1517	62.3076	51.6532	78.3358	177.112	73.3494	73.7259	57.1779	590.22	56.2682	178.289	174.882	protein_coding
ENSG00000106560	GIMAP2	11.2835	1.81514	0.600303	3.02371	0.00249695	0.0111381	4.36283	0	4.44833	15.3557	5.69775	2.34674	1.87678	2.52598	8.30141	53.0399	10.3249	3.62219	20.7679	22.4628	2.84443	27.164	6.17155	11.7898	protein_coding
ENSG00000126767	ELK1	21.3117	1.81506	0.424106	4.27975	1.87107e-05	0.000165017	13.0885	8.34206	9.78633	11.2608	9.84157	7.04023	9.38389	15.1559	0.922379	57.1199	64.3322	37.1275	21.8063	19.3997	31.2888	11.6417	8.91446	47.1591	protein_coding
ENSG00000198843	SELT	67.7641	1.81367	0.352826	5.14039	2.74163e-07	3.87826e-06	20.7235	21.3186	28.4693	45.0432	47.1359	41.4591	11.2607	35.3638	16.6028	150.144	129.459	67.9161	56.0732	78.6197	267.377	72.7607	51.4296	78.5986	protein_coding
ENSG00000147394	ZNF185	16.2275	1.81367	0.57052	3.17897	0.00147801	0.00715775	13.0885	4.63448	4.44833	7.16597	11.3955	1.56449	1.87678	12.6299	7.37903	1.632	41.2997	41.6552	26.9982	4.08414	2.84443	40.746	41.1437	27.5095	protein_coding
ENSG00000184441	AP001062.1	19.3111	1.81294	0.421095	4.30529	1.66767e-05	0.000149356	14.1792	2.78069	7.11733	17.4031	11.3955	7.04023	7.50711	5.05196	4.6119	41.6159	50.0362	48.8996	22.8447	25.5259	36.9776	13.582	5.48582	25.5445	lncRNA
ENSG00000159228	CBR1	22.3878	1.81134	0.543038	3.33556	0.000851263	0.00448509	5.45354	12.9765	13.345	5.11855	15.0213	8.60472	1.87678	6.73595	19.37	31.8239	13.5018	55.2384	16.6143	108.23	0	32.9848	38.4008	17.6847	protein_coding
ENSG00000173638	SLC19A1	27.5616	1.81074	0.425434	4.25623	2.07905e-05	0.000181443	2.18142	8.34206	8.007	5.11855	21.755	34.4189	9.38389	10.1039	9.22379	27.7439	25.4152	68.8216	45.6893	39.8204	14.2222	41.7161	80.9159	43.2292	protein_coding
ENSG00000168209	DDIT4	212.56	1.81045	0.463467	3.90632	9.37106e-05	0.000679097	100.345	123.277	88.0769	82.9205	68.891	25.8142	75.0711	137.245	146.658	55.4879	202.527	179.298	452.739	27.5679	779.375	257.088	554.068	469.627	protein_coding
ENSG00000154122	ANKH	9.71037	1.81036	0.465565	3.88853	0.000100854	0.000721132	6.54425	2.78069	1.77933	1.02371	5.69775	7.82247	3.75356	5.05196	3.68952	10.608	10.3249	13.5832	2.07679	14.2945	34.1332	23.2834	18.5147	9.82482	protein_coding
ENSG00000166682	TMPRSS5	2.75098	1.80944	0.649177	2.78728	0.0053152	0.0209282	0	1.85379	0.889666	0	1.55393	3.12899	0	1.68399	0.922379	3.26399	2.38267	4.52774	9.34554	3.0631	4.26665	1.94028	4.8001	5.89489	protein_coding
ENSG00000103942	HOMER2	16.2462	1.80751	0.578669	3.12356	0.00178675	0.00840394	9.81637	1.85379	8.89666	9.21339	9.84157	5.47573	1.87678	6.73595	11.0685	17.136	100.867	6.33883	24.9214	41.8624	1.42222	8.73128	18.5147	7.85986	protein_coding
ENSG00000145335	SNCA	9.90795	1.80695	0.599096	3.01613	0.0025602	0.0113697	5.45354	0.926896	8.89666	5.11855	3.10786	2.34674	5.63033	5.89396	2.76714	43.2479	7.94225	23.5442	2.07679	19.3997	4.26665	23.2834	0.685728	13.7548	protein_coding
ENSG00000262873	AC127496.5	2.95849	1.80613	0.71162	2.53805	0.0111472	0.0380695	2.18142	0.926896	1.77933	2.04742	1.55393	0	3.75356	0	0	0.815998	2.38267	7.24438	4.15357	5.10517	4.26665	3.88057	1.37146	11.7898	lncRNA
ENSG00000154429	CCSAP	25.7352	1.80467	0.297886	6.05825	1.37608e-09	3.07985e-08	14.1792	12.0496	8.89666	9.21339	7.76966	13.2982	9.38389	9.26193	19.37	44.0639	59.5669	29.8831	56.0732	38.7993	59.7331	28.1341	21.9433	21.6146	protein_coding
ENSG00000132718	SYT11	35.7877	1.80249	0.388102	4.64436	3.41127e-06	3.70095e-05	21.8142	9.26896	21.352	13.3082	22.791	14.0805	11.2607	13.4719	14.7581	6.52799	98.4839	42.5607	20.7679	53.0938	81.0663	45.5967	59.6583	94.3183	protein_coding
ENSG00000146021	KLHL3	7.90382	1.80085	0.507123	3.55111	0.000383609	0.00228993	6.54425	1.85379	5.338	7.16597	2.58989	2.34674	1.87678	3.36798	0.922379	6.52799	23.8267	11.7721	17.6527	8.16828	18.4888	18.4327	3.42864	1.96496	protein_coding
ENSG00000100439	ABHD4	12.3706	1.79685	0.489887	3.66788	0.00024457	0.00156361	11.9978	4.63448	3.55866	2.04742	6.7337	4.69348	15.0142	3.36798	0	21.216	34.1517	23.5442	14.5375	4.08414	21.3332	18.4327	27.4291	5.89489	protein_coding
ENSG00000196154	S100A4	571.557	1.79648	0.449985	3.99231	6.54336e-05	0.000496681	191.965	215.04	172.595	153.557	334.095	132.2	394.123	242.494	464.879	150.144	1716.32	326.903	479.738	1802.13	210.488	736.338	2091.47	473.556	protein_coding
ENSG00000183784	C9orf66	3.77854	1.79523	0.648675	2.76754	0.00564811	0.0219686	2.18142	3.70758	0.889666	1.02371	1.03595	3.12899	0	0.841994	1.84476	1.632	1.58845	16.2999	4.15357	8.16828	2.84443	6.79099	2.05718	9.82482	lncRNA
ENSG00000120318	ARAP3	6.14121	1.79506	0.703718	2.55083	0.0107468	0.036954	3.27212	2.78069	0.889666	0	7.76966	1.56449	1.87678	0	5.53427	15.504	6.3538	10.8666	9.34554	7.14724	0	6.79099	1.37146	29.4745	protein_coding
ENSG00000065911	MTHFD2	26.4611	1.79499	0.391923	4.57997	4.65051e-06	4.86299e-05	14.1792	10.1959	12.4553	10.2371	13.9854	14.8627	9.38389	10.1039	10.1462	34.2719	31.769	29.8831	52.9581	11.2314	129.422	16.4924	41.1437	23.5796	protein_coding
ENSG00000070404	FSTL3	5.48775	1.79475	0.570404	3.14646	0.00165259	0.00785895	1.09071	1.85379	1.77933	4.09484	3.62584	2.34674	3.75356	2.52598	0.922379	4.89599	3.97112	1.8111	10.3839	3.0631	22.7555	18.4327	7.54301	3.92993	protein_coding
ENSG00000196284	SUPT3H	24.359	1.79441	0.484539	3.70333	0.000212789	0.00138396	6.54425	3.70758	5.338	22.5216	12.4315	14.0805	1.87678	17.6819	11.9909	8.15998	26.2094	40.7496	21.8063	47.9886	98.1329	28.1341	8.22874	62.8789	protein_coding
ENSG00000136929	HEMGN	30.3175	1.79421	0.689136	2.60356	0.00922606	0.0326506	33.812	0.926896	40.9246	8.18968	5.69775	5.47573	11.2607	3.36798	12.9133	111.792	20.6498	39.8441	99.6857	4.08414	44.0887	97.0142	2.05718	3.92993	protein_coding
ENSG00000103876	FAH	17.429	1.79333	0.626081	2.86438	0.00417833	0.0172372	9.81637	2.78069	2.669	0	8.28763	7.04023	33.782	7.57795	0.922379	10.608	14.296	28.072	18.6911	62.2831	2.84443	62.0891	30.172	11.7898	protein_coding
ENSG00000175782	SLC35E3	437.203	1.79331	0.383942	4.67078	3.00063e-06	3.31038e-05	187.602	296.607	278.466	157.651	195.795	197.126	150.142	170.083	128.211	1254.19	672.708	1381.87	863.943	332.857	125.155	619.921	130.288	727.037	protein_coding
ENSG00000100300	TSPO	88.384	1.79307	0.473163	3.78953	0.000150932	0.00102417	31.6305	40.7834	16.014	10.2371	71.9988	21.9029	28.1517	51.3616	83.9365	159.936	104.043	70.6327	58.15	143.966	29.8665	154.253	464.924	49.1241	protein_coding
ENSG00000141026	MED9	41.902	1.79302	0.446648	4.01438	5.96019e-05	0.000457888	31.6305	12.9765	17.7933	19.4505	12.4315	31.2899	16.891	15.9979	9.22379	35.0879	56.39	67.9161	21.8063	22.4628	150.755	28.1341	21.2576	182.742	protein_coding
ENSG00000176903	PNMA1	4.18078	1.79177	0.657287	2.72601	0.00641053	0.024287	1.09071	0	0.889666	4.09484	2.07191	3.91124	0	2.52598	1.84476	13.056	1.58845	13.5832	14.5375	4.08414	1.42222	3.88057	2.74291	3.92993	protein_coding
ENSG00000197170	PSMD12	48.4738	1.78756	0.384782	4.64566	3.38989e-06	3.68042e-05	39.2655	15.7572	29.359	21.4979	18.6472	21.1207	13.1374	19.3659	16.6028	30.1919	114.368	49.8051	57.1116	33.6941	220.444	33.955	43.8866	94.3183	protein_coding
ENSG00000118971	CCND2	315.596	1.78577	0.41589	4.29384	1.75607e-05	0.000156433	87.2566	118.643	149.464	173.007	205.637	118.902	150.142	107.775	165.106	220.32	195.379	375.802	283.481	568.716	1789.15	447.236	74.7444	449.977	protein_coding
ENSG00000116005	PCYOX1	12.7292	1.78328	0.416286	4.2838	1.8373e-05	0.000162511	5.45354	9.26896	8.89666	5.11855	7.76966	4.69348	1.87678	3.36798	4.6119	38.3519	18.2672	35.3164	29.075	8.16828	5.68887	13.582	17.8289	11.7898	protein_coding
ENSG00000108578	BLMH	140.086	1.78236	0.182898	9.74513	1.93523e-22	3.5926e-20	51.2633	74.1516	51.6006	59.3752	68.373	57.1041	78.8247	73.2535	54.4204	137.904	222.383	272.57	133.953	193.997	238.932	230.894	245.491	277.06	protein_coding
ENSG00000131462	TUBG1	30.1911	1.78193	0.404489	4.40538	1.05598e-05	0.000101139	8.72566	16.6841	13.345	11.2608	17.0932	10.9515	26.2749	13.4719	6.45665	84.8638	16.6787	84.2159	14.5375	47.9886	15.6444	79.5517	52.1153	23.5796	protein_coding
ENSG00000135404	CD63	405.278	1.78123	0.24689	7.21468	5.40614e-13	2.2211e-11	157.062	150.157	153.912	227.264	220.658	132.982	110.73	239.126	249.042	506.735	904.622	344.108	407.05	840.312	1052.44	437.534	510.867	650.403	protein_coding
ENSG00000137193	PIM1	48.5265	1.77993	0.550923	3.23081	0.0012344	0.00615931	8.72566	4.63448	29.359	44.0195	36.7764	21.1207	3.75356	24.4178	23.0595	296.207	43.6824	38.9385	51.9197	15.3155	55.4664	89.2531	8.22874	78.5986	protein_coding
ENSG00000117450	PRDX1	580.117	1.77955	0.317796	5.59965	2.1479e-08	3.85877e-07	101.436	341.098	184.161	179.149	327.362	229.198	446.673	261.86	286.86	755.614	1247.73	1582.9	277.251	681.03	467.909	1051.63	1320.71	699.527	protein_coding
ENSG00000143977	SNRPG	78.6583	1.77802	0.36687	4.84647	1.25679e-06	1.54398e-05	28.3584	28.7338	44.4833	62.4463	40.4022	27.3787	18.7678	42.0997	25.8266	270.911	167.581	73.3494	43.6125	73.5145	251.732	61.119	65.1442	90.3884	protein_coding
ENSG00000143797	MBOAT2	16.5082	1.77608	0.428888	4.14113	3.456e-05	0.000283513	5.45354	5.56137	7.11733	5.11855	13.4674	5.47573	13.1374	10.1039	1.84476	26.1119	16.6787	21.7331	16.6143	51.0517	22.7555	48.5071	4.8001	21.6146	protein_coding
ENSG00000130203	APOE	4.36247	1.7759	0.722451	2.45817	0.0139649	0.0456005	4.36283	0.926896	3.55866	2.04742	2.07191	0.782247	3.75356	0	0.922379	0.815998	4.76535	18.111	1.03839	7.14724	9.95551	15.5223	2.74291	0	protein_coding
ENSG00000128011	LRFN1	22.8841	1.77415	0.388161	4.57066	4.86191e-06	5.05941e-05	9.81637	5.56137	11.5657	10.2371	9.32359	6.25798	13.1374	8.41994	19.37	80.7838	11.1191	43.4663	32.1902	35.7362	49.7776	19.4028	12.3431	33.4044	protein_coding
ENSG00000143368	SF3B4	40.4543	1.77413	0.399002	4.44641	8.73182e-06	8.58733e-05	14.1792	7.41516	29.359	50.1618	21.2371	17.9917	0	11.7879	11.0685	100.368	74.6571	57.0495	41.5357	50.0307	103.822	54.328	43.8866	39.2993	protein_coding
ENSG00000182718	ANXA2	187.489	1.77098	0.410436	4.31488	1.59688e-05	0.000143786	42.5376	133.473	86.2976	75.7545	133.12	45.3703	37.5356	112.827	95.9274	35.9039	432.058	119.532	179.642	709.619	220.444	208.581	309.263	396.923	protein_coding
ENSG00000196083	IL1RAP	66.6652	1.76999	0.592029	2.9897	0.00279252	0.0122745	30.5398	34.2951	20.4623	26.6165	20.7191	43.8059	20.6446	47.9937	26.749	19.584	14.296	19.922	87.225	119.461	4.26665	509.325	61.7155	92.3533	protein_coding
ENSG00000162599	NFIA	14.1198	1.76894	0.599801	2.94922	0.00318577	0.0137353	6.54425	4.63448	8.007	5.11855	9.84157	3.12899	11.2607	5.89396	3.68952	25.2959	8.73647	59.7661	22.8447	7.14724	44.0887	26.1938	0	1.96496	protein_coding
ENSG00000272650	AC110792.3	3.9015	1.76609	0.697746	2.53113	0.0113695	0.0386272	0	0.926896	1.77933	4.09484	5.17977	0	0	1.68399	0.922379	9.79198	3.1769	5.43329	3.11518	1.02103	9.95551	1.94028	5.48582	15.7197	lncRNA
ENSG00000070761	CFAP20	20.0667	1.76598	0.502427	3.5149	0.00043992	0.00256101	4.36283	4.63448	13.345	16.3794	7.76966	12.516	1.87678	13.4719	6.45665	70.1759	17.4729	24.4498	13.4991	16.3366	93.8663	15.5223	5.48582	23.5796	protein_coding
ENSG00000152684	PELO	2.98518	1.76452	0.705266	2.50192	0.0123523	0.0412849	2.18142	0.926896	1.77933	1.02371	1.03595	0	0	3.36798	1.84476	13.056	1.58845	3.62219	1.03839	4.08414	8.5333	4.85071	4.8001	0	protein_coding
ENSG00000132432	SEC61G	46.18	1.7642	0.441475	3.99615	6.43816e-05	0.000488942	21.8142	10.1959	15.1243	73.7071	20.7191	16.4272	1.87678	14.3139	13.8357	111.792	130.253	39.8441	42.5741	29.61	78.2219	69.8502	34.9721	106.108	protein_coding
ENSG00000107551	RASSF4	44.8921	1.7633	0.621619	2.83663	0.00455918	0.0184639	55.6261	4.63448	13.345	2.04742	46.6179	5.47573	13.1374	16.8399	25.8266	31.8239	10.3249	146.699	88.2634	226.67	7.11108	59.1787	30.8578	23.5796	protein_coding
ENSG00000109881	CCDC34	33.5193	1.76277	0.29092	6.05931	1.36704e-09	3.07268e-08	10.9071	18.5379	16.9037	10.2371	11.9135	17.9917	3.75356	19.3659	25.8266	67.7279	65.9207	86.027	38.4205	34.7152	58.3109	31.0445	42.5151	43.2292	protein_coding
ENSG00000213903	LTB4R	185.792	1.76223	0.361829	4.87034	1.11405e-06	1.38217e-05	92.7102	113.081	56.049	33.7824	63.7112	86.0472	159.526	71.5695	87.626	104.448	179.495	491.712	650.034	342.047	92.4441	189.178	312.692	218.111	protein_coding
ENSG00000185950	IRS2	552.882	1.76201	0.555828	3.17006	0.00152407	0.00734533	494.091	105.666	181.492	336.801	89.61	125.16	328.436	383.107	222.293	642.191	491.625	134.927	1042.55	24.5048	3158.74	312.386	1280.94	597.349	protein_coding
ENSG00000183520	UTP11L	36.0935	1.76188	0.34749	5.07029	3.97211e-07	5.43481e-06	17.4513	19.4648	20.4623	8.18968	17.6112	12.516	11.2607	10.1039	29.5161	25.2959	50.0362	45.2774	37.3822	34.7152	147.911	38.8057	70.63	53.054	protein_coding
ENSG00000082074	FYB	322.374	1.7615	0.691133	2.54871	0.0108122	0.0371373	282.493	38.0027	185.94	61.4226	204.083	97.7809	76.9479	210.499	164.183	414.527	103.249	376.708	3092.34	216.459	17.0666	97.0142	20.5718	143.442	protein_coding
ENSG00000100034	PPM1F	167.563	1.75914	0.3318	5.30182	1.14651e-07	1.80336e-06	50.1726	65.8096	56.049	102.371	89.61	75.0957	41.2891	93.4613	112.53	77.5198	193.791	345.014	198.333	578.927	93.8663	337.609	270.863	233.831	protein_coding
ENSG00000164284	GRPEL2	7.38555	1.756	0.579461	3.0304	0.0024423	0.0109463	1.09071	0.926896	0	3.07113	9.84157	3.12899	0	2.52598	8.30141	23.664	15.0903	6.33883	4.15357	4.08414	9.95551	12.6118	14.4003	13.7548	protein_coding
ENSG00000105810	CDK6	536.954	1.75412	0.345122	5.0826	3.72298e-07	5.10789e-06	423.195	251.189	247.327	198.6	198.903	251.884	290.901	187.765	161.416	229.296	669.531	1017.84	1283.45	1235.45	197.688	1497.9	462.181	860.654	protein_coding
ENSG00000100890	KIAA0391	23.2477	1.74965	0.396842	4.40894	1.03878e-05	9.98542e-05	10.9071	3.70758	18.683	8.18968	13.9854	14.8627	5.63033	5.05196	12.9133	13.056	36.5343	59.7661	39.4589	31.6521	14.2222	30.0744	19.2004	80.5635	protein_coding
ENSG00000108384	RAD51C	16.9117	1.74867	0.429459	4.0718	4.66504e-05	0.000369007	3.27212	8.34206	14.2347	9.21339	10.3595	3.12899	1.87678	14.3139	3.68952	59.5679	15.0903	39.8441	12.4607	16.3366	36.9776	20.373	13.7146	21.6146	protein_coding
ENSG00000141401	IMPA2	18.165	1.74863	0.514968	3.39561	0.000684754	0.00370516	13.0885	0.926896	7.11733	11.2608	11.9135	4.69348	5.63033	10.9459	9.22379	8.97598	8.73647	28.072	11.4223	96.9983	8.5333	45.5967	28.1148	15.7197	protein_coding
ENSG00000165338	HECTD2	5.33785	1.74682	0.630353	2.77118	0.00558536	0.0217752	1.09071	0.926896	1.77933	6.14226	3.62584	1.56449	0	0.841994	5.53427	17.136	12.7076	9.05548	1.03839	9.18931	4.26665	10.6716	0.685728	9.82482	protein_coding
ENSG00000170836	PPM1D	14.414	1.74609	0.540115	3.23282	0.00122576	0.00612348	7.63496	3.70758	6.22766	7.16597	9.84157	7.82247	3.75356	7.57795	4.6119	28.5599	15.8845	13.5832	5.19197	13.2735	96.7107	6.79099	3.42864	17.6847	protein_coding
ENSG00000126705	AHDC1	222.74	1.74479	0.315477	5.53066	3.19036e-08	5.49523e-07	75.2589	94.5433	101.422	184.268	113.437	94.6519	67.564	91.7774	97.7722	786.622	235.091	199.22	452.739	112.314	186.31	473.429	314.749	328.149	protein_coding
ENSG00000107443	CCNJ	11.5165	1.74355	0.443209	3.93392	8.35706e-05	0.000615704	5.45354	3.70758	3.55866	9.21339	9.84157	1.56449	3.75356	5.05196	4.6119	21.216	12.7076	11.7721	12.4607	15.3155	51.1998	20.373	9.60019	5.89489	protein_coding
ENSG00000122862	SRGN	432.089	1.7408	0.447235	3.89237	9.92692e-05	0.000712511	327.212	64.8827	90.7459	57.3278	246.039	149.409	195.185	252.598	407.692	119.136	733.864	231.82	1677.01	880.132	234.666	713.054	724.815	672.018	protein_coding
ENSG00000065665	SEC61A2	29.6725	1.73989	0.280138	6.21085	5.26978e-10	1.28848e-08	18.542	7.41516	9.78633	28.6639	16.0573	7.82247	13.1374	11.7879	10.1462	52.2239	46.065	45.2774	32.1902	25.5259	61.1553	55.2981	43.8866	49.1241	protein_coding
ENSG00000141349	G6PC3	21.8129	1.73914	0.408999	4.25217	2.11707e-05	0.000184334	4.36283	27.8069	13.345	6.14226	16.0573	7.04023	3.75356	5.89396	4.6119	26.9279	10.3249	37.1275	25.9598	53.0938	22.7555	51.4175	44.5723	31.4394	protein_coding
ENSG00000156026	MCU	25.3795	1.73823	0.497259	3.49561	0.000472971	0.00271972	22.9049	4.63448	11.5657	10.2371	10.3595	11.7337	5.63033	15.9979	11.0685	17.136	23.0325	19.922	8.30715	13.2735	149.333	15.5223	45.2581	60.9139	protein_coding
ENSG00000134109	EDEM1	46.225	1.73807	0.481395	3.61047	0.000305637	0.0018913	34.9027	25.9531	13.345	42.9958	12.4315	21.1207	15.0142	20.2079	5.53427	106.896	84.982	31.6942	13.4991	21.4417	219.021	29.1043	35.6579	98.2482	protein_coding
ENSG00000136867	SLC31A2	18.0491	1.73633	0.635098	2.73395	0.00625789	0.0238047	14.1792	4.63448	5.338	1.02371	7.76966	4.69348	13.1374	12.6299	11.9909	6.52799	1.58845	4.52774	34.267	91.8931	4.26665	65.9697	10.9716	29.4745	protein_coding
ENSG00000129484	PARP2	26.6623	1.7361	0.343683	5.05146	4.38438e-07	5.95555e-06	19.6327	10.1959	11.5657	8.18968	10.3595	9.38697	18.7678	14.3139	9.22379	33.4559	54.0073	72.4438	24.9214	12.2524	46.9331	34.9251	20.5718	68.7738	protein_coding
ENSG00000197780	TAF13	69.8536	1.73512	0.549626	3.1569	0.00159454	0.00761903	44.719	35.222	52.4903	19.4505	18.1292	32.8544	26.2749	30.3118	30.4385	19.584	89.7474	49.8051	153.682	17.3576	530.487	21.3431	36.3436	49.1241	protein_coding
ENSG00000125810	CD93	74.7856	1.73394	0.617035	2.81011	0.00495246	0.0197377	57.8075	14.8303	25.8003	7.16597	61.1213	26.5964	18.7678	18.5239	80.247	63.6479	32.5632	28.9775	163.028	270.574	0	98.9545	312.692	64.8438	protein_coding
ENSG00000260025	AC009414.2	4.46363	1.73201	0.703739	2.46115	0.0138491	0.0453148	2.18142	0.926896	0.889666	1.02371	1.55393	3.12899	5.63033	1.68399	1.84476	0	12.7076	5.43329	7.26875	1.02103	12.7999	3.88057	0.685728	17.6847	lncRNA
ENSG00000132604	TERF2	141.252	1.73136	0.361965	4.78324	1.72493e-06	2.02639e-05	54.5354	50.0524	64.9456	66.5412	79.2505	81.3537	46.9194	63.9916	79.3246	5764.21	133.43	676.444	203.525	138.861	211.91	111.566	61.7155	310.464	protein_coding
ENSG00000162972	C2orf47	7.55341	1.73005	0.467288	3.70233	0.00021363	0.00138762	2.18142	1.85379	5.338	7.16597	3.10786	5.47573	0	3.36798	1.84476	10.608	16.6787	10.8666	10.3839	4.08414	28.4443	5.82085	8.91446	9.82482	protein_coding
ENSG00000168411	RFWD3	55.2021	1.72954	0.373023	4.63655	3.54275e-06	3.82704e-05	13.0885	18.5379	39.1453	29.6876	45.064	17.2094	9.38389	34.5218	21.2147	137.088	110.397	70.6327	35.3054	39.8204	201.955	61.119	60.3441	49.1241	protein_coding
ENSG00000198835	GJC2	3.91139	1.72948	0.594245	2.91038	0.0036099	0.0152692	1.09071	0	0	1.02371	2.58989	2.34674	1.87678	3.36798	3.68952	7.34399	3.1769	9.05548	2.07679	6.12621	12.7999	7.76114	4.11437	1.96496	protein_coding
ENSG00000132141	CCT6B	4.3938	1.72778	0.621091	2.78184	0.00540517	0.0212379	3.27212	3.70758	0.889666	2.04742	1.55393	1.56449	1.87678	0.841994	2.76714	2.448	17.4729	5.43329	10.3839	0	2.84443	8.73128	3.42864	9.82482	protein_coding
ENSG00000276250	AC127024.6	3.5756	1.72699	0.707072	2.44246	0.0145876	0.0473665	2.18142	0.926896	1.77933	3.07113	2.07191	1.56449	1.87678	0	1.84476	12.24	0	3.62219	6.23036	7.14724	1.42222	13.582	4.8001	0	lncRNA
ENSG00000055332	EIF2AK2	237.21	1.72692	0.416853	4.14276	3.43149e-05	0.000281963	150.518	63.0289	97.8633	132.059	128.458	151.756	75.0711	100.197	90.3931	62.8319	309.748	178.393	340.593	766.797	1073.77	162.984	135.774	249.551	protein_coding
ENSG00000183763	TRAIP	4.53288	1.72664	0.693494	2.48977	0.0127826	0.0424217	3.27212	3.70758	1.77933	0	1.03595	4.69348	0	3.36798	0.922379	15.504	20.6498	10.8666	1.03839	2.04207	2.84443	3.88057	2.05718	3.92993	protein_coding
ENSG00000176845	METRNL	57.0435	1.72571	0.48574	3.55275	0.000381232	0.00227755	47.9912	14.8303	21.352	7.16597	17.6112	10.1692	58.1801	41.2577	21.2147	77.5198	100.072	17.2054	96.5706	87.809	258.843	47.537	13.0288	88.4234	protein_coding
ENSG00000097021	ACOT7	11.7686	1.7246	0.554657	3.10931	0.00187526	0.00873283	4.36283	5.56137	3.55866	0	4.66179	3.12899	11.2607	6.73595	11.0685	2.448	33.3574	12.6777	3.11518	40.8414	15.6444	10.6716	32.9149	9.82482	protein_coding
ENSG00000140691	ARMC5	27.1074	1.72365	0.33764	5.10499	3.30812e-07	4.59318e-06	7.63496	10.1959	8.89666	16.3794	18.6472	10.9515	16.891	15.1559	8.30141	23.664	39.7112	19.0165	73.7259	50.0307	82.4886	33.955	26.7434	25.5445	protein_coding
ENSG00000166171	DPCD	6.69538	1.72062	0.510099	3.3731	0.00074326	0.00398446	5.45354	0.926896	0.889666	1.02371	5.17977	3.12899	3.75356	4.20997	3.68952	8.15998	4.76535	7.24438	12.4607	16.3366	1.42222	17.4626	18.5147	5.89489	protein_coding
ENSG00000159840	ZYX	122.571	1.72016	0.3724	4.61913	3.85346e-06	4.12123e-05	102.527	18.5379	45.373	30.7113	79.2505	34.4189	22.5213	77.4635	101.462	151.776	115.957	69.7272	197.295	422.708	216.177	141.641	237.262	141.477	protein_coding
ENSG00000089012	SIRPG	6.9216	1.71922	0.697772	2.46387	0.0137448	0.045048	1.09071	1.85379	6.22766	1.02371	6.21573	1.56449	1.87678	4.20997	4.6119	49.7759	2.38267	8.14993	12.4607	7.14724	0	8.73128	1.37146	5.89489	protein_coding
ENSG00000111684	LPCAT3	20.4981	1.71914	0.316671	5.42878	5.67412e-08	9.33498e-07	8.72566	6.48827	9.78633	16.3794	11.3955	7.04023	15.0142	4.20997	8.30141	49.7759	14.296	30.7886	16.6143	31.6521	32.711	40.746	33.6007	31.4394	protein_coding
ENSG00000204389	HSPA1A	35.7246	1.71877	0.667409	2.57529	0.0100155	0.0349428	6.54425	5.56137	6.22766	4.09484	28.4887	6.25798	56.3033	21.0499	16.6028	84.0478	1.58845	33.5053	8.30715	170.513	110.933	53.3578	4.11437	1772.4	protein_coding
ENSG00000119013	NDUFB3	17.9796	1.71724	0.608051	2.82417	0.00474029	0.0190537	3.27212	0.926896	5.338	25.5928	24.3449	6.25798	0	5.05196	3.68952	97.9198	36.5343	25.3553	21.8063	10.2103	14.2222	22.3133	10.9716	9.82482	protein_coding
ENSG00000160233	LRRC3	10.6919	1.71572	0.62423	2.74854	0.00598622	0.0229864	10.9071	1.85379	2.669	6.14226	4.14382	3.91124	7.50711	6.73595	1.84476	0.815998	33.3574	14.4888	20.7679	49.0097	0	13.582	6.85728	7.85986	protein_coding
ENSG00000102804	TSC22D1	85.481	1.71281	0.435338	3.93443	8.3393e-05	0.000614697	78.531	25.0262	25.8003	16.3794	30.0427	30.5076	50.673	53.8876	47.9637	48.1439	92.9243	113.193	43.6125	57.1779	201.955	106.716	58.2869	457.837	protein_coding
ENSG00000148400	NOTCH1	33.745	1.71087	0.432359	3.95706	7.58771e-05	0.000565954	9.81637	12.0496	21.352	15.3557	21.2371	14.0805	20.6446	14.3139	13.8357	191.76	39.7112	17.2054	46.7277	63.3041	29.8665	34.9251	13.7146	27.5095	protein_coding
ENSG00000146072	TNFRSF21	42.3668	1.7097	0.60308	2.83495	0.00458329	0.0185268	51.2633	22.2455	3.55866	21.4979	6.7337	6.25798	37.5356	20.2079	11.0685	279.887	27.7979	6.33883	10.3839	34.7152	28.4443	67.9099	95.3162	31.4394	protein_coding
ENSG00000126264	HCST	290.85	1.70784	0.386052	4.42385	9.69566e-06	9.39998e-05	110.162	164.987	96.0839	41.9721	123.797	82.9182	326.559	128.825	154.96	309.263	208.087	220.048	321.902	1333.47	263.11	357.012	624.698	367.448	protein_coding
ENSG00000101236	RNF24	92.875	1.70553	0.384547	4.43517	9.20015e-06	8.98912e-05	47.9912	29.6607	32.028	28.6639	38.3303	39.8946	105.1	40.4157	33.2056	32.6399	127.076	56.1439	219.101	323.668	122.311	218.282	67.2013	110.038	protein_coding
ENSG00000173085	COQ2	24.3199	1.70503	0.302334	5.63954	1.70505e-08	3.12668e-07	4.36283	7.41516	11.5657	13.3082	18.6472	7.04023	3.75356	21.8918	11.9909	36.7199	32.5632	59.7661	29.075	42.8835	35.5554	36.8654	32.9149	31.4394	protein_coding
ENSG00000169612	FAM103A1	6.14127	1.70478	0.549755	3.10099	0.00192875	0.00894865	1.09071	0.926896	3.55866	7.16597	4.14382	2.34674	1.87678	3.36798	0.922379	13.056	23.0325	6.33883	2.07679	5.10517	7.11108	3.88057	6.85728	17.6847	protein_coding
ENSG00000165704	HPRT1	28.1472	1.70146	0.326307	5.21429	1.84525e-07	2.73369e-06	13.0885	18.5379	17.7933	14.3319	18.6472	8.60472	3.75356	12.6299	10.1462	31.8239	99.2781	40.7496	23.883	42.8835	21.3332	38.8057	43.2009	47.1591	protein_coding
ENSG00000275713	HIST1H2BH	13.2005	1.69996	0.618065	2.75046	0.00595113	0.0228809	5.45354	2.78069	1.77933	1.02371	5.17977	2.34674	22.5213	3.36798	12.9133	12.24	13.5018	13.5832	5.19197	5.10517	82.4886	4.85071	15.7717	27.5095	protein_coding
ENSG00000110092	CCND1	4.81787	1.69782	0.684907	2.4789	0.0131787	0.0435057	1.09071	2.78069	1.77933	2.04742	0.517977	3.91124	0	3.36798	4.6119	4.89599	5.55957	13.5832	26.9982	7.14724	2.84443	0.970142	0.685728	3.92993	protein_coding
ENSG00000188735	TMEM120B	26.1166	1.69767	0.383904	4.42212	9.77379e-06	9.46962e-05	10.9071	12.9765	10.676	14.3319	13.9854	10.9515	11.2607	18.5239	7.37903	117.504	15.0903	54.3329	39.4589	16.3366	25.5999	39.7758	27.4291	23.5796	protein_coding
ENSG00000112118	MCM3	131.475	1.69512	0.282662	5.99698	2.01018e-09	4.35549e-08	34.9027	72.2978	85.408	53.2329	79.7685	69.62	33.782	56.4136	71.0232	348.431	181.877	379.424	100.724	196.039	108.088	147.462	181.032	167.022	protein_coding
ENSG00000162929	KIAA1841	17.5358	1.69365	0.303549	5.57948	2.41234e-08	4.26256e-07	13.0885	3.70758	6.22766	8.18968	10.8775	6.25798	1.87678	5.89396	16.6028	32.6399	27.0036	21.7331	29.075	32.6731	21.3332	20.373	24.6862	33.4044	protein_coding
ENSG00000165716	FAM69B	62.8141	1.69331	0.553375	3.05996	0.00221365	0.0100625	18.542	48.1986	30.2486	27.6402	25.8989	17.9917	15.0142	46.3097	36.8952	232.56	104.043	78.7826	85.1482	75.5566	145.066	130.969	0	11.7898	protein_coding
ENSG00000080986	NDC80	32.8875	1.69304	0.434499	3.89655	9.75746e-05	0.000703033	49.0819	2.78069	10.676	10.2371	7.76966	20.3384	20.6446	9.26193	10.1462	37.5359	92.1301	38.033	25.9598	24.5048	100.977	33.955	37.0293	60.9139	protein_coding
ENSG00000129473	BCL2L2	4.92871	1.69263	0.595057	2.84448	0.00444835	0.0181126	1.09071	0	2.669	3.07113	3.10786	1.56449	0	1.68399	6.45665	2.448	11.1191	7.24438	5.19197	4.08414	2.84443	7.76114	4.8001	23.5796	protein_coding
ENSG00000196358	NTNG2	20.8861	1.69153	0.620024	2.72817	0.00636873	0.0241515	2.18142	3.70758	8.89666	7.16597	21.755	8.60472	13.1374	17.6819	5.53427	69.3599	9.5307	12.6777	127.722	30.631	1.42222	5.82085	14.4003	15.7197	protein_coding
ENSG00000141030	COPS3	76.7152	1.68965	0.354644	4.76436	1.89451e-06	2.20835e-05	35.9934	32.4413	44.4833	57.3278	35.2224	31.2899	41.2891	32.8378	15.6804	87.3118	173.141	82.4048	58.15	63.3041	348.443	64.9995	66.5156	110.038	protein_coding
ENSG00000116717	GADD45A	61.7618	1.68657	0.583933	2.88829	0.0038734	0.0161835	44.719	23.1724	21.352	17.4031	12.9494	17.2094	22.5213	43.7837	59.9546	47.3279	42.0939	11.7721	17.6527	21.4417	362.665	239.625	13.7146	92.3533	protein_coding
ENSG00000213123	TCTEX1D2	12.3632	1.68571	0.470076	3.58604	0.000335733	0.00205304	2.18142	5.56137	8.007	7.16597	4.66179	7.04023	0	9.26193	8.30141	54.6719	23.8267	15.3943	3.11518	16.3366	9.95551	19.4028	17.8289	9.82482	protein_coding
ENSG00000074696	HACD3	63.1015	1.68514	0.254711	6.61589	3.69325e-11	1.11293e-09	21.8142	31.5144	40.9246	30.7113	27.4528	41.4591	26.2749	35.3638	12.9133	146.064	140.578	75.1604	63.342	95.9773	62.5775	87.3128	70.63	125.758	protein_coding
ENSG00000164039	BDH2	8.24286	1.68029	0.573972	2.92748	0.00341716	0.0145977	3.27212	3.70758	13.345	4.09484	3.10786	1.56449	0	3.36798	1.84476	34.2719	11.1191	9.96102	4.15357	6.12621	5.68887	5.82085	5.48582	31.4394	protein_coding
ENSG00000077147	TM9SF3	253.063	1.67972	0.238581	7.04043	1.91641e-12	7.13292e-11	91.6195	144.596	148.574	91.1102	126.904	108.732	157.649	108.617	106.074	282.335	240.65	391.197	365.514	247.09	766.575	243.506	519.782	414.608	protein_coding
ENSG00000122971	ACADS	33.1779	1.6775	0.385215	4.35472	1.33238e-05	0.000123749	13.0885	19.4648	22.2417	8.18968	17.0932	6.25798	13.1374	18.5239	23.9819	17.136	15.0903	35.3164	56.0732	113.335	39.8221	73.7308	71.3157	33.4044	protein_coding
ENSG00000142798	HSPG2	18.8511	1.67595	0.396913	4.22246	2.41651e-05	0.000206261	5.45354	14.8303	11.5657	2.04742	15.5393	5.47573	15.0142	4.20997	7.37903	22.032	16.6787	40.7496	28.0366	37.7783	8.5333	22.3133	54.1725	27.5095	protein_coding
ENSG00000257167	TMPO-AS1	8.79923	1.67579	0.4649	3.60464	0.00031259	0.00192719	4.36283	4.63448	6.22766	4.09484	5.69775	0.782247	5.63033	4.20997	2.76714	31.0079	6.3538	16.2999	5.19197	15.3155	17.0666	16.4924	10.2859	1.96496	lncRNA
ENSG00000121410	A1BG	58.9024	1.67511	0.443492	3.7771	0.000158667	0.0010699	4.36283	28.7338	17.7933	28.6639	17.0932	14.8627	11.2607	42.9417	85.7813	75.0718	108.015	62.4828	44.6509	55.1359	227.555	38.8057	85.0303	112.003	protein_coding
ENSG00000237499	AL357060.1	56.2685	1.67393	0.366035	4.57316	4.80426e-06	5.00635e-05	29.4491	27.8069	13.345	20.4742	21.2371	12.516	50.673	34.5218	34.128	100.368	53.2131	153.943	195.218	37.7783	52.622	32.9848	67.8871	74.6687	lncRNA
ENSG00000100629	CEP128	18.237	1.67221	0.424943	3.93515	8.31458e-05	0.000613175	18.542	11.1227	11.5657	9.21339	6.21573	6.25798	0	6.73595	7.37903	8.15998	27.7979	42.5607	42.5741	14.2945	32.711	8.73128	23.3148	51.0891	protein_coding
ENSG00000137177	KIF13A	22.98	1.67201	0.548638	3.04756	0.00230708	0.0104148	26.177	9.26896	16.014	10.2371	7.25168	3.12899	13.1374	5.05196	9.22379	35.9039	35.7401	37.1275	75.8027	26.5469	2.84443	56.2682	0.685728	43.2292	protein_coding
ENSG00000134030	CTIF	11.5235	1.67026	0.416365	4.01152	6.03279e-05	0.000462125	8.72566	3.70758	3.55866	6.14226	7.25168	2.34674	3.75356	5.89396	8.30141	42.4319	18.2672	28.072	13.4991	12.2524	7.11108	8.73128	11.6574	15.7197	protein_coding
ENSG00000171155	C1GALT1C1	3.2399	1.66802	0.664267	2.51106	0.0120368	0.0404716	2.18142	0.926896	0	2.04742	4.14382	0	1.87678	0.841994	1.84476	5.71199	2.38267	10.8666	5.19197	6.12621	1.42222	8.73128	2.05718	1.96496	protein_coding
ENSG00000115540	MOB4	68.0701	1.66744	0.363341	4.58919	4.44959e-06	4.67238e-05	33.812	25.9531	31.1383	30.7113	55.4236	24.2497	22.5213	51.3616	16.6028	146.064	130.253	52.5218	50.8813	54.1148	281.599	84.4024	88.4589	45.1942	protein_coding
ENSG00000228716	DHFR	21.9259	1.66721	0.434423	3.83776	0.000124161	0.00086236	2.18142	11.1227	5.338	16.3794	7.25168	17.9917	0	9.26193	23.9819	14.688	69.0976	37.1275	40.4973	20.4207	24.1777	24.2536	47.3152	23.5796	protein_coding
ENSG00000183943	PRKX	308.948	1.66714	0.37588	4.4353	9.19461e-06	8.98912e-05	170.15	120.496	172.595	155.604	126.904	158.014	116.36	117.879	192.777	247.247	746.571	234.537	1080.97	142.945	870.396	152.312	177.604	577.7	protein_coding
ENSG00000139343	SNRPF	79.666	1.66702	0.374798	4.44777	8.67666e-06	8.53868e-05	28.3584	19.4648	45.373	64.4937	45.582	45.3703	7.50711	45.4677	39.6623	232.56	133.43	54.3329	68.534	61.2621	280.177	78.5815	97.3734	86.4584	protein_coding
ENSG00000238005	AL391832.2	7.70531	1.66628	0.662696	2.5144	0.0119235	0.0401735	4.36283	0	2.669	3.07113	1.55393	0.782247	7.50711	4.20997	10.1462	0	15.0903	9.05548	24.9214	27.5679	5.68887	7.76114	12.3431	1.96496	lncRNA
ENSG00000135218	CD36	29.7065	1.66227	0.61239	2.7144	0.00663958	0.0250099	15.2699	6.48827	14.2347	3.07113	40.9202	3.12899	11.2607	6.73595	26.749	45.6959	7.94225	79.6882	31.1518	106.188	18.4888	95.0739	22.629	0	protein_coding
ENSG00000077097	TOP2B	415.55	1.66127	0.272135	6.10458	1.03072e-09	2.37494e-08	195.237	135.327	155.692	281.52	247.075	261.271	138.882	197.027	182.631	1239.5	737.835	452.774	630.305	323.668	901.685	310.445	389.494	699.527	protein_coding
ENSG00000164430	MB21D1	10.5376	1.66044	0.417992	3.97243	7.11445e-05	0.000534366	2.18142	6.48827	7.11733	6.14226	6.7337	8.60472	0	1.68399	4.6119	27.7439	10.3249	12.6777	10.3839	23.4838	25.5999	10.6716	7.54301	17.6847	protein_coding
ENSG00000179965	ZNF771	12.5839	1.65389	0.41036	4.03034	5.56952e-05	0.000430585	2.18142	3.70758	4.44833	4.09484	7.76966	8.60472	15.0142	5.05196	4.6119	13.056	11.9134	15.3943	20.7679	17.3576	52.622	18.4327	11.6574	9.82482	protein_coding
ENSG00000188706	ZDHHC9	27.5401	1.652	0.339265	4.86937	1.11957e-06	1.38788e-05	8.72566	10.1959	15.1243	6.14226	11.3955	12.516	24.3981	13.4719	19.37	22.032	26.2094	84.2159	69.5723	22.4628	27.0221	31.0445	46.6295	45.1942	protein_coding
ENSG00000125148	MT2A	117.37	1.65113	0.426866	3.86803	0.000109719	0.000775304	73.0774	35.222	40.035	36.8536	63.1932	21.9029	58.1801	65.6755	116.22	69.3599	88.9532	61.5772	212.871	612.621	115.2	242.536	2603.02	110.038	protein_coding
ENSG00000173621	LRFN4	6.37888	1.65073	0.494414	3.33875	0.000841549	0.00444013	2.18142	2.78069	0.889666	9.21339	2.07191	3.12899	1.87678	2.52598	3.68952	13.056	8.73647	11.7721	21.8063	6.12621	4.26665	7.76114	10.9716	1.96496	protein_coding
ENSG00000145687	SSBP2	119.56	1.65055	0.295246	5.59041	2.2654e-08	4.05052e-07	51.2633	63.0289	48.9316	74.7308	63.7112	42.2414	52.5498	71.5695	51.6532	295.391	105.632	168.432	223.255	224.628	132.266	298.804	42.5151	141.477	protein_coding
ENSG00000105339	DENND3	230.282	1.64905	0.258316	6.38387	1.72672e-10	4.67831e-09	136.339	105.666	104.091	140.248	97.3797	111.079	123.867	90.0934	95.005	190.944	466.21	565.062	364.476	202.165	118.044	440.445	397.037	396.923	protein_coding
ENSG00000149289	ZC3H12C	4.24138	1.64857	0.675258	2.4414	0.0146305	0.0474853	4.36283	1.85379	0.889666	2.04742	1.55393	3.12899	3.75356	0.841994	0.922379	0.815998	11.1191	4.52774	2.07679	8.16828	0	19.4028	8.91446	1.96496	protein_coding
ENSG00000197536	C5orf56	195.024	1.64658	0.365467	4.50541	6.62444e-06	6.69884e-05	65.4425	97.324	87.1873	135.13	97.3797	92.3052	45.0427	89.2514	140.202	727.055	111.191	337.769	227.408	460.487	56.8887	292.983	278.406	168.987	lncRNA
ENSG00000173846	PLK3	40.7163	1.64601	0.429445	3.83288	0.000126653	0.000878544	20.7235	5.56137	20.4623	16.3794	15.5393	9.38697	24.3981	23.5758	41.5071	20.4	61.1553	45.2774	83.0715	22.4628	186.31	23.2834	60.3441	53.054	protein_coding
ENSG00000177432	NAP1L5	7.76578	1.64594	0.470485	3.49838	0.000468093	0.00269476	1.09071	3.70758	2.669	3.07113	4.66179	3.91124	1.87678	7.57795	4.6119	8.15998	4.76535	8.14993	5.19197	10.2103	17.0666	25.2237	21.9433	5.89489	protein_coding
ENSG00000231889	TRAF3IP2-AS1	10.9242	1.64574	0.502214	3.27696	0.0010493	0.00538144	4.36283	4.63448	5.338	5.11855	4.14382	1.56449	1.87678	9.26193	11.0685	36.7199	17.4729	31.6942	15.5759	5.10517	21.3332	1.94028	9.60019	9.82482	lncRNA
ENSG00000143507	DUSP10	11.4093	1.64509	0.55559	2.96098	0.00306659	0.013285	13.0885	6.48827	2.669	2.04742	3.10786	3.12899	9.38389	8.41994	1.84476	7.34399	16.6787	11.7721	9.34554	5.10517	65.422	20.373	3.42864	15.7197	protein_coding
ENSG00000204248	COL11A2	5.08022	1.64367	0.642733	2.55731	0.0105485	0.0364221	5.45354	3.70758	0	0	0.517977	3.12899	3.75356	3.36798	2.76714	3.26399	4.76535	8.14993	7.26875	7.14724	8.5333	0	17.8289	11.7898	protein_coding
ENSG00000172172	MRPL13	12.7859	1.64338	0.460182	3.57116	0.000355402	0.00215318	4.36283	5.56137	5.338	5.11855	11.3955	15.6449	0	5.89396	0.922379	43.2479	19.0614	27.1664	16.6143	12.2524	15.6444	22.3133	13.7146	5.89489	protein_coding
ENSG00000164442	CITED2	35.855	1.64159	0.52366	3.13484	0.00171947	0.00813759	8.72566	23.1724	18.683	45.0432	9.32359	5.47573	7.50711	17.6819	19.37	42.4319	11.9134	19.0165	28.0366	25.5259	68.2664	51.4175	17.8289	225.971	protein_coding
ENSG00000114204	SERPINI2	12.1903	1.64097	0.658129	2.49339	0.0126528	0.0421024	7.63496	4.63448	2.669	6.14226	4.14382	7.82247	7.50711	6.73595	6.45665	0.815998	2.38267	0.905548	29.075	61.2621	4.26665	34.9251	28.1148	3.92993	protein_coding
ENSG00000121797	CCRL2	8.07562	1.64004	0.458174	3.57951	0.000344242	0.002094	2.18142	2.78069	2.669	4.09484	4.66179	2.34674	7.50711	6.73595	2.76714	10.608	4.76535	6.33883	4.15357	22.4628	15.6444	24.2536	9.60019	11.7898	protein_coding
ENSG00000156042	CFAP70	6.25685	1.63996	0.661916	2.4776	0.0132269	0.0436263	5.45354	5.56137	1.77933	4.09484	2.07191	3.91124	3.75356	0	0.922379	4.07999	6.3538	9.96102	38.4205	3.0631	1.42222	1.94028	4.11437	15.7197	protein_coding
ENSG00000172409	CLP1	4.42221	1.63724	0.645989	2.53447	0.0112618	0.0383826	3.27212	0	0.889666	7.16597	2.07191	3.12899	0	2.52598	0	11.424	11.1191	1.8111	3.11518	5.10517	15.6444	2.91043	5.48582	3.92993	protein_coding
ENSG00000106327	TFR2	7.18382	1.63674	0.64417	2.54085	0.0110582	0.0378344	3.27212	6.48827	0.889666	1.02371	5.69775	8.60472	3.75356	0.841994	0.922379	24.48	7.14802	22.6387	1.03839	8.16828	7.11108	20.373	6.85728	0	protein_coding
ENSG00000149269	PAK1	104.463	1.63454	0.362768	4.50575	6.61379e-06	6.69708e-05	31.6305	39.8565	47.1523	44.0195	52.8337	39.8946	93.8389	56.4136	54.4204	90.5758	198.556	90.5548	144.337	351.236	257.421	193.058	63.087	31.4394	protein_coding
ENSG00000168214	RBPJ	282.768	1.63251	0.337456	4.83769	1.31355e-06	1.60324e-05	155.971	119.57	114.767	160.722	100.488	123.595	161.403	165.031	138.357	149.328	423.322	470.885	268.944	248.111	550.398	252.237	201.604	1285.09	protein_coding
ENSG00000197747	S100A10	117.854	1.63215	0.656524	2.48605	0.012917	0.0427826	105.799	46.3448	87.1873	18.4268	79.7685	34.4189	41.2891	39.5737	64.5665	45.6959	50.8304	16.2999	14.5375	1090.47	66.8442	149.402	152.232	17.6847	protein_coding
ENSG00000008441	NFIX	76.8745	1.63144	0.36816	4.43134	9.36514e-06	9.1148e-05	26.177	43.5641	35.5866	26.6165	34.7045	28.9432	75.0711	34.5218	35.0504	77.5198	67.5091	94.1769	320.864	149.071	49.7776	182.387	58.9726	43.2292	protein_coding
ENSG00000123297	TSFM	9.22752	1.63002	0.445066	3.66243	0.000249829	0.00158912	4.36283	4.63448	5.338	3.07113	7.76966	7.04023	0	5.05196	1.84476	26.9279	13.5018	9.96102	8.30715	4.08414	22.7555	11.6417	21.9433	7.85986	protein_coding
ENSG00000197128	ZNF772	14.3585	1.62826	0.606554	2.68444	0.00726505	0.0269641	6.54425	5.56137	3.55866	11.2608	10.8775	13.2982	0	5.89396	5.53427	106.896	7.14802	11.7721	12.4607	13.2735	2.84443	24.2536	5.48582	11.7898	protein_coding
ENSG00000130775	THEMIS2	62.3235	1.62656	0.415288	3.9167	8.97683e-05	0.000653362	74.1682	12.9765	24.9107	51.1855	30.0427	8.60472	9.38389	47.9937	14.7581	154.224	173.935	52.5218	99.6857	106.188	75.3775	55.2981	34.2864	96.2833	protein_coding
ENSG00000011566	MAP4K3	37.4639	1.62629	0.442772	3.67298	0.000239742	0.00153622	29.4491	12.0496	9.78633	12.2845	7.76966	21.1207	41.2891	21.8918	11.0685	12.24	104.043	38.9385	63.342	10.2103	100.977	39.7758	41.8294	96.2833	protein_coding
ENSG00000136111	TBC1D4	22.0367	1.62541	0.588655	2.76123	0.00575835	0.0222879	38.1748	0.926896	7.11733	4.09484	6.7337	3.12899	5.63033	15.9979	15.6804	30.1919	38.917	59.7661	17.6527	2.04207	19.911	9.70142	83.6588	37.3343	protein_coding
ENSG00000185885	IFITM1	5.5846	1.6254	0.648956	2.50463	0.0122578	0.0410605	1.09071	0	5.338	11.2608	3.10786	1.56449	0	0.841994	0.922379	5.71199	13.5018	3.62219	8.30715	13.2735	4.26665	14.5521	1.37146	11.7898	protein_coding
ENSG00000160298	C21orf58	49.42	1.62402	0.347171	4.67787	2.89863e-06	3.20727e-05	23.9956	22.2455	15.1243	24.569	33.6685	26.5964	26.2749	32.8378	12.9133	72.6239	50.0362	176.582	47.7661	128.65	19.911	70.8204	61.7155	43.2292	protein_coding
ENSG00000182117	NOP10	61.5701	1.62386	0.45391	3.57749	0.00034691	0.00210767	9.81637	20.3917	27.5797	61.4226	63.1932	29.7254	0	37.0477	19.37	160.752	76.2456	67.9161	42.5741	41.8624	88.1774	81.4919	66.5156	214.181	protein_coding
ENSG00000044115	CTNNA1	41.0366	1.62364	0.342205	4.74465	2.08863e-06	2.4048e-05	16.3606	8.34206	15.1243	18.4268	20.7191	11.7337	18.7678	30.3118	40.5847	73.4399	42.0939	57.0495	89.3018	20.4207	83.9108	27.164	84.3445	80.5635	protein_coding
ENSG00000107331	ABCA2	52.0411	1.62158	0.412928	3.92704	8.59985e-05	0.00063081	26.177	24.0993	15.1243	21.4979	25.8989	14.0805	63.8104	26.9438	14.7581	43.2479	117.545	122.249	103.839	126.608	18.4888	63.0592	13.0288	96.2833	protein_coding
ENSG00000278535	NA_113	7.29085	1.62147	0.499403	3.24682	0.00116704	0.00588685	0	1.85379	1.77933	8.18968	5.69775	7.04023	3.75356	0.841994	2.76714	13.056	11.1191	24.4498	6.23036	9.18931	5.68887	13.582	6.17155	9.82482	protein_coding
ENSG00000086065	CHMP5	38.6168	1.62122	0.463993	3.49405	0.000475746	0.00273046	14.1792	7.41516	17.7933	37.8773	33.6685	21.1207	0	16.8399	19.37	111.792	22.2383	39.8441	30.1134	69.4304	136.533	36.8654	17.1432	62.8789	protein_coding
ENSG00000165806	CASP7	21.7222	1.61999	0.390737	4.14597	3.38373e-05	0.000278363	13.0885	2.78069	10.676	8.18968	16.5753	11.7337	9.38389	14.3139	7.37903	42.4319	36.5343	28.9775	10.3839	24.5048	56.8887	21.3431	10.9716	64.8438	protein_coding
ENSG00000237940	LINC01238	22.8384	1.61829	0.637909	2.53687	0.0111849	0.0381464	15.2699	2.78069	5.338	21.4979	16.5753	17.2094	7.50711	10.1039	4.6119	116.688	5.55957	7.24438	119.415	15.3155	11.3777	21.3431	3.42864	9.82482	lncRNA
ENSG00000161533	ACOX1	67.4882	1.61739	0.305529	5.29374	1.19837e-07	1.86349e-06	26.177	32.4413	27.5797	27.6402	30.5607	22.6852	39.4123	51.3616	41.5071	95.4718	34.9459	174.771	177.565	108.23	38.3998	108.656	85.0303	92.3533	protein_coding
ENSG00000132912	DCTN4	122.826	1.61434	0.449637	3.59032	0.000330275	0.0020213	121.069	47.2717	32.9176	44.0195	37.8123	49.2816	120.114	48.8357	45.1966	27.7439	158.051	49.8051	192.103	155.197	230.399	623.801	130.974	96.2833	protein_coding
ENSG00000179222	MAGED1	93.237	1.61395	0.424005	3.80644	0.000140981	0.000966367	25.0863	41.7103	40.9246	79.8494	64.7471	51.6283	24.3981	33.6798	49.8085	344.351	243.827	91.4603	33.2286	62.2831	76.7997	109.626	35.6579	269.2	protein_coding
ENSG00000144597	EAF1	21.9832	1.61336	0.388645	4.15125	3.30666e-05	0.00027335	23.9956	3.70758	9.78633	10.2371	13.4674	12.516	3.75356	7.57795	11.0685	43.2479	48.4477	17.2054	25.9598	9.18931	51.1998	42.6863	16.4575	45.1942	protein_coding
ENSG00000105355	PLIN3	307.642	1.61111	0.24866	6.47915	9.2239e-11	2.61205e-09	106.889	140.888	163.699	108.513	154.357	125.16	253.365	162.505	154.037	341.903	261.3	488.09	473.507	680.009	308.621	856.635	473.152	284.92	protein_coding
ENSG00000135749	PCNXL2	49.12	1.6104	0.291841	5.51805	3.42777e-08	5.86386e-07	28.3584	12.0496	25.8003	18.4268	22.273	15.6449	52.5498	24.4178	22.1371	36.7199	58.7726	59.7661	42.5741	119.461	86.7552	110.596	69.2585	78.5986	protein_coding
ENSG00000260589	STAM-AS1	5.65633	1.60905	0.649094	2.47891	0.0131783	0.0435057	2.18142	0	0.889666	3.07113	1.55393	3.12899	7.50711	2.52598	4.6119	0	11.1191	9.05548	8.30715	5.10517	5.68887	4.85071	2.74291	29.4745	lncRNA
ENSG00000109670	FBXW7	990.445	1.60586	0.444817	3.61016	0.000306008	0.00189204	574.803	466.228	464.406	409.484	363.102	426.325	786.37	459.729	459.345	1251.74	551.192	640.222	599.153	907.7	982.752	6403.91	277.72	1803.84	protein_coding
ENSG00000196843	ARID5A	239.48	1.60467	0.538236	2.98135	0.00286982	0.0125665	155.971	67.6634	64.9456	49.1381	55.4236	35.2011	501.1	69.8855	71.0232	79.9678	643.322	125.871	164.066	204.207	1129.24	122.238	390.179	381.203	protein_coding
ENSG00000140743	CDR2	20.8912	1.60423	0.552504	2.90357	0.00368937	0.0155267	9.81637	13.9034	13.345	13.3082	8.28763	4.69348	7.50711	6.73595	14.7581	21.216	31.769	4.52774	13.4991	14.2945	157.866	10.6716	8.22874	21.6146	protein_coding
ENSG00000155380	SLC16A1	63.4072	1.60393	0.309724	5.17858	2.2358e-07	3.2496e-06	27.2677	27.8069	47.1523	23.5453	28.4887	22.6852	50.673	33.6798	23.0595	56.3039	121.516	98.7047	85.1482	30.631	191.999	65.9697	139.889	66.8088	protein_coding
ENSG00000025156	HSF2	85.915	1.60307	0.391302	4.09677	4.18963e-05	0.000334925	45.8097	29.6607	35.5866	67.5649	33.6685	40.6769	35.6588	62.3076	31.3609	115.056	266.065	101.421	72.6875	29.61	281.599	32.9848	76.1158	188.637	protein_coding
ENSG00000175087	PDIK1L	5.09144	1.60167	0.598107	2.67789	0.00740871	0.0273252	0	2.78069	0.889666	5.11855	2.58989	3.91124	0	2.52598	4.6119	28.5599	5.55957	6.33883	3.11518	4.08414	4.26665	5.82085	7.54301	3.92993	protein_coding
ENSG00000083635	NUFIP1	40.28	1.5996	0.427899	3.73827	0.000185293	0.00122742	7.63496	22.2455	24.021	19.4505	22.791	25.8142	7.50711	34.5218	13.8357	55.4879	50.0362	33.5053	29.075	36.7572	233.243	31.0445	46.6295	31.4394	protein_coding
ENSG00000136868	SLC31A1	14.0715	1.59883	0.395034	4.04733	5.18057e-05	0.000404677	3.27212	4.63448	5.338	4.09484	8.28763	7.04023	3.75356	6.73595	18.4476	12.24	19.8556	30.7886	11.4223	30.631	42.6665	14.5521	15.7717	13.7548	protein_coding
ENSG00000198642	KLHL9	41.6296	1.59818	0.443866	3.6006	0.000317482	0.00195335	8.72566	20.3917	31.1383	18.4268	32.1146	20.3384	15.0142	26.9438	11.9909	152.592	3.97112	41.6552	31.1518	76.5776	88.1774	95.0739	37.715	37.3343	protein_coding
ENSG00000109458	GAB1	106.394	1.59734	0.389838	4.09746	4.17716e-05	0.000334106	40.3562	60.2482	94.3046	59.3752	37.2944	26.5964	60.0569	50.5196	47.9637	434.927	158.051	198.315	21.8063	114.356	81.0663	202.76	83.6588	143.442	protein_coding
ENSG00000226471	Z93930.2	36.6233	1.59704	0.442356	3.6103	0.000305846	0.00189182	21.8142	25.9531	10.676	15.3557	13.4674	4.69348	30.0284	10.1039	32.2833	17.136	53.2131	55.2384	57.1116	27.5679	31.2888	112.536	13.0288	127.723	lncRNA
ENSG00000213096	ZNF254	17.0236	1.59661	0.428761	3.72378	0.000196258	0.0012887	20.7235	6.48827	3.55866	14.3319	11.9135	7.82247	1.87678	6.73595	1.84476	48.1439	38.917	19.922	28.0366	11.2314	24.1777	13.582	13.7146	33.4044	protein_coding
ENSG00000167613	LAIR1	373.546	1.59446	0.337312	4.72694	2.27923e-06	2.58046e-05	87.2566	177.037	298.928	173.007	266.758	174.441	101.346	204.605	188.165	706.655	208.087	580.456	706.107	709.619	182.044	728.577	1008.71	222.041	protein_coding
ENSG00000123374	CDK2	101.135	1.59427	0.265089	6.01408	1.80916e-09	3.9668e-08	31.6305	38.9296	32.9176	47.0907	44.546	38.3301	101.346	72.4115	50.7308	262.751	157.256	191.071	89.3018	133.756	163.555	126.118	152.232	86.4584	protein_coding
ENSG00000198554	WDHD1	12.9759	1.59421	0.415109	3.84045	0.00012281	0.000853368	10.9071	5.56137	5.338	5.11855	6.21573	1.56449	1.87678	8.41994	11.9909	20.4	35.7401	21.7331	12.4607	11.2314	18.4888	11.6417	7.54301	37.3343	protein_coding
ENSG00000115129	TP53I3	14.969	1.59318	0.458868	3.47198	0.000516632	0.00293376	4.36283	3.70758	4.44833	4.09484	10.3595	12.516	16.891	3.36798	8.30141	21.216	3.97112	25.3553	26.9982	35.7362	2.84443	24.2536	31.5435	29.4745	protein_coding
ENSG00000186767	SPIN4	33.298	1.59178	0.396285	4.01675	5.90071e-05	0.000454089	8.72566	19.4648	17.7933	11.2608	21.755	13.2982	9.38389	19.3659	27.6714	129.744	44.4766	40.7496	16.6143	51.0517	21.3332	95.0739	26.0577	25.5445	protein_coding
ENSG00000168395	ING5	106.132	1.59059	0.428606	3.71108	0.000206378	0.00134809	57.8075	57.4675	64.9456	55.2803	41.4382	60.233	41.2891	42.9417	53.498	41.6159	176.318	55.2384	296.98	61.2621	453.687	66.9398	39.7722	243.656	protein_coding
ENSG00000152582	SPEF2	12.1323	1.58753	0.496957	3.1945	0.00140071	0.00684737	7.63496	12.9765	6.22766	0	7.76966	6.25798	1.87678	5.05196	5.53427	2.448	12.7076	15.3943	41.5357	22.4628	18.4888	26.1938	6.17155	19.6496	protein_coding
ENSG00000158106	RHPN1	21.876	1.58284	0.453123	3.49318	0.000477303	0.00273835	16.3606	7.41516	8.007	10.2371	16.0573	7.82247	16.891	10.1039	6.45665	39.1679	19.8556	8.14993	57.1116	51.0517	19.911	80.5218	6.85728	11.7898	protein_coding
ENSG00000123131	PRDX4	17.899	1.58016	0.397585	3.97439	7.05609e-05	0.000531309	7.63496	9.26896	5.338	14.3319	12.9494	11.7337	3.75356	5.89396	9.22379	18.768	57.1842	30.7886	7.26875	36.7572	7.11108	24.2536	36.3436	23.5796	protein_coding
ENSG00000116212	LRRC42	14.0657	1.57884	0.38042	4.15024	3.32122e-05	0.000274402	7.63496	6.48827	9.78633	3.07113	11.3955	8.60472	0	6.73595	8.30141	42.4319	24.621	16.2999	10.3839	22.4628	22.7555	22.3133	24.0005	5.89489	protein_coding
ENSG00000163794	UCN	20.1249	1.57681	0.459416	3.43221	0.000598681	0.0033132	3.27212	18.5379	10.676	6.14226	9.32359	10.9515	9.38389	12.6299	10.1462	31.8239	12.7076	40.7496	22.8447	77.5986	1.42222	45.5967	24.6862	13.7548	protein_coding
ENSG00000159403	C1R	5.18535	1.57595	0.615345	2.56108	0.0104348	0.0361288	4.36283	0.926896	4.44833	6.14226	2.58989	0.782247	1.87678	0.841994	1.84476	28.5599	4.76535	2.71664	6.23036	3.0631	1.42222	8.73128	6.17155	7.85986	protein_coding
ENSG00000143126	CELSR2	7.4725	1.5741	0.567041	2.77599	0.00550334	0.0215392	4.36283	4.63448	3.55866	1.02371	8.28763	4.69348	1.87678	1.68399	2.76714	13.056	16.6787	34.4108	7.26875	4.08414	7.11108	3.88057	1.37146	13.7548	protein_coding
ENSG00000198689	SLC9A6	17.3301	1.57008	0.446615	3.51551	0.000438915	0.00255714	4.36283	4.63448	10.676	23.5453	7.76966	7.04023	3.75356	8.41994	8.30141	48.9599	62.7438	30.7886	18.6911	11.2314	11.3777	9.70142	14.4003	25.5445	protein_coding
ENSG00000185215	TNFAIP2	49.1968	1.5691	0.464928	3.37493	0.00073834	0.00396091	37.0841	2.78069	15.1243	9.21339	41.4382	20.3384	5.63033	33.6798	56.2651	17.952	85.7763	54.3329	93.4554	141.924	66.8442	98.9545	28.1148	76.6336	protein_coding
ENSG00000060642	PIGV	9.48191	1.56821	0.607577	2.58109	0.0098489	0.0344494	0	4.63448	10.676	0	8.80561	3.91124	1.87678	4.20997	8.30141	23.664	3.97112	14.4888	13.4991	25.5259	2.84443	32.0147	10.2859	1.96496	protein_coding
ENSG00000137642	SORL1	226.698	1.56819	0.39003	4.02069	5.8028e-05	0.00044747	130.885	74.1516	129.891	136.153	107.739	82.136	82.5782	148.191	137.434	479.807	295.452	231.82	260.637	797.428	51.1998	659.697	108.345	167.022	protein_coding
ENSG00000111445	RFC5	19.4935	1.56658	0.397125	3.9448	7.98666e-05	0.000592478	4.36283	7.41516	14.2347	15.3557	9.32359	6.25798	3.75356	10.9459	16.6028	75.8878	37.3286	23.5442	10.3839	26.5469	29.8665	14.5521	28.8006	15.7197	protein_coding
ENSG00000139618	BRCA2	43.1543	1.56603	0.431386	3.63024	0.000283159	0.00176968	37.0841	15.7572	19.5727	10.2371	15.5393	11.7337	54.4266	23.5758	11.0685	13.872	150.108	97.7991	22.8447	56.1569	102.4	33.955	53.4868	47.1591	protein_coding
ENSG00000273230	AC102953.2	11.2283	1.56581	0.427922	3.6591	0.000253099	0.00160506	6.54425	7.41516	3.55866	9.21339	6.21573	4.69348	7.50711	2.52598	4.6119	33.4559	20.6498	26.2609	6.23036	26.5469	4.26665	13.582	10.9716	7.85986	lncRNA
ENSG00000164466	SFXN1	64.3913	1.5644	0.502032	3.11614	0.00183238	0.00856763	30.5398	24.0993	46.2626	27.6402	32.6326	35.2011	16.891	40.4157	38.7399	164.832	310.542	77.8771	8.30715	26.5469	9.95551	56.2682	74.7444	137.548	protein_coding
ENSG00000165948	IFI27L1	14.6042	1.56422	0.358633	4.36161	1.29108e-05	0.000120659	4.36283	9.26896	4.44833	13.3082	6.21573	7.82247	0	11.7879	8.30141	18.768	38.1228	28.9775	14.5375	10.2103	18.4888	27.164	25.3719	15.7197	protein_coding
ENSG00000132357	CARD6	9.47287	1.56306	0.423852	3.68774	0.000226258	0.00145893	6.54425	0.926896	3.55866	2.04742	8.28763	4.69348	5.63033	5.05196	5.53427	2.448	13.5018	15.3943	21.8063	16.3366	9.95551	15.5223	11.6574	21.6146	protein_coding
ENSG00000115539	PDCL3	9.5973	1.56285	0.538152	2.90411	0.00368303	0.0155087	7.63496	2.78069	2.669	1.02371	3.62584	7.04023	1.87678	9.26193	6.45665	7.34399	27.0036	4.52774	14.5375	3.0631	24.1777	4.85071	7.54301	37.3343	protein_coding
ENSG00000056050	C4orf27	21.7786	1.56017	0.4458	3.49971	0.000465767	0.00268445	2.18142	17.611	10.676	14.3319	18.6472	10.1692	0	9.26193	14.7581	73.4399	15.0903	66.105	13.4991	28.589	15.6444	27.164	25.3719	29.4745	protein_coding
ENSG00000162129	CLPB	7.33393	1.55844	0.617962	2.5219	0.0116723	0.0394647	1.09071	2.78069	1.77933	0	6.7337	4.69348	7.50711	9.26193	0	4.07999	11.1191	9.96102	8.30715	24.5048	1.42222	13.582	21.2576	3.92993	protein_coding
ENSG00000102265	TIMP1	72.6143	1.55803	0.512189	3.04191	0.00235085	0.0105838	79.6217	18.5379	19.5727	7.16597	40.4022	10.9515	46.9194	42.0997	66.4113	17.952	200.145	41.6552	48.8045	206.249	38.3998	37.8355	172.118	212.216	protein_coding
ENSG00000152520	PAN3	290.798	1.55333	0.259476	5.98641	2.14519e-09	4.59504e-08	179.967	151.084	139.678	194.505	108.775	158.796	129.498	177.661	90.3931	235.008	795.019	714.477	449.624	253.217	365.51	323.057	272.92	495.171	protein_coding
ENSG00000130755	GMFG	535.904	1.55332	0.265786	5.84423	5.08916e-09	1.02581e-07	229.049	230.797	250.886	332.706	321.146	276.916	73.1943	378.897	354.194	1303.15	987.221	775.149	423.664	765.776	521.953	854.695	631.556	935.323	protein_coding
ENSG00000136068	FLNB	162.866	1.55273	0.409493	3.79184	0.000149538	0.00101517	103.617	76.0054	89.8563	97.2525	76.1426	79.007	71.3176	75.7795	76.5575	46.5119	185.054	426.513	76.8411	505.412	126.577	605.369	107.659	106.108	protein_coding
ENSG00000225697	SLC26A6	21.0573	1.55194	0.454828	3.41216	0.000644513	0.00352804	16.3606	9.26896	9.78633	3.07113	7.25168	9.38697	13.1374	13.4719	15.6804	66.9119	11.1191	29.8831	35.3054	69.4304	2.84443	15.5223	32.9149	17.6847	protein_coding
ENSG00000128487	SPECC1	41.8814	1.55004	0.327775	4.72897	2.2566e-06	2.55902e-05	30.5398	12.0496	20.4623	6.14226	15.0213	25.0319	16.891	24.4178	40.5847	19.584	67.5091	78.7826	57.1116	52.0728	61.1553	46.5668	83.6588	96.2833	protein_coding
ENSG00000136807	CDK9	17.8911	1.54989	0.416421	3.72194	0.000197697	0.00129646	18.542	10.1959	5.338	6.14226	5.17977	4.69348	7.50711	6.73595	17.5252	6.52799	36.5343	38.9385	28.0366	10.2103	41.2443	20.373	15.086	43.2292	protein_coding
ENSG00000184635	ZNF93	7.67135	1.54905	0.608257	2.5467	0.0108747	0.0372998	4.36283	0	4.44833	6.14226	4.66179	7.04023	1.87678	4.20997	1.84476	13.872	13.5018	4.52774	17.6527	6.12621	39.8221	3.88057	4.11437	0	protein_coding
ENSG00000106992	AK1	41.8866	1.54895	0.270156	5.73352	9.83654e-09	1.88423e-07	21.8142	19.4648	20.4623	19.4505	25.8989	22.6852	31.9052	13.4719	17.5252	78.3358	40.5055	98.7047	84.1099	37.7783	69.6886	31.0445	42.5151	78.5986	protein_coding
ENSG00000184445	KNTC1	29.9645	1.54688	0.311338	4.9685	6.74718e-07	8.78418e-06	26.177	13.9034	17.7933	22.5216	10.3595	12.516	3.75356	14.3139	15.6804	71.8079	21.4441	55.2384	73.7259	36.7572	45.5109	30.0744	36.3436	31.4394	protein_coding
ENSG00000122378	FAM213A	32.9487	1.54634	0.400304	3.86292	0.00011204	0.000788371	23.9956	13.9034	15.1243	13.3082	12.9494	25.0319	20.6446	4.20997	23.0595	78.3358	53.2131	70.6327	100.724	17.3576	55.4664	29.1043	14.4003	21.6146	protein_coding
ENSG00000167088	SNRPD1	211.445	1.54443	0.234018	6.5996	4.12278e-11	1.22518e-09	51.2633	113.081	119.215	133.082	163.163	117.337	65.6872	144.823	59.9546	320.687	381.228	369.463	190.026	292.016	288.71	250.297	378.522	367.448	protein_coding
ENSG00000067560	RHOA	812.184	1.54349	0.302421	5.1038	3.32908e-07	4.61803e-06	368.659	297.533	403.019	598.87	437.691	314.463	137.005	522.036	652.122	669.935	2053.07	824.954	675.994	1044.52	2268.44	818.8	1256.94	1275.26	protein_coding
ENSG00000170385	SLC30A1	9.16514	1.54258	0.443986	3.4744	0.000512005	0.00291298	3.27212	3.70758	3.55866	5.11855	6.21573	2.34674	9.38389	6.73595	2.76714	21.216	16.6787	8.14993	3.11518	4.08414	19.911	11.6417	23.3148	13.7548	protein_coding
ENSG00000101367	MAPRE1	53.3103	1.54222	0.424597	3.6322	0.000281012	0.00175832	18.542	12.0496	34.697	52.2092	26.4168	27.3787	11.2607	25.2598	35.9728	120.768	74.6571	34.4108	74.7643	38.7993	253.155	26.1938	30.172	62.8789	protein_coding
ENSG00000104728	ARHGEF10	26.6869	1.53971	0.518859	2.96749	0.00300242	0.0130446	22.9049	16.6841	17.7933	8.18968	9.32359	10.9515	24.3981	7.57795	6.45665	22.848	77.0398	131.304	20.7679	5.10517	7.11108	12.6118	30.172	49.1241	protein_coding
ENSG00000112339	HBS1L	99.8268	1.53955	0.324952	4.73777	2.1608e-06	2.46428e-05	77.4403	58.3944	35.5866	49.1381	43.5101	59.4508	60.0569	43.7837	33.2056	66.0959	121.516	97.7991	84.1099	243.006	112.355	373.505	76.8015	161.127	protein_coding
ENSG00000140545	MFGE8	27.822	1.53635	0.319223	4.81277	1.48851e-06	1.78206e-05	18.542	11.1227	19.5727	7.16597	9.32359	11.7337	28.1517	19.3659	6.45665	47.3279	47.6535	52.5218	20.7679	44.9255	24.1777	67.9099	26.7434	37.3343	protein_coding
ENSG00000181751	C5orf30	6.15117	1.53497	0.588887	2.60656	0.00914563	0.032427	2.18142	0.926896	5.338	5.11855	5.17977	1.56449	1.87678	3.36798	2.76714	15.504	9.5307	9.96102	0	1.02103	8.5333	17.4626	16.4575	3.92993	protein_coding
ENSG00000152926	ZNF117	43.6163	1.53374	0.347889	4.4087	1.03991e-05	9.98542e-05	31.6305	25.0262	10.676	27.6402	13.9854	21.9029	26.2749	37.0477	8.30141	107.712	71.4802	57.0495	102.801	32.6731	100.977	33.955	28.8006	47.1591	protein_coding
ENSG00000232229	LINC00865	65.997	1.53352	0.426123	3.59878	0.000319713	0.00196466	15.2699	37.0758	21.352	29.6876	38.8483	49.2816	13.1374	70.7275	28.5938	166.464	37.3286	129.493	91.3786	96.9983	12.7999	227.013	73.3729	49.1241	lncRNA
ENSG00000132326	PER2	29.9476	1.53326	0.585793	2.61741	0.00885986	0.0315805	17.4513	12.0496	16.014	14.3319	9.32359	27.3787	7.50711	5.89396	27.6714	10.608	57.1842	22.6387	68.534	4.08414	196.266	6.79099	13.7146	21.6146	protein_coding
ENSG00000198363	ASPH	41.6315	1.53206	0.495023	3.09493	0.00196859	0.00909703	14.1792	31.5144	19.5727	23.5453	31.5966	21.1207	31.9052	5.89396	13.8357	7.34399	46.8593	96.8936	66.4572	88.83	1.42222	118.357	80.9159	49.1241	protein_coding
ENSG00000137124	ALDH1B1	10.3869	1.53202	0.606847	2.52455	0.0115845	0.0391982	1.09071	6.48827	8.007	2.04742	11.9135	3.91124	3.75356	5.89396	4.6119	13.056	1.58845	24.4498	19.7295	19.3997	0	21.3431	37.715	1.96496	protein_coding
ENSG00000183010	PYCR1	12.4246	1.53022	0.543654	2.81469	0.00488239	0.0195101	6.54425	7.41516	6.22766	8.18968	7.76966	10.1692	7.50711	2.52598	1.84476	4.89599	17.4729	32.5997	6.23036	13.2735	21.3332	10.6716	58.9726	0	protein_coding
ENSG00000184232	OAF	10.206	1.53019	0.39324	3.89122	9.97415e-05	0.000714537	8.72566	1.85379	4.44833	5.11855	6.7337	4.69348	0	10.1039	4.6119	29.3759	12.7076	17.2054	17.6527	17.3576	5.68887	12.6118	13.0288	11.7898	protein_coding
ENSG00000166902	MRPL16	37.1996	1.52968	0.518527	2.95004	0.00317731	0.0137133	9.81637	12.0496	16.014	26.6165	18.1292	19.5562	0	11.7879	57.1875	50.5919	53.2131	21.7331	208.717	22.4628	39.8221	40.746	19.8861	41.2643	protein_coding
ENSG00000263731	AC145207.5	9.84087	1.52812	0.414128	3.68996	0.000224289	0.00144748	8.72566	6.48827	2.669	1.02371	5.17977	6.25798	1.87678	5.05196	8.30141	21.216	11.1191	11.7721	8.30715	15.3155	18.4888	12.6118	28.8006	3.92993	lncRNA
ENSG00000196535	MYO18A	196.986	1.52724	0.274801	5.55761	2.7349e-08	4.78751e-07	75.2589	114.935	110.319	63.47	112.401	96.2164	152.019	85.0414	105.151	319.055	135.812	584.078	455.855	205.228	193.421	284.252	160.46	292.78	protein_coding
ENSG00000105173	CCNE1	9.30405	1.52624	0.530604	2.87642	0.00402212	0.0166788	7.63496	5.56137	4.44833	4.09484	2.58989	1.56449	15.0142	5.05196	0	11.424	18.2672	10.8666	9.34554	18.3786	2.84443	27.164	21.2576	1.96496	protein_coding
ENSG00000198056	PRIM1	7.23278	1.52427	0.476362	3.1998	0.00137521	0.00673812	4.36283	3.70758	0.889666	2.04742	5.17977	7.82247	1.87678	2.52598	4.6119	11.424	16.6787	19.0165	3.11518	3.0631	15.6444	10.6716	11.6574	5.89489	protein_coding
ENSG00000196689	TRPV1	11.6104	1.52277	0.475895	3.1998	0.00137523	0.00673812	5.45354	5.56137	7.11733	7.16597	4.66179	7.04023	9.38389	5.89396	2.76714	39.9839	7.94225	18.111	40.4973	9.18931	2.84443	21.3431	6.17155	7.85986	protein_coding
ENSG00000143819	EPHX1	4.39848	1.5221	0.596226	2.55289	0.0106832	0.0367973	1.09071	0.926896	0	3.07113	2.58989	3.12899	1.87678	5.89396	1.84476	9.79198	4.76535	4.52774	7.26875	7.14724	1.42222	18.4327	3.42864	1.96496	protein_coding
ENSG00000166532	RIMKLB	152.241	1.52203	0.32669	4.65894	3.17848e-06	3.48613e-05	75.2589	78.7861	54.2696	88.0391	59.5674	93.8697	112.607	86.7254	59.0323	292.127	212.058	136.738	127.722	115.377	655.642	161.044	103.545	227.936	protein_coding
ENSG00000167487	KLHL26	15.2843	1.52192	0.45177	3.36879	0.000754984	0.00404442	2.18142	11.1227	5.338	5.11855	10.3595	8.60472	1.87678	16.8399	8.30141	26.9279	23.0325	13.5832	15.5759	15.3155	48.3554	4.85071	45.9438	11.7898	protein_coding
ENSG00000213186	TRIM59	6.38199	1.52129	0.523397	2.90657	0.00365418	0.0154132	1.09071	4.63448	1.77933	3.07113	6.21573	3.91124	0	6.73595	0.922379	24.48	11.9134	5.43329	4.15357	11.2314	4.26665	7.76114	5.48582	11.7898	protein_coding
ENSG00000113583	C5orf15	26.2325	1.52112	0.525065	2.89701	0.00376737	0.0157984	16.3606	0.926896	14.2347	29.6876	23.309	21.9029	1.87678	11.7879	0.922379	104.448	48.4477	31.6942	28.0366	20.4207	42.6665	34.9251	13.0288	27.5095	protein_coding
ENSG00000260442	ATP2A1-AS1	10.8847	1.52083	0.438206	3.47059	0.000519325	0.00294018	5.45354	4.63448	2.669	8.18968	6.7337	3.12899	1.87678	3.36798	13.8357	29.3759	19.0614	24.4498	13.4991	5.10517	12.7999	5.82085	12.3431	23.5796	lncRNA
ENSG00000119403	PHF19	53.5877	1.51997	0.261083	5.82181	5.82148e-09	1.16098e-07	27.2677	29.6607	15.1243	18.4268	27.4528	18.7739	52.5498	22.7338	41.5071	65.2799	111.986	52.5218	47.7661	104.146	78.2219	90.2232	98.0591	62.8789	protein_coding
ENSG00000176809	LRRC37A3	4.97797	1.51929	0.589539	2.57708	0.00996378	0.0347703	2.18142	2.78069	0.889666	2.04742	3.10786	0.782247	5.63033	1.68399	4.6119	5.71199	11.1191	9.05548	3.11518	8.16828	22.7555	1.94028	2.05718	1.96496	protein_coding
ENSG00000149923	PPP4C	8.98624	1.51858	0.549643	2.76285	0.00572999	0.0222239	7.63496	5.56137	3.55866	9.21339	5.69775	3.12899	0	2.52598	3.68952	20.4	16.6787	7.24438	20.7679	1.02103	35.5554	5.82085	3.42864	9.82482	protein_coding
ENSG00000147166	ITGB1BP2	7.15285	1.51692	0.591804	2.56321	0.0103708	0.0359487	5.45354	1.85379	5.338	4.09484	2.07191	5.47573	0	2.52598	5.53427	7.34399	8.73647	25.3553	2.07679	11.2314	1.42222	1.94028	6.85728	31.4394	protein_coding
ENSG00000175970	UNC119B	24.0429	1.5163	0.328081	4.62172	3.8058e-06	4.07896e-05	7.63496	4.63448	17.7933	11.2608	15.5393	13.2982	15.0142	16.8399	10.1462	68.5439	28.5921	32.5997	18.6911	23.4838	48.3554	53.3578	25.3719	21.6146	protein_coding
ENSG00000125505	MBOAT7	191.649	1.5163	0.402541	3.76681	0.000165347	0.00111195	100.345	111.227	60.4973	44.0195	125.35	85.265	236.474	46.3097	86.7036	118.32	95.307	152.132	234.677	772.923	349.865	423.952	282.52	123.793	protein_coding
ENSG00000126860	EVI2A	28.2612	1.51608	0.391666	3.87084	0.000108459	0.00076676	10.9071	10.1959	16.014	30.7113	25.8989	4.69348	1.87678	10.9459	18.4476	84.8638	24.621	38.033	38.4205	28.589	69.6886	26.1938	25.3719	43.2292	protein_coding
ENSG00000102158	MAGT1	76.0597	1.51568	0.38419	3.94513	7.97558e-05	0.000591949	65.4425	28.7338	42.704	27.6402	29.5247	31.2899	61.9337	31.9958	35.9728	48.1439	205.704	106.855	50.8813	47.9886	243.199	49.4772	49.3724	212.216	protein_coding
ENSG00000247746	USP51	9.13703	1.51552	0.503838	3.00795	0.00263012	0.0116458	8.72566	2.78069	6.22766	2.04742	4.66179	4.69348	3.75356	6.73595	2.76714	4.89599	20.6498	34.4108	6.23036	8.16828	4.26665	20.373	3.42864	19.6496	protein_coding
ENSG00000182481	KPNA2	48.434	1.51478	0.442823	3.42074	0.000624504	0.00343351	34.9027	25.9531	11.5657	34.8061	18.6472	17.9917	39.4123	23.5758	20.2923	79.9678	84.982	49.8051	15.5759	32.6731	250.31	28.1341	81.6016	21.6146	protein_coding
ENSG00000120254	MTHFD1L	18.3415	1.51415	0.314302	4.81752	1.45355e-06	1.74577e-05	13.0885	7.41516	8.89666	2.04742	12.4315	11.7337	3.75356	13.4719	10.1462	13.056	34.9459	28.072	21.8063	26.5469	38.3998	31.0445	19.8861	33.4044	protein_coding
ENSG00000100294	MCAT	8.50136	1.51328	0.502373	3.01226	0.00259311	0.0115014	4.36283	5.56137	4.44833	1.02371	6.21573	0.782247	1.87678	6.73595	8.30141	17.136	3.97112	16.2999	2.07679	14.2945	7.11108	20.373	22.629	9.82482	protein_coding
ENSG00000109685	WHSC1	160.6	1.51304	0.262826	5.75682	8.57119e-09	1.65662e-07	107.98	50.0524	58.718	109.537	74.0707	82.9182	110.73	98.5133	59.9546	308.447	376.463	354.069	176.527	133.756	115.2	166.864	220.119	286.885	protein_coding
ENSG00000169813	HNRNPF	138.83	1.51207	0.329978	4.58233	4.59832e-06	4.81511e-05	54.5354	30.5876	77.401	115.679	113.437	70.4023	33.782	85.8834	64.5665	447.983	139.784	190.165	130.838	149.071	379.732	129.029	113.145	172.917	protein_coding
ENSG00000137547	MRPL15	35.0017	1.51062	0.307634	4.91045	9.08662e-07	1.14622e-05	6.54425	15.7572	16.014	24.569	23.309	16.4272	28.1517	21.8918	11.9909	34.2719	60.3611	56.1439	22.8447	35.7362	44.0887	45.5967	101.488	64.8438	protein_coding
ENSG00000156127	BATF	14.7476	1.51059	0.563452	2.68096	0.00734117	0.027136	1.09071	10.1959	1.77933	6.14226	10.3595	4.69348	13.1374	7.57795	14.7581	39.1679	5.55957	18.111	36.3438	44.9255	0	13.582	30.172	7.85986	protein_coding
ENSG00000110841	PPFIBP1	59.3815	1.509	0.42527	3.54832	0.000387693	0.00231064	23.9956	31.5144	28.4693	51.1855	21.2371	32.0721	24.3981	39.5737	24.9042	69.3599	84.982	56.1439	146.413	37.7783	264.532	85.3725	9.60019	37.3343	protein_coding
ENSG00000175643	RMI2	13.9172	1.50894	0.529524	2.84961	0.00437722	0.0178908	5.45354	5.56137	10.676	10.2371	10.8775	9.38697	1.87678	6.73595	3.68952	58.7519	11.1191	48.8996	4.15357	14.2945	1.42222	19.4028	10.2859	17.6847	protein_coding
ENSG00000196782	MAML3	54.966	1.5067	0.405429	3.71631	0.000202153	0.00132377	39.2655	27.8069	25.8003	21.4979	21.2371	21.1207	16.891	30.3118	51.6532	22.032	97.6896	82.4048	85.1482	18.3786	75.3775	43.6564	57.6012	251.515	protein_coding
ENSG00000135446	CDK4	77.3504	1.50272	0.310292	4.84294	1.27934e-06	1.56657e-05	25.0863	41.7103	43.5936	62.4463	53.8696	29.7254	13.1374	49.6777	42.4294	261.935	72.2745	112.288	91.3786	91.8931	115.2	123.208	117.259	45.1942	protein_coding
ENSG00000123240	OPTN	112.947	1.50266	0.341707	4.39749	1.09508e-05	0.000104617	63.2611	37.0758	68.5043	60.3989	55.4236	50.8461	88.2086	47.9937	58.1099	81.5998	127.87	122.249	106.955	84.7459	432.354	162.014	65.1442	320.289	protein_coding
ENSG00000093010	COMT	88.9066	1.50242	0.313789	4.788	1.68452e-06	1.98357e-05	30.5398	34.2951	40.9246	79.8494	70.4449	43.8059	26.2749	47.1517	43.3518	234.192	88.9532	208.276	121.492	132.735	56.8887	192.088	96.0019	53.054	protein_coding
ENSG00000104679	R3HCC1	33.5995	1.50179	0.336161	4.46746	7.91523e-06	7.85619e-05	11.9978	25.0262	15.1243	18.4268	24.3449	14.8627	9.38389	19.3659	18.4476	17.952	32.5632	75.1604	43.6125	51.0517	21.3332	59.1787	107.659	39.2993	protein_coding
ENSG00000137343	ATAT1	30.3302	1.49934	0.440982	3.39999	0.000673874	0.00366343	3.27212	13.9034	13.345	30.7113	21.2371	13.2982	5.63033	25.2598	14.7581	146.064	20.6498	25.3553	41.5357	27.5679	38.3998	40.746	15.086	49.1241	protein_coding
ENSG00000140854	KATNB1	22.5462	1.49925	0.40965	3.65983	0.000252381	0.00160129	2.18142	9.26896	17.7933	25.5928	7.76966	11.7337	1.87678	21.8918	6.45665	33.4559	22.2383	29.8831	26.9982	19.3997	81.0663	31.0445	33.6007	23.5796	protein_coding
ENSG00000102390	PBDC1	55.593	1.49662	0.354672	4.21972	2.44603e-05	0.000208338	23.9956	19.4648	45.373	23.5453	35.2224	33.6366	18.7678	32.8378	26.749	48.9599	150.903	109.571	37.3822	41.8624	115.2	22.3133	59.6583	155.232	protein_coding
ENSG00000153317	ASAP1	249.665	1.49527	0.38883	3.84556	0.000120279	0.000840447	174.513	100.105	121.884	169.936	106.185	112.644	118.237	141.455	130.978	184.416	282.744	591.323	90.3402	208.291	1250.13	176.566	184.461	349.764	protein_coding
ENSG00000256073	URB1-AS1	5.00773	1.49517	0.556303	2.6877	0.00719461	0.0267455	1.09071	1.85379	2.669	6.14226	1.55393	3.91124	1.87678	2.52598	1.84476	6.52799	21.4441	4.52774	3.11518	7.14724	2.84443	3.88057	3.42864	13.7548	lncRNA
ENSG00000164758	MED30	22.1318	1.49404	0.51518	2.90004	0.00373118	0.0156764	13.0885	8.34206	3.55866	20.4742	12.9494	17.2094	0	13.4719	13.8357	26.9279	58.7726	32.5997	14.5375	8.16828	102.4	6.79099	15.7717	29.4745	protein_coding
ENSG00000149657	LSM14B	74.0456	1.49299	0.431665	3.45867	0.000542859	0.00305615	42.5376	30.5876	44.4833	42.9958	37.8123	57.8863	20.6446	28.6278	42.4294	87.3118	29.3863	17.2054	158.874	80.6617	379.732	98.9545	81.6016	51.0891	protein_coding
ENSG00000161513	FDXR	12.3347	1.49226	0.397745	3.75181	0.00017556	0.0011712	2.18142	10.1959	6.22766	6.14226	9.32359	7.82247	3.75356	6.73595	5.53427	17.952	14.296	24.4498	26.9982	25.5259	5.68887	9.70142	33.6007	5.89489	protein_coding
ENSG00000196712	NF1	139.524	1.49182	0.323579	4.61036	4.01965e-06	4.28373e-05	97.073	59.3213	56.049	66.5412	58.0134	67.2733	187.678	40.4157	31.3609	83.2318	112.78	244.498	299.057	243.006	177.777	313.356	175.546	198.461	protein_coding
ENSG00000100596	SPTLC2	223.056	1.49114	0.310094	4.80868	1.51927e-06	1.81455e-05	113.434	115.862	118.326	168.912	118.099	108.732	82.5782	117.037	110.685	606.287	113.574	400.252	355.13	569.737	99.5551	323.057	318.864	174.882	protein_coding
ENSG00000163923	RPL39L	6.32923	1.48745	0.508444	2.92551	0.00343896	0.0146825	4.36283	4.63448	2.669	0	2.58989	4.69348	0	5.05196	5.53427	16.32	7.14802	14.4888	2.07679	8.16828	9.95551	3.88057	16.4575	5.89489	protein_coding
ENSG00000111843	TMEM14C	9.47131	1.48654	0.47148	3.15293	0.00161639	0.0077063	4.36283	3.70758	1.77933	11.2608	9.32359	4.69348	5.63033	3.36798	0.922379	32.6399	10.3249	18.111	10.3839	13.2735	2.84443	18.4327	9.60019	9.82482	protein_coding
ENSG00000104671	DCTN6	32.3889	1.48645	0.416127	3.5721	0.000354124	0.0021463	42.5376	7.41516	22.2417	28.6639	9.32359	10.9515	9.38389	16.8399	5.53427	25.2959	57.9784	52.5218	59.1884	12.2524	82.4886	32.9848	28.8006	78.5986	protein_coding
ENSG00000170545	SMAGP	63.965	1.48587	0.266301	5.57965	2.41004e-08	4.26256e-07	20.7235	40.7834	39.1453	36.8536	33.1505	28.9432	37.5356	28.6278	37.8175	57.1199	73.0687	121.343	78.9179	46.9676	63.9997	101.865	188.575	115.933	protein_coding
ENSG00000184900	SUMO3	861.274	1.4857	0.324206	4.58258	4.59271e-06	4.81258e-05	347.936	485.693	317.611	432.006	363.62	316.81	855.811	392.369	570.953	461.039	3076.83	2019.37	884.711	1178.27	622.931	766.412	1261.05	1149.5	protein_coding
ENSG00000135316	SYNCRIP	547.597	1.48558	0.264081	5.62549	1.84985e-08	3.36351e-07	306.489	254.896	403.019	278.449	276.6	278.48	236.474	298.066	259.189	483.887	1142.1	805.937	696.762	372.678	1777.77	459.847	598.641	927.463	protein_coding
ENSG00000197771	MCMBP	23.0866	1.48404	0.28767	5.15883	2.48502e-07	3.55878e-06	10.9071	11.1227	14.2347	10.2371	18.6472	10.9515	7.50711	12.6299	11.9909	58.7519	35.7401	53.4273	30.1134	26.5469	24.1777	17.4626	33.6007	27.5095	protein_coding
ENSG00000181222	POLR2A	244.214	1.48306	0.238272	6.22424	4.83895e-10	1.18507e-08	82.8938	140.888	123.664	146.391	165.235	130.635	67.564	168.399	128.211	385.151	367.726	421.08	267.905	281.806	718.219	227.983	269.491	302.605	protein_coding
ENSG00000124802	EEF1E1	15.9988	1.48262	0.325093	4.5606	5.10071e-06	5.28596e-05	5.45354	8.34206	8.89666	3.07113	14.5034	7.82247	13.1374	7.57795	7.37903	33.4559	26.2094	38.9385	15.5759	23.4838	12.7999	25.2237	16.4575	19.6496	protein_coding
ENSG00000219626	FAM228B	72.5087	1.48062	0.285916	5.17851	2.23671e-07	3.2496e-06	33.812	32.4413	58.718	50.1618	43.5101	51.6283	18.7678	31.1538	22.1371	60.3839	200.145	120.438	117.338	83.7248	49.7776	127.089	78.173	125.758	protein_coding
ENSG00000134986	NREP	78.832	1.48023	0.36865	4.01528	5.93763e-05	0.000456463	37.0841	39.8565	32.028	71.6597	54.9056	40.6769	24.3981	50.5196	23.0595	231.744	96.1012	102.327	50.8813	248.111	46.9331	152.312	82.9731	33.4044	protein_coding
ENSG00000168404	MLKL	49.5155	1.47938	0.484701	3.05214	0.00227216	0.0102818	22.9049	30.5876	30.2486	11.2608	38.8483	19.5562	41.2891	20.2079	21.2147	19.584	8.73647	73.3494	60.2268	188.891	11.3777	111.566	146.06	35.3694	protein_coding
ENSG00000175279	APITD1	11.7678	1.47897	0.394154	3.75225	0.000175254	0.00116968	7.63496	6.48827	8.89666	12.2845	5.69775	4.69348	1.87678	4.20997	4.6119	24.48	31.769	25.3553	11.4223	10.2103	15.6444	10.6716	21.9433	3.92993	protein_coding
ENSG00000142583	SLC2A5	39.5095	1.47871	0.384834	3.84245	0.000121813	0.000847615	17.4513	20.3917	17.7933	25.5928	28.4887	17.2094	16.891	20.2079	23.0595	24.48	51.6246	114.099	15.5759	62.2831	9.95551	106.716	54.8582	84.4935	protein_coding
ENSG00000113369	ARRDC3	75.6538	1.47653	0.415511	3.55354	0.000380087	0.00227251	23.9956	54.6868	32.9176	51.1855	43.5101	25.8142	7.50711	57.2556	59.9546	70.1759	63.538	72.4438	34.267	62.2831	85.333	156.193	93.259	367.448	protein_coding
ENSG00000138758	SEPT11	165.722	1.47558	0.296619	4.97466	6.53623e-07	8.54655e-06	116.706	77.8592	100.532	51.1855	59.0494	75.0957	125.744	99.3553	84.8589	75.0718	155.668	354.975	473.507	206.249	182.044	273.58	159.089	312.429	protein_coding
ENSG00000162461	SLC25A34	9.1017	1.47322	0.476366	3.09263	0.0019839	0.00914994	2.18142	3.70758	2.669	2.04742	9.84157	5.47573	7.50711	5.05196	4.6119	26.1119	7.14802	19.0165	3.11518	19.3997	24.1777	9.70142	6.17155	5.89489	protein_coding
ENSG00000090013	BLVRB	71.0219	1.47246	0.454373	3.24063	0.00119265	0.00598595	26.177	28.7338	61.387	27.6402	59.5674	14.0805	30.0284	31.9958	59.0323	236.64	57.1842	195.598	34.267	131.713	38.3998	189.178	39.0865	17.6847	protein_coding
ENSG00000104660	LEPROTL1	51.9893	1.47067	0.265695	5.53517	3.10935e-08	5.36801e-07	50.1726	16.6841	18.683	13.3082	30.0427	20.3384	18.7678	33.6798	46.119	88.1278	111.986	65.1994	57.1116	91.8931	61.1553	64.9995	76.8015	70.7387	protein_coding
ENSG00000157800	SLC37A3	25.8769	1.47062	0.378049	3.89001	0.000100238	0.000717413	8.72566	11.1227	14.2347	25.5928	16.5753	12.516	11.2607	17.6819	5.53427	42.4319	76.2456	44.3718	24.9214	53.0938	12.7999	39.7758	9.60019	39.2993	protein_coding
ENSG00000275964	AL355001.2	10.185	1.4697	0.43385	3.38758	0.000705132	0.00380038	3.27212	6.48827	6.22766	6.14226	5.69775	7.04023	3.75356	2.52598	7.37903	34.2719	3.97112	21.7331	12.4607	16.3366	4.26665	20.373	9.60019	11.7898	lncRNA
ENSG00000132341	RAN	400.742	1.46505	0.276555	5.29748	1.1741e-07	1.83143e-06	169.06	156.645	221.527	384.915	233.608	191.651	193.308	212.183	154.96	798.046	708.448	454.585	273.097	396.161	1206.04	377.385	694.643	387.098	protein_coding
ENSG00000140044	JDP2	78.9517	1.46248	0.439995	3.32385	0.00088785	0.00465178	52.354	42.6372	34.697	14.3319	56.4595	22.6852	52.5498	42.9417	59.9546	6.52799	52.4188	55.2384	123.569	101.082	149.333	128.059	304.463	121.828	protein_coding
ENSG00000165233	C9orf89	71.0639	1.46243	0.246886	5.9235	3.15158e-09	6.57287e-08	46.9004	16.6841	29.359	31.735	35.2224	25.0319	56.3033	47.1517	54.4204	54.6719	127.87	81.4993	104.878	128.65	113.777	79.5517	127.545	117.898	protein_coding
ENSG00000128928	IVD	59.272	1.4589	0.317029	4.60178	4.18896e-06	4.43275e-05	37.0841	18.5379	21.352	30.7113	40.9202	18.7739	33.782	42.0997	41.5071	112.608	36.5343	85.1215	91.3786	130.692	18.4888	100.895	104.231	102.178	protein_coding
ENSG00000204839	MROH6	17.0599	1.45876	0.528059	2.76249	0.00573626	0.0222252	16.3606	8.34206	13.345	10.2371	14.5034	3.12899	11.2607	3.36798	1.84476	31.8239	11.1191	42.5607	19.7295	56.1569	0	33.955	11.6574	17.6847	protein_coding
ENSG00000108352	RAPGEFL1	7.52114	1.45795	0.435751	3.34583	0.000820373	0.00434364	4.36283	5.56137	0.889666	2.04742	7.25168	3.12899	1.87678	5.05196	4.6119	5.71199	5.55957	13.5832	18.6911	11.2314	5.68887	17.4626	8.91446	13.7548	protein_coding
ENSG00000123179	EBPL	24.7958	1.45601	0.299506	4.86138	1.1657e-06	1.4415e-05	8.72566	7.41516	12.4553	15.3557	20.7191	15.6449	13.1374	15.9979	9.22379	39.9839	32.5632	32.5997	42.5741	41.8624	29.8665	69.8502	22.629	15.7197	protein_coding
ENSG00000125962	ARMCX5	16.6457	1.45593	0.394162	3.69374	0.000220977	0.00142856	11.9978	12.9765	9.78633	5.11855	12.4315	8.60472	1.87678	11.7879	3.68952	31.0079	41.2997	32.5997	15.5759	14.2945	5.68887	16.4924	19.2004	45.1942	protein_coding
ENSG00000233654	AC108047.1	4.66164	1.45532	0.526802	2.76255	0.00573519	0.0222252	1.09071	2.78069	4.44833	3.07113	1.03595	2.34674	3.75356	0	4.6119	2.448	7.94225	9.05548	9.34554	5.10517	11.3777	8.73128	4.8001	1.96496	lncRNA
ENSG00000112096	SOD2	179.88	1.45402	0.425656	3.41596	0.000635575	0.00348546	129.794	50.0524	54.2696	70.636	83.9123	117.337	76.9479	119.563	161.416	85.6798	151.697	97.7991	292.827	78.6197	657.064	317.236	87.7732	605.209	protein_coding
ENSG00000136824	SMC2	106.71	1.45214	0.284023	5.11274	3.17514e-07	4.44135e-06	79.6217	49.1255	62.2766	61.4226	59.5674	82.9182	26.2749	57.2556	33.2056	56.3039	240.65	220.048	127.722	90.8721	127.999	152.312	165.26	227.936	protein_coding
ENSG00000137802	MAPKBP1	137.046	1.45146	0.385414	3.76597	0.000165901	0.00111418	69.8053	96.3971	71.1733	55.2803	70.9629	90.7407	103.223	60.6236	43.3518	22.032	102.455	112.288	360.322	141.924	226.132	250.297	460.124	129.688	protein_coding
ENSG00000175334	BANF1	310.046	1.44831	0.357006	4.05681	4.97476e-05	0.000390629	69.8053	192.794	145.905	113.632	211.853	147.845	153.896	255.124	205.691	509.999	222.383	799.599	301.134	588.116	86.7552	906.113	426.523	243.656	protein_coding
ENSG00000198951	NAGA	13.4551	1.44486	0.505236	2.85977	0.0042395	0.0174512	6.54425	3.70758	7.11733	9.21339	10.3595	3.12899	1.87678	12.6299	10.1462	13.056	13.5018	14.4888	12.4607	63.3041	4.26665	24.2536	30.172	1.96496	protein_coding
ENSG00000139505	MTMR6	64.9994	1.44454	0.497406	2.90414	0.00368258	0.0155087	51.2633	17.611	39.1453	59.3752	15.5393	30.5076	28.1517	46.3097	25.8266	33.4559	97.6896	24.4498	82.0331	30.631	433.776	40.746	32.9149	80.5635	protein_coding
ENSG00000197119	SLC25A29	44.6096	1.44374	0.490367	2.9442	0.00323795	0.013939	16.3606	16.6841	9.78633	18.4268	26.9348	38.3301	37.5356	31.9958	20.2923	105.264	30.9748	67.9161	39.4589	161.323	19.911	110.596	2.05718	49.1241	protein_coding
ENSG00000152465	NMT2	76.128	1.44311	0.515458	2.79966	0.00511563	0.0202911	63.2611	26.88	47.1523	36.8536	29.5247	42.2414	41.2891	37.8897	43.3518	70.9919	223.177	94.1769	279.328	10.2103	183.466	11.6417	10.9716	117.898	protein_coding
ENSG00000143198	MGST3	38.1524	1.44106	0.402051	3.58428	0.000338012	0.00206299	20.7235	15.7572	52.4903	25.5928	9.84157	17.2094	15.0142	17.6819	11.0685	113.424	108.015	49.8051	24.9214	37.7783	59.7331	64.9995	17.1432	25.5445	protein_coding
ENSG00000154727	GABPA	14.0639	1.44074	0.530324	2.71672	0.00659318	0.0248624	8.72566	3.70758	4.44833	7.16597	11.9135	15.6449	1.87678	8.41994	5.53427	34.2719	63.538	17.2054	17.6527	1.02103	22.7555	14.5521	6.85728	7.85986	protein_coding
ENSG00000196562	SULF2	25.4503	1.4399	0.593533	2.42598	0.0152673	0.0491379	32.7212	7.41516	15.1243	4.09484	19.6831	5.47573	16.891	10.1039	11.0685	20.4	28.5921	16.2999	6.23036	80.6617	4.26665	24.2536	5.48582	149.337	protein_coding
ENSG00000213551	DNAJC9	54.776	1.43472	0.281189	5.10235	3.35461e-07	4.6406e-06	37.0841	29.6607	24.021	36.8536	24.8629	35.2011	30.0284	33.6798	15.6804	128.112	135.812	93.2714	39.4589	45.9466	51.1998	51.4175	75.4301	98.2482	protein_coding
ENSG00000002549	LAP3	58.0254	1.43456	0.419102	3.42294	0.000619469	0.00340957	39.2655	35.222	16.9037	13.3082	40.4022	29.7254	39.4123	23.5758	44.2742	18.768	45.2708	62.4828	78.9179	232.796	183.466	40.746	66.5156	33.4044	protein_coding
ENSG00000136950	ARPC5L	192.574	1.43311	0.431806	3.31887	0.000903819	0.00472228	99.2544	114.935	104.091	133.082	89.0921	67.2733	91.9621	101.039	135.59	116.688	714.802	115.005	183.796	81.6828	876.085	94.1038	117.945	229.901	protein_coding
ENSG00000146094	DOK3	152.024	1.43298	0.362037	3.95809	7.555e-05	0.000564468	99.2544	62.102	66.725	91.1102	111.883	82.136	33.782	57.2556	134.667	666.671	178.701	235.442	175.488	112.314	79.6441	279.401	146.06	123.793	protein_coding
ENSG00000196230	NA_3	1439.63	1.43047	0.31538	4.5357	5.74127e-06	5.88089e-05	418.832	802.692	620.987	468.859	635.04	472.477	1869.27	657.597	1071.8	2900.06	4232.42	2696.72	1580.43	1605.07	1624.17	1245.66	1232.94	1778.29	protein_coding
ENSG00000185614	FAM212A	23.038	1.42991	0.365379	3.91349	9.09732e-05	0.000660852	5.45354	19.4648	11.5657	10.2371	18.6472	9.38697	24.3981	9.26193	5.53427	64.4639	13.5018	34.4108	38.4205	41.8624	12.7999	40.746	32.9149	21.6146	protein_coding
ENSG00000156374	PCGF6	4.61851	1.42979	0.543602	2.63021	0.00853325	0.0306532	2.18142	0.926896	2.669	6.14226	3.62584	0.782247	3.75356	2.52598	0	12.24	7.14802	7.24438	8.30715	5.10517	5.68887	2.91043	2.05718	9.82482	protein_coding
ENSG00000182871	COL18A1	14.155	1.42788	0.55929	2.55302	0.0106794	0.0367973	10.9071	4.63448	6.22766	2.04742	6.7337	2.34674	5.63033	0	30.4385	26.1119	33.3574	27.1664	9.34554	27.5679	5.68887	13.582	9.60019	33.4044	protein_coding
ENSG00000162664	ZNF326	210.421	1.42731	0.414202	3.44593	0.000569104	0.00317891	161.425	118.643	88.9666	96.2287	99.4516	143.934	114.483	100.197	102.384	44.8799	538.484	180.204	289.712	78.6197	843.374	155.223	159.775	471.591	protein_coding
ENSG00000152270	PDE3B	52.0523	1.42548	0.502013	2.83953	0.004518	0.0183389	51.2633	29.6607	28.4693	26.6165	19.6831	15.6449	26.2749	15.1559	40.5847	8.15998	47.6535	35.3164	205.602	27.5679	98.1329	24.2536	24.6862	212.216	protein_coding
ENSG00000173598	NUDT4	128.928	1.42369	0.423008	3.36562	0.000763705	0.00408532	56.7168	75.0785	85.408	76.7783	52.3157	54.7573	99.4692	76.6215	54.4204	93.8398	123.899	94.1769	37.3822	55.1359	294.399	413.281	496.467	80.5635	protein_coding
ENSG00000177663	IL17RA	356.375	1.41916	0.409199	3.46814	0.000524067	0.00296479	217.051	209.478	218.858	109.537	223.766	150.191	204.569	156.611	256.421	212.16	150.108	1132.84	592.923	437.003	92.4441	246.416	1356.37	448.012	protein_coding
ENSG00000221829	FANCG	18.7882	1.41887	0.382918	3.70541	0.00021105	0.0013739	6.54425	10.1959	14.2347	19.4505	14.5034	5.47573	7.50711	10.9459	2.76714	66.0959	11.9134	28.072	28.0366	21.4417	29.8665	15.5223	24.0005	21.6146	protein_coding
ENSG00000130396	MLLT4	50.0774	1.41823	0.511334	2.77359	0.00554409	0.021648	33.812	25.0262	21.352	29.6876	21.755	28.1609	37.5356	40.4157	8.30141	152.592	148.52	28.9775	0	87.809	38.3998	69.8502	32.9149	96.2833	protein_coding
ENSG00000095261	PSMD5	19.6454	1.41793	0.40162	3.53053	0.000414735	0.00243894	8.72566	3.70758	6.22766	16.3794	11.3955	14.8627	1.87678	19.3659	11.9909	58.7519	32.5632	19.0165	14.5375	14.2945	52.622	19.4028	16.4575	31.4394	protein_coding
ENSG00000149485	FADS1	34.2995	1.4163	0.523157	2.70722	0.00678489	0.0254373	41.4469	7.41516	3.55866	11.2608	16.5753	7.04023	26.2749	41.2577	13.8357	38.3519	81.8051	51.6162	121.492	29.61	28.4443	10.6716	6.17155	80.5635	protein_coding
ENSG00000182511	FES	52.3905	1.41562	0.391684	3.61418	0.000301299	0.00186599	23.9956	35.222	7.11733	23.5453	20.7191	41.4591	33.782	37.8897	34.128	39.9839	32.5632	65.1994	78.9179	220.543	25.5999	94.1038	85.0303	43.2292	protein_coding
ENSG00000138346	DNA2	5.59968	1.41553	0.553297	2.55836	0.0105166	0.036366	4.36283	0	0.889666	4.09484	2.07191	3.91124	7.50711	5.05196	0	9.79198	6.3538	5.43329	5.19197	3.0631	12.7999	5.82085	4.8001	19.6496	protein_coding
ENSG00000126759	CFP	130.995	1.41491	0.576141	2.45584	0.0140556	0.0458569	133.066	30.5876	59.6076	19.4505	115.509	36.7656	58.1801	59.7816	130.055	29.3759	65.9207	98.7047	96.5706	976.109	19.911	174.626	165.26	88.4234	protein_coding
ENSG00000158042	MRPL17	14.3557	1.41407	0.446939	3.1639	0.0015567	0.00748103	7.63496	7.41516	8.007	6.14226	15.5393	7.04023	11.2607	3.36798	4.6119	33.4559	15.8845	28.9775	5.19197	40.8414	2.84443	29.1043	21.2576	9.82482	protein_coding
ENSG00000119392	GLE1	116.036	1.41308	0.332492	4.24996	2.13805e-05	0.000185945	53.4447	60.2482	78.2906	102.371	69.4089	50.8461	15.0142	56.4136	83.0141	406.367	161.228	174.771	146.413	54.1148	123.733	182.387	162.518	108.073	protein_coding
ENSG00000151135	TMEM263	90.9165	1.41245	0.322119	4.38486	1.16061e-05	0.000110246	47.9912	63.0289	50.711	31.735	46.6179	38.3301	63.8104	57.2556	48.8861	248.879	292.275	119.532	95.5322	102.103	66.8442	110.596	38.4008	113.968	protein_coding
ENSG00000157657	ZNF618	162.179	1.41229	0.342737	4.12061	3.77865e-05	0.000306635	91.6195	95.4702	60.4973	90.0865	84.9483	69.62	127.621	114.511	65.4889	104.448	251.769	332.336	379.014	182.765	71.1108	248.356	482.753	66.8088	protein_coding
ENSG00000136295	TTYH3	83.7662	1.41128	0.338808	4.16543	3.10768e-05	0.000258463	43.6283	27.8069	29.359	79.8494	56.9775	43.0236	37.5356	51.3616	42.4294	332.111	163.61	61.5772	53.9964	92.9142	105.244	127.089	61.0298	98.2482	protein_coding
ENSG00000109180	OCIAD1	214.864	1.41036	0.335183	4.20773	2.57946e-05	0.000218397	78.531	87.1282	146.795	207.813	139.336	125.16	16.891	145.665	106.996	583.439	274.008	345.919	219.101	174.597	459.376	230.894	174.175	351.729	protein_coding
ENSG00000130544	ZNF557	32.346	1.40841	0.341839	4.1201	3.78711e-05	0.000306826	10.9071	19.4648	35.5866	23.5453	20.7191	21.1207	1.87678	16.8399	7.37903	89.7598	65.1264	28.9775	35.3054	38.7993	32.711	52.3877	40.458	41.2643	protein_coding
ENSG00000173207	CKS1B	91.5597	1.40666	0.347369	4.04948	5.13319e-05	0.000401404	30.5398	55.6137	32.9176	63.47	39.8842	46.9348	22.5213	82.5154	76.5575	282.335	154.874	216.426	32.1902	107.209	96.7107	115.447	117.259	74.6687	protein_coding
ENSG00000184831	APOO	8.85626	1.40628	0.500679	2.80875	0.00497346	0.0198056	4.36283	1.85379	11.5657	8.18968	5.69775	5.47573	1.87678	4.20997	0	7.34399	11.1191	17.2054	3.11518	17.3576	7.11108	30.0744	13.0288	9.82482	protein_coding
ENSG00000204482	LST1	97.7752	1.40607	0.369408	3.80629	0.000141065	0.000966376	77.4403	23.1724	32.028	60.3989	58.5314	42.2414	30.0284	79.9894	75.6351	106.896	112.78	73.3494	38.4205	183.786	152.177	115.447	98.7448	398.888	protein_coding
ENSG00000218891	ZNF579	31.4358	1.40446	0.290665	4.83188	1.35248e-06	1.6401e-05	16.3606	16.6841	16.9037	8.18968	23.309	10.1692	20.6446	25.2598	18.4476	83.2318	36.5343	38.9385	47.7661	53.0938	42.6665	56.2682	35.6579	15.7197	protein_coding
ENSG00000106615	RHEB	33.3921	1.40435	0.357051	3.93319	8.38251e-05	0.000616974	18.542	10.1959	12.4553	28.6639	21.2371	12.516	41.2891	12.6299	10.1462	49.7759	77.834	35.3164	21.8063	36.7572	105.244	39.7758	45.2581	21.6146	protein_coding
ENSG00000139714	MORN3	5.826	1.40387	0.567077	2.47562	0.0133004	0.0438113	3.27212	0	2.669	2.04742	7.76966	1.56449	7.50711	0.841994	3.68952	16.32	11.9134	9.05548	15.5759	5.10517	1.42222	6.79099	3.42864	5.89489	protein_coding
ENSG00000145675	PIK3R1	442.156	1.40346	0.340776	4.11843	3.81461e-05	0.000308721	286.856	260.458	266.9	191.434	260.025	244.843	292.777	217.234	162.339	176.256	949.893	325.092	860.828	317.542	1727.99	449.176	389.494	579.665	protein_coding
ENSG00000010803	SCMH1	34.757	1.40261	0.310231	4.52117	6.14987e-06	6.27378e-05	18.542	18.5379	11.5657	30.7113	17.0932	14.0805	5.63033	26.1018	28.5938	99.5518	44.4766	44.3718	73.7259	24.5048	44.0887	47.537	41.1437	35.3694	protein_coding
ENSG00000237976	AL391069.3	48.8569	1.40184	0.403891	3.47084	0.000518837	0.00294018	23.9956	19.4648	24.9107	15.3557	14.5034	9.38697	86.3318	14.3139	37.8175	162.384	61.9495	73.3494	42.5741	71.4724	56.8887	82.4621	23.3148	58.9489	lncRNA
ENSG00000165609	NUDT5	54.3986	1.40134	0.29501	4.75014	2.0328e-06	2.34772e-05	14.1792	39.8565	37.366	23.5453	47.6539	29.7254	18.7678	28.6278	27.6714	111.792	40.5055	73.3494	53.9964	99.0404	38.3998	104.775	130.974	58.9489	protein_coding
ENSG00000101868	POLA1	65.7656	1.39992	0.430453	3.25222	0.00114509	0.00579364	50.1726	29.6607	32.9176	13.3082	33.1505	41.4591	28.1517	21.8918	73.7903	25.2959	227.148	124.06	102.801	28.589	118.044	29.1043	41.1437	163.092	protein_coding
ENSG00000161996	WDR90	78.447	1.39978	0.316033	4.42922	9.45752e-06	9.18094e-05	19.6327	67.6634	23.1313	38.901	26.9348	46.1526	95.7157	50.5196	23.9819	95.4718	98.4839	182.921	118.377	140.903	93.8663	121.268	126.86	41.2643	protein_coding
ENSG00000213420	GPC2	54.6948	1.39941	0.56616	2.47176	0.0134452	0.0441872	34.9027	32.4413	28.4693	28.6639	40.4022	26.5964	56.3033	10.9459	12.9133	297.839	49.2419	48.8996	167.181	11.2314	42.6665	44.6265	2.05718	49.1241	protein_coding
ENSG00000138092	CENPO	8.92763	1.39895	0.411732	3.39773	0.000679475	0.00368588	3.27212	2.78069	8.007	6.14226	3.10786	11.7337	0	2.52598	5.53427	16.32	19.8556	16.2999	9.34554	6.12621	15.6444	12.6118	9.60019	11.7898	protein_coding
ENSG00000132603	NIP7	20.35	1.3982	0.392221	3.56482	0.000364102	0.00219615	10.9071	10.1959	14.2347	5.11855	9.84157	19.5562	7.50711	9.26193	11.9909	19.584	22.2383	14.4888	30.1134	16.3366	88.1774	18.4327	15.086	43.2292	protein_coding
ENSG00000257591	ZNF625	12.6464	1.39791	0.347331	4.02471	5.70451e-05	0.000440795	5.45354	7.41516	6.22766	8.18968	12.4315	3.12899	3.75356	6.73595	7.37903	27.7439	13.5018	10.8666	13.4991	23.4838	11.3777	25.2237	13.7146	27.5095	protein_coding
ENSG00000148175	STOM	59.4729	1.39704	0.493507	2.83084	0.00464259	0.018721	29.4491	8.34206	25.8003	14.3319	75.6247	17.9917	67.564	36.2057	20.2923	64.4639	24.621	41.6552	64.3804	234.838	39.8221	187.237	102.173	15.7197	protein_coding
ENSG00000265354	TIMM23	38.2767	1.39629	0.273338	5.10828	3.25104e-07	4.53487e-06	31.6305	21.3186	20.4623	18.4268	24.8629	19.5562	9.38389	20.2079	21.2147	52.2239	57.9784	46.1829	25.9598	56.1569	118.044	36.8654	53.4868	55.019	protein_coding
ENSG00000247516	MIR4458HG	35.1333	1.39557	0.469308	2.97369	0.00294243	0.0128284	16.3606	18.5379	20.4623	27.6402	31.0786	13.2982	7.50711	26.9438	11.0685	87.3118	75.4514	67.9161	0	23.4838	46.9331	33.955	43.8866	80.5635	lncRNA
ENSG00000278845	NA_117	31.8124	1.39435	0.319014	4.37082	1.23781e-05	0.000116403	14.1792	8.34206	24.021	33.7824	20.7191	14.0805	9.38389	10.9459	20.2923	60.3839	33.3574	25.3553	33.2286	26.5469	85.333	44.6265	43.2009	64.8438	protein_coding
ENSG00000123405	NFE2	39.3229	1.39363	0.501542	2.77868	0.00545804	0.0213786	22.9049	17.611	7.11733	8.18968	44.0281	17.9917	43.1659	18.5239	16.6028	69.3599	29.3863	71.5383	84.1099	116.398	2.84443	103.805	18.5147	15.7197	protein_coding
ENSG00000079616	KIF22	57.392	1.39184	0.269081	5.17255	2.3092e-07	3.33824e-06	14.1792	29.6607	35.5866	36.8536	44.0281	32.0721	35.6588	25.2598	32.2833	123.216	119.928	87.8381	38.4205	63.3041	103.822	60.1488	105.602	45.1942	protein_coding
ENSG00000106462	EZH2	205.257	1.39183	0.372072	3.74075	0.000183474	0.00121699	153.79	65.8096	106.76	55.2803	54.3876	86.8295	360.341	92.6193	48.8861	207.264	451.12	233.631	500.506	202.165	419.554	194.999	165.946	294.745	protein_coding
ENSG00000177613	CSTF2T	23.3377	1.39179	0.30867	4.509	6.51331e-06	6.61314e-05	6.54425	12.9765	12.4553	8.18968	24.3449	15.6449	5.63033	16.8399	10.1462	63.6479	27.0036	38.9385	31.1518	30.631	34.1332	20.373	26.0577	35.3694	protein_coding
ENSG00000188725	SMIM15	25.2315	1.3905	0.25015	5.55867	2.71833e-08	4.76405e-07	15.2699	11.1227	16.014	12.2845	18.6472	19.5562	3.75356	13.4719	11.9909	30.1919	48.4477	38.033	24.9214	37.7783	24.1777	45.5967	37.715	45.1942	protein_coding
ENSG00000172465	TCEAL1	28.8733	1.39034	0.463643	2.99874	0.00271098	0.0119616	18.542	16.6841	13.345	9.21339	12.9494	17.2094	13.1374	10.9459	30.4385	15.504	56.39	67.9161	36.3438	25.5259	9.95551	47.537	4.11437	113.968	protein_coding
ENSG00000168675	LDLRAD4	161.694	1.39009	0.315613	4.4044	1.06075e-05	0.000101531	110.162	59.3213	80.07	66.5412	47.6539	54.7573	189.555	94.3033	105.151	200.736	142.96	112.288	153.682	123.545	392.532	346.341	353.836	277.06	protein_coding
ENSG00000124795	DEK	652.494	1.38896	0.29423	4.72067	2.35073e-06	2.64383e-05	504.998	296.607	388.784	368.536	270.384	395.035	287.147	353.638	378.175	300.287	1372.42	1054.96	815.139	531.959	1277.15	534.548	622.641	1992.47	protein_coding
ENSG00000143515	ATP8B2	40.4596	1.38838	0.402647	3.44812	0.000564507	0.00315792	34.9027	20.3917	22.2417	24.569	25.3809	17.2094	26.2749	12.6299	18.4476	175.44	12.7076	49.8051	70.6107	58.199	34.1332	61.119	15.086	49.1241	protein_coding
ENSG00000134333	LDHA	192.601	1.38812	0.2354	5.89686	3.70482e-09	7.66839e-08	79.6217	125.131	137.898	80.8731	133.638	114.208	97.5924	81.6734	106.074	144.432	297.834	195.598	158.874	394.119	445.154	299.774	348.35	225.971	protein_coding
ENSG00000196247	ZNF107	64.6253	1.38738	0.355265	3.9052	9.41487e-05	0.000681287	49.0819	28.7338	48.9316	38.901	26.4168	38.3301	35.6588	23.5758	31.3609	157.488	79.4225	62.4828	83.0715	25.5259	167.822	87.3128	21.9433	157.197	protein_coding
ENSG00000133731	IMPA1	18.8614	1.38609	0.492221	2.816	0.00486264	0.0194415	6.54425	8.34206	9.78633	10.2371	16.0573	18.7739	1.87678	15.1559	5.53427	21.216	19.0614	14.4888	105.916	10.2103	35.5554	15.5223	7.54301	17.6847	protein_coding
ENSG00000131174	COX7B	189.121	1.385	0.273877	5.05702	4.25851e-07	5.80029e-06	71.9867	74.1516	94.3046	165.841	141.408	77.4425	58.1801	151.559	105.151	228.48	504.333	263.514	115.262	231.775	358.399	186.267	271.548	304.57	protein_coding
ENSG00000111142	METAP2	984.729	1.38497	0.319653	4.33272	1.47278e-05	0.000134057	540.991	651.608	691.271	440.195	474.985	543.662	585.555	484.989	493.473	300.287	1416.1	1154.57	1479.71	966.92	3963.72	1018.65	993.62	1524.81	protein_coding
ENSG00000172292	CERS6	66.1438	1.38376	0.307309	4.50285	6.70495e-06	6.7666e-05	51.2633	29.6607	38.2556	50.1618	26.9348	28.9432	30.0284	43.7837	32.2833	102	81.8051	68.8216	103.839	93.9352	22.7555	191.118	141.946	53.054	protein_coding
ENSG00000082515	MRPL22	32.9067	1.38364	0.273821	5.0531	4.34699e-07	5.9101e-06	16.3606	19.4648	19.5727	24.569	24.3449	17.9917	7.50711	20.2079	11.9909	67.7279	69.8918	38.033	18.6911	36.7572	61.1553	40.746	52.1153	45.1942	protein_coding
ENSG00000129084	PSMA1	90.1783	1.38325	0.271054	5.10322	3.33923e-07	4.62783e-06	56.7168	34.2951	44.4833	100.324	53.8696	42.2414	41.2891	47.1517	28.5938	107.712	166.787	88.7437	155.759	62.2831	219.021	92.1635	134.403	147.372	protein_coding
ENSG00000178896	EXOSC4	19.8021	1.38277	0.390343	3.54245	0.000396429	0.00235523	7.63496	14.8303	8.007	5.11855	18.1292	9.38697	7.50711	10.9459	14.7581	18.768	15.0903	17.2054	57.1116	18.3786	11.3777	28.1341	23.3148	70.7387	protein_coding
ENSG00000173674	EIF1AX	243.118	1.3827	0.334241	4.13684	3.52126e-05	0.00028808	185.42	156.645	134.34	153.557	110.847	122.031	90.0853	124.615	133.745	78.3358	409.026	513.445	267.905	193.997	796.441	189.178	203.661	512.856	protein_coding
ENSG00000141576	RNF157	9.65031	1.38156	0.537296	2.57133	0.0101309	0.0352555	5.45354	1.85379	15.1243	1.02371	5.17977	0	7.50711	5.05196	7.37903	9.79198	3.1769	33.5053	6.23036	15.3155	11.3777	15.5223	16.4575	13.7548	protein_coding
ENSG00000180329	CCDC43	47.2082	1.38047	0.342453	4.03114	5.55074e-05	0.000429466	28.3584	32.4413	28.4693	23.5453	26.4168	37.5479	7.50711	14.3139	34.128	24.48	81.8051	67.0105	99.6857	33.6941	110.933	39.7758	39.7722	119.863	protein_coding
ENSG00000126945	HNRNPH2	81.3691	1.3793	0.340305	4.05311	5.05408e-05	0.000395824	61.0797	23.1724	53.38	82.9205	54.9056	28.1609	7.50711	58.0976	35.9728	126.48	245.415	153.943	83.0715	94.9562	68.2664	96.0441	73.3729	117.898	protein_coding
ENSG00000225614	ZNF469	12.0336	1.3789	0.449335	3.06876	0.0021495	0.00980645	9.81637	11.1227	8.89666	5.11855	5.69775	6.25798	3.75356	5.89396	2.76714	16.32	3.97112	16.2999	36.3438	10.2103	28.4443	2.91043	19.2004	23.5796	protein_coding
ENSG00000154229	PRKCA	18.0144	1.37871	0.554158	2.48793	0.0128488	0.0426076	32.7212	7.41516	2.669	4.09484	12.4315	3.12899	13.1374	6.73595	8.30141	22.848	4.76535	12.6777	5.19197	71.4724	19.911	60.1488	13.0288	23.5796	protein_coding
ENSG00000123091	RNF11	48.7725	1.37841	0.36102	3.81809	0.000134486	0.000925523	33.812	16.6841	35.5866	29.6876	22.273	13.2982	26.2749	46.3097	19.37	55.4879	81.8051	43.4663	35.3054	37.7783	217.599	51.4175	52.8011	58.9489	protein_coding
ENSG00000074621	SLC24A1	14.4236	1.3783	0.408512	3.37394	0.000740998	0.00397375	7.63496	4.63448	21.352	6.14226	6.7337	9.38697	1.87678	5.05196	7.37903	9.79198	7.94225	19.0165	31.1518	23.4838	15.6444	30.0744	13.0288	39.2993	protein_coding
ENSG00000112658	SRF	222.387	1.37825	0.427032	3.2275	0.00124876	0.0062157	71.9867	120.496	155.692	299.947	113.955	122.031	11.2607	84.1994	130.978	650.351	322.455	327.808	177.565	135.798	692.619	131.939	174.861	279.025	protein_coding
ENSG00000132199	ENOSF1	17.1058	1.3755	0.481328	2.85773	0.0042669	0.0175184	18.542	6.48827	10.676	4.09484	9.84157	7.04023	15.0142	10.1039	4.6119	19.584	7.14802	19.0165	12.4607	30.631	59.7331	57.2384	13.7146	1.96496	protein_coding
ENSG00000161547	SRSF2	365.212	1.37461	0.437959	3.13868	0.00169711	0.00804268	143.973	156.645	207.292	470.907	220.14	156.449	198.938	186.081	88.5484	526.319	440.001	219.143	312.556	211.354	2210.12	227.013	299.663	298.675	protein_coding
ENSG00000166484	MAPK7	9.99306	1.37424	0.482714	2.84689	0.00441479	0.0180003	9.81637	0.926896	3.55866	11.2608	6.21573	7.04023	1.87678	5.05196	3.68952	36.7199	16.6787	9.05548	6.23036	6.12621	22.7555	9.70142	5.48582	17.6847	protein_coding
[truncated: 2,853 more rows]
