# Supplementary material for: Specific lncRNA signatures discriminate childhood acute leukaemias: a pilot study
Source: Cancer Cell Int. 2022 Nov 30;22:373. doi: 10.1186/s12935-022-02789-3 (PMC9710039; doi:10.1186/s12935-022-02789-3)
Supplement: Supplementary file 8 — Additional file 8: Dataset S8. Complete lists of lncRNAs correlated genes. [file 12935_2022_2789_MOESM8_ESM.xlsx]

## Sheet: PCAT18
.id	p.value	R
PCAT18	0	1
GPATCH2	2.8042e-06	0.7888
AC007996.1	3.98164e-06	0.781529
TAS2R9	5.65783e-06	0.773959
ATP6V1G2	6.01248e-06	0.772619
KCTD1	6.07059e-06	0.772407
TDRD3	6.57693e-06	0.770626
NME7	7.78321e-06	0.76683
TBILA	9.83773e-06	0.761431
MRPS11	1.25774e-05	0.755615
KHDC1P1	1.30694e-05	0.754692
LINC02611	1.41449e-05	0.752778
MRPL48	1.53623e-05	0.75076
MGA	1.56387e-05	0.750322
CD3D	1.62199e-05	0.749423
LINC02098	1.64709e-05	0.749043
AC021683.3	1.83743e-05	0.74632
RNA5SP113	1.9508e-05	0.744815
AC090527.1	2.2396e-05	0.741306
AL365357.1	2.30086e-05	0.740613
RPL5P4	2.34462e-05	0.740128
ZNF678	2.37991e-05	0.739743
ATG10	2.7781e-05	0.735716
REEP2	2.83178e-05	0.735213
RETREG1	3.10871e-05	0.732743
TCEAL8	3.2969e-05	0.731174
CDKN2AIPNL	3.34691e-05	0.73077
COX11	3.56757e-05	0.72905
AC079030.1	3.62606e-05	0.72861
RDH11	3.68894e-05	0.728144
PIBF1	3.69681e-05	0.728086
B3GALNT2	3.78307e-05	0.727459
IDH2-DT	3.80346e-05	0.727313
RNU6-7	3.82395e-05	0.727166
MRPS31	4.00614e-05	0.725894
LDAH	4.02591e-05	0.725759
CHI3L2	4.07706e-05	0.725413
YARS2	4.08654e-05	0.725349
Z95115.1	4.22297e-05	0.724445
AC021549.1	4.23798e-05	0.724347
AL157813.2	4.74811e-05	0.721191
PFKM	4.89809e-05	0.72032
AC114482.1	5.01753e-05	0.719643
SELENOW	5.23329e-05	0.718455
GTF2H5	5.24497e-05	0.718392
AC016877.2	5.26046e-05	0.718308
AL358876.2	5.26046e-05	0.718308
AC018946.2	5.34087e-05	0.717879
YBEY	5.40412e-05	0.717545
ESD	5.40413e-05	0.717545
ZNRD1	5.64121e-05	0.716323
LY6G6E	5.7534e-05	0.71576
GIMAP2	5.91062e-05	0.714988
SLC30A4	5.92909e-05	0.714898
DPH5	6.05326e-05	0.714303
ACAT2	6.219e-05	0.713524
TRUB1	6.4009e-05	0.712691
AC004593.3	6.43478e-05	0.712538
UTP14A	6.44703e-05	0.712483
RNA5SP289	6.45605e-05	0.712442
SRP19	6.95525e-05	0.710273
FAM220BP	6.96428e-05	0.710235
AC106800.1	6.97292e-05	0.710199
AC104472.1	7.02406e-05	0.709985
ARL6	7.45372e-05	0.70824
RAD54B	7.4569e-05	0.708227
ITGB1BP1	7.67766e-05	0.707365
MAP7D3	7.90968e-05	0.706483
BBS7	9.03166e-05	0.70251
ZNF32	9.55311e-05	0.70081
RFPL1	9.63047e-05	0.700565
VPS45	9.66137e-05	0.700468
ATAD1	9.67479e-05	0.700425
RBM45	9.96117e-05	0.699536
ABI2	0.000100404	0.699294
CNOT10	0.000103417	0.698388
AL358075.2	0.000105887	0.697663
FAM25C	0.000107762	0.697122
ATXN10	0.000108538	0.696901
HLA-Z	0.000109502	0.696628
SELENOI	0.00010972	0.696566
MIR128-1	0.000114667	0.6952
SMCO2	0.000116572	0.694687
TP53TG1	0.00012401	0.692754
THYN1	0.0001247	0.69258
MRPS16	0.000124782	0.692559
MTF2	0.000133073	0.690532
AC007637.1	0.00013569	0.689915
ING4	0.000137816	0.689421
USP44	0.00014019	0.688878
HSD17B7	0.000145364	0.687721
AP002852.1	0.000146208	0.687536
AL591846.1	0.000146694	0.68743
SHPRH	0.00014909	0.68691
CZIB	0.000150668	0.686572
ZNF582	0.000150787	0.686547
AC006041.1	0.000152935	0.686092
SNHG19	0.000154663	0.68573
ICE2	0.000156183	0.685414
AC104506.1	0.000161135	0.684405
ATPAF1	0.000161525	0.684326
IMMP1L	0.000162083	0.684215
RNU6-798P	0.000165188	0.683599
WDR89	0.000174346	0.681839
PRELID3BP11	0.000175091	0.6817
TACR3	0.000175642	0.681597
HSPA8	0.000178762	0.681019
ATP11C	0.000180908	0.680628
CHRNA9	0.00018253	0.680334
OR7E83P	0.000183792	0.680107
AC092634.4	0.000187581	0.679434
PRKCI	0.000190424	0.678937
PGAM1P5	0.000190538	0.678917
EFCAB7	0.000193556	0.678397
ELMOD2	0.000194207	0.678286
PKIA	0.000195474	0.67807
SDHAF3	0.000196122	0.67796
AL160291.1	0.000196719	0.677859
GIHCG	0.000197641	0.677704
FSIP2	0.000202135	0.676955
ALKBH3	0.000202508	0.676894
AL589765.5	0.000205112	0.676468
C9orf85	0.000212718	0.675249
AP001258.1	0.000214846	0.674915
TRBJ2-3	0.000216276	0.674692
RPRD1A	0.000221188	0.673936
MYL6B	0.000221609	0.673872
CFDP1	0.000221872	0.673832
ARL3	0.000223338	0.67361
LINC01629	0.000224413	0.673448
AL513534.2	0.000225911	0.673223
MIR762HG	0.000230008	0.672615
COA6	0.000230314	0.67257
PTRHD1	0.000235189	0.671859
AC023824.3	0.000237535	0.671522
ESF1	0.000238981	0.671315
AL096870.10	0.000239705	0.671212
PHF14	0.000244549	0.67053
DDR1-DT	0.000244625	0.67052
SLC25A46	0.00024509	0.670455
AC112176.1	0.000245793	0.670357
OSTCP5	0.0002458	0.670356
LINC00575	0.000247133	0.670171
AL450326.2	0.000248393	0.669997
ERCC6L2	0.00024964	0.669826
LINC02373	0.000250358	0.669727
AC130404.1	0.000253375	0.669317
ANKRD36B	0.000254429	0.669175
IMMT	0.00025626	0.668929
BMS1P7	0.000256555	0.668889
AC087427.1	0.000260288	0.668392
GCNT4	0.000261207	0.668271
TRAT1	0.000263466	0.667975
MSMO1	0.000266267	0.66761
ZNF85	0.000268602	0.667308
RMND1	0.000273037	0.666742
AC021613.3	0.000274032	0.666616
AC253536.1	0.000275831	0.666389
N4BP2	0.000275907	0.66638
ME2	0.000275982	0.66637
AL031430.1	0.000277907	0.666129
ADA	0.000282475	0.665563
PIK3R3	0.000283013	0.665497
PARG	0.000283081	0.665488
ZNF101P1	0.000293688	0.664206
AP000924.1	0.000295191	0.664028
TMEM132D	0.000295958	0.663937
PRKCQ	0.000298127	0.663681
ADH5P2	0.000300102	0.66345
GFM2	0.000300897	0.663357
RNASEH2B	0.000302135	0.663213
MIR4458HG	0.00030331	0.663077
AGBL1	0.000303933	0.663005
CHRNA5	0.00030483	0.662902
AC099552.1	0.000305229	0.662856
AC010148.1	0.000309146	0.662408
WDR78	0.000312727	0.662002
ARMCX5-GPRASP2	0.00031314	0.661956
AC093023.1	0.000313808	0.661881
TTC37	0.000317281	0.661493
SMAD2	0.000318658	0.66134
TET1	0.000323105	0.66085
RBMX	0.000324607	0.660686
DLG5-AS1	0.000330239	0.660076
PIN4	0.000332839	0.659798
AL050309.1	0.000333139	0.659766
AC103957.2	0.000335609	0.659504
FDPS	0.000336577	0.659401
CCNG2P1	0.000338479	0.659201
CASC15	0.00033943	0.659101
LINC02186	0.000340721	0.658966
AC073336.1	0.000344464	0.658576
AL392083.1	0.000346979	0.658317
SLC16A10	0.000354128	0.657588
AK6	0.00035658	0.657341
UXT	0.000358299	0.657168
ATP8A2	0.00036087	0.656912
LNX1-AS2	0.000363206	0.65668
LYSMD1	0.000365443	0.65646
HDHD2	0.000369036	0.656108
FAM24B	0.000373399	0.655684
NEK7	0.000374074	0.655619
NDST3	0.000374348	0.655593
ARMCX2	0.000376243	0.655411
SIAH3	0.000376626	0.655374
ATP5F1C	0.000378735	0.655173
DAP3	0.000379667	0.655084
ATRNL1	0.000380277	0.655026
MIR8076	0.000381646	0.654896
POLR2G	0.000385239	0.654557
HMGCR	0.000386044	0.654482
SNHG8	0.000386072	0.654479
CEP128	0.000386467	0.654442
AC011511.3	0.000386564	0.654433
MIR4999	0.000387524	0.654343
CUZD1	0.000389948	0.654117
HMGB1P49	0.00039185	0.653941
AC108733.1	0.00039271	0.653861
AP000797.3	0.000405459	0.6527
ZC3H8	0.00040719	0.652545
KLK2	0.000410967	0.652208
AC090791.1	0.000411868	0.652128
KLHL7	0.000412675	0.652057
LINC02687	0.000413481	0.651985
RHOU	0.000413502	0.651984
AQP4-AS1	0.00041865	0.651531
TPTE2P5	0.000429413	0.650601
AC092013.1	0.000437028	0.649955
OR4A50P	0.00043851	0.649831
MRPS21	0.000440919	0.649629
GPALPP1	0.00044467	0.649317
MTND6P20	0.000448049	0.649038
LDLRAD4	0.00046038	0.648034
RPL26L1	0.0004676	0.647457
LINC00354	0.000468005	0.647425
NPM1P6	0.000471581	0.647142
AP001318.2	0.000472448	0.647074
TMEM135	0.000473837	0.646965
LINC00602	0.000474191	0.646937
AC073263.3	0.000474358	0.646924
AC006238.1	0.000476211	0.646779
ARHGEF7-IT1	0.00047808	0.646633
THAP9	0.000479955	0.646488
AC130415.1	0.000481638	0.646357
AC117373.2	0.000481803	0.646344
CCDC58	0.000485902	0.646029
CD3G	0.000487088	0.645938
RNU7-7P	0.000488553	0.645826
PCNX2	0.000491085	0.645633
AC118549.1	0.000492136	0.645553
AC096564.1	0.000493592	0.645442
AC010620.1	0.000494247	0.645393
LARS	0.000494865	0.645346
PPP1R1C	0.000500693	0.644908
GRSF1	0.000506884	0.644447
NUDT9	0.000507071	0.644434
SYNJ2BP	0.000508047	0.644361
LINC00972	0.000508367	0.644338
RACGAP1P	0.000509977	0.644219
CHCHD3	0.000513902	0.643931
LINC00382	0.000518771	0.643577
HNRNPA1P24	0.00052044	0.643456
TXNDC9	0.000526095	0.643049
C17orf112	0.000526221	0.64304
AC117373.1	0.000533779	0.642502
AC055717.1	0.000534536	0.642448
KATNA1	0.000536726	0.642294
GDF5	0.000539149	0.642123
CDRT15L2	0.000544917	0.641721
AC087477.5	0.00054586	0.641655
AL512427.2	0.00054586	0.641655
RPS6P7	0.00054586	0.641655
PTP4A2	0.000546943	0.64158
EFL1	0.000546981	0.641577
CCDC25	0.000547416	0.641547
AC114689.3	0.00054855	0.641469
AC012653.2	0.000557527	0.640853
AL137793.1	0.000560607	0.640644
NOVA1	0.000560976	0.640619
RPL9P29	0.000566452	0.640249
AL136419.1	0.000568844	0.640089
AC008581.1	0.000576673	0.639568
AC064836.3	0.000579248	0.639398
MSANTD4	0.000579479	0.639382
SPICE1	0.000581035	0.63928
BCL11B	0.0005916	0.638591
HDAC11	0.000593122	0.638492
CROT	0.000599013	0.638114
ARHGEF26-AS1	0.000599033	0.638112
MAGOHB	0.000601952	0.637926
AC107214.1	0.000604834	0.637743
AC099535.1	0.000612787	0.637241
CST5	0.000613926	0.637169
TBC1D32	0.000614742	0.637118
AC010967.3	0.000616363	0.637017
ZNF638	0.000624028	0.636541
NDUFA12	0.00062959	0.636198
ELP6	0.000630021	0.636172
MC5R	0.000630401	0.636149
AC010207.1	0.000637043	0.635744
AC113137.1	0.000642585	0.635409
IGHVII-74-1	0.000642691	0.635402
RIC8B	0.000642942	0.635387
AC073370.1	0.000650595	0.634929
LINC02672	0.000654076	0.634722
MSH3	0.000654384	0.634703
AL355102.4	0.000655377	0.634645
C11orf44	0.00066255	0.634222
AC010719.1	0.000664979	0.63408
MTX2	0.000665464	0.634051
AC105180.1	0.000668878	0.633852
SYT5	0.000672928	0.633617
NDUFB3	0.000673271	0.633597
SNHG31	0.000678092	0.633319
CHIAP1	0.000679378	0.633245
AC073525.1	0.000682613	0.63306
AC011447.7	0.000689022	0.632695
AC018880.1	0.000694905	0.632363
AL445123.1	0.000694905	0.632363
HMGN1P31	0.000694905	0.632363
MAGEC2	0.000694905	0.632363
PPIAP26	0.000694905	0.632363
PSMB3P2	0.000694905	0.632363
ZP4	0.000694905	0.632363
AL035252.2	0.000697082	0.63224
ZCCHC9	0.000698548	0.632158
YAE1	0.000698785	0.632145
AL845331.2	0.000702692	0.631926
AC092634.3	0.000707955	0.631634
RNU6-137P	0.000709403	0.631554
C5orf64-AS1	0.000711888	0.631417
EGFLAM-AS1	0.000711888	0.631417
OR4K14	0.000711888	0.631417
AC092418.1	0.000714226	0.631288
LANCL1	0.00071931	0.631009
IFT81	0.000724691	0.630716
HDGFL1	0.000730627	0.630395
AC063944.3	0.000740084	0.629888
ECHDC1	0.000740509	0.629866
NFYB	0.000742843	0.629742
SPAG16	0.00074789	0.629474
SRBD1	0.00074994	0.629366
AC012174.1	0.000753789	0.629164
ATP5MD	0.000754844	0.629108
VDAC1P5	0.000757799	0.628954
Z92545.1	0.000757799	0.628954
AC004869.1	0.000757799	0.628954
AC055736.1	0.000757799	0.628954
ACTBL2	0.000757799	0.628954
AL355601.1	0.000757799	0.628954
AC090994.1	0.000758324	0.628926
DCDC1	0.000759911	0.628844
FANCM	0.000762482	0.62871
SCN2A	0.000764163	0.628623
AL022397.1	0.000769832	0.62833
AC005726.4	0.000770166	0.628312
OR7E1P	0.000771017	0.628269
RCBTB2	0.000782728	0.62767
AL136988.1	0.000786674	0.62747
WDR33	0.000792734	0.627165
LINC00486	0.000801718	0.626715
AC019270.1	0.000803409	0.626631
NEIL3	0.000804156	0.626594
CD47	0.000805685	0.626519
SSXP1	0.00080783	0.626413
COX7C	0.000808637	0.626373
AL360178.1	0.000809312	0.626339
HIKESHI	0.000813703	0.626123
AC104164.2	0.000817385	0.625943
PSMA5	0.000820692	0.625781
ITGA1	0.000829021	0.625377
AC013410.1	0.000831935	0.625236
PGM2L1	0.000834149	0.62513
AC009312.1	0.000838562	0.624918
ACOT13	0.000839213	0.624887
ZNF280D	0.000843199	0.624697
AL590235.1	0.000843863	0.624665
GRID1-AS1	0.000845607	0.624582
NDUFB1	0.000845653	0.62458
RNA5SP166	0.000848619	0.624439
NUP35	0.000856578	0.624064
RAB4A	0.000858108	0.623992
TUBA3FP	0.000864366	0.6237
KIFAP3	0.000866679	0.623592
AL050321.1	0.000868745	0.623496
AC013565.1	0.000873012	0.623298
C10orf143	0.000873885	0.623258
TAF1A-AS1	0.000877574	0.623088
AL589986.2	0.000883068	0.622836
ZSCAN16-AS1	0.000884809	0.622756
CCAR1	0.000885516	0.622724
UTP3	0.000890556	0.622495
AC117488.1	0.000894622	0.62231
LYARP1	0.00089495	0.622295
UGT2B24P	0.000902129	0.621972
ZNF681	0.000902868	0.621939
AL353691.2	0.000905748	0.621809
NPM1	0.000907442	0.621734
BX321878.1	0.000911565	0.62155
RNA5SP352	0.000918596	0.621238
RPL19P11	0.000920605	0.621149
AC005252.1	0.000920605	0.621149
AC016885.1	0.000920605	0.621149
AC022809.1	0.000920605	0.621149
AC027088.2	0.000920605	0.621149
AC078899.2	0.000920605	0.621149
AC084364.2	0.000920605	0.621149
AC090150.2	0.000920605	0.621149
AC099849.1	0.000920605	0.621149
AC104031.1	0.000920605	0.621149
AC113423.2	0.000920605	0.621149
AC142116.2	0.000920605	0.621149
AC234772.1	0.000920605	0.621149
AL360007.1	0.000920605	0.621149
AL591888.1	0.000920605	0.621149
AL596028.1	0.000920605	0.621149
AL662789.1	0.000920605	0.621149
AP000534.2	0.000920605	0.621149
COX6B1P4	0.000920605	0.621149
GSTA11P	0.000920605	0.621149
MTND2P19	0.000920605	0.621149
MTND5P7	0.000920605	0.621149
MYCNUT	0.000920605	0.621149
OR10J4	0.000920605	0.621149
OR7K1P	0.000920605	0.621149
PGAM4P2	0.000920605	0.621149
RN7SL341P	0.000920605	0.621149
RN7SL761P	0.000920605	0.621149
RNU4-66P	0.000920605	0.621149
RNU6-411P	0.000920605	0.621149
RPL35P4	0.000920605	0.621149
RPL7P12	0.000920605	0.621149
LINC02345	0.000921602	0.621105
CMAHP	0.000922007	0.621087
AC090206.1	0.000932445	0.620629
MTND6P22	0.000933	0.620605
DTD2	0.000935031	0.620516
AL031656.1	0.000937023	0.62043
MTND6P7	0.000937023	0.62043
RPS12	0.00093757	0.620406
TUB-AS1	0.000940531	0.620278
ULBP2	0.000942268	0.620202
TSEN15	0.000942874	0.620176
GTPBP8	0.000945388	0.620068
KIF3A	0.0009477	0.619968
AC138305.1	0.000952731	0.619752
MIR181A2HG	0.000955617	0.619628
MRPS5	0.000957512	0.619547
TMA16	0.000960993	0.619399
MRPS18CP6	0.000963008	0.619313
CAPSL	0.000963983	0.619272
AL583805.2	0.000970732	0.618987
LRRC34	0.000973312	0.618878
AL358781.1	0.000974688	0.61882
AC008554.1	0.000974846	0.618813
CYP2U1	0.000975061	0.618804
DANCR	0.000990025	0.61818
HKDC1	0.000990207	0.618172
FUNDC2	0.00099148	0.61812
Z68871.1	0.000993087	0.618053
ZFP1	0.000993823	0.618023
AC073475.1	0.000995108	0.61797
NF1P7	0.000998038	0.617849
LEO1	0.00099885	0.617815
MIR4489	0.000990308	-0.618168
PPIAP72	0.000989173	-0.618215
GPR107	0.000978319	-0.618668
RNA5SP294	0.000908904	-0.621668
PIK3R5	0.000900604	-0.62204
DOK3	0.000898539	-0.622133
TNIP1	0.000896805	-0.622212
METTL7A	0.000866536	-0.623599
CCDC159	0.000863794	-0.623726
ISG20L2	0.00086123	-0.623846
USP31	0.000860447	-0.623883
AC025857.2	0.000856965	-0.624046
HLA-DMA	0.000848889	-0.624427
SEC16A	0.000810537	-0.626279
SHC1	0.000758682	-0.628908
RNASET2	0.000740274	-0.629878
SNX29	0.000736879	-0.630059
DENND1A	0.000731148	-0.630367
WWP2	0.000715556	-0.631215
PXK	0.000712247	-0.631397
ZDHHC5	0.000706798	-0.631698
ASCL2	0.000695043	-0.632355
INPP5A	0.000687161	-0.632801
PRKAG2	0.000681616	-0.633117
TNK2-AS1	0.000680863	-0.63316
SPRYD7	0.000679131	-0.633259
LYN	0.00064663	-0.635166
MAN2A2	0.000608876	-0.637487
TTC38	0.0005872	-0.638876
EIF4G3	0.000579501	-0.639381
LTBP2	0.000567989	-0.640146
NBL1	0.000550472	-0.641336
TFE3	0.000525872	-0.643065
WDFY4	0.000519819	-0.643501
ARSB	0.000505737	-0.644532
SMCR8	0.000500793	-0.6449
MGAT3	0.000486779	-0.645961
PDXDC1	0.00048616	-0.646009
AL162724.1	0.000474338	-0.646926
ACTN1	0.000451279	-0.648772
MKNK2	0.000441016	-0.649621
SYK	0.000439317	-0.649763
RELT	0.000429216	-0.650618
FAM13A-AS1	0.000426411	-0.650859
ATP2A2	0.000374154	-0.655612
PARP4	0.000371167	-0.6559
KLHL36	0.000361465	-0.656853
TSC22D2	0.000357298	-0.657269
C1orf198	0.000318366	-0.661372
PDXK	0.000313758	-0.661886
SRPRA	0.000307301	-0.662618
TACC3	0.000296761	-0.663842
MAP2K3	0.000287998	-0.664889
PLOD1	0.000279674	-0.665909
LHFPL2	0.000274794	-0.66652
ZFP36L1	0.000265044	-0.667769
MAFG	0.00024904	-0.669908
KANK2	0.000232455	-0.672256
RFFL	0.000211293	-0.675474
SSH1	0.000206425	-0.676254
DENND3	0.000185684	-0.67977
SUSD6	0.000183195	-0.680214
ECPAS	0.000149059	-0.686917
NATD1	0.000148121	-0.687119
PLCG2	0.000146568	-0.687457
SQSTM1	0.000146106	-0.687558
DUSP22	0.000114586	-0.695222
SIPA1L1	8.12484e-05	-0.705684
TLN1	6.07692e-05	-0.714191
TESC	4.45593e-05	-0.72296
MFN2	3.81524e-05	-0.727228
SLC16A5	3.67716e-05	-0.728231
PPP3CA	2.07797e-05	-0.743217
ADPGK	1.27667e-05	-0.755256
THRA	4.31559e-06	-0.77982
AC095350.1	0.00100287	0.617651
TRBC2	0.00100604	0.617521
AL109920.1	0.00100687	0.617487
MYOZ1	0.00100753	0.61746
AC009148.1	0.0010118	0.617286
AC092125.1	0.00101563	0.61713
GCKR	0.00101848	0.617015
AC090971.1	0.00102397	0.616793
RN7SL228P	0.00102559	0.616728
NXF4	0.00102815	0.616625
SORL1	0.00102894	-0.616593
FASTKD1	0.0010292	0.616583
ACTR6	0.00103526	0.61634
AL096677.2	0.00104413	0.615988
CA9	0.00104743	0.615858
BLMH	0.00105731	0.615469
ERBIN	0.00105981	0.615371
DNAJC19	0.00106516	0.615162
AC091965.1	0.00106612	0.615125
PNPLA2	0.00106615	-0.615124
AC131025.3	0.00106794	0.615054
TMEM127	0.0010689	-0.615017
AC017002.4	0.00108007	0.614585
DLEU2L	0.00108533	0.614384
NUDT19	0.00108573	-0.614368
CICP8	0.00108997	0.614206
MARCH3	0.00109957	-0.613841
PIK3CD	0.00110121	-0.613779
YPEL3	0.00112371	-0.612935
AC004593.2	0.00113031	0.612691
MIR6740	0.00113366	-0.612567
AC073585.1	0.0011344	0.61254
AC007218.1	0.0011376	0.612422
AC090132.1	0.0011376	0.612422
ZYX	0.00113763	-0.612421
RPL22P8	0.00113982	0.61234
STAT3	0.00113985	-0.612339
NIF3L1	0.00114725	0.612068
AC003669.1	0.00115522	0.611778
ACADM	0.0011566	0.611728
FKBP3	0.00116095	0.61157
TFAP2C	0.00116201	0.611532
AC061975.5	0.0011639	0.611464
AC148477.3	0.00116546	0.611408
AC055717.3	0.00116552	0.611405
GPR180	0.00116795	0.611318
PLAAT5	0.00116864	0.611293
LINC02474	0.001169	0.611281
ZSCAN32	0.00117654	0.61101
C3orf52	0.00117861	0.610936
CCT4	0.00118203	0.610815
TBX5-AS1	0.00118231	0.610804
PGAM1P12	0.00118448	0.610727
ANTXRLP1	0.00118631	0.610662
MAP3K3	0.00118754	-0.610619
AL133493.1	0.00118984	0.610537
AP003385.1	0.00119232	0.61045
LCK	0.00119413	0.610386
ANKRD36C	0.00120626	0.60996
GTSCR1	0.0012071	0.60993
IRAK1BP1	0.00120989	0.609833
KRT18P40	0.00121425	0.609681
AP002784.1	0.00121465	0.609667
HAUS1	0.00122021	0.609474
RIOK2	0.00122048	0.609465
ARMCX6	0.0012219	0.609416
ZNF675	0.00122248	0.609396
MANEA	0.00123137	0.609089
SNORA22B	0.0012351	0.608961
DGUOK	0.00123912	0.608824
B3GNTL1P1	0.00123984	0.608799
RNU6-762P	0.00124076	0.608768
AC139768.1	0.00124221	-0.608718
BNIP3P23	0.00124225	0.608717
Z96074.1	0.00124443	0.608643
WIPI2	0.00125	-0.608454
AC092933.2	0.0012518	0.608393
ALDH1A2	0.00125845	0.608168
LDHB	0.00126589	0.607917
PLEKHB2	0.00127003	-0.607779
ADH7	0.00127016	0.607774
RBBP4	0.00127312	0.607675
AP000676.5	0.00127353	0.607662
AC013652.1	0.001277	0.607546
KRT17P1	0.00128029	0.607437
USP10	0.00128228	-0.607371
CDC42EP3	0.00128751	-0.607197
PPIA	0.00128917	0.607143
PUM3	0.00128921	0.607141
LINC01162	0.00129421	0.606976
AC079949.6	0.00129529	0.606941
CDH2	0.00129596	0.606919
AC096664.1	0.00129684	0.60689
AC013470.1	0.00130583	0.606595
STEAP1B	0.00130693	0.60656
LINC01310	0.00130775	0.606533
SUMO2P6	0.00130957	0.606473
FAM76A	0.00131034	0.606448
RPS6KA5	0.0013165	-0.606248
MAP9	0.0013242	0.605999
STON1-GTF2A1L	0.00132619	0.605935
AC012653.1	0.00132717	0.605903
LINC02342	0.00132722	0.605901
PSMA4	0.0013273	0.605899
ASB4	0.00132798	0.605877
SCP2	0.00132905	0.605843
PAWR	0.00132914	0.60584
AC106736.1	0.00132993	0.605814
TRBV13	0.00133082	0.605786
AC098588.2	0.00133153	0.605763
LIAS	0.00133323	0.605708
ACTR3BP2	0.00133367	0.605694
AP003071.3	0.00133923	0.605516
AC013480.1	0.00134529	0.605323
MTHFR	0.00134641	-0.605287
AC007483.1	0.00134851	0.60522
MIR1303	0.00134992	0.605176
UBN1	0.00135328	-0.605069
AL031073.2	0.00135411	0.605043
AC099335.1	0.0013555	0.604999
AC068733.2	0.00135747	0.604937
VDAC1P7	0.00136549	0.604684
DNAJC24	0.00137149	0.604496
AC091588.2	0.00137414	0.604413
AC103851.1	0.00137414	0.604413
MTCO1P25	0.00137414	0.604413
SSH3	0.0013756	-0.604367
HIST1H2BD	0.00137708	0.604321
RF02219	0.001378	0.604292
EFCAB5	0.0013792	0.604254
HOXB-AS3	0.00138587	0.604047
MOCS1	0.00139147	0.603874
WDR61	0.00139254	0.603841
NUDT12	0.00139257	0.60384
AC017037.5	0.00139492	0.603767
AC007406.1	0.00140055	0.603594
AC092079.2	0.00140336	0.603507
MTND5P3	0.00140404	0.603486
ANKRD46	0.00140466	0.603467
LRPAP1	0.00141649	-0.603106
SNAI3	0.00142194	-0.60294
AC022424.2	0.00142424	0.60287
AC002545.1	0.00142732	0.602777
FAM240B	0.00142757	0.602769
AC009315.1	0.00142795	0.602758
HIST1H2BG	0.00143	0.602696
AC021088.1	0.00143358	0.602588
AC079949.1	0.00143598	0.602516
EXTL2	0.00143887	0.602429
NSL1	0.00144484	0.60225
DPYS	0.00144512	0.602241
CHN1	0.00144704	0.602184
RN7SL143P	0.00145625	0.601909
SUCLA2	0.00145769	0.601866
RPS27AP18	0.00145789	0.60186
STMN1	0.00146053	0.601782
PHF6	0.00146505	0.601648
AL162725.2	0.00146605	0.601618
AL355981.1	0.00146862	0.601542
CETN4P	0.00147028	0.601493
NEK6	0.00147164	-0.601453
ELOVL5	0.00147455	0.601368
AC023818.1	0.00148114	-0.601174
ZNF543	0.00148363	0.601101
AL391069.2	0.00148537	0.60105
SNORD73B	0.00148882	0.600949
HIST1H2BF	0.00149055	0.600899
AL162311.1	0.00149205	0.600855
HLA-DQB3	0.00149728	0.600703
RNA5SP141	0.00149976	0.600631
OR8K1	0.00150029	0.600616
MT1X	0.00150115	0.600591
MRPS33	0.00150336	0.600527
AL132981.1	0.00150363	0.600519
TMEM131	0.0015037	-0.600517
OR51A4	0.00150463	0.60049
LARP4	0.00150819	0.600387
ZNF664	0.00151342	0.600236
GTF2H1	0.00151717	0.600129
AC026634.1	0.00151873	-0.600084
MRPL30	0.00152313	0.599958
AC027335.1	0.00152816	0.599814
HERC2P8	0.00153449	0.599634
AC104131.1	0.00154035	0.599467
DRAM1	0.00154204	-0.59942
AC108751.3	0.00154608	0.599305
NHS-AS1	0.00154805	0.59925
AL157400.3	0.00155607	0.599024
CEP112	0.00156318	0.598824
SCAND3P1	0.00156392	0.598804
AC026770.1	0.00156488	0.598777
LINC00448	0.00156519	0.598768
AL138826.1	0.00156598	0.598746
RPL23	0.00157031	0.598625
CR383656.1	0.00157079	0.598612
RAB3IP	0.00157205	0.598577
SNORD115-28	0.00158315	0.598268
AC090897.2	0.00158315	0.598268
MAML3	0.00158343	-0.598261
DEFB116	0.00158753	0.598147
RN7SL751P	0.00158989	0.598082
ZNF277	0.00159231	0.598016
PTPN12	0.00159885	-0.597836
AF233439.2	0.00160274	0.597729
MGAT4A	0.00160417	0.59769
AC083798.2	0.00160846	0.597573
TOM1	0.00160918	-0.597553
RNU6ATAC18P	0.00161334	-0.597439
IFT22	0.00161851	0.597299
AL353726.1	0.00162039	0.597248
G3BP1	0.00162118	0.597226
AC015818.3	0.00162477	0.597129
AP5M1	0.00162793	0.597043
RN7SL479P	0.00163294	0.596908
NSMCE4A	0.00163609	0.596823
FAM27B	0.00163654	0.596811
ARNTL2	0.00164305	0.596636
KYAT3	0.00164374	0.596618
FOXR2	0.001646	0.596557
LINC01811	0.00164788	0.596507
AC008945.1	0.00165024	0.596444
AC007598.3	0.00165116	-0.596419
RPAP3	0.00165456	0.596329
RGS10	0.00166159	0.596142
FP565260.3	0.00166271	-0.596112
FAM149A	0.00166406	0.596076
PMS1	0.00166483	0.596055
SNRPE	0.0016716	0.595876
GCSAM	0.00167268	0.595848
AC092170.1	0.00167367	0.595822
AC092118.1	0.00167607	0.595758
AL354824.1	0.00167998	0.595655
AC099508.1	0.00168296	0.595577
AC245407.1	0.00168306	0.595574
AC112204.1	0.00168388	0.595553
AC012513.3	0.00168484	0.595527
AC119751.3	0.00168501	0.595523
C6orf223	0.00169806	0.595182
CCDC152	0.00170523	0.594995
MTND1P22	0.00170899	0.594898
DUBR	0.00171189	0.594822
AC114501.3	0.00171387	0.594771
AL355304.1	0.00171402	0.594767
ZNF22	0.00172163	0.594571
NR2C1	0.00172801	0.594407
HIST1H4L	0.00174754	0.593908
TBC1D5	0.00175096	-0.593821
AC096647.1	0.00176559	0.59345
AC112498.1	0.00177009	0.593337
AC027176.1	0.00177812	0.593135
TRDMT1	0.00178011	0.593086
SLC30A7	0.00178088	0.593066
ZNF418	0.00179668	0.592672
ADGRL3-AS1	0.00180004	0.592589
ZNF100	0.00180046	0.592578
OR6C71P	0.0018017	0.592548
AL358113.1	0.00180405	-0.592489
TRIM37	0.00180789	0.592395
AC018816.1	0.00181096	0.592319
AC136285.1	0.0018115	0.592306
AC012158.1	0.00181738	0.592161
AC022929.2	0.00182224	0.592041
MTHFD2P7	0.00182522	0.591968
TCERG1L	0.00182523	0.591968
KPNA6	0.00183599	-0.591705
RPS26P2	0.00184111	0.59158
MIR221	0.00184265	-0.591543
AC079601.1	0.00185318	0.591287
KRT24	0.00185672	0.591202
LINC02064	0.00186292	0.591052
RASA3	0.00186501	-0.591002
AC068299.1	0.00186665	0.590962
AASDH	0.00187051	0.59087
EEF1E1	0.00188972	0.590411
CBLN2	0.00189078	0.590385
SLC9A8	0.00189157	-0.590367
AC008736.2	0.00189179	-0.590361
KIAA0391	0.0018987	0.590198
KSR1	0.00189967	-0.590174
DGKD	0.00190166	-0.590127
HNRNPA1P54	0.00190691	0.590003
SALL4P7	0.00190951	0.589942
LINC00840	0.00191303	0.589859
AC068620.2	0.00191718	0.589761
SMARCAD1	0.00191723	0.58976
DISC1	0.00192121	-0.589667
RNY4P24	0.00192543	0.589568
HMGCS1	0.00194509	0.58911
AL133244.2	0.00195663	0.588842
MRPL42	0.00195912	0.588785
KCNQ1	0.00196064	-0.58875
ATP6V0A1	0.00196509	-0.588648
GAA	0.00196715	-0.5886
ARHGAP17	0.00196734	-0.588596
AC093575.1	0.00196813	0.588578
Z86062.2	0.00196918	0.588553
XPC	0.00197441	-0.588433
KDM2A	0.00197448	-0.588432
RNA5SP451	0.00197606	0.588396
KLKB1	0.0019784	0.588342
AL354920.1	0.00198099	0.588283
AC090159.1	0.0019835	0.588225
AC090517.4	0.0019838	0.588219
CREBBP	0.00198844	-0.588113
AC000077.1	0.00199172	0.588038
AC128709.2	0.00199465	0.587972
MT1F	0.00199586	0.587944
ABCB7	0.00199895	0.587874
PLEKHM2	0.00200654	-0.587702
TMEM192	0.00200661	-0.587701
ZNF286B	0.00201765	0.587452
AC079117.2	0.00202162	0.587363
AL121790.1	0.00202243	0.587344
ZNF883	0.00202446	0.587299
OLA1	0.00202447	0.587299
ZNF354C	0.00202939	0.587188
WDR95P	0.00203043	0.587165
SORBS1	0.00203282	-0.587112
AC121333.1	0.00203521	0.587058
AL359198.1	0.00203912	0.586971
HPF1	0.00204026	0.586946
BOD1L2	0.0020437	0.586869
LINC01541	0.00204506	0.586839
MANBA	0.00205035	-0.586721
ZNF518B	0.00205205	0.586684
GGPS1	0.00206139	0.586477
ICOSLG	0.00206206	-0.586462
RALGAPA2	0.00206246	-0.586453
TRNAU1AP	0.00206248	0.586453
AC017099.1	0.00206578	0.58638
SLC4A7	0.00207115	0.586262
FUCA2	0.00207299	-0.586221
SCARF2	0.0020789	-0.586091
C2orf73	0.00207956	0.586077
NEDD8	0.00209934	0.585645
LINC01822	0.00211173	0.585377
BEX2	0.00211225	0.585365
GAL3ST3	0.00212117	0.585173
HINT2	0.00212306	0.585132
AC013652.2	0.00212409	0.58511
HTR1D	0.00212595	0.58507
ABRAXAS1	0.00212801	0.585025
P2RX3	0.00212932	0.584997
DLEU2	0.00213944	0.58478
FRG2B	0.00214159	0.584734
WWTR1-AS1	0.00215099	0.584534
RPL21P88	0.00215243	0.584503
AC027682.3	0.00215436	0.584462
TCF12	0.00215482	0.584452
Z98259.3	0.00216401	0.584257
XRCC5	0.00216454	0.584246
PSMC1P10	0.00216966	0.584138
ERICH5	0.00217868	0.583947
GNG5	0.00217906	-0.583939
AC097639.1	0.00218009	0.583917
LINC00920	0.0021807	0.583905
AC118469.2	0.00218246	0.583868
MKRN3	0.00218375	0.58384
TPRKB	0.00218694	0.583773
AL136038.5	0.0021927	0.583653
ZNF569	0.00219979	0.583504
ORC4	0.00220088	0.583481
HDAC11-AS1	0.00220197	0.583459
HAAO	0.00220265	-0.583445
PLA2G15	0.0022081	-0.583331
AP000911.3	0.00221428	0.583203
PEX1	0.0022169	0.583148
AC008443.5	0.00222058	0.583072
ITGAX	0.00222104	-0.583062
RANGRF	0.00222132	0.583056
POLR3B	0.00222857	0.582906
AC084824.5	0.00223164	0.582843
AC122688.1	0.00223275	0.58282
BDH2	0.00223786	0.582715
LINC01810	0.00224729	0.582521
ZFAND3	0.00224812	-0.582504
SYCP3	0.0022485	0.582496
DCUN1D2	0.00224976	-0.58247
AC099677.5	0.00225282	0.582408
AC138627.2	0.00225719	0.582318
STK24P1	0.00226029	0.582255
LRP2BP	0.00226552	0.582148
AC011676.2	0.00227742	-0.581906
SPATA2	0.00228324	-0.581788
ZNF542P	0.00228516	0.58175
AC011479.2	0.00228774	-0.581697
LMNTD2	0.00229167	-0.581618
AC087521.3	0.00229518	0.581547
RNU6-625P	0.00229733	0.581504
RNU4-78P	0.00230196	-0.581411
AC103758.1	0.00230385	0.581373
AP003068.1	0.00230475	0.581355
AC114763.1	0.00230875	-0.581275
EPM2AIP1	0.00231316	0.581186
FNDC3B	0.00231421	-0.581165
OR1M1	0.00231817	0.581086
PSMA6	0.00232197	0.58101
LAMP1	0.00232657	-0.580918
JAK2	0.00232686	-0.580913
SNRPF	0.00232918	0.580866
LINC00517	0.00233042	0.580842
ZMYM4	0.00233114	0.580827
APOO	0.00233209	0.580809
ANKRD7	0.0023336	0.580779
CDKL3	0.00233661	0.580719
AL935212.3	0.00233905	0.580671
AC074043.1	0.00234263	0.5806
TRAK1	0.00234459	-0.580561
CEACAMP9	0.00234523	0.580548
NCAPGP2	0.00234523	0.580548
AC007333.2	0.00234607	0.580531
AC099842.1	0.00234607	0.580531
AC106864.1	0.00234607	0.580531
GTF2F2P1	0.00234607	0.580531
LINC01991	0.00234881	0.580477
C16orf70	0.00235135	-0.580427
CCDC122	0.00236086	0.58024
TAF1B	0.00236212	0.580215
LRIT3	0.00236233	0.580211
HMGN2P46	0.00236238	0.58021
RNU6-340P	0.0023755	0.579953
CSNK1D	0.00237778	-0.579908
RIPK3	0.00239283	-0.579614
HRH2	0.00239704	-0.579533
ARL9	0.00240102	0.579456
PCDH11X	0.00240594	0.57936
AGPAT3	0.00240864	-0.579308
AC097522.1	0.00240966	0.579288
PIH1D2	0.00241171	0.579249
CDC23	0.00241588	0.579168
LIPT2	0.00242024	0.579084
AC148477.2	0.00242769	0.578941
ZNF568	0.00243258	0.578847
TPD52L2	0.00244459	-0.578617
FAM149B1	0.00244859	0.578541
TMEM237	0.0024493	0.578527
PCYT1A	0.00245309	-0.578455
CASD1	0.00245627	0.578394
WDR91	0.00246189	-0.578288
AC068616.3	0.00247206	0.578095
GBP3	0.00247268	0.578083
RPS7P6	0.00247491	0.578041
AL020994.1	0.00248229	0.577902
SLC30A9	0.0024895	0.577766
KHNYN	0.00249673	-0.577631
AC096721.1	0.0024985	0.577597
AC004816.1	0.00250075	0.577555
VPS37C	0.00250212	-0.57753
AC063943.1	0.00250263	0.57752
C11orf21	0.00250337	-0.577506
HDAC2-AS2	0.00250636	0.57745
PA2G4P2	0.00251001	0.577382
AC127381.1	0.00251694	0.577253
HMGB1P47	0.00251694	0.577253
ADAMTS19-AS1	0.00251703	0.577251
VDR	0.00252012	-0.577194
AC145285.2	0.00252075	-0.577182
CASP9	0.002523	-0.57714
PELO	0.00252544	0.577095
PATL1	0.00253433	-0.57693
NIFKP1	0.00253484	0.57692
KCNG3	0.00254955	0.576649
EP300	0.00255797	-0.576494
OR7E47P	0.00256062	0.576445
ABRACL	0.00256721	0.576324
ZNF229	0.00256992	0.576275
UBAP1	0.00257008	-0.576272
HMGN1P26	0.00257063	0.576262
C17orf75	0.00257207	0.576235
AC008438.1	0.00257628	0.576159
CABLES2	0.00257774	-0.576132
RAPGEF1	0.00257973	-0.576096
TBK1	0.00258027	-0.576086
TRPM2	0.00258129	-0.576067
PPA1	0.00258202	0.576054
AC008127.2	0.002588	0.575945
SWI5	0.00259104	0.57589
MARF1	0.00259284	-0.575857
SIRPA	0.00259652	-0.57579
OGN	0.00260369	0.57566
GKAP1	0.00260453	0.575645
SPI1	0.00260835	-0.575576
CRIP3	0.00261046	-0.575538
GEMIN2	0.00261075	0.575533
MDH1	0.00261829	0.575397
AL391361.2	0.00262015	0.575363
AGKP1	0.00262262	0.575319
FBXO47	0.00262734	0.575234
RN7SL740P	0.00262964	0.575193
RPL26	0.00263061	0.575175
TRAM1L1	0.00263251	0.575141
ZNF544	0.00263382	0.575118
ZNF519	0.00263879	0.575029
LYPD2	0.00264961	0.574836
STX16	0.00265093	-0.574812
LINC02475	0.00265422	0.574753
AC138646.1	0.0026547	0.574745
PLPPR2	0.00266744	-0.574519
SOST	0.00267234	0.574432
DPEP2	0.00267284	-0.574423
OR1C1	0.00267559	0.574374
RARS	0.00267989	0.574298
ARMC1	0.0026853	0.574203
NLK	0.00268938	0.574131
VWA8-AS1	0.00268997	0.574121
GPR63	0.00269512	0.57403
PHTF1	0.00269622	-0.574011
RAB39B	0.0027063	0.573834
TRIM5	0.00270945	0.573779
AC134508.1	0.00272325	0.573538
CBR3	0.00272952	0.573429
TRIM64B	0.0027306	0.57341
AC067838.1	0.00273367	0.573357
CRTC3	0.00273604	-0.573316
AC068987.2	0.0027378	0.573285
HIST1H2BC	0.00274204	0.573212
MTND1P10	0.00274299	0.573195
ADAM21P1	0.0027454	0.573153
CEP57	0.00274679	0.573129
LINC01725	0.00275205	0.573039
MTA3	0.00276046	0.572894
EPB41L5	0.00277148	0.572704
AC003685.2	0.00277338	0.572672
LINC01497	0.00278694	0.57244
PAIP2	0.00278931	0.572399
AC027312.1	0.00279163	0.57236
AL592494.2	0.00279219	0.57235
NAPA	0.00279263	-0.572342
AC004253.2	0.00279577	0.572289
AC025278.3	0.00279577	0.572289
AC103855.1	0.00279577	0.572289
C16orf78	0.00279577	0.572289
FP325330.1	0.00279577	0.572289
LINC01438	0.00279577	0.572289
RN7SL101P	0.00279577	0.572289
SPAG11A	0.00279577	0.572289
AL035414.1	0.00279669	0.572273
AL031429.1	0.00280589	0.572117
AL591885.1	0.00280617	0.572112
TRBJ2-2	0.00280638	0.572109
AP001318.1	0.00280699	0.572098
AL137857.1	0.00281066	-0.572036
AC103736.1	0.00282411	0.571808
TEFM	0.00282438	0.571804
TMEM140	0.0028289	-0.571728
HTT	0.002839	-0.571558
EID1	0.0028417	0.571512
AL606490.1	0.0028417	0.571512
AC015936.1	0.00285748	0.571248
TMEM69	0.00285872	0.571227
ANPEP	0.00286745	-0.571081
ZNF746	0.00286873	-0.57106
CWC27	0.00286961	0.571045
AL445250.1	0.00287286	0.570991
AL353637.2	0.00287515	0.570953
OSBPL2	0.0028841	-0.570805
ARMCX1	0.00288468	0.570795
BX088651.4	0.00289322	0.570653
AL109804.1	0.00289845	0.570567
AC015813.8	0.00290025	0.570537
CBX3P1	0.00290377	0.570479
GAS5	0.00290508	0.570458
RN7SL451P	0.0029129	0.570329
AC022469.1	0.00291295	0.570328
RNF216	0.00291492	-0.570296
HMGN4	0.00291517	0.570291
LINC00581	0.00291579	0.570281
AP001330.5	0.00291851	0.570237
ADAMTS19	0.00292859	0.570071
HMGB1P26	0.00293427	0.569978
PIK3CB	0.00293874	-0.569905
IGHV3-29	0.00294027	0.56988
EFL1P1	0.00295221	0.569686
GSTCD	0.00295591	0.569626
GATC	0.00295812	0.56959
NAP1L3	0.00295881	0.569579
PUS7L	0.00296334	0.569505
AC087588.3	0.00296453	0.569486
PDE10A	0.00297412	0.569331
LINC02442	0.00297463	0.569323
TAB2	0.00297603	-0.5693
MTATP6P19	0.00298099	0.56922
AL589642.2	0.00298112	0.569218
TAAR3P	0.00298112	0.569218
CEP290	0.00298476	0.569159
UQCR10	0.00298619	0.569136
THOC2	0.00298777	0.569111
TBCE	0.00299117	0.569056
AOC2	0.00299157	-0.56905
AC022201.1	0.00301443	0.568683
AC096589.1	0.00301735	0.568637
GTPBP1	0.00301845	-0.568619
AL031289.1	0.00302185	0.568565
ECI2	0.00302222	0.568559
LINC02464	0.00302307	0.568545
KLHDC7B	0.00303508	-0.568354
AC048344.4	0.00303674	0.568328
NUDCD1	0.00303801	0.568308
ICAM2	0.00304489	0.568199
AC008764.3	0.00304868	0.568139
AC023200.1	0.00305349	0.568063
HIST1H4E	0.00305674	0.568011
DLX6	0.00306263	0.567918
NKAPD1	0.00306961	0.567808
AC040173.1	0.00307599	0.567708
AL121759.2	0.00307851	0.567669
IGHD	0.0030843	-0.567578
AC012065.4	0.00308517	0.567564
LINC00555	0.0030931	0.56744
AC091691.3	0.00309743	0.567373
TMPPE	0.00310648	-0.567231
ATR	0.00310855	0.567199
RNU6-954P	0.00310998	0.567177
FAM104B	0.00311305	0.567129
MOBP	0.00311524	0.567095
ENPP5	0.003121	0.567006
AC100832.1	0.00312139	0.567
AL138999.2	0.00312661	0.566919
AC021134.1	0.00313327	0.566816
ETNPPL	0.00313348	0.566813
BRPF3	0.0031343	-0.5668
ABHD18	0.00313678	0.566762
PUS3	0.00314136	0.566691
LINC02485	0.00314281	0.566669
ORC2	0.00314289	0.566667
FURIN	0.00314694	-0.566605
SH3RF3	0.00315258	-0.566518
TAF12	0.00316423	0.566339
SLC25A13	0.00316829	-0.566277
HSPA8P16	0.00316966	0.566256
AC026371.1	0.00317011	0.566249
ANKRD26	0.00317208	0.566219
AC074135.1	0.00317916	0.566111
RELA	0.00317985	-0.5661
C6orf203	0.00318506	0.566021
TTC21A	0.00318511	-0.56602
PLGRKT	0.0031879	0.565978
CPO	0.00318971	0.56595
POLI	0.00319194	0.565916
BAZ2A	0.00319228	-0.565911
ATP5PD	0.00319644	0.565848
ASB9	0.00319684	0.565841
TGFB2-AS1	0.00319786	0.565826
TENT4A	0.00320747	-0.56568
AC023355.1	0.00320822	0.565669
AC245041.2	0.00320846	0.565665
GUCD1	0.00322577	-0.565403
MED7	0.00323194	0.56531
AC044839.4	0.00323408	0.565278
CPSF3	0.00323414	0.565277
DDX50	0.00323539	0.565259
AC233728.2	0.0032494	0.565048
AC091493.1	0.00325538	0.564959
DPY19L3	0.00325659	-0.564941
CARNMT1	0.00325758	0.564926
TMEM232	0.00326661	0.564791
METTL25	0.00327206	0.56471
AMN1	0.00327875	0.56461
GGCT	0.00328054	0.564583
MAP3K5	0.00328728	-0.564483
NOMO2	0.00328771	-0.564477
RPL22P14	0.00328796	0.564473
HNRNPA1P74	0.00329125	0.564424
LINC01936	0.00329231	0.564409
UBA6-AS1	0.00329288	0.5644
HNRNPR	0.00329387	0.564386
C14orf39	0.00331159	0.564124
CNN3	0.00331276	0.564106
NME1	0.00331783	0.564032
OR6X1	0.00331896	0.564015
AC018716.1	0.00331907	0.564013
AC078883.1	0.00332169	-0.563975
ANTXR1	0.00332243	0.563964
LSR	0.00332706	-0.563896
SRFBP1	0.00333666	0.563755
ULBP1	0.00334457	0.563639
AC113367.1	0.00335272	0.56352
SURF2	0.00336819	0.563295
TIRAP	0.00337064	-0.563259
SC5D	0.00337114	0.563252
VAMP2	0.00337799	-0.563153
TRAPPC6B	0.0033786	0.563144
ARL5C	0.00338399	0.563066
ATG9A	0.00338819	-0.563005
MMP14	0.00339488	-0.562908
LINC02056	0.00339568	0.562896
RPS15AP25	0.00339724	0.562874
AL365272.1	0.00340071	-0.562824
LINC02304	0.00340868	0.562709
SCAPER	0.00341097	0.562676
AC023790.2	0.00341292	0.562648
GRINA	0.00342051	-0.562539
DTX3	0.00342486	0.562477
MACROD2-AS1	0.00342904	0.562417
LTB4R	0.00344445	-0.562197
NDUFAF4	0.00344445	0.562197
AL592291.1	0.00344506	0.562188
BDP1	0.00344961	0.562123
AL138740.1	0.00345396	0.562061
AC067969.1	0.00346016	0.561973
PDE6D	0.00346544	0.561898
COX7A2L	0.00346806	0.561861
AC023824.6	0.00346822	0.561859
SLAIN1	0.00346925	0.561844
ZNF138	0.00347239	0.5618
AC073869.3	0.00347935	0.561701
LINC00554	0.0034803	0.561688
MARK2P16	0.0034834	0.561644
GMEB2	0.00348883	-0.561567
ROBO1	0.00349067	0.561541
SLC38A6	0.00350089	0.561397
DIP2B	0.00350405	-0.561353
AC063919.1	0.00350623	0.561322
AL136382.1	0.00351143	0.561249
AC025572.1	0.00351769	0.561161
AC063926.1	0.0035186	0.561148
TTC30A	0.00352117	0.561113
RECQL	0.00352137	0.56111
PUDP	0.00352222	0.561098
AC079354.3	0.00353154	0.560967
COX14	0.00353174	0.560965
AC069366.2	0.00354462	-0.560785
AC013727.1	0.00354866	0.560729
AL354977.2	0.00354913	0.560722
HECW1	0.00355406	0.560654
ZSWIM5	0.00355869	0.560589
RN7SKP50	0.00356355	-0.560522
G6PC2	0.00356636	0.560483
TNK2	0.00356785	-0.560462
AC105446.1	0.00356859	0.560452
FMNL1	0.00356984	-0.560435
LINC02454	0.00357193	0.560406
FLOT2	0.00357434	-0.560373
NIPAL1	0.00357906	0.560308
AL591034.1	0.0035817	0.560271
OR7E140P	0.00358335	-0.560248
AC021220.2	0.00359388	0.560103
RN7SL715P	0.00360081	0.560008
RN7SL181P	0.00360094	-0.560006
CCT8	0.00360897	0.559896
LINC00226	0.00361163	0.55986
C12orf57	0.00361626	0.559796
PRXL2A	0.00361782	0.559775
SNX20	0.00361826	-0.559769
AC087623.3	0.00362565	0.559668
PSAT1P3	0.0036286	0.559627
RHBDF2	0.00363035	-0.559604
AL162393.1	0.00363115	0.559593
MIR4254	0.00363223	0.559578
ST3GAL1	0.00363522	-0.559537
CU638689.1	0.00364341	0.559426
AC113192.5	0.00364413	0.559416
RPP38	0.00365335	0.559291
RNPEPL1	0.00366069	-0.559191
LINC02628	0.00366741	0.5591
KIF13A	0.00366758	-0.559098
MTND4P1	0.00369138	0.558777
AC079296.1	0.00369395	0.558742
AL606534.2	0.00369418	0.558739
MTND2P33	0.00369418	0.558739
PDLIM1P2	0.00369418	0.558739
CAPS2	0.00369519	0.558726
KCTD16	0.00370584	0.558583
EPHX2	0.00371323	0.558484
NFKBID	0.00371811	-0.558418
SPIN2B	0.00372336	0.558348
C15orf41	0.003729	0.558273
HSBP1P1	0.00373244	0.558227
PTEN	0.00373587	0.558181
EDEM2	0.00374267	-0.558091
LINC00378	0.00374317	0.558084
SIGLEC31P	0.00374619	0.558044
NLRP1	0.00375378	-0.557943
TGDS	0.00375503	0.557927
AC002057.1	0.0037617	0.557838
CDON	0.0037624	0.557829
LSP1P4	0.00376249	0.557828
SNRPGP10	0.00376322	0.557818
UQCRB	0.0037643	0.557804
CNPY4	0.00377248	0.557696
PTPRE	0.00377848	-0.557617
AL079343.1	0.00378358	0.557549
RXRA	0.0037877	-0.557495
LATS2	0.00379386	-0.557414
RN7SKP36	0.00380225	0.557304
AC096675.1	0.00380502	0.557268
LINC01963	0.00381129	0.557186
AC072062.1	0.00381226	0.557173
RFX5	0.0038218	0.557048
AC105460.1	0.00382185	0.557048
AL109897.1	0.00382185	0.557048
AC000065.1	0.00382312	0.557031
AC119868.2	0.00382408	0.557018
TTC27	0.00383194	0.556916
AL023973.1	0.00383489	0.556878
KAZN-AS1	0.00383667	0.556854
HIST1H2AC	0.00384591	0.556734
IGLJ5	0.00384595	0.556734
TET3	0.0038569	-0.556592
GLS2	0.00385788	0.556579
NBEA	0.00386496	0.556487
RAB28	0.00386535	0.556482
LINC00284	0.00386921	0.556432
MIR626	0.00386937	0.55643
BTK	0.00387556	-0.55635
AC092939.1	0.00388112	0.556278
CBX1	0.00388993	0.556165
KIAA1143	0.00389895	0.556049
AL031601.2	0.00389967	0.55604
SLC35A5	0.00390579	0.555961
WASHC3	0.00391894	0.555793
AC008522.1	0.00392017	0.555777
SERPINB6	0.00392058	-0.555772
MCTP2	0.00392355	-0.555734
RHOQ	0.00392709	-0.555689
TIGD3	0.00392779	-0.55568
C14orf177	0.00393681	0.555565
ERLNC1	0.0039411	0.55551
DAZL	0.00394254	0.555492
RTP4	0.00394315	0.555484
CDV3P1	0.00394702	0.555435
AL157813.1	0.0039484	0.555417
AC132872.3	0.0039495	-0.555403
BX255925.2	0.00395013	-0.555395
SLC9A7	0.00395612	-0.555319
AC093838.1	0.00395804	0.555295
AC063924.1	0.00395933	0.555279
SPRR4	0.00396248	0.555239
MIIP	0.00398109	-0.555003
CMTM4	0.00398644	-0.554936
IKBKG	0.0039876	-0.554921
ZNF43	0.0039929	0.554855
AL133538.1	0.003998	0.55479
NDUFB5	0.00399807	0.554789
AC009712.1	0.00400088	0.554754
RRBP1	0.00400462	-0.554707
NAP1L2	0.00400515	0.554701
ZNF730	0.00401103	0.554627
AC140059.1	0.00401593	0.554565
ZNF829	0.00401985	0.554516
IMPDH1	0.00402164	-0.554494
AC063976.3	0.00402319	0.554475
AC093875.1	0.00402559	0.554445
EHBP1L1	0.00403112	-0.554375
AL023583.1	0.00403295	0.554353
AC130888.1	0.00403743	0.554297
SKA2	0.00403836	0.554285
AL589745.2	0.00403854	0.554283
MRPL11	0.00404147	0.554246
RMC1	0.00404306	-0.554226
SNHG12	0.0040501	0.554139
B4GALNT2	0.00405254	0.554109
FZD6	0.00405655	0.554059
PARGP1	0.00405865	0.554033
MIR4295	0.00406666	0.553933
HMGB1P25	0.00406681	0.553931
AC104423.1	0.00407257	0.55386
OSBPL9P4	0.00407393	0.553843
OLA1P2	0.00407854	0.553786
PNMA8A	0.00408844	0.553664
ST8SIA4	0.00409807	0.553545
AL109615.3	0.00409809	0.553545
EIF4G1	0.00409925	-0.553531
AC078842.2	0.00410538	0.553455
ASB3	0.0041114	0.553381
UNC93B7	0.00411199	0.553374
LINC02689	0.00412635	0.553198
DPPA2P4	0.00412999	0.553154
RBIS	0.00413461	0.553097
RN7SL596P	0.00413466	0.553097
TCEAL2	0.00413533	0.553088
SPOPL	0.00413552	-0.553086
AC004233.2	0.00413841	-0.553051
SIK3	0.00414013	-0.55303
AC079610.2	0.00414385	0.552984
SNX8	0.00414518	-0.552968
GPR89B	0.00415112	0.552896
HIST1H1D	0.00415118	0.552895
AC074351.1	0.00415129	0.552894
HIST1H3A	0.00415243	0.55288
RNU6-26P	0.00415668	0.552828
HEATR3	0.00416098	0.552776
ARL2BP	0.00416271	0.552755
AL583829.1	0.00416542	0.552722
DHX40P1	0.00416746	-0.552697
AL627171.2	0.00417423	0.552615
HERC2P5	0.00417853	0.552563
Z97989.1	0.00418195	0.552521
RAD18	0.00419358	0.552381
AC005100.1	0.00419422	0.552373
AC110023.1	0.00419436	0.552371
FLCN	0.00420445	-0.55225
AP000445.1	0.00420671	0.552222
SORBS2	0.00421256	0.552152
AL138899.1	0.0042278	0.551969
KLK15	0.0042342	0.551892
AC022733.1	0.00423659	0.551864
AL161636.2	0.00423659	0.551864
AL355870.1	0.00423659	0.551864
RNU6-860P	0.00423659	0.551864
AC093159.1	0.00423833	-0.551843
AL162632.2	0.00425069	0.551695
LRRIQ1	0.00425356	0.551661
AL359508.1	0.00425591	0.551633
LINC00410	0.00425616	0.55163
PER2	0.00425902	-0.551596
LINC01766	0.00426387	0.551538
AC023449.2	0.00426399	-0.551536
IL6R	0.00427193	-0.551442
DNMBP	0.00427353	-0.551423
MESTP4	0.00427587	0.551395
AGA	0.00428157	0.551328
POR	0.00428443	-0.551294
AL359504.2	0.00430497	0.551051
DDX4	0.00430898	0.551003
MIR4659B	0.0043137	0.550948
ABHD2	0.00432469	-0.550818
RAB38	0.0043278	0.550782
AL445985.2	0.00433108	0.550743
DNAJC15	0.00433357	0.550714
LINC00865	0.00434261	0.550608
LINC02532	0.00435004	0.550521
ACVR2B	0.00435976	0.550407
AL451165.2	0.00436115	0.550391
RHBDF1	0.00436124	-0.55039
MAPK6P6	0.00436735	0.550318
RNA5SP295	0.00436919	0.550297
AL606970.5	0.0043698	0.55029
INPP5D	0.0043824	-0.550143
SLC22A11	0.0044013	0.549924
AL158151.1	0.00440657	0.549862
AC011447.3	0.00440925	0.549831
LINC01743	0.00441015	0.549821
GDI2	0.00441559	0.549758
TFR2	0.00441773	-0.549733
TMEFF2	0.00442834	0.549611
IPP	0.00444108	0.549464
ITGB2	0.00444238	-0.549449
CASC3	0.00444262	-0.549446
P4HB	0.00444565	-0.549412
LINC01616	0.00445124	0.549347
MYO7B	0.00445192	0.549339
PARD6A	0.00445577	0.549295
LYPLA2P2	0.00445622	-0.54929
ASTN2-AS1	0.00446034	0.549243
AL021937.3	0.00446188	0.549225
SNORD56B	0.00446282	-0.549215
MAGEA9B	0.00446476	0.549192
AL627230.3	0.00446594	0.549179
ALG8	0.00447531	0.549072
AL157911.1	0.00448425	0.548969
PPM1K-DT	0.00448974	0.548907
FADS1	0.00448979	0.548906
AL365226.1	0.00449119	0.54889
WSPAR	0.00449325	0.548867
AC018767.3	0.00449325	0.548867
AL713998.4	0.00449325	0.548867
AC099677.2	0.00449736	0.54882
ALG10	0.00450099	0.548779
AC092805.1	0.00450207	0.548767
AC000374.1	0.00451243	0.548649
CLN5	0.00451252	0.548648
AL606753.2	0.0045177	0.548589
LRRC28	0.00452351	0.548523
STSP1	0.0045337	0.548408
AC024082.2	0.0045337	0.548408
AL162399.1	0.0045337	0.548408
RPS15A	0.00453601	0.548382
ARID5A	0.00454149	-0.54832
ZNF527	0.00454396	0.548292
AC006355.1	0.00455505	0.548167
DLG1	0.00455863	0.548127
NSFL1C	0.00456259	-0.548082
TBC1D19	0.00456793	0.548022
NEK3	0.00457002	-0.547999
LINC02631	0.00457011	-0.547998
FUNDC1	0.00457163	0.547981
AC116366.1	0.00457181	-0.547979
C8orf37-AS1	0.00457958	0.547891
PCDHB15	0.00458544	0.547826
MIR3131	0.0045965	0.547702
CYP4F9P	0.00460666	0.547589
ELK3	0.00460767	-0.547577
EXO5	0.00461073	0.547543
TDRKH-AS1	0.00461352	0.547512
AC007823.1	0.00461829	0.547459
AC068442.1	0.0046207	0.547432
HMGB4	0.0046207	0.547432
TCEAL5	0.00462175	0.54742
ERC2-IT1	0.00462447	0.54739
SLC25A51P3	0.00462755	0.547356
YWHAZP1	0.00462755	0.547356
ZNF285	0.00463167	0.54731
AP002991.3	0.00463691	0.547252
TMEM62	0.00464518	-0.54716
TMEM220	0.00464663	-0.547144
AL590704.1	0.00464971	0.54711
PWP1	0.0046593	0.547004
Z83820.1	0.00466044	0.546992
AP006748.2	0.00467103	0.546875
SNHG3	0.0046734	0.546849
FIRRE	0.00467726	0.546806
AC079352.1	0.00468035	0.546772
AC074008.2	0.00468346	0.546738
AC006116.7	0.00469063	0.546659
MUC17	0.00469269	0.546636
AL136040.2	0.00469831	0.546575
AC008278.2	0.00470274	0.546526
ZNF254	0.00471266	0.546418
AC114546.1	0.00472489	-0.546284
ATP2A1-AS1	0.00472659	0.546265
ARHGDIA	0.00473707	-0.546151
TPRG1L	0.00473912	-0.546129
CLNS1A	0.00474092	0.546109
AL137230.1	0.00474614	0.546052
AC069503.4	0.00474678	0.546045
AC233296.1	0.00474965	0.546014
TTC7B	0.0047558	-0.545947
AL590999.1	0.00475848	0.545918
IL4	0.00475884	0.545914
AP001053.1	0.00475921	-0.54591
OR51I2	0.00476336	0.545865
ZNF840P	0.00476824	0.545812
TNFRSF10D	0.00478075	-0.545677
ZMYM2	0.00478265	0.545656
DPY30	0.00478465	0.545635
GDI2P1	0.00478582	0.545622
AC011893.1	0.00478713	0.545608
NFKB2	0.00479276	-0.545547
AC137735.1	0.00479497	0.545523
PSG9	0.00480008	0.545468
RMDN1	0.00480318	0.545435
RBM41	0.00480595	0.545405
AC073288.1	0.00483158	0.54513
NDUFA12P1	0.00483575	0.545085
OPN4	0.00483575	0.545085
LPAR6	0.00484456	0.544991
NUMB	0.00484667	-0.544969
CALML4	0.00484962	0.544937
AC010677.1	0.00485001	0.544933
ZNF665	0.0048543	0.544887
LINC00559	0.00486828	0.544738
QSOX2	0.00487556	-0.544661
AC010181.2	0.00488051	0.544608
AP001107.5	0.00490904	0.544306
RN7SL683P	0.00491302	-0.544264
RBM48P1	0.00491556	0.544237
LINC01221	0.0049177	0.544214
AC005837.1	0.00491839	0.544207
MIR3975	0.00492066	-0.544183
CCDC15-DT	0.00492073	0.544182
RNU4-9P	0.00492519	-0.544135
AL161901.1	0.00493582	0.544023
B3GALT5-AS1	0.00493714	0.544009
RREB1	0.00493861	-0.543994
LINC01381	0.00494811	0.543894
OR2J4P	0.00495473	0.543824
IWS1	0.0049552	0.54382
RPL3P3	0.0049614	0.543755
AC093157.1	0.00496301	0.543738
RGPD2	0.00496494	0.543717
MAPRE1P3	0.00496641	0.543702
AL391538.1	0.00497561	0.543606
EVI2A	0.00497767	0.543584
AC022023.1	0.00498176	0.543542
GCFC2	0.00498909	0.543465
AC105339.4	0.00499161	0.543439
AL139118.1	0.0050038	0.543312
AC130324.3	0.00500443	0.543305
AC004551.2	0.00501424	0.543203
CCT6A	0.00501488	0.543197
LINC02167	0.00502069	0.543136
AC035139.1	0.00503356	-0.543003
GGA2	0.0050369	-0.542969
AC005066.1	0.00503912	0.542946
AP001284.1	0.00503912	0.542946
CXorf66	0.00503912	0.542946
LINC01812	0.00503912	0.542946
NUS1P4	0.00503912	0.542946
SPANXN5	0.00503913	0.542945
AC104986.2	0.0050459	0.542876
TOP1	0.00504722	-0.542862
ABCG1	0.00504737	-0.54286
NFKB1	0.00504959	-0.542837
AC116350.1	0.00505584	0.542773
GMIP	0.00505841	-0.542746
GIPC3	0.00505935	-0.542737
AL353608.3	0.00506532	0.542675
TEX12	0.00506677	0.54266
PAK5	0.00506724	0.542655
AC104407.1	0.00507983	0.542526
AC007344.1	0.005082	0.542504
AL162595.2	0.00508587	0.542464
AC009804.2	0.00508669	0.542456
AC107302.2	0.00508911	0.542431
ELP4	0.00509516	0.542369
FRG1CP	0.00509775	0.542342
GSTZ1	0.00510166	0.542302
AL139811.2	0.00510998	0.542217
FAM107B	0.00511011	-0.542216
WBP2	0.0051114	-0.542203
AC000068.3	0.00511348	0.542181
LINC01777	0.0051209	0.542106
AC092637.1	0.00512174	0.542097
AC135895.1	0.00512174	0.542097
AL392088.1	0.00512174	0.542097
AL138885.4	0.00513285	0.541984
AL355677.1	0.00513285	0.541984
LINC02409	0.00513285	0.541984
ITSN2	0.0051429	-0.541882
AC145207.6	0.00515712	0.541737
CFAP36	0.00516715	0.541635
RARA	0.00516774	-0.54163
PNPT1	0.00516893	0.541618
ASAP1	0.00517212	-0.541585
ACVR2B-AS1	0.00518333	0.541472
CAMK4	0.00518689	0.541436
RGPD1	0.00518908	0.541414
ZNF155	0.00519757	0.541328
COPS9	0.00520351	0.541268
AP002967.1	0.00520452	0.541258
EEF1GP2	0.00520628	0.541241
CTBP2	0.00520637	-0.54124
NEIL2	0.00521423	-0.541161
NINL	0.00522412	0.541061
LINC01980	0.00522494	0.541053
LSM5	0.00522936	0.541009
AL034372.1	0.00523493	0.540953
BTD	0.00523662	-0.540936
SKI	0.00523761	-0.540926
RBFOX2	0.00524481	0.540854
AC004257.1	0.00525234	0.540779
RNU12-2P	0.00525244	0.540778
AC009803.2	0.00525552	0.540747
SEPHS1	0.00526108	0.540692
NVL	0.00526175	0.540685
PRTFDC1	0.00526319	0.540671
CCDC26	0.00526472	0.540655
AC011483.3	0.00526767	0.540626
MTHFD2P6	0.0052677	0.540626
LINC02087	0.00527186	0.540584
AP002387.2	0.00527638	0.540539
MYO1F	0.00528406	-0.540463
NUP107	0.00528666	0.540437
TMC7	0.00529768	0.540328
AC009961.3	0.00530769	0.540229
AC025766.1	0.00531311	0.540175
NEDD1	0.00531487	0.540158
OR2AP1	0.00531698	0.540137
RNF24	0.00531833	-0.540123
AC092620.1	0.0053277	-0.540031
FRG2JP	0.00533763	0.539933
DNAH14	0.00534209	0.539889
AC244636.3	0.00534339	0.539876
TMEM14A	0.00534691	0.539842
CPEB3	0.00534882	-0.539823
GEMIN2P2	0.00535032	0.539808
SBNO2	0.0053546	-0.539766
CPEB4	0.00535919	-0.539721
GMPS	0.0053733	0.539583
RNF10	0.00537603	-0.539556
DEF8	0.00538418	-0.539476
RUNX3	0.00539114	-0.539408
PHKA2-AS1	0.00539171	0.539402
DCBLD2	0.00539635	0.539357
TRAPPC13P1	0.0054168	0.539158
AL450163.1	0.00542384	0.539089
ZNF658	0.00542404	0.539087
AC025442.2	0.00542482	0.53908
EML3	0.00542673	-0.539061
AC084116.1	0.00542786	0.53905
MAPK6P1	0.0054312	0.539018
PITPNA-AS1	0.00543388	0.538992
OR8G1	0.00543846	0.538947
OTULINL	0.00544174	-0.538916
SRP9	0.0054441	0.538893
AC019197.1	0.00544518	0.538882
RF00604	0.00544581	0.538876
DYRK4	0.00545657	0.538772
AC011503.3	0.00545679	0.53877
RORA-AS1	0.00545681	0.53877
AC068725.1	0.00545897	0.538749
AC004408.1	0.00546447	0.538696
RN7SL330P	0.00547811	-0.538564
AC084211.1	0.00547962	0.538549
ZNF257	0.00548154	0.538531
MPHOSPH6	0.00549062	0.538444
UNC93B1	0.00549268	-0.538424
AC009570.1	0.00551053	0.538252
AL133372.1	0.00553186	0.538048
PARD3	0.00553351	0.538032
LINC01208	0.00553875	0.537982
ABHD10	0.00556192	0.537761
STK39	0.00557359	0.53765
FAT1	0.00557397	0.537647
PIP5K1B	0.00557474	-0.537639
DSTYK	0.00558245	-0.537566
NIFKP7	0.00558248	0.537566
AC127502.2	0.00558545	-0.537538
FAM92A1P1	0.00559067	0.537488
IL36RN	0.00561075	0.537298
DNAJC9-AS1	0.00561671	0.537242
CDKL2	0.0056185	0.537225
PCDHB5	0.00561942	0.537216
MRPL35	0.00563233	0.537095
SLCO3A1	0.00563577	-0.537062
AL133330.1	0.0056373	-0.537048
LINC01160	0.00564331	-0.536991
ATP5F1A	0.00565117	0.536918
C12orf73	0.00566984	0.536743
AL162400.3	0.00568983	0.536556
AC121761.2	0.00569629	0.536495
AL136164.3	0.00569683	0.53649
VDAC3	0.00570623	0.536403
AC233723.1	0.0057068	-0.536397
SYNE2	0.00571026	0.536365
HIST1H2AE	0.00571246	0.536345
AC090912.3	0.00571771	0.536296
MYL12B	0.00571825	0.536291
AC015871.1	0.00571995	0.536275
TSHR	0.00572177	0.536258
TGOLN2	0.00572204	-0.536256
HMGN1P35	0.00572653	0.536214
PQLC1	0.00572975	-0.536184
AL590286.2	0.00573393	0.536145
ZNF24	0.00573594	0.536127
ITGAM	0.00574537	-0.536039
PAGE4	0.00575188	0.535979
DPH6	0.00575765	0.535926
AC073548.1	0.00575818	-0.535921
AL023693.1	0.00576064	0.535898
RPL34P19	0.00576216	0.535884
RMND5A	0.00576398	0.535867
AC000367.1	0.00576593	0.535849
DCLRE1C	0.00576812	-0.535829
AC008725.1	0.00576914	0.535819
AC087893.1	0.00577079	-0.535804
NUDCD2	0.0057808	0.535712
AC034205.3	0.0057828	0.535693
VDAC1	0.00578321	0.53569
ATP10A	0.00578427	-0.53568
TUSC3	0.00578599	0.535664
LINC02482	0.00578749	0.53565
AC092079.1	0.00580237	0.535514
AC009884.1	0.00580941	0.535449
AL590867.1	0.00580941	0.535449
CNN2P12	0.00580941	0.535449
IGKV3D-25	0.00580941	0.535449
MTRNR2L13	0.00580941	0.535449
RN7SKP229	0.00580941	0.535449
RNA5SP279	0.00580941	0.535449
STK10	0.00582025	-0.53535
LINC01228	0.00582124	0.53534
GJC1	0.00583969	0.535172
UBXN10-AS1	0.00584313	0.53514
AC093799.1	0.00584326	-0.535139
FBLN7	0.00584532	0.53512
AC020719.1	0.00584894	0.535087
SLIRP	0.00585432	0.535038
OR1X5P	0.00586165	0.534971
SMIM41	0.00586548	0.534937
SNX18P26	0.00587843	0.534819
Z68694.1	0.00587843	0.534819
AC010460.2	0.00587843	0.534819
KARS	0.00588376	0.53477
LINC02013	0.00588991	0.534715
AP001341.1	0.00589061	0.534708
ROCR	0.0058966	0.534654
AC025031.4	0.0059032	0.534594
TBCK	0.00590326	0.534594
AC140912.1	0.00590867	0.534545
RPAP2	0.00591974	0.534445
ARL2BPP6	0.00592201	0.534424
RN7SL606P	0.00592232	0.534421
TIPRL	0.0059313	0.53434
RASSF10	0.00594921	0.534179
OR51B2	0.00595131	0.53416
CES5AP1	0.00595531	0.534124
AC007610.5	0.00596185	0.534066
GPC3	0.00600254	0.533701
AC007343.1	0.00600616	0.533669
SELENOKP2	0.00600616	0.533669
PHAX	0.00601435	0.533596
LSM3P4	0.00601615	0.53358
RWDD2B	0.00602925	0.533463
AC090720.1	0.00603003	0.533456
ARHGAP8	0.00603038	-0.533453
TBL1XR1	0.00603328	0.533427
CPEB2	0.00603332	-0.533427
RF00271	0.00603355	0.533425
SNORD116-5	0.0060339	0.533422
GABRG3-AS1	0.006039	0.533377
AC239804.2	0.00605605	0.533225
AEBP2	0.00605965	0.533194
COQ5	0.00606006	0.53319
HELLPAR	0.00606009	0.53319
AC093788.1	0.00606066	0.533185
DDX10	0.0060637	0.533158
SLC18B1	0.00606473	0.533149
MYH9	0.0060653	-0.533144
AC037459.2	0.00606886	-0.533112
UQCRQ	0.00607252	0.53308
AL121933.1	0.00607497	-0.533058
OXER1	0.00608744	-0.532948
AL133338.1	0.00609396	0.53289
PLXNC1	0.00609637	-0.532869
MIR4447	0.00610212	0.532819
LSM2	0.00611591	0.532697
PLAAT4	0.00611971	0.532664
AP001471.1	0.00613241	0.532552
PSMD10	0.00613682	0.532514
PROSER2	0.0061465	-0.532429
CRAT	0.00614858	-0.532411
LITAF	0.00615119	-0.532388
AC114489.1	0.00615328	0.53237
CEP97	0.00615823	0.532326
MITD1	0.00616073	0.532305
AL034376.2	0.00616166	0.532297
ZRANB3	0.00616864	0.532236
CTAGE16P	0.00617281	0.532199
SNRPB2	0.00617732	0.53216
MIR130B	0.00619401	0.532015
AC244517.1	0.00620381	0.53193
ZNF253	0.00620595	0.531911
AC079949.2	0.00620864	0.531888
RNVU1-2	0.00621469	0.531835
WHSC1L2P	0.0062188	0.531799
TMOD2	0.00622005	0.531789
MAP2K6	0.00622752	0.531724
BHLHB9P1	0.00623781	0.531635
ZNF684	0.00624747	0.531551
C11orf80	0.00625122	0.531519
AL591438.1	0.00626048	0.531439
AC010776.3	0.00626819	0.531373
AC135001.1	0.00626819	0.531373
BOLA3P1	0.00626819	0.531373
AL137026.1	0.00627061	0.531352
FAM170B	0.00627728	0.531295
AC245748.3	0.00628042	0.531268
AP001372.1	0.00628388	0.531238
KRBOX4	0.00630213	0.531081
AC090643.2	0.00630268	0.531077
TRAJ11	0.00630899	0.531023
AC009158.1	0.00632657	0.530872
AL049697.3	0.00632911	0.530851
RNU11-3P	0.00632998	0.530843
KCTD21-AS1	0.00633093	0.530835
AC093835.1	0.00633188	0.530827
AC012409.2	0.00633558	0.530795
CD300LF	0.00633917	-0.530765
ATF2	0.00634678	0.5307
LPXN	0.00635704	0.530613
SNRPD2	0.00637028	0.5305
KIF27	0.00637929	0.530424
AC010163.1	0.00641273	0.530141
AL596223.1	0.00641525	0.530119
BX284656.1	0.0064178	0.530098
NUPL2	0.00642014	0.530078
RPS7P8	0.00643532	0.52995
IQCM	0.00644025	0.529909
AC096632.1	0.00644076	0.529904
SERPINF1	0.00644308	0.529885
NOL11	0.0064507	0.529821
CYCSP27	0.00645257	0.529805
AC099520.1	0.006456	0.529776
RPL10	0.0064584	0.529756
CEP63	0.00646202	0.529726
MMAB	0.0064668	0.529686
AC018653.1	0.00647635	0.529606
ADCY4	0.00648309	-0.529549
OST4	0.00648494	0.529534
CASP7	0.0064909	0.529484
CSTF3	0.00649156	0.529478
FAR2P4	0.006495	0.52945
AC019068.1	0.00649694	0.529433
LINC01568	0.00652016	0.52924
AC104071.1	0.00652522	0.529198
SMIM8	0.00652776	0.529177
TMUB2	0.00653625	-0.529106
NDUFA6	0.00654054	0.52907
AC087857.1	0.00654686	0.529018
WNT2	0.00655038	0.528989
RNA5SP192	0.00655446	0.528955
RPS23P1	0.00656661	0.528854
RAB6B	0.00657319	-0.5288
PHLPP1	0.00657868	-0.528754
MIR4632	0.00657921	-0.52875
NAP1L4P1	0.0065871	-0.528685
HIST1H4B	0.00660137	0.528567
RPF2	0.00662266	0.528392
HIST1H2AG	0.00663799	0.528266
SLC34A2	0.00664317	0.528223
AL354674.1	0.00664415	0.528215
OR1L8	0.00664601	-0.5282
DHRS1	0.00666573	-0.528039
OPTC	0.00666655	0.528032
WDR72	0.00667239	0.527984
Z98257.2	0.00667763	0.527941
LPCAT2	0.00668807	-0.527856
NSA2	0.00669178	0.527826
OR4C1P	0.00669446	0.527804
ZNF420	0.00670122	0.527749
GALNT9	0.00670257	0.527738
C12orf80	0.006705	0.527718
AC005144.1	0.00670866	0.527689
AC004233.3	0.00671451	-0.527641
ANKIB1	0.00672315	0.527571
DOP1B	0.00672404	-0.527564
MRFAP1L1	0.00672904	0.527523
ZNF559	0.00673102	0.527507
SNHG30	0.00673179	0.527501
AC090559.1	0.00673211	-0.527498
IGFBP7	0.00674044	-0.527431
AC138932.2	0.00674625	-0.527384
TMA7	0.00675005	0.527353
ARAP1	0.00675599	-0.527305
MAP3K14	0.00676447	-0.527236
NPTN	0.0067799	-0.527112
LARP1BP1	0.00679221	0.527013
RIPOR1	0.00680553	-0.526906
AC068790.6	0.00680798	0.526886
AC121334.4	0.00681197	0.526854
LINC00229	0.00681966	0.526792
PIWIL3	0.0068268	0.526735
SNHG6	0.00682689	0.526734
TTI2	0.0068302	0.526708
JAK1	0.00683157	-0.526697
PHF12	0.00684025	-0.526627
LRRC8C-DT	0.00684555	-0.526585
CDH26	0.00685953	-0.526473
AL138878.2	0.00686202	0.526453
AL158850.1	0.00686273	0.526448
RNA5SP273	0.0068725	0.52637
AL117339.1	0.00688217	0.526293
AC007064.2	0.00688897	0.526239
AC005747.1	0.00689436	-0.526196
AL354919.1	0.00690104	0.526143
RAX	0.0069015	0.526139
RPL7P34	0.00690668	0.526098
ATP23	0.00690885	0.526081
WIPI1	0.00691094	-0.526064
LINC01775	0.00691226	0.526054
NFIX	0.00692694	-0.525938
EXOSC1	0.0069348	0.525875
AC012038.1	0.00694433	0.5258
AC012501.2	0.00694433	0.5258
AC140125.2	0.00694945	0.52576
LINC02265	0.00695518	0.525714
MIR4453HG	0.00696738	0.525618
TRIM39	0.00697363	-0.525569
AL359317.2	0.00697814	0.525534
LINC02179	0.00697861	0.52553
GEMIN6	0.00698757	0.525459
HNRNPA1P29	0.0070005	0.525358
LINC01788	0.00701374	0.525254
ERH	0.00702229	0.525187
PPIL3	0.00702888	0.525135
ZNF627	0.00702945	0.525131
AC005828.7	0.00703289	0.525104
NACAP6	0.00703769	0.525067
[truncated: 51,994 more rows]

## Sheet: AC002454.1
.id	p.value	R
AC002454.1	4.59478e-178	1
AC008088.1	1.48968e-09	0.895514
SERPINE2	3.4586e-09	0.88716
CICP17	6.12939e-09	0.881084
SNORD38A	2.64162e-07	0.83133
KANK4	2.70867e-07	0.830931
RNA5SP495	4.89472e-07	0.821218
SCGB3A1	5.36281e-07	0.819666
BEND6	9.12876e-07	0.810322
PCLAF	9.40428e-07	0.809784
RPSAP47	1.01137e-06	0.808461
AC244502.1	1.05966e-06	0.807608
TOMM22P6	1.25773e-06	0.804435
AL589743.1	1.35762e-06	0.803002
CEP70	1.54077e-06	0.800603
RHOBTB1	2.26468e-06	0.793099
WWTR1	2.53169e-06	0.790869
AC104634.1	3.40743e-06	0.784793
RIBC2	3.94877e-06	0.781705
FERMT1	4.3098e-06	0.779848
AL355297.2	4.36815e-06	0.779561
BACE2	4.75965e-06	0.77772
SLC22A6	4.96908e-06	0.77679
OR7G2	5.37597e-06	0.775078
AL035603.1	5.70576e-06	0.773774
DARS	5.81119e-06	0.773371
AL121782.1	6.28681e-06	0.771631
CMAHP	7.58644e-06	0.767412
TCEAL1	8.28341e-06	0.765408
PHF21B	8.60487e-06	0.764534
AC123912.4	9.48193e-06	0.762289
AC010173.1	9.81494e-06	0.761485
AL079301.1	1.00532e-05	0.760925
RNA5SP112	1.11198e-05	0.758551
ALDH7A1	1.23942e-05	0.755967
AL356055.1	1.24661e-05	0.755828
APOL4	1.27849e-05	0.755222
RGPD2	1.41924e-05	0.752696
SMG1P6	1.44049e-05	0.752334
APOO	1.45869e-05	0.752028
ABCC8	1.46339e-05	0.751949
RNA5SP350	1.48564e-05	0.751581
LINC02088	1.52859e-05	0.750883
HNRNPA1P24	1.64667e-05	0.749049
TRGV8	1.64877e-05	0.749018
GSTO1	1.75913e-05	0.747409
CSNK1G1	2.57956e-05	0.737655
AL449363.1	2.61353e-05	0.737314
MSMP	2.74089e-05	0.73607
MDH1B	2.76425e-05	0.735847
AC007450.1	2.80641e-05	0.735449
AL591846.1	2.95738e-05	0.734067
AC090825.2	3.13044e-05	0.732558
PARP4P1	3.36836e-05	0.730599
AC010991.1	3.47096e-05	0.729791
AC145350.2	3.48589e-05	0.729676
HDX	3.56651e-05	0.729058
RPL31	3.6064e-05	0.728757
LAMP5	3.61406e-05	0.7287
RNA5SP362	3.77695e-05	0.727503
RNU2-17P	3.93221e-05	0.726404
AC025183.1	4.33256e-05	0.723738
AC007099.2	4.35928e-05	0.723567
TRGC2	4.37773e-05	0.723451
AC026461.4	4.52137e-05	0.722555
AL391840.1	4.53454e-05	0.722474
OR8K1	4.664e-05	0.72169
SLC44A1	5.00227e-05	0.719728
MDM1	5.08606e-05	0.719261
AC016769.2	5.5052e-05	0.717018
AL158211.2	5.6915e-05	0.716069
ABCC6P2	5.71684e-05	0.715942
CFAP20	5.8406e-05	0.71533
RNU1-114P	5.91708e-05	0.714957
RNU6-371P	5.91708e-05	0.714957
TRDD2	5.91708e-05	0.714957
AC005094.1	5.91708e-05	0.714957
AC006357.1	5.91708e-05	0.714957
AC007967.4	5.91708e-05	0.714957
AC018554.1	5.91708e-05	0.714957
AC073476.2	5.91708e-05	0.714957
AC092725.1	5.91708e-05	0.714957
AC103724.1	5.91708e-05	0.714957
AC107399.1	5.91708e-05	0.714957
AL049564.1	5.91708e-05	0.714957
AL109618.3	5.91708e-05	0.714957
AL121885.3	5.91708e-05	0.714957
AL161447.2	5.91708e-05	0.714957
AL162376.1	5.91708e-05	0.714957
AL163195.3	5.91708e-05	0.714957
AP003789.1	5.91708e-05	0.714957
ATP5PDP3	5.91708e-05	0.714957
FP325318.1	5.91708e-05	0.714957
IFNWP19	5.91708e-05	0.714957
KRT18P2	5.91708e-05	0.714957
LINC01038	5.91708e-05	0.714957
LINC01386	5.91708e-05	0.714957
MIR3929	5.91708e-05	0.714957
MIR4636	5.91708e-05	0.714957
MIR4752	5.91708e-05	0.714957
MIR500B	5.91708e-05	0.714957
OR10J6P	5.91708e-05	0.714957
OR7E53P	5.91708e-05	0.714957
PHBP15	5.91708e-05	0.714957
PRAMEF19	5.91708e-05	0.714957
RN7SKP161	5.91708e-05	0.714957
RN7SL636P	5.91708e-05	0.714957
RN7SL675P	5.91708e-05	0.714957
RNA5SP125	5.91708e-05	0.714957
RNA5SP90	5.91708e-05	0.714957
RNU4-92P	5.91708e-05	0.714957
RNU6-1193P	5.91708e-05	0.714957
RNU6-351P	5.91708e-05	0.714957
RNU6-478P	5.91708e-05	0.714957
RNU6-630P	5.91708e-05	0.714957
RNU6-649P	5.91708e-05	0.714957
RNU7-128P	5.91708e-05	0.714957
RPL21P47	5.91708e-05	0.714957
RPL26P34	5.91708e-05	0.714957
RPL36P1	5.91708e-05	0.714957
RPSAP27	5.91708e-05	0.714957
TTTY1	5.91708e-05	0.714957
Z99497.2	5.91708e-05	0.714957
AL158211.4	6.23597e-05	0.713446
USP1	6.43346e-05	0.712544
LINC01111	6.73151e-05	0.711228
AC091179.1	6.84901e-05	0.710723
MED28P6	7.14001e-05	0.709505
CCL21	7.71409e-05	0.707225
GPN3P1	7.71409e-05	0.707225
LINC01526	7.71409e-05	0.707225
MIR539	7.71409e-05	0.707225
RN7SKP33	7.71409e-05	0.707225
RPL23AP62	7.71409e-05	0.707225
AC137761.1	7.71409e-05	0.707225
AC099063.1	7.71673e-05	0.707215
IGHV1OR16-2	7.94927e-05	0.706334
BMS1P8	7.97883e-05	0.706224
MLLT3	8.03954e-05	0.705998
RNA5SP295	8.10904e-05	0.705742
CPA6	8.11915e-05	0.705705
RAB23	8.28414e-05	0.705105
AP1S1	8.60491e-05	0.703967
AC104073.1	8.74982e-05	0.703466
LINC02542	8.99545e-05	0.702632
LDHA	9.40432e-05	0.701287
AC034228.1	9.50959e-05	0.700949
SSX2	9.50959e-05	0.700949
NTRK3	9.69367e-05	0.700366
BACE2-IT1	9.80523e-05	0.700017
RFC3	9.86154e-05	0.699843
VSTM4	0.000100032	0.699407
PDCL	0.000100045	0.699403
RNA5SP211	0.000102095	0.698783
RMND1	0.000102547	0.698647
AC051619.2	0.000102741	0.698589
AL008733.1	0.000102741	0.698589
RNA5SP536	0.000104087	0.69819
LDHC	0.000111714	0.696009
MRPL42	0.000111824	0.695979
RPS18	0.000111923	0.695951
CCDC88A	0.000112682	0.695742
ZRANB2	0.000112914	0.695678
RFPL4AL1	0.000114899	0.695137
ARHGAP5-AS1	0.000118114	0.694278
SLC39A8	0.000120952	0.693536
SSC4D	0.000121318	0.693442
HPRT1	0.000122249	0.693202
RPS14P8	0.000123272	0.692941
BAG2	0.000125011	0.692502
AL050320.1	0.00012711	0.691978
AC010328.1	0.000127699	0.691833
CCDC144B	0.000129381	0.69142
HLF	0.000130811	0.691074
RNU6-806P	0.000133329	0.690471
EGR4	0.000138918	0.689168
RNU6-520P	0.000141639	0.68855
PAN3-AS1	0.00014391	0.688042
TMEM254	0.00014421	0.687976
AC027031.1	0.000147514	0.687251
AC069061.1	0.000147514	0.687251
AC236972.3	0.000147514	0.687251
AP000696.3	0.000147514	0.687251
RPL3L	0.000150068	0.6867
SVIP	0.0001505	0.686608
FOXI2	0.000152898	0.686099
TMEM14A	0.000153277	0.68602
HIGD1A	0.000157117	0.685222
ENPP2	0.000159791	0.684676
RCN2	0.000170012	0.682662
ARRDC4	0.00017048	0.682572
STS	0.000171817	0.682317
JCHAINP1	0.000174009	0.681903
LINC01477	0.000174009	0.681903
AC084373.1	0.000174673	0.681778
AL022099.1	0.000174673	0.681778
AL590623.1	0.000174673	0.681778
LINC02470	0.000180115	0.680772
AP006545.2	0.000180854	0.680637
AC067945.4	0.000181356	0.680546
AP001148.1	0.000181612	0.6805
RNA5SP131	0.000182568	0.680327
SRR	0.000182799	0.680286
BMI1	0.000191438	0.678761
WWTR1-IT1	0.000193594	0.67839
IL10	0.000201301	0.677093
RPL34	0.000201879	0.676998
RPL35A	0.000202914	0.676827
PCGF2	0.000205306	0.676436
RPL10P9	0.000208068	0.675989
TMEM14B	0.000209206	0.675807
TPRKB	0.000210407	0.675615
CENPS	0.000212404	0.675299
RNA5SP450	0.00021407	0.675036
SRBD1	0.000218077	0.674413
DSEL	0.000219469	0.674199
FHL1	0.000221812	0.673841
MSRB3	0.000226676	0.673109
AC090348.1	0.000227621	0.672968
RPS29	0.000229151	0.672741
RPS23	0.000230521	0.672539
AL359697.1	0.000233315	0.672131
RPL39	0.000235324	0.67184
AC010132.1	0.000241056	0.671021
AC087273.1	0.000241056	0.671021
AC112211.1	0.000241056	0.671021
FAR1P1	0.000241056	0.671021
RN7SL620P	0.000241056	0.671021
ZNF970P	0.000241056	0.671021
LINC01722	0.000247156	0.670168
CAPNS1P1	0.000252567	0.669427
SLC10A5	0.000253457	0.669306
AL161640.3	0.000255052	0.669091
SLC4A4	0.000256434	0.668905
SNRPCP3	0.000260417	0.668375
CLEC2A	0.000262493	0.668102
HIST1H2BJ	0.000277708	0.666154
AL133444.1	0.000284741	0.665285
AC092675.1	0.000284849	0.665272
CAND2	0.000285807	0.665155
MIR3117	0.000287976	0.664892
AL589693.1	0.000296075	0.663923
AC245036.1	0.000296684	0.663851
RAD51AP1	0.000297289	0.66378
DES	0.000304136	0.662982
PTGER3	0.000306763	0.66268
AL358780.1	0.000306995	0.662653
RNA5SP343	0.000311057	0.662191
CLEC2B	0.000311136	0.662182
TMEM14C	0.000312931	0.661979
NPM1	0.000313212	0.661948
AC079148.2	0.000313952	0.661865
AC091304.3	0.000318259	0.661384
NIT2	0.00031867	0.661338
GRIK4	0.000320085	0.661182
HIST2H2AB	0.000335554	0.659509
SNRPG	0.00033719	0.659336
SAXO2	0.000338563	0.659192
CD109	0.000343502	0.658676
DEFB131E	0.00034606	0.658411
ANO5	0.000348609	0.658149
LUZP2	0.000355964	0.657403
DISP3	0.000359256	0.657073
AL512882.1	0.000359818	0.657017
RNU6-362P	0.000359818	0.657017
HMGN3	0.000360722	0.656927
HYI	0.000363686	0.656633
NIPSNAP3A	0.000373658	0.655659
AC243919.1	0.000375592	0.655473
ARL6IP1	0.000380351	0.655019
MTBP	0.000384466	0.65463
AC079089.3	0.000392835	0.65385
AL049869.2	0.000392835	0.65385
AL512785.1	0.000392835	0.65385
ARL6IP1P1	0.000392835	0.65385
HMGN1P19	0.000392835	0.65385
NTAN1P3	0.000392835	0.65385
RNA5SP308	0.000392835	0.65385
AL139142.2	0.000396583	0.653505
LINC01090	0.000398686	0.653313
AC025434.1	0.000401151	0.653089
RPL14	0.000404374	0.652798
RPL37A	0.00040624	0.65263
HLTF	0.000407118	0.652551
AC022118.1	0.000408959	0.652387
AL031429.2	0.000413822	0.651955
CCNG1	0.000424924	0.650987
AL451007.2	0.000434996	0.650127
SSX8P	0.000440618	0.649654
LINC01432	0.00044456	0.649326
AC112498.1	0.000445241	0.64927
AL589743.7	0.00044579	0.649224
ATE1	0.000468433	0.647391
AC010385.2	0.000470022	0.647265
LCA5	0.000470985	0.647189
HIST2H2AC	0.00047245	0.647074
MIR155HG	0.000478916	0.646568
RPS24	0.000484966	0.646101
AC012378.2	0.000485173	0.646085
TASP1	0.00048779	0.645884
CLDN5	0.000488054	0.645864
AGPS	0.000488607	0.645821
HOXA11-AS	0.000488938	0.645796
AF212831.1	0.000501315	0.644861
HIST2H3D	0.000502033	0.644808
PSIP1	0.000503042	0.644733
ARMCX1	0.000509417	0.64426
HIST1H2AH	0.000512041	0.644067
REXO5	0.000514167	0.643912
LINC00428	0.000520081	0.643482
COMMD3	0.000538565	0.642164
STAC	0.00054665	0.6416
PLA2G1B	0.000562073	0.640544
AC011468.2	0.000573976	0.639746
DNAJC1	0.000575228	0.639663
AL163973.2	0.000576344	0.639589
SNORA63C	0.000576896	0.639553
PIEZO2	0.000578504	0.639447
SOD1	0.000582475	0.639185
AP003718.1	0.000593619	0.63846
AL138963.3	0.000597123	0.638235
PMS2P2	0.000599826	0.638062
HAUS6P3	0.000605332	0.637711
PYURF	0.000605585	0.637695
AC090625.2	0.000608946	0.637482
RPL32	0.000609186	0.637467
AC104779.1	0.000619005	0.636852
HBE1	0.000619005	0.636852
ZNF706	0.000624528	0.63651
KRT5	0.00062464	0.636503
DDX1	0.00062811	0.636289
RPL24	0.000642137	0.635436
LINC02286	0.000650846	0.634914
AC092376.1	0.000651113	0.634898
AL356488.2	0.000651113	0.634898
GLO1	0.000652266	0.634829
RPL23A	0.000652767	0.634799
CTHRC1	0.000659354	0.63441
SOCS2	0.000661126	0.634305
CTDSPL2	0.000663306	0.634177
RPL12	0.000665428	0.634053
DUT	0.000669353	0.633824
C11orf1	0.00067524	0.633483
AC098487.1	0.000679207	0.633255
PPIAP39	0.000692257	0.632512
FAM162A	0.000693277	0.632454
RNA5SP353	0.000696375	0.63228
MEAF6	0.000698096	0.632183
AC073848.1	0.000701831	0.631974
AC116407.2	0.000706068	0.631739
TP63	0.000712217	0.631399
PMAIP1	0.000714298	0.631284
CMA1	0.000721409	0.630895
LINC02310	0.000741774	0.629798
MIR153-1	0.000741774	0.629798
IFITM1	0.000744999	0.629627
LINC00951	0.000754583	0.629122
EIF3M	0.000760854	0.628794
AC090092.1	0.000770417	0.628299
OR7E145P	0.000774808	0.628074
VBP1	0.000777533	0.627934
BTF3L4	0.000781791	0.627718
RAB11A	0.000788107	0.627398
SGIP1	0.000795407	0.62703
HIST1H2AG	0.000799906	0.626806
AC104071.1	0.000800309	0.626786
RPS26	0.000801771	0.626713
KTN1	0.000820814	0.625775
MIR944	0.000824634	0.625589
CFTRP1	0.0008306	0.625301
RNU6-1270P	0.000836852	0.625
AL513128.1	0.000839792	0.624859
FXR1	0.0008478	0.624478
LINC01585	0.000849196	0.624412
PAIP2	0.000853655	0.624202
STT3B	0.00085779	0.624007
AL133173.1	0.000865947	0.623626
CLECL1	0.000869183	0.623476
SLC4A7	0.000869757	0.623449
WWC2-AS1	0.000873252	0.623287
ZNF620	0.000877366	0.623098
AC245519.1	0.000880465	0.622955
SNORA15	0.00088128	0.622918
SNX7	0.000907186	0.621745
AL133215.2	0.000910577	0.621594
HOXA10	0.000917416	0.62129
AC002464.1	0.000920757	0.621142
AC104136.1	0.000932836	0.620612
AC108037.1	0.000932836	0.620612
ZMYM1	0.000956165	0.619605
CDC5L	0.000961716	0.619368
TLR3	0.000973417	0.618874
MNAT1	0.00097688	0.618728
RNA5SP166	0.00097785	0.618687
PTHLH	0.000978097	0.618677
MIR5582	0.000979415	0.618622
PTPN20CP	0.000980976	0.618557
HIST1H4C	0.000983268	0.618461
MIR6796	0.00098641	0.61833
CLEC12B	0.000993908	0.618019
RNA5SP437	0.00101621	0.617106
NUP58	0.001017	0.617074
AC139491.1	0.001026	0.616711
AC022726.2	0.0010286	0.616607
TCEAL3	0.00103145	0.616493
PGAP1	0.00104147	0.616093
XCL1	0.00104209	0.616069
AC068254.2	0.00104684	0.615881
SUMO2	0.00105603	0.615519
AC007463.1	0.00105938	0.615388
MAGOH	0.00106505	0.615167
RTN4	0.00107379	0.614827
AL162742.1	0.00107399	0.61482
RN7SKP245	0.00107399	0.61482
AC023813.1	0.00107566	0.614755
RF01992	0.00108084	0.614556
AC002470.1	0.00109366	0.614065
HMGB1	0.00109368	0.614065
RNA5S9	0.00109534	0.614002
RPA3	0.00109659	0.613954
CCT2	0.00109825	0.613891
AL357054.5	0.00109855	0.61388
CCNJP2	0.00109855	0.61388
NTSR2	0.00109855	0.61388
RNU4-49P	0.00109855	0.61388
RNU6-514P	0.00109855	0.61388
RPS3A	0.00110524	0.613627
FAM106A	0.00110791	0.613526
RPL3P4	0.00110973	0.613458
HAUS4	0.00111772	0.613159
C11orf74	0.00112124	0.613027
PHIP	0.00112227	0.612989
CKAP2	0.00112536	0.612874
C1orf54	0.00112758	0.612792
GIHCG	0.00113297	0.612592
RPL7	0.00115716	0.611708
IAH1	0.00117243	0.611157
AK2	0.00117949	0.610905
COX17P1	0.00117964	0.610899
SF3B6	0.00118712	0.610634
RBBP9	0.00119532	0.610344
HOXA11	0.00119845	0.610234
IDH1-AS1	0.00121298	0.609725
SNORA41B	0.00122092	0.60945
PRELID2	0.00122348	0.609361
KRT8P1	0.00122842	0.609191
AL450992.3	0.00123184	0.609073
MORF4L2	0.00123614	0.608926
RNU6-881P	0.00123679	0.608903
CLEC12A-AS1	0.00125117	0.608414
HIST1H1T	0.00125129	0.60841
MT1E	0.00127597	0.60758
AL118505.1	0.00128451	0.607297
CYCSP23	0.0012916	0.607062
PCMT1	0.00129952	0.606802
SNRPE	0.00130333	0.606677
TRGJ2	0.00131802	0.606199
RPL41	0.0013327	0.605725
MIR511	0.00134075	0.605467
SMIM19	0.00136918	0.604568
HAT1	0.00136991	0.604545
DCUN1D4	0.0013829	0.60414
LINC01153	0.00138429	0.604096
COPS4	0.00140259	0.603531
BMS1P16	0.0014037	0.603497
AL049748.1	0.00140826	0.603357
SNORD114-21	0.00141003	0.603303
SNHG6	0.00142808	0.602754
AC026316.2	0.0014356	0.602527
HINT1	0.00144787	0.602159
KRT18P60	0.0014586	0.601839
LRRC37A13P	0.0014586	0.601839
CENPW	0.00145909	0.601825
AC139099.2	0.00147291	0.601416
AC008972.1	0.00149094	0.600888
AL049634.3	0.00149094	0.600888
HMGB2	0.00149102	0.600885
LINC02517	0.00150039	0.600613
LRRC70	0.00150313	0.600534
HIST1H3C	0.00151944	0.600063
AC011479.4	0.00153045	0.599749
IPO5	0.00154179	0.599427
CBWD2	0.00156517	0.598769
AC005786.1	0.00156706	0.598716
AC114760.1	0.00157151	0.598592
COX14	0.0015719	0.598581
LINC02553	0.00157745	0.598427
RPS12	0.00158055	0.59834
ZNF22	0.00159017	0.598074
NUP155	0.00159232	0.598015
AC211485.1	0.00159242	0.598012
AC131238.1	0.00159618	0.597909
NDUFB2	0.00160987	0.597534
ARL6IP6	0.00161132	0.597495
THOC7	0.00161393	0.597423
RNA5SP202	0.00161833	0.597304
HIST1H4A	0.00163625	0.596819
RPS14	0.00165724	0.596257
DYNLT3	0.00168724	0.595465
AL034550.3	0.00168817	0.59544
TMEM171	0.00169473	0.595269
HIST1H4B	0.00170099	0.595105
TRGJP	0.00171166	0.594828
CIP2A	0.00172333	0.594527
AC068630.1	0.00173471	0.594235
AC090152.1	0.0017499	0.593847
AC022447.4	0.00176517	0.593461
CAMLG	0.00176653	0.593427
EEF1B2	0.0017696	0.593349
MYOZ1	0.00178596	0.592939
CFH	0.00179013	0.592835
NAE1	0.00179683	0.592668
TTF1	0.00180307	0.592514
AC074050.3	0.0018068	0.592422
ANKRD45	0.00180703	0.592416
RPL15	0.00180955	0.592354
HSPB11	0.0018248	0.591978
TWIST1	0.00182849	0.591888
NACA	0.00183261	0.591787
MPP5	0.00183493	0.591731
AL356310.1	0.00186782	0.590934
AC011487.1	0.00187047	0.590871
AC006213.5	0.00187798	0.590691
RPS25	0.00188423	0.590541
AL049767.1	0.0019247	0.589585
AC006004.1	0.00195029	0.588989
HMGN1P13	0.00195162	0.588958
AL357835.1	0.00195715	0.58883
LIN9	0.00199842	0.587886
EIF2A	0.00200082	0.587832
AC092447.8	0.00200968	0.587631
AKAP7	0.00201972	0.587405
SNX33P1	0.00202101	0.587376
HIST1H2AC	0.00202444	0.587299
MIR873	0.00202819	0.587215
ESCO2	0.00205929	0.586523
KLHDC1	0.00205992	0.586509
EIF3E	0.00208253	0.586012
ICA1	0.00209746	0.585686
UQCRQ	0.00210705	0.585478
IFI6	0.00210746	0.585469
RNA5SP141	0.00211565	0.585292
AL162388.2	0.00212295	0.585134
TCEAL4	0.00212314	0.58513
ZWILCH	0.00212542	0.585081
AC026347.1	0.00213208	0.584938
ERH	0.00213664	0.58484
PRDX3	0.00213869	0.584796
AL031291.1	0.0021434	0.584696
IFT52	0.0021539	0.584472
KPNA2	0.00215658	0.584415
MT-CO3	0.00216627	0.584209
SCGB1D4	0.00217141	0.584101
ARL5B	0.00218022	0.583915
ICOS	0.00219723	0.583558
AL365357.1	0.00219779	0.583546
SUGT1	0.00219978	0.583505
SKIDA1	0.00222206	0.583041
MPHOSPH9	0.00223021	0.582872
DNAJC19	0.00223149	0.582846
ELOVL5	0.00223441	0.582786
RNA5SP371	0.00226906	0.582076
TUBA1A	0.00228432	0.581767
EIF1AX	0.00228606	0.581731
HOXA7	0.00230492	0.581351
SYPL1	0.00231465	0.581156
TRMT10C	0.00233199	0.580811
FAM215A	0.00233238	0.580803
TRDD1	0.00233676	0.580716
AL022323.5	0.00235824	0.580291
ISCA1P4	0.00235824	0.580291
PDIK1L	0.00237877	0.579889
ALDH7A1P2	0.00238251	0.579815
ZNF713	0.00238326	0.579801
NUDT21	0.00239765	0.579521
MMAB	0.00239859	0.579503
USP12-AS1	0.00239952	0.579485
HIST1H3A	0.00240104	0.579455
AP000526.1	0.00240232	0.57943
CNIH1	0.00241771	0.579133
MIR3685	0.00242221	0.579046
GTF3A	0.00243929	0.578719
NREP	0.00244423	0.578624
AC098614.2	0.00245449	0.578428
AC072022.2	0.00245906	0.578341
PPIG	0.00246963	0.578141
TIMM9	0.00249226	0.577714
LAMP5-AS1	0.00251194	0.577346
GMFBP1	0.00251724	0.577247
TRGV10	0.00251859	0.577222
SLC39A10	0.00251918	0.577211
NMI	0.00252451	0.577112
NAA38	0.00254072	0.576812
PSMC1P5	0.00254897	0.576659
BX323043.1	0.00255922	0.576471
AL356317.2	0.00256753	0.576319
AC091814.1	0.0025842	0.576014
BUB3	0.00260959	0.575554
ARMCX2	0.0026238	0.575298
AARD	0.00262461	0.575283
CKS2	0.00263172	0.575155
RPL41P1	0.0026357	0.575084
AL691515.1	0.0026471	0.57488
FKBP3	0.00265263	0.574782
CNKSR2	0.00266677	0.57453
UGP2	0.00268523	0.574204
RPS13	0.00268855	0.574146
TRBV8-1	0.002702	0.573909
AC092053.4	0.00270231	0.573904
C12orf76	0.00270477	0.573861
CKS1B	0.00271693	0.573648
CBR3	0.00272002	0.573594
FAM111B	0.00272657	0.57348
AL645933.2	0.00274246	0.573204
AL139275.1	0.0027548	0.572991
RPL30	0.00276303	0.572849
AC116609.2	0.00276483	0.572819
AC004948.1	0.0027701	0.572728
PRIM1	0.00278996	0.572388
PDS5B	0.00279147	0.572362
BZW2	0.00279534	0.572296
TMEM256	0.00279971	0.572222
AC008115.1	0.00280221	0.572179
PAICS	0.00282861	0.571732
AL022162.1	0.00283194	0.571676
NSA2	0.00283873	0.571562
ZNF548	0.00288594	0.570774
RPL11	0.002892	0.570674
AL160410.1	0.00289912	0.570556
AC073508.2	0.00289948	0.57055
CDKAL1	0.00290825	0.570405
HTATSF1	0.00291567	0.570283
AC020741.1	0.0029225	0.570171
RAB28	0.002964	0.569495
UQCRH	0.00297386	0.569335
SLC25A21	0.00299024	0.569071
AC073869.3	0.00301355	0.568697
GTF2H2B	0.00302033	0.568589
AC007099.1	0.00303674	0.568328
AL391152.1	0.0030382	0.568305
SYNCRIP	0.0030583	0.567987
NPM1P6	0.00306535	0.567875
ATP5MC2	0.00306623	0.567862
NPPB	0.003097	0.567379
AC004936.1	0.00311156	0.567152
MED28P1	0.00311361	0.567121
PCGF7P	0.00313089	0.566853
ENOX1	0.00314621	0.566616
NIFKP1	0.00316823	0.566278
MAST4-IT1	0.00318037	0.566092
BMS1P7	0.00319098	0.565931
RPL35	0.00319392	0.565886
PARPBP	0.00320523	0.565714
RPS15A	0.00322551	0.565407
EPCAM	0.00323865	0.56521
RPS27A	0.00324186	0.565161
CCT8	0.00325269	0.564999
COX8C	0.00325649	0.564942
HNRNPDP1	0.00327196	0.564711
ITGB3BP	0.00330458	0.564227
IGKV2-14	0.00331087	0.564134
TXN	0.00332	0.564
WIZP1	0.00332236	0.563965
LY86-AS1	0.00332887	0.563869
MRPS35	0.00332894	0.563868
HIST1H2BK	0.00334225	0.563673
SS18L2	0.0033525	0.563523
CEP290	0.00337695	0.563168
NDUFB6	0.00339281	0.562938
RGS1	0.003449	0.562132
IMPA1	0.00347432	0.561772
EBPL	0.00350482	0.561342
COX7A2L	0.00352044	0.561123
SPC24	0.00352783	0.561019
SNRPD1	0.00356423	0.560513
SNORA12	0.00357603	0.560349
EGOT	0.00358876	0.560174
MYOC	0.00359474	0.560091
PDGFRB	0.00360595	0.559937
DUSP21	0.0036138	0.55983
RBBP8	0.00361585	0.559802
HAUS1	0.00364355	0.559424
RNA5SP33	0.00364448	0.559411
OR4A4P	0.00365153	0.559315
AL645728.2	0.00366654	0.559112
MAS1L	0.00367493	0.558999
TXNDC17	0.00367753	0.558963
RNU6-63P	0.00369514	0.558726
CENPK	0.00371043	0.558521
RPS21	0.00372151	0.558373
CCDC175	0.00374021	0.558124
DDX50	0.00374535	0.558055
AL391987.4	0.00376383	0.55781
RNA5SP428	0.00383209	0.556914
AC010494.1	0.0038405	0.556804
NUCKS1	0.00385255	0.556648
AC092349.1	0.00385808	0.556576
RNA5SP352	0.00386985	0.556424
AL096861.1	0.00388652	0.556209
RNU6-955P	0.00388652	0.556209
CCDC171	0.00389058	0.556157
RNU6-798P	0.00389225	0.556135
TXNDC16	0.00392074	0.55577
KRT13	0.00392433	0.555724
KYAT3	0.00393322	0.555611
ATP5MD	0.00394047	0.555518
HES1	0.00396943	0.555151
ORC4	0.00400145	0.554747
TRGJ1	0.0040211	0.554501
WDR36	0.0040284	0.554409
AL133257.1	0.00403333	0.554348
RPL10A	0.00403386	0.554341
DPYD	0.00403938	0.554272
SUZ12	0.00405104	0.554127
EEF1A1	0.00405467	0.554082
CDK6	0.00406249	0.553985
NUCB2	0.00407109	0.553878
CETN2	0.00410547	0.553454
HMGB1P6	0.00410996	0.553399
NF1P12	0.00411273	0.553365
MBNL1	0.00413185	0.553131
ZNF426-DT	0.0041319	0.55313
RN7SKP11	0.00416376	0.552742
AC113403.1	0.00417241	0.552637
PPIAP8	0.00422971	0.551946
MIS12	0.00425722	0.551617
AL031293.1	0.00426263	0.551553
BARD1	0.00428154	0.551328
RIF1	0.00428371	0.551302
PLCB1-IT1	0.00430275	0.551077
TBC1D3P6	0.00432881	0.55077
ETFA	0.00433773	0.550665
LINC00434	0.00435189	0.550499
AC233968.1	0.00436296	0.55037
RNU7-13P	0.00438774	0.550081
HMGCR	0.00438932	0.550062
HIST1H2AB	0.00441681	0.549744
MIR1293	0.00448548	0.548955
AC137579.1	0.00452208	0.548539
AC020658.7	0.00453418	0.548402
AC009120.4	0.00455518	0.548166
TBCA	0.00457494	0.547943
MRPL30	0.00457889	0.547899
NDUFS5	0.00458137	0.547871
ZNF155	0.00458467	0.547834
IPO11	0.0045895	0.54778
RPL29	0.00460054	0.547657
AL135744.1	0.0046042	0.547616
AKAP5	0.00464841	0.547125
ZNF221	0.00467706	0.546808
ZBTB8A	0.00468582	0.546712
ARMCX6	0.00475623	0.545943
MORC4	0.00476662	0.54583
SOCS5	0.00479255	0.54555
MRPL1	0.00479784	0.545493
RPL12P36	0.00481687	0.545288
CDK1	0.00482022	0.545252
AC007620.1	0.00483943	0.545046
AC125634.1	0.00486367	0.544787
DHFRP2	0.00488401	0.544571
CBX3	0.00490851	0.544311
COX6CP16	0.00492846	0.544101
IL31RA	0.00494073	0.543971
ATP5PF	0.00496912	0.543674
SNRPB2	0.00501259	0.543221
AC145423.2	0.00501447	0.543201
PHF5A	0.00503422	0.542996
DEPDC1B	0.00505068	0.542826
ERI2	0.00505622	0.542769
LSM5	0.00508746	0.542448
RPL22	0.0051154	0.542162
SET	0.00512243	0.54209
TRAM1	0.00513319	0.54198
ZC3H14	0.00513579	0.541954
RNA5SP393	0.00519274	0.541377
ZNF25-DT	0.0051992	0.541312
AC139792.2	0.00522155	0.541087
SMC3	0.0053203	0.540104
AL049840.2	0.0053268	0.54004
CLEC4C	0.00533003	0.540008
FAT3	0.00534314	0.539879
POLE2	0.00534856	0.539825
AP001046.1	0.00537111	0.539604
AC002519.2	0.00537628	0.539553
CNMD	0.00541744	0.539152
RN7SL169P	0.0054369	0.538962
EID1	0.00545787	0.538759
CENPN	0.00547069	0.538636
C18orf25	0.00551281	0.53823
LPAL2	0.00552439	0.538119
PPIL3	0.00552872	0.538078
NFU1	0.0055317	0.53805
FUT1	0.00556275	0.537753
LDHB	0.00557869	0.537602
FAAH	0.00558514	0.537541
RNU1-73P	0.005591	0.537485
GAS1RR	0.00559365	0.53746
AC130307.1	0.00559743	0.537424
RN7SKP62	0.00560071	0.537393
TAF9	0.00561453	0.537263
ARFGAP3	0.00561551	0.537253
AL121885.2	0.0056459	0.536967
AL445528.2	0.00564747	0.536952
AL359396.1	0.00567818	0.536664
AL591686.2	0.00569336	0.536523
KIAA1143	0.0057003	0.536458
CKAP2L	0.00571957	0.536279
EIF2AK2	0.00573788	0.536109
TMEM220-AS1	0.00574796	0.536015
SRSF3	0.00579694	0.535563
RN7SL228P	0.00581746	0.535375
BOLA2B	0.00582343	0.53532
PMF1-BGLAP	0.00582543	0.535302
NDUFAF4P1	0.00583493	0.535215
ATP5ME	0.00584847	0.535092
PRPF39	0.00585038	0.535074
AC140113.1	0.00586828	0.534911
AC018558.1	0.00588173	0.534789
RRM1	0.00590118	0.534612
RNA5SP480	0.00591861	0.534455
FAM124B	0.00593529	0.534304
TTK	0.00594952	0.534176
AC103724.4	0.00596412	0.534045
AC100812.1	0.00599069	0.533807
AC020658.6	0.00599253	0.533791
METAP2	0.0059961	0.533759
SSB	0.00600332	0.533694
NAB1	0.00603191	0.53344
SCCPDH	0.00604667	0.533309
AC010872.2	0.00604922	0.533286
Z98742.1	0.00607372	0.533069
IFI44	0.00608758	0.532947
RPL37	0.00611087	0.532742
HIST1H3F	0.00612677	0.532602
CBFB	0.00613584	0.532522
SDR39U1	0.00615309	0.532371
GDI2	0.00615347	0.532368
MRPS36	0.00622346	0.531759
H2AFZ	0.00622384	0.531756
KLHDC2	0.00623292	0.531677
AP001178.3	0.00624372	0.531584
TFAM	0.00625977	0.531445
AC093536.1	0.00627084	0.53135
YEATS4	0.00630155	0.531086
CDK2	0.00631927	0.530935
PAK1IP1	0.00636448	0.530549
GLTPP1	0.00640291	0.530224
COMMD6	0.00640456	0.53021
MIR135A2	0.00644905	0.529835
CYCSP43	0.00646345	0.529714
TUBA1B	0.00647192	0.529643
HAUS2	0.00647622	0.529607
VDAC3	0.00648232	0.529556
AC122133.1	0.00649668	0.529436
RFPL4A	0.00650629	0.529355
CYB5A	0.0065067	0.529352
AC008443.5	0.00651592	0.529275
AL954642.1	0.0065304	0.529155
CCDC7	0.00653406	0.529124
SNORD114-16	0.00654078	0.529068
COX11	0.00654685	0.529018
RPS7	0.00655033	0.528989
UBE2T	0.00656334	0.528881
AC008572.1	0.00657245	0.528806
SMIM26	0.00658953	0.528665
TTC41P	0.00659307	0.528635
STIL	0.00663596	0.528283
AC098799.2	0.0066415	0.528237
NPTX2	0.00664606	0.5282
PPP4R3C	0.00668142	0.527911
NDUFA5	0.00669269	0.527819
ZNF503-AS1	0.00673339	0.527488
SFR1	0.00674762	0.527373
RNA5SP289	0.0067731	0.527167
RN7SL724P	0.00678386	0.52708
RPS12P28	0.00682382	0.526759
RAD21	0.00683908	0.526637
RNA5SP306	0.00686624	0.52642
NUF2	0.0069457	0.525789
SRSF6	0.00694791	0.525772
SCG2	0.00697294	0.525574
ST6GAL2	0.00697499	0.525558
HIST1H3B	0.00697996	0.525519
CCP110	0.00701786	0.525222
LINC01971	0.00703082	0.52512
LRP4	0.00704731	0.524992
PCNA	0.00707261	0.524794
PRIM2	0.00708821	0.524673
MAPK8	0.00709222	0.524642
RPS8	0.00717954	0.523968
CYP51A1	0.00726315	0.523329
NLRP11	0.00726636	0.523304
AC104131.1	0.00727612	0.52323
PTRHD1	0.00729391	0.523095
MDFI	0.00732552	0.522856
SCML1	0.00739472	0.522335
ATXN10	0.0074041	0.522265
SETX	0.00742961	0.522074
RPS27	0.00743779	0.522013
FANCL	0.0074701	0.521773
RSL24D1	0.00747867	0.521709
THG1L	0.0074914	0.521614
RPL21	0.00751504	0.521439
AC012146.1	0.0075254	0.521363
KCTD6	0.00753016	0.521328
AC244502.2	0.00757639	0.520987
DNTT	0.00757661	0.520986
C15orf61	0.00758984	0.520889
CPSF6	0.00761967	0.52067
AL035251.1	0.00763784	0.520538
AL357054.4	0.00766608	0.520332
AC139085.1	0.00770117	0.520077
MAD2L1	0.00770981	0.520015
GMPS	0.00772394	0.519912
AC104167.1	0.00774996	0.519725
SRP9	0.00775905	0.519659
RPS4X	0.00776039	0.519649
AC093424.1	0.0077682	0.519593
IQCC	0.00782344	0.519197
AC109439.1	0.00787389	0.518837
OST4	0.0078784	0.518805
AC073072.2	0.00787972	0.518796
NOP58	0.00792141	0.5185
AC107308.1	0.00794155	0.518358
VRK1	0.00796537	0.51819
AL158136.1	0.00798453	0.518055
AC022415.1	0.00801053	0.517873
OLA1	0.00801463	0.517844
RPL22P19	0.00802348	0.517782
RNU6-1051P	0.00803812	0.517679
RNA5SP129	0.00806024	0.517525
SNRNP27	0.00808711	0.517338
AC112236.2	0.00810745	0.517196
EIF4G2	0.00814021	0.51697
RNU2-72P	0.00814256	0.516953
GNB4	0.00816212	0.516818
CNBP	0.00817902	0.516702
AL645939.4	0.00818897	0.516633
DUXAP8	0.00828114	0.516002
AF064858.1	0.00828211	0.515995
PPP1CC	0.00831316	0.515784
NIPSNAP2	0.00832973	0.515671
AL590483.4	0.00835017	0.515533
CENPF	0.00836562	0.515428
LGALS2	0.00837117	0.515391
NFYB	0.00839146	0.515254
FUNDC1	0.00839692	0.515217
FANCD2P2	0.0084035	0.515172
BOLA3	0.00842308	0.515041
SAMD13	0.00843094	0.514988
KPNA5	0.00847279	0.514707
ARPP19	0.00851649	0.514416
KRTAP19-10P	0.0085384	0.51427
ME3	0.00857902	0.514
TAF9B	0.00862638	0.513687
CLEC4GP1	0.00862974	0.513665
SSTR1	0.00863602	0.513624
AC010163.2	0.00865629	0.513491
AL031123.4	0.00868292	0.513316
SOX2	0.00869486	0.513238
PHKG1P4	0.00873472	0.512977
LINC01683	0.00873852	0.512952
RPSAP58	0.00874304	0.512923
TLX1	0.00876199	0.512799
ZNHIT3	0.00876589	0.512774
AC009084.3	0.008799	0.512559
AC011362.1	0.008799	0.512559
AC011467.6	0.008799	0.512559
AC025262.3	0.008799	0.512559
AC073521.1	0.008799	0.512559
AC073626.2	0.008799	0.512559
AC092070.1	0.008799	0.512559
AC245028.1	0.008799	0.512559
AL050303.3	0.008799	0.512559
AL133351.2	0.008799	0.512559
AL136317.1	0.008799	0.512559
AL137190.1	0.008799	0.512559
AL158209.1	0.008799	0.512559
AL162395.1	0.008799	0.512559
AL359198.2	0.008799	0.512559
AL590640.2	0.008799	0.512559
AP001328.1	0.008799	0.512559
BCAR1P1	0.008799	0.512559
COX5BP1	0.008799	0.512559
DPH3P1	0.008799	0.512559
HMGN2P36	0.008799	0.512559
IGKV2-19	0.008799	0.512559
LINC00317	0.008799	0.512559
LINC01820	0.008799	0.512559
MIR548AZ	0.008799	0.512559
MIR5680	0.008799	0.512559
MTND3P8	0.008799	0.512559
MTND5P40	0.008799	0.512559
PPIAP33	0.008799	0.512559
RMRPP5	0.008799	0.512559
RNA5SP34	0.008799	0.512559
RNA5SP417	0.008799	0.512559
RNU6-1224P	0.008799	0.512559
RNU6-530P	0.008799	0.512559
RNU6-663P	0.008799	0.512559
SNORD115-34	0.008799	0.512559
COL14A1	0.00880976	0.512489
AP000926.1	0.00881493	0.512456
SMN1	0.00882478	0.512392
PRPS1	0.00885523	0.512196
RMST	0.00886091	0.512159
UBE2E1	0.00888333	0.512015
AC006207.1	0.00897101	0.511453
PRELID3B	0.00899648	0.511291
POMP	0.00902136	0.511133
PCGF6	0.00903091	0.511072
RNU6-838P	0.00904119	0.511007
TRBV14	0.00904911	0.510957
FAUP2	0.00906103	0.510881
RND3	0.00908114	0.510754
AC078909.1	0.00909932	0.510639
AC104590.1	0.00910696	0.510591
AL353572.4	0.0091329	0.510428
ZNF43	0.00914369	0.51036
AC112770.1	0.00915462	0.510292
MTRR	0.00916057	0.510254
CENPH	0.00916231	0.510243
TCF7L2	0.00916949	0.510198
FSD1L	0.00918036	0.51013
FBXL7	0.00919064	0.510066
GTF2F2	0.00920203	0.509995
MIR1468	0.00921462	0.509916
CPB2	0.00922369	0.50986
HSPA4L	0.00923366	0.509798
PURPL	0.00924103	0.509752
ATP23	0.00928415	0.509484
PSMG2	0.00928998	0.509448
AL139398.1	0.00930328	0.509365
DYRK3	0.00931815	0.509273
UBA2	0.00932006	0.509262
TRBV18	0.00932824	0.509211
AP000561.1	0.00935483	0.509047
L1TD1	0.00939138	0.508822
IQGAP3	0.00939286	0.508813
PPP2R5E	0.00940624	0.508731
MIR1251	0.00942352	0.508625
CFTR	0.00943306	0.508567
AC135983.2	0.00949302	0.508201
SEPT7P4	0.00950451	0.508131
AP003119.2	0.00954576	0.507881
RPL10P6	0.00957517	0.507703
RPS20	0.0095907	0.507609
AC018450.2	0.00962168	0.507422
AC093418.1	0.00965452	0.507225
CLEC4M	0.0096729	0.507115
AC000111.2	0.00967924	0.507077
AZIN2	0.00968302	0.507054
TMEM258	0.0096837	0.50705
AC092896.1	0.00968666	0.507032
SNORA72	0.00969317	0.506993
AL662884.3	0.00970911	0.506898
AC104689.2	0.0097172	0.50685
QPRT	0.0097423	0.5067
AC012640.3	0.00976386	0.506572
TMX1	0.00977681	0.506495
SUMO1	0.0097889	0.506423
HERC2P5	0.00982723	0.506196
SLC5A4-AS1	0.00983965	0.506123
RNU11	0.00984061	0.506117
KLRF2	0.00985698	0.50602
AL158013.1	0.00986198	0.505991
TMEM237	0.00986307	0.505984
PTP4A1P2	0.00988132	0.505877
LINC01132	0.00988804	0.505837
RNA5SP366	0.00991771	0.505663
MIR210HG	0.00994494	0.505503
NDUFAF2	0.00996006	0.505415
VN1R96P	0.00997122	0.50535
AC025766.1	0.00997924	0.505303
AP001042.2	0.0100031	0.505164
OR2T1	0.0100343	0.504982
AL357873.1	0.0100518	0.504881
AC145207.3	0.0100885	0.504668
AKR1C3	0.010139	0.504376
AL603910.1	0.0101597	0.504257
ERAP2	0.0101866	0.504103
RPS6	0.010243	0.50378
GRM7-AS1	0.010246	0.503762
AC139099.1	0.0102503	0.503738
BNIP3P13	0.0102503	0.503738
MIR3665	0.0102503	0.503738
MIR424	0.0102503	0.503738
MTRNR2L7	0.0102503	0.503738
PRDX3P4	0.0102503	0.503738
RN7SKP76	0.0102503	0.503738
RNA5SP349	0.0102503	0.503738
RNU6-1195P	0.0102503	0.503738
RNU6-713P	0.0102503	0.503738
RPL23AP78	0.0102503	0.503738
LINC00283	0.0102516	0.50373
DEK	0.0102568	0.503701
AL392023.1	0.0102751	0.503596
C2orf40	0.0103444	0.503203
ZNF850	0.0103709	0.503052
AC138811.1	0.0103714	0.50305
TRBV19	0.0103991	0.502893
AC104332.1	0.0104123	0.502819
SCOC	0.010448	0.502618
GZMA	0.0104526	0.502592
RNU4-90P	0.0104814	0.502431
SNX10	0.0104941	0.502359
COX7A2	0.0105074	0.502285
AC144521.1	0.0105464	0.502067
SLITRK1	0.0105488	0.502054
CENPU	0.0105515	0.502039
SDHAF3	0.0106676	0.501394
MKX	0.0106712	0.501374
ZNF793-AS1	0.0106747	0.501355
AC123768.4	0.0106992	0.50122
POLR2K	0.0107014	0.501208
HNRNPDL	0.0107107	0.501157
SRFBP1	0.010716	0.501127
RASSF8	0.0107196	0.501108
AP005264.5	0.0107373	0.50101
ATRX	0.0107454	0.500966
CHMP5	0.0107463	0.500961
POLE4	0.0107981	0.500677
UBE2N	0.0108053	0.500638
AC006960.3	0.0108104	0.50061
KCNK9	0.0108261	0.500524
AC092718.4	0.0108337	0.500483
ATP5PBP5	0.0108346	0.500477
FUNDC2	0.0108984	0.500131
AC114977.1	0.0109272	0.499975
SLC35G2	0.0109353	0.499931
HIST1H1B	0.010951	0.499846
SMC2-AS1	0.0109529	0.499836
TMIGD1	0.0109601	0.499797
ALMS1-IT1	0.0109701	0.499743
GOLGA8S	0.0109801	0.499689
AC096589.2	0.0110312	0.499414
MELTF-AS1	0.0110427	0.499352
COX7C	0.0110612	0.499253
PXT1	0.0110938	0.499078
MTIF2	0.0110951	0.499071
HMGCS1	0.0110988	0.499051
TRUB1	0.0111031	0.499028
ELOCP19	0.0111188	0.498945
CMTM2	0.0111197	0.498939
CFAP36	0.0111219	0.498928
NDC80	0.0111695	0.498674
ZNF654	0.0111749	0.498646
ALDH9A1	0.0111856	0.498589
AL357093.2	0.0112042	0.49849
THUMPD1	0.0112043	0.498489
RN7SL510P	0.0112064	0.498478
TRDC	0.0112642	0.498172
AL589669.1	0.0112686	0.498149
GPN1	0.0112839	0.498068
MT1L	0.0113357	0.497796
TNN	0.011338	0.497784
CRADD	0.0113418	0.497764
ATP6V1G1	0.0113503	0.497719
AC008705.1	0.0113535	0.497702
AC092071.1	0.0113638	0.497648
PPP1R2C	0.0114072	0.497421
PRLR	0.0114107	0.497403
PLPPR1	0.011413	0.497391
DPY19L4	0.011431	0.497297
AL512422.1	0.0115176	0.496846
RNY1P6	0.0115429	0.496716
AC091153.3	0.0115591	0.496632
PSMA4	0.0115611	0.496621
AL392048.1	0.0115795	0.496527
AC245052.1	0.011583	0.496509
ATPAF1	0.0115868	0.496489
NARS	0.0116224	0.496305
WDR61	0.0116248	0.496293
LUC7L3	0.0116332	0.49625
LRPPRC	0.0116607	0.496109
RN7SL82P	0.0116891	0.495963
MIR98	0.0116934	0.495941
ELOVL6	0.0117003	0.495906
AC092164.1	0.0117052	0.495881
LMNB1-DT	0.0117077	0.495868
SLC17A3	0.0117101	0.495856
TLL1	0.0117516	0.495643
TOPORS	0.0117646	0.495577
ZNF728	0.0117918	0.495439
ATF2	0.011793	0.495433
WDR41	0.0118093	0.49535
ZEB1	0.0118372	0.495209
AC044802.2	0.0118515	0.495136
AL355334.2	0.0118798	0.494993
LRFN2	0.0118864	0.494959
GAS5	0.011891	0.494936
AL731533.3	0.0119522	0.494628
NDUFB1	0.0119546	0.494616
AL355835.1	0.0119806	0.494485
CCDC14	0.0119812	0.494482
AL022394.1	0.0119838	0.494469
EMC6	0.0120118	0.494329
AL117190.3	0.0120194	0.494291
SETD7	0.0120257	0.494259
POLA1	0.0121366	0.493707
MIR3122	0.0121478	0.493651
AL392023.2	0.0121524	0.493628
HSD17B11	0.0121579	0.493601
AL359233.1	0.0121916	0.493434
LRMP	0.0122506	0.493143
FZD6	0.0122731	0.493032
COIL	0.0123284	0.49276
TCEA3	0.0123373	0.492717
AC093591.3	0.0123549	0.492631
HSP90B2P	0.0123731	0.492542
IGKV2D-23	0.0123754	0.492531
TTC23	0.0123904	0.492457
MDH1	0.0124018	0.492402
TRIAP1	0.0124049	0.492387
SIX4	0.0124271	0.492278
SPRY2	0.012484	0.492002
LINC01765	0.0125052	0.491899
MIR549A	0.0125185	0.491835
RPSA	0.0125756	0.491559
LINC01819	0.012601	0.491437
TCTEX1D1	0.0126123	0.491382
RN7SL555P	0.0126221	0.491335
SNX6	0.012639	0.491254
ARHGAP5	0.012648	0.49121
TOMM20	0.0126543	0.49118
HIST1H2BD	0.0126767	0.491073
LINC01629	0.0126978	0.490972
HENMT1	0.0126985	0.490969
OR51B2	0.0127137	0.490896
NDUFS4	0.0127372	0.490784
PARK7	0.0127466	0.490739
HEATR6	0.0127551	0.490698
IER3IP1	0.0127588	0.490681
AC126564.1	0.0128022	0.490474
SMS	0.0128023	0.490474
ST5	0.0128313	0.490336
AC110588.1	0.0128913	0.490052
MEX3C	0.0129237	0.4899
LINC02465	0.0129585	0.489736
SERF1A	0.0129863	0.489605
BCLAF1	0.0130439	0.489335
KCNMB3	0.0130624	0.489248
TRIM45	0.0131258	0.488953
MMADHC	0.0131351	0.488909
AL161757.3	0.0131384	0.488894
MIR609	0.01314	0.488887
AC108865.1	0.0131544	0.48882
PITX1	0.0132106	0.488559
CCDC58	0.0132193	0.488519
ATP6V0CP2	0.0132211	0.488511
NKRF	0.0132365	0.488439
CLEC12A	0.0132615	0.488324
CMC2	0.0132895	0.488195
PDCD5	0.0132944	0.488172
COPS8	0.0133026	0.488134
LINC01514	0.0133084	0.488108
SEMA3A	0.0133147	0.488079
NDUFA1	0.0133192	0.488058
RO60	0.0133236	0.488038
ACTR6	0.0133317	0.488001
SACM1L	0.0133324	0.487997
SP3	0.0134162	0.487613
MT1M	0.0134606	0.487411
TRBV16	0.0134712	0.487362
AC000065.2	0.0134837	0.487305
PSPHP1	0.0134854	0.487298
SLC25A26	0.0135169	0.487154
POT1	0.0135345	0.487074
FUBP1	0.0135551	0.486981
FAM199X	0.0135582	0.486967
AC104137.1	0.0135754	0.486889
AL354751.2	0.0135785	0.486875
AC025754.1	0.0136246	0.486667
AC073062.1	0.0136351	0.48662
AC138907.9	0.0136351	0.48662
JHY	0.013665	0.486485
AC093459.1	0.0136791	0.486421
RNU4-29P	0.0136938	0.486355
TPR	0.0136971	0.48634
LIN7C	0.0137506	0.4861
SGO2	0.0137588	0.486064
AP001107.5	0.0137625	0.486047
SNORD115-17	0.0137738	0.485996
LINC00280	0.0138524	0.485646
MIR4503	0.0139213	0.48534
RPL10	0.0139475	0.485224
CRTC3-AS1	0.0139587	0.485174
TRDN	0.0140458	0.48479
SSX2IP	0.0140512	0.484766
GBE1	0.0140548	0.48475
AC245128.1	0.014055	0.484749
PAQR3	0.01408	0.484639
SKA3	0.0141096	0.48451
CCNT1	0.0141391	0.48438
APOC1	0.0141943	0.484139
BMF-AS1	0.0142196	0.484028
PARP2	0.0142217	0.484019
RAD18	0.0142384	0.483947
MT2A	0.0142451	0.483917
AC126121.3	0.0142728	0.483797
AC008464.1	0.0142961	0.483696
C5orf24	0.0143099	0.483636
RNU11-3P	0.0143815	0.483327
LINC00383	0.0144063	0.483219
EPHA5	0.0144797	0.482904
AC005224.1	0.0144976	0.482827
IKZF2	0.0145596	0.482561
MED28P2	0.014593	0.482419
TNRC18P3	0.0146103	0.482345
POGLUT3	0.0146407	0.482216
LNCTAM34A	0.0146518	0.482168
SMKR1	0.0146706	0.482088
AL033380.1	0.0146922	0.481997
LINC02458	0.014757	0.481723
RPL9	0.0147953	0.481561
CCNE2	0.0148277	0.481425
NEGR1	0.0148709	0.481243
AC009712.1	0.0148862	0.481179
CNKSR3	0.0149407	0.48095
AP000525.1	0.0149565	0.480884
LINC02249	0.0149721	0.480819
GPX7	0.0150018	0.480695
EPOP	0.0150494	0.480497
AC079848.1	0.0150725	0.480401
AL391069.2	0.0150761	0.480386
PNN	0.0151074	0.480256
NPHP3-AS1	0.0151166	0.480218
CAND1	0.0152508	0.479664
TRBV7-4	0.0152715	0.479579
HAGLROS	0.0152901	0.479502
AC123768.1	0.0153358	0.479315
RNLS	0.0153883	0.4791
RTRAF	0.0154519	0.478841
AC009901.2	0.015466	0.478784
RN7SL41P	0.015466	0.478784
TMEM135	0.0155288	0.478529
OR4C46	0.0155491	0.478446
NEBL-AS1	0.015577	0.478334
EPRS	0.0156197	0.478161
TYMSOS	0.0156296	0.478121
PCDH9	0.0156345	0.478102
ZGRF1	0.0156862	0.477893
RBFOX2	0.0157207	0.477755
SMC2	0.0157273	0.477728
MAPK6	0.0157331	0.477705
AC009623.2	0.0157356	0.477695
AC079597.1	0.0157356	0.477695
AL157387.1	0.0157356	0.477695
MIR208A	0.0157356	0.477695
MIR887	0.0157356	0.477695
RNU6-991P	0.0157356	0.477695
CCT6A	0.0158744	0.477141
DHFR	0.0159265	0.476933
FOXN4	0.0159602	0.4768
AC008592.1	0.0159852	0.476701
HADHB	0.0160177	0.476572
IFT81	0.0160854	0.476305
RNA5SP342	0.0161345	0.476112
COMMD7	0.0161407	0.476088
AL109983.1	0.016321	0.475383
AC004816.2	0.0163616	0.475225
LINC02466	0.0163901	0.475115
POLE3	0.0163963	0.47509
AL353807.5	0.0164473	0.474893
MNS1	0.0164526	0.474873
MIR1279	0.0164657	0.474822
PELI2	0.0164803	0.474766
TCEAL8	0.0164995	0.474692
RPL7AP28	0.0164996	0.474691
MIR548T	0.0165023	0.474681
ESD	0.0165063	0.474665
AC090109.1	0.016514	0.474635
PBK	0.016516	0.474628
NCAPG	0.0165336	0.47456
LRR1	0.0165503	0.474496
AEBP2	0.0166149	0.474248
AC073641.1	0.0167288	0.473812
RF02126	0.0167288	0.473812
RPS27P27	0.0167288	0.473812
STARD3NL	0.0167393	0.473772
HSD17B8	0.0167499	0.473732
TPM2	0.0167533	0.473719
GOLGA8EP	0.0168552	0.473332
DPY30	0.0168665	0.473289
TRMT11	0.016883	0.473226
SNHG16	0.0168987	0.473167
ODR4	0.0169206	0.473084
RPS27L	0.016928	0.473056
STAG3L1	0.0169495	0.472975
MED31	0.0169668	0.47291
TRBV7-9	0.0170009	0.472781
RANBP6	0.0170058	0.472763
MZT1	0.0170146	0.47273
CLGN	0.0170194	0.472712
BORCS7	0.0170277	0.472681
MRPS33	0.0170372	0.472645
VMA21	0.0171091	0.472375
AC097518.2	0.0171302	0.472297
RN7SKP114	0.0171445	0.472243
MAF	0.0171557	0.472201
FGFR1OP2	0.0171629	0.472174
ANLN	0.0171906	0.472071
TRPS1	0.0172126	0.471989
AC130324.3	0.0172231	0.47195
ATP5IF1	0.0172418	0.47188
AP001042.1	0.0172912	0.471696
EEF1E1	0.0172926	0.471692
RN7SL697P	0.0173146	0.47161
BRCA2	0.0173898	0.471332
AC025370.1	0.0173971	0.471304
ZFP57	0.0173995	0.471295
TXNDC9	0.0174101	0.471257
STYX	0.0174128	0.471246
RWDD4	0.0175059	0.470904
DNAJA1	0.0175107	0.470886
AC016405.2	0.0175132	0.470877
SNX4	0.0175408	0.470775
OR7E35P	0.0175636	0.470692
PPIAP22	0.0175936	0.470582
AL157769.1	0.0175984	0.470565
HIST1H2AL	0.017659	0.470343
GFOD1-AS1	0.0176598	0.47034
NXN	0.0176691	0.470306
RF00086	0.0177126	0.470148
AL513128.2	0.0177645	0.469959
RBBP7	0.0177883	0.469873
COL6A5	0.0178181	0.469765
SLC29A4P2	0.0178569	0.469624
VTRNA1-1	0.0178882	0.469512
UBE2Q2L	0.0179168	0.469408
MIR579	0.0179308	0.469358
TVP23B	0.017998	0.469116
CUL5	0.0180648	0.468876
AC114947.2	0.0181483	0.468578
LINC01825	0.0181945	0.468413
FEM1AP4	0.0182166	0.468335
ADH5	0.0182435	0.468239
AC016394.1	0.0182618	0.468174
AL670729.1	0.0183014	0.468034
RIPPLY3	0.0183917	0.467714
PKIG	0.0184147	0.467633
AC008581.1	0.0184318	0.467573
RHEB	0.018439	0.467548
RPS6P4	0.0186433	0.466831
MRPL47	0.0186613	0.466769
KIFAP3	0.0186916	0.466663
TIPRL	0.0187754	0.466372
LZIC	0.0188009	0.466283
CEBPZ	0.018861	0.466075
GNPTAB	0.018873	0.466034
AC018557.1	0.0189981	0.465602
BNIP3P39	0.0190765	0.465334
OXT	0.0190829	0.465312
NKAPD1	0.0190915	0.465282
RPS28	0.0191439	0.465103
SPATA31D1	0.0191606	0.465046
ABCE1	0.019406	0.464213
AC004063.1	0.0194138	0.464186
SEPT7	0.0194593	0.464033
AL133268.2	0.019473	0.463987
PFDN4	0.0195051	0.463879
EPHA5-AS1	0.0195303	0.463794
OTUD6B	0.0195323	0.463787
DHX15	0.0195999	0.46356
VAMP7	0.0196314	0.463455
CLRN3	0.0196417	0.46342
FMR1NB	0.0196495	0.463394
AL354707.1	0.0196889	0.463263
ERBIN	0.0197381	0.463099
ISM1-AS1	0.0197692	0.462995
RNF138	0.0198071	0.462869
AL138962.1	0.0198805	0.462626
AL117339.1	0.0199054	0.462543
PPIP5K2	0.0199477	0.462403
AC027312.1	0.0200092	0.4622
AL589743.6	0.0200351	0.462115
PPIAP55	0.0201122	0.461862
SNORA73B	0.0201923	0.461599
GGCT	0.0201925	0.461599
AL391834.1	0.0201948	0.461591
PTTG1	0.0202058	0.461555
SHC3	0.0202095	0.461543
MYCBP	0.0202251	0.461492
SNRPD2	0.0202494	0.461413
MORF4L1	0.0203058	0.461229
ILF2	0.0203066	0.461226
AC096711.2	0.0203176	0.461191
SDE2	0.0203204	0.461181
AC092332.1	0.0203403	0.461117
ZCRB1	0.0204126	0.460882
OR51A10P	0.0204638	0.460716
SPTY2D1OS	0.0205453	0.460453
MYZAP	0.0205659	0.460387
HOXA4	0.0206388	0.460152
RPL4	0.0206397	0.460149
SLC9C2	0.0206711	0.460048
TOPBP1	0.0206797	0.460021
PTENP1-AS	0.0207017	0.45995
CSTF2T	0.0207631	0.459754
BDH2	0.0207741	0.459719
LRGUK	0.0207777	0.459707
BCAT1	0.0208005	0.459634
FAM149B1P1	0.0208373	0.459517
AC118758.3	0.020926	0.459234
MRPL11	0.0209485	0.459163
CLYBL	0.0209691	0.459098
CASP4	0.0209783	0.459069
LINC01159	0.0210144	0.458954
RPL13P12	0.021043	0.458864
RPL23	0.0210434	0.458862
C8orf89	0.0210852	0.45873
LINC01908	0.0210941	0.458702
RN7SL52P	0.0210941	0.458702
RN7SL700P	0.0210941	0.458702
AL353621.2	0.0210941	0.458702
SMIM2-AS1	0.0211396	0.458559
CCT4P1	0.0211462	0.458538
TMEM106C	0.0212517	0.458206
RNA5SP53	0.0213141	0.458011
DDX3P3	0.0213631	0.457858
RNU6-509P	0.0214467	0.457597
HIST1H3I	0.02151	0.4574
OR5AP2	0.0215877	0.457159
H2AFV	0.021596	0.457133
KIF15	0.0216262	0.45704
PIH1D2	0.0216454	0.45698
PON1	0.0216459	0.456979
AC006144.1	0.0217675	0.456604
RPS27P20	0.0217675	0.456604
AC025884.1	0.0218237	0.456431
LINC01952	0.0218455	0.456364
CCDC102B	0.0218943	0.456215
RARRES2	0.0218988	0.456201
SRP14	0.0219042	0.456184
PCM1	0.0219789	0.455956
FIGNL1	0.0220078	0.455868
APLN	0.0220153	0.455845
HOXD13	0.0220489	0.455742
ENPEP	0.0220917	0.455612
AC022400.8	0.0221163	0.455538
COX7B	0.0221771	0.455353
RPLP0	0.0221815	0.45534
ATP5F1C	0.0222097	0.455254
RFESDP1	0.0222932	0.455002
AC114488.2	0.022393	0.454701
AC010368.1	0.0224553	0.454514
SCAMP1	0.0224728	0.454462
ZNF32	0.0224954	0.454394
DDX50P2	0.0225024	0.454373
CHD1	0.022623	0.454012
VPS13A	0.0226529	0.453923
SF3B5	0.0228653	0.453293
NDFIP2	0.0228788	0.453253
INTS13	0.0229179	0.453138
AC013701.2	0.0229647	0.453
AC019176.2	0.0229653	0.452998
RNU6-1311P	0.0229653	0.452998
RPS4XP19	0.0229653	0.452998
LSM3	0.0229744	0.452971
PDZRN3	0.023015	0.452852
AL513479.1	0.0230454	0.452762
PRKRA	0.0230531	0.45274
GCFC2	0.0231008	0.4526
HIST1H3G	0.0231021	0.452596
SNHG29	0.0231071	0.452581
BEND5	0.0231244	0.452531
AL122023.1	0.023216	0.452263
PBDC1	0.0232237	0.45224
GTF2A2	0.0232287	0.452226
PPM1D	0.023268	0.452111
METTL9	0.0233074	0.451996
RNU6-433P	0.0233962	0.451738
PLK2	0.023436	0.451623
ZNF627	0.0234437	0.4516
AC004086.1	0.0234809	0.451493
SLF1	0.0235216	0.451375
IGHV1OR16-1	0.0236084	0.451124
SNORD121B	0.023625	0.451076
AC018639.1	0.0236468	0.451014
CEP295	0.0237383	0.450751
MT-ND3	0.023752	0.450712
RNU6-168P	0.0237694	0.450662
PLK4	0.02379	0.450603
LGALS8	0.0237953	0.450588
HLA-DRB5	0.0238882	0.450322
STK3	0.0238935	0.450307
AL445423.1	0.0238985	0.450293
AC023590.1	0.0239213	0.450228
RN7SKP249	0.0239285	0.450207
OSTC	0.0239314	0.450199
MPC2	0.0240017	0.449999
SLC25A36	0.0240097	0.449976
IFT88	0.0240401	0.44989
AC006924.1	0.0240857	0.44976
MTHFD2P7	0.0241469	0.449587
HMGA2	0.0242195	0.449382
NDST3	0.0243475	0.449022
BRIP1	0.0243744	0.448946
CERS3-AS1	0.0243754	0.448943
ZMYND11	0.0244055	0.448859
FRG2FP	0.0244174	0.448825
MIR508	0.0244174	0.448825
KAZALD1	0.0244175	0.448825
IFT22	0.0244303	0.448789
RNU7-87P	0.0244382	0.448767
MMD	0.0244385	0.448766
TRBV6-5	0.0245097	0.448567
AL353150.1	0.0246076	0.448294
SMIM24	0.0246218	0.448254
MED30	0.0246674	0.448127
UFC1	0.0246856	0.448077
BCCIP	0.0246887	0.448068
TEX101	0.0247108	0.448007
RAI14	0.0247152	0.447995
RNA5SP368	0.0247189	0.447984
AC012558.1	0.0247521	0.447892
AC007114.1	0.0247793	0.447817
AL035045.1	0.0248418	0.447644
CCDC150	0.0248449	0.447635
RIOK1	0.0248666	0.447575
RAB38	0.0248993	0.447485
AC128685.1	0.0249591	0.44732
FBXO5	0.0250219	0.447147
NIFKP3	0.0250234	0.447143
ACTG1P19	0.0250368	0.447106
DDX5	0.0250465	0.44708
MORN2	0.0250723	0.447009
CAPRIN1	0.0251533	0.446787
HSDL2	0.0252084	0.446636
WWTR1-AS1	0.0252177	0.446611
TRBV12-2	0.0252422	0.446544
RNA5SP511	0.025316	0.446343
LINC01218	0.025439	0.446008
CNOT10	0.025449	0.445981
GOLGA8G	0.0254628	0.445944
AC023469.1	0.0255181	0.445794
ACOX2	0.0255365	0.445744
AGGF1	0.0255367	0.445744
LINC00960	0.0255382	0.44574
PNRC2	0.0255597	0.445682
AC026725.1	0.0255706	0.445652
AC253536.6	0.0255932	0.445591
TIMM23	0.0256398	0.445465
ZNF121	0.0256451	0.445451
AC023886.1	0.0256907	0.445328
AC023078.3	0.0257174	0.445257
CD96	0.0257423	0.44519
RPL27	0.0257537	0.445159
CREB5	0.0257858	0.445073
SLAIN2	0.0257967	0.445044
TYW3	0.0258021	0.445029
RNA5SP215	0.0258966	0.444776
MPP7-DT	0.0258976	0.444774
AC009831.1	0.0259349	0.444674
KIF18A	0.0259677	0.444586
PPP1R8	0.0260489	0.44437
AL592293.1	0.0261194	0.444183
AC099535.2	0.0261452	0.444114
SNHG4	0.0261779	0.444028
SNORA74A	0.0261822	0.444016
COPS2	0.0261896	0.443996
TCEA1	0.0262243	0.443905
AC012557.2	0.0262597	0.443811
NGLY1	0.026322	0.443646
HSPA13	0.026356	0.443557
TMEM263	0.0264565	0.443292
HOXA9	0.0264928	0.443197
MATR3	0.0265035	0.443169
KNTC1	0.0265073	0.443159
DHX9	0.0265278	0.443105
AC145625.2	0.0265442	0.443062
ZNF257	0.0266007	0.442914
ARGLU1	0.0266009	0.442914
PGAM1P3	0.0266014	0.442912
SNORD19	0.026628	0.442842
SLC38A2	0.0266638	0.442749
TET1	0.0268042	0.442383
AAMDC	0.026811	0.442365
GADD45A	0.0269602	0.441979
BRK1	0.0270077	0.441856
AL136317.2	0.0270126	0.441843
HNRNPR	0.0270588	0.441724
RBM43	0.0270621	0.441715
LINC01854	0.0271205	0.441565
VHL	0.0271935	0.441377
NAP1L1	0.0272163	0.441318
H3F3A	0.027269	0.441183
KIF20B	0.027355	0.440963
VTA1	0.0273697	0.440925
AL080276.2	0.027414	0.440812
NLRP7	0.0274293	0.440773
DIAPH3	0.0274403	0.440745
AC005609.4	0.0274508	0.440718
AC011396.3	0.0274508	0.440718
AC021660.1	0.0274508	0.440718
AC053481.1	0.0274508	0.440718
AC073968.2	0.0274508	0.440718
AC114812.4	0.0274508	0.440718
AC239859.3	0.0274508	0.440718
AL138960.2	0.0274508	0.440718
AL139327.1	0.0274508	0.440718
AL162464.2	0.0274508	0.440718
C1GALT1P3	0.0274508	0.440718
CR383656.12	0.0274508	0.440718
IGKV3D-31	0.0274508	0.440718
IGLV3-26	0.0274508	0.440718
IQCA1-AS1	0.0274508	0.440718
LINC02497	0.0274508	0.440718
RN7SKP172	0.0274508	0.440718
RNA5SP76	0.0274508	0.440718
RPSAP55	0.0274508	0.440718
CPNE8	0.0274583	0.440699
MIR4258	0.0274583	0.440699
FAM102B	0.0274874	0.440625
CEP192	0.0274944	0.440607
ZMYM6	0.0275309	0.440514
PLGRKT	0.0276271	0.440269
AC003043.1	0.0276461	0.440221
AC064862.6	0.0276604	0.440185
AP000254.1	0.0277327	0.440002
AP000345.2	0.0277481	0.439963
ZDHHC15	0.0277624	0.439927
KIAA1586	0.0277698	0.439908
BLOC1S2P1	0.0278013	0.439828
RN7SL571P	0.0278309	0.439754
DCHS2	0.0278413	0.439727
ATAD5	0.0278785	0.439634
AL355337.1	0.0279119	0.439549
LTV1	0.0279359	0.439489
SEC31B	0.0280234	0.439269
MELK	0.0280438	0.439218
DNAJC8	0.028049	0.439205
RARS	0.0281071	0.43906
PAXBP1	0.0281957	0.438838
SCARNA12	0.0282206	0.438776
AZGP1P1	0.0282711	0.43865
XPOT	0.0282958	0.438589
RGPD8	0.0284259	0.438265
CDC26	0.0285882	0.437864
USP37	0.0286187	0.437788
RNU6-255P	0.028655	0.437699
BACE1	0.0286765	0.437646
AL591034.1	0.0287554	0.437452
FAM13B	0.0288248	0.437281
ZNF92	0.0288714	0.437167
RPL30P15	0.0288774	0.437152
YBX1P7	0.0288774	0.437152
TNFSF4	0.0288845	0.437135
CUL4B	0.0289034	0.437089
NDC1	0.0289191	0.43705
DSN1	0.0289194	0.437049
TMED7	0.0289309	0.437021
IFT74	0.0289616	0.436946
MTCO1P7	0.02897	0.436926
AC026124.1	0.0289982	0.436857
SUCLG1	0.0290166	0.436812
RPS4XP20	0.0290645	0.436695
COMMD8	0.0291429	0.436504
NUP43	0.029166	0.436448
IFI44L	0.0291685	0.436442
RNF125	0.0291899	0.43639
HIST1H4E	0.0291927	0.436384
AC137834.1	0.0292685	0.4362
EXOC6	0.0293163	0.436084
AZI2	0.0293605	0.435977
AL590428.1	0.0293856	0.435916
BLZF1	0.0294414	0.435782
MRPL48	0.0295833	0.43544
AC244517.11	0.0296148	0.435364
PRNP	0.0296161	0.435361
SEC61B	0.0296225	0.435346
RPL23AP96	0.0297332	0.435081
AL356489.2	0.0297952	0.434933
TBL1XR1	0.0297969	0.434928
PSMB7	0.0298688	0.434757
AC046129.1	0.0298695	0.434755
AC026271.1	0.0299344	0.434601
INTS4P1	0.0299649	0.434528
AC072062.1	0.0300057	0.434431
COPS3	0.0300195	0.434398
CDYL2	0.0300588	0.434305
NOP10	0.0301589	0.434068
HSPD1P16	0.0302215	0.43392
GLOD4	0.030237	0.433883
GTF2B	0.0302913	0.433755
CWC27	0.0303371	0.433648
AL356776.2	0.030345	0.433629
MPV17L	0.0303698	0.433571
AL590068.1	0.0304661	0.433344
EIF4EBP2P1	0.0304661	0.433344
UXT	0.030523	0.433211
AC010904.2	0.0306055	0.433018
TEX12	0.0306406	0.432936
HTR1A	0.0306609	0.432889
AC090001.2	0.0306956	0.432807
SNORD73B	0.0306995	0.432798
GBP5	0.0307758	0.432621
WDR76	0.0308055	0.432552
MRPS31P4	0.0308899	0.432356
CAPN6	0.0309097	0.43231
AC125257.2	0.0309106	0.432307
AC073529.1	0.0309523	0.432211
NDUFA9P1	0.030953	0.432209
GOLGA8N	0.0310121	0.432072
YBEY	0.031054	0.431975
RNF112	0.0310994	0.431871
DPM1	0.0311259	0.43181
VPS29	0.0311324	0.431794
SEPT7P5	0.0312095	0.431617
AC245014.1	0.0312545	0.431513
AMD1	0.0313162	0.431372
AP003559.1	0.0313341	0.431331
AP002852.1	0.0313562	0.43128
PAIP1	0.0313758	0.431235
CDKN3	0.0314016	0.431176
ARHGEF39	0.0314357	0.431098
COX6C	0.0314518	0.431061
CLSPN	0.0314879	0.430979
ARMCX3	0.0314995	0.430952
AL390955.2	0.031514	0.430919
BTBD3	0.031516	0.430914
ATP5MC3	0.0315217	0.430901
RF00284	0.0315225	0.430899
RPL23AP49	0.0315533	0.430829
HOXA1	0.0315667	0.430798
SMIM27	0.0315942	0.430736
MALSU1	0.0317296	0.430428
CHEK1	0.0317669	0.430343
AL035443.1	0.0318191	0.430225
AL357558.3	0.0318346	0.43019
RNA5SP360	0.0318478	0.43016
RPL34P21	0.0318478	0.43016
SSX7	0.0318478	0.43016
AL157902.1	0.0319907	0.429837
GMFG	0.0320091	0.429795
IMPDH2	0.0320425	0.42972
OR2M1P	0.0321493	0.429479
CIAO2A	0.03215	0.429478
ING3	0.032172	0.429429
C4orf46	0.0322267	0.429306
AC099509.1	0.0322343	0.429289
AL162872.1	0.0322343	0.429289
PLCB4	0.0322363	0.429284
YWHAQ	0.0322381	0.42928
CAMTA1	0.0322644	0.429221
NUP107	0.032336	0.429061
NUDT2	0.0323417	0.429048
ENTPD1-AS1	0.0323576	0.429013
ACYP1	0.0323622	0.429002
CLNS1A	0.0323737	0.428977
AC006213.4	0.0324008	0.428916
NMD3	0.032404	0.428909
AL031736.1	0.0324807	0.428738
DYNC2LI1	0.0325235	0.428642
NDUFA2	0.0325573	0.428567
KIZ	0.0326573	0.428345
AGGF1P3	0.0326823	0.42829
AC129492.6	0.0327277	0.428189
BLM	0.0327345	0.428174
AC022325.1	0.0327387	0.428164
C19orf81	0.0327657	0.428105
BX284668.5	0.0327674	0.428101
AL031432.2	0.0327751	0.428084
C1D	0.0327858	0.42806
RNF2P1	0.0328011	0.428026
UGT1A3	0.0328449	0.42793
GCSHP2	0.032871	0.427872
GCOM1	0.032897	0.427814
ACAT2	0.0328998	0.427808
ASPA	0.03292	0.427764
RWDD4P2	0.0329485	0.427701
PYGO1	0.0330868	0.427397
DDX20	0.0330938	0.427381
SCARNA8	0.0331071	0.427352
SMC6	0.0331424	0.427275
RNA5SP267	0.0331953	0.427159
MGST2	0.033221	0.427102
DDX3Y	0.0332348	0.427072
C11orf58	0.0332732	0.426988
FGF7P8	0.0332782	0.426977
MTX2	0.0333342	0.426855
TOMM70	0.0333473	0.426826
GAPDHP26	0.033354	0.426812
ZNF639	0.0333619	0.426794
GKAP1	0.0334497	0.426603
TCF4-AS2	0.033498	0.426498
SASS6	0.0335251	0.426439
MSI2	0.0335566	0.426371
GPR89P	0.0335637	0.426355
RFPL4AP6	0.0336292	0.426213
SATB1	0.0336394	0.426191
CENPI	0.033686	0.42609
TDGF1P7	0.0337057	0.426047
IGLV2-34	0.0337072	0.426044
RFWD3	0.0338001	0.425843
CNOT7	0.033868	0.425697
AL162713.1	0.0338962	0.425636
COX20P1	0.0339009	0.425626
SRSF5	0.0339018	0.425624
HTR5A	0.0339121	0.425602
AL022100.1	0.0339662	0.425485
AC022424.2	0.0340173	0.425375
MIER1	0.0340427	0.425321
AC010451.1	0.0340508	0.425303
OXSR1	0.0340879	0.425224
AL133268.3	0.0340995	0.425199
ANKRD20A3	0.0341189	0.425157
LINC01675	0.0341254	0.425144
AC123912.1	0.0341768	0.425033
NAP1L5	0.0342386	0.424901
AC117394.1	0.0342514	0.424874
HIST1H2BC	0.0342661	0.424842
AC015712.1	0.034349	0.424666
U91328.1	0.0343731	0.424614
PIK3CA	0.0344038	0.424549
SNORD114-7	0.0344552	0.424439
UTP11	0.0344597	0.42443
VPREB1	0.034499	0.424346
URI1	0.0345519	0.424234
AC116351.2	0.0345787	0.424177
AP3S1	0.0346688	0.423986
NME7	0.0347015	0.423917
RPS15AP30	0.0347299	0.423857
AC073321.1	0.034765	0.423783
RMND5A	0.0347865	0.423738
ZMYM4	0.0348288	0.423648
MIR4659B	0.0349243	0.423447
PSMD7	0.0349618	0.423368
MIR634	0.0349658	0.42336
AC079355.1	0.0349701	0.423351
RN7SKP51	0.0349701	0.423351
CMC1	0.0350415	0.423201
PPIA	0.0350482	0.423187
SEC61G	0.0351456	0.422983
GOLGA8T	0.035146	0.422982
RNU6-82P	0.0351641	0.422944
LINC02368	0.0351649	0.422942
RNA5SP56	0.0351649	0.422942
ZNF85	0.0352422	0.422781
CEP76	0.0353123	0.422634
MIR181A1	0.0353571	0.422541
RDX	0.0353898	0.422473
HOTAIRM1	0.0354097	0.422432
AC008147.1	0.0355319	0.422178
CLUHP4	0.0355319	0.422178
RAB33B	0.0355396	0.422162
GORAB-AS1	0.0355612	0.422117
ZFP91	0.0356018	0.422033
AHI1	0.0356235	0.421988
AL031601.2	0.0356797	0.421871
CCBE1	0.0356876	0.421855
PLA2G7	0.0358206	0.42158
AC005013.1	0.0358349	0.421551
ZNF684	0.0358999	0.421417
IMPACT	0.0359152	0.421386
AC005837.1	0.0359243	0.421367
ATP5PD	0.036004	0.421203
FARSB	0.0360122	0.421186
AC010997.4	0.0360171	0.421176
TMEM126A	0.036067	0.421074
LINC02026	0.0361233	0.420958
LIMA1	0.0361537	0.420896
OXR1	0.0361952	0.420811
MIR4799	0.0362169	0.420767
LINC01428	0.03622	0.42076
LINC00661	0.0362641	0.42067
THOC2	0.0363265	0.420543
CBWD6	0.0364158	0.420361
ZHX1	0.0364199	0.420353
RN7SL673P	0.0364492	0.420293
AC068389.2	0.0364676	0.420256
LINC00112	0.0364676	0.420256
LINC02591	0.036526	0.420137
ZW10	0.0366321	0.419922
MIR1303	0.0366537	0.419878
ATP5F1E	0.0367344	0.419715
KATNA1	0.0367943	0.419594
AC024132.3	0.0368208	0.419541
ZNF503-AS2	0.0368891	0.419403
TRBV17	0.0369709	0.419238
ELOC	0.0370468	0.419086
MPC1	0.0371358	0.418907
Z82190.1	0.0371603	0.418858
RNU7-141P	0.0371648	0.418849
HOXA-AS3	0.0371901	0.418799
NDUFA12	0.0372908	0.418597
OR2L8	0.0372965	0.418586
NIPSNAP3B	0.0373104	0.418558
ANKRD19P	0.0374151	0.418349
TOP2A	0.0374259	0.418328
AC146944.3	0.0374517	0.418276
NDUFA4	0.0377295	0.417725
AC114956.1	0.0377452	0.417694
RGS13	0.0377511	0.417683
ANKRD36C	0.0377735	0.417638
KNL1	0.037788	0.41761
HSPA14	0.0377901	0.417605
HECW2	0.0377968	0.417592
PRMT9	0.0378171	0.417552
[truncated: 51,994 more rows]

## Sheet: LINC01222
.id	p.value	R
LINC01222	4.59478e-178	1
AC105383.1	1.28912e-14	0.96318
AC007100.1	9.38405e-14	0.956111
AC007179.2	2.02032e-13	0.953022
AC007253.1	3.64609e-12	0.939225
SLC8A1-AS1	1.99834e-11	0.929231
ANTXRLP1	6.05557e-11	0.921817
RN7SL448P	6.95953e-11	0.920832
AL589787.2	2.52733e-10	0.911059
RPL9P16	3.84579e-10	0.907613
AC022929.2	6.35144e-10	0.903311
SCN11A	7.50006e-10	0.90184
AC022432.1	8.2521e-10	0.900984
AC078785.1	1.04023e-09	0.898876
AC241952.1	1.05072e-09	0.898784
AF106564.1	1.39085e-09	0.896166
LINC01205	1.41588e-09	0.895997
AC008105.1	2.09002e-09	0.892237
HMGB1P41	2.18355e-09	0.891805
AC105219.3	2.21717e-09	0.891654
AL358473.1	2.97751e-09	0.888695
GATA3-AS1	3.25607e-09	0.887781
AC018641.1	4.00289e-09	0.88564
AC110751.1	4.3616e-09	0.884737
AP001122.1	4.57594e-09	0.884229
AC097484.2	4.61937e-09	0.884129
LINC00564	6.0196e-09	0.881281
A1BG	6.26478e-09	0.880845
Z82206.1	6.38941e-09	0.88063
AC008443.2	6.46437e-09	0.880502
TMIE	6.5795e-09	0.880308
AC090616.2	8.14625e-09	0.877936
SOAT2	9.83272e-09	0.875805
AL451054.4	1.06333e-08	0.874907
MIR4713HG	1.17767e-08	0.873725
ADAM20P1	1.22006e-08	0.873313
HSPA8P18	1.27326e-08	0.872813
Z82243.1	1.31204e-08	0.872461
UBE2R2-AS1	1.36324e-08	0.87201
KF456478.1	1.4257e-08	0.87148
LINC00896	1.52287e-08	0.870696
RASAL1	1.56424e-08	0.870376
ZDHHC11	1.58561e-08	0.870214
TUB	1.76815e-08	0.868902
DPP6	1.91665e-08	0.867921
AC074281.1	2.14223e-08	0.866556
CAPN8	2.32743e-08	0.865529
AC092471.1	2.40913e-08	0.865099
LCN10	2.43826e-08	0.864949
MIR4714	2.47841e-08	0.864745
AC245884.1	2.54049e-08	0.864435
AP001999.4	2.54108e-08	0.864432
C1QTNF9B	2.54858e-08	0.864395
AC005306.1	2.5586e-08	0.864346
SEPT12	2.58233e-08	0.86423
LHFPL1	2.68348e-08	0.863746
BX284668.3	2.72511e-08	0.863552
DIRC3	2.90657e-08	0.862735
AP000894.2	2.92367e-08	0.86266
HNRNPA1P2	2.94815e-08	0.862554
IL11	2.99941e-08	0.862334
AC008667.1	3.00142e-08	0.862326
RPL5P9	3.19017e-08	0.861545
LINC02636	3.19538e-08	0.861524
AL121988.1	3.29916e-08	0.861113
IQSEC3	3.31159e-08	0.861065
AL136382.1	3.34263e-08	0.860945
FRMD8P1	3.42907e-08	0.860615
AL646090.1	3.56102e-08	0.860126
RN7SL36P	3.71547e-08	0.859574
AL356753.1	3.81882e-08	0.859216
BX322557.2	3.86747e-08	0.859051
AL590807.1	3.95716e-08	0.858751
ADAM20	4.4259e-08	0.857275
MIR6780B	4.61226e-08	0.856727
ALG1L11P	4.66117e-08	0.856586
MIR3137	4.67458e-08	0.856548
LINC00929	4.79019e-08	0.856222
PPIAP14	4.82393e-08	0.856128
C10orf90	4.94348e-08	0.8558
PACSIN1	5.07648e-08	0.855444
HOXB-AS1	5.38016e-08	0.854661
NAMA	5.7715e-08	0.853708
MYCBPAP	5.77275e-08	0.853705
AP000911.1	5.89359e-08	0.853423
AC092821.3	6.27732e-08	0.85256
MTCYBP28	6.36228e-08	0.852375
DLGAP4-AS1	6.61683e-08	0.851835
CCDC33	7.27569e-08	0.850519
SYT16	7.38629e-08	0.850308
FSIP1	7.48479e-08	0.850123
RNU6-603P	7.5009e-08	0.850093
LINC02235	7.63791e-08	0.84984
AC021504.1	7.679e-08	0.849765
AC092844.1	7.93773e-08	0.8493
AC020891.2	7.95559e-08	0.849268
GRTP1-AS1	7.98508e-08	0.849216
AC233296.1	8.30431e-08	0.848664
ANKRD20A19P	8.67502e-08	0.848046
DAPK1-IT1	8.74309e-08	0.847935
RN7SL308P	8.89386e-08	0.847692
EIF2S2P2	9.29999e-08	0.847056
AC007563.4	9.38201e-08	0.84693
VWDE	9.45519e-08	0.846819
ALPK3	9.76838e-08	0.846352
AC243830.1	9.7868e-08	0.846325
LTBP4	1.03063e-07	0.845581
AC022217.2	1.06297e-07	0.845134
SLC29A2	1.06376e-07	0.845124
LINC01921	1.08274e-07	0.844868
AC002128.2	1.09613e-07	0.844689
AC018685.2	1.20181e-07	0.843346
AC105219.2	1.25808e-07	0.842674
AC079322.1	1.27317e-07	0.842499
AL390294.1	1.28761e-07	0.842332
AC079804.1	1.30156e-07	0.842173
JPX	1.33936e-07	0.84175
AL136379.1	1.34812e-07	0.841653
GOT2P3	1.40626e-07	0.841026
MSS51	1.42863e-07	0.84079
RNU6-137P	1.49446e-07	0.840117
AC092811.1	1.50719e-07	0.83999
SNRPCP13	1.50909e-07	0.839971
MIR3681HG	1.5459e-07	0.839609
RPS3AP29	1.56255e-07	0.839448
AC011752.1	1.57899e-07	0.83929
LINC02478	1.58472e-07	0.839236
AC009271.1	1.64518e-07	0.83867
AC073592.7	1.66571e-07	0.838483
AC007563.2	1.68996e-07	0.838263
GRIA1	1.6922e-07	0.838243
LINC01123	1.83575e-07	0.837003
GALNT18	1.88597e-07	0.836589
AC106820.5	1.89543e-07	0.836512
AC095057.3	2.05347e-07	0.835278
AC051619.6	2.06589e-07	0.835185
Z93943.1	2.13226e-07	0.834694
AC013652.1	2.24822e-07	0.833869
LINC00208	2.26291e-07	0.833768
SH2D2A	2.31053e-07	0.833442
NSUN6	2.31149e-07	0.833435
BX640515.1	2.36697e-07	0.833063
ALG1L5P	2.37354e-07	0.83302
RF02219	2.49022e-07	0.832264
RBM22P2	2.50776e-07	0.832153
ENO1P2	2.51454e-07	0.832111
AC092811.2	2.5259e-07	0.83204
GHRLOS	2.67312e-07	0.831141
RNU6-272P	2.72362e-07	0.830844
TRPV5	2.76177e-07	0.830622
AC095057.4	2.76885e-07	0.830581
MIR8057	2.81663e-07	0.830308
AC097493.1	2.8834e-07	0.829933
AC105916.1	3.06218e-07	0.828966
RN7SKP240	3.12737e-07	0.828626
AL360181.1	3.18397e-07	0.828336
AC023300.3	3.19227e-07	0.828294
AC013652.2	3.3071e-07	0.827721
AC008105.2	3.31511e-07	0.827681
RPL21P54	3.34368e-07	0.827542
AC135457.1	3.41103e-07	0.827217
BANF1P2	3.43338e-07	0.82711
LINC01905	3.45341e-07	0.827016
HMGB3P22	3.45764e-07	0.826996
MIR384	3.49872e-07	0.826803
COL18A1-AS2	3.53476e-07	0.826635
PRNCR1	3.59526e-07	0.826357
AC099535.1	3.61019e-07	0.826289
LINC00595	3.6177e-07	0.826255
AC006065.5	3.62811e-07	0.826208
RN7SKP212	3.68166e-07	0.825967
UPK3B	3.70346e-07	0.82587
AC091133.4	3.73427e-07	0.825734
AC068987.3	3.78165e-07	0.825526
AC020550.2	3.832e-07	0.825308
TMPRSS11F	4.00329e-07	0.824585
AC034229.2	4.0138e-07	0.824542
AC004771.4	4.09924e-07	0.824192
Z97653.1	4.10581e-07	0.824166
AC006511.4	4.11169e-07	0.824142
AC013268.4	4.14297e-07	0.824016
MIR4776-2	4.14401e-07	0.824012
AC120498.10	4.19439e-07	0.823811
AL359922.3	4.30323e-07	0.823383
AL450384.2	4.3395e-07	0.823243
TSBP1-AS1	4.41304e-07	0.822962
AC007557.1	4.48569e-07	0.822688
LYPD6B	4.52057e-07	0.822559
ALG1L12P	4.60875e-07	0.822234
AL683813.1	4.63516e-07	0.822138
IGHV3-75	4.68734e-07	0.821949
AC140479.2	4.72505e-07	0.821814
AP003031.1	4.7921e-07	0.821577
LINC02572	4.83822e-07	0.821415
NEURL2	4.88196e-07	0.821263
AC093797.1	4.96047e-07	0.820992
AL162151.3	4.97655e-07	0.820938
PDLIM4	4.98819e-07	0.820898
AC073909.1	5.04896e-07	0.820693
MIR624	5.05706e-07	0.820665
AL136313.1	5.0864e-07	0.820567
AL354751.1	5.10958e-07	0.82049
AC009961.3	5.11742e-07	0.820464
CBLN2	5.17009e-07	0.82029
PARGP1	5.1877e-07	0.820232
AC102953.2	5.19735e-07	0.8202
AP005203.1	5.25344e-07	0.820017
AC027682.6	5.45011e-07	0.81939
EEF1A1P30	5.45778e-07	0.819365
TAS2R41	5.58964e-07	0.818956
AC025175.1	5.71581e-07	0.818573
EEF1B2P5	5.86175e-07	0.818139
FAM66C	5.96388e-07	0.817841
AC138409.2	5.99855e-07	0.817741
TAS2R62P	6.12816e-07	0.817371
CCT5P2	6.51023e-07	0.81632
Z97198.1	6.52558e-07	0.816279
PERM1	6.87281e-07	0.815372
LINC00412	6.93127e-07	0.815224
AL592146.1	7.02834e-07	0.81498
AL583843.1	7.04696e-07	0.814933
ZSCAN1	7.0938e-07	0.814817
VN1R87P	7.11284e-07	0.814769
AC117498.3	7.148e-07	0.814683
RF00334	7.17126e-07	0.814625
AC018685.3	7.35292e-07	0.814184
AC015959.1	7.60235e-07	0.813594
AP000424.1	7.68017e-07	0.813414
AC009271.2	7.77545e-07	0.813195
MIR3667	7.83476e-07	0.81306
AC091027.1	8.00392e-07	0.81268
OR5B21	8.02375e-07	0.812636
AL731555.1	8.08949e-07	0.81249
PACRG	8.28129e-07	0.812072
AC079768.4	8.31145e-07	0.812007
PCBP1-AS1	8.33225e-07	0.811962
GAB4	8.61367e-07	0.811367
AC010504.1	8.78392e-07	0.811016
SRRM2-AS1	8.80519e-07	0.810972
OR7E7P	8.93625e-07	0.810706
AC120498.9	9.09412e-07	0.81039
MIR548H1	9.32841e-07	0.80993
RN7SL404P	9.36609e-07	0.809857
AC011247.2	9.37337e-07	0.809843
AC140479.7	9.42666e-07	0.809741
PPIAP71	9.43248e-07	0.809729
NMT2	9.67637e-07	0.809266
RNU6-945P	9.69941e-07	0.809223
AP003498.1	9.90153e-07	0.808848
CALY	9.94313e-07	0.808771
AC244035.1	1.00932e-06	0.808498
AC020922.3	1.02323e-06	0.808248
AL646090.2	1.02431e-06	0.808229
ATP1B1P1	1.02861e-06	0.808152
AC093865.1	1.03248e-06	0.808084
AP000829.1	1.05257e-06	0.807731
ACTA2-AS1	1.05409e-06	0.807704
AC025031.4	1.06803e-06	0.807463
AL732437.2	1.07527e-06	0.807339
AC027682.5	1.08055e-06	0.807249
AC006511.1	1.09526e-06	0.807
AC087269.1	1.09835e-06	0.806948
ATP6V1G1P4	1.10363e-06	0.80686
AC011306.1	1.10393e-06	0.806855
NNMT	1.12122e-06	0.806569
UGT1A5	1.12317e-06	0.806537
AC135782.2	1.15247e-06	0.806061
AC012158.1	1.16011e-06	0.805938
RNU1-78P	1.1611e-06	0.805922
SYCN	1.1611e-06	0.805922
AC008667.4	1.16117e-06	0.805921
AC122129.2	1.16697e-06	0.805829
NUP50-DT	1.17457e-06	0.805709
AC128709.2	1.17657e-06	0.805677
C22orf24	1.18182e-06	0.805594
BRWD1-AS1	1.2287e-06	0.804871
AC087289.2	1.23767e-06	0.804735
AL450043.1	1.24086e-06	0.804687
SNORD116-5	1.24779e-06	0.804584
AC022966.3	1.25964e-06	0.804407
AL353804.1	1.2842e-06	0.804046
VTI1BP3	1.29286e-06	0.80392
MIR325	1.30375e-06	0.803763
DNAH14	1.32098e-06	0.803516
C1QTNF8	1.32393e-06	0.803475
AKR1C8P	1.34016e-06	0.803246
AL450467.1	1.34669e-06	0.803154
AC092159.3	1.35354e-06	0.803059
AC108066.2	1.35365e-06	0.803057
AC113189.1	1.35524e-06	0.803035
AC074134.1	1.37307e-06	0.802789
AC061975.7	1.38008e-06	0.802693
AC099811.1	1.38733e-06	0.802594
AC024588.1	1.39476e-06	0.802493
AC104521.1	1.40638e-06	0.802336
AC092610.1	1.40695e-06	0.802329
AC004828.1	1.41421e-06	0.802231
AC010327.7	1.41833e-06	0.802176
AC008429.3	1.44528e-06	0.80182
AC096559.1	1.45875e-06	0.801644
AL121832.2	1.47401e-06	0.801446
AL356273.2	1.48148e-06	0.80135
AC011450.1	1.48637e-06	0.801288
TNFSF11	1.4892e-06	0.801251
CBX3P4	1.49815e-06	0.801138
Z93242.1	1.50093e-06	0.801102
AC005618.2	1.51187e-06	0.800964
RPSAP57	1.52686e-06	0.800776
MYL6P4	1.52854e-06	0.800755
LINC00992	1.53094e-06	0.800725
KRT8P11	1.53915e-06	0.800623
PGAM2	1.54279e-06	0.800578
AC104805.1	1.55349e-06	0.800446
GULP1	1.55364e-06	0.800444
AC092142.1	1.5618e-06	0.800344
AC092111.2	1.57201e-06	0.800219
KRT17P1	1.57641e-06	0.800166
STX17-AS1	1.58665e-06	0.800042
PCDH10	1.5994e-06	0.799889
AC005838.2	1.64219e-06	0.799382
PURG	1.67033e-06	0.799055
STRA6	1.69414e-06	0.798783
HSPE1P14	1.7096e-06	0.798607
LINC00601	1.71731e-06	0.798521
AL353691.2	1.71933e-06	0.798498
MFSD4B	1.73909e-06	0.798277
RBMXL2	1.74766e-06	0.798182
TAS2R60	1.76401e-06	0.798002
AC007861.1	1.76455e-06	0.797996
AC006511.2	1.7803e-06	0.797824
AC244034.2	1.78471e-06	0.797776
DTX2P1	1.81257e-06	0.797475
AC004771.2	1.81572e-06	0.797441
AC022919.1	1.86141e-06	0.796958
AC087294.1	1.88627e-06	0.7967
COL21A1	1.8885e-06	0.796677
HSPD1P8	1.93569e-06	0.796194
AC011997.1	1.93904e-06	0.796161
LINC01829	1.94702e-06	0.79608
AC009163.5	1.95669e-06	0.795983
DPRXP3	1.95779e-06	0.795972
AL450469.2	1.9698e-06	0.795853
AC103808.6	1.97935e-06	0.795758
AP000265.1	1.98707e-06	0.795681
LINC01106	2.02605e-06	0.7953
GAPDHP33	2.07811e-06	0.794801
PTPRK	2.07937e-06	0.794789
RN7SL648P	2.10613e-06	0.794537
AC009312.1	2.10747e-06	0.794524
LAGE3P1	2.11589e-06	0.794445
QRSL1P2	2.18777e-06	0.793785
SHANK1	2.20362e-06	0.793642
AL132796.3	2.20489e-06	0.79363
AC068790.5	2.22646e-06	0.793437
MARS2	2.22824e-06	0.793421
AC008522.1	2.24454e-06	0.793276
LINC00943	2.29558e-06	0.792829
AC091736.1	2.30223e-06	0.792772
AC079781.3	2.34157e-06	0.792434
HMGB1P33	2.34509e-06	0.792404
AL159156.1	2.44055e-06	0.791606
NANOGP5	2.47188e-06	0.79135
AL354707.3	2.48029e-06	0.791281
BX322639.1	2.48545e-06	0.79124
AC079336.3	2.52522e-06	0.790921
MIR181D	2.54153e-06	0.790791
MIR328	2.57614e-06	0.790519
AC051619.4	2.58061e-06	0.790484
ARHGAP19-SLIT1	2.62149e-06	0.790166
ZNF99	2.63625e-06	0.790053
TAPT1-AS1	2.733e-06	0.789323
AP000662.1	2.76611e-06	0.789078
AC008056.2	2.80656e-06	0.788783
DHFRP6	2.82625e-06	0.788641
AC006065.3	2.85815e-06	0.788412
DIRC3-AS1	2.86246e-06	0.788381
AC027796.1	2.87162e-06	0.788316
AC036222.2	2.8765e-06	0.788282
OR7E55P	2.88383e-06	0.78823
AC073342.1	2.88595e-06	0.788215
AC018742.1	2.88645e-06	0.788211
CAVIN4	2.88961e-06	0.788189
RPL7L1P2	2.93501e-06	0.78787
AC025165.2	2.99945e-06	0.787426
MYO16	3.00193e-06	0.787409
LINC02179	3.0083e-06	0.787365
AP001029.2	3.04583e-06	0.787111
AF146191.1	3.05674e-06	0.787037
AK4P6	3.05674e-06	0.787037
RNU6-953P	3.05674e-06	0.787037
Z73495.1	3.05674e-06	0.787037
AC003973.2	3.05674e-06	0.787037
AC008628.1	3.05674e-06	0.787037
AC023632.4	3.05674e-06	0.787037
AC026396.1	3.05674e-06	0.787037
AC027335.2	3.05674e-06	0.787037
AC079804.2	3.05674e-06	0.787037
AC093325.1	3.05674e-06	0.787037
AC093334.1	3.05674e-06	0.787037
AC116634.1	3.05674e-06	0.787037
AC137499.1	3.05674e-06	0.787037
AK4P5	3.05674e-06	0.787037
AL034345.1	3.05674e-06	0.787037
AL049646.2	3.05674e-06	0.787037
AL162384.1	3.05674e-06	0.787037
AL359821.1	3.05674e-06	0.787037
AL391987.3	3.05674e-06	0.787037
AL590004.2	3.05674e-06	0.787037
AP005119.1	3.05674e-06	0.787037
AP006216.3	3.05674e-06	0.787037
ATP5F1AP10	3.05674e-06	0.787037
GPAA1P2	3.05674e-06	0.787037
IFITM8P	3.05674e-06	0.787037
IGHV1OR15-6	3.05674e-06	0.787037
KRTAP1-1	3.05674e-06	0.787037
KRTAP9-4	3.05674e-06	0.787037
LINC01248	3.05674e-06	0.787037
MIR3197	3.05674e-06	0.787037
MIR4310	3.05674e-06	0.787037
MIR4535	3.05674e-06	0.787037
MIR4776-1	3.05674e-06	0.787037
MRPS10P1	3.05674e-06	0.787037
PRSS45P	3.05674e-06	0.787037
RNU6-1130P	3.05674e-06	0.787037
RNU6-1154P	3.05674e-06	0.787037
RNU6-289P	3.05674e-06	0.787037
RNU6-290P	3.05674e-06	0.787037
RNU6-504P	3.05674e-06	0.787037
RNU6-586P	3.05674e-06	0.787037
RNU6-855P	3.05674e-06	0.787037
RNU6-911P	3.05674e-06	0.787037
RNU7-119P	3.05674e-06	0.787037
RPL18AP14	3.05674e-06	0.787037
SIGLEC30P	3.05674e-06	0.787037
Z82173.1	3.05674e-06	0.787037
RNU1-27P	3.06139e-06	0.787006
Z85994.2	3.10288e-06	0.786729
PSD2	3.10397e-06	0.786722
AL354989.2	3.15286e-06	0.7864
ATP2C2-AS1	3.15935e-06	0.786358
ANKRD31	3.3219e-06	0.785321
LINC00200	3.33772e-06	0.785223
AL138781.2	3.41436e-06	0.784751
SFXN2	3.47538e-06	0.784383
PCAT1	3.48091e-06	0.78435
ZNF276	3.49412e-06	0.784271
RPL23P2	3.5256e-06	0.784084
ZNF66	3.56792e-06	0.783835
AC092111.1	3.59449e-06	0.78368
POU5F1B	3.64998e-06	0.783359
AC092118.1	3.75586e-06	0.782759
ALG13	3.75765e-06	0.782749
LINC00648	3.77563e-06	0.782649
AL050309.1	3.78949e-06	0.782572
OSBPL9P4	3.79121e-06	0.782563
MFAP1P1	3.94411e-06	0.78173
RF00432	3.97763e-06	0.781551
UBA6-AS1	3.9887e-06	0.781492
MIR1299	3.99216e-06	0.781474
GOLGA6L10	3.99506e-06	0.781458
AL157834.1	4.00417e-06	0.78141
AC025576.1	4.02679e-06	0.781291
AC016582.3	4.0755e-06	0.781036
AC009533.4	4.09384e-06	0.780941
LINC01165	4.14954e-06	0.780655
CASC15	4.16923e-06	0.780554
AC068726.1	4.17653e-06	0.780517
AC115622.1	4.19655e-06	0.780415
ADAMTS13	4.25548e-06	0.780119
AC108066.1	4.26081e-06	0.780092
DPY19L2P1	4.27566e-06	0.780018
AC092138.1	4.29839e-06	0.779905
AC061979.1	4.30279e-06	0.779883
EPHA1-AS1	4.30795e-06	0.779857
ST13P11	4.31388e-06	0.779828
RBM15-AS1	4.31711e-06	0.779812
GPS2P2	4.32168e-06	0.77979
CSRNP3	4.37941e-06	0.779506
RN7SL178P	4.47082e-06	0.779065
RNU11-6P	4.52346e-06	0.778814
THPO	4.5566e-06	0.778658
NBPF4	4.56085e-06	0.778638
AC124319.5	4.64717e-06	0.778235
RPS3AP37	4.72062e-06	0.777898
AC010536.1	4.7639e-06	0.777701
FTX	4.77072e-06	0.77767
RNU6-880P	4.81535e-06	0.777469
AC090206.1	4.86509e-06	0.777247
CFL1P1	4.92017e-06	0.777004
RPS3AP38	4.92056e-06	0.777002
ZFAT	4.92593e-06	0.776979
GRB7	5.01919e-06	0.776573
AC012435.1	5.02074e-06	0.776566
SLC22A14	5.10584e-06	0.776201
AC007618.1	5.12202e-06	0.776132
AC010894.3	5.17659e-06	0.775902
AC008269.1	5.17979e-06	0.775889
B4GALNT4	5.19822e-06	0.775811
AC084783.1	5.22303e-06	0.775708
ECHDC2	5.24579e-06	0.775613
UBE2V1P11	5.27343e-06	0.775499
DDX50P1	5.27733e-06	0.775482
AC245060.7	5.29072e-06	0.775427
LINC02675	5.311e-06	0.775344
AL021154.1	5.34629e-06	0.775199
AC231533.1	5.37637e-06	0.775077
LINC02657	5.4319e-06	0.774852
HERC2P4	5.45492e-06	0.77476
KCTD15	5.55086e-06	0.774378
FAM66A	5.75402e-06	0.773589
DNAH17-AS1	5.76634e-06	0.773542
AC005828.1	5.81019e-06	0.773375
AC112484.5	5.83819e-06	0.773269
LINC02575	5.86047e-06	0.773185
Z97192.3	5.88846e-06	0.77308
AC097381.3	5.95503e-06	0.772832
MIR494	5.95503e-06	0.772832
MIR7155	5.95503e-06	0.772832
SCOCP1	6.0044e-06	0.772649
AC083843.1	6.02286e-06	0.772581
AC006065.2	6.0555e-06	0.772462
HSBP1P1	6.07146e-06	0.772404
FAM86JP	6.09815e-06	0.772306
LINC00630	6.13138e-06	0.772186
ADAMTS20	6.14276e-06	0.772145
AC068234.3	6.1759e-06	0.772026
AC084026.1	6.18017e-06	0.77201
ZBTB25	6.20437e-06	0.771924
VPS9D1-AS1	6.27103e-06	0.771686
AC079447.1	6.33804e-06	0.77145
AC099811.5	6.39095e-06	0.771265
AC096642.1	6.45731e-06	0.771035
MBD5	6.45967e-06	0.771027
AC007996.1	6.52952e-06	0.770787
AC016769.5	6.58935e-06	0.770584
AC048344.3	6.8041e-06	0.769866
RF01983	6.8041e-06	0.769866
SNRPCP11	6.89563e-06	0.769566
LINC01137	6.89624e-06	0.769564
SORBS2	6.99835e-06	0.769234
TEX21P	7.02704e-06	0.769142
FREM3	7.15928e-06	0.768722
ADAM23	7.17238e-06	0.768681
AC018437.3	7.19873e-06	0.768598
AL645939.3	7.3103e-06	0.768251
DEFA5	7.3103e-06	0.768251
MIR4436A	7.3103e-06	0.768251
RN7SL565P	7.3103e-06	0.768251
RNU2-23P	7.3103e-06	0.768251
AL355512.1	7.37399e-06	0.768055
NRXN3	7.37974e-06	0.768037
AP003717.1	7.38093e-06	0.768034
FAM83H	7.4143e-06	0.767932
CFAP73	7.41792e-06	0.767921
TDH	7.49767e-06	0.767679
AC009533.3	7.52199e-06	0.767605
MIR548F2	7.55319e-06	0.767511
AC012306.3	7.61444e-06	0.767328
AL137129.1	7.65893e-06	0.767196
AC015920.1	7.86168e-06	0.766602
AL590762.2	7.86884e-06	0.766581
LINC02646	7.87874e-06	0.766552
AC254562.2	7.91986e-06	0.766434
AC053527.1	7.92536e-06	0.766418
AC009477.1	7.97454e-06	0.766277
PCNX4	8.02804e-06	0.766124
AC233266.2	8.10966e-06	0.765893
SNHG14	8.14873e-06	0.765783
AL031713.1	8.21768e-06	0.765591
AC010531.4	8.27265e-06	0.765438
ADAMTS12	8.27387e-06	0.765435
DIP2C	8.41375e-06	0.76505
C15orf53	8.4219e-06	0.765028
MINAR2	8.44406e-06	0.764968
LINC00304	8.46579e-06	0.764909
AL117327.1	8.50926e-06	0.764791
AC079385.2	8.51166e-06	0.764785
RN7SL231P	8.60254e-06	0.76454
STX18-AS1	8.67921e-06	0.764336
AL139339.2	8.68901e-06	0.76431
GSDMB	8.7857e-06	0.764055
AC113398.2	8.97351e-06	0.763567
AL645608.2	8.98004e-06	0.76355
AC110285.4	9.0393e-06	0.763398
ZBED3-AS1	9.19516e-06	0.763002
AC112484.1	9.20871e-06	0.762968
AL138720.1	9.34128e-06	0.762637
AC118755.2	9.34462e-06	0.762628
DPPA3P3	9.41614e-06	0.762451
PANO1	9.42002e-06	0.762442
AC243830.2	9.43596e-06	0.762402
TNNT3	9.49159e-06	0.762266
SLC25A2	9.49268e-06	0.762263
AP003071.3	9.52648e-06	0.76218
MIATNB	9.5271e-06	0.762179
SLC6A16	9.5685e-06	0.762078
AL133467.2	9.63637e-06	0.761913
AL049795.1	9.67637e-06	0.761817
AC093330.2	9.70223e-06	0.761755
AC106820.2	9.73477e-06	0.761677
SNAPC1	9.7385e-06	0.761668
FAM66D	9.77891e-06	0.761571
AL355922.2	9.78377e-06	0.761559
ASH2LP3	9.88812e-06	0.761312
XXYLT1	9.98479e-06	0.761084
AL353801.1	1.00217e-05	0.760998
CYP2C8	1.00472e-05	0.760938
SLC39A1	1.01698e-05	0.760654
ITGA10	1.01943e-05	0.760598
AC092375.3	1.02376e-05	0.760499
BNIP3P15	1.02909e-05	0.760377
AC064850.1	1.03221e-05	0.760306
AC008443.8	1.03354e-05	0.760276
IGLV1-50	1.03562e-05	0.760228
HIBCH	1.04244e-05	0.760074
RARSP1	1.04361e-05	0.760048
AC021851.1	1.05058e-05	0.759891
RNU6-705P	1.06224e-05	0.759632
AC115282.2	1.06425e-05	0.759587
AC131097.1	1.07108e-05	0.759436
RCBTB2P1	1.07379e-05	0.759377
BCAS3	1.07534e-05	0.759343
METTL11B	1.07793e-05	0.759286
IGHV3-76	1.0868e-05	0.759093
AL354760.1	1.10203e-05	0.758764
AL353593.3	1.10346e-05	0.758733
AC068790.3	1.10627e-05	0.758673
CR392000.2	1.10714e-05	0.758654
PRKCG	1.11564e-05	0.758473
AL451054.1	1.11613e-05	0.758463
PPIAP70	1.11978e-05	0.758385
AC010931.3	1.12239e-05	0.75833
MIR30E	1.13289e-05	0.75811
AL356218.1	1.13841e-05	0.757994
DNM1P47	1.14116e-05	0.757937
AL138752.1	1.15424e-05	0.757666
AC048380.2	1.1641e-05	0.757464
AC078846.1	1.17098e-05	0.757324
CYP1A1	1.17296e-05	0.757284
AC093155.1	1.18509e-05	0.757038
AC079142.1	1.19177e-05	0.756904
ZBTB16	1.19427e-05	0.756854
AC026954.1	1.20957e-05	0.75655
SMIM9	1.2111e-05	0.75652
RNU6-340P	1.232e-05	0.756111
SLC9B1	1.25156e-05	0.755733
AC023024.1	1.26085e-05	0.755556
BX321878.1	1.26161e-05	0.755541
AC023794.6	1.26413e-05	0.755494
AC068790.4	1.27552e-05	0.755278
AC097359.3	1.27883e-05	0.755216
BMPR1AP2	1.29288e-05	0.754953
MIR3686	1.29731e-05	0.75487
NBPF6	1.30347e-05	0.754756
Z85996.3	1.32528e-05	0.754356
C1QTNF3-AMACR	1.32932e-05	0.754283
LINC01284	1.3477e-05	0.753951
MIR570	1.35382e-05	0.753841
RN7SL378P	1.35712e-05	0.753782
LINC01221	1.35998e-05	0.753731
LINC00310	1.3764e-05	0.75344
SLC16A10	1.39088e-05	0.753186
AC068700.1	1.39251e-05	0.753158
LINC01488	1.39888e-05	0.753047
SLC28A1	1.39961e-05	0.753035
AC100827.1	1.40326e-05	0.752971
TDRD15	1.40786e-05	0.752892
MTA3	1.40839e-05	0.752883
AC244197.2	1.42782e-05	0.752549
SNORD116-11	1.43307e-05	0.75246
AC007922.1	1.43392e-05	0.752446
LINC01099	1.43427e-05	0.75244
PLA2G3	1.44026e-05	0.752338
ZNF235	1.44792e-05	0.752209
RNU6-227P	1.46349e-05	0.751948
AC006065.4	1.47636e-05	0.751734
RNU6-770P	1.47781e-05	0.75171
AC079781.5	1.496e-05	0.751411
AC091826.1	1.51884e-05	0.75104
ALMS1P1	1.5296e-05	0.750866
CASQ1	1.53979e-05	0.750703
CYP2J2	1.55442e-05	0.750471
Z99129.3	1.55924e-05	0.750395
AC008410.1	1.58339e-05	0.750017
AL132712.2	1.61185e-05	0.749578
LINC01565	1.61274e-05	0.749564
AC027682.2	1.64082e-05	0.749137
POM121L1P	1.67849e-05	0.748575
REV3L-IT1	1.67947e-05	0.748561
AL390037.1	1.68196e-05	0.748524
RNY3P2	1.68199e-05	0.748524
AL031705.1	1.68847e-05	0.748428
ZNF112	1.68974e-05	0.74841
AC022121.1	1.69689e-05	0.748305
AC006329.1	1.70135e-05	0.74824
AC107214.1	1.70505e-05	0.748186
MIR4427	1.70856e-05	0.748135
AC011726.2	1.71472e-05	0.748045
MIR7973-1	1.72542e-05	0.74789
AC023790.2	1.72894e-05	0.74784
MIR3154	1.73101e-05	0.74781
MIR3163	1.73881e-05	0.747698
AC104164.1	1.74131e-05	0.747662
AL008726.1	1.74266e-05	0.747643
AC007610.1	1.74316e-05	0.747636
LINC02018	1.75435e-05	0.747477
RPS7P6	1.75874e-05	0.747414
TLCD2	1.76259e-05	0.74736
AC009643.2	1.78089e-05	0.747102
AC013268.1	1.78089e-05	0.747102
MIR4454	1.78089e-05	0.747102
RPS4XP15	1.78089e-05	0.747102
MIR4677	1.78127e-05	0.747097
AC077690.1	1.78301e-05	0.747072
LINC02232	1.80268e-05	0.746798
PPP1R1C	1.8234e-05	0.746512
AP001029.3	1.85012e-05	0.746148
ERVE-1	1.86772e-05	0.745911
SWT1	1.87311e-05	0.745838
AC139149.1	1.88939e-05	0.745621
CHRD	1.89517e-05	0.745544
FO538757.1	1.90323e-05	0.745437
TNS4	1.90576e-05	0.745404
AL672277.1	1.92617e-05	0.745136
AL359273.1	1.92674e-05	0.745128
EIPR1-IT1	1.96443e-05	0.74464
AC129492.2	1.99841e-05	0.744206
AC008507.4	1.99845e-05	0.744206
AC002429.1	2.01967e-05	0.743939
AL157834.2	2.03673e-05	0.743726
AC106820.3	2.05922e-05	0.743447
AL500527.1	2.05994e-05	0.743438
AL669970.2	2.06847e-05	0.743333
AZIN1-AS1	2.07759e-05	0.743222
TGFB3	2.08552e-05	0.743125
HNRNPA1P5	2.10328e-05	0.742909
HCG18	2.11929e-05	0.742716
AC011491.3	2.13432e-05	0.742536
Z97192.2	2.13544e-05	0.742523
MRGPRF-AS1	2.13693e-05	0.742505
AC022296.2	2.13946e-05	0.742475
MIR766	2.14354e-05	0.742426
AC018552.2	2.14359e-05	0.742426
AL022401.1	2.14868e-05	0.742365
AC004828.2	2.16718e-05	0.742146
AL645608.6	2.16925e-05	0.742122
NDUFA6-DT	2.17093e-05	0.742102
PPIAP77	2.19517e-05	0.741819
LINC00336	2.19763e-05	0.74179
AL645608.7	2.19814e-05	0.741784
AJ271736.1	2.21876e-05	0.741545
AC120498.6	2.24036e-05	0.741297
AL583810.2	2.24228e-05	0.741275
AC019226.1	2.26073e-05	0.741065
OLFM5P	2.26782e-05	0.740985
RN7SL685P	2.27091e-05	0.74095
LINC01934	2.27438e-05	0.740911
AL031779.1	2.30838e-05	0.740529
ITGB8	2.31506e-05	0.740455
YWHAZP4	2.31674e-05	0.740436
CCDC166	2.35008e-05	0.740069
AC084125.4	2.36432e-05	0.739913
AC067838.1	2.37822e-05	0.739762
SKP1P1	2.3811e-05	0.73973
AC091027.2	2.38128e-05	0.739728
AP001065.2	2.40454e-05	0.739477
AL356747.1	2.42745e-05	0.739232
AP005131.6	2.45963e-05	0.738892
AC023043.2	2.46764e-05	0.738807
SCART1	2.48176e-05	0.738659
AL158212.4	2.48969e-05	0.738577
AL450384.1	2.49305e-05	0.738542
TMEM161B-AS1	2.50218e-05	0.738447
KLHL3	2.50579e-05	0.738409
LINC01904	2.52696e-05	0.738191
AC116317.1	2.52725e-05	0.738188
FOXA3	2.53623e-05	0.738096
AC008147.2	2.54617e-05	0.737994
ASH1L-IT1	2.5473e-05	0.737983
ADCYAP1	2.54933e-05	0.737962
AC113208.1	2.55484e-05	0.737906
AC009435.1	2.56824e-05	0.73777
MRPL35P4	2.56824e-05	0.73777
AP000266.1	2.57559e-05	0.737695
AC007126.1	2.62645e-05	0.737186
UCN3	2.63239e-05	0.737127
UBE2Q2P2	2.66887e-05	0.736767
AC003092.2	2.68384e-05	0.736621
AC116612.1	2.68384e-05	0.736621
ABCB5	2.69096e-05	0.736551
TRAF3IP2-AS1	2.70939e-05	0.736373
HMGB1P19	2.70948e-05	0.736372
BX842559.2	2.7095e-05	0.736372
AP001628.1	2.71495e-05	0.736319
HOXB2	2.72431e-05	0.736229
AF131215.4	2.75008e-05	0.735982
BCRP1	2.75652e-05	0.735921
AC022296.3	2.80266e-05	0.735485
MIR4435-2	2.827e-05	0.735257
AL117350.1	2.83789e-05	0.735156
SPATA25	2.854e-05	0.735007
AL008729.1	2.89628e-05	0.734619
MIR4786	2.93818e-05	0.73424
GPR32	2.94109e-05	0.734213
IGKV2OR22-4	2.96974e-05	0.733957
ZKSCAN2-DT	2.98878e-05	0.733788
PLAC8L1	2.98912e-05	0.733785
FTLP12	3.00734e-05	0.733624
AC024563.2	3.02728e-05	0.733448
AL133467.4	3.03259e-05	0.733402
AC009159.1	3.0381e-05	0.733354
MTCO3P20	3.03823e-05	0.733353
GRAMD2A	3.04764e-05	0.733271
KRT18P26	3.06404e-05	0.733128
SNORD113-2	3.08638e-05	0.732935
AC018629.1	3.08725e-05	0.732928
AC112484.3	3.10164e-05	0.732804
AC008278.1	3.12846e-05	0.732575
EIF4A2P2	3.12958e-05	0.732565
AKR1C5P	3.12984e-05	0.732563
THADA	3.14035e-05	0.732474
RF02197	3.14725e-05	0.732415
RFPL2	3.16897e-05	0.732232
LINC00843	3.19343e-05	0.732027
AC087203.3	3.20626e-05	0.73192
TTC28-AS1	3.24196e-05	0.731624
AC068790.7	3.26487e-05	0.731435
AF131215.3	3.28124e-05	0.731301
AC022196.1	3.29239e-05	0.731211
OTOGL	3.29688e-05	0.731174
CALML6	3.32864e-05	0.730917
LCN12	3.33428e-05	0.730872
AC138904.1	3.3392e-05	0.730832
IFI27	3.34707e-05	0.730769
RNU6-26P	3.37458e-05	0.730549
PLA2G4F	3.3826e-05	0.730485
MUC20P1	3.412e-05	0.730253
PCBD2	3.41585e-05	0.730222
AC009065.7	3.4245e-05	0.730154
PDCL3P4	3.43794e-05	0.730049
AC007610.5	3.46384e-05	0.729847
AC024563.1	3.4888e-05	0.729653
CCDC187	3.52493e-05	0.729375
AC073592.2	3.53115e-05	0.729328
AP003354.1	3.5455e-05	0.729218
C4orf36	3.54696e-05	0.729207
MIR596	3.55197e-05	0.729169
RN7SKP185	3.57381e-05	0.729003
AP003716.1	3.61828e-05	0.728668
OBSCN	3.67261e-05	0.728264
RN7SL79P	3.7501e-05	0.727697
TMEM44-AS1	3.75423e-05	0.727667
AC024575.1	3.80453e-05	0.727305
AC078980.1	3.80807e-05	0.72728
AKR1C7P	3.81245e-05	0.727248
ST13P12	3.82615e-05	0.727151
MIR4526	3.89728e-05	0.726648
AC127024.5	3.89769e-05	0.726645
TRDMT1	3.90527e-05	0.726592
BGLT3	3.91269e-05	0.72654
AL356299.2	3.93131e-05	0.72641
AL513327.2	3.96094e-05	0.726205
AC012363.1	3.98588e-05	0.726033
AC091705.1	3.99634e-05	0.725961
AC092745.3	4.00578e-05	0.725897
BRS3	4.02457e-05	0.725768
C22orf34	4.08541e-05	0.725357
AC018620.1	4.08632e-05	0.72535
AC008267.4	4.09038e-05	0.725323
DDX11L2	4.09438e-05	0.725296
EEF1GP7	4.09465e-05	0.725294
GJC2	4.09503e-05	0.725292
AC020915.2	4.16257e-05	0.724842
GATA2-AS1	4.18193e-05	0.724714
MIR4441	4.18754e-05	0.724677
AL031864.1	4.23068e-05	0.724395
CDRT4	4.30243e-05	0.72393
AC005262.2	4.30981e-05	0.723883
AL353651.3	4.32558e-05	0.723782
NPIPA2	4.34129e-05	0.723682
AC092939.1	4.39131e-05	0.723365
CLEC18B	4.39301e-05	0.723354
RN7SL233P	4.39489e-05	0.723342
AC004980.1	4.3998e-05	0.723311
ACTG1P17	4.40983e-05	0.723248
EFHB	4.42752e-05	0.723137
AC025572.1	4.43725e-05	0.723076
MGAT4EP	4.58823e-05	0.722146
AL513218.1	4.58852e-05	0.722145
AC012313.10	4.58906e-05	0.722141
FAM66B	4.58908e-05	0.722141
LRRC37A3	4.60153e-05	0.722066
RPS4XP16	4.60908e-05	0.72202
SLC22A13	4.63108e-05	0.721887
LINC02626	4.66825e-05	0.721664
RN7SL220P	4.66972e-05	0.721656
AC015802.1	4.7459e-05	0.721204
AC138965.3	4.76394e-05	0.721098
SCAND2P	4.78075e-05	0.720999
AC006027.1	4.78748e-05	0.72096
HBG2	4.7907e-05	0.720941
RN7SL581P	4.83495e-05	0.720683
CDC42BPG	4.84815e-05	0.720607
LINC01611	4.84949e-05	0.720599
RPL7AP58	4.8584e-05	0.720548
AC004023.1	4.88991e-05	0.720366
AC034102.8	4.89189e-05	0.720355
C9orf147	4.93876e-05	0.720087
MUC5B	4.95144e-05	0.720015
LRIG2	4.955e-05	0.719995
AC112184.1	4.97131e-05	0.719903
AC091978.1	4.97677e-05	0.719872
AC126323.1	5.03124e-05	0.719566
TAS2R3	5.07039e-05	0.719348
CABP4	5.09019e-05	0.719238
EIF1B-AS1	5.0979e-05	0.719195
PRSS51	5.12246e-05	0.719059
RN7SL751P	5.13956e-05	0.718965
PFKFB1	5.16459e-05	0.718828
AC020612.1	5.2416e-05	0.71841
RPSAP53	5.24834e-05	0.718374
AL137918.1	5.30334e-05	0.718079
BDNF-AS	5.41648e-05	0.71748
FP236241.1	5.42192e-05	0.717451
AC007842.1	5.43002e-05	0.717409
MIR128-1	5.4399e-05	0.717357
AF131215.6	5.44839e-05	0.717313
AP002812.4	5.47043e-05	0.717198
VWA8-AS1	5.49001e-05	0.717097
XPNPEP2	5.50399e-05	0.717024
AL133241.1	5.52504e-05	0.716916
AC026888.1	5.57748e-05	0.716647
RAB11B-AS1	5.62775e-05	0.716391
TCL6	5.66665e-05	0.716194
PKMP3	5.66944e-05	0.71618
AC007878.1	5.68322e-05	0.716111
AL627308.2	5.72909e-05	0.715881
CCT4P2	5.73756e-05	0.715839
AL359710.1	5.7879e-05	0.715589
AC007749.1	5.80482e-05	0.715506
AL355304.1	5.82598e-05	0.715401
TMEM125	5.85508e-05	0.715259
CUBN	5.8615e-05	0.715227
AL512631.1	5.86953e-05	0.715188
RNA5SP283	5.87023e-05	0.715185
AL096870.8	5.87075e-05	0.715182
AC017007.3	5.88211e-05	0.715127
AL135910.1	5.8887e-05	0.715095
INTS6-AS1	5.90835e-05	0.714999
PPIAL4H	5.91225e-05	0.71498
AC079780.1	5.92045e-05	0.71494
AC009019.2	5.95781e-05	0.71476
CYCSP34	5.9579e-05	0.714759
WWC1	5.9594e-05	0.714752
AC046185.3	5.97251e-05	0.714689
AC009054.1	5.98502e-05	0.714629
LINC00159	5.99009e-05	0.714604
ZNF488	6.0008e-05	0.714553
CPO	6.01577e-05	0.714482
RN7SL801P	6.04348e-05	0.714349
RPL7AP9	6.05178e-05	0.71431
AC105339.1	6.06117e-05	0.714265
C5orf63	6.14553e-05	0.713867
AC099677.2	6.16721e-05	0.713766
ARF4P4	6.18561e-05	0.71368
AC008462.1	6.20035e-05	0.713611
LINC00622	6.25415e-05	0.713362
RN7SL658P	6.28254e-05	0.713231
NRIR	6.29956e-05	0.713153
RPS3AP22	6.34264e-05	0.712955
RF02135	6.34288e-05	0.712954
STXBP4	6.35544e-05	0.712897
HHIPL2	6.41995e-05	0.712605
MYL6P2	6.433e-05	0.712546
PPP1R9A	6.44422e-05	0.712495
LINC00313	6.47069e-05	0.712376
LINC00562	6.47147e-05	0.712373
AC005703.4	6.48594e-05	0.712308
ANKRD23	6.55597e-05	0.711996
AC008761.1	6.56309e-05	0.711965
CCDC154	6.58326e-05	0.711876
AP001582.1	6.58385e-05	0.711873
MIR499B	6.5976e-05	0.711813
RN7SKP58	6.60177e-05	0.711794
RPL37P18	6.63562e-05	0.711645
AC146507.3	6.75904e-05	0.711109
AC006252.1	6.80561e-05	0.710909
RN7SL526P	6.82551e-05	0.710823
ZNF285	6.83896e-05	0.710766
Z83843.1	6.84484e-05	0.710741
AC055855.2	6.89125e-05	0.710543
AL357552.2	6.94105e-05	0.710333
POU1F1	6.94639e-05	0.71031
RF00271	7.10733e-05	0.70964
LINC02561	7.10966e-05	0.70963
AP001029.1	7.13505e-05	0.709525
AP001619.1	7.17622e-05	0.709357
AC005410.1	7.20265e-05	0.709249
ZNF213-AS1	7.22595e-05	0.709154
AL136360.1	7.25049e-05	0.709054
C17orf99	7.30126e-05	0.708849
AC025031.5	7.3313e-05	0.708728
TMEM88	7.35829e-05	0.70862
GOLT1A	7.50849e-05	0.708024
MIR626	7.51879e-05	0.707984
MTG1	7.53813e-05	0.707908
CD247	7.5633e-05	0.707809
AC009053.1	7.74649e-05	0.707101
OR7M1P	7.7565e-05	0.707063
AL132796.2	7.75774e-05	0.707058
AC008121.1	7.76057e-05	0.707047
ZFHX2-AS1	7.77865e-05	0.706978
AC146507.2	7.81464e-05	0.706841
ZNF443	7.83321e-05	0.706771
AC087269.2	7.88043e-05	0.706593
BNIP3P28	7.95446e-05	0.706315
RNU4-84P	7.95446e-05	0.706315
AC009120.1	7.95586e-05	0.70631
CYP21A1P	7.97711e-05	0.70623
SLC38A3	8.05403e-05	0.705945
FSTL4	8.0834e-05	0.705836
FUT10	8.10371e-05	0.705762
POU5F1P5	8.11754e-05	0.705711
MIR4743	8.14581e-05	0.705607
AC113146.1	8.1894e-05	0.705448
ACTG1P16	8.22803e-05	0.705308
AC010186.3	8.27442e-05	0.70514
TMEM9B-AS1	8.29654e-05	0.70506
C2orf92	8.29921e-05	0.70505
AL359878.2	8.33652e-05	0.704916
AC092646.2	8.40962e-05	0.704655
RPEP1	8.42351e-05	0.704606
UQCRHP3	8.50077e-05	0.704332
AC012213.2	8.51038e-05	0.704298
AC079776.5	8.57242e-05	0.704081
AC005899.5	8.58605e-05	0.704033
AC073842.1	8.60783e-05	0.703957
AC004522.2	8.7032e-05	0.703626
AL590822.1	8.71086e-05	0.7036
AL391419.1	8.73456e-05	0.703518
AC068987.2	8.83666e-05	0.703168
RN7SL219P	8.83775e-05	0.703165
AC005746.1	8.87197e-05	0.703048
TAMM41	8.94868e-05	0.702789
RNF103-CHMP3	8.96706e-05	0.702727
GAL3ST2	8.97293e-05	0.702707
ZNF226	9.11847e-05	0.702221
FUNDC2P4	9.13367e-05	0.702171
MIR1296	9.13407e-05	0.70217
AC011008.2	9.13442e-05	0.702169
MRPL45P2	9.1507e-05	0.702115
AL590664.1	9.1658e-05	0.702065
AC027796.2	9.22177e-05	0.701881
MIR4746	9.23641e-05	0.701833
SEPT7P9	9.32839e-05	0.701533
PRC1-AS1	9.34895e-05	0.701466
AL583722.3	9.36546e-05	0.701413
AC079416.2	9.39008e-05	0.701333
AP006333.1	9.447e-05	0.70115
MIR3691	9.47484e-05	0.70106
AL445669.2	9.52474e-05	0.700901
AC090061.1	9.59904e-05	0.700665
AF131215.2	9.62529e-05	0.700581
TSNAXIP1	9.62745e-05	0.700575
AC004241.4	9.65582e-05	0.700485
LINC00365	9.66735e-05	0.700449
GRAPL	9.68467e-05	0.700394
DPF3	9.71539e-05	0.700298
AL450326.2	9.81036e-05	0.700002
ARPC4-TTLL3	9.84581e-05	0.699892
MRGPRG	9.89074e-05	0.699753
AL132780.2	9.89277e-05	0.699746
GOLGA2P10	9.95784e-05	0.699546
MTND2P2	9.97977e-05	0.699479
AC242426.1	0.00010009	0.69939
CLHC1	0.000101024	0.699106
RNU2-37P	0.000102079	0.698788
KRTAP19-8	0.000102342	0.698709
AC092115.3	0.000102892	0.698544
CEP112	0.000104162	0.698168
AC091144.2	0.000104767	0.69799
MAGI1-IT1	0.000105123	0.697886
RPL11P3	0.000105177	0.69787
AC092835.1	0.000105313	0.69783
AC008760.1	0.000105965	0.69764
AL359962.1	0.000106426	0.697507
AC010186.4	0.00010663	0.697448
AC005225.2	0.000107261	0.697266
AC006270.2	0.000107335	0.697245
PTCHD1	0.000107449	0.697212
LINC02370	0.000107586	0.697173
AC096642.2	0.00010796	0.697066
RPS27P16	0.000108167	0.697007
AL035458.2	0.000108977	0.696776
IGHVII-74-1	0.000109353	0.69667
RN7SL239P	0.000110155	0.696444
AL136304.1	0.000110877	0.696242
AC087292.1	0.000111491	0.696071
AL033529.1	0.000111508	0.696066
MIR5787	0.000111508	0.696066
MTHFD2P3	0.000111508	0.696066
RNU6-221P	0.000111508	0.696066
SLC35G1	0.000112026	0.695923
AP002815.1	0.000112232	0.695866
MIR4771-2	0.000112315	0.695843
OR2C3	0.00011291	0.695679
MIR658	0.000113031	0.695646
AC012184.4	0.000113149	0.695613
AC113133.1	0.00011366	0.695474
AC073107.1	0.000114205	0.695325
AC105020.4	0.000114383	0.695277
TMEM254-AS1	0.000114483	0.69525
AC105941.1	0.000115571	0.694956
GFAP	0.00011618	0.694792
GRAP	0.000116243	0.694775
VWA5B2	0.000116399	0.694733
SUGT1P2	0.000116477	0.694713
ZNF33B	0.000117049	0.69456
AC139792.3	0.0001171	0.694546
ZNF239	0.000117734	0.694378
LINC02615	0.000119083	0.694023
AC008758.2	0.000119546	0.693902
AL121917.1	0.000119657	0.693873
AC007688.2	0.000119859	0.69382
AL137244.1	0.00012038	0.693684
AC092471.2	0.000120748	0.693589
AL365181.1	0.00012078	0.693581
AC008013.1	0.000121738	0.693333
AC007041.1	0.000123361	0.692919
CAPRIN2	0.000123489	0.692886
SFR1P1	0.000123888	0.692785
AC010894.4	0.000124573	0.692612
LINC02367	0.000125833	0.692296
AC073569.2	0.000125915	0.692275
SUPT3H	0.000126216	0.6922
MIR3138	0.000126508	0.692128
AC091167.6	0.000126808	0.692053
PJVK	0.000127703	0.691832
AC008507.5	0.000128063	0.691743
MIR1200	0.000128401	0.69166
GAPDHP45	0.0001285	0.691636
KYAT1	0.000128572	0.691618
MIR3125	0.000128874	0.691544
SYNC	0.000129299	0.691441
AC073316.1	0.00012947	0.691399
LINC02648	0.000129869	0.691302
MTCO1P19	0.000130383	0.691177
HIF3A	0.000130921	0.691047
AQP4-AS1	0.000131095	0.691005
AL157834.3	0.000131217	0.690976
AC020594.1	0.00013156	0.690893
HNRNPH1P1	0.000134325	0.690235
AC109361.1	0.000134468	0.690201
MIR486-2	0.000135567	0.689944
CNPY1	0.000136432	0.689742
AC096661.1	0.000137076	0.689592
AC010336.4	0.00013747	0.689501
RPL5P18	0.000139007	0.689147
AC009120.2	0.000139053	0.689137
AC019118.2	0.000139218	0.689099
RNU6-1319P	0.000139748	0.688978
NKAPP1	0.000140253	0.688864
AC105133.2	0.000140575	0.68879
AC108021.1	0.000140575	0.68879
CADM3-AS1	0.000140672	0.688768
PRR4	0.000141501	0.688581
RNA5SP385	0.000142602	0.688334
PFN5P	0.000142926	0.688261
FO393419.3	0.000142931	0.68826
AC022113.1	0.000143845	0.688057
AC141557.1	0.000144212	0.687975
AC020611.1	0.000144692	0.687869
SPON1-AS1	0.000144818	0.687841
HDAC8	0.000144957	0.687811
PLXNA3	0.000145916	0.6876
MIR3683	0.000145934	0.687596
GALNT2	0.000146385	0.687497
AC087878.1	0.000148093	0.687125
MAGEA8-AS1	0.000148742	0.686985
TRIM51BP	0.00014951	0.68682
MIR181B2	0.000149697	0.68678
GLIPR1L2	0.000150033	0.686708
PDE1C	0.000150581	0.68659
AACSP1	0.000150587	0.686589
AC068134.4	0.000151087	0.686483
AC106782.1	0.000151248	0.686448
AC024958.1	0.000152401	0.686204
MIR148B	0.00015254	0.686175
AC079416.1	0.000152778	0.686125
ZNF69	0.000155546	0.685546
ZBTB11-AS1	0.00015603	0.685446
AL356317.1	0.000156034	0.685445
MIR30C1	0.000156153	0.685421
OR7E38P	0.000156554	0.685338
RN7SL428P	0.000156678	0.685312
AC068631.1	0.000156935	0.685259
AC245060.3	0.000157155	0.685214
ACSF3	0.000157953	0.68505
AL022326.2	0.000158678	0.684902
AL137074.1	0.000158815	0.684874
GAPDHP22	0.00015959	0.684717
CAMK2B	0.000159743	0.684686
PKMP5	0.000160371	0.684559
AC011726.3	0.000161142	0.684403
AC022211.4	0.000162405	0.68415
AC104791.2	0.000162967	0.684038
AL353651.1	0.000163119	0.684008
BEST4	0.000163223	0.683987
A1BG-AS1	0.000163395	0.683953
MTCO1P35	0.000163659	0.683901
AL589986.1	0.000163955	0.683842
AL138694.1	0.000164623	0.68371
AC105180.1	0.000166523	0.683337
IQSEC3P1	0.000167193	0.683206
AC097103.1	0.000167973	0.683055
AC022201.2	0.000168531	0.682947
IGKV1D-22	0.000168632	0.682927
AC234782.2	0.000168784	0.682898
AP000350.6	0.000169555	0.682749
AF131216.3	0.000169946	0.682674
AC007563.1	0.000170404	0.682586
RPL5P35	0.000170602	0.682549
RPS27AP18	0.000170934	0.682485
MIR5588	0.000171176	0.682439
PRELID3A	0.000174037	0.681897
MTCO1P54	0.000175186	0.681682
AC091196.1	0.000175958	0.681538
RNF152P1	0.000176073	0.681517
AC037487.1	0.000176816	0.681379
AC068298.1	0.000178624	0.681045
AC068491.4	0.000179179	0.680943
AL603914.1	0.000180778	0.680651
RNU6-45P	0.000181707	0.680483
ZBED1P1	0.000182159	0.680401
LINC02071	0.00018264	0.680314
DANT2	0.000182942	0.68026
RN7SL856P	0.000184238	0.680027
AC084125.1	0.000185001	0.679891
RSAD2	0.000185505	0.679802
C6orf163	0.000185833	0.679743
RN7SL204P	0.000186048	0.679705
AL669970.3	0.000186543	0.679617
AL592291.1	0.000189386	0.679118
AC010735.2	0.000189819	0.679042
AL354993.2	0.000189978	0.679015
RPL6P8	0.000192377	0.678599
AL161756.1	0.000193068	0.678481
AC046134.2	0.000193177	0.678462
ZNF717	0.000194163	0.678293
Z95118.2	0.000194257	0.678277
CDC42EP2	0.000194345	0.678262
CCDC30	0.000194891	0.678169
INTU	0.000195254	0.678107
LINC00596	0.000196522	0.677892
FUOM	0.000197015	0.677809
TFB1M	0.000197578	0.677714
ENPP5	0.000198707	0.677525
PMFBP1	0.000200119	0.677289
AP000553.1	0.000200796	0.677177
MSR1	0.000201105	0.677126
AP005131.7	0.000201747	0.677019
AP003071.1	0.000201765	0.677016
MTAP	0.000202486	0.676898
RN7SL397P	0.000203766	0.676687
AC079298.1	0.000204541	0.676561
AC009495.1	0.000204755	0.676526
RNU4-16P	0.000204973	0.67649
RNU1-58P	0.000205656	0.676379
ACOXL	0.000205737	0.676366
AF131215.5	0.000206057	0.676314
AC021483.1	0.000206224	0.676287
TCL1B	0.000207119	0.676142
AC107952.2	0.000207825	0.676029
ATOH7	0.000209705	0.675727
AC068896.1	0.000210894	0.675538
PABPC1L	0.00021195	0.67537
FAHD2CP	0.0002123	0.675315
TMEM234	0.000213342	0.675151
MORN1	0.000213442	0.675135
AC063944.3	0.000213488	0.675128
AL391244.1	0.000215354	0.674836
CU633967.1	0.000215668	0.674787
AC044860.1	0.000215879	0.674754
AC018766.1	0.000216268	0.674693
AL138963.1	0.000216271	0.674693
RN7SL269P	0.000217586	0.674489
AL080317.1	0.000218693	0.674318
AL121834.1	0.000218701	0.674317
AC004858.1	0.000219525	0.67419
AL135999.2	0.000220637	0.67402
DNM1P35	0.000221188	0.673936
ZNF44	0.000221562	0.673879
SCAPER	0.0002228	0.673691
AL162431.2	0.000222826	0.673687
AC010336.1	0.000222838	0.673686
AC013553.4	0.000223146	0.673639
CYCSP28	0.000223787	0.673542
ARMC12	0.000224816	0.673387
AL591167.1	0.000227501	0.672986
ASNS	0.000227911	0.672925
CKLF	0.000228645	0.672816
MYT1	0.000228667	0.672813
AP000446.1	0.000228927	0.672774
KNCN	0.000229215	0.672732
AC244197.3	0.000229451	0.672697
AC006499.5	0.000230023	0.672613
RN7SL246P	0.000231706	0.672365
AC009961.1	0.000232795	0.672206
AL159972.1	0.000232933	0.672186
AC004593.2	0.000234192	0.672003
AC024224.1	0.000234198	0.672003
TBCK	0.000234286	0.67199
AC110285.1	0.00023433	0.671983
RNU6-1057P	0.000236051	0.671735
SLC30A8	0.000236102	0.671728
AL355303.2	0.000236404	0.671684
AC020663.2	0.000237505	0.671526
AC091212.1	0.000237849	0.671477
HNRNPA3P7	0.000237906	0.671469
AC012158.2	0.000241275	0.67099
HMGN1P34	0.000241275	0.67099
AQP4	0.00024168	0.670933
RPL34P19	0.000241702	0.67093
AC051619.3	0.000242563	0.670808
CTSLP3	0.000244358	0.670557
AC005841.1	0.000244843	0.670489
MIR5000	0.000245377	0.670415
TDGF1	0.000247023	0.670186
AL035078.3	0.000247338	0.670143
AC007681.1	0.000248112	0.670036
AC124944.2	0.000248968	0.669918
AL031599.1	0.000249538	0.66984
SCUBE2	0.000250348	0.669729
AC010325.2	0.000252143	0.669484
MFSD11	0.000252698	0.669409
AC008969.1	0.000254904	0.669111
SCN3A	0.000259128	0.668546
MYLK3	0.000259733	0.668466
PPP1R11P2	0.000261852	0.668186
MIR181C	0.000263245	0.668003
LIN28AP1	0.000263865	0.667922
ZNF135	0.000263972	0.667908
ATPSCKMT	0.00026664	0.667562
RNU6-876P	0.000267413	0.667462
AC093796.1	0.000267523	0.667447
RNA5SP113	0.000268465	0.667326
AL158071.2	0.000268784	0.667285
AC104596.1	0.000269398	0.667206
MIR4326	0.000269665	0.667172
PGAM4P1	0.000270875	0.667017
AC119677.1	0.000271224	0.666973
HEMK1	0.000273675	0.666661
WARS2-AS1	0.000273837	0.666641
AC131009.1	0.000274146	0.666602
AC094085.1	0.000274756	0.666525
AC145207.2	0.00027496	0.666499
AC072052.1	0.000275329	0.666452
EFCAB5	0.000276178	0.666346
LINC01481	0.000277708	0.666154
AP001893.2	0.00027777	0.666146
AL022069.2	0.000278408	0.666067
AC011603.2	0.000279768	0.665898
LINC01214	0.000279974	0.665872
BAIAP3	0.000281257	0.665713
TMTC2	0.000281479	0.665686
AP000424.2	0.000282829	0.665519
AC012309.2	0.000284248	0.665345
AKR1B1P1	0.000284406	0.665326
AC104574.2	0.00028456	0.665307
AC233266.1	0.00028456	0.665307
CR392039.3	0.00028456	0.665307
AL627422.1	0.000286698	0.665047
AC015849.4	0.000287217	0.664984
AC084125.2	0.00028769	0.664926
AL133215.1	0.000287812	0.664911
LGSN	0.000288747	0.664798
AL121949.2	0.000288887	0.664781
AC004834.1	0.000289711	0.664682
AL158198.2	0.000290927	0.664536
ZNF780B	0.000291199	0.664503
AC005304.3	0.000291431	0.664476
TPT1P10	0.000291909	0.664418
AC069154.1	0.000292302	0.664371
TAS2R4	0.000292677	0.664327
C1QTNF3	0.000292817	0.66431
AL121890.5	0.000292907	0.664299
AL445649.1	0.000293581	0.664219
TLR8-AS1	0.000294948	0.664056
ZNF154	0.000296106	0.663919
XIRP2	0.000296493	0.663874
AC020765.3	0.00029657	0.663865
ZNF573	0.000296795	0.663838
AC113382.2	0.000298566	0.66363
AC011816.1	0.000301128	0.663331
TMEM121	0.000301228	0.663319
AP002495.1	0.000301391	0.6633
AC022447.2	0.00030482	0.662903
ZNF208	0.000305045	0.662877
LINC02062	0.000307325	0.662615
WDR59	0.000309463	0.662372
AC112253.1	0.00030948	0.66237
AC103691.2	0.000309527	0.662364
AL080317.3	0.000309767	0.662337
SLX4IP	0.000310191	0.662289
NR1I2	0.000311449	0.662147
CACNA1I	0.000311901	0.662095
ARHGEF9-IT1	0.000311981	0.662086
AL355981.1	0.000312149	0.662067
AC012065.4	0.000312425	0.662036
C2	0.000312671	0.662009
AC008581.2	0.000313149	0.661955
AC006487.2	0.000314168	0.66184
AC015743.1	0.00031555	0.661686
AC073367.1	0.000316326	0.661599
ABCA9-AS1	0.000317722	0.661444
AC233976.1	0.000320847	0.661098
TPT1-AS1	0.000321492	0.661027
TRIM66	0.000321769	0.660996
AC116025.2	0.000323058	0.660855
AC068587.2	0.000325716	0.660565
AC006141.1	0.000327064	0.660419
RCOR2	0.000327217	0.660402
EPHA1	0.000327592	0.660362
SCN7A	0.000328535	0.66026
GPR89B	0.000328659	0.660246
LINC01572	0.000329151	0.660193
TAS2R31	0.000329243	0.660183
ARL2-SNX15	0.000330308	0.660069
AL645933.1	0.000332187	0.659868
AC013565.1	0.000333901	0.659685
AC087500.1	0.000335026	0.659565
AC112503.1	0.000335303	0.659536
MRPS10P2	0.000335502	0.659515
NARS2	0.000335897	0.659473
DNAH12	0.000336492	0.65941
AL596202.1	0.00033688	0.659369
H2AFZP2	0.000336887	0.659368
RNU6-853P	0.000338178	0.659232
AL031315.1	0.000340463	0.658993
AL117339.4	0.000340926	0.658944
MIR219A1	0.000341388	0.658896
AC111170.2	0.000342589	0.658771
AC091144.1	0.000343093	0.658718
KISS1	0.000343523	0.658674
PALLD	0.00034392	0.658633
AC012442.1	0.000345057	0.658515
AC092118.2	0.000347827	0.65823
EXT1	0.000349555	0.658052
AL118520.1	0.000353269	0.657675
MUC20-OT1	0.000353274	0.657674
AC012358.1	0.000353578	0.657643
U52112.2	0.000355706	0.657429
MYOM3	0.000357328	0.657265
AC027682.3	0.000357613	0.657237
MIR6070	0.000358203	0.657178
PDE2A	0.000359292	0.657069
IRAIN	0.000360245	0.656974
SLC11A2	0.000360716	0.656927
LINC02614	0.000361149	0.656884
CEACAM18	0.000362919	0.656709
AL356432.1	0.000363671	0.656634
STAMBPL1	0.000363704	0.656631
AC068831.4	0.000363746	0.656627
RNU6-1112P	0.00036426	0.656576
RN7SL284P	0.000365941	0.656411
AC068228.3	0.000367902	0.656218
INVS	0.000371025	0.655914
LINC02666	0.000371907	0.655829
RAB30-DT	0.000372625	0.655759
AC009495.2	0.000372667	0.655755
ACTG1P1	0.000372753	0.655747
AC013472.3	0.00037295	0.655728
CCDC183	0.000373025	0.655721
AC006427.1	0.000374529	0.655576
AL356432.2	0.000375	0.65553
HOXB-AS3	0.000375377	0.655494
AL133467.3	0.000375664	0.655467
AL512288.2	0.000376213	0.655414
AP002748.5	0.000376398	0.655396
KCNK1	0.000377781	0.655264
LINC02138	0.000377792	0.655263
HUNK	0.000379336	0.655115
IL36A	0.000380471	0.655008
AC012044.1	0.000381224	0.654936
HMGN3P1	0.00038147	0.654913
TAS2R13	0.000381565	0.654904
AKAP3	0.000382045	0.654858
AC023794.5	0.000382994	0.654769
AL136528.1	0.000383993	0.654674
TVP23C	0.000384057	0.654668
RPSAP6	0.000384227	0.654652
AC026801.2	0.000385309	0.654551
AC115284.2	0.000385993	0.654486
STRN3	0.000386155	0.654471
AC138866.1	0.000386236	0.654464
NOXRED1	0.000388061	0.654293
LINC01983	0.000390554	0.654061
AL359258.1	0.000391604	0.653964
AL592049.1	0.000391604	0.653964
AGPAT4	0.000392301	0.653899
TMEM72	0.000393964	0.653746
AL355377.1	0.000393977	0.653744
AC073530.1	0.000395955	0.653563
SDR42E1	0.000400608	0.653138
HTR3E-AS1	0.000401217	0.653083
MTCO2P29	0.00040193	0.653018
AL035530.2	0.000402045	0.653008
IGF2-AS	0.000402785	0.652941
YES1P1	0.000403421	0.652883
AL357054.3	0.000404041	0.652828
DENND5B-AS1	0.000406174	0.652636
MIR652	0.000408227	0.652452
AL049779.4	0.000409968	0.652297
TBC1D32	0.000413442	0.651989
CTIF	0.000414734	0.651875
FRMD6-AS1	0.000415656	0.651794
RPS15AP29	0.000416194	0.651746
C1GALT1P1	0.000416769	0.651696
RNU1-51P	0.000416981	0.651677
AL512329.1	0.000418489	0.651545
AL080317.2	0.000418945	0.651505
ZNF157	0.000423642	0.651097
RNU6-701P	0.00042523	0.65096
TRDV2	0.000425342	0.650951
PHBP19	0.000425968	0.650897
AC106791.1	0.000427094	0.6508
AC009533.1	0.000428272	0.650699
Z95331.1	0.000429034	0.650634
WDR92	0.000430096	0.650543
RN7SL329P	0.000430317	0.650524
TP73-AS1	0.000430461	0.650512
HNRNPA1P70	0.000432304	0.650355
RN7SL210P	0.000432667	0.650324
AP003557.1	0.000434652	0.650156
Z97832.2	0.000434701	0.650152
MBLAC1	0.000437076	0.649951
ZNF544	0.000437601	0.649907
AC136475.5	0.000437915	0.649881
ST8SIA2	0.000438355	0.649844
AC008507.1	0.000440097	0.649698
TMSB15B-AS1	0.000440992	0.649623
AC092329.4	0.000442062	0.649534
RPS23P1	0.000445089	0.649282
AC002074.1	0.000445966	0.64921
AC090907.2	0.00044732	0.649098
AC100830.3	0.000448477	0.649002
HECTD2	0.000448527	0.648998
LINC02354	0.000448644	0.648989
ODC1-DT	0.000449588	0.648911
CCAT2	0.000451652	0.648742
AC079298.2	0.000452148	0.648701
HOXB3	0.000454868	0.64848
DDX11-AS1	0.000456798	0.648323
FAAH2	0.000460812	0.647999
AC073288.2	0.000461795	0.64792
ITFG2-AS1	0.000465263	0.647643
AC138655.1	0.000472254	0.647089
RNU6-313P	0.000472936	0.647036
AL353194.1	0.000476112	0.646787
SLFNL1-AS1	0.000484266	0.646154
SH2D4B	0.000484452	0.64614
AC073957.2	0.000485725	0.646042
AL096711.1	0.000487259	0.645925
MIR1276	0.000491256	0.64562
AL138824.1	0.000493021	0.645486
OBSCN-AS1	0.000493052	0.645483
ERBB4	0.000493201	0.645472
AC018462.1	0.000495134	0.645326
MCF2L2	0.000496882	0.645194
AC110597.1	0.000497188	0.645171
AC105402.4	0.000503424	0.644704
KLKB1	0.000505803	0.644527
AC004923.4	0.000506872	0.644448
THEM4	0.00050714	0.644428
GAPDHP47	0.000508864	0.644301
LINC00377	0.00051038	0.644189
KIF4CP	0.000510831	0.644156
MIR548AY	0.000514032	0.643922
RNU7-30P	0.000514992	0.643851
LINC02033	0.000517959	0.643635
CASC8	0.000520935	0.64342
AC104958.1	0.00052323	0.643254
RPL21P32	0.00052373	0.643218
AC104389.4	0.000525169	0.643115
IQCA1L	0.000528104	0.642905
MDS2	0.000528368	0.642886
RN7SL660P	0.000528502	0.642877
LINC00229	0.000529551	0.642802
LINC00342	0.00052968	0.642793
LINC01562	0.000529893	0.642777
GAS2L2	0.000531988	0.642628
BX664615.1	0.000532379	0.642601
PRSS42P	0.000535963	0.642347
AC136443.4	0.000537498	0.642239
AC005072.1	0.000538304	0.642183
AL135818.2	0.000539855	0.642074
AC023632.2	0.000540196	0.64205
SYT14P1	0.000541182	0.641981
ZNF846	0.000546105	0.641638
RN7SL652P	0.000546515	0.64161
RF00006	0.000546718	0.641596
RN7SL560P	0.000549606	0.641396
EME2	0.000552334	0.641208
AC008443.7	0.000554892	0.641033
AP001999.2	0.000555809	0.64097
ULK4	0.000556528	0.640921
MIR5190	0.000556626	0.640914
AC021739.3	0.000558261	0.640803
POLN	0.000558276	0.640802
AC104662.1	0.000561835	0.64056
AL031728.1	0.000562715	0.640501
AC004477.2	0.000564443	0.640384
SMIM33	0.000565541	0.64031
RPAP2	0.000566049	0.640276
RRS1-AS1	0.000567224	0.640197
AP002981.1	0.000569276	0.64006
ADAMTS19	0.000571144	0.639935
PAWR	0.000571331	0.639922
AC091231.1	0.000572454	0.639848
GAPLINC	0.00057248	0.639846
PSMA6P4	0.000573232	0.639796
AC022469.1	0.000573589	0.639772
AK3P3	0.00057491	0.639684
AL161909.1	0.000576227	0.639597
FIRRE	0.000576451	0.639582
ADAMTS19-AS1	0.000577042	0.639543
HM13-IT1	0.00058091	0.639288
AC090912.2	0.000581627	0.639241
RNU6-719P	0.000584712	0.639039
HEATR3	0.000585214	0.639006
AP000943.1	0.000585696	0.638975
AL022322.1	0.000587034	0.638887
AC009061.2	0.000588384	0.638799
WDR86-AS1	0.000589587	0.638721
AC007922.4	0.000595378	0.638347
SLC25A25-AS1	0.000595633	0.638331
SLC25A27	0.000598472	0.638148
LINC01591	0.00059957	0.638078
ZNF385C	0.000600527	0.638017
LINC01091	0.000603529	0.637826
AC008758.4	0.000603973	0.637797
AC083798.2	0.000606985	0.637606
AC098588.2	0.000608075	0.637537
Z68871.1	0.000608981	0.63748
AOPEP	0.000609863	0.637425
AC006296.1	0.000612622	0.637251
AC079298.3	0.000616442	0.637012
AC084198.2	0.000616593	0.637002
MEG3	0.000616746	0.636993
AC106820.6	0.000620794	0.636741
IGHVIII-76-1	0.000621595	0.636691
AC245427.2	0.000622071	0.636662
RN7SL745P	0.000622454	0.636638
AC013268.3	0.000623034	0.636602
TMEM275	0.00062305	0.636601
LINC00638	0.000627902	0.636302
AL592166.1	0.000628512	0.636264
ZNF101P2	0.000636117	0.6358
ZNF732	0.000638268	0.635669
AC090286.2	0.000639775	0.635578
RNU6-213P	0.000640855	0.635513
AC009065.5	0.000641449	0.635477
AC108067.1	0.000646186	0.635192
AC073594.1	0.000646684	0.635162
RF00090	0.000649251	0.635009
C12orf81	0.000651698	0.634863
AL513534.1	0.000652674	0.634805
AC024619.3	0.000653392	0.634762
AP000942.4	0.000653556	0.634753
AC087280.2	0.000656393	0.634584
AL135838.1	0.000656838	0.634558
RNU6-1283P	0.00065944	0.634405
COA1	0.000661724	0.63427
RPL7P7	0.000662435	0.634229
PTOV1-AS1	0.000662697	0.634213
TMEM30CP	0.000663559	0.634163
SYDE1	0.000665529	0.634047
AC090945.1	0.000669071	0.633841
AC068870.3	0.000675684	0.633458
AC104024.3	0.000678315	0.633306
RN7SL117P	0.000678672	0.633286
MIR1343	0.000682827	0.633048
AL662907.3	0.000682877	0.633045
GALT	0.000683341	0.633018
AC020663.4	0.000687684	0.632771
LAMA5	0.000690012	0.632639
RN7SL144P	0.000699779	0.632089
RN7SL251P	0.00070034	0.632058
KIAA1958	0.00070074	0.632035
AC008751.2	0.000702743	0.631924
LIPE-AS1	0.000704815	0.631808
AP003557.2	0.000706854	0.631695
AC068491.3	0.000709095	0.631571
MAGEA11	0.000709324	0.631558
AL445222.1	0.000710603	0.631488
AL390856.1	0.000711006	0.631465
AL139241.1	0.000711528	0.631437
KIAA1328	0.000713401	0.631333
AP002967.1	0.000714578	0.631269
RPS14P4	0.000715296	0.631229
AL583722.4	0.000715902	0.631196
MIR5692C2	0.000716577	0.631159
N4BP2	0.000717138	0.631128
LINC02145	0.000717356	0.631116
SEC22A	0.000719111	0.63102
GLUD1P2	0.000720859	0.630925
AC107959.1	0.000721609	0.630884
FAM163B	0.000723652	0.630773
LAMC3	0.000724049	0.630751
RPL36AP40	0.000725807	0.630656
AC104763.1	0.000727331	0.630573
AC092683.1	0.000730303	0.630413
AC104532.2	0.000730921	0.630379
AC009948.1	0.000732564	0.630291
AC245884.8	0.000735863	0.630114
DOP1A	0.000736688	0.63007
AC018992.1	0.000736982	0.630054
THEM5	0.00073712	0.630047
RN7SL48P	0.000739934	0.629896
CEP295NL	0.000741077	0.629835
FNTB	0.000746039	0.629572
GPD1	0.000747897	0.629474
FAM25E	0.000749252	0.629402
AL591034.2	0.000749493	0.62939
AC104996.2	0.000752233	0.629245
PKIA-AS1	0.000753857	0.62916
AC112504.1	0.000757198	0.628985
CCDC26	0.000758967	0.628893
AC008443.1	0.000759947	0.628842
RF00045	0.0007604	0.628818
AC016710.1	0.000761735	0.628749
ALS2CL	0.000761934	0.628738
AC116337.3	0.00076307	0.628679
NRADDP	0.000765296	0.628564
ATP5F1AP3	0.000766338	0.62851
TEKT2	0.00076678	0.628487
AC120053.1	0.000767033	0.628474
AC025442.2	0.000767648	0.628442
AGAP11	0.00076849	0.628399
GTF2IP5	0.000770512	0.628294
SAP18P3	0.000776268	0.627999
GMDS-DT	0.000777488	0.627937
ANKRD36B	0.000777767	0.627923
HMX1	0.000780414	0.627788
AL451127.2	0.000783268	0.627642
UBE3D	0.000784559	0.627577
AC105052.5	0.000784829	0.627563
AC109583.3	0.000785233	0.627543
AL121890.4	0.000789868	0.627309
HDHD5-AS1	0.000790289	0.627288
LINC00106	0.00079405	0.627098
RNU4ATAC18P	0.000795321	0.627035
AC009315.1	0.000798959	0.626853
MIR378G	0.000801727	0.626715
ITGB1BP2	0.000803213	0.626641
AC015804.1	0.000805762	0.626515
LINC01301	0.000812164	0.626199
AC012533.1	0.00081376	0.62612
WDR35	0.000817395	0.625942
GREB1L	0.000817773	0.625924
RN7SKP115	0.000820905	0.625771
AC079331.2	0.000821834	0.625726
TMEM198B	0.000825012	0.625571
TECTA	0.000825053	0.625569
AC027097.1	0.000828238	0.625415
AP000894.3	0.000831913	0.625237
FAM183A	0.000833305	0.62517
AL355834.2	0.000837428	0.624972
Z98043.1	0.000840881	0.624807
TRAV15	0.00084314	0.6247
AC080188.2	0.000843177	0.624698
AC073842.2	0.000843743	0.624671
SLC35E2A	0.000845863	0.62457
GEMIN8	0.000846891	0.624521
AC024619.1	0.000847442	0.624495
AP4S1	0.000848194	0.62446
LINC01844	0.000849833	0.624382
RNF215	0.000855393	0.62412
SLC23A1	0.000855422	0.624118
PRELID3BP4	0.000858637	0.623967
KRT18P61	0.000863379	0.623746
MIR202HG	0.000863819	0.623725
AC093821.1	0.000865479	0.623648
AC093585.1	0.000867011	0.623576
ZNF37BP	0.000868362	0.623514
RNU6-379P	0.000870315	0.623423
AC140725.1	0.000872053	0.623343
PLGLB1	0.000873478	0.623277
AL133297.1	0.000873552	0.623273
RNU6-667P	0.000879652	0.622993
AL158151.4	0.000880376	0.622959
NHEJ1	0.000884291	0.62278
ZNF418	0.000885334	0.622732
AC005944.1	0.000886007	0.622702
LINC01184	0.000901018	0.622022
AC105749.1	0.000901072	0.622019
ATP13A4	0.000901357	0.622006
CNIH3	0.000904603	0.621861
THBS3	0.000907507	0.621731
LINC01342	0.00091071	0.621588
KLHL25	0.000911749	0.621542
AL109811.1	0.000915207	0.621388
AL391261.4	0.000917071	0.621305
AL009178.2	0.000917302	0.621295
ZNF808	0.000918333	0.621249
AC010542.2	0.000919164	0.621213
OR13C9	0.000919294	0.621207
TNPO1P1	0.000919329	0.621205
KCTD21-AS1	0.000922668	0.621058
AP006621.2	0.000924916	0.620959
AC012254.1	0.000925033	0.620954
KRT17P6	0.000928013	0.620823
AK4P2	0.000931381	0.620676
WDR86	0.000933241	0.620595
SKAP1	0.000933548	0.620581
AL132780.5	0.000934623	0.620534
AC010745.5	0.000939298	0.620331
MIR4460	0.000939341	0.620329
LRCH3	0.000940306	0.620287
AL049536.1	0.00094774	0.619966
RN7SL775P	0.000948824	0.61992
AL133410.1	0.000953208	0.619731
AC073210.3	0.00095518	0.619647
CCDC17	0.00095683	0.619576
PPIEL	0.000957456	0.61955
AL035427.2	0.000961578	0.619374
MIR606	0.000962065	0.619354
AL353706.1	0.000967222	0.619135
KDR	0.000971847	0.61894
RNF165	0.000974158	0.618842
AC000120.1	0.000978623	0.618655
POT1-AS1	0.000978895	0.618644
CCDC114	0.000987875	0.618269
LINC01134	0.000987912	0.618268
GAPDHP27	0.000989725	0.618192
AC007224.2	0.000995735	0.617944
CYP2D8P	0.000997779	0.61786
TAS2R50	0.00099863	0.617825
AC118344.1	0.00100217	0.617679
RAB40A	0.00100522	0.617554
LINC00235	0.00100775	0.617451
XIST	0.00100902	0.617399
C19orf33	0.00100996	0.617361
RNU6-625P	0.00101251	0.617257
PKNOX1	0.00101683	0.617081
SYCP3	0.00101762	0.617049
LINC00954	0.00102037	0.616938
LINC02255	0.00102089	0.616917
TRIM73	0.00102256	0.61685
ASMTL-AS1	0.00102289	0.616837
AC012629.4	0.00102691	0.616675
AC037198.2	0.00102798	0.616632
AC005674.2	0.00103178	0.616479
RAD50	0.00103314	0.616425
GTF2IRD1P1	0.00104174	0.616083
VWCE	0.00104784	0.615841
AC109449.1	0.00104947	0.615777
RIBC1	0.00105628	0.615509
RN7SKP210	0.00105707	0.615478
EPM2A	0.00105938	0.615388
HDAC2-AS2	0.00106133	0.615311
LINC01140	0.00106351	0.615227
PMS2	0.001065	0.615168
DDX11L1	0.00106532	0.615156
IL11RA	0.00106772	0.615063
AL137793.1	0.00107252	0.614877
SGK2	0.00107434	0.614806
AC092944.1	0.0010763	0.614731
AC105424.1	0.00107933	0.614614
ZNF474	0.00108121	0.614542
AC092058.1	0.00108357	0.614451
LINC00861	0.00108414	0.614429
ATP4A	0.00108457	0.614413
AL354950.1	0.00108663	0.614334
AL162274.2	0.00108893	0.614246
AL513550.1	0.00108919	0.614236
CAP2P1	0.00109698	0.613939
MIR548U	0.00109829	0.61389
FLT1	0.0010987	0.613874
IFNL4P1	0.00109872	0.613873
TMEM256P2	0.00109872	0.613873
ZNF502	0.00110093	0.61379
SUZ12P1	0.0011022	0.613742
TMEM235	0.00110225	0.61374
NIPAL1	0.00110311	0.613707
SLC2A1-AS1	0.00110602	0.613598
MIR6870	0.001107	0.613561
AC139103.1	0.00110793	0.613526
FSCN2	0.00111038	0.613433
PRSS50	0.00111096	0.613412
THSD8	0.00111329	0.613324
RBM41	0.00111382	0.613305
SLC4A8	0.00111905	0.613109
RFX3	0.0011217	0.61301
RNU7-125P	0.00112491	0.612891
MIR3135A	0.00112972	0.612712
N6AMT1	0.00113005	0.6127
AC231533.2	0.00113027	0.612692
AC137894.1	0.00113112	0.612661
AC010547.2	0.0011328	0.612599
CYP11A1	0.00113537	0.612504
RN7SKP97	0.0011387	0.612381
FRG1-DT	0.00113976	0.612343
AC008014.1	0.0011398	0.612341
GALNT15	0.00114165	0.612273
AP002812.5	0.00114218	0.612254
AC068790.2	0.00114363	0.612201
FAM161B	0.0011443	0.612176
AC016999.2	0.00114847	0.612024
AC020917.3	0.00115466	0.611798
AC092135.1	0.00115576	0.611759
AC015674.1	0.00116483	0.611431
NSUN5P2	0.00116771	0.611327
AL117336.2	0.00116939	0.611266
AC145422.1	0.0011711	0.611205
TRIM16	0.00117193	0.611175
AC091965.1	0.00117522	0.611058
AL023653.1	0.00117574	0.611039
AC023490.2	0.0011814	0.610837
LINC00922	0.00118347	0.610763
AC068025.2	0.00118415	0.610739
AC025576.3	0.00118542	0.610694
MIR3677	0.00118763	0.610616
CYMP-AS1	0.00118784	0.610608
SLC16A1-AS1	0.00119076	0.610505
HMGB1P44	0.00119083	0.610502
XKR6	0.00119132	0.610485
DNHD1	0.0011921	0.610458
AC018693.2	0.00119331	0.610415
FGD5P1	0.00120266	0.610086
AC010487.1	0.00120359	0.610053
AGAP4	0.00120676	0.609942
AC006213.2	0.00121003	0.609828
AC098859.2	0.00121607	0.609618
AL592148.2	0.00122045	0.609466
AC092745.1	0.00122203	0.609411
RNU6-1152P	0.00122222	0.609405
AC110285.2	0.00122692	0.609243
AC026740.1	0.00122866	0.609183
AL121583.1	0.00123007	0.609134
AC114482.1	0.00123055	0.609117
LINC02245	0.00123565	0.608942
AC012254.5	0.00123694	0.608899
LINC02341	0.00123746	0.608881
GOLGA2P11	0.00124189	0.608729
AC019205.1	0.00124268	0.608702
FAM86FP	0.00125403	0.608317
CTAGE9	0.00125578	0.608258
PPIAP41	0.00125782	0.608189
AC004967.2	0.00126095	0.608084
AC092902.6	0.00126393	0.607983
AC010542.3	0.00127414	0.607641
AC068020.1	0.00127615	0.607575
AC135506.1	0.00128665	0.607226
AC092745.2	0.00128976	0.607123
LINC00852	0.00128986	0.60712
PPIAP67	0.00129213	0.607045
AL162458.1	0.00129366	0.606995
AC004943.1	0.00130152	0.606736
AC090772.3	0.00130365	0.606667
AOAH-IT1	0.00131081	0.606433
AC021752.1	0.00131355	0.606344
AL158055.1	0.00132083	0.606108
SNRPGP17	0.00132373	0.606014
MIR4735	0.00132462	0.605985
HDAC4	0.00132946	0.605829
AC104581.1	0.00133144	0.605766
SLC32A1	0.00133307	0.605714
AC010329.5	0.00134147	0.605445
AC010168.2	0.001346	0.6053
TUBBP10	0.00134611	0.605297
SLC38A8	0.00134943	0.605191
SNX32	0.00135359	0.605059
LINC00486	0.00135767	0.60493
RN7SL655P	0.001363	0.604762
AZGP1	0.00136341	0.604749
AP000221.1	0.00136462	0.604711
POLR3DP1	0.0013648	0.604706
PRPF40B	0.00136922	0.604567
AC010132.4	0.00136943	0.60456
AC007610.4	0.00136978	0.604549
TAS2R5	0.00136978	0.604549
RNU6-910P	0.00137217	0.604474
HERC4	0.00137758	0.604305
RNU6-817P	0.00137789	0.604295
VDAC2P2	0.00138009	0.604227
TTLL10	0.00138313	0.604132
MIR320D1	0.0013843	0.604096
CSPP1	0.00138672	0.604021
RN7SL394P	0.00138712	0.604008
GTF2IP6	0.00138929	0.603941
AC025682.1	0.00139795	0.603674
TULP1	0.00140196	0.60355
ZNF334	0.00140364	0.603499
PPP5D1	0.00140442	0.603475
AC006512.1	0.00141013	0.6033
AC004941.1	0.00142688	0.60279
PAK3	0.00143245	0.602622
IRAK1BP1	0.00143563	0.602526
[truncated: 51,994 more rows]

## Sheet: AC116351.1
.id	p.value	R
AC116351.1	4.59478e-178	1
C18orf54	2.42036e-07	0.832713
TICRR	8.93167e-07	0.810715
AC091057.1	2.66787e-06	0.789812
NEMP1	3.39232e-06	0.784886
AC022306.2	3.5137e-06	0.784154
ZSCAN30	4.94821e-06	0.776881
AC005034.4	5.4235e-06	0.774886
ASB13	6.17016e-06	0.772046
LSM11	7.02933e-06	0.769135
CEP57L1	8.18008e-06	0.765696
MBLAC2	9.90607e-06	0.761269
MRPS6	1.13423e-05	0.758082
MCM3AP-AS1	1.49811e-05	0.751376
AL162731.1	2.17938e-05	0.742003
AGPAT5	2.28811e-05	0.740756
RPS3AP46	2.69599e-05	0.736503
SUV39H2	2.82292e-05	0.735295
SLC29A1	2.88912e-05	0.734684
ENPP7P14	2.97224e-05	0.733935
MAFTRR	3.21187e-05	0.731873
VKORC1L1	3.23637e-05	0.73167
IGHV3-54	3.39506e-05	0.730387
HNRNPA1P16	3.46878e-05	0.729808
AC007663.4	3.612e-05	0.728715
PITPNM2	3.62199e-05	0.728641
MRTFB	3.6736e-05	0.728257
PUS10	4.06833e-05	0.725472
RN7SKP5	4.34455e-05	0.723661
ADGRB2	4.67469e-05	0.721626
RFX8	5.05135e-05	0.719454
XRCC2	5.05984e-05	0.719406
AC090241.3	5.35635e-05	0.717797
AC069277.2	5.37559e-05	0.717695
ZNF616	5.46445e-05	0.717229
CBX5P1	5.59218e-05	0.716572
MIR3619	5.87484e-05	0.715162
MIR4304	5.91161e-05	0.714983
DIS3L	5.97364e-05	0.714683
KIF24	6.02466e-05	0.714439
AL360270.2	6.21542e-05	0.713541
LINC01971	6.47704e-05	0.712348
AC009113.1	6.93761e-05	0.710347
AC005586.2	7.03146e-05	0.709954
NNT-AS1	7.56331e-05	0.707809
AC008885.1	7.60592e-05	0.707643
WDR3	7.77091e-05	0.707008
AF241728.2	7.8572e-05	0.70668
MCM8	7.88395e-05	0.706579
FBXL19-AS1	8.5979e-05	0.703992
NEMP2	8.78229e-05	0.703354
RNF170	8.9806e-05	0.702681
AP001092.1	8.99192e-05	0.702643
RCC2P6	9.11475e-05	0.702234
MIR3126	9.38928e-05	0.701335
AL450063.1	9.41856e-05	0.701241
KIF18B	9.42188e-05	0.70123
DPY19L2P2	0.000101307	0.69902
LINC01355	0.000112969	0.695663
NKD2	0.000116585	0.694684
LINC02312	0.000116779	0.694632
MIR3157	0.000121987	0.69327
LIX1L	0.000122578	0.693118
AC132153.1	0.000125082	0.692484
AC091178.2	0.000130464	0.691158
CPB2-AS1	0.000132373	0.690699
JADE3	0.00013272	0.690616
FKTN	0.00013363	0.6904
BLOC1S5	0.000134846	0.690113
IGHV3-22	0.000135761	0.689898
RSBN1L	0.000141649	0.688548
IGHV7-34-1	0.000145094	0.687781
AC006504.7	0.000146088	0.687562
FGFR3	0.000146446	0.687484
AJ239328.1	0.000148291	0.687083
SMARCAL1	0.000148354	0.687069
C21orf62-AS1	0.000152974	0.686083
ZNF197-AS1	0.000161429	0.684346
AC093152.1	0.000161763	0.684279
MSH5	0.000167453	0.683156
STAMBP	0.000168987	0.682859
VN1R108P	0.000171021	0.682468
AL359736.2	0.000173127	0.682069
MIR6767	0.000174246	0.681858
IGHV3-33-2	0.000175863	0.681556
AC093525.6	0.000175971	0.681536
DUSP19	0.000177665	0.681221
GINS1	0.000178359	0.681094
ZEB1-AS1	0.000187876	0.679382
ZNF337-AS1	0.000193241	0.678451
AC004522.1	0.000196076	0.677968
RN7SL583P	0.000196076	0.677968
FBXL4	0.000198512	0.677558
AC008966.1	0.000198747	0.677518
RABEP1	0.000202801	0.676846
KCNC4	0.00020389	0.676667
RPL23AP97	0.000204366	0.676589
VSX1	0.000218513	0.674346
PEX5L	0.000221693	0.673859
AL157912.1	0.000222616	0.673719
SCG5	0.000223395	0.673601
ACTG1P22	0.00022411	0.673493
MIRLET7BHG	0.000233588	0.672091
AC020658.3	0.000254641	0.669146
AC069222.1	0.000256519	0.668894
RPGRIP1L	0.000256551	0.66889
DNTT	0.000256954	0.668836
MIR613	0.000257309	0.668788
REV1	0.000258496	0.66863
TTC23	0.00025871	0.668602
RNU6-153P	0.000262453	0.668107
BCL11A	0.000264578	0.667829
AC122710.2	0.000279231	0.665964
DAB2IP	0.000281762	0.665651
GOLPH3L	0.000282297	0.665585
IGHVII-43-1	0.000289025	0.664765
AC107302.1	0.000291031	0.664523
RDM1P5	0.000291042	0.664522
AC004943.2	0.000295182	0.664029
LINC02595	0.000299976	0.663465
NOTCH3	0.000302762	0.663141
TTF2	0.000314983	0.661749
LINC01056	0.000317902	0.661424
IGHV7-40	0.000321151	0.661064
FKBP4P1	0.000324465	0.660701
IGHV7-27	0.000327945	0.660323
DDR1	0.000338741	0.659173
AL357060.1	0.000361122	0.656887
LRRC38	0.000362704	0.65673
FAM120C	0.000363855	0.656616
RNA5SP229	0.000365033	0.6565
EME1	0.000370974	0.655919
STXBP1	0.000379834	0.655068
AL627230.1	0.000382556	0.65481
AC007497.1	0.000391088	0.654011
AL450998.2	0.000391501	0.653973
RNA5-8SN1	0.000391841	0.653942
GPR19	0.000402569	0.65296
LINC01550	0.000406484	0.652608
CMTM7	0.000407029	0.652559
DSCAML1	0.000413875	0.651951
ATP1A1-AS1	0.00041738	0.651642
AL023806.4	0.000422547	0.651192
SMPD3	0.000424947	0.650985
AC009977.1	0.000428057	0.650717
ZNF248	0.000431663	0.650409
IGHV3-42	0.000432727	0.650319
AC073415.1	0.000436548	0.649996
RNA5SP484	0.000444685	0.649316
AC069277.1	0.000457053	0.648302
TUBG2	0.000457587	0.648259
LINC00629	0.000478194	0.646624
ZMYM1	0.000481973	0.646331
AL365440.2	0.00048676	0.645963
PIGN	0.000491542	0.645598
AC017104.4	0.000492817	0.645501
AC099521.2	0.000496922	0.645191
NSD2	0.000500686	0.644908
ZFP62	0.000504529	0.644622
PKP4	0.000506472	0.644478
AL161457.2	0.000507807	0.644379
AC117402.1	0.000511314	0.644121
AL354696.2	0.000515153	0.64384
GPR162	0.000516219	0.643762
LCT	0.000519858	0.643498
CCDC34	0.000522292	0.643322
IGHVIII-51-1	0.000544508	0.641749
AURKB	0.00054532	0.641693
AC091132.4	0.000546585	0.641605
ATP6AP1L	0.000548724	0.641457
FP236383.2	0.000557319	0.640867
KRT18P18	0.000567794	0.640159
CBX1P2	0.000568793	0.640092
XYLB	0.000574908	0.639685
ZNF181	0.000577701	0.6395
ASXL2	0.000579355	0.639391
LINC00173	0.000582961	0.639154
MYO7B	0.000586178	0.638943
ACP6	0.000595327	0.63835
DARS2	0.000596973	0.638245
AC006207.1	0.00059703	0.638241
APPBP2	0.000597559	0.638207
L3HYPDH	0.000598725	0.638132
LINC00634	0.000606859	0.637614
ZNF512	0.000612132	0.637282
RPSAP63	0.000618677	0.636873
MTRNR2L1	0.000621181	0.636717
RN7SKP268	0.000621314	0.636709
R3HDM1	0.000625652	0.63644
AC006504.3	0.000633075	0.635985
LINC01238	0.000633338	0.635969
POLH	0.000634439	0.635902
RNF219	0.000643204	0.635371
LUNAR1	0.000643453	0.635356
RAD54L	0.000645344	0.635243
BRCA1	0.000648511	0.635053
AC069257.2	0.000650098	0.634958
MOSMO	0.000671749	0.633685
TBCCD1	0.00067308	0.633608
AC090360.1	0.000674104	0.633549
ZNF232	0.000679363	0.633246
EIF3EP1	0.000684916	0.632929
MIR378F	0.000693348	0.63245
AGL	0.00069958	0.6321
FP671120.7	0.000706748	0.631701
RNU4-13P	0.000706748	0.631701
SCAI	0.000711637	0.63143
AF233439.1	0.000713023	0.631354
NCOR1P2	0.000718613	0.631047
AC125603.4	0.000719428	0.631003
MRPS14	0.000723734	0.630768
TRIP13	0.000724685	0.630717
ATF1	0.000741931	0.62979
CBX5	0.000747377	0.629501
GCSH	0.000749925	0.629367
IGHVII-26-2	0.000753608	0.629173
RN7SKP86	0.000759721	0.628853
ASF1B	0.00078844	0.627381
TRMT1L	0.00078888	0.627359
DRP2	0.000802685	0.626667
IGHVII-28-1	0.000811169	0.626248
OR10K2	0.000811599	0.626227
LINC01749	0.000814203	0.626099
MIR4653	0.000816378	0.625992
AC103563.7	0.000833163	0.625177
IGHV1-69	0.000836103	0.625036
PPP2R3B	0.000836115	0.625035
CENPQ	0.000840442	0.624828
MCM6	0.000841254	0.62479
CKMT2-AS1	0.000845514	0.624587
AC090058.1	0.00085549	0.624115
PRMT6	0.000857528	0.624019
GPR135	0.000860853	0.623864
SZT2-AS1	0.000872611	0.623317
CSTF3	0.000875311	0.623192
SCOC-AS1	0.000882809	0.622848
CCNF	0.000891097	0.62247
SP2-AS1	0.00089159	0.622448
AC026362.2	0.000893168	0.622376
ADAM33	0.000893411	0.622365
AC091057.4	0.000894814	0.622302
AP005482.1	0.000896222	0.622238
AC008434.1	0.00090506	0.62184
LINC02291	0.000905657	0.621814
RPL21P90	0.000913845	0.621448
AC019080.5	0.000915425	0.621378
UHRF1	0.000925503	0.620933
MYH10	0.000936445	0.620455
GOLGA2P2Y	0.000948791	0.619921
DPY19L4	0.000949481	0.619891
MYLK-AS1	0.000950805	0.619834
SMAD4	0.000965207	0.61922
HSDL1	0.000966591	0.619162
RMI1	0.000972838	0.618898
GTSE1	0.000974114	0.618844
COX15	0.000978502	0.61866
AC134878.2	0.000989382	0.618207
AL450327.1	0.000992657	0.618071
TMCC1-AS1	0.000996328	0.617919
RNA5SP379	0.00100867	0.617413
MRRF	0.00101699	0.617075
AP005482.2	0.00102691	0.616675
PHF7	0.00102752	0.61665
AC068276.1	0.00103364	0.616405
AC091057.5	0.00104849	0.615816
OR10T1P	0.00105305	0.615636
FAM57B	0.0010552	0.615552
C21orf58	0.00105742	0.615464
SEM1P1	0.00107173	0.614907
PLA2R1	0.00108271	0.614484
PDK3	0.00109204	0.614127
GEMIN6	0.00110699	0.613561
AC010332.1	0.00111753	0.613166
KLHL23	0.00112521	0.61288
BRD8	0.00112884	0.612745
FAM111A	0.0011361	0.612477
AC000065.2	0.00113776	0.612416
MIR95	0.00114649	0.612096
RN7SKP198	0.00115452	0.611804
ZNF670-ZNF695	0.00115745	0.611697
AC016168.2	0.00116104	0.611567
AL139351.1	0.00116744	0.611337
ZNF550	0.00117126	0.611199
AC019080.1	0.00117574	0.611039
IGHVII-40-1	0.0011767	0.611004
CENPI	0.00118581	0.61068
RNU105B	0.00118742	0.610623
AC010623.1	0.00119971	0.610189
THRAP3	0.00120433	0.610027
POLR1B	0.00121447	0.609673
SLC6A20	0.00122265	0.60939
PXYLP1	0.00122684	0.609245
AL357079.1	0.0012308	0.609109
AC243562.2	0.00123605	0.608929
ZBED8	0.00123644	0.608915
AFF1	0.00123756	0.608877
AC096708.3	0.00123838	0.608849
ADSSL1	0.00124417	0.608652
RMND5B	0.0012454	0.60861
AC109454.4	0.00125136	0.608407
TXNRD3	0.0012593	0.608139
IGHVII-33-1	0.00127291	0.607683
DHX33	0.00127598	0.60758
ZNF519	0.00128009	0.607443
WDHD1	0.00128285	0.607352
AC246817.2	0.00128769	0.607192
ARHGAP11A	0.00128933	0.607137
PLEKHA8P1	0.00128996	0.607117
GTF2H2C	0.00129079	0.607089
AC008659.1	0.00129877	0.606826
PPIAP66	0.00132022	0.606128
NR2C2	0.00132238	0.606058
SLC35B4	0.00134609	0.605297
TRIM9	0.00135453	0.605029
GJB6	0.00136073	0.604834
AL365295.1	0.0013639	0.604734
AL592148.3	0.00137092	0.604513
PTCD2	0.00137336	0.604437
OR4N3P	0.00138478	0.604081
AC011447.4	0.00138637	0.604032
AC093591.2	0.00139443	0.603782
AC084757.2	0.00140595	0.603428
GYG2	0.00142078	0.602975
BACH1-IT3	0.00143248	0.602621
FAM185A	0.00143438	0.602564
AC068587.4	0.00143593	0.602517
ZNF146	0.00143902	0.602424
DTWD1	0.00144215	0.60233
RNU2-68P	0.00145316	0.602001
ATIC	0.00146016	0.601793
FO393409.1	0.00146147	0.601754
LINC01225	0.00146528	0.601641
AL049833.3	0.00146996	0.601503
AC093297.2	0.00148299	0.60112
ZC3H8	0.00148626	0.601024
AC093390.2	0.0014892	0.600938
SKP2	0.00149588	0.600744
AC079385.1	0.00151563	0.600173
GLRXP3	0.00152843	0.599806
AC103563.9	0.00155219	0.599133
TRBV5-3	0.00155656	0.59901
AC069499.1	0.00156673	0.598725
ZRANB2-AS2	0.00156938	0.598651
ZNF423	0.00157044	0.598621
RPS3AP34	0.0015707	0.598614
AC090518.1	0.00157324	0.598544
ZNF665	0.00158768	0.598143
AP003108.5	0.00158817	0.59813
AC099066.3	0.0015936	0.59798
AC137630.4	0.00159608	0.597912
GAPDHP35	0.00160158	0.597761
PIGFP1	0.00161089	0.597506
OSGEPL1	0.00164512	0.596581
RACGAP1	0.00165349	0.596357
RNA5SP64	0.00165368	0.596352
MIR3942	0.0016615	0.596144
THEM7P	0.00167013	0.595915
AL603839.3	0.00167034	0.595909
AC091516.1	0.00167652	0.595746
IGHV3-32	0.00167676	0.59574
AC105760.1	0.00167791	0.59571
SSBP2	0.00168873	0.595425
MIR99A	0.00170844	0.594912
INTS7	0.00170985	0.594875
ZNF781	0.00171559	0.594727
DEPDC1B	0.00171686	0.594694
DHRS4-AS1	0.00171936	0.594629
AC079841.2	0.00171965	0.594622
AC105233.5	0.00172071	0.594594
TADA2A	0.00172859	0.594392
AC084018.3	0.00173412	0.59425
KRT18P33	0.00174215	0.594045
AC026436.1	0.00174395	0.593999
TSEN2	0.00175298	0.593769
EEF1AKMT3	0.00178475	0.592969
IGHVII-30-21	0.00181192	0.592295
RN7SKP126	0.00181407	0.592242
AJ011931.1	0.00181809	0.592143
ARPC3P2	0.00183541	0.591719
KIAA0586	0.00184469	0.591493
LCMT1-AS1	0.00184532	0.591478
AL354712.1	0.00184535	0.591477
CMC1	0.00185886	0.59115
BBS10	0.00186328	0.591044
AC093642.2	0.00187408	0.590784
ZNF283	0.00188663	0.590484
FSIP2-AS1	0.0018878	0.590456
CR769775.2	0.00189476	0.590291
RPL23AP20	0.00190118	0.590139
DET1	0.00190423	0.590067
C10orf25	0.00190493	0.59005
PIGF	0.00192162	0.589657
IGHV3-35	0.00192206	0.589647
AC000068.3	0.00192291	0.589627
GALK2	0.00193347	0.58938
AC063944.2	0.00196145	0.588731
KDM4A-AS1	0.00198735	0.588138
AC093157.1	0.00200692	0.587694
PKN3	0.0020124	0.58757
AC012073.1	0.00201379	0.587539
ZNF322	0.0020279	0.587222
ACYP1	0.00202835	0.587212
AC009159.4	0.00203286	0.587111
RAB5CP2	0.00204242	0.586898
ZNF559	0.00204246	0.586897
AC009236.1	0.00204546	0.58683
RNASEH2B	0.00204863	0.586759
B3GNT10	0.00204939	0.586742
LINC01226	0.00205277	0.586668
AL355480.1	0.00205496	0.586619
AL159169.3	0.00205547	0.586608
AL157770.1	0.0020742	0.586195
FP671120.4	0.00207682	0.586137
AC096664.2	0.00208099	0.586046
DAND5	0.00208565	0.585944
SYT7	0.00209546	0.58573
MID1IP1-AS1	0.00209773	0.58568
LINC02210	0.00212353	0.585122
FAM86B1	0.00212906	0.585003
CCDC15	0.0021405	0.584758
AKAP12	0.00214341	0.584695
MIR6783	0.00217818	0.583958
C1orf109	0.00218226	0.583872
CORO6	0.00219246	0.583658
FAM86EP	0.00219447	0.583616
ZNF137P	0.00220042	0.583491
AC012213.3	0.00221557	0.583176
LINC01237	0.00222994	0.582878
AC011447.6	0.00223659	0.582741
AC108729.1	0.00224157	0.582639
LINC00471	0.00224472	0.582574
TMA16	0.0022464	0.582539
MAT2A	0.002249	0.582486
AC021483.2	0.00228606	0.581731
FBXO22	0.00228609	0.581731
TRAF3IP1	0.00229094	0.581633
CETN3	0.00229904	0.58147
IGHVIII-26-1	0.00230049	0.58144
OCRL	0.00230635	0.581323
NEK4	0.00232606	0.580929
GLCCI1	0.00233213	0.580808
MTHFD1	0.00233574	0.580736
PCBP3	0.00233979	0.580656
ANKS6	0.00234822	0.580489
AL355602.1	0.00234861	0.580481
NUDT6	0.0023519	0.580416
HSPA8P11	0.00235249	0.580405
TRMT5	0.00235694	0.580317
AL589765.6	0.00235745	0.580307
ZNF485	0.00238677	0.579732
LINC01560	0.00240539	0.579371
AC068756.1	0.00240659	0.579348
NF1	0.00242947	0.578907
PTPRF	0.00243644	0.578773
IGHV3-36	0.00243813	0.578741
AL591926.4	0.0024489	0.578535
GART	0.00245453	0.578428
SPDL1	0.00245644	0.578391
SOS1	0.00246593	0.578211
AL121845.3	0.00246837	0.578165
AC245595.1	0.00246989	0.578136
TMEM186	0.00248371	0.577875
ZC3H6	0.00249386	0.577684
AC099782.1	0.00249971	0.577575
AC004803.1	0.00250584	0.57746
NUDCD1	0.00250658	0.577446
FBXO48	0.00251552	0.577279
AP000711.1	0.00256239	0.576413
ARHGEF39	0.00257084	0.576258
AC009237.15	0.00259082	0.575894
CEP41	0.00259393	0.575837
RHOT1P1	0.00262025	0.575361
SNAPC3	0.00262586	0.575261
IGHV1-69-2	0.00263501	0.575096
FAM216A	0.00263707	0.57506
AC073857.1	0.00265973	0.574655
RMI2	0.00266015	0.574648
AC104447.1	0.00266026	0.574646
AC004408.1	0.00267992	0.574298
AC017104.5	0.0026835	0.574235
VIPR2	0.00268929	0.574133
ZKSCAN7	0.00273269	0.573374
ZNF566	0.00277377	0.572665
PACRGL	0.00278791	0.572423
MT-ATP8	0.00278884	0.572407
AC064807.1	0.0027923	0.572348
AL355338.1	0.00279883	0.572237
VN1R42P	0.00280275	0.57217
ZACNP1	0.00281076	0.572034
PTPN3	0.00281454	0.57197
AC021092.1	0.00281626	0.571941
CR2	0.00282943	0.571719
GPR173	0.00286244	0.571165
AC122719.2	0.00286751	0.57108
AC022018.1	0.00287615	0.570937
IFT122	0.00287724	0.570918
KIAA0753	0.00291014	0.570374
ZNF546	0.0029111	0.570358
AC145423.2	0.00292025	0.570208
LINC02050	0.00292087	0.570198
HMGN5	0.00293774	0.569922
KNOP1	0.00294131	0.569863
TCEAL3-AS1	0.00294346	0.569828
IGHVII-51-2	0.00294909	0.569737
MAGEF1	0.00297534	0.569311
OR10T2	0.00298525	0.569151
ANKRD50	0.00299372	0.569015
AC069218.1	0.00299962	0.56892
AL133520.1	0.003026	0.568499
NCL	0.00303265	0.568393
DHFR	0.00305325	0.568066
MAGI2-AS3	0.00305794	0.567992
AC090825.1	0.00306836	0.567828
ZNF670	0.00308982	0.567491
NCBP3	0.00310052	0.567324
AC112503.2	0.00310498	0.567255
IGHVII-30-1	0.0031158	0.567087
LINC00467	0.00312047	0.567014
TRBV24-1	0.00312474	0.566948
C5orf34	0.00313218	0.566833
AC209007.1	0.00313356	0.566811
AC006504.5	0.00313999	0.566712
KIFC1	0.00314125	0.566693
AC015688.4	0.00314334	0.56666
AC022137.2	0.00314334	0.56666
AC091810.1	0.00314334	0.56666
AC096633.1	0.00314334	0.56666
AC104843.2	0.00314334	0.56666
AC135068.4	0.00314334	0.56666
AL109913.1	0.00314334	0.56666
AL589743.3	0.00314334	0.56666
ANKRD20A6P	0.00314334	0.56666
AP000547.2	0.00314334	0.56666
ATP5MFP3	0.00314334	0.56666
EEF1G	0.00314334	0.56666
FAM25A	0.00314334	0.56666
LINC00328-2P	0.00314334	0.56666
MICOS10-NBL1	0.00314334	0.56666
MIR4472-2	0.00314334	0.56666
MRPS5P4	0.00314334	0.56666
PPIAP34	0.00314334	0.56666
RNU6-995P	0.00314334	0.56666
SNORA36A	0.00314334	0.56666
SUSD2P2	0.00314334	0.56666
ZFYVE9P1	0.00314334	0.56666
AC026150.2	0.0031453	0.56663
H2AFX	0.00315077	0.566546
AC017002.6	0.00315199	0.566527
GJB2	0.00317053	0.566243
TRAV38-2DV8	0.00318988	0.565947
RN7SL715P	0.00319191	0.565916
KRCC1	0.00320749	0.56568
PPP1R3E	0.00320847	0.565665
RPSAP33	0.00322819	0.565367
MAP1A	0.00323812	0.565217
FP236383.5	0.00324479	0.565117
TRBJ2-6	0.00325208	0.565008
ZNF33BP1	0.00325482	0.564967
U47924.3	0.00325509	0.564963
ANKRD46	0.00327817	0.564619
PRRT3-AS1	0.00328181	0.564565
RAB9B	0.00329136	0.564423
CD1B	0.00329493	0.56437
LINC02236	0.00330263	0.564256
TIA1	0.00330292	0.564252
AC012063.1	0.00330557	0.564212
IGHV3-30-2	0.00332349	0.563948
ZNF429	0.00333724	0.563746
RN7SKP224	0.00333926	0.563717
EGLN3	0.00334363	0.563653
AC107071.1	0.0033677	0.563302
AL442636.1	0.00338138	0.563103
CCDC138	0.00339609	0.562891
MIR924HG	0.00339894	0.562849
OLIG3	0.00341798	0.562575
PABPC1P10	0.00341985	0.562549
INTS13	0.0034204	0.562541
AC097493.2	0.00344761	0.562152
NDC1	0.00345244	0.562083
AC106858.1	0.00345625	0.562029
ABCC5	0.00346834	0.561857
AC126544.1	0.00348462	0.561626
AL451081.2	0.00349381	0.561497
RNA5SP217	0.00349945	0.561417
AC016168.1	0.00350397	0.561354
AL627230.2	0.00351392	0.561214
BTN2A2	0.00352737	0.561026
PHBP7	0.00353038	0.560984
RPL35AP18	0.00353231	0.560957
AL158206.1	0.00354086	0.560837
AC013489.3	0.00357451	0.56037
B4GALT6	0.00358634	0.560207
JPT2	0.00358958	0.560163
AL136531.1	0.00359432	0.560097
TTC33	0.00359764	0.560052
PAFAH2	0.00360545	0.559944
AC012435.2	0.00362015	0.559743
ORC2	0.00364694	0.559378
LINC00662	0.00365589	0.559256
MCM10	0.00367509	0.558996
TPX2	0.00367908	0.558942
CD1E	0.00370181	0.558637
ZNF420	0.00370563	0.558585
TNFRSF8	0.00371218	0.558498
RPA1	0.00372345	0.558347
PAX8	0.00373335	0.558215
AL390800.1	0.00373977	0.558129
AC123023.1	0.00376104	0.557847
ZNF658B	0.00376405	0.557807
RN7SL419P	0.00377417	0.557674
AC006023.2	0.00377447	0.55767
SGO1	0.00378657	0.55751
COG8	0.00378806	0.557491
AL391597.1	0.00379992	0.557335
POU3F2	0.00380434	0.557277
TTC26	0.00381403	0.55715
CDCA3	0.00381623	0.557121
AP000897.2	0.00386703	0.55646
L2HGDH	0.00386788	0.556449
ZNF480	0.00387645	0.556339
C19orf57	0.00387878	0.556309
AL592435.1	0.00388668	0.556207
AC087761.1	0.00389874	0.556052
NKX2-1-AS1	0.00390095	0.556023
BUB1	0.00392127	0.555763
GINS4	0.00393421	0.555598
SAPCD2	0.00396934	0.555152
AC016687.1	0.00397994	0.555018
AC104117.4	0.00399266	0.554858
RALBP1	0.00400073	0.554756
MMAB	0.00400108	0.554752
AC010538.1	0.0040168	0.554554
NEK9	0.00401732	0.554548
LTBP3	0.00402073	0.554505
UBL7-AS1	0.00402094	0.554503
AC087222.1	0.00405997	0.554016
AL583805.1	0.00409692	0.55356
ZNF382	0.00410324	0.553482
AC011447.3	0.00410627	0.553444
RHPN1-AS1	0.00410775	0.553426
IGHV3-52	0.00411912	0.553287
F2RL3	0.00412313	0.553238
GALNT7	0.00412949	0.55316
AC020658.4	0.00414456	0.552976
AC090186.1	0.00418298	0.552509
MRPS25	0.00420015	0.552302
ANO6	0.00422373	0.552018
RNU6-1337P	0.00422855	0.55196
TRIM16	0.00424263	0.551791
FBXO43	0.0042434	0.551782
SCGB2B2	0.00424527	0.55176
ACOT13	0.00424668	0.551743
RNU2-20P	0.00426202	0.55156
SCGB1B2P	0.00426768	0.551493
MLH3	0.00427931	0.551354
AC116562.4	0.00429186	0.551206
SERBP1	0.00430472	0.551053
EFCAB14P1	0.00432264	0.550842
MMACHC	0.0043275	0.550785
FANCD2	0.00435944	0.550411
NKX2-1	0.00437249	0.550258
AL132657.1	0.00439038	0.55005
IGHV3-37	0.00439231	0.550028
CDK6	0.00440551	0.549875
TLK2P2	0.00440874	0.549837
IGHV3-41	0.00441275	0.549791
NIT2	0.00441596	0.549754
HADH	0.00441727	0.549739
METTL15	0.00445037	0.549357
ADGRA3	0.00447346	0.549093
AC006378.2	0.00449348	0.548864
ZNF397	0.00450327	0.548753
KATNBL1	0.00452475	0.548509
CEPT1	0.00453682	0.548373
SF3B3	0.0045414	0.548321
AC011893.1	0.00454634	0.548265
GPSM2	0.00455851	0.548128
PRMT3	0.00457031	0.547995
GSX1	0.00457216	0.547975
TMEM218	0.00458542	0.547826
LINC00051	0.00463277	0.547298
VINAC1P	0.00467386	0.546844
AC010947.1	0.00467516	0.546829
TAS2R10	0.00467811	0.546797
PLCH1	0.00469804	0.546578
ZDHHC15	0.00472095	0.546327
CLCN2	0.00472421	0.546291
BICD1	0.00473102	0.546217
RAB10	0.00473379	0.546187
AGBL2	0.0047479	0.546033
LINC01941	0.00475251	0.545983
MZB1	0.00477689	0.545719
AC002310.2	0.00478486	0.545633
CNOT6	0.00478673	0.545612
AC106799.3	0.00480885	0.545374
LRRC8D	0.00481463	0.545312
RNU6-316P	0.00482049	0.545249
ELOA-AS1	0.00482528	0.545198
AC105020.2	0.00484537	0.544982
RPL13P6	0.00485248	0.544907
RPL22P10	0.00486042	0.544822
AC011468.4	0.00486063	0.544819
PANK1	0.00486722	0.544749
MROH8	0.00487073	0.544712
PXN-AS1	0.0048787	0.544627
AC073349.3	0.00488516	0.544559
NFKBIL1	0.0049111	0.544284
MIR663B	0.00491413	0.544252
ZFP14	0.00492899	0.544095
RN7SL333P	0.00495936	0.543776
AC002310.1	0.00496096	0.543759
TMEM182	0.00498639	0.543493
SDCBP2-AS1	0.00499999	0.543352
RBFA	0.00505189	0.542814
NUCB2	0.00510263	0.542292
CCP110	0.00513694	0.541942
SRY	0.00514421	0.541868
CCHCR1	0.00516987	0.541608
NEU3	0.00518858	0.541419
FANCI	0.0052254	0.541049
AC104451.1	0.0052369	0.540933
KDM4D	0.00523926	0.54091
AC026356.1	0.00523944	0.540908
BPHL	0.00524808	0.540821
LRRC63	0.00525052	0.540797
AC079070.1	0.00525739	0.540728
AP001784.1	0.00525785	0.540724
PDCD7	0.00525865	0.540716
INCENP	0.00527059	0.540597
AC055822.1	0.00527389	0.540564
TRIM4	0.00528115	0.540492
AC107241.1	0.00529026	0.540401
GAS5-AS1	0.00529635	0.540341
TBC1D26	0.00530643	0.540241
SLC1A4	0.00532791	0.540029
RNU6-398P	0.00534023	0.539907
ROR1	0.00535753	0.539737
RNF8	0.0053597	0.539716
CRYL1	0.00536384	0.539675
LINC02027	0.00537823	0.539534
ZNF887P	0.00542349	0.539093
PAX8-AS1	0.00543926	0.53894
AL078581.1	0.00544151	0.538918
AL031009.1	0.00545522	0.538785
CIT	0.00546857	0.538656
FLVCR1-DT	0.00546946	0.538647
KLHL42	0.0054705	0.538637
MIR4457	0.00547544	0.53859
CLUAP1	0.00551724	0.538188
DHFR2	0.005534	0.538028
ZNF252P	0.00553775	0.537992
RAD51	0.00553983	0.537972
AC144568.1	0.00555377	0.537839
HRK	0.00555636	0.537814
AC008147.4	0.00556684	0.537715
AC098487.1	0.00557226	0.537663
IFNAR2	0.0055789	0.5376
APOA4	0.0055834	0.537557
ZNF607	0.00564759	0.536951
AL031679.1	0.00565904	0.536844
AC084855.1	0.00567504	0.536694
HS6ST2	0.00567752	0.536671
ACADSB	0.00568722	0.53658
CDK5RAP3	0.00569142	0.536541
AC008964.1	0.00569372	0.536519
CD96	0.00569428	0.536514
CMSS1	0.00571697	0.536303
PTMAP10	0.00572648	0.536214
AP001469.2	0.00572918	0.536189
AL049780.3	0.00572938	0.536187
LINC02527	0.00573679	0.536119
TSKU	0.00573687	0.536118
AL031673.1	0.00574742	0.53602
AC000068.2	0.00577912	0.535727
C12orf66	0.00578001	0.535719
RNY3	0.00581778	0.535372
NBPF1	0.00582812	0.535277
SRP14-AS1	0.00583935	0.535175
AC010970.1	0.00588836	0.534729
TRBV6-6	0.00588869	0.534726
AL390728.3	0.00589522	0.534666
SAP30L-AS1	0.00591051	0.534528
AC006043.1	0.00593704	0.534289
AC126120.1	0.00593704	0.534289
PPIAP74	0.00593704	0.534289
AL022324.3	0.00596051	0.534078
AC130650.2	0.00596416	0.534045
FANCA	0.00599961	0.533727
RNU6-529P	0.00602038	0.533542
WDR60	0.00604716	0.533304
UBE2T	0.00606247	0.533169
AL606468.1	0.00609608	0.532872
STAU2	0.00610467	0.532796
MRPL57	0.00611425	0.532712
AC074024.1	0.00613263	0.53255
ESPL1	0.00615042	0.532395
AC132942.1	0.00615594	0.532346
GPANK1	0.00615894	0.53232
BTN2A3P	0.00617347	0.532193
AC009237.3	0.00619065	0.532044
AL135786.1	0.00619963	0.531966
NPNT	0.00619987	0.531964
IGHV3-65	0.00620134	0.531951
ZNF721	0.0062027	0.531939
FAM111A-DT	0.00621858	0.531801
FAIM	0.00623054	0.531698
ZNF260	0.00625365	0.531498
RPS12P16	0.00626127	0.531433
GMPS	0.00626576	0.531394
AC012020.1	0.00628194	0.531255
OIP5	0.00631464	0.530974
NPM1P9	0.00633186	0.530827
AC026471.4	0.00633548	0.530796
LINC02082	0.00638125	0.530407
SLC25A40	0.00641367	0.530133
ZNF197	0.00645745	0.529764
RNY3P1	0.00647223	0.52964
AC104306.1	0.006474	0.529625
RNU6-342P	0.00647514	0.529616
RN7SL498P	0.00648118	0.529565
HCG25	0.00648951	0.529496
ZNF45	0.00649461	0.529453
MSH2	0.00650373	0.529377
ZC4H2	0.00650637	0.529355
AC010245.2	0.00651847	0.529254
AC112203.1	0.0065502	0.52899
RNU5A-5P	0.0065542	0.528957
AC093388.1	0.00656144	0.528897
AC007485.2	0.00658491	0.528703
AC011257.1	0.00660967	0.528499
IWS1	0.00662647	0.52836
TBCD	0.0066625	0.528065
CU634019.6	0.00668303	0.527897
GTPBP10	0.00668363	0.527893
AC002464.1	0.00668583	0.527875
PSRC1	0.00669086	0.527834
RN7SL835P	0.00669693	0.527784
FBXO25	0.00672258	0.527576
RPRD1A	0.00672715	0.527539
RNU6-1027P	0.00673594	0.527467
PDE7A	0.00674165	0.527421
AL035461.2	0.00676239	0.527253
AC100850.1	0.00677499	0.527152
KRTAP8-2P	0.00677499	0.527152
MESD	0.00677701	0.527135
PSMG4	0.00678819	0.527045
EGFL8	0.00679356	0.527002
TRBV27	0.00684533	0.526587
ANTXR1	0.00685669	0.526496
BHLHB9P1	0.0068952	0.526189
AC023310.2	0.00691944	0.525997
AC084757.4	0.00692646	0.525941
ENTPD5	0.00694059	0.52583
MIR551B	0.00694866	0.525766
MTND6P6	0.00694866	0.525766
ACTL6A	0.00701597	0.525237
PABPC1P7	0.00705046	0.524967
MYMX	0.00705715	0.524915
CROCCP3	0.00706234	0.524874
AC096649.2	0.00706392	0.524862
AC007406.5	0.0070661	0.524845
AC025176.1	0.00708667	0.524685
PTK7	0.00713062	0.524345
AL390728.1	0.00713268	0.524329
ATRN	0.00713396	0.524319
FLVCR1	0.00716178	0.524104
KLRA1P	0.00718014	0.523963
AL355432.1	0.00718265	0.523944
AC027271.1	0.00719424	0.523855
TRMT10A	0.00720487	0.523774
TRMT13	0.00721598	0.523688
AC007092.1	0.00721863	0.523668
AL109628.1	0.00721863	0.523668
GAPDHP37	0.00722995	0.523582
AL109615.4	0.00723654	0.523531
RPL34-AS1	0.00724659	0.523455
BATF3	0.00726649	0.523303
AC011477.8	0.00727345	0.52325
AC004076.2	0.00728882	0.523134
MRS2	0.00731251	0.522954
ABCA11P	0.00732329	0.522873
AC120053.1	0.00734876	0.52268
C22orf15	0.00737549	0.522479
RPL7AP66	0.00740707	0.522243
AC011330.3	0.00741104	0.522213
RNA5SP307	0.00741392	0.522191
TUBGCP4	0.00742891	0.522079
GEMIN8	0.00742891	0.522079
AC011447.7	0.0074318	0.522058
UPF3B	0.00746062	0.521843
GATC	0.00748947	0.521629
AC007731.5	0.00751702	0.521425
AC106707.2	0.00754071	0.52125
MIR4747	0.00754099	0.521248
SCYL3	0.0075446	0.521221
RNU6-759P	0.00758371	0.520934
ZNF225	0.00759361	0.520861
AC020904.2	0.00761452	0.520708
AC073583.1	0.00762397	0.520639
AK2	0.00765388	0.520421
TTLL5	0.00766049	0.520372
VAPB	0.00766785	0.520319
INTS2	0.00769193	0.520144
WDR12	0.00770146	0.520075
CDKN2B-AS1	0.00770509	0.520049
FAM30B	0.00770598	0.520042
MAGI2	0.00773097	0.519862
AL136181.1	0.00774943	0.519728
ADARB2-AS1	0.00775328	0.519701
TXLNGY	0.00778447	0.519476
ZNF347	0.00779579	0.519395
ZNF90	0.00780458	0.519332
THNSL1	0.00789885	0.51866
RPLP0P2	0.00789914	0.518658
ADAL	0.00791071	0.518576
REXO5	0.00791843	0.518521
ANAPC10P1	0.00795617	0.518255
CYB5D2	0.00797831	0.518099
AC008393.1	0.00798495	0.518052
FAM86KP	0.00801541	0.517838
ZMYM4	0.00801577	0.517836
XGY1	0.00804779	0.517612
NSL1	0.00804937	0.517601
POT1	0.00805134	0.517587
SLC5A3	0.00810414	0.517219
GATB	0.00811153	0.517168
AL359641.1	0.00811614	0.517136
RNA5SP286	0.00811614	0.517136
ZBTB12	0.00812404	0.517081
LINC02325	0.00814578	0.516931
LINC00273	0.00815671	0.516856
RPS17P5	0.00816854	0.516774
DSCC1	0.00817319	0.516742
FAM27C	0.0082087	0.516497
LEO1	0.00822019	0.516419
AC010618.4	0.0082328	0.516332
AC079753.1	0.00823761	0.516299
AC112777.1	0.00825381	0.516188
TRBV8-2	0.00825487	0.516181
PPAT	0.00826732	0.516096
LEF1-AS1	0.00827397	0.516051
UNG	0.00827625	0.516035
FBN1	0.00834366	0.515577
AC011506.1	0.00835626	0.515491
INE2	0.00836793	0.515412
AC090125.1	0.00840518	0.515161
TP53RK	0.00840744	0.515146
AC091905.3	0.00843273	0.514976
DNAJC3-DT	0.00845294	0.51484
EGFEM1P	0.0084553	0.514824
ZNF518A	0.00845905	0.514799
AP000350.5	0.00846143	0.514783
AC022558.3	0.00847799	0.514672
ZNF774	0.00847993	0.514659
RNU6-1013P	0.00849002	0.514592
AGGF1P3	0.00850586	0.514486
SNRPGP2	0.00852049	0.514389
PDE6D	0.00857488	0.514028
BECN2	0.00857818	0.514006
AC108449.3	0.00859877	0.51387
ZNF660	0.00862622	0.513688
AC004943.1	0.00862654	0.513686
Z92544.1	0.00863337	0.513641
AC093788.1	0.00864729	0.51355
ZNRD1ASP	0.00865786	0.51348
PXDN	0.00866136	0.513457
CCDC136	0.00866895	0.513407
RIPPLY3	0.0086704	0.513398
MCF2L-AS1	0.00868061	0.513331
AC017050.1	0.00869077	0.513264
PUS7L	0.00869488	0.513237
ENPP7P11	0.00870071	0.513199
AC104596.1	0.00870729	0.513156
SLFN11	0.00871637	0.513097
AC003071.1	0.00873264	0.512991
ACTBP9	0.00873474	0.512977
AC100814.1	0.00873852	0.512952
PTPDC1	0.00873976	0.512944
MIR4667	0.00874853	0.512887
AC018737.2	0.00876689	0.512768
ZNF702P	0.00877413	0.512721
AC098820.3	0.0087955	0.512582
MIR502	0.00879841	0.512563
AC138655.1	0.00881131	0.512479
TMEM18	0.00881739	0.51244
DROSHA	0.0088317	0.512347
ZFP69	0.00884245	0.512278
AL035252.3	0.00885948	0.512168
AC019205.1	0.00888337	0.512014
AC093833.1	0.00889376	0.511948
RPS3AP3	0.00889782	0.511921
AC026356.2	0.00891283	0.511825
POLR3KP2	0.008914	0.511818
FASTKD1	0.00892622	0.511739
HMHB1	0.00898027	0.511394
GPR180	0.00899006	0.511332
PLGLB2	0.00899084	0.511327
ARL5AP4	0.00902131	0.511133
AC017071.1	0.00902301	0.511122
HSD17B8	0.00913569	0.51041
RMDN1	0.00918199	0.51012
MAGOH3P	0.00920511	0.509976
AL049779.2	0.00923702	0.509777
LINC02539	0.00923898	0.509764
AC007262.2	0.00924458	0.50973
AL359704.1	0.00928453	0.509482
CCDC77	0.00930844	0.509333
AC073869.2	0.00932002	0.509262
AGGF1	0.009359	0.509021
AC106799.2	0.00937411	0.508928
C1orf56	0.00943215	0.508572
AC247036.1	0.0094473	0.50848
AC003005.2	0.00947704	0.508298
DYNC2LI1	0.00949521	0.508188
POLR3K	0.00952616	0.508
C1orf74	0.00953651	0.507937
AC117395.1	0.0095393	0.50792
SNORD13P3	0.00955346	0.507834
AC078795.1	0.00966508	0.507162
EPM2A	0.00968367	0.50705
AC017079.2	0.00973528	0.506742
AC010615.1	0.00974199	0.506702
SPICE1	0.00974747	0.506669
CTBP1-DT	0.00978326	0.506457
FAM86B2	0.00979893	0.506364
ARSK	0.00980067	0.506353
LRRC17	0.00980392	0.506334
MDM1	0.00980526	0.506326
NCK1-DT	0.00982069	0.506235
ZNF681	0.00984822	0.506072
VARS2	0.00985843	0.506012
NSRP1	0.00988739	0.505841
CCDC102B	0.0099141	0.505684
AC060780.1	0.009953	0.505456
AL121917.2	0.00995446	0.505448
MTCO1P2	0.00995641	0.505436
TCF7	0.00995854	0.505424
AC024884.2	0.00998757	0.505254
AL445231.1	0.0100107	0.50512
SMC2	0.0100149	0.505095
AC009102.2	0.0100218	0.505055
DBT	0.0100354	0.504976
C9orf163	0.0100581	0.504844
AL021308.1	0.0100714	0.504767
AC008065.1	0.0100717	0.504765
FANCE	0.0100807	0.504713
LINC02055	0.0101051	0.504572
AC023347.1	0.0101247	0.504459
RNU6-10P	0.0101313	0.504421
CCDC150	0.01014	0.504371
AC089998.3	0.0101504	0.504311
AC245187.2	0.0101719	0.504187
NPIPB7	0.0101755	0.504166
AC025259.2	0.0101986	0.504034
PTP4A2P2	0.010221	0.503906
AC092835.1	0.0102333	0.503835
MIR503HG	0.0102554	0.503709
AL512283.1	0.0102801	0.503568
FARP1	0.0102958	0.503479
ETNK1	0.010306	0.50342
RFX7	0.0103101	0.503397
CKAP5	0.0103257	0.503309
ACVR2B	0.0103315	0.503276
ZNF37A	0.0103409	0.503223
RHNO1	0.0104369	0.502681
AC139887.2	0.0104432	0.502645
AC022150.4	0.0104505	0.502604
FBXO17	0.0104508	0.502602
ZNF610	0.0104565	0.50257
MAP4K4	0.0104582	0.502561
MIR298	0.0104746	0.502468
SWI5	0.0105319	0.502148
SPSB4	0.0105742	0.501912
ATPAF1	0.0106237	0.501637
AP006288.1	0.0106278	0.501615
AC104653.2	0.0106358	0.50157
AC011979.1	0.0106519	0.501481
AL442125.1	0.0107072	0.501176
EEF1A1P28	0.0107146	0.501135
GSEC	0.0107449	0.500968
PSMG3-AS1	0.0107491	0.500946
SLF2	0.0107762	0.500797
FXYD2	0.0107822	0.500764
ZNF77	0.0108203	0.500556
HYKK	0.0108368	0.500466
LRRC34	0.0108415	0.50044
AC068768.1	0.0108506	0.500391
TPM2	0.0109328	0.499944
C1orf112	0.0109449	0.499879
AC006299.1	0.0109535	0.499832
MIR5583-2	0.0109627	0.499782
YAP1	0.0110179	0.499485
TSNARE1	0.011032	0.499409
LRRCC1	0.0110684	0.499214
LINC00885	0.0110824	0.499139
AL157400.2	0.011133	0.498869
PODN	0.0111362	0.498852
AL139021.2	0.0111841	0.498597
LIMA1	0.0112243	0.498384
ZSCAN29	0.0112661	0.498162
ZMYND11	0.0112909	0.498032
MSH5-SAPCD1	0.0112915	0.498028
AP1AR	0.0113122	0.497919
AC147651.1	0.0113573	0.497682
DSTNP2	0.0113618	0.497659
THAP5P1	0.0113641	0.497647
TFCP2	0.0114121	0.497396
RBM41	0.0114312	0.497296
SOS1-IT1	0.0114389	0.497256
UCHL5	0.0114553	0.49717
MAPK8IP2	0.0114927	0.496976
AL157932.1	0.011499	0.496943
AC100803.2	0.0115276	0.496795
DHCR7	0.0115416	0.496722
AC103739.2	0.0115517	0.49667
AHCYL1	0.0115641	0.496606
AC084782.1	0.0115647	0.496603
RPL23AP53	0.0115874	0.496486
AC139887.4	0.011597	0.496436
AL354892.3	0.011617	0.496333
AL451105.2	0.0116729	0.496046
TRO	0.0116893	0.495962
RNU6-858P	0.0117442	0.495681
RIC8B	0.0117535	0.495634
USP13	0.0117602	0.4956
ZFYVE9	0.0117614	0.495594
TYMSOS	0.0117632	0.495585
AC008885.2	0.0117873	0.495462
SMIM15-AS1	0.0117916	0.49544
AC005899.1	0.0117978	0.495408
TCF19	0.0118069	0.495362
ZKSCAN1	0.0118152	0.49532
RAD54B	0.0118352	0.495219
LRRN1	0.0118868	0.494957
KIF15	0.0119271	0.494754
WDCP	0.0119405	0.494687
AC108690.1	0.011941	0.494684
HES4	0.0119501	0.494639
ESCO2	0.0119541	0.494618
NHLRC2	0.0119764	0.494506
AL391840.3	0.011983	0.494473
NECAB3	0.0119855	0.494461
ADAM22	0.0120157	0.494309
DMPK	0.0120269	0.494253
PALB2	0.0120328	0.494224
KTN1-AS1	0.0120363	0.494206
MRPL19	0.0120387	0.494194
SELENOKP1	0.0120685	0.494045
AC006518.1	0.012073	0.494023
CEP162	0.0121001	0.493888
CCDC14	0.0121319	0.49373
AC073270.2	0.0121882	0.493451
PIGZ	0.0122268	0.49326
ZNF253	0.0122396	0.493197
PIP	0.0122445	0.493173
COG6	0.0122631	0.493081
C9orf85	0.0122977	0.492911
ELOVL5	0.0123151	0.492825
RNA5SP435	0.0123321	0.492743
ZNF785	0.0123464	0.492672
AC087385.3	0.0123859	0.492479
PMS1	0.01241	0.492362
POLR2KP2	0.0124485	0.492174
AC013391.2	0.0124611	0.492113
LINC01389	0.012469	0.492075
PXMP2	0.0124788	0.492027
ENOX2	0.0125105	0.491873
AP003059.1	0.0125395	0.491733
AC073529.1	0.0125501	0.491682
RPL21P40	0.0125632	0.491619
PIGM	0.0125633	0.491618
AC109811.2	0.0126479	0.491211
CPSF2	0.0126617	0.491145
POC1A	0.0126649	0.491129
C2orf68	0.0126964	0.490978
AC112496.1	0.0126965	0.490978
EXPH5	0.0127075	0.490925
COQ3	0.0127128	0.490901
TRBV9	0.0127338	0.4908
IGHVII-60-1	0.0127409	0.490766
SMAD1	0.0127532	0.490708
AC093677.3	0.012759	0.49068
C5orf51	0.0127829	0.490566
PLS1	0.012799	0.490489
METTL4	0.0128108	0.490433
AC093323.1	0.0128139	0.490419
CSTF3-DT	0.012814	0.490418
PDP2	0.0128193	0.490393
ZNF780B	0.0128424	0.490284
TPM3P7	0.0128424	0.490283
SAPCD1	0.0128603	0.490199
PTER	0.012877	0.49012
MGME1	0.0128782	0.490114
FAM114A2	0.0129086	0.48997
AC023632.1	0.0129801	0.489634
MYORG	0.0129981	0.489549
AC090686.1	0.0130036	0.489523
AP002373.2	0.0130065	0.48951
TEX10	0.0130071	0.489507
MTND4P35	0.0130326	0.489388
HIST1H4I	0.013033	0.489386
ARMCX5-GPRASP2	0.0130548	0.489284
LINC00494	0.0130811	0.489161
ANKRD20A5P	0.0131008	0.489069
NHLRC4	0.013104	0.489054
KLHL8	0.013119	0.488984
AC107068.1	0.0131334	0.488917
CDC25C	0.0131389	0.488892
AC023886.2	0.0131959	0.488627
PAXIP1-AS2	0.0131998	0.488609
GABPB1-AS1	0.0132379	0.488433
TRIP11	0.0132671	0.488298
AASDH	0.0132782	0.488247
AC119403.1	0.013292	0.488183
AP002433.2	0.0133361	0.48798
AC009902.3	0.0133623	0.48786
AC136628.3	0.0133813	0.487773
ARHGEF9	0.0133868	0.487748
ZMYND19	0.0134157	0.487616
AL118506.1	0.0134354	0.487526
AP005212.4	0.0134616	0.487406
AC008443.5	0.0134678	0.487378
EHBP1	0.013482	0.487313
ZNF701	0.0136513	0.486547
AC092070.2	0.0136786	0.486423
ZNF415	0.0136862	0.486389
AC093227.1	0.0136864	0.486388
C8orf37	0.0137125	0.486271
EMSY	0.013831	0.485741
RPS8P3	0.0138334	0.48573
OR13C2	0.013871	0.485563
ZNF613	0.0139164	0.485361
RNU6-377P	0.0139551	0.48519
ZFYVE21	0.0139685	0.485131
LZTFL1	0.0139785	0.485087
RNU6-1046P	0.0141045	0.484532
ST13P5	0.0141385	0.484383
USP54	0.0141509	0.484328
AC092349.1	0.0141724	0.484235
AC007938.2	0.0142015	0.484108
ABI2	0.01422	0.484027
GPR20	0.0142409	0.483936
LINC00846	0.0142503	0.483895
HAUS1P2	0.0142931	0.483709
AGBL5	0.0143328	0.483537
METRN	0.0143709	0.483372
KRTAP8-1	0.0143886	0.483296
NUP37	0.0143963	0.483263
RBBP9	0.0144389	0.483079
MFAP1	0.0144722	0.482936
WDR5	0.0144858	0.482878
Z97055.1	0.0144911	0.482855
SIX5	0.0145344	0.482669
HDHD2	0.0145682	0.482525
TBC1D19	0.0146114	0.482341
XKR5	0.0146251	0.482282
PTRH2	0.0146797	0.48205
KRTAP11-1	0.0147193	0.481882
CU633906.2	0.014737	0.481807
CDCA7	0.0147424	0.481784
NTN5	0.014757	0.481722
AC073264.1	0.0147766	0.48164
GNL3LP1	0.0147824	0.481615
IFI16	0.014794	0.481566
AL078600.1	0.0147995	0.481543
UGDH	0.0148168	0.48147
ABHD18	0.0148332	0.481401
ORC3	0.0148418	0.481365
AC087289.1	0.0148608	0.481285
CNOT1	0.0149278	0.481004
ASRGL1	0.0149313	0.480989
PTGR2	0.0149346	0.480976
AC139887.1	0.0149409	0.480949
AL357078.3	0.0149461	0.480928
CKLF-CMTM1	0.014974	0.480811
RAPGEF5	0.0150219	0.480611
MIS18A	0.0150224	0.480609
LZTS1	0.0150243	0.480601
SOBP	0.0150493	0.480497
TINAGL1	0.0150605	0.480451
ZNF605	0.0150867	0.480342
PRIMPOL	0.0150904	0.480327
AC058823.1	0.0151277	0.480172
AC069454.1	0.0151302	0.480161
ATN1	0.0151555	0.480057
AKR1B1P3	0.0151582	0.480045
RN7SL454P	0.0151873	0.479925
AK4P1	0.0152121	0.479823
BX649601.1	0.0152132	0.479819
DUSP16	0.015256	0.479642
RPS2P6	0.0152597	0.479627
MAL	0.0152854	0.479522
BUB1B	0.015375	0.479154
AL161742.1	0.0153865	0.479108
PKD2	0.0153877	0.479103
CHDH	0.015464	0.478792
AL353576.1	0.0154936	0.478671
AL121890.4	0.0155144	0.478587
HMGN2P15	0.0155324	0.478514
UPF3A	0.0155504	0.478441
ZNF807	0.0155825	0.478311
ATP5MC1P3	0.0155984	0.478247
RPL10P4	0.0156208	0.478157
AC080013.1	0.015696	0.477854
NMTRQ-TTG12-1	0.0156973	0.477849
PPIAP28	0.0156973	0.477849
RNY3P5	0.0156973	0.477849
AZGP1P1	0.015729	0.477722
AC093720.1	0.0157444	0.47766
AC010761.6	0.0157671	0.477569
LINC00920	0.0157776	0.477527
N6AMT1	0.0158357	0.477295
AC004816.1	0.0158439	0.477262
AC006116.2	0.0158641	0.477182
MKI67	0.0159315	0.476914
MTND6P4	0.0159665	0.476775
KCNAB3	0.0159686	0.476767
AC074367.1	0.0159775	0.476731
AL353593.1	0.0159996	0.476644
CSRP3-AS1	0.0160682	0.476373
AC093249.2	0.0160876	0.476296
CFHR3	0.0161203	0.476168
SRPK2	0.0161567	0.476025
METTL3	0.016181	0.47593
AC132807.1	0.0161924	0.475885
MTFMT	0.0162207	0.475774
TBC1D31	0.0162426	0.475689
LINC00243	0.016253	0.475648
AC097522.2	0.0162636	0.475607
HOMER2P1	0.0162636	0.475607
TGDS	0.0162888	0.475509
AC122719.1	0.0163035	0.475451
RNU6-1242P	0.0163579	0.47524
ZNF445	0.0164034	0.475063
AC009107.2	0.0164039	0.475061
RPL19P20	0.0164067	0.47505
TTC36	0.0164154	0.475016
LINC01337	0.0164299	0.474961
MYB	0.0164655	0.474823
AC092324.1	0.0165374	0.474546
PPIAP21	0.0165374	0.474546
RCC1	0.0165501	0.474497
NT5C2	0.0165689	0.474424
TMBIM7P	0.0166012	0.4743
FAM217B	0.0166211	0.474224
MYT1L	0.0166603	0.474074
FRMD4A	0.0166625	0.474065
NUP43	0.016672	0.474029
PLK1	0.0166861	0.473975
SPATA41	0.0166877	0.473969
C6orf223	0.0166902	0.473959
PRKDC	0.0166963	0.473936
NEIL3	0.0167323	0.473799
RNU6-144P	0.0167719	0.473648
ZNF28	0.0168153	0.473483
PHF23	0.0168192	0.473468
RPP25L	0.0168468	0.473364
RN7SKP291	0.0168521	0.473343
AC087752.1	0.016866	0.473291
AC139530.4	0.0168894	0.473202
PRUNE1	0.0168902	0.473199
C17orf67	0.0169128	0.473114
AC022819.1	0.0170048	0.472767
AC026150.3	0.0170368	0.472646
SEPT2P1	0.0171342	0.472281
TMEM169	0.0171832	0.472098
AP001063.1	0.0171849	0.472092
NDUFAF7	0.0171932	0.472061
ACER2	0.017216	0.471976
FKBP15	0.0172298	0.471925
ZNF730	0.0172473	0.47186
SETD5	0.0172654	0.471793
FANCF	0.0172814	0.471733
AC079612.1	0.0173024	0.471655
NANOGP8	0.0173404	0.471514
FAM72D	0.0173841	0.471353
LCLAT1	0.0174167	0.471232
ZDHHC13	0.0174476	0.471118
KRIT1	0.0174675	0.471045
SERTAD4	0.0175012	0.470921
MYC	0.0175568	0.470717
TARDBPP2	0.0175569	0.470717
PTPRD	0.0175837	0.470618
SLC2A3P2	0.0175874	0.470605
CR381670.1	0.0176094	0.470524
RNF150	0.0176456	0.470392
GPATCH4	0.0176611	0.470335
AC104073.4	0.0176755	0.470283
MTIF2	0.0176951	0.470211
AL356608.1	0.0177616	0.46997
OTUD7B	0.0177864	0.46988
HHIP	0.0178175	0.469767
DDX11-AS1	0.017865	0.469595
HCG17	0.0178657	0.469593
RPL17P34	0.0178703	0.469576
SLC30A6	0.0178791	0.469544
AL096803.1	0.0179404	0.469323
LINC01134	0.0180202	0.469036
COL28A1	0.0181087	0.468719
ZC3H13	0.0181218	0.468672
NBPF2P	0.0181707	0.468498
RPL18P11	0.0182335	0.468275
EDEM3	0.0182458	0.468231
GTF2E1	0.0182846	0.468093
TOP2A	0.0182877	0.468082
ZNF234	0.0183097	0.468004
ZFP2	0.0183152	0.467985
CHKB-DT	0.0183284	0.467938
RPL3P12	0.018427	0.46759
FTH1P23	0.0184758	0.467418
MRPL35	0.0185263	0.467241
AL356481.3	0.0185441	0.467178
AC005019.1	0.0185564	0.467135
CDC7	0.0186003	0.466982
PIGL	0.0186197	0.466914
ENPP7P5	0.0186415	0.466838
NBAT1	0.0186498	0.466809
AL391840.2	0.0186876	0.466677
LINC00221	0.0187428	0.466485
ZNF226	0.0188043	0.466271
AL451064.2	0.0188189	0.466221
AC245369.1	0.0188559	0.466093
EFL1P1	0.0188828	0.466
USP40	0.0189044	0.465925
RPS26P45	0.01893	0.465837
AC005034.5	0.0189695	0.465701
RN7SKP44	0.019001	0.465593
RPL5P16	0.0190172	0.465537
LINC01934	0.0190175	0.465536
MIR1285-1	0.0190431	0.465448
AC116651.1	0.0190559	0.465404
SERTAD4-AS1	0.0190625	0.465381
AC092685.1	0.019141	0.465113
PCNX2	0.0191441	0.465102
HELLPAR	0.0191446	0.465101
GABRR2	0.0191849	0.464963
ZNF302	0.0192027	0.464902
SMYD2	0.0192273	0.464819
AL049830.3	0.0192957	0.464586
AC104211.1	0.0193071	0.464548
MUC20	0.0193502	0.464401
AL583805.2	0.0193814	0.464296
AC019069.1	0.0193944	0.464252
AL022342.1	0.0193986	0.464238
IQCH-AS1	0.0194382	0.464104
GGTA2P	0.0194728	0.463987
AC097500.1	0.0195773	0.463636
ARMC1	0.0195811	0.463623
AC004383.1	0.0195937	0.463581
CENPM	0.0196093	0.463529
ZNF594	0.0196121	0.463519
AC023632.2	0.019653	0.463383
RPS4XP5	0.0196633	0.463348
SIK2	0.0196674	0.463335
STX17	0.0196807	0.46329
AC025445.1	0.0197024	0.463218
ZNF623	0.0197069	0.463203
PIK3R3	0.0197283	0.463131
AC079385.2	0.0197473	0.463068
AC107871.1	0.019764	0.463012
MIR378H	0.0197829	0.46295
RNA5SP145	0.0198103	0.462858
SIMC1	0.0198639	0.462681
RPL18AP16	0.0199254	0.462477
LINC00563	0.0199266	0.462473
AC007952.5	0.0199514	0.462391
LINC00342	0.020024	0.462152
C10orf88	0.0200325	0.462124
HNRNPR	0.0200559	0.462047
AC092295.1	0.0200743	0.461986
AC091185.1	0.0200774	0.461976
AL391416.1	0.0200779	0.461974
SNHG19	0.0201436	0.461759
FRA10AC1	0.0201642	0.461691
LDAH	0.0202406	0.461442
AC108463.1	0.0202484	0.461416
AC016691.1	0.0202653	0.461361
MRPS18B	0.0202878	0.461288
CGN	0.0203073	0.461224
RNU6-519P	0.020324	0.46117
AL451064.1	0.0203613	0.461048
LINC01359	0.0203846	0.460973
MIR4432	0.0204169	0.460868
FMO4	0.0204363	0.460805
CUTC	0.0204388	0.460797
CORO2A	0.0204543	0.460747
TAS2R20	0.0205196	0.460536
MELK	0.0205236	0.460523
AC005034.6	0.0206333	0.46017
AC020779.1	0.0206465	0.460127
DND1P1	0.0206475	0.460124
PAICS	0.0206485	0.460121
RASGRP1	0.0206524	0.460108
AL391840.1	0.0206911	0.459984
UMODL1	0.0206986	0.45996
ANKFN1	0.0207006	0.459954
AC084782.3	0.0208249	0.459556
BRAFP1	0.0208293	0.459542
SKA2	0.0208316	0.459535
GSTCD	0.0208971	0.459326
ASIC1	0.0209023	0.45931
RHPN1	0.0209518	0.459153
CBR4	0.0209846	0.459049
DM1-AS	0.0209909	0.459029
TRIM27	0.0210217	0.458931
HOMER1	0.0210248	0.458921
BCDIN3D	0.0210369	0.458883
NT5M	0.0210579	0.458817
MT-TM	0.0210806	0.458745
TRG-AS1	0.0211063	0.458664
SUSD4	0.0211324	0.458581
LINC01228	0.0212452	0.458227
AC024361.1	0.0212466	0.458222
IGHV3-71	0.0213073	0.458032
GPATCH1	0.0213184	0.457997
EFCAB11	0.0213453	0.457913
MELTF-AS1	0.0213481	0.457904
IFT81	0.0213499	0.457899
BNIP3P16	0.0213528	0.45789
SLC35A5	0.0213582	0.457873
RSPRY1	0.0213639	0.457855
AC138470.1	0.0213686	0.45784
ZADH2	0.0213819	0.457799
AL589666.2	0.0213837	0.457793
ZNF544	0.0213919	0.457768
AC055748.1	0.0213997	0.457743
RNY4P23	0.0214143	0.457698
ZKSCAN7-AS1	0.0214279	0.457655
TMEM254	0.0214441	0.457605
AC124856.1	0.0215388	0.45731
GOLGA3	0.021541	0.457304
HESX1	0.0215419	0.457301
AC009362.1	0.0215609	0.457242
SPC25	0.0215707	0.457212
CR769767.2	0.0216235	0.457048
MIR4452	0.0216235	0.457048
KIF4A	0.021631	0.457025
ZNF849P	0.0216566	0.456946
DCUN1D4	0.0217237	0.456739
FKBPL	0.0217324	0.456712
AC012309.2	0.021802	0.456498
LRP4	0.0218471	0.456359
AC007370.1	0.0219058	0.456179
AL365434.1	0.0219676	0.45599
AL139094.1	0.0219679	0.455989
DIAPH3	0.0219722	0.455976
IGHVII-53-1	0.0219726	0.455975
AC008610.1	0.0219748	0.455968
NUP205	0.0219997	0.455893
ZNF30	0.0220046	0.455878
ETV6	0.0220313	0.455796
RN7SKP57	0.0220428	0.455761
AC114744.1	0.0220506	0.455737
ANKRD17	0.0220537	0.455728
GPLD1	0.0220598	0.455709
C11orf54	0.0220855	0.455631
AC012184.3	0.0221031	0.455578
WDR45BP1	0.0221034	0.455577
AC234781.1	0.0221181	0.455532
RF00614	0.0221694	0.455376
AC006328.1	0.0221928	0.455305
MIR8082	0.0221928	0.455305
AC074135.1	0.0222291	0.455196
RBM12B	0.02224	0.455163
AC026748.3	0.0222536	0.455121
ZNRF1	0.0222702	0.455071
ICE2	0.0222866	0.455022
RIMKLB	0.0223301	0.454891
AC002116.2	0.0223699	0.454771
AC093512.2	0.0224012	0.454677
AC034102.4	0.0225509	0.454228
MAT2B	0.0225725	0.454163
HIST1H4D	0.0226097	0.454052
LCN8	0.022626	0.454004
RPL7P15	0.0226287	0.453996
AC138776.1	0.0228398	0.453368
RNA5SP69	0.022887	0.453229
VAMP4	0.0229293	0.453104
AC087650.1	0.0229378	0.453079
SNHG25	0.0229508	0.453041
AC004231.3	0.0230423	0.452771
IL37	0.0230644	0.452707
AL158070.2	0.0230669	0.452699
IGLVIVOR22-1	0.0231032	0.452593
SLC6A18	0.0231362	0.452496
TIMM8BP2	0.0231403	0.452484
ZNF638	0.0231595	0.452428
MTND4P32	0.0232218	0.452246
AC091057.2	0.0232902	0.452046
FGFR1OP	0.0233131	0.451979
SLC25A17	0.0233384	0.451906
MAGED1	0.0233501	0.451872
UBE2CP2	0.0233605	0.451842
RPL3P9	0.0233783	0.45179
RPL3P3	0.0233939	0.451745
CENPH	0.023404	0.451715
AC020910.1	0.0234071	0.451706
AC004408.2	0.0234797	0.451496
AL109918.1	0.0234899	0.451467
LMNB1	0.0235422	0.451315
HIST1H4L	0.0235623	0.451257
MCMBP	0.0235799	0.451206
HIVEP2	0.0235907	0.451175
AC099568.2	0.0236219	0.451086
RPL23AP88	0.0236268	0.451071
AC004812.2	0.0236672	0.450955
AJAP1	0.0236773	0.450926
AL035665.1	0.0236789	0.450922
ZHX2	0.0236807	0.450917
AL353796.1	0.0237293	0.450777
NBR2	0.0237444	0.450734
AC244035.2	0.0237663	0.450671
AC130324.3	0.0237973	0.450582
TIMM21	0.0238079	0.450552
SLC16A1-AS1	0.0238177	0.450524
C1QTNF3	0.0238279	0.450495
SDHAF4	0.0238329	0.45048
TTLL4	0.023851	0.450428
CDC25B	0.0238647	0.450389
ZNF583	0.0238781	0.450351
GUSBP1	0.0239029	0.45028
AMDHD1	0.0239552	0.450131
AC055855.1	0.0239725	0.450082
RNA5SP355	0.0239779	0.450067
SNX25P1	0.024105	0.449706
EEF1A1P1	0.0241469	0.449587
METTL14-DT	0.0241499	0.449579
SPC24	0.0243122	0.449121
CDC16	0.0243423	0.449036
AC022413.2	0.0243437	0.449032
LARP1B	0.0243473	0.449022
CRTC3-AS1	0.0243986	0.448878
MOSPD2	0.0244017	0.448869
MAGED4	0.0244434	0.448752
SNRPCP16	0.0244505	0.448733
SLC35E4	0.0244934	0.448612
KIF1BP	0.0245238	0.448528
CCDC18	0.0245517	0.44845
LETM1	0.0246581	0.448153
AC025171.1	0.0246869	0.448073
AP003392.4	0.0247244	0.447969
MICA	0.0247247	0.447968
OR10R1P	0.0247311	0.44795
MME	0.024818	0.44771
LINC00618	0.0248263	0.447687
AL117692.1	0.0248373	0.447656
AC024060.1	0.0248381	0.447654
DYRK4	0.0248678	0.447572
LEAP2	0.0249037	0.447473
PRDX3	0.0249772	0.44727
WDR76	0.0249817	0.447258
ZNF674	0.0249845	0.44725
SCLY	0.0250004	0.447206
IPO8	0.0251453	0.446809
KCTD19	0.0252028	0.446652
FANCC	0.0252228	0.446597
AC112128.1	0.0252751	0.446454
OSBPL1A	0.0252769	0.446449
RFX3-AS1	0.0252801	0.446441
ZWINT	0.0253436	0.446268
GRK5	0.0253486	0.446254
AC078817.1	0.025374	0.446185
MMS22L	0.0253851	0.446155
RPARP-AS1	0.0254249	0.446047
LAPTM4BP2	0.0254271	0.446041
C19orf18	0.0254733	0.445916
BTN3A3	0.0255109	0.445814
POGLUT1	0.025521	0.445786
TCAIM	0.0255625	0.445674
ZNF710-AS1	0.0255973	0.44558
ENO2	0.0256176	0.445525
QSER1	0.0256451	0.445451
MIR6512	0.0256471	0.445446
SERAC1	0.025658	0.445416
ROCK2	0.0257163	0.44526
BCL7A	0.0257221	0.445244
BRIP1	0.0257229	0.445242
AL353743.1	0.0257368	0.445205
KHDC1	0.0257456	0.445181
ITGB3BP	0.0257767	0.445097
RNU6-606P	0.025798	0.44504
RNU6-130P	0.0258412	0.444925
AC005730.3	0.0258496	0.444902
TRBJ2-7	0.0258706	0.444846
AP000345.2	0.0259744	0.444569
CAMK1D	0.0259959	0.444511
RNU6-1136P	0.0260106	0.444472
BBS4	0.026039	0.444396
LINC02100	0.0260494	0.444369
CCDC26	0.0260527	0.44436
RBM12	0.0260677	0.44432
AL662795.2	0.02609	0.444261
DMWD	0.0261205	0.44418
AC064836.2	0.0261499	0.444102
AL353763.1	0.0261606	0.444073
RBM17P4	0.0262459	0.443847
RPL17P26	0.0262466	0.443846
AL355574.1	0.0262521	0.443831
CT66	0.0262527	0.443829
RNU4-91P	0.0262705	0.443782
SMYD4	0.0263295	0.443627
OSGEPL1-AS1	0.0263334	0.443616
AC090017.1	0.0263453	0.443585
AC095041.1	0.0263453	0.443585
ADSS	0.0263455	0.443584
RPL17P22	0.0263667	0.443528
AC091979.1	0.0264078	0.44342
LINC01046	0.0264112	0.443411
ZKSCAN3	0.0264164	0.443398
PHF14	0.0264231	0.44338
SLC27A5	0.0264361	0.443346
NR5A2	0.0264628	0.443276
GEMIN5	0.0264693	0.443258
FAM215B	0.026473	0.443249
AL121890.2	0.0264746	0.443245
AC073389.2	0.0264944	0.443193
AC004877.2	0.026495	0.443191
BEX3	0.0265081	0.443157
AL138820.1	0.0265354	0.443085
RPL12P8	0.0265899	0.442942
ZNF84	0.0266356	0.442823
KCNS3	0.0266391	0.442814
NIFK-AS1	0.02665	0.442785
RNU6-1300P	0.0266528	0.442778
FAM122B	0.0266625	0.442752
PARD3	0.0266752	0.442719
RPL23AP72	0.0266948	0.442668
IRF2	0.0267132	0.44262
PROK1	0.0267493	0.442526
NUP160	0.026775	0.442459
AC010092.1	0.0267817	0.442442
AC026471.3	0.0268097	0.442369
MCM3	0.0268274	0.442323
AC092967.1	0.0268362	0.4423
AC005962.1	0.0268469	0.442272
COX6B1P6	0.0268491	0.442267
ENTPD6	0.0268628	0.442231
AC008677.2	0.0268648	0.442226
NAPA-AS1	0.0268983	0.442139
AC084782.2	0.0269923	0.441895
GMCL1	0.0270196	0.441825
AL022324.4	0.0270217	0.441819
MIR381HG	0.0270217	0.441819
ZNF747	0.0270573	0.441727
MYO5C	0.0270836	0.44166
IFT27	0.0271673	0.441444
FN3K	0.0271726	0.44143
BDH1	0.0272124	0.441328
AC069544.1	0.02732	0.441052
UGT3A2	0.0273468	0.440984
FEN1	0.0273653	0.440936
TCF12	0.027388	0.440878
AC074141.1	0.0273971	0.440855
ZNF891	0.0274072	0.440829
AC006480.2	0.0274592	0.440696
ENPP7P1	0.0274883	0.440622
MIR6505	0.0274887	0.440621
ZNF205	0.0275672	0.440422
EYA3	0.0276344	0.440251
LRRC20	0.0276392	0.440239
CENPK	0.0276624	0.44018
AL513175.2	0.0276996	0.440085
ZNF789	0.0277041	0.440074
AC125494.2	0.0278535	0.439697
ZNHIT1P1	0.0279189	0.439532
CRYGS	0.0279445	0.439467
TSHR	0.0279478	0.439459
CCDC74A	0.0279652	0.439415
POLQ	0.027975	0.439391
AP002472.1	0.0279919	0.439348
COPG2	0.0280284	0.439257
AL391095.1	0.0280443	0.439217
AC097662.1	0.0280625	0.439171
METTL21EP	0.0281806	0.438876
YTHDF1P1	0.0281875	0.438859
TNRC6C	0.0282407	0.438726
COX10-AS1	0.0282452	0.438714
AC068620.2	0.0282593	0.438679
GRAP2	0.0282639	0.438668
CYP4F35P	0.0282919	0.438598
SETP9	0.0283065	0.438562
CSPG4P12	0.0284418	0.438226
SEC14L2	0.0284515	0.438202
MCTS1	0.0284684	0.43816
TPT1P10	0.0284752	0.438143
HNRNPA1P52	0.0284901	0.438106
RNU6-1216P	0.0285002	0.438081
TMPO-AS1	0.0285166	0.43804
AL355773.1	0.0285228	0.438025
AL132857.1	0.0285827	0.437877
LINC02482	0.028623	0.437778
LARS	0.0286518	0.437707
UNC5CL	0.0286853	0.437624
UBE2C	0.0286914	0.437609
AC036108.2	0.028699	0.43759
AC024580.2	0.0287614	0.437437
AP001961.1	0.028777	0.437399
DNAH17	0.0288061	0.437327
AC079779.2	0.028814	0.437308
STK32C	0.0288975	0.437103
USP41	0.0292302	0.436292
ASB1	0.0292481	0.436249
DDX3P2	0.0292915	0.436144
AL603750.1	0.0292982	0.436128
UGDH-AS1	0.0293112	0.436096
GLE1	0.029318	0.43608
DCAF17	0.0293714	0.435951
CEP83	0.029404	0.435872
LURAP1	0.0294111	0.435855
AL161725.2	0.0294252	0.435821
CMTM8	0.0294351	0.435797
AC020915.2	0.0294661	0.435722
EPDR1	0.0294702	0.435712
ANAPC1	0.0294734	0.435704
AL161935.1	0.0294794	0.43569
RBL1	0.0295279	0.435573
AC234917.3	0.0296226	0.435346
POLR2KP1	0.0296296	0.435329
AC013472.1	0.0296528	0.435273
AL390123.1	0.0296751	0.43522
ESF1	0.0297219	0.435108
RPL26P37	0.029757	0.435024
C12orf45	0.0297722	0.434988
FANCG	0.029774	0.434983
AC013564.1	0.0298429	0.434819
AL451074.4	0.0298609	0.434776
SH3YL1	0.0299084	0.434663
SLC39A10	0.0299445	0.434577
CEP63	0.030008	0.434426
PSPC1-AS2	0.0300329	0.434367
COX18	0.0300484	0.43433
HTATSF1P2	0.030137	0.43412
RPL29P12	0.0301519	0.434085
PAX9	0.0301952	0.433982
CNTROB	0.0302018	0.433967
IGHVIII-22-2	0.0302412	0.433874
LNCAROD	0.0303783	0.433551
AL513365.1	0.03039	0.433523
CHCHD4	0.0304113	0.433473
LINC01058	0.0304546	0.433371
AC018647.2	0.0304609	0.433357
MTCO1P30	0.0305565	0.433132
AL645933.2	0.0305845	0.433067
CDK2	0.0306165	0.432992
TCFL5	0.030617	0.432991
BRCC3	0.03063	0.432961
NDUFA8	0.0306769	0.432851
ELOCP22	0.0307991	0.432566
MIR4688	0.0307991	0.432566
TAF11L13	0.0307991	0.432566
AC025161.1	0.0308064	0.43255
C17orf51	0.0309192	0.432288
Z93930.3	0.0310139	0.432068
CENPA	0.0310335	0.432023
SHMT1	0.0310532	0.431977
RAD51D	0.0310572	0.431968
AL117339.4	0.0310655	0.431949
NDUFAF2	0.031099	0.431872
AL133215.2	0.0311252	0.431811
AC130888.1	0.0311546	0.431743
C17orf80	0.031254	0.431515
AC005180.1	0.0312915	0.431428
TRAT1	0.031309	0.431388
MIR4474	0.031322	0.431358
COBL	0.0313718	0.431244
PGAM1P3	0.0314366	0.431096
FOXM1	0.0315106	0.430927
RNU6-26P	0.0315252	0.430893
KRBA2	0.0315285	0.430886
AC104836.1	0.0315928	0.430739
PPT2	0.0317244	0.43044
ZNF343	0.0318362	0.430186
MTND5P15	0.0318458	0.430164
BAZ1B	0.0318592	0.430134
RNU4-62P	0.0318977	0.430047
MYH3	0.0319488	0.429931
IRAK1BP1	0.0320041	0.429806
ITGA4	0.0320739	0.429649
SCRN3	0.0321576	0.429461
CR381653.2	0.0321785	0.429414
TMIGD2	0.0322179	0.429326
EBAG9P1	0.0323101	0.429119
CASP8AP2	0.0323226	0.429091
MRPL50	0.0323363	0.42906
MYO1A	0.0323688	0.428988
PPIAP4	0.0325298	0.428628
AC005520.5	0.0326591	0.428341
AC244452.1	0.0326659	0.428326
AP005482.3	0.0327091	0.42823
ACO1	0.0327245	0.428196
AC017076.1	0.0327775	0.428079
AC008119.1	0.032784	0.428064
AC005336.3	0.0327949	0.42804
G3BP1	0.0328289	0.427965
AC017083.3	0.0328577	0.427901
FOXO3B	0.0329255	0.427752
SNORA63C	0.0329417	0.427716
Z99129.3	0.0329604	0.427675
RGS9	0.0329686	0.427657
CHM	0.0329876	0.427615
HYI	0.03301	0.427565
DCK	0.0330746	0.427424
MUSTN1	0.0331928	0.427164
EEF1A1P24	0.033246	0.427048
AC108463.3	0.0332522	0.427034
CEP72	0.0332717	0.426992
AL359643.3	0.0333406	0.426841
ADAM3B	0.0333467	0.426828
NAPEPLD	0.0333751	0.426766
AL391684.1	0.0333865	0.426741
AC245884.10	0.0334194	0.426669
POLA2	0.0334217	0.426664
AC003002.2	0.0334762	0.426545
ING5	0.0335221	0.426445
AC097637.2	0.0335981	0.426281
FAM227B	0.0336489	0.42617
CENPF	0.0336763	0.426111
AC068213.1	0.0336772	0.426109
C22orf46	0.0337132	0.426031
TRIM5	0.033783	0.42588
MIR2467	0.0338051	0.425832
AC000068.1	0.0338696	0.425693
ARHGAP11B	0.0338781	0.425675
PAXIP1	0.033959	0.425501
NUDCD2	0.0340299	0.425348
AC108161.1	0.03405	0.425305
NPIPB13	0.0341133	0.425169
CALML4	0.0342124	0.424957
AP000897.1	0.0342319	0.424916
RNA5SP309	0.034287	0.424798
CPA4	0.0342973	0.424776
RPS24P16	0.034312	0.424744
ST20	0.0343326	0.4247
INIP	0.0344232	0.424507
AL137246.1	0.0344998	0.424344
MORN4	0.0345029	0.424338
CPA5	0.0345922	0.424149
AC079610.1	0.0345992	0.424134
PAAF1	0.0346445	0.424038
LINC02536	0.0346463	0.424034
TMEM69	0.0346621	0.424
LRRC69	0.0347043	0.423911
TMEM68	0.0347349	0.423846
ASPM	0.0347435	0.423828
ARMC9	0.0348004	0.423708
RN7SKP269	0.0348411	0.423622
SPAST	0.0348855	0.423529
MSH6	0.0349015	0.423495
AK8	0.0349198	0.423457
FCF1P5	0.0349571	0.423378
ZNRF2P2	0.0349654	0.423361
AP002026.1	0.0349719	0.423347
LRRIQ4	0.0349944	0.4233
HAUS1	0.0350096	0.423268
TUBD1	0.0350394	0.423205
TAS2R4	0.0350406	0.423203
CFAP44	0.0350573	0.423168
ESR1	0.0350834	0.423113
AL662907.2	0.0350901	0.423099
COX11	0.0350906	0.423098
BOLA2B	0.035139	0.422996
AC005154.1	0.0351665	0.422939
POLE2	0.0352274	0.422812
METTL8	0.0352825	0.422696
UBASH3A	0.0353136	0.422632
RBM28	0.0353633	0.422528
C1orf216	0.0354053	0.422441
RASSF8	0.035425	0.4224
PIGU	0.0354498	0.422348
MIR4526	0.0354961	0.422252
AL589765.1	0.0355232	0.422196
AC113398.1	0.0355755	0.422087
AL583856.2	0.0356382	0.421957
RF00588	0.0356422	0.421949
RTCA-AS1	0.0356534	0.421926
CR1	0.0356536	0.421925
AL596202.1	0.0356672	0.421897
PGBD1	0.0357289	0.42177
AL391058.1	0.035736	0.421755
RPS27AP1	0.0358882	0.421441
RFXAP	0.0358913	0.421435
ZNF573	0.0359536	0.421307
ZNF473	0.0359587	0.421296
NCAPD3	0.0359874	0.421237
CFAP36	0.0359949	0.421222
RNU6-125P	0.0360838	0.421039
TIGD4	0.0361022	0.421002
AL603825.1	0.0361026	0.421001
ST8SIA4	0.0361419	0.42092
EEA1	0.0363042	0.420589
MIR563	0.0363047	0.420588
AC010969.2	0.0363098	0.420577
APH1B	0.0363141	0.420568
RNA5SP474	0.0363609	0.420473
MLH1	0.0363859	0.420422
AC234582.2	0.0364222	0.420348
KLHDC10	0.0364962	0.420198
FAM161A	0.0365211	0.420147
COA5	0.0365546	0.420079
[truncated: 51,994 more rows]

## Sheet: AC247036.1
.id	p.value	R
AC247036.1	0	1
RHOT1P1	1.9833e-08	0.867504
AP005212.4	2.28663e-08	0.865749
MYT1L	5.40373e-08	0.854602
TCF7	7.12413e-08	0.850812
AC008498.1	7.79354e-08	0.849557
GRAP2	1.33257e-07	0.841825
ACVR2B	1.57556e-07	0.839323
LEF1	1.79709e-07	0.837328
ARHGEF9	2.04231e-07	0.835362
AC046130.2	3.03255e-07	0.829123
AC069257.2	3.33206e-07	0.827598
CD28	3.6969e-07	0.8259
AL135786.1	3.88661e-07	0.825075
MID1IP1-AS1	5.40652e-07	0.819527
AC107959.1	5.43116e-07	0.819449
LRP6	5.59518e-07	0.818939
UNC5CL	6.28767e-07	0.816925
CDRT4	8.08796e-07	0.812494
ZNF423	8.18147e-07	0.812289
AF241728.2	8.44373e-07	0.811725
LINC01934	8.48541e-07	0.811636
UBASH3A	1.05948e-06	0.807611
SLC4A8	1.11694e-06	0.806639
EPM2A	1.17387e-06	0.80572
ZNF704	1.32987e-06	0.803391
AL390728.2	1.70215e-06	0.798692
CDC25B	1.72234e-06	0.798464
SLFN5	1.76276e-06	0.798015
AC005324.3	1.8222e-06	0.797372
STXBP1	2.37134e-06	0.792181
AC245505.2	2.57111e-06	0.790558
GALNT6	2.75734e-06	0.789143
CR2	2.82273e-06	0.788666
AL157932.1	2.86974e-06	0.78833
MIR4533	3.35694e-06	0.785103
GAPDHP37	3.74603e-06	0.782814
RHPN1-AS1	4.29446e-06	0.779924
AC093390.2	4.34255e-06	0.779687
EEF1A1P24	4.59297e-06	0.778487
CGN	4.70448e-06	0.777971
TRIM16	4.73105e-06	0.77785
AC103563.7	4.80287e-06	0.777525
FCGBP	4.83261e-06	0.777392
AL662795.2	5.78725e-06	0.773462
ANKEF1	6.48287e-06	0.770947
SEPT1	6.54911e-06	0.77072
AC093157.1	6.73514e-06	0.770094
ANKRD20A5P	6.81018e-06	0.769846
RNU7-57P	7.13073e-06	0.768812
CYP4F35P	7.17457e-06	0.768674
LETM1	7.82439e-06	0.76671
LINC02634	8.08609e-06	0.76596
CCDC78	8.59464e-06	0.764562
PTMAP10	9.67516e-06	0.76182
LEAP2	9.86938e-06	0.761356
AC025539.1	9.94579e-06	0.761176
GSDMB	1.01499e-05	0.7607
AC012467.2	1.01876e-05	0.760613
AC090186.1	1.06115e-05	0.759656
CDK5RAP3	1.07812e-05	0.759282
KLRA1P	1.08209e-05	0.759195
DDX12P	1.13083e-05	0.758153
IL36A	1.37721e-05	0.753426
ZNF286A	1.42004e-05	0.752682
ZNF382	1.43762e-05	0.752383
AC009237.15	1.5268e-05	0.750911
RASA4CP	1.70207e-05	0.748229
AC104986.1	1.75348e-05	0.747489
GALNT2	1.763e-05	0.747354
SARDH	1.77495e-05	0.747185
AC009237.3	1.82178e-05	0.746535
PRKCQ-AS1	1.85188e-05	0.746124
AC009977.1	1.90368e-05	0.745431
AC141557.1	1.90817e-05	0.745372
PLEKHA8P1	1.93038e-05	0.745081
EZHIP	1.93167e-05	0.745064
PLA2R1	1.93691e-05	0.744996
NOTCH3	1.94541e-05	0.744885
PRB3	2.05328e-05	0.74352
MIR646HG	2.19957e-05	0.741767
ETV5	2.23601e-05	0.741347
LINC01046	2.27339e-05	0.740922
RHPN1	2.30064e-05	0.740616
LEF1-AS1	2.33367e-05	0.740249
LHFPL1	2.36053e-05	0.739954
RPL35AP18	2.39042e-05	0.73963
PXDN	2.62737e-05	0.737176
LINC00629	2.66276e-05	0.736827
TEKT3	2.73797e-05	0.736098
RNA5SP484	2.83248e-05	0.735206
AC107871.1	2.85836e-05	0.734967
SYNJ2BP	2.86965e-05	0.734863
PABPC1L	2.92747e-05	0.734336
PGAM1P5	2.95427e-05	0.734095
TRIM46	2.99356e-05	0.733745
AC005532.2	3.10828e-05	0.732747
IGHVIII-51-1	3.24061e-05	0.731635
R3HDM1	3.30794e-05	0.731084
ADSSL1	3.37859e-05	0.730517
AL592291.1	3.49089e-05	0.729637
AC005300.1	3.55731e-05	0.729128
PTPRK	3.57255e-05	0.729013
AC097637.2	3.77187e-05	0.72754
BTN2A3P	3.77649e-05	0.727506
ABCC5	3.80669e-05	0.72729
EFL1P1	3.9705e-05	0.726139
BCL11B	4.01753e-05	0.725816
GLRXP3	4.04834e-05	0.725607
LAT	4.09544e-05	0.725289
OBSCN	4.11647e-05	0.725148
C17orf51	4.174e-05	0.724766
CHRNA9	4.24122e-05	0.724326
AC068700.1	4.26435e-05	0.724176
HIVEP2	4.47743e-05	0.722826
AC005699.1	4.56795e-05	0.72227
MAP3K14-AS1	4.59874e-05	0.722083
AL139352.1	4.70572e-05	0.721441
ACTBP9	4.82029e-05	0.720768
ADNP-AS1	4.92821e-05	0.720148
ANTXRL	4.96801e-05	0.719922
AC064807.1	5.09876e-05	0.71919
AC139887.4	5.13055e-05	0.719015
TNRC6C	5.23602e-05	0.71844
HMGB1P19	5.48622e-05	0.717116
SDCBP2-AS1	5.6028e-05	0.716518
NEK7	5.71138e-05	0.71597
AC243562.2	5.7934e-05	0.715562
PAX8	5.87183e-05	0.715177
SLC35B4	5.88475e-05	0.715114
LINC02145	6.01445e-05	0.714488
ZNF397	6.07671e-05	0.714191
PAFAH1B1	6.10442e-05	0.714061
ZNF658B	6.25994e-05	0.713335
AL023806.4	6.30759e-05	0.713116
AC009533.1	6.30922e-05	0.713108
NINL	6.39765e-05	0.712705
LINC01134	6.49011e-05	0.71229
IGHVII-51-2	6.69788e-05	0.711374
DRP2	6.70832e-05	0.711328
N6AMT1	6.72395e-05	0.71126
AC005840.5	6.75651e-05	0.71112
FBXO25	7.40731e-05	0.708424
AC008033.3	7.49479e-05	0.708078
AC114744.1	7.54802e-05	0.707869
ZNF705E	7.71961e-05	0.707204
CYP2J2	7.81444e-05	0.706842
AC120053.1	7.86805e-05	0.706639
SMCO4	8.04179e-05	0.70599
LRRC38	8.05825e-05	0.705929
NR2C2	8.41357e-05	0.704641
RRH	8.62151e-05	0.703909
RTL8A	8.74533e-05	0.703481
HDAC4	8.74561e-05	0.70348
LINC02405	9.10859e-05	0.702254
ATP8B2	9.28581e-05	0.701671
DBH-AS1	9.43823e-05	0.701178
SDR42E1	9.48976e-05	0.701013
AL109615.4	9.7549e-05	0.700174
PAX8-AS1	9.971e-05	0.699506
AL357060.1	9.99976e-05	0.699418
AC006230.1	0.000102213	0.698747
AC092142.1	0.000102217	0.698746
ETS1	0.000102962	0.698523
MT1P1	0.000103014	0.698508
SLC11A2	0.000103251	0.698437
GALM	0.000104913	0.697947
C12orf66	0.000105889	0.697662
KRBA2	0.000108481	0.696917
CACFD1	0.000110114	0.696456
PCNX2	0.000110685	0.696295
MIR4457	0.000111963	0.69594
BTN3A3	0.000113168	0.695608
AL353796.1	0.000113795	0.695437
RNU6-316P	0.000115805	0.694893
AC092835.1	0.000116066	0.694823
IGHVIII-26-1	0.000116675	0.69466
GTF2H2C	0.000122512	0.693135
RNU6-26P	0.000122922	0.69303
SLC13A3	0.000123034	0.693002
AC078795.1	0.000123094	0.692987
LINC01284	0.000124074	0.692738
AC109631.1	0.000124188	0.692709
AC107071.1	0.000124574	0.692612
MSMB	0.000126857	0.692041
AC079385.2	0.000130974	0.691034
CCDC127	0.000132021	0.690783
GYG2	0.000138622	0.689236
ZBTB25	0.000138715	0.689214
AC132942.1	0.000140027	0.688915
AC005703.4	0.000140603	0.688784
DENND2D	0.000141262	0.688635
AL158055.1	0.0001426	0.688334
ATP8A2	0.000144976	0.687806
CDRT1	0.000145178	0.687762
TAS2R10	0.000148509	0.687035
KRT17P1	0.000150112	0.686691
TIA1	0.000150575	0.686592
TSTD3	0.000152338	0.686218
DCBLD2	0.000155156	0.685627
IGHVII-62-1	0.000155751	0.685504
DMWD	0.000155934	0.685466
IGHV3-52	0.000157293	0.685186
DLG3	0.000158963	0.684844
LINC02295	0.000161499	0.684332
RF00092	0.000165419	0.683553
SLIT1	0.000166814	0.68328
AP005212.2	0.000171668	0.682345
AC015813.6	0.000172084	0.682266
AC243562.1	0.000172101	0.682263
TPGS2	0.000172154	0.682253
LINC02273	0.000173752	0.681951
SLC23A1	0.000177795	0.681198
OSGEPL1	0.000182405	0.680357
MOSMO	0.000183471	0.680165
AC234781.1	0.000185081	0.679877
ABHD18	0.000186704	0.679589
ARSK	0.000187129	0.679514
PRELID3BP4	0.000187186	0.679504
GOLGA2P10	0.00018797	0.679366
TNFRSF8	0.000189408	0.679114
AC108058.1	0.000191065	0.678826
TCF12	0.000192405	0.678595
AC005034.4	0.000193303	0.67844
ATIC	0.000193497	0.678407
MIR503HG	0.000194364	0.678259
AC116353.1	0.000194578	0.678222
AC008555.1	0.000194845	0.678177
ABCA4	0.000194971	0.678155
ZNF670	0.000197009	0.67781
AC022916.1	0.000204911	0.6765
NUP50-DT	0.000208194	0.675969
LINC02527	0.000210188	0.67565
TESPA1	0.000214239	0.67501
GTF2IP23	0.000215623	0.674794
CAMK1D	0.000219274	0.674229
DSG2	0.000221414	0.673902
AL021154.1	0.000221729	0.673854
TRGV3	0.000226029	0.673205
RASGRP1	0.000226175	0.673184
COX10-AS1	0.000229474	0.672694
BCL9	0.00023038	0.67256
AC012020.1	0.000230391	0.672558
PLEKHH1	0.000231644	0.672375
RNF170	0.000239071	0.671302
FUT10	0.000242107	0.670872
CRYGS	0.000244551	0.67053
LRRC34	0.000244579	0.670526
THEMIS	0.000245147	0.670447
MIR646	0.000246327	0.670283
PLXNA3	0.000248568	0.669973
LINC00494	0.000248665	0.66996
MYH10	0.000249276	0.669876
MEGF11	0.000252619	0.669419
SPTAN1	0.000252991	0.669369
CORO2A	0.000253458	0.669306
AL133520.1	0.00025489	0.669113
ZHX2	0.00025646	0.668902
LY6G5C	0.000260822	0.668322
AC026495.2	0.000263161	0.668014
LINC02648	0.000263743	0.667938
ST13P5	0.000265565	0.667701
TRAV18	0.000266693	0.667555
MIR107	0.000274782	0.666521
PRKCQ	0.000278165	0.666097
AC013553.4	0.0002832	0.665474
AC245100.4	0.000286065	0.665124
PPIAP66	0.000288266	0.664856
GOLGA6L9	0.000292052	0.664401
ICK	0.000293902	0.664181
CNPY4	0.000294156	0.66415
SLC25A35	0.000295883	0.663946
AL360270.2	0.000300142	0.663445
AGBL2	0.000300517	0.663402
AC004231.3	0.000301136	0.66333
AC011997.1	0.000301389	0.6633
RANP4	0.000305524	0.662822
ST8SIA2	0.000305904	0.662778
ATP1A1-AS1	0.000313302	0.661938
LAX1	0.000317401	0.661479
SLC35B3	0.000321874	0.660985
AL356218.1	0.000329413	0.660165
BTN2A2	0.000331324	0.65996
CRACR2A	0.000332344	0.659851
FAM86B1	0.000339316	0.659113
BX321878.1	0.000340698	0.658968
C17orf75	0.00034806	0.658206
AC022400.6	0.000349834	0.658024
NDN	0.000350647	0.657941
BICD1	0.000352861	0.657716
AL356432.1	0.000356329	0.657366
IGHVIII-11-1	0.000358686	0.65713
AL356432.2	0.000359246	0.657074
AL035665.1	0.000366663	0.65634
AC055748.1	0.000368344	0.656175
AC012073.1	0.000371698	0.655849
GPR63	0.000372196	0.655801
AC073592.4	0.000375114	0.655519
AP001610.1	0.000375498	0.655482
AL049552.1	0.000381422	0.654917
RN7SL575P	0.000382904	0.654777
LINC02210	0.000383422	0.654728
AC026741.1	0.000391524	0.653971
GPR20	0.000395039	0.653647
ZNF226	0.000396038	0.653555
PAFAH2	0.000398421	0.653337
RCN1	0.000400907	0.653111
NCK1-DT	0.000404689	0.652769
PEX5	0.000405762	0.652673
TCFL5	0.000407817	0.652489
AL354712.1	0.000408927	0.65239
RPL10P19	0.000412599	0.652063
AC105180.2	0.00041272	0.652053
TRGV4	0.000414164	0.651925
DUSP19	0.000414411	0.651903
KIAA0753	0.000415411	0.651815
AL023693.1	0.000417562	0.651626
MAGOH3P	0.000422991	0.651154
ZNF470	0.000423292	0.651128
BBS12	0.000436784	0.649976
AL592148.3	0.000436969	0.64996
AQP3	0.000438564	0.649826
ZNF599	0.000438766	0.649809
AJUBA	0.000443954	0.649376
LINC00887	0.000447696	0.649067
OR4D1	0.000449854	0.648889
ANO8	0.000450501	0.648836
USP20	0.000453166	0.648618
LINC00467	0.00046079	0.648001
FP236383.2	0.000462555	0.647859
AC007092.1	0.000466353	0.647556
AL109628.1	0.000466353	0.647556
DNAH10OS	0.000466959	0.647508
POLH	0.000470483	0.647229
PITRM1-AS1	0.000470545	0.647224
EXOG	0.000475053	0.64687
TMEM26	0.000482182	0.646315
TP53RK	0.000483902	0.646182
MCTS1	0.000484068	0.64617
SUPT20H	0.000496369	0.645232
RAB3IP	0.000504993	0.644587
MAFTRR	0.000506585	0.64447
FBXO48	0.000507486	0.644403
TUBB8P1	0.0005102	0.644203
AC010538.1	0.000512711	0.644018
AC069218.1	0.000513583	0.643954
TRBJ2-4	0.000518932	0.643565
MIR378H	0.000518982	0.643561
CEP104	0.000524526	0.643161
ZNF33B	0.000533328	0.642533
KLF12	0.000533499	0.642521
LINC02166	0.000542662	0.641878
ANKRD20A21P	0.000545309	0.641693
OXSM	0.000555012	0.641025
IGHV7-27	0.000560212	0.64067
AL161729.4	0.000560874	0.640625
DBT	0.000564027	0.640412
KLHL32	0.000564954	0.64035
LDAH	0.000569581	0.640039
ACP6	0.000569847	0.640022
AL390961.1	0.000571476	0.639913
AC007406.5	0.00057698	0.639547
PITPNM2	0.000579863	0.639357
AC139887.1	0.000586016	0.638954
MYB	0.000586563	0.638918
ANKRD46	0.000591101	0.638623
CDH23	0.000594881	0.638379
OR10K2	0.000603089	0.637854
MIR572	0.000603829	0.637807
NCBP3	0.00060775	0.637558
OSBPL5	0.000610085	0.637411
GRK5	0.000616603	0.637002
AC130888.1	0.000628739	0.636251
RTL6	0.000629418	0.636209
NSD3	0.000629605	0.636197
NEK9	0.000638176	0.635675
AL353763.1	0.000639669	0.635585
MYCBP2-AS1	0.000641975	0.635445
PABPC1P7	0.000657179	0.634538
AMDHD1	0.000661307	0.634295
GRK3	0.000666721	0.633978
MIR4304	0.000669963	0.633789
MARCH9	0.000674349	0.633535
PTCD2	0.000674964	0.633499
FXYD2	0.000675537	0.633466
AC004847.1	0.000681014	0.633151
AC026362.2	0.000682367	0.633074
AC091178.2	0.000684923	0.632928
AL049697.1	0.000685188	0.632913
PKIA	0.000685565	0.632892
AC093323.1	0.000686711	0.632826
NSD2	0.000688814	0.632707
DPH5	0.000691472	0.632556
DGKA	0.00069557	0.632325
AL138781.2	0.000695744	0.632315
CBX1P2	0.000700041	0.632074
CLCN2	0.000702666	0.631928
AC022784.5	0.000708738	0.631591
RNA5SP69	0.000713624	0.631321
AC095057.3	0.000715434	0.631222
AL049776.1	0.000719763	0.630985
RPS26P45	0.00071999	0.630972
HIF1AN	0.000723266	0.630794
AC007381.1	0.000723405	0.630786
AL162731.1	0.000734738	0.630174
IGHVII-33-1	0.00074024	0.62988
AC003071.1	0.000741617	0.629807
PLEKHA8	0.000744848	0.629635
ZFP62	0.000745271	0.629613
AC022018.1	0.000747861	0.629476
BCORP1	0.000753155	0.629197
AIFM2	0.000758941	0.628894
LPCAT1	0.00076515	0.628571
LINC01771	0.000767425	0.628454
HNRNPLL	0.000767941	0.628427
AL163932.1	0.000768713	0.628387
BEND3	0.00076921	0.628362
AC048351.1	0.000770093	0.628316
U47924.3	0.000781662	0.627724
ROR1	0.00078577	0.627516
STK32C	0.000789898	0.627307
DMPK	0.000790679	0.627268
PRR4	0.000793411	0.627131
AC128709.2	0.000796279	0.626987
STAT5B	0.000799015	0.62685
C14orf93	0.000803104	0.626647
MIR7152	0.000805816	0.626512
ZNF137P	0.000808941	0.626358
VAPB	0.000810393	0.626286
KCNA2	0.000815627	0.626029
AL139246.1	0.000816984	0.625962
RNU6-759P	0.000818551	0.625886
PRSS27	0.000819829	0.625823
LINC02536	0.000822619	0.625687
AC109449.1	0.000827105	0.62547
ZNF512	0.00082841	0.625406
TTC16	0.000828701	0.625392
THEM7P	0.00083533	0.625073
OLFM2	0.000840513	0.624825
MAGI3	0.000840926	0.624805
STX17	0.000844728	0.624624
RNA5SP307	0.000846739	0.624529
SEPT2P1	0.000854952	0.62414
AC090607.2	0.000856553	0.624065
AC026336.4	0.000858504	0.623974
RNU4-85P	0.000867452	0.623556
KIAA1958	0.000868454	0.62351
ATP1B3-AS1	0.000876256	0.623149
AC012653.1	0.00088253	0.622861
FAM120C	0.000884813	0.622756
SIDT1-AS1	0.000888177	0.622603
UBP1	0.000891531	0.62245
SMAD4	0.000895479	0.622271
LINC00365	0.000896154	0.622241
AL449423.1	0.000911335	0.62156
TNFAIP8	0.000911866	0.621536
ZNF546	0.000914072	0.621438
AC244034.2	0.000919535	0.621196
CACNB2	0.000920321	0.621162
WBP2NL	0.000936629	0.620447
ZNF519	0.000939443	0.620325
AC099568.2	0.000940039	0.620299
ZNF77	0.000942701	0.620184
ZNF780B	0.000949044	0.61991
MIR3125	0.000951837	0.61979
AC073592.2	0.000954868	0.61966
BCRP1	0.000964072	0.619268
LINC00243	0.000966942	0.619147
SMARCAL1	0.000972027	0.618932
RPL10P4	0.000975285	0.618795
PSMG3-AS1	0.000975829	0.618772
HHIP	0.000977682	0.618694
PLCG1-AS1	0.00098626	0.618336
SLC25A42	0.000995081	0.617971
CCNI2	0.00100797	0.617442
NMT2	0.00101453	0.617175
HSDL1	0.00101641	0.617098
METRN	0.00101966	0.616967
TRAT1	0.00102029	0.616942
LINC00427	0.00102322	0.616823
TARDBPP2	0.00102525	0.616742
AC084876.1	0.00103678	0.61628
ENPP7P11	0.00104771	0.615846
FAM238B	0.0010486	0.615811
MEAK7	0.00105673	0.615491
AC020550.2	0.00106132	0.615312
HAGHL	0.00106381	0.615215
MIR548AG2	0.00106446	0.615189
CYP2U1	0.00107031	0.614962
NT5DC2	0.00107835	0.614652
AP000911.2	0.00108523	0.614387
LINC00858	0.00108852	0.614261
AC074029.3	0.00109117	0.61416
AKAP3	0.00110137	0.613773
GOLGA3	0.00110465	0.613649
RPAP2	0.00110773	0.613533
PKNOX1	0.00111201	0.613372
UMPS	0.00111402	0.613297
AC119428.3	0.00112727	0.612803
AC090206.1	0.00112738	0.612799
RPL26P6	0.00113367	0.612567
RPL3P3	0.00115137	0.611918
PUS10	0.00115986	0.61161
FAM86B2	0.00116078	0.611576
MTA3	0.00116333	0.611484
RPL13P6	0.00116553	0.611405
PLCH1	0.00116637	0.611375
PTK7	0.00117484	0.611071
MROH8	0.00117544	0.61105
AC209007.1	0.0011758	0.611037
LDB3	0.00117798	0.610959
PI16	0.00118014	0.610882
CR769775.2	0.00118078	0.610859
ARHGEF4	0.00118709	0.610635
ADAM33	0.00118808	0.6106
AC007485.2	0.00119008	0.610529
AC010761.6	0.00119009	0.610529
PCNX4	0.00119153	0.610478
IPP	0.00119234	0.610449
UBAP1L	0.00119527	0.610346
RPL3P12	0.0012019	0.610112
ZC3H6	0.00120958	0.609844
AC091849.2	0.0012127	0.609735
AP5S1	0.00121401	0.60969
ZNF48	0.00121454	0.609671
SRP14-AS1	0.00121497	0.609656
SYNRG	0.0012252	0.609302
AC073370.1	0.00122627	0.609265
MAL	0.00122672	0.609249
AC005262.2	0.00123281	0.60904
RIC8B	0.0012347	0.608975
AC104984.4	0.00125122	0.608412
AL356599.1	0.00125387	0.608322
RCSD1	0.00126	0.608115
LINC01355	0.00126841	0.607833
AC109454.4	0.0012703	0.60777
KRT8P12	0.00127075	0.607754
AL136382.1	0.00127369	0.607656
RFX5	0.00127506	0.607611
TRIB2	0.00127506	0.607611
AL513534.1	0.00128423	0.607306
TH2LCRR	0.00128994	0.607117
RNU6-945P	0.00129651	0.606901
C15orf40	0.00129886	0.606824
AC079385.1	0.00130024	0.606778
ASB1	0.00130514	0.606618
MIR4682	0.00130933	0.606481
COL6A4P2	0.00131137	0.606415
SAP30L-AS1	0.0013143	0.606319
AL359922.2	0.00132123	0.606095
HCG18	0.00132848	0.605861
TAS2R6P	0.00133256	0.60573
AL592435.1	0.00133591	0.605622
TAS2R4	0.00133696	0.605589
TXLNGY	0.00134053	0.605475
BRICD5	0.00134469	0.605342
DND1P1	0.00136207	0.604792
ARMC12	0.00137721	0.604317
AC034236.3	0.00138136	0.604187
AL589765.6	0.00138163	0.604179
TSC1	0.00139327	0.603818
MRTFB	0.00140179	0.603555
AL627095.1	0.00140861	0.603346
RFX3-AS1	0.00141117	0.603268
TMEM254-AS1	0.00141256	0.603225
AC007842.1	0.00141674	0.603098
ARMCX5-GPRASP2	0.00142002	0.602998
NUDT10	0.00142478	0.602854
RDH16	0.00142703	0.602786
LIG4	0.00143053	0.60268
AJ239328.1	0.00143316	0.6026
ACER2	0.00143635	0.602504
MIR4526	0.00143839	0.602443
ITGB6	0.00144359	0.602287
AC012254.1	0.00145102	0.602065
PTCD1	0.00145754	0.601871
GTF2IP14	0.00145916	0.601823
AL662907.2	0.00146095	0.601769
AC126544.1	0.00146105	0.601766
AC018809.2	0.00146267	0.601719
MIR503	0.00147168	0.601452
AL136531.1	0.00147566	0.601335
AL139021.2	0.00147581	0.601331
IRAK4	0.00147922	0.601231
ZNF346	0.00148106	0.601176
RN7SKP86	0.00148388	0.601094
MRPS5	0.00148572	0.60104
AC018445.1	0.00148775	0.600981
GPRASP2	0.00149047	0.600901
ADAM3B	0.00149776	0.600689
AC021483.2	0.00149809	0.600679
VAT1	0.0015029	0.60054
AL034550.2	0.00150292	0.60054
SLX4IP	0.00150632	0.600441
AC104996.2	0.00151206	0.600276
DHRS4-AS1	0.00151421	0.600214
AC005019.1	0.00151801	0.600104
AC010970.1	0.00152027	0.60004
MAGI1	0.00152077	0.600025
TFCP2	0.00152085	0.600023
HRK	0.00153181	0.59971
CHM	0.00153566	0.5996
AP000897.2	0.00153728	0.599554
C15orf62	0.00154098	0.599449
MYO1A	0.00154453	0.599349
ZC2HC1C	0.00155182	0.599143
RPS12P16	0.00155205	0.599137
NCAPD2	0.00156324	0.598823
ARL5AP4	0.00156811	0.598687
CROCCP3	0.00158411	0.598242
RAB15	0.00160328	0.597714
ETNK1	0.00160807	0.597583
AL604028.1	0.0016108	0.597509
RBM41	0.00162309	0.597175
CYP2R1	0.00163548	0.59684
SLC35G3	0.0016422	0.596659
LINC02367	0.0016546	0.596328
AC106799.2	0.00166117	0.596153
ANTXRLP1	0.0016615	0.596144
RPSAP63	0.00167191	0.595868
PPIAP74	0.00167494	0.595788
AC006043.1	0.00167494	0.595788
AC126120.1	0.00167494	0.595788
KCTD1	0.00167502	0.595786
LINC00430	0.00168131	0.59562
IGHVII-30-1	0.00168221	0.595597
PAWR	0.001688	0.595445
RBM12	0.00169565	0.595245
SLC23A3	0.0016988	0.595163
LINC00165	0.00170983	0.594876
RN7SL629P	0.00171046	0.59486
IGHVII-26-2	0.00171591	0.594718
AL731702.1	0.00173128	0.594323
CTC1	0.00173166	0.594313
TSPOAP1-AS1	0.00173765	0.59416
LINC00987	0.00174796	0.593897
RDM1P5	0.00174978	0.593851
SALL2	0.00175756	0.593653
CD247	0.00176238	0.593531
AC091516.1	0.00176397	0.593491
OR4N3P	0.00177159	0.593299
ZNF287	0.0017743	0.593231
SLC6A16	0.00179165	0.592797
AC087222.1	0.00180145	0.592554
ZNF720	0.00180501	0.592466
LINC00641	0.00180924	0.592361
ENOX2	0.00181822	0.59214
ZNF559-ZNF177	0.00182045	0.592085
AC069454.1	0.00182219	0.592042
AC007952.9	0.00182596	0.59195
RNU6-853P	0.00183154	0.591813
FP671120.7	0.00183419	0.591749
RNU4-13P	0.00183419	0.591749
IGHV3-33-2	0.0018368	0.591685
CDHR2	0.0018423	0.591551
JAKMIP1	0.00184286	0.591537
CD84	0.00184794	0.591414
AC087645.2	0.00185236	0.591307
RPS17P5	0.00185639	0.59121
AC007952.5	0.00190635	0.590017
AC069154.1	0.00191222	0.589878
ZNF683	0.00191785	0.589746
RUNX1	0.00191845	0.589732
AC026979.4	0.0019223	0.589641
TRBJ2-6	0.00193315	0.589387
IRS1	0.00193782	0.589279
AC025176.1	0.00194402	0.589134
AC087612.1	0.00194528	0.589105
AL121906.2	0.00196684	0.588607
LEO1	0.00197078	0.588517
AL390728.1	0.00198991	0.588079
AC025175.1	0.00199205	0.588031
SLAMF6	0.001994	0.587986
VN1R20P	0.00199515	0.58796
USP49	0.00199751	0.587907
CORO6	0.00200566	0.587722
ZACNP1	0.00200666	0.5877
ZNF30	0.00201192	0.587581
ABI2	0.00201636	0.587481
AC015804.1	0.0020318	0.587134
RPS4XP16	0.00203287	0.58711
MFGE8	0.0020403	0.586945
GTF2E1	0.002042	0.586907
LINC00273	0.00204221	0.586902
ZNF630-AS1	0.00205081	0.586711
TMEM198B	0.00205415	0.586637
SETD5	0.00205445	0.58663
TMCO5B	0.00205689	0.586576
PLXNA1	0.00206027	0.586502
ASIC1	0.00206252	0.586452
NPIPB7	0.00207067	0.586272
HMGN1P26	0.00208402	0.585979
PIK3R3	0.00209773	0.58568
AC117402.1	0.00209872	0.585659
AC007687.1	0.00210708	0.585477
PPP3CB	0.00211445	0.585318
AC093297.2	0.00211454	0.585316
S1PR1	0.00211858	0.585229
GAPDHP35	0.00212404	0.585111
MIR5190	0.00212622	0.585064
MIR4697HG	0.00213335	0.584911
LINC01089	0.00213362	0.584905
SNTB2	0.00214624	0.584635
ACKR3	0.00215327	0.584485
AC007681.1	0.00216351	0.584268
SCN7A	0.00217326	0.584062
AC063943.1	0.0021745	0.584035
C9orf147	0.00220982	0.583295
PLEKHG2	0.00221202	0.583249
AL162274.2	0.0022174	0.583138
AC096664.2	0.00222463	0.582988
SNX19P1	0.00222566	0.582967
AP003469.4	0.00222651	0.582949
DICER1-AS1	0.0022269	0.582941
FGF11	0.00223098	0.582857
DHFR2	0.00223148	0.582846
AC008659.1	0.00223784	0.582715
GEMIN8	0.00224364	0.582596
AC067838.1	0.00224456	0.582577
L2HGDH	0.00224669	0.582533
AC022098.1	0.00226625	0.582133
DAP3P1	0.00226776	0.582103
CAB39L	0.00226984	0.58206
AC026412.1	0.00227429	0.58197
AL592164.1	0.00228327	0.581788
ZNF225	0.00230564	0.581337
ZSCAN30	0.00230942	0.581261
STAMBP	0.00232772	0.580896
PYROXD2	0.00234758	0.580502
AC068213.1	0.00235041	0.580446
SBK1	0.00235262	0.580402
CALML4	0.00235356	0.580384
SOX13	0.00235832	0.58029
SF3B3	0.00236095	0.580238
ZNF670-ZNF695	0.00236111	0.580235
AL365440.2	0.00236374	0.580183
AL365434.1	0.00237093	0.580042
AC026436.1	0.0023764	0.579935
SEPT8	0.00237997	0.579865
AC233964.1	0.00238059	0.579853
TRMT10B	0.0023809	0.579847
PAX9	0.00238901	0.579689
CDKN2B-AS1	0.0023919	0.579633
AC009107.2	0.00240375	0.579403
HSD17B7P2	0.00241861	0.579116
LINC02033	0.00242874	0.57892
RTKN2	0.00243579	0.578785
ZP1	0.00244019	0.578701
USP44	0.00244648	0.578581
RNU11-6P	0.00246175	0.578291
CEP63	0.00246715	0.578188
AC138866.1	0.00247185	0.578099
AC114956.3	0.00247531	0.578034
AC011450.1	0.00248707	0.577812
SHISA2	0.00249224	0.577715
PANK1	0.00249513	0.57766
TBC1D26	0.00250836	0.577413
AL354694.1	0.00251924	0.57721
MSH5	0.00253674	0.576885
AC092437.1	0.00254168	0.576794
PHF7	0.00254967	0.576646
SMYD4	0.00255613	0.576528
ZC4H2	0.00257603	0.576163
SLC16A1-AS1	0.00257816	0.576124
LINC00426	0.00257935	0.576102
RNPS1P1	0.00258278	0.57604
AC096642.1	0.00258606	0.57598
AC112721.2	0.00258661	0.57597
WDR92	0.00258798	0.575945
TRIM5	0.00259015	0.575906
IGHVII-28-1	0.00259175	0.575877
KDM4A-AS1	0.00259413	0.575833
AC024580.1	0.00260097	0.57571
AC079612.1	0.00260418	0.575651
POLR2KP2	0.00261436	0.575468
ATP2C2-AS1	0.00261788	0.575404
NHLRC3	0.00262985	0.575189
IGHV1-69	0.00263219	0.575147
AC016687.1	0.00264355	0.574944
AC007666.2	0.00266546	0.574554
KLHDC4	0.00267029	0.574468
AC084018.3	0.00267077	0.57446
TRIM66	0.0026867	0.574178
MFSD8	0.00268871	0.574143
CCDC85C	0.00269138	0.574096
SCLY	0.00269251	0.574076
LAMP3	0.00269925	0.573958
BCL7A	0.00269979	0.573948
IL17B	0.00270286	0.573894
LRIG2	0.00270404	0.573874
AL133475.1	0.00271324	0.573713
ENPP7P14	0.00273014	0.573418
DNAH17-AS1	0.00273073	0.573408
AL356000.1	0.00273908	0.573263
AC144450.1	0.00274951	0.573082
BBIP1	0.00275409	0.573003
MIR3157	0.00275761	0.572943
FAM149B1	0.00280056	0.572207
CEP250	0.00282919	0.571723
TRIM41	0.00284501	0.571457
HSPA8P5	0.00284521	0.571453
FRA10AC1	0.00286298	0.571156
MMP25-AS1	0.00286553	0.571113
CCDC114	0.00286651	0.571097
CCNT2-AS1	0.00288046	0.570865
AC012213.3	0.00291818	0.570242
AL078621.4	0.00291855	0.570236
AL023973.1	0.00294351	0.569828
AL031679.1	0.00295548	0.569633
AC099677.1	0.00296448	0.569487
CAPRIN2	0.00296558	0.569469
EIF3EP1	0.0029671	0.569444
ZNF658	0.00297372	0.569337
AC092685.1	0.00298011	0.569234
AC104117.4	0.00298678	0.569127
PRRT2	0.00298919	0.569088
AC092953.2	0.00299245	0.569035
ZNF75A	0.00300208	0.568881
KCNJ1	0.00300616	0.568815
PMS2	0.00301719	0.568639
TTLL4	0.00302857	0.568458
ARRDC5	0.00303304	0.568387
EPB41L5	0.00303876	0.568296
AC022893.1	0.00304821	0.568146
C10orf88	0.00304981	0.568121
AL513218.1	0.00305978	0.567963
AL035530.2	0.00306647	0.567858
AP003354.1	0.00308883	0.567507
AC110285.6	0.00309825	0.56736
FAM114A2	0.0031016	0.567307
AC000068.2	0.00310162	0.567307
IFT80	0.00310285	0.567288
ANKRD17	0.00310914	0.56719
LCK	0.00311522	0.567095
AC012254.5	0.00312913	0.56688
VANGL1	0.00313113	0.566849
AC084757.4	0.00313171	0.56684
AC093724.3	0.00313968	0.566717
MIR548I2	0.00314185	0.566683
AL627230.1	0.00314868	0.566578
LINC01730	0.00315622	0.566462
MIR3135A	0.00315935	0.566414
PARD3	0.00318294	0.566053
GOLGA2P7	0.00320252	0.565755
ADAT1	0.00320876	0.565661
AC091564.1	0.00321523	0.565563
LINC00954	0.00321637	0.565545
AC011893.1	0.00321885	0.565508
AC005034.6	0.00322161	0.565466
AC103563.9	0.00322789	0.565371
CD1B	0.0032296	0.565346
AC073585.1	0.00323654	0.565241
DDX17	0.00323917	0.565202
RPS2P6	0.00324027	0.565185
KCNS3	0.00324078	0.565178
ENPP7P5	0.00325286	0.564996
SNAPC3	0.00325313	0.564992
RTL8C	0.00325739	0.564929
AC138655.1	0.00326401	0.56483
AC019205.1	0.00326971	0.564745
THRAP3	0.00327244	0.564704
AL158151.4	0.003283	0.564547
PIP	0.0032867	0.564492
TRMT13	0.00328979	0.564446
FAM66D	0.00329586	0.564356
AC092375.2	0.00330181	0.564268
KCNQ4	0.00331993	0.564001
LINC01891	0.00332493	0.563927
AL683813.1	0.00336206	0.563384
STK31	0.0033661	0.563325
CCDC92	0.00337629	0.563177
AC095057.4	0.00338033	0.563119
CCDC191	0.00338153	0.563101
AC073073.2	0.0033918	0.562953
SRY	0.00340683	0.562736
METTL4	0.00342114	0.56253
LINC01228	0.00342144	0.562526
SNX1	0.00342632	0.562456
AC002550.2	0.0034285	0.562425
AC234782.3	0.00343464	0.562337
VN1R42P	0.00343826	0.562285
RN7SKP291	0.00343926	0.562271
TMOD2	0.00344686	0.562162
RNA5SP532	0.0034508	0.562106
ST8SIA1	0.0034573	0.562014
ZNF302	0.00346834	0.561857
NMRK1	0.00347171	0.561809
RMDN1	0.0034799	0.561693
AP000711.1	0.00348335	0.561644
AL606495.1	0.00349016	0.561548
PANK4	0.00349049	0.561544
SCML2	0.00349223	0.561519
TICRR	0.00350042	0.561404
NDUFA6-DT	0.00352276	0.56109
AC091564.5	0.0035255	0.561052
B3GNT10	0.00355752	0.560606
RNU6-858P	0.00356523	0.560499
AL359232.1	0.00358184	0.560269
RAP1GAP	0.00358694	0.560199
NOXRED1	0.00359139	0.560137
PAPOLG	0.0035935	0.560109
KRT1	0.00360955	0.559888
UBE2Q2P2	0.00362452	0.559683
MAGI2	0.00364397	0.559418
OR2B8P	0.00366062	0.559192
LINC01163	0.0036855	0.558856
AC093899.1	0.00368578	0.558852
AC010132.4	0.00369408	0.55874
RPS23P1	0.00369589	0.558716
EXTL2	0.00369808	0.558687
ZNF691	0.00369848	0.558681
ST8SIA4	0.0037005	0.558654
DGUOK-AS1	0.00373031	0.558256
MRPS14	0.00373584	0.558182
SLC16A10	0.00374044	0.558121
AC021504.1	0.00375079	0.557983
HCG17	0.00375368	0.557945
SYT7	0.00376315	0.557819
AC027682.3	0.00376382	0.55781
MIR600HG	0.00376744	0.557763
AC103974.1	0.00376993	0.55773
RN7SKP44	0.00377286	0.557691
AC009486.2	0.00377923	0.557607
AC024560.4	0.00378242	0.557565
LINC01801	0.00378318	0.557555
EEF1A1P1	0.00378804	0.557491
RNA5SP217	0.00379743	0.557367
AL354696.2	0.00379761	0.557365
SIDT1	0.00380152	0.557314
ATG2B	0.00381087	0.557191
APPBP2	0.00382017	0.557069
ANOS2P	0.00382814	0.556966
FAM66B	0.00382886	0.556956
AC012309.2	0.00384563	0.556738
ZC3H8	0.00384735	0.556715
LINC02129	0.00384973	0.556685
RFX3	0.00386383	0.556502
DNAJB13	0.00387661	0.556337
CIAPIN1P	0.00389436	0.556108
AC016168.1	0.00389496	0.5561
AC007314.1	0.00390724	0.555943
ZNF616	0.00391493	0.555844
MIR298	0.00392705	0.555689
ZFYVE9	0.00393082	0.555641
AC016526.3	0.00393222	0.555623
AC104073.3	0.0039373	0.555558
AL022342.1	0.00394965	0.555401
AL512283.2	0.00395442	0.555341
Z82243.1	0.00395719	0.555306
LRIT3	0.00395785	0.555297
CDHR1	0.0039856	0.554947
HPDL	0.0039873	0.554925
PCDH10	0.0039904	0.554886
UQCC1	0.00399635	0.554811
AC241952.1	0.00400752	0.554671
AC091057.1	0.00401434	0.554585
AC004076.2	0.00401543	0.554572
CARF	0.00401756	0.554545
ST18	0.004035	0.554327
TRIM9	0.00404696	0.554178
AC007100.2	0.00405228	0.554112
AL121890.4	0.00406118	0.554001
AC234783.1	0.00409614	0.553569
GFRA4	0.0041186	0.553293
AC013652.2	0.00412344	0.553234
LINC00310	0.00413838	0.553051
AC024940.2	0.00414077	0.553022
SLC30A7	0.00415275	0.552876
AC068790.7	0.00415452	0.552854
PRXL2B	0.00416097	0.552776
LINC01342	0.00416212	0.552762
TMIGD2	0.00418413	0.552495
TYSND1	0.00419799	0.552328
AC018761.3	0.00420511	0.552242
PRMT6	0.00421019	0.55218
EDEM3	0.00423209	0.551918
OR10T2	0.00423237	0.551914
DCHS1	0.00423715	0.551857
KIF3A	0.00424117	0.551809
AC097662.1	0.00427294	0.55143
FITM2	0.0042954	0.551164
AL353691.2	0.00429827	0.55113
AC092641.1	0.00434404	0.550591
AC134878.2	0.00435753	0.550433
AC084855.2	0.00436654	0.550328
AL359704.1	0.00436794	0.550311
ZNF260	0.00439141	0.550038
FRG1BP	0.00439246	0.550026
AC026356.1	0.00440922	0.549832
KRI1	0.0044231	0.549671
FSTL1	0.00445083	0.549352
MRPS18CP6	0.00448948	0.54891
ZNF234	0.00451936	0.54857
HSPA8P11	0.0045316	0.548432
AL136087.1	0.00454297	0.548303
RNU4-14P	0.00454582	0.548271
AC020612.1	0.00455495	0.548168
AL627308.1	0.00455648	0.548151
AC004263.2	0.00456802	0.548021
TP73-AS1	0.00459075	0.547766
PNMA8A	0.00459141	0.547759
CEP126	0.00462389	0.547397
MFSD9	0.00463016	0.547327
FKTN	0.00464331	0.547181
AL590822.3	0.0046619	0.546975
PALLD	0.0046646	0.546946
CASC15	0.00467644	0.546815
CHST2	0.0047098	0.546449
IGHV3-71	0.0047197	0.546341
MYB-AS1	0.00474064	0.546112
MAP1A	0.00474428	0.546073
FBXO38	0.00475302	0.545978
FGFR1	0.00475706	0.545934
AC104850.1	0.00476003	0.545901
CYCSP51	0.00476724	0.545823
DLEC1P1	0.00476724	0.545823
RNU6-601P	0.00476724	0.545823
AC007652.3	0.00476724	0.545823
AC022916.2	0.00476724	0.545823
RNU2-46P	0.0047731	0.54576
LIX1L	0.00478174	0.545666
AC011447.3	0.00478827	0.545596
OR9A3P	0.00479345	0.54554
PPIEL	0.00479389	0.545535
AC110751.1	0.00479606	0.545512
DLGAP4-AS1	0.00480756	0.545388
GPR153	0.00481917	0.545263
GOT2P3	0.00482492	0.545201
AC007996.1	0.0048367	0.545075
GABRR2	0.00484134	0.545026
EIF4A1P9	0.00485607	0.544868
CLCN3	0.00485872	0.54484
AC007876.1	0.00486493	0.544774
RNA5SP64	0.00486703	0.544751
PPEF2	0.00486952	0.544725
AC068418.3	0.00488692	0.54454
FSD1	0.00488969	0.544511
FAM215B	0.00489681	0.544435
LINC01829	0.00490938	0.544302
AC093788.1	0.00491732	0.544218
TRIM35	0.00491888	0.544202
C9orf24	0.0049193	0.544197
C11orf95	0.00492833	0.544102
TRBV7-1	0.00493196	0.544064
AC079780.1	0.00493647	0.544016
AL035252.2	0.00493802	0.544
AC105219.1	0.00494027	0.543976
NIPAL1	0.00494609	0.543915
LCT	0.00494943	0.54388
PRKCG	0.00495572	0.543814
ZNF415	0.0049563	0.543808
FRG1EP	0.00495858	0.543784
TBC1D31	0.00496039	0.543765
FAM122B	0.00496755	0.54369
PFKFB1	0.00497407	0.543622
CUBN	0.00498013	0.543559
WIPF1	0.00498978	0.543458
MAPKAPK5	0.0050196	0.543148
POLR3A	0.00502189	0.543124
ZFYVE21	0.00502299	0.543113
AL035252.3	0.00503308	0.543008
AC092967.1	0.00503834	0.542954
LINC01547	0.0050423	0.542913
MTCO2P29	0.00506067	0.542723
TMEM161B-AS1	0.00508136	0.54251
NECAB3	0.00509363	0.542385
TMEM98	0.00509861	0.542333
AC022432.1	0.0051404	0.541907
DNHD1	0.00515113	0.541798
MAPRE1P3	0.0051546	0.541763
SLC9A2	0.00516546	0.541653
GAL3ST3	0.00516958	0.541611
AL096701.3	0.00518755	0.541429
HNRNPA1P41	0.00518855	0.541419
AC245100.7	0.00522351	0.541068
TBCCD1	0.00522623	0.54104
RPL7P45	0.00523237	0.540979
AC099066.3	0.00524634	0.540839
AL158212.3	0.00524682	0.540834
AC114490.1	0.00528181	0.540485
SEMA4F	0.00528227	0.540481
LINC01366	0.00528931	0.540411
AL137009.1	0.00529084	0.540396
RF00056	0.00529886	0.540316
C2orf68	0.00530094	0.540296
IWS1	0.00530921	0.540214
PRRT3-AS1	0.00532137	0.540093
AC073210.1	0.00532157	0.540091
ANKRD39	0.00532717	0.540036
AL354743.2	0.00536324	0.539681
BCDIN3D-AS1	0.00536468	0.539667
ZNF90	0.00537768	0.53954
AGER	0.00538134	0.539504
AL512328.1	0.00539628	0.539358
MTCO1P2	0.00541014	0.539223
AL021308.1	0.00541233	0.539201
RPL34-AS1	0.00541279	0.539197
TPI1P3	0.00542208	0.539107
ERCC4	0.00543882	0.538944
AL132780.4	0.00543918	0.53894
IRAK1BP1	0.00546143	0.538725
AC026356.2	0.00546405	0.5387
REXO4	0.00546871	0.538655
AC138035.1	0.00550622	0.538294
ZKSCAN1	0.00551733	0.538187
SCARA5	0.00553352	0.538032
METTL21EP	0.00553447	0.538023
SVIL2P	0.0055419	0.537952
MOCS1	0.00554605	0.537913
SLFN11	0.00555116	0.537864
ZBTB42	0.00558809	0.537513
CACNA1H	0.00559141	0.537481
TRBJ2-3	0.00560365	0.537365
HOMER1	0.00564861	0.536942
SLC25A15	0.00565617	0.536871
AL133215.3	0.00568772	0.536575
TRAF3IP2	0.00569859	0.536474
MIR6835	0.00572971	0.536184
PHC1	0.00573921	0.536096
RPL18P11	0.00576016	0.535902
RALGPS1	0.00576286	0.535877
NUDT9	0.00577614	0.535755
AC005831.1	0.00577852	0.535733
NAPEPLD	0.00578568	0.535667
ZNF33A	0.00579687	0.535564
CELF2-AS1	0.00583349	0.535228
CACNB1	0.00585139	0.535065
CD47	0.00587305	0.534868
WDR86	0.00587995	0.534805
AC008875.1	0.00588992	0.534715
AC119673.2	0.00590146	0.53461
GEMIN6	0.00590207	0.534605
GLB1L3	0.00591113	0.534522
Z97989.1	0.00591874	0.534454
COX18	0.00592036	0.534439
AC020594.1	0.005922	0.534424
AC007262.1	0.00592739	0.534376
SLAIN1	0.00593931	0.534268
AC122134.1	0.00595931	0.534088
AP005131.6	0.00597147	0.533979
AL078612.2	0.00598359	0.533871
TPRXL	0.0059895	0.533818
RPL23AP20	0.0060013	0.533712
BMS1P1	0.00600612	0.533669
EFCAB5	0.00602574	0.533494
MIR542	0.00602825	0.533472
AC005534.2	0.00603206	0.533438
LINC00221	0.00603266	0.533433
AC093510.2	0.0060526	0.533256
SLC16A6P1	0.0060629	0.533165
OR10T1P	0.00606543	0.533142
AC138956.1	0.0060747	0.53306
SKAP1	0.00609612	0.532871
SCN3A	0.00609643	0.532869
PLEKHH2	0.00609705	0.532863
AC105383.1	0.00609915	0.532845
AL158206.1	0.00610192	0.53282
LINC02611	0.00612308	0.532634
AC005154.4	0.0061252	0.532616
TPO	0.0061551	0.532354
AL445231.1	0.00615658	0.532341
AC092939.1	0.0061787	0.532148
AL583805.1	0.0061846	0.532096
MLLT6	0.0062272	0.531727
SMARCAD1	0.0062312	0.531692
AC013564.1	0.00624426	0.531579
PKMP3	0.00624705	0.531555
DDX11-AS1	0.00626225	0.531424
AC008119.1	0.00626452	0.531405
AC112482.1	0.00626529	0.531398
PSPC1-AS2	0.00627339	0.531328
AL031985.3	0.00627386	0.531324
RNF165	0.00627837	0.531285
PLCG1	0.00627988	0.531272
RAB5CP2	0.00630843	0.531027
MRPS31	0.00632822	0.530858
AC103778.1	0.00634579	0.530708
HMG20A	0.00636618	0.530535
KCNAB3	0.00637241	0.530482
AC138904.1	0.00638715	0.530357
IGSF9B	0.00639018	0.530331
HNRNPA1P21	0.00640769	0.530183
C3orf70	0.00641587	0.530114
VIPAS39	0.00643666	0.529939
ZNF343	0.00644004	0.52991
RN7SL589P	0.00644314	0.529884
TSPAN7	0.00645229	0.529807
UBA6-AS1	0.0064638	0.529711
UBTF	0.00647145	0.529647
JAKMIP3	0.0065003	0.529405
AC015743.1	0.00650972	0.529327
AMD1P3	0.0065108	0.529318
LINC00649	0.00651989	0.529242
ANKFY1	0.00653827	0.529089
SUN3	0.00653925	0.529081
PTPN3	0.00654399	0.529042
HEPACAM	0.00655218	0.528974
RBL2	0.00656109	0.5289
WDR3	0.00656354	0.528879
AIFM1	0.00657458	0.528788
AL157823.2	0.00658009	0.528743
AC114489.1	0.00658842	0.528674
LRIT2	0.00659192	0.528645
IGHVII-74-1	0.006592	0.528644
AL591368.1	0.00661125	0.528486
AL591848.3	0.00661515	0.528454
AC020915.2	0.00661695	0.528439
RPL39P36	0.00661988	0.528415
GTSE1	0.0066326	0.52831
AC011257.1	0.00665424	0.528133
AC018737.2	0.00666017	0.528084
NHLRC2	0.00666547	0.528041
STAU2	0.00667404	0.527971
AC025171.1	0.00667452	0.527967
AP003108.5	0.00667775	0.527941
AL159158.1	0.00669014	0.527839
MYL12AP1	0.00669293	0.527817
OLA1P3	0.00670078	0.527753
MARS2	0.00673592	0.527467
AL590762.2	0.00676475	0.527234
IGHV3-75	0.00677483	0.527153
RNU5A-5P	0.00681083	0.526863
ALS2CL	0.00683483	0.526671
BBS7	0.00683863	0.52664
CRYBG2	0.00684159	0.526617
AC009061.2	0.00684303	0.526605
ZNF846	0.00684646	0.526578
LINC02539	0.00685068	0.526544
ADAM1B	0.00685453	0.526513
TMPRSS6	0.00685478	0.526511
TRBJ2-7	0.00685565	0.526504
MTND4P35	0.00686316	0.526444
AC008105.3	0.00686813	0.526405
AC011815.3	0.00689072	0.526225
RPS24P16	0.00689875	0.526161
AL355602.1	0.00690464	0.526114
AC090912.2	0.00693455	0.525877
AC008752.3	0.00694017	0.525833
TCHH	0.00694354	0.525806
ARL6	0.00695054	0.525751
AC020765.4	0.0069604	0.525673
AC079610.1	0.00697216	0.525581
IGHVII-30-21	0.0069745	0.525562
DHX58	0.00698493	0.52548
LINC002481	0.00701039	0.52528
AC009533.4	0.00702179	0.525191
ARL13B	0.00702266	0.525184
LDHAP2	0.00702723	0.525148
AC119403.1	0.00704784	0.524987
AC104211.1	0.00705831	0.524906
ZNF345	0.00708914	0.524666
WDR35	0.00708923	0.524665
AL390236.1	0.00709283	0.524637
LINC00342	0.00709334	0.524633
ST20	0.00709387	0.524629
SLC18B1	0.0071006	0.524577
AC015660.1	0.0071543	0.524162
PHF2	0.00715603	0.524149
AL355816.1	0.00715798	0.524134
AL136988.1	0.00716748	0.524061
OGDHL	0.00719745	0.52383
IGHV3-29	0.00720046	0.523807
AC008434.1	0.00723642	0.523532
AC097522.1	0.00724508	0.523466
AL138921.2	0.00726428	0.52332
NHEJ1	0.00728862	0.523135
Z82206.1	0.00728914	0.523131
C17orf80	0.00729082	0.523118
N4BP2L1	0.00729721	0.52307
AC061975.8	0.00730752	0.522992
ZNF337-AS1	0.0073124	0.522955
AC093579.1	0.00731663	0.522923
AC069222.1	0.00732266	0.522877
C13orf42	0.00732442	0.522864
OR10R2	0.00734444	0.522713
EIF3FP1	0.00736038	0.522593
AC069294.1	0.00737462	0.522486
KCNA3	0.0073842	0.522414
ACTG1P16	0.00738633	0.522398
AL031728.1	0.00738754	0.522389
AC010969.2	0.00739462	0.522336
BHLHB9	0.00739853	0.522307
RPL23P2	0.00742211	0.52213
LINC01187	0.0074316	0.522059
DIS3L	0.00743426	0.522039
DROSHA	0.00743814	0.522011
AC093155.1	0.00744289	0.521975
AC097713.1	0.00745543	0.521882
RPS27P14	0.00746732	0.521793
FGD5P1	0.00749895	0.521559
Z99129.3	0.00753668	0.52128
MIR924HG	0.00754541	0.521215
GOLGA2P2Y	0.00754592	0.521212
MSANTD2	0.00755787	0.521123
AC010677.1	0.00757722	0.520981
AC009120.2	0.00758369	0.520934
EVL	0.00758984	0.520889
AC131025.3	0.00759758	0.520832
SEC23IP	0.00760799	0.520756
NEO1	0.00760844	0.520752
SAP18P3	0.00764459	0.520488
AC115284.4	0.00765457	0.520416
AP000442.2	0.00765975	0.520378
ZNF638	0.00769551	0.520118
HHIPAS1	0.00773338	0.519844
AP1AR	0.00773647	0.519822
RN7SL333P	0.00774752	0.519742
GPR180	0.00775191	0.51971
AC091132.4	0.00778026	0.519507
FP236383.3	0.00778435	0.519477
ARHGAP39	0.00780611	0.519321
AC005519.1	0.00782333	0.519198
RAD51-AS1	0.00784062	0.519074
AC108448.2	0.00784064	0.519074
AL133493.1	0.00786609	0.518893
CHIAP1	0.00787173	0.518853
MMP11	0.00787459	0.518832
TBC1D4	0.00788702	0.518744
IGHV3-30-2	0.00789145	0.518713
AC103563.2	0.00789193	0.518709
RN7SKP5	0.00789273	0.518703
TIAM1	0.007903	0.518631
DDX11	0.0079424	0.518352
MIATNB	0.00794485	0.518335
AC006026.3	0.00795427	0.518268
ZNF544	0.00795511	0.518262
HTATSF1P2	0.00796332	0.518204
NTAN1P2	0.00796525	0.518191
ANKRD13B	0.00796691	0.518179
RN7SL236P	0.00796867	0.518167
MCM3AP-AS1	0.00797124	0.518149
AC020779.1	0.00797804	0.518101
AL132712.2	0.00798812	0.51803
PABPC1P10	0.008	0.517946
AC010615.1	0.00801316	0.517854
RPL27AP5	0.00801388	0.517849
IGHVII-40-1	0.00801482	0.517842
RNASEH2B-AS1	0.00802173	0.517794
TRBV30	0.00803071	0.517731
TSPAN11	0.00803246	0.517719
DSCAML1	0.00807556	0.517418
AC090241.3	0.00808173	0.517375
C1orf220	0.00810776	0.517194
PHKA2	0.00811045	0.517176
AC003685.2	0.00813798	0.516985
FLT3LG	0.00814833	0.516913
AC027763.2	0.00815479	0.516869
AC021205.3	0.00816588	0.516792
AC073389.2	0.00817907	0.516701
AC004943.2	0.00818015	0.516694
PRKCZ-AS1	0.00818433	0.516665
AC234781.5	0.00822124	0.516411
ZNF37CP	0.00822369	0.516394
AGAP2	0.00822721	0.51637
DAB1	0.00823325	0.516329
PSMG4	0.00823911	0.516289
AC097493.2	0.00824214	0.516268
KRT74	0.00830332	0.515851
AC013652.1	0.00832976	0.515671
IGHV7-56	0.00835105	0.515527
AC112128.1	0.0083527	0.515515
RSPRY1	0.00836115	0.515458
SH2D3A	0.00836883	0.515406
RPL9P2	0.00839725	0.515215
RN7SL658P	0.00842349	0.515038
AC023632.2	0.00842894	0.515001
GALNT9	0.00843163	0.514983
AP000911.1	0.00844777	0.514875
MFHAS1	0.0084626	0.514775
ENO1P2	0.00847495	0.514693
TAS2R5	0.00850106	0.514518
ATP8A2P3	0.00850197	0.514512
ITGA3	0.00851181	0.514447
AKR7A2P1	0.00853307	0.514305
AC005899.5	0.00858053	0.51399
AC004828.2	0.00859917	0.513867
IQSEC3P1	0.00863314	0.513643
IGHV3-32	0.00864177	0.513586
AL606534.1	0.00866264	0.513449
AC106858.1	0.00866964	0.513403
AP002433.2	0.00867313	0.51338
KIF18B	0.00867466	0.51337
RNU6-95P	0.00867933	0.513339
DNAJC11	0.00869629	0.513228
RNA5SP474	0.00870227	0.513189
KCNG3	0.00870521	0.51317
LAP3P1	0.00870971	0.51314
CSNK1A1P3	0.00871432	0.51311
AC107241.1	0.00873172	0.512997
AL355001.2	0.00873888	0.51295
AC003002.2	0.00874512	0.512909
AC073585.2	0.00876121	0.512805
AL136967.1	0.00876121	0.512805
CSNK1A1L	0.00877871	0.512691
TUG1	0.00878874	0.512626
AC006042.2	0.00881032	0.512486
XRCC2	0.00881159	0.512478
AL132780.2	0.00881937	0.512427
FANCC	0.00882389	0.512398
PLSCR3	0.0088605	0.512162
DLG3-AS1	0.00887031	0.512098
BRD8	0.00887955	0.512039
AL136169.1	0.00892832	0.511726
AC104596.1	0.00893785	0.511665
NPM1P33	0.00894239	0.511636
AC010733.1	0.00894336	0.51163
MTRNR2L1	0.00894788	0.511601
WDR86-AS1	0.00895685	0.511543
AC011979.1	0.00896614	0.511484
AC016866.1	0.0089877	0.511347
TDRKH	0.00902947	0.511081
HKDC1	0.00903084	0.511072
AL136988.2	0.00903877	0.511022
AL355472.2	0.00905564	0.510915
AL161756.3	0.00907456	0.510796
AL359878.2	0.0090895	0.510701
CACNB3	0.00909191	0.510686
LRRC37A4P	0.00909629	0.510658
KCTD21-AS1	0.00910407	0.510609
RNU6-30P	0.00913266	0.510429
ACTR8	0.00913815	0.510395
IPO5P1	0.00919352	0.510048
AC004943.1	0.00921934	0.509887
TENM1	0.00924544	0.509724
RNASEH2B	0.00926483	0.509604
SPATA8-AS1	0.00927734	0.509526
TTC33	0.00927901	0.509516
RNU1-58P	0.00929614	0.50941
KIF7	0.00931792	0.509275
TAS2R9	0.00933632	0.509161
AC007179.2	0.00934855	0.509086
OR13C6P	0.00935443	0.50905
FAM24B	0.0093798	0.508893
AC007671.1	0.00938724	0.508848
SPRED1	0.00941306	0.508689
SARS	0.00942514	0.508615
ORAI2	0.00944579	0.508489
AC116351.1	0.0094473	0.50848
AC009486.1	0.00946309	0.508383
MRPS6	0.00946319	0.508383
CCDC183	0.00949858	0.508167
AC104581.4	0.00951285	0.50808
AC027682.2	0.00952352	0.508016
SLC6A3	0.00953243	0.507961
AC104232.3	0.00953299	0.507958
AL450043.1	0.00953385	0.507953
GABRQ	0.00954716	0.507872
ZNF761	0.00954734	0.507871
AC006254.1	0.00955496	0.507825
AC092821.3	0.00956327	0.507775
TRAPPC13P1	0.00957655	0.507695
KCTD11	0.00958169	0.507663
AC105020.2	0.0096051	0.507522
AC141930.2	0.00960981	0.507494
IGHV1-17	0.00962295	0.507415
CELF5	0.00962622	0.507395
AKR1C8P	0.00965144	0.507243
TRAF3IP3	0.00966249	0.507177
AC096992.2	0.00967411	0.507107
RNA5SP490	0.0096836	0.507051
CR769776.2	0.00968871	0.50702
AC009312.1	0.00969263	0.506997
SLC4A11	0.00972352	0.506812
IGHVIII-22-2	0.00972895	0.50678
AL139094.1	0.00972946	0.506777
ADA	0.00974098	0.506708
ZNF623	0.00974717	0.506671
C9orf85	0.00976194	0.506583
AC068946.1	0.00977916	0.506481
UBE2G2	0.00978921	0.506421
AL591686.1	0.00979119	0.506409
ZNF37BP	0.00979227	0.506403
ANO9	0.0098015	0.506348
RPS3AP38	0.00980497	0.506328
VARS2	0.00983079	0.506175
PYY2	0.00985229	0.506048
RPL22P8	0.00987292	0.505926
MIR4446	0.00991297	0.505691
RNU6-529P	0.00991764	0.505664
AL603882.1	0.00992765	0.505605
ZIK1P1	0.00993356	0.50557
RCC1	0.00995763	0.505429
AL357143.1	0.00997781	0.505311
MIR4261	0.0100036	0.505161
AHCYP2	0.0100084	0.505133
AL139243.1	0.0100154	0.505092
AL445309.1	0.0100278	0.50502
SBSPON	0.0100488	0.504898
AL137186.1	0.0100609	0.504828
TMA16	0.0100623	0.504819
TRAF5	0.0100626	0.504818
LINC01560	0.0100817	0.504707
MAP2K6	0.010127	0.504445
RB1	0.0101361	0.504393
AC016526.2	0.0101371	0.504387
ADARB2-AS1	0.0101415	0.504362
ANO6	0.0101484	0.504322
AC008969.1	0.01016	0.504255
SALL3	0.0101601	0.504255
AC004551.2	0.0101674	0.504213
RSBN1L	0.0101701	0.504198
ZNF197	0.0101769	0.504158
AC148477.3	0.0101845	0.504115
DNAH17	0.0102102	0.503967
PXYLP1	0.0102114	0.503961
AC019186.1	0.0102675	0.50364
AC009102.2	0.0102725	0.503611
CUZD1	0.0102841	0.503545
AC011447.6	0.0103033	0.503436
CCDC122	0.0103067	0.503417
AL513175.2	0.0103114	0.50339
AC066613.1	0.0103339	0.503262
AC016691.1	0.010337	0.503245
NPM1P31	0.0103456	0.503196
CD40LG	0.0103501	0.50317
CLEC2D	0.0103589	0.50312
ACER1	0.0103651	0.503085
Z83843.1	0.0103928	0.502929
AL035665.2	0.010407	0.502849
ARSD-AS1	0.0104082	0.502842
AC116347.1	0.0104155	0.502801
EEF1A1P28	0.0104268	0.502737
AL355773.1	0.0104336	0.502699
AC005996.1	0.010447	0.502624
AL109628.2	0.0104504	0.502604
AC060780.1	0.010512	0.502259
RAET1K	0.010513	0.502254
AC017079.2	0.0105431	0.502085
AC074135.1	0.0105576	0.502005
AC109462.3	0.0105774	0.501894
AC083829.1	0.0105811	0.501874
DHX36	0.0106107	0.501709
AL031274.1	0.0106349	0.501575
EPHA4	0.0106443	0.501523
AC106799.3	0.0106559	0.501459
USP40	0.0106724	0.501368
TTF2	0.0106747	0.501355
DNAJC24	0.0106908	0.501266
BATF3	0.010702	0.501205
RAB40A	0.0107022	0.501203
AL160035.1	0.0107095	0.501163
AC055764.1	0.0107232	0.501088
SLC35G1	0.010731	0.501045
AC074134.1	0.0107522	0.500928
PITPNC1	0.0107865	0.50074
IGHV3-54	0.0108107	0.500608
AC027559.1	0.0108121	0.5006
CCR8	0.010818	0.500568
ATF1	0.0108205	0.500555
SORBS2	0.0108426	0.500434
FRMD6	0.0108452	0.50042
FAM161B	0.0108459	0.500416
GEMIN4	0.0108496	0.500396
RN7SL751P	0.01086	0.500339
JRK	0.010901	0.500116
OSBPL9P4	0.0109068	0.500085
ZNF665	0.010936	0.499927
TLR9	0.0109763	0.499709
L29074.1	0.0109792	0.499693
AC087645.3	0.0110049	0.499555
AC103739.2	0.0110145	0.499503
AC073857.1	0.0110243	0.499451
XYLB	0.0110292	0.499424
AP001999.3	0.0110311	0.499414
AC233296.1	0.0110577	0.499271
COG2	0.0110698	0.499206
AC016747.4	0.0110784	0.49916
VSX1	0.011101	0.499039
POLR2KP1	0.0111234	0.49892
AC004816.1	0.0111259	0.498906
C6orf223	0.0111538	0.498758
PROK1	0.0111573	0.498739
AC073610.2	0.0111817	0.498609
AC004908.1	0.0111983	0.498521
DHRS4L1	0.0112194	0.498409
TRIP11	0.0112283	0.498362
LRCH3	0.011256	0.498216
AC011005.4	0.011265	0.498168
FCF1P5	0.0112718	0.498132
ZNF154	0.011291	0.498031
GLUD1P2	0.0113149	0.497905
HS3ST1	0.0113446	0.497749
AC104073.4	0.0113487	0.497728
AL603839.3	0.0113503	0.497719
ZNF37A	0.0113551	0.497694
TMEM213	0.0113575	0.497681
HOMER2P2	0.0114165	0.497373
OR6W1P	0.0114289	0.497308
HSPA8P20	0.0114585	0.497154
AC100803.2	0.0114645	0.497122
AL139811.2	0.0114818	0.497032
ZNF710-AS1	0.0114914	0.496983
CDH24	0.011505	0.496912
LINC01993	0.0115138	0.496866
NFATC2IP	0.0115487	0.496686
OR7E1P	0.0115617	0.496618
LINC00685	0.0115666	0.496593
AC092042.1	0.0116071	0.496384
AC022296.2	0.0116139	0.496349
AL122003.1	0.0116196	0.49632
ECHDC2	0.0116311	0.496261
AC104162.1	0.011638	0.496225
AL158151.1	0.01164	0.496215
AC096564.2	0.0116859	0.495979
AC097713.3	0.0117001	0.495907
NONOP2	0.0117038	0.495888
GTF2H4	0.011745	0.495677
AC133555.3	0.0117678	0.495561
AC138904.3	0.0117709	0.495545
AC112484.5	0.0117744	0.495527
VANGL2	0.0118321	0.495234
EI24P2	0.0118396	0.495196
IGHV3-47	0.0118406	0.495191
PCID2	0.0118469	0.495159
STX16-NPEPL1	0.0118481	0.495153
TREX2	0.0118583	0.495101
AL139289.1	0.0118616	0.495085
PPP2R3B	0.0118964	0.494909
LIN28B	0.0119046	0.494868
RNY3	0.0119188	0.494796
AC079331.2	0.0119249	0.494765
NTM-AS1	0.0119587	0.494595
HNRNPA3P7	0.011963	0.494574
ZNF594	0.0119735	0.494521
EFNB2	0.0119897	0.494439
AP006621.2	0.012014	0.494318
AC021092.1	0.0120304	0.494236
EGFL8	0.0120518	0.494129
ZNF354C	0.0120594	0.494091
AC063926.3	0.0120733	0.494022
AC018868.2	0.0120922	0.493927
FAM66C	0.0121031	0.493873
AC011447.4	0.0121481	0.49365
KLHL3	0.0121925	0.49343
ZNF32-AS2	0.0121953	0.493416
DUSP18	0.0121953	0.493416
TMIE	0.0122507	0.493142
AC092809.4	0.0122563	0.493115
LINC01128	0.0122819	0.492989
AC005962.1	0.0122833	0.492982
KIF21B	0.0122853	0.492972
SLC25A25-AS1	0.0122856	0.49297
AL512283.1	0.0122923	0.492937
SLC8A1-AS1	0.0122957	0.492921
AC125238.2	0.0123291	0.492757
SIRT5	0.0123463	0.492673
AC010618.4	0.0123479	0.492665
AL159169.3	0.0123774	0.492521
ITPR3	0.012391	0.492454
AC093152.1	0.012391	0.492454
GOPC	0.0123994	0.492413
AC105749.1	0.0124032	0.492395
DQX1	0.0124144	0.49234
BRD3OS	0.0124252	0.492288
AC008507.5	0.0124675	0.492082
PGLYRP4	0.0124766	0.492038
AC068228.3	0.0124802	0.49202
AC116337.3	0.0124814	0.492014
AL627389.1	0.0125104	0.491874
OAS2	0.0125173	0.49184
AC004112.1	0.0125237	0.491809
ACTG1P22	0.0125362	0.491749
AL391416.1	0.0125431	0.491716
MAP3K20-AS1	0.012584	0.491518
LYG1	0.0126648	0.49113
AC017028.2	0.0127056	0.490935
SYNGAP1	0.0127056	0.490935
OBSCN-AS1	0.0127242	0.490846
AL161644.1	0.0127264	0.490836
TRDMT1	0.012769	0.490632
AC104662.1	0.0127699	0.490628
LINC00562	0.0127789	0.490585
LINC00846	0.0127809	0.490576
CELSR2	0.0127819	0.490571
FRMPD4	0.0127928	0.490519
BRD3	0.0128015	0.490478
TCHP	0.0128848	0.490083
CYP4F11	0.0129023	0.49
SEPT7P9	0.0129152	0.489939
RGS5	0.0129289	0.489875
AC092111.1	0.0129476	0.489787
AL354919.1	0.0129588	0.489734
RPS4XP1	0.0129768	0.48965
FGD1	0.0129887	0.489594
AC068870.1	0.0129934	0.489572
SDHCP4	0.0129969	0.489555
AC008945.2	0.0130547	0.489284
AC073335.1	0.0130572	0.489273
NXF4	0.0130576	0.489271
CLDN18	0.0130581	0.489268
HMGB3P24	0.0130774	0.489179
AC009296.1	0.013082	0.489157
ZFP90	0.0130977	0.489084
DBH	0.0131187	0.488986
AC087752.1	0.0131188	0.488985
AC007846.1	0.0131211	0.488975
LINC02561	0.0131326	0.488921
IGHV3-22	0.0131386	0.488893
AC022893.3	0.013139	0.488891
AC037459.4	0.0131391	0.488891
AL158207.1	0.0131486	0.488847
AC093677.3	0.0131777	0.488711
AP003498.1	0.0131915	0.488647
RF01699	0.0132123	0.488551
AC009533.3	0.0132471	0.48839
AL354760.1	0.0132562	0.488348
SLC35E3	0.0132619	0.488322
AL133325.3	0.0132657	0.488305
AL670729.3	0.013272	0.488275
LINC01147	0.0132914	0.488186
PBLD	0.0133075	0.488112
LTO1	0.0133078	0.488111
COL4A5	0.0133082	0.488109
HMGB1P41	0.0133384	0.48797
AC009404.1	0.0133385	0.487969
AC093525.6	0.013341	0.487958
AC137630.4	0.0133451	0.487939
RNFT2	0.013349	0.487921
NPHP4	0.0133515	0.48791
EXOC7P1	0.0133846	0.487758
PANX3	0.013389	0.487738
IL17RB	0.0134454	0.48748
AL355816.2	0.0134466	0.487475
PHF6	0.013447	0.487473
AL162231.4	0.0134483	0.487467
ASNS	0.0134514	0.487453
AL391058.1	0.0134523	0.487449
ZNF605	0.0134586	0.48742
AC097493.1	0.013473	0.487354
AL365434.2	0.0135008	0.487227
INPP4A	0.0135316	0.487088
AC100830.2	0.0135393	0.487053
PGAM1P12	0.0135424	0.487039
SEPHS1	0.0135438	0.487032
MICD	0.0135448	0.487028
AL390835.1	0.0135456	0.487025
RPL7P61	0.0135518	0.486996
SLC16A4	0.0135542	0.486985
LINC02625	0.0135618	0.486951
AC096586.2	0.0135874	0.486835
C10orf143	0.0136254	0.486664
OR10K1	0.0136474	0.486564
CD8A	0.0136501	0.486552
FAM90A20P	0.0136575	0.486519
ROBO1	0.0136821	0.486408
AC245884.10	0.0137033	0.486313
AC026771.1	0.0137147	0.486261
NPBWR1	0.0137301	0.486192
SLC25A5-AS1	0.0137318	0.486185
PAXIP1-AS2	0.0137453	0.486124
IGHV1-14	0.0137603	0.486057
AC011509.1	0.0138291	0.48575
STAMBPL1	0.0138341	0.485727
CD96	0.013873	0.485554
ZNF549	0.0138829	0.48551
USP17L2	0.0138833	0.485508
LINC00689	0.0138939	0.485461
AC129492.8	0.0138946	0.485458
AC093157.2	0.0139017	0.485427
CEP41	0.0139057	0.485409
LINC01291	0.0139505	0.48521
AC069277.1	0.0139645	0.485148
ULBP1	0.0139739	0.485107
SLC35E2B	0.0140015	0.484985
AC114808.2	0.0140265	0.484875
GIMAP3P	0.0140577	0.484737
RN7SL832P	0.0140738	0.484667
CCDC136	0.0141035	0.484536
RHOU	0.0141321	0.484411
PIGL	0.0141356	0.484395
CCDC146	0.0141616	0.484282
AC025171.4	0.0141639	0.484272
AL136368.1	0.0141642	0.48427
AL161457.2	0.014173	0.484232
ZSWIM7	0.0141737	0.484229
HSPA12B	0.0141777	0.484211
AL354733.3	0.0141805	0.484199
AL365229.1	0.0142069	0.484084
LINC01137	0.0142092	0.484074
ADAMTS1	0.0142194	0.484029
NAPSA	0.0142316	0.483976
AC025062.1	0.0142571	0.483865
CRYZL1	0.0142834	0.483751
TBCE	0.0142869	0.483736
A2MP1	0.014298	0.483688
B4GALT6	0.014313	0.483623
AC015468.2	0.0143265	0.483564
RNA5SP435	0.0143385	0.483512
AC005304.1	0.0143574	0.48343
AC087650.1	0.0143664	0.483392
DNASE1	0.0143844	0.483314
TNS4	0.0144089	0.483208
RNVU1-1	0.014421	0.483156
AK9	0.0144409	0.48307
LINC00939	0.014446	0.483049
MTCYBP21	0.0144849	0.482881
RUSC1-AS1	0.0144904	0.482858
PHF23	0.0145102	0.482773
BMS1P11	0.0145132	0.48276
AC104759.1	0.0145613	0.482554
LINC01727	0.0145761	0.482491
GPR150	0.0145836	0.482459
ACTG1P11	0.0145926	0.482421
SHPRH	0.0145936	0.482417
RNA5SP82	0.0146125	0.482336
AL513534.2	0.0146288	0.482266
RETNLB	0.0146482	0.482184
CACNA1I	0.0146544	0.482157
ZAP70	0.0146545	0.482157
SULT1A3	0.0146636	0.482118
AL360020.1	0.0146669	0.482104
COL6A3	0.0146745	0.482072
PPIAP7	0.0146921	0.481998
USP17L7	0.0147166	0.481893
AC005586.2	0.0147193	0.481882
FAM27C	0.0147219	0.481871
RPL7P15	0.0147296	0.481839
E2F5	0.014836	0.481389
AP001767.4	0.0148377	0.481382
CAPS2	0.0148442	0.481355
AP001471.1	0.0148527	0.481319
SLC9A3	0.0148589	0.481293
RNF224	0.014879	0.481209
ASCL5	0.0148811	0.4812
ATP2B4	0.0148888	0.481168
RPL3P9	0.0148963	0.481136
ITGB4	0.0149075	0.481089
FLRT3	0.0149537	0.480896
RPL22P12	0.014961	0.480866
LINC01656	0.0149806	0.480783
AC011491.3	0.0149912	0.480739
PPIAP67	0.0149986	0.480708
CTBP1-DT	0.0150018	0.480695
ZNF75D	0.0150105	0.480659
AL078624.1	0.015072	0.480403
FP671120.4	0.0150747	0.480392
SYT5	0.0150927	0.480317
AC109462.2	0.0151137	0.48023
LINC00634	0.0151194	0.480206
IDNK	0.0151323	0.480153
AC008494.2	0.0151389	0.480125
WEE2-AS1	0.0151433	0.480108
GCSAM	0.0151435	0.480106
AC105941.1	0.0151441	0.480104
PRKAR1B	0.0151449	0.480101
BX682237.1	0.0151845	0.479937
BCOR	0.0152134	0.479818
PTPDC1	0.015235	0.479729
RNU2-11P	0.0152575	0.479636
RPL26P37	0.0152996	0.479463
AC010894.4	0.0153106	0.479418
DIO2	0.0153117	0.479414
ZNF701	0.0153125	0.479411
MIR6739	0.0153127	0.479409
INVS	0.0153394	0.4793
RNF32	0.0153752	0.479154
AL357033.2	0.0153796	0.479136
GRM7-AS3	0.0153891	0.479097
OR2AE1	0.0153899	0.479094
AC092802.2	0.0154112	0.479007
CNOT1	0.015418	0.478979
CFAP44	0.0154201	0.478971
DUSP16	0.0154242	0.478954
AL583805.2	0.0154294	0.478933
C12orf65	0.0154295	0.478932
AGBL5-IT1	0.0154517	0.478842
NUDT13	0.0154698	0.478768
RN7SL19P	0.0154706	0.478765
AC063952.2	0.015471	0.478763
AL355303.2	0.0155086	0.47861
AC011506.1	0.0155209	0.478561
AC109460.1	0.0155385	0.478489
AC092658.1	0.015545	0.478463
AC061975.7	0.0155572	0.478414
AC099535.1	0.0155575	0.478412
AC114490.3	0.0155583	0.478409
GNG13	0.0155696	0.478363
AC068790.4	0.0155804	0.47832
KLHL17	0.0155905	0.478279
HMGN1P5	0.0155987	0.478246
MSS51	0.0156054	0.478219
CU633904.1	0.0156086	0.478206
PDE6B	0.0156155	0.478178
PPP1R3E	0.015618	0.478168
SMO	0.0156192	0.478163
AC148477.9	0.0156288	0.478124
AMOT	0.0156608	0.477996
ITIH4	0.0156635	0.477985
AL160396.1	0.0157013	0.477833
ZNF81	0.0157031	0.477826
AC061708.1	0.0157243	0.47774
LINC01222	0.0157283	0.477724
ZNF491	0.0157336	0.477703
ITGA10	0.0157546	0.477619
AP001372.1	0.015755	0.477617
PARG	0.0157577	0.477607
TMEM184C	0.0157617	0.477591
PRC1-AS1	0.0157766	0.477531
ZNF583	0.0157858	0.477494
AL117339.5	0.0157919	0.47747
AL683807.1	0.0157963	0.477452
AC116348.2	0.0158095	0.477399
Z99129.1	0.0158215	0.477351
RANP8	0.015838	0.477285
LINC01521	0.0158502	0.477237
TMEM186	0.0159111	0.476995
TMEM184A	0.0159252	0.476938
ACO1	0.0159669	0.476773
AL080317.3	0.0159704	0.476759
SNX15	0.0159764	0.476736
BX088651.4	0.0159791	0.476725
LYST-AS1	0.0159868	0.476695
OTUD7B	0.0159947	0.476663
ZNF143	0.0159952	0.476661
AC004492.1	0.0160068	0.476615
MTND4P1	0.0160525	0.476435
CSPG4P5	0.0160574	0.476416
AC022929.2	0.016075	0.476346
LINC01337	0.0160988	0.476253
AC011447.7	0.016101	0.476244
HIRA	0.0161401	0.47609
AC090907.3	0.016143	0.476079
TOP1MT	0.0161705	0.475971
LINC01726	0.0161711	0.475969
AC121761.2	0.0161755	0.475951
LETMD1	0.0161875	0.475904
HEMK1	0.0162143	0.475799
C19orf57	0.0162161	0.475792
FAM90A24P	0.0162304	0.475736
FOXB1	0.0162585	0.475627
ZNF202	0.0162589	0.475625
NSMCE1	0.0162602	0.47562
AC148477.6	0.0162776	0.475552
CHDH	0.0163266	0.475361
C22orf46	0.0163324	0.475338
RASA1	0.0163428	0.475298
RNA5SP283	0.0163533	0.475257
PRR7	0.0163533	0.475257
CARNS1	0.0163538	0.475255
RIMBP2	0.0163699	0.475193
RCOR2	0.0163733	0.47518
AP006296.1	0.0163963	0.47509
EP400P1	0.0164	0.475076
ZNF83	0.0164123	0.475029
TNFAIP1	0.0164244	0.474982
AC004828.1	0.016432	0.474952
LINC00563	0.0164523	0.474874
AC079447.1	0.0164778	0.474775
AL157912.1	0.0164883	0.474735
AC015468.1	0.0164924	0.474719
FAM133CP	0.0165228	0.474602
MTCYBP28	0.0165567	0.474471
LY6H	0.0165738	0.474405
PPP1R2P1	0.0165789	0.474386
RN7SL563P	0.0165807	0.474379
MAP3K7	0.016619	0.474232
AC055811.4	0.0166195	0.47423
CPO	0.0166592	0.474078
MTATP6P17	0.0166621	0.474067
CSTF3	0.0166663	0.474051
SMIM36	0.0166705	0.474035
RAD50	0.0166808	0.473996
AC002519.1	0.0166829	0.473988
BNIP3P17	0.016694	0.473945
LSP1P4	0.0166992	0.473925
DNAJC18	0.0167119	0.473876
NXPH1	0.0167261	0.473822
BBS4	0.0167265	0.473821
AC005052.2	0.01673	0.473808
AC141930.1	0.0167562	0.473708
CEL	0.0167794	0.473619
INE2	0.0168098	0.473504
LIAS	0.0168146	0.473486
AL391095.1	0.0168249	0.473447
NBR1	0.0168318	0.473421
AC069277.2	0.0168575	0.473323
ANKRD34A	0.0168628	0.473303
AL671309.1	0.016866	0.473291
SLC29A1	0.0168664	0.473289
AC123512.1	0.016874	0.473261
CPLX1	0.0168832	0.473226
PRR7-AS1	0.0168909	0.473197
AC006480.2	0.0168983	0.473169
IGHV3-41	0.0169178	0.473095
AL390763.1	0.0169294	0.473051
IGHVIII-16-1	0.016931	0.473045
SPTBN1	0.0169343	0.473033
CHRNA5	0.0169466	0.472986
INTS6-AS1	0.0169592	0.472939
IGHVIII-13-1	0.0169956	0.472801
TTL	0.0170256	0.472689
AC024619.1	0.017026	0.472687
PILRB	0.017046	0.472612
AL596223.1	0.0170529	0.472586
LINC02325	0.017059	0.472563
AL121890.3	0.0170617	0.472553
MIR3942	0.0170627	0.472549
AL132796.2	0.0170667	0.472534
SPICE1	0.0170776	0.472493
[truncated: 51,994 more rows]

## Sheet: HHIP-AS1
.id	p.value	R
HHIPAS1	0	1
TMEM26	2.69465e-11	0.927306
VAT1	1.75902e-10	0.913926
AC005831.1	7.0953e-09	0.879475
AC104984.4	9.99156e-09	0.875622
AC007100.2	1.11224e-08	0.874388
AL354733.3	1.53431e-08	0.870607
LRIT2	1.57743e-08	0.870276
SCARA5	1.64441e-08	0.869777
IGHVIII-11-1	1.73264e-08	0.869147
SPATA8-AS1	1.98114e-08	0.867517
AL133371.3	2.11041e-08	0.866741
LINC02273	2.29343e-08	0.865712
AC079612.2	2.30538e-08	0.865647
ARHGAP39	2.50423e-08	0.864615
SBSPON	2.62584e-08	0.86402
GLB1L3	2.66261e-08	0.863844
AC104232.3	3.08684e-08	0.861967
CLDN18	4.3357e-08	0.857547
AC099677.1	5.4696e-08	0.854438
HHIP	5.94616e-08	0.853302
MYB-AS1	6.11363e-08	0.852922
SHC1P2	7.01957e-08	0.851017
TMPRSS2	7.25517e-08	0.850558
HNRNPA1P21	7.39305e-08	0.850295
SLC29A4	8.10726e-08	0.849003
AC015813.6	8.14914e-08	0.84893
ZIK1P1	9.59259e-08	0.846613
FLNB-AS1	9.83687e-08	0.846252
AC116348.2	1.07302e-07	0.844998
AL606534.1	1.07437e-07	0.84498
AC138904.3	1.10731e-07	0.844542
MYB	1.17667e-07	0.843656
AL035665.1	1.21918e-07	0.843136
NPBWR1	1.23384e-07	0.84296
RNA5SP490	1.25241e-07	0.842741
AC026495.2	1.28911e-07	0.842315
TMEM213	1.34105e-07	0.841731
GABRQ	1.40345e-07	0.841055
AL133475.1	1.41444e-07	0.840939
AC022916.1	1.4352e-07	0.840722
ETS1	1.49931e-07	0.840068
AC079610.1	1.59901e-07	0.8391
AC007846.1	1.87817e-07	0.836653
MTCYBP21	1.97988e-07	0.835842
ITGB4	2.05059e-07	0.8353
LINC01291	2.06293e-07	0.835207
AC011005.4	2.13606e-07	0.834667
GRIP2	2.14438e-07	0.834606
AC008494.2	2.21211e-07	0.834122
AC015468.2	2.21272e-07	0.834118
SBK1	2.25789e-07	0.833802
GABRA3	2.28412e-07	0.833622
LINC00887	2.30121e-07	0.833505
AC006452.1	2.3244e-07	0.833348
USP17L7	2.41861e-07	0.832724
AC103563.2	2.43915e-07	0.832591
IGHV3-57	2.49014e-07	0.832265
AC010609.1	2.53198e-07	0.832001
LINC01726	2.61376e-07	0.831498
INSIG2	2.72597e-07	0.83083
OCIAD1-AS1	2.73028e-07	0.830805
AL035665.2	2.8268e-07	0.83025
RNU6-30P	2.86609e-07	0.830029
AC126544.1	2.92367e-07	0.829711
LINC01891	2.98806e-07	0.829361
PABPC1P7	3.01304e-07	0.829227
HSPA8P20	3.05825e-07	0.828987
AC114744.1	3.12978e-07	0.828614
MFHAS1	3.2199e-07	0.828154
AC015468.1	3.23747e-07	0.828066
AP000902.1	3.31614e-07	0.827676
GRM7-AS3	3.39388e-07	0.827299
AC243562.1	3.44015e-07	0.827078
C16orf92	3.48e-07	0.82689
AC092042.1	3.48198e-07	0.826881
AC015574.1	3.51485e-07	0.826727
FAT2	3.55497e-07	0.826542
AL365229.1	3.64386e-07	0.826137
AC097375.5	3.70542e-07	0.825862
RIMBP2	3.71954e-07	0.825799
AL160396.1	3.72341e-07	0.825782
AC092641.1	3.81971e-07	0.825361
AC093579.1	3.84788e-07	0.82524
RNA5SP323	3.89617e-07	0.825034
AL390236.1	3.9389e-07	0.824854
AP003071.4	4.0686e-07	0.824317
TRIM42	4.1043e-07	0.824172
PPP1R2P1	4.12997e-07	0.824068
RN7SKP272	4.1574e-07	0.823958
AC117383.1	4.33156e-07	0.823274
AC091982.1	4.39839e-07	0.823018
AP002449.1	4.5359e-07	0.822502
SLC6A3	4.60555e-07	0.822246
KCNA2	4.67758e-07	0.821985
MCTS1	4.68461e-07	0.821959
MIR503HG	4.71497e-07	0.82185
AL121888.1	4.71652e-07	0.821845
WNT8B	4.90492e-07	0.821183
MRGPRD	5.02851e-07	0.820761
AP001999.3	5.11512e-07	0.820471
RNASEH2B-AS1	5.32752e-07	0.819778
UBE2V2P3	5.34079e-07	0.819736
LIG4	5.41318e-07	0.819506
AL731553.1	5.42862e-07	0.819457
AL032821.1	5.58763e-07	0.818963
ATCAY	5.62323e-07	0.818854
AL805961.2	5.64869e-07	0.818776
AL354794.2	5.70294e-07	0.818612
RNU6-1048P	5.7858e-07	0.818364
AL513128.3	5.84149e-07	0.818199
OPALIN	5.87906e-07	0.818088
AC132219.1	5.92591e-07	0.817951
SNRPFP2	6.02912e-07	0.817653
AC008537.2	6.03119e-07	0.817647
AL161729.4	6.30544e-07	0.816876
AC079340.3	6.38021e-07	0.816671
AC114939.1	6.55092e-07	0.816211
SIRPG-AS1	6.55375e-07	0.816204
IGHVIII-13-1	6.59138e-07	0.816104
HSD17B2	6.64142e-07	0.815972
BNIP3P17	6.68404e-07	0.81586
AL583834.1	6.72063e-07	0.815764
FAM90A25P	6.72605e-07	0.81575
AC063926.3	6.91585e-07	0.815263
AP003072.2	6.92435e-07	0.815241
PLCH1-AS1	6.95782e-07	0.815157
DEFB109D	6.98801e-07	0.815081
RNU6-1024P	7.01314e-07	0.815018
CYP4F11	7.07975e-07	0.814851
LINC01727	7.15781e-07	0.814659
AL122003.1	7.42797e-07	0.814005
IGHVII-15-1	7.49611e-07	0.813844
AL671309.1	7.63686e-07	0.813514
AC092802.2	7.64049e-07	0.813506
C2orf16	7.67737e-07	0.81342
PP2D1	7.69709e-07	0.813375
PRG4	7.69942e-07	0.813369
SLC20A1P2	7.80751e-07	0.813122
AC109462.1	7.84133e-07	0.813045
AC099501.1	8.05134e-07	0.812575
AC148477.6	8.18233e-07	0.812287
AC104655.1	8.21105e-07	0.812224
OR10K1	8.21613e-07	0.812213
AL121950.1	8.32161e-07	0.811985
RPL23AP61	8.36101e-07	0.811901
ZRANB2-AS1	8.44827e-07	0.811715
AC148477.10	8.87559e-07	0.810829
LIPI	8.94255e-07	0.810693
LINC02360	9.04483e-07	0.810488
GNRHR	9.13807e-07	0.810303
RNU2-46P	9.1834e-07	0.810214
RPS27AP10	9.28991e-07	0.810005
OAZ3	9.2992e-07	0.809987
AL137159.1	9.4657e-07	0.809666
CYYR1-AS1	9.51089e-07	0.809579
AL355916.2	9.52721e-07	0.809548
CSPG4P5	9.70705e-07	0.809209
TRBV12-1	9.81273e-07	0.809012
AC011377.1	9.84037e-07	0.808961
PDE6C	9.84783e-07	0.808947
FNDC8	9.85492e-07	0.808934
RPL6P7	9.95789e-07	0.808744
ARPP21-AS1	9.96266e-07	0.808736
TCFL5	1.02317e-06	0.808249
LPO	1.02731e-06	0.808176
ZBED2	1.02837e-06	0.808157
GPR153	1.03136e-06	0.808103
GOLGA8VP	1.04011e-06	0.807949
FERP1	1.04047e-06	0.807943
AL353593.2	1.04346e-06	0.80789
ANKRD18EP	1.05375e-06	0.80771
IGHV7-56	1.09493e-06	0.807006
AC013476.1	1.09919e-06	0.806934
AL390763.1	1.10952e-06	0.806762
AF230666.1	1.11945e-06	0.806598
AC025180.1	1.12723e-06	0.80647
SPIN4-AS1	1.15418e-06	0.806033
CCDC39	1.17014e-06	0.805779
AC109587.1	1.18369e-06	0.805565
MAGEA8	1.18878e-06	0.805486
IGHV1-14	1.18954e-06	0.805474
PLCXD2-AS1	1.20585e-06	0.805221
AC005336.1	1.21689e-06	0.805051
SLIT1-AS1	1.22688e-06	0.804899
CHRND	1.23492e-06	0.804777
AC141930.1	1.24485e-06	0.804628
EI24P2	1.24617e-06	0.804608
H1FNT	1.25852e-06	0.804424
IFNA20P	1.26361e-06	0.804348
LINC02048	1.26998e-06	0.804254
RNU7-75P	1.28146e-06	0.804086
AL137025.1	1.28217e-06	0.804076
IGHVIII-16-1	1.29007e-06	0.803961
MAGEE2	1.29963e-06	0.803822
IGHV1-12	1.30916e-06	0.803685
EP300-AS1	1.33338e-06	0.803341
DBH	1.33772e-06	0.80328
AC114488.1	1.34278e-06	0.803209
AC004805.3	1.34455e-06	0.803184
AC006236.1	1.34455e-06	0.803184
AC006512.2	1.34455e-06	0.803184
AC007566.2	1.34455e-06	0.803184
AC007952.8	1.34455e-06	0.803184
AC009097.1	1.34455e-06	0.803184
AC009704.1	1.34455e-06	0.803184
AC010307.1	1.34455e-06	0.803184
AC010551.1	1.34455e-06	0.803184
AC010632.3	1.34455e-06	0.803184
AC010636.1	1.34455e-06	0.803184
AC012640.5	1.34455e-06	0.803184
AC013410.2	1.34455e-06	0.803184
AC022165.1	1.34455e-06	0.803184
AC034222.1	1.34455e-06	0.803184
AC068781.1	1.34455e-06	0.803184
AC074101.1	1.34455e-06	0.803184
AC078785.3	1.34455e-06	0.803184
AC084121.13	1.34455e-06	0.803184
AC089987.2	1.34455e-06	0.803184
AC090616.4	1.34455e-06	0.803184
AC090877.2	1.34455e-06	0.803184
AC091544.1	1.34455e-06	0.803184
AC091905.1	1.34455e-06	0.803184
AC092683.2	1.34455e-06	0.803184
AC093767.1	1.34455e-06	0.803184
AC103794.1	1.34455e-06	0.803184
AC104698.1	1.34455e-06	0.803184
AC106748.1	1.34455e-06	0.803184
AC119619.1	1.34455e-06	0.803184
AC133539.1	1.34455e-06	0.803184
AC134981.1	1.34455e-06	0.803184
AC138932.4	1.34455e-06	0.803184
AC148477.8	1.34455e-06	0.803184
AC244102.2	1.34455e-06	0.803184
AC253536.2	1.34455e-06	0.803184
AF246928.1	1.34455e-06	0.803184
AL049830.2	1.34455e-06	0.803184
AL121895.2	1.34455e-06	0.803184
AL137789.2	1.34455e-06	0.803184
AL139316.1	1.34455e-06	0.803184
AL160275.1	1.34455e-06	0.803184
AL162385.1	1.34455e-06	0.803184
AL162408.1	1.34455e-06	0.803184
AL162584.1	1.34455e-06	0.803184
AL356292.1	1.34455e-06	0.803184
AL359837.1	1.34455e-06	0.803184
AL390774.1	1.34455e-06	0.803184
AL445493.3	1.34455e-06	0.803184
AL590084.3	1.34455e-06	0.803184
AL590240.3	1.34455e-06	0.803184
AL590399.2	1.34455e-06	0.803184
AL592045.1	1.34455e-06	0.803184
AL603910.2	1.34455e-06	0.803184
AP000844.2	1.34455e-06	0.803184
AP000859.1	1.34455e-06	0.803184
AP002414.1	1.34455e-06	0.803184
AP005435.1	1.34455e-06	0.803184
C1orf137	1.34455e-06	0.803184
CDH12P2	1.34455e-06	0.803184
CDY4P	1.34455e-06	0.803184
COX6B1P5	1.34455e-06	0.803184
DEFA1	1.34455e-06	0.803184
DEFB109C	1.34455e-06	0.803184
FAM226B	1.34455e-06	0.803184
FAM230F	1.34455e-06	0.803184
FAM90A11P	1.34455e-06	0.803184
FP671120.9	1.34455e-06	0.803184
GAPDHP19	1.34455e-06	0.803184
HES3	1.34455e-06	0.803184
IGHD1OR15-1B	1.34455e-06	0.803184
IGHV1OR15-3	1.34455e-06	0.803184
IGHV3OR16-11	1.34455e-06	0.803184
IGHVII-46-1	1.34455e-06	0.803184
IGLCOR22-1	1.34455e-06	0.803184
IGLVI-63	1.34455e-06	0.803184
KRT16P5	1.34455e-06	0.803184
KRT19P4	1.34455e-06	0.803184
KRTAP10-4	1.34455e-06	0.803184
MAGEA10-MAGEA5	1.34455e-06	0.803184
MAGI1-AS1	1.34455e-06	0.803184
MIR3689D2	1.34455e-06	0.803184
MIR4507	1.34455e-06	0.803184
MIR5004	1.34455e-06	0.803184
MIR649	1.34455e-06	0.803184
MIR6499	1.34455e-06	0.803184
MIR6745	1.34455e-06	0.803184
MIR6825	1.34455e-06	0.803184
MIR7159	1.34455e-06	0.803184
MIR718	1.34455e-06	0.803184
MTATP6P29	1.34455e-06	0.803184
MTCO3P5	1.34455e-06	0.803184
OR13J1	1.34455e-06	0.803184
OR2AQ1P	1.34455e-06	0.803184
RF00592	1.34455e-06	0.803184
RN7SKP17	1.34455e-06	0.803184
RN7SKP39	1.34455e-06	0.803184
RN7SL668P	1.34455e-06	0.803184
RNA5SP197	1.34455e-06	0.803184
RNA5SP329	1.34455e-06	0.803184
RNA5SP339	1.34455e-06	0.803184
RNA5SP357	1.34455e-06	0.803184
RNA5SP378	1.34455e-06	0.803184
RNA5SP491	1.34455e-06	0.803184
RNA5SP534	1.34455e-06	0.803184
RNA5SP94	1.34455e-06	0.803184
RNU4-48P	1.34455e-06	0.803184
RNU6-1039P	1.34455e-06	0.803184
RNU6-1116P	1.34455e-06	0.803184
RNU6-1121P	1.34455e-06	0.803184
RNU6-120P	1.34455e-06	0.803184
RNU6-1298P	1.34455e-06	0.803184
RNU6-1299P	1.34455e-06	0.803184
RNU6-1301P	1.34455e-06	0.803184
RNU6-160P	1.34455e-06	0.803184
RNU6-308P	1.34455e-06	0.803184
RNU6-331P	1.34455e-06	0.803184
RNU6-483P	1.34455e-06	0.803184
RNU6-528P	1.34455e-06	0.803184
RNU6-615P	1.34455e-06	0.803184
RNU6-628P	1.34455e-06	0.803184
RNU6-62P	1.34455e-06	0.803184
RNU6-64P	1.34455e-06	0.803184
RNU6-677P	1.34455e-06	0.803184
RNU6-740P	1.34455e-06	0.803184
RNU6-903P	1.34455e-06	0.803184
RNU6-972P	1.34455e-06	0.803184
RNU6ATAC40P	1.34455e-06	0.803184
RNU7-120P	1.34455e-06	0.803184
RPL12P18	1.34455e-06	0.803184
RPL39P6	1.34455e-06	0.803184
RPS26P34	1.34455e-06	0.803184
RPS29P22	1.34455e-06	0.803184
RPS29P23	1.34455e-06	0.803184
SLC25A20P1	1.34455e-06	0.803184
SPDYE9P	1.34455e-06	0.803184
SRP68P2	1.34455e-06	0.803184
TOMM22P5	1.34455e-06	0.803184
TRAV37	1.34455e-06	0.803184
TRAV8-7	1.34455e-06	0.803184
TUBB4AP1	1.34455e-06	0.803184
USP17L1	1.34455e-06	0.803184
Z97056.3	1.34455e-06	0.803184
AC021074.2	1.34455e-06	0.803184
AC068397.1	1.34455e-06	0.803184
AC239367.3	1.34455e-06	0.803184
AL513475.1	1.34455e-06	0.803184
AL590365.1	1.34455e-06	0.803184
MLLT10P1	1.34455e-06	0.803184
OR2AI1P	1.34455e-06	0.803184
RN7SL78P	1.34455e-06	0.803184
RNU6-216P	1.34455e-06	0.803184
RNU6-508P	1.34455e-06	0.803184
RNU6-623P	1.34455e-06	0.803184
RNU6-686P	1.34455e-06	0.803184
RNU6ATAC17P	1.34455e-06	0.803184
RNU7-63P	1.34455e-06	0.803184
AC103563.8	1.34455e-06	0.803184
LINC01691	1.34455e-06	0.803184
RPL12P47	1.34455e-06	0.803184
AC006946.1	1.35023e-06	0.803105
PRL	1.35261e-06	0.803072
AC017028.2	1.35298e-06	0.803067
LINC00163	1.36636e-06	0.802881
AL450263.1	1.367e-06	0.802872
AC016866.3	1.36729e-06	0.802868
SEC14L3	1.37038e-06	0.802826
AF241728.1	1.37328e-06	0.802786
AC005336.2	1.37584e-06	0.802751
GPR174	1.37894e-06	0.802708
TMEM26-AS1	1.3801e-06	0.802693
FAM90A20P	1.38892e-06	0.802572
AC009533.2	1.39608e-06	0.802475
RAET1K	1.39959e-06	0.802428
SALL3	1.39984e-06	0.802424
UNC5A	1.4001e-06	0.802421
AC144450.1	1.40464e-06	0.80236
IGHV3-47	1.40949e-06	0.802295
MCHR1	1.41156e-06	0.802267
RPL23AP90	1.42792e-06	0.802049
AC023510.2	1.44253e-06	0.801856
AC009237.8	1.44848e-06	0.801778
AC233976.2	1.45087e-06	0.801747
AC073850.1	1.47017e-06	0.801496
CLCP2	1.47627e-06	0.801417
AC010834.3	1.48173e-06	0.801347
CDCA4P1	1.48441e-06	0.801313
FGF14-AS1	1.48668e-06	0.801284
LINC02315	1.50851e-06	0.801006
PKDREJ	1.52481e-06	0.800801
AC125494.1	1.52837e-06	0.800757
FRMPD4	1.53301e-06	0.800699
AC072022.1	1.53682e-06	0.800652
OR10R3P	1.55591e-06	0.800416
IGHV3-19	1.55939e-06	0.800373
LAMTOR3P2	1.56367e-06	0.800321
ROPN1B	1.56512e-06	0.800303
VN1R20P	1.57065e-06	0.800236
PRSS1	1.57236e-06	0.800215
RNU7-49P	1.59184e-06	0.799979
MTCO2P1	1.60596e-06	0.79981
RNU4-89P	1.60596e-06	0.79981
KRT18P39	1.60659e-06	0.799803
LINC02244	1.61568e-06	0.799695
IGHV3-16	1.6317e-06	0.799505
MIR4261	1.64458e-06	0.799354
CYP11B1	1.65244e-06	0.799262
RETNLB	1.6541e-06	0.799243
AL670729.3	1.67635e-06	0.798986
AC109462.3	1.67833e-06	0.798963
RNA5SP394	1.7104e-06	0.798598
AC148477.9	1.71237e-06	0.798576
LINC00029	1.72444e-06	0.798441
NPM1P33	1.73072e-06	0.79837
TSPAN11	1.73131e-06	0.798364
ACTBP1	1.74383e-06	0.798224
HLA-DPA2	1.75109e-06	0.798144
AC026336.4	1.75222e-06	0.798131
MTND4P15	1.7669e-06	0.79797
SELENOOLP	1.78926e-06	0.797726
TRARG1	1.80853e-06	0.797518
AC008013.3	1.81275e-06	0.797473
AC009812.3	1.81323e-06	0.797468
AL161725.1	1.82836e-06	0.797307
CYP2A6	1.85481e-06	0.797027
PRSS3P1	1.85668e-06	0.797008
PHGR1	1.85923e-06	0.796981
SLC31A1P1	1.85969e-06	0.796976
CCR8	1.86787e-06	0.796891
AC023494.1	1.899e-06	0.796568
AC136601.2	1.89908e-06	0.796567
OR5K2	1.91504e-06	0.796404
AC073569.1	1.92644e-06	0.796288
LAT	1.9344e-06	0.796208
RNU6V	1.93843e-06	0.796167
AC073476.1	1.95795e-06	0.795971
GPAT2P2	1.98247e-06	0.795727
AC245187.1	1.99257e-06	0.795627
FAM9C	1.99451e-06	0.795608
AC020895.2	2.00585e-06	0.795497
VAMP4	2.00993e-06	0.795457
DOK6	2.02156e-06	0.795344
AKR7A2P1	2.02567e-06	0.795304
GNG13	2.02647e-06	0.795296
AC025917.1	2.03393e-06	0.795224
AC090826.3	2.05436e-06	0.795027
AL450306.1	2.05963e-06	0.794977
SMAD9	2.06077e-06	0.794966
AC090607.1	2.07497e-06	0.794831
AC061708.1	2.08269e-06	0.794757
HS3ST1	2.08279e-06	0.794757
AC022215.2	2.09676e-06	0.794625
AC099811.4	2.1004e-06	0.79459
RNA5SP39	2.10376e-06	0.794559
AL031778.1	2.12088e-06	0.794399
AL138831.3	2.12576e-06	0.794354
KCTD11	2.12765e-06	0.794336
PRR7-AS1	2.14251e-06	0.794198
AC027514.2	2.16596e-06	0.793983
AC141557.2	2.16674e-06	0.793976
AC243428.1	2.1683e-06	0.793962
AL512791.1	2.17317e-06	0.793917
RN7SL684P	2.18814e-06	0.793781
C5orf58	2.20097e-06	0.793666
AC007262.1	2.21889e-06	0.793505
LINC01547	2.22978e-06	0.793408
RNU6-595P	2.23229e-06	0.793385
CENPUP2	2.2336e-06	0.793374
AL662844.3	2.23805e-06	0.793334
AC073349.4	2.24175e-06	0.793301
AC000123.1	2.25974e-06	0.793142
AL133499.1	2.27256e-06	0.79303
RNA5SP103	2.27256e-06	0.79303
AP001010.1	2.2842e-06	0.792928
AC233280.2	2.28681e-06	0.792905
AC007537.1	2.34117e-06	0.792437
AC139769.2	2.34117e-06	0.792437
MTCO2P5	2.34117e-06	0.792437
RGS17	2.37665e-06	0.792137
AC079584.2	2.39525e-06	0.791981
LINC01354	2.39725e-06	0.791964
TBC1D31	2.41135e-06	0.791847
AL589880.1	2.41281e-06	0.791835
PLCH1-AS2	2.43816e-06	0.791625
AC078918.1	2.43896e-06	0.791619
RPL12P29	2.44776e-06	0.791546
AC114878.2	2.47276e-06	0.791343
AL133371.1	2.48858e-06	0.791214
LINC01656	2.50034e-06	0.79112
AC026771.1	2.50317e-06	0.791097
AC010325.3	2.50479e-06	0.791084
SLC12A1	2.57097e-06	0.790559
AL158166.2	2.58211e-06	0.790472
AC069282.1	2.58724e-06	0.790432
AC100821.1	2.61106e-06	0.790247
AC123512.1	2.61844e-06	0.79019
AC136475.10	2.63447e-06	0.790066
AC104335.1	2.6483e-06	0.789961
AC105450.1	2.77332e-06	0.789025
AL357874.2	2.83964e-06	0.788544
AC005699.1	2.85096e-06	0.788463
AC006238.2	2.85858e-06	0.788409
AC022893.3	2.87837e-06	0.788268
AC115989.1	2.88081e-06	0.788251
TRBJ2-4	2.90015e-06	0.788114
AL137779.1	2.94446e-06	0.787804
A2MP1	2.97859e-06	0.787569
MLN	2.99571e-06	0.787451
MAPK9	3.0018e-06	0.787409
LYST-AS1	3.0236e-06	0.787261
MIR635	3.04371e-06	0.787125
AL662884.5	3.06614e-06	0.786974
AC010542.5	3.07406e-06	0.786921
PPIAP7	3.08468e-06	0.78685
AL359694.1	3.11365e-06	0.786658
AL035413.1	3.11838e-06	0.786627
AP001432.1	3.20379e-06	0.78607
AC096586.2	3.21501e-06	0.785998
RNU6-415P	3.25722e-06	0.785728
FOXB1	3.26584e-06	0.785673
CEP164P1	3.26895e-06	0.785654
IL24	3.27641e-06	0.785607
MIR548Q	3.31714e-06	0.785351
RF00072	3.32025e-06	0.785331
RF00586	3.33124e-06	0.785263
AC132216.1	3.4205e-06	0.784714
PGM5P2	3.46303e-06	0.784457
HIGD1AP18	3.46698e-06	0.784433
AL390961.1	3.49717e-06	0.784252
AC018695.9	3.51454e-06	0.784149
CDHR1	3.51464e-06	0.784149
AC005532.2	3.53718e-06	0.784015
RNU6-1333P	3.58166e-06	0.783754
AP000942.1	3.60361e-06	0.783627
AL512413.1	3.60499e-06	0.783619
AC004112.1	3.63467e-06	0.783447
RNA5SP494	3.64336e-06	0.783397
RNA5SP297	3.64603e-06	0.783382
AC025040.1	3.66248e-06	0.783287
MTFR1	3.67185e-06	0.783234
HMGN2P31	3.68117e-06	0.783181
HMGB3P24	3.68501e-06	0.783159
AC006059.1	3.71059e-06	0.783014
DIMT1	3.72556e-06	0.782929
AC008731.1	3.76671e-06	0.782699
FAM217A	3.76903e-06	0.782686
RNU7-20P	3.8283e-06	0.782358
AC136601.1	3.82957e-06	0.782351
Z99129.1	3.84425e-06	0.78227
IL31	3.85934e-06	0.782188
AC011370.1	3.93118e-06	0.781799
EMX1	3.99239e-06	0.781472
AL035071.2	3.99413e-06	0.781463
RNU6-1257P	4.02227e-06	0.781315
AL031846.2	4.03026e-06	0.781273
RNU6-850P	4.03615e-06	0.781242
AC099850.3	4.04385e-06	0.781202
AC018371.1	4.11399e-06	0.780837
AC093110.1	4.12096e-06	0.780801
AC103879.1	4.1269e-06	0.780771
AL133227.1	4.15506e-06	0.780626
TRAV8-5	4.25703e-06	0.780111
THOC7-AS1	4.36651e-06	0.779569
RALGPS1	4.37536e-06	0.779526
AC130366.1	4.45235e-06	0.779153
HP1BP3	4.49248e-06	0.778961
AC024560.2	4.49474e-06	0.778951
OR10Z1	4.60118e-06	0.778449
AC106738.2	4.63159e-06	0.778307
AC005324.3	4.65091e-06	0.778218
SOD1P3	4.71677e-06	0.777915
AL137789.1	4.72717e-06	0.777868
GIMAP3P	4.72751e-06	0.777866
AC092916.2	4.78602e-06	0.777601
ZNF32-AS2	4.82126e-06	0.777443
AL162231.4	4.87147e-06	0.777219
C8orf86	4.88651e-06	0.777152
TGM4	4.9124e-06	0.777038
ETFBKMT	4.93231e-06	0.776951
RNA5SP527	4.93341e-06	0.776946
RNU6-262P	4.93341e-06	0.776946
TRBV30	4.958e-06	0.776838
AC067817.2	5.00516e-06	0.776633
AC080038.4	5.09236e-06	0.776259
AL449283.1	5.11246e-06	0.776173
AC005104.1	5.13335e-06	0.776084
POLR3GP1	5.21485e-06	0.775742
AC009087.1	5.27742e-06	0.775482
OR5BK1P	5.27742e-06	0.775482
AC111170.1	5.30948e-06	0.77535
TRPC5	5.31397e-06	0.775332
AC090666.1	5.33011e-06	0.775265
RNA5SP37	5.33686e-06	0.775238
AC024937.3	5.45264e-06	0.774769
PVRIG	5.47246e-06	0.77469
ASB14	5.47562e-06	0.774677
AC007132.1	5.52945e-06	0.774463
AC009108.1	5.53223e-06	0.774452
JPH3	5.59783e-06	0.774193
TBC1D3F	5.59883e-06	0.774189
AC092042.4	5.74262e-06	0.773632
AC068057.1	5.79107e-06	0.773447
RNU6-476P	5.81363e-06	0.773362
LINC02625	5.86637e-06	0.773163
AC107398.2	5.87756e-06	0.773121
AC084357.2	5.92122e-06	0.772957
AL158032.1	5.95347e-06	0.772837
RNU6-335P	5.95347e-06	0.772837
AC093162.2	5.97163e-06	0.77277
ASS1P12	6.09726e-06	0.77231
HSPA12B	6.17137e-06	0.772042
DNAJB13	6.22612e-06	0.771846
AC105339.5	6.22897e-06	0.771836
TOX2	6.32963e-06	0.77148
AC087854.1	6.38693e-06	0.771279
AL139352.1	6.41891e-06	0.771168
POU5F1P3	6.42677e-06	0.771141
CORO2A	6.49158e-06	0.770917
AC006199.1	6.5077e-06	0.770862
RF00394	6.56449e-06	0.770668
AC135068.2	6.62576e-06	0.77046
AL355075.2	6.66264e-06	0.770336
AC073349.2	6.70321e-06	0.770201
AC116348.1	6.74149e-06	0.770073
NTM-AS1	6.77166e-06	0.769973
AP002340.1	7.04766e-06	0.769076
AC234782.4	7.08853e-06	0.768946
IGHV1-17	7.15909e-06	0.768723
AC009950.1	7.17444e-06	0.768675
PAXBP1-AS1	7.2386e-06	0.768474
GRIN3A	7.29059e-06	0.768312
AC245100.2	7.30783e-06	0.768259
RNU7-18P	7.31074e-06	0.76825
NPM1P26	7.32337e-06	0.768211
FGF22	7.33995e-06	0.76816
AL136310.1	7.48338e-06	0.767722
KRT74	7.61272e-06	0.767333
NTM	7.65485e-06	0.767208
RPL9P2	7.78622e-06	0.766821
SHISA2	7.79157e-06	0.766806
MAGOH2P	7.79355e-06	0.7668
RNU6-722P	7.84823e-06	0.766641
ATP6V1C2	7.88028e-06	0.766548
AC092881.2	7.89376e-06	0.766509
SH2D7	7.99666e-06	0.766214
PPP1R27	8.01745e-06	0.766154
C12orf71	8.20046e-06	0.765639
USP17L2	8.21491e-06	0.765598
C1orf146	8.30606e-06	0.765346
RNU6-1149P	8.38439e-06	0.765131
RNU6-422P	8.38439e-06	0.765131
AC132219.2	8.40571e-06	0.765072
AC066613.1	8.40615e-06	0.765071
OGDHL	8.47429e-06	0.764886
AL357143.1	8.47597e-06	0.764881
RNU7-61P	8.48096e-06	0.764868
CLDN2	8.57059e-06	0.764626
AL139396.1	8.6886e-06	0.764311
AC026470.3	8.72496e-06	0.764215
AL591806.2	8.75068e-06	0.764147
AL133373.2	8.86331e-06	0.763852
TRBVA	8.89404e-06	0.763773
AL136368.1	8.96411e-06	0.763591
ABCA4	9.01942e-06	0.763449
AC016721.1	9.08914e-06	0.763271
AC078916.1	9.08914e-06	0.763271
AC087045.1	9.08914e-06	0.763271
AC096659.1	9.08914e-06	0.763271
AC113404.2	9.08914e-06	0.763271
AC234781.4	9.08914e-06	0.763271
AL358216.1	9.08914e-06	0.763271
CDH12P1	9.08914e-06	0.763271
FOXS1	9.08914e-06	0.763271
RNU6-584P	9.08914e-06	0.763271
RNU6-922P	9.08914e-06	0.763271
RPL29P29	9.08914e-06	0.763271
S1PR3	9.28597e-06	0.762774
AFAP1L1	9.34077e-06	0.762638
ETV5-AS1	9.35028e-06	0.762614
WASHC5-AS1	9.47272e-06	0.762312
AC079781.2	9.51593e-06	0.762206
AC084018.1	9.5271e-06	0.762179
NCAPD2	9.63505e-06	0.761917
AC011342.1	9.65204e-06	0.761876
PLCH1	9.7262e-06	0.761697
TRIM26BP	9.7338e-06	0.761679
AL360020.1	9.82796e-06	0.761454
OR13C6P	9.86221e-06	0.761373
DIO2-AS1	9.89807e-06	0.761288
AC108134.4	9.93225e-06	0.761208
FTOP1	9.95066e-06	0.761164
RPS3AP53	1.00411e-05	0.760953
EIF4EBP2	1.0043e-05	0.760948
AC009090.6	1.00963e-05	0.760824
AC114760.2	1.01574e-05	0.760683
AC006130.1	1.02215e-05	0.760536
RNU6-897P	1.04688e-05	0.759974
GLYATL1B	1.05245e-05	0.759849
AL359317.1	1.05507e-05	0.759791
AC124798.2	1.06084e-05	0.759662
AC022784.5	1.06982e-05	0.759464
AP001458.1	1.07957e-05	0.75925
LINC00612	1.0875e-05	0.759077
AL035696.3	1.09106e-05	0.759
AC022960.1	1.0927e-05	0.758965
LAPTM4BP1	1.09421e-05	0.758932
LHFPL5	1.09607e-05	0.758892
AC026412.3	1.09915e-05	0.758826
NUAK1	1.11048e-05	0.758583
TTC16	1.11686e-05	0.758447
AC124862.1	1.11993e-05	0.758382
AL445435.1	1.12598e-05	0.758255
CR769775.1	1.12842e-05	0.758203
MIR4257	1.12842e-05	0.758203
RNU6-675P	1.12842e-05	0.758203
ERICH6B	1.13356e-05	0.758096
LINC01338	1.17186e-05	0.757306
ZC2HC1C	1.1796e-05	0.757149
HNRNPA1P17	1.18281e-05	0.757084
AL158011.1	1.19025e-05	0.756935
SAP30L	1.19502e-05	0.756839
NEK9	1.19614e-05	0.756817
AC011825.2	1.20074e-05	0.756725
CICP27	1.202e-05	0.7567
AL138921.2	1.23935e-05	0.755968
AVPR2	1.23966e-05	0.755962
ITFG1-AS1	1.25555e-05	0.755657
RNU6-539P	1.25748e-05	0.75562
AC022274.1	1.26409e-05	0.755494
PMEL	1.26479e-05	0.755481
MIR6722	1.26527e-05	0.755472
RF00593	1.26527e-05	0.755472
TRBV5-4	1.27173e-05	0.755349
ASCL5	1.31035e-05	0.754629
OGFR-AS1	1.31085e-05	0.75462
AC008667.3	1.31362e-05	0.754569
UGT2B11	1.32307e-05	0.754396
FAM90A24P	1.33194e-05	0.754235
LINC00452	1.33279e-05	0.75422
FLG	1.33744e-05	0.754136
SMIM36	1.34024e-05	0.754085
TRIM46	1.35054e-05	0.7539
AC007952.9	1.35217e-05	0.75387
RPL12P15	1.35839e-05	0.75376
AC106865.2	1.36322e-05	0.753673
AC019084.1	1.36899e-05	0.753571
AJ011931.2	1.39071e-05	0.753189
AL157832.2	1.40477e-05	0.752945
ATP5PDP4	1.42436e-05	0.752608
OR10R2	1.43125e-05	0.752491
AL365356.1	1.44781e-05	0.752211
BOLL	1.44801e-05	0.752207
AL645941.2	1.45822e-05	0.752036
AC087763.1	1.45988e-05	0.752008
RNU6-1153P	1.48516e-05	0.751589
B3GAT2	1.48816e-05	0.751539
MTCO3P29	1.49572e-05	0.751415
LINC02405	1.49711e-05	0.751392
GPM6B	1.50509e-05	0.751262
LDHAL6A	1.53929e-05	0.750711
AL590282.1	1.56477e-05	0.750308
AC009554.2	1.57107e-05	0.750209
F3	1.57942e-05	0.750079
AC004231.3	1.58249e-05	0.750031
HSPE1P20	1.59865e-05	0.74978
AC096564.2	1.60332e-05	0.749708
NBAT1	1.61038e-05	0.7496
AC073254.1	1.61729e-05	0.749494
KRT2	1.62507e-05	0.749376
AL161756.2	1.62563e-05	0.749367
AL603839.2	1.62563e-05	0.749367
RNU6-915P	1.62563e-05	0.749367
TRBV7-5	1.63951e-05	0.749157
LINC01163	1.64069e-05	0.749139
AC015987.1	1.64277e-05	0.749108
MTND4P26	1.67621e-05	0.748609
AL049552.1	1.68002e-05	0.748553
FGFR1	1.68911e-05	0.748419
LMO7-AS1	1.69311e-05	0.74836
AP003392.2	1.70258e-05	0.748222
AL356750.1	1.70946e-05	0.748122
CACFD1	1.71236e-05	0.748079
AL121839.1	1.71403e-05	0.748055
BCL7A	1.72408e-05	0.74791
DIO2	1.72947e-05	0.747832
CACNB2	1.75732e-05	0.747434
SCAT2	1.7641e-05	0.747338
EFCAB14-AS1	1.78114e-05	0.747099
Z95152.1	1.7837e-05	0.747063
AC099782.2	1.79222e-05	0.746944
AHNAK2	1.79361e-05	0.746924
AC124014.1	1.79995e-05	0.746836
AL590282.2	1.80594e-05	0.746753
AC015660.2	1.80891e-05	0.746712
RNY1P13	1.80987e-05	0.746699
AC010761.4	1.8133e-05	0.746651
AC091849.1	1.82664e-05	0.746468
PGLYRP4	1.8286e-05	0.746441
DDX18P1	1.8321e-05	0.746393
AC138956.1	1.83954e-05	0.746292
AL049869.3	1.84252e-05	0.746251
ZNF32-AS1	1.8438e-05	0.746234
AC006539.2	1.85165e-05	0.746127
AL133406.2	1.86009e-05	0.746013
PFN1P6	1.87437e-05	0.745821
AC016866.1	1.87829e-05	0.745769
CEBPE	1.88189e-05	0.745721
SLC36A3	1.88387e-05	0.745694
AC087521.2	1.88444e-05	0.745687
MTMR7	1.88511e-05	0.745678
AC006960.2	1.88816e-05	0.745637
AC005154.4	1.88918e-05	0.745624
AC109462.2	1.89671e-05	0.745524
AL627309.2	1.90309e-05	0.745439
AC092338.2	1.90904e-05	0.745361
AL009028.1	1.91077e-05	0.745338
TEX53	1.91606e-05	0.745268
LAIR1	1.95122e-05	0.74481
AC015971.1	1.98583e-05	0.744366
PRKCZ	1.99056e-05	0.744306
AC022973.4	1.99637e-05	0.744232
WDR88	1.99817e-05	0.744209
VN1R5	2.01049e-05	0.744054
SLC25A35	2.01452e-05	0.744003
AL360093.1	2.0386e-05	0.743702
NPIPB7	2.04757e-05	0.743591
AC022272.1	2.04837e-05	0.743581
MARCH9	2.07379e-05	0.743268
EDRF1-AS1	2.09385e-05	0.743023
AC114982.1	2.09803e-05	0.742973
CALB1	2.09897e-05	0.742961
UBASH3A	2.10535e-05	0.742884
CR769776.2	2.11039e-05	0.742823
AC024475.1	2.13931e-05	0.742477
TMCO5B	2.15849e-05	0.742249
AC007179.1	2.1585e-05	0.742249
MTND5P28	2.17056e-05	0.742107
YBX2P1	2.18059e-05	0.741989
AL033519.4	2.18306e-05	0.74196
PZP	2.19503e-05	0.74182
AL049733.1	2.20355e-05	0.741721
AC007450.3	2.20355e-05	0.741721
AC008993.1	2.20355e-05	0.741721
AC019254.2	2.20355e-05	0.741721
MIR194-1	2.20355e-05	0.741721
MIR302A	2.20355e-05	0.741721
AL606489.1	2.23111e-05	0.741403
MTND4P23	2.24494e-05	0.741245
HOMER2P2	2.29068e-05	0.740727
AL137779.3	2.2927e-05	0.740705
TRGV3	2.2976e-05	0.74065
LINC02295	2.30661e-05	0.740549
AL592435.2	2.3087e-05	0.740526
AC005972.1	2.31893e-05	0.740412
AC245517.5	2.31893e-05	0.740412
RBPMS2P1	2.31893e-05	0.740412
AL121906.1	2.3284e-05	0.740307
AC012170.2	2.34399e-05	0.740135
RN7SKP275	2.35379e-05	0.740028
USP20	2.36184e-05	0.73994
FTLP15	2.37787e-05	0.739765
TRGV1	2.41913e-05	0.739321
Z85996.1	2.42599e-05	0.739248
AL157935.1	2.44466e-05	0.73905
AL928970.1	2.5045e-05	0.738423
INSL6	2.51913e-05	0.738272
AC023825.2	2.52334e-05	0.738228
RNU6-644P	2.52917e-05	0.738168
AC007881.4	2.54232e-05	0.738033
FBXW7-AS1	2.54602e-05	0.737996
AC018904.1	2.55264e-05	0.737928
AL078612.2	2.57562e-05	0.737695
PHF2	2.63389e-05	0.737112
DDIT4L	2.64418e-05	0.73701
AMPH	2.65267e-05	0.736926
AC004908.1	2.67048e-05	0.736751
AHCYP2	2.71457e-05	0.736323
RBM12B-AS1	2.7231e-05	0.73624
ARL13A	2.73523e-05	0.736124
ACMSD	2.74571e-05	0.736024
AC097713.3	2.77022e-05	0.73579
DNM1P51	2.77979e-05	0.7357
AC090627.1	2.78867e-05	0.735616
AC113189.3	2.79767e-05	0.735531
AP005899.1	2.80717e-05	0.735442
AC025048.3	2.83006e-05	0.735229
AC104472.2	2.83006e-05	0.735229
MARK2P6	2.83006e-05	0.735229
MIR1827	2.83006e-05	0.735229
RNU1-23P	2.83006e-05	0.735229
AC084855.2	2.84234e-05	0.735115
AL118556.1	2.84365e-05	0.735102
AC023787.1	2.84716e-05	0.73507
AC244102.3	2.86433e-05	0.734912
RNA5SP290	2.87399e-05	0.734823
AC063952.2	2.8959e-05	0.734622
MMP11	2.91849e-05	0.734417
SLFN5	2.92248e-05	0.734381
AL157402.2	2.95899e-05	0.734053
AC021613.1	2.96126e-05	0.734033
AC010889.1	3.01356e-05	0.733569
AC022404.1	3.02655e-05	0.733455
AL033397.2	3.06493e-05	0.73312
RAB11FIP1P1	3.07238e-05	0.733056
AC026412.2	3.10444e-05	0.73278
AC069431.2	3.11544e-05	0.732686
TSHB	3.17213e-05	0.732205
C4B	3.17266e-05	0.732201
MVB12B	3.18046e-05	0.732135
FAM205A	3.20072e-05	0.731966
TPO	3.21516e-05	0.731846
GRIN3B	3.25216e-05	0.73154
FNBP1	3.25869e-05	0.731486
CHST2	3.2606e-05	0.73147
EIF4EP1	3.26715e-05	0.731417
AL603756.1	3.30036e-05	0.731146
AC092620.2	3.33932e-05	0.730831
DND1P1	3.37337e-05	0.730559
HSDL1	3.42554e-05	0.730146
MTATP6P26	3.4316e-05	0.730099
RN7SL762P	3.44926e-05	0.72996
LINC02153	3.45035e-05	0.729952
PLN	3.47109e-05	0.72979
DPPA2P1	3.50983e-05	0.729491
AL354989.1	3.5113e-05	0.72948
AC107871.1	3.54588e-05	0.729215
AC010531.3	3.55397e-05	0.729154
AP000593.3	3.58366e-05	0.728929
AL160287.1	3.58837e-05	0.728893
AC008507.2	3.5914e-05	0.72887
AC009119.3	3.59973e-05	0.728808
C3orf70	3.61479e-05	0.728695
PPIAP91	3.63085e-05	0.728574
BCL9	3.64104e-05	0.728499
NODAL	3.65102e-05	0.728424
CD84	3.65874e-05	0.728367
PIANP	3.75176e-05	0.727685
SHISA9	3.77069e-05	0.727548
PAX8	3.79413e-05	0.72738
AC141930.2	3.7974e-05	0.727356
B4GALT4-AS1	3.79861e-05	0.727347
ETDA	3.81492e-05	0.727231
AC007336.2	3.81515e-05	0.727229
AC004585.1	3.82092e-05	0.727188
RN7SL841P	3.82424e-05	0.727164
AL033528.1	3.82766e-05	0.72714
AC079880.1	3.82795e-05	0.727138
RAB15	3.82995e-05	0.727124
KCNH2	3.84781e-05	0.726997
MIR503	3.84944e-05	0.726985
AC097448.1	3.8536e-05	0.726956
SERPINE3	3.89764e-05	0.726645
CR786580.1	3.90459e-05	0.726597
OSBPL5	3.90769e-05	0.726575
MOSMO	3.92048e-05	0.726486
AC105129.3	3.93871e-05	0.726359
AL137013.1	3.97088e-05	0.726136
GRK3	4.01452e-05	0.725837
CA14	4.06423e-05	0.725499
SPIN1	4.07745e-05	0.72541
LINC00605	4.12972e-05	0.72506
AL137009.1	4.13968e-05	0.724994
PTTG4P	4.24587e-05	0.724296
ANGPTL1	4.30521e-05	0.723913
AC093642.1	4.33493e-05	0.723722
AC013452.2	4.33827e-05	0.723701
AC024257.2	4.40171e-05	0.723299
DDX39BP2	4.43941e-05	0.723063
AC116348.3	4.45467e-05	0.722968
AC103739.2	4.50177e-05	0.722676
PCDHGA2	4.54306e-05	0.722422
PRR15L	4.56048e-05	0.722315
FAM230G	4.58816e-05	0.722147
AL365361.1	4.59433e-05	0.722109
AC024896.1	4.59479e-05	0.722107
RAB28P5	4.60927e-05	0.722019
AP001793.1	4.636e-05	0.721858
MYCBP2-AS1	4.65726e-05	0.72173
AF131216.1	4.65866e-05	0.721722
UBE2FP3	4.66139e-05	0.721705
TRBV10-2	4.76463e-05	0.721094
BNIP3P10	4.83688e-05	0.720672
AC010531.5	4.8376e-05	0.720668
TTC4P1	4.84922e-05	0.720601
AC009977.1	4.89955e-05	0.720311
RNA5SP390	4.8997e-05	0.72031
PPIAP53	4.98193e-05	0.719843
HCG9	5.0556e-05	0.71943
AC004263.2	5.08972e-05	0.71924
AC113410.1	5.18341e-05	0.718726
LINC02495	5.20038e-05	0.718633
RMDN1	5.22058e-05	0.718524
DUOX1	5.2249e-05	0.7185
MKNK1-AS1	5.26635e-05	0.718277
GSK3B	5.26695e-05	0.718273
AC124944.1	5.27228e-05	0.718245
PRKCZ-AS1	5.27501e-05	0.71823
NANOGP7	5.2873e-05	0.718164
AC092953.2	5.32806e-05	0.717947
CATSPERB	5.35583e-05	0.717799
AC009090.3	5.36176e-05	0.717768
AC069542.1	5.38252e-05	0.717658
AC010468.2	5.39342e-05	0.717601
STAU2-AS1	5.42076e-05	0.717457
AC006378.1	5.44192e-05	0.717347
NME9	5.46215e-05	0.717241
AC100782.1	5.52079e-05	0.716938
AC012467.1	5.54924e-05	0.716791
AC010542.1	5.55115e-05	0.716782
CCDC85C	5.5613e-05	0.716729
AC015660.1	5.57555e-05	0.716657
AC124944.3	5.57691e-05	0.71665
PRKAB1	5.66132e-05	0.716221
TXLNGY	5.70088e-05	0.716022
AC079052.1	5.73174e-05	0.715868
AC006445.2	5.84306e-05	0.715318
AC112907.3	5.87267e-05	0.715173
HEPACAM	5.87575e-05	0.715158
AC007687.1	5.87939e-05	0.71514
AC098484.4	5.9128e-05	0.714977
AC004584.1	5.92268e-05	0.714929
AC007450.2	5.92576e-05	0.714915
MASP2	6.01205e-05	0.714499
RNF39	6.06178e-05	0.714262
SIDT1-AS1	6.09237e-05	0.714117
C11orf97	6.13405e-05	0.713921
SOX15	6.16588e-05	0.713772
AC138473.1	6.17391e-05	0.713734
AL356000.1	6.21273e-05	0.713553
GPR152	6.23671e-05	0.713442
LINC02593	6.24383e-05	0.713409
RNF32	6.26291e-05	0.713321
AL121974.1	6.28849e-05	0.713203
AL445309.1	6.29909e-05	0.713155
AC073130.2	6.33942e-05	0.71297
AC001226.2	6.34611e-05	0.71294
AC018653.3	6.38197e-05	0.712777
AC007695.1	6.38565e-05	0.71276
ASB1	6.38851e-05	0.712747
C1QTNF7	6.43026e-05	0.712558
AC104841.1	6.44298e-05	0.712501
AP001107.4	6.49823e-05	0.712253
AC245060.6	6.64823e-05	0.71159
AL353729.2	6.66301e-05	0.711526
RPL17P17	6.66301e-05	0.711526
OLFM2	6.73205e-05	0.711225
TATDN2P2	6.74365e-05	0.711175
Z97652.1	6.77118e-05	0.711056
AC007285.2	6.79034e-05	0.710974
AP000346.4	6.81251e-05	0.710879
PDE6B	6.8149e-05	0.710869
AC023510.1	6.87611e-05	0.710608
AC024361.3	6.885e-05	0.71057
AC026979.1	6.88914e-05	0.710552
KRT1	6.9081e-05	0.710472
SDCBP2-AS1	6.9183e-05	0.710429
ICK	6.97553e-05	0.710188
AC094019.1	7.00082e-05	0.710082
LIN28A	7.00679e-05	0.710057
MEIOB	7.02917e-05	0.709964
LINC01890	7.03733e-05	0.70993
AC046130.2	7.07439e-05	0.709776
MYO1A	7.09563e-05	0.709688
GBP1P1	7.10672e-05	0.709642
PREX2	7.13251e-05	0.709536
SLC4A9	7.21478e-05	0.709199
FBXW2	7.22505e-05	0.709157
AL445991.1	7.27665e-05	0.708948
CAB39L	7.30733e-05	0.708824
MIR200A	7.3121e-05	0.708805
AL354977.1	7.37793e-05	0.708541
ZNF885P	7.48172e-05	0.708129
SLC27A6	7.48505e-05	0.708116
CREB1	7.56097e-05	0.707818
AC004765.1	7.59788e-05	0.707674
AL136084.3	7.63658e-05	0.707524
ZNF839P1	7.66601e-05	0.70741
ALG13-AS1	7.67273e-05	0.707384
SNX6P1	7.68705e-05	0.707329
MTND5P1	7.72613e-05	0.707179
AC135178.3	7.75746e-05	0.707059
AC011815.3	7.80135e-05	0.706892
AC007381.2	7.84304e-05	0.706734
AC103858.1	7.89614e-05	0.706533
AMIGO1	7.9e-05	0.706519
SRP14P4	8.0338e-05	0.70602
LINC01287	8.03933e-05	0.705999
ECEL1P3	8.09142e-05	0.705807
AF305872.2	8.1158e-05	0.705717
LINC00939	8.12188e-05	0.705695
AC025034.1	8.42232e-05	0.70461
AP001107.6	8.49043e-05	0.704369
CDRT15	8.62436e-05	0.703899
AP001001.1	8.69916e-05	0.70364
AC027627.1	8.87558e-05	0.703036
AC098935.1	8.89478e-05	0.702971
MICD	8.90619e-05	0.702932
AL031595.2	8.94218e-05	0.702811
HNRNPA1P68	9.07006e-05	0.702382
TMC3	9.07302e-05	0.702372
AL137856.1	9.15275e-05	0.702108
DQX1	9.21216e-05	0.701912
MAP10	9.26662e-05	0.701734
AL592164.2	9.27341e-05	0.701712
KRT16P4	9.32202e-05	0.701553
AC025370.2	9.35972e-05	0.701431
PCP4L1	9.36713e-05	0.701407
AL355864.2	9.44976e-05	0.701141
HMGB3P14	9.46981e-05	0.701076
AC009365.3	9.54893e-05	0.700824
EFEMP1	9.56873e-05	0.700761
TCF7	9.66413e-05	0.700459
NT5C1B	9.67511e-05	0.700424
DGUOK-AS1	9.70702e-05	0.700324
ZNF878	9.72152e-05	0.700279
AL157369.1	9.78878e-05	0.700069
GPR61	9.79092e-05	0.700062
AC005740.3	9.86908e-05	0.69982
AC002563.1	9.89385e-05	0.699743
ADORA2B	9.96023e-05	0.699539
AC009927.1	0.0001005	0.699265
MIR646HG	0.000100527	0.699256
AC125611.4	0.000101426	0.698984
LINC00494	0.000101603	0.698931
AC136475.8	0.00010239	0.698694
LINC01793	0.00010278	0.698578
AC090618.1	0.000103972	0.698224
TERB2	0.000104947	0.697937
AQP3	0.000105384	0.697809
AC092053.1	0.000105681	0.697723
MEIOC	0.00010577	0.697697
TMEM56-RWDD3	0.000106004	0.697629
AL035448.1	0.000106195	0.697574
AL160313.2	0.000106199	0.697572
ADH6	0.000106867	0.697379
CICP22	0.000107599	0.697169
AL390243.1	0.000109593	0.696602
DRP2	0.000109886	0.69652
AC093510.2	0.000111151	0.696166
MAPRE2	0.00011156	0.696052
SEMA3F-AS1	0.000111884	0.695962
RNA5SP82	0.000111946	0.695945
NRON	0.000112103	0.695901
AL591885.1	0.000112122	0.695896
RNF224	0.000112728	0.695729
RNA5SP132	0.000112892	0.695684
CDRT15P1	0.000113339	0.695561
AL583832.1	0.00011495	0.695123
RBP5	0.000115307	0.695027
HNRNPA1P36	0.000116162	0.694797
CTAGE7P	0.000116746	0.694641
RN7SL168P	0.000116879	0.694605
TMPRSS11CP	0.000117022	0.694567
AC010976.1	0.000117362	0.694477
AC011477.3	0.000117409	0.694464
AL031772.1	0.000119155	0.694004
AC004863.1	0.000120045	0.693771
AL021937.1	0.000121161	0.693482
MTX1P1	0.000122364	0.693173
SLC35G3	0.000122629	0.693105
LINC02068	0.000124007	0.692755
LCA5L	0.000126905	0.692029
CDHR2	0.000127116	0.691977
SLC34A3	0.000127418	0.691902
CALM2P2	0.000129553	0.691379
PDZD9	0.000130504	0.691148
AC090695.1	0.000130616	0.691121
ADM2	0.000130941	0.691042
TLL2	0.000131371	0.690939
THBS4	0.000131406	0.69093
AL121981.1	0.000133849	0.690348
AC109322.2	0.000134439	0.690208
AL136988.2	0.000135058	0.690063
DRAXIN	0.000135244	0.690019
AC003957.1	0.000135472	0.689966
CIAPIN1P	0.00013648	0.689731
BCORP1	0.000136965	0.689618
IRAK4	0.000137995	0.68938
AL109947.1	0.000138373	0.689293
FAM92A	0.000140401	0.68883
C17orf51	0.000140496	0.688808
LINC02381	0.00014104	0.688685
SRC	0.000141803	0.688513
CYSRT1	0.00014277	0.688296
AC000072.1	0.00014524	0.687748
FBXO48	0.000145527	0.687685
DCK	0.000146139	0.687551
RN7SL236P	0.000146362	0.687502
SPATA32	0.000146384	0.687497
AL078644.1	0.00014759	0.687234
AC027811.1	0.000148202	0.687102
DOCK9	0.000148517	0.687034
AL445193.2	0.000149357	0.686853
SLC26A5	0.000149718	0.686775
AC018752.1	0.000149802	0.686757
CSPG4P10	0.000151801	0.686331
CCNG1P1	0.000152751	0.68613
TRBV10-1	0.000153292	0.686017
MIR5685	0.000153716	0.685928
KRT222	0.00015397	0.685874
AC005154.1	0.000155162	0.685626
ZNF599	0.000155687	0.685517
IGSF3	0.000155838	0.685486
DCHS1	0.000156511	0.685347
AL021937.4	0.000157559	0.685131
MIR215	0.000157559	0.685131
AC025030.1	0.000157559	0.685131
AL139260.3	0.000157559	0.685131
AL161420.1	0.000157559	0.685131
BNIP3P38	0.000157559	0.685131
MIR4297	0.000157559	0.685131
MTND4LP7	0.000157559	0.685131
RN7SKP252	0.000157559	0.685131
RN7SKP267	0.000157559	0.685131
RNU6-19P	0.000157559	0.685131
RNU6-237P	0.000157559	0.685131
RNU6-402P	0.000157559	0.685131
RNU6-930P	0.000157559	0.685131
AL355922.3	0.00015792	0.685057
AP003072.4	0.00015792	0.685057
RF01293	0.000158308	0.684978
AL513327.1	0.00015903	0.684831
GPHA2	0.000159274	0.684781
PLCE1	0.00015929	0.684778
MTCO2P17	0.000159455	0.684744
AC007092.1	0.000161176	0.684397
AL109628.1	0.000161176	0.684397
CNTD1	0.0001632	0.683992
CADM4	0.000164655	0.683704
TRGV5P	0.000165124	0.683611
ZFR2	0.000167895	0.68307
AP004371.1	0.00016901	0.682854
FXYD6P1	0.00016901	0.682854
RNU6-714P	0.00016901	0.682854
TRBJ2-5	0.000169547	0.682751
MTND4P30	0.000169641	0.682733
ENOX2	0.000170138	0.682637
AC017028.1	0.000170279	0.68261
AC098935.2	0.000170492	0.68257
AP000648.3	0.000170526	0.682563
S100A11P1	0.00017352	0.681995
LEF1	0.000175077	0.681702
SNRPGP4	0.000177077	0.68133
AC016168.1	0.00017715	0.681317
AC005336.3	0.000177556	0.681242
AC009220.2	0.000178338	0.681097
AC026741.1	0.000185098	0.679874
AC011365.2	0.000185373	0.679825
AL773524.1	0.000185373	0.679825
MIR200B	0.000185373	0.679825
RN7SL440P	0.000185373	0.679825
YWHAZP7	0.000185373	0.679825
LINC02667	0.000185561	0.679791
IGHV7-81	0.000187179	0.679505
AC025165.1	0.000187558	0.679438
MFAP3	0.000187633	0.679425
AC008940.1	0.000189051	0.679176
AC026748.3	0.000190339	0.678952
FBXO25	0.000190571	0.678912
AC087623.1	0.00019061	0.678905
MUC6	0.000190752	0.67888
ACAD8	0.000193057	0.678483
RN7SKP112	0.000193297	0.678441
LETMD1	0.000193441	0.678417
AL121759.1	0.000194819	0.678181
CYCSP40	0.000195711	0.67803
AC093642.7	0.000196476	0.6779
PLXDC1	0.000196725	0.677858
AL356274.2	0.000197089	0.677797
AC084757.1	0.000197647	0.677703
AL109628.2	0.000201039	0.677137
UBTF	0.0002023	0.676928
AC009299.3	0.000203024	0.676809
LINC02222	0.000203193	0.676781
AL034428.1	0.000205177	0.676457
ZNF75D	0.000206387	0.676261
DUX4L50	0.0002068	0.676194
AC021087.2	0.000207465	0.676086
HNRNPA1P71	0.000207482	0.676084
AC022973.3	0.000207488	0.676083
AC026120.3	0.00020816	0.675975
AC012170.3	0.000208271	0.675957
AC022395.1	0.000209228	0.675803
AL162734.1	0.000209363	0.675782
AL161785.2	0.00020944	0.67577
AC097468.4	0.00020954	0.675754
TRBV11-1	0.00021147	0.675446
KCNA3	0.000211948	0.675371
RNA5SP260	0.000212854	0.675228
AC018445.1	0.000213281	0.67516
AL009177.1	0.000213891	0.675064
AC084337.1	0.000213911	0.675061
ITGA4	0.000215695	0.674783
PROX2	0.000217169	0.674554
AL645939.2	0.000217261	0.674539
ZNF658B	0.000218947	0.674279
AC005071.1	0.000219428	0.674205
KCNS1	0.000219689	0.674165
COL26A1	0.000220644	0.674019
AC008555.2	0.000220704	0.67401
BBIP1	0.000221331	0.673914
PKP4-AS1	0.00022161	0.673872
ZC3H13	0.000222012	0.673811
AC007876.1	0.000223093	0.673647
AL358472.3	0.000226797	0.673091
RASGRP1	0.00022727	0.67302
AL691432.1	0.000229685	0.672662
AC005486.1	0.00022973	0.672656
SLC9A3	0.000232035	0.672317
ACER2	0.000232234	0.672288
AC015853.2	0.000235511	0.671813
ASCL3	0.00023559	0.671801
TRBV6-7	0.000236465	0.671675
AC023024.2	0.000236686	0.671644
AC079140.3	0.000239649	0.67122
FGF11	0.000241048	0.671022
MLANA	0.000241481	0.670961
LINC02361	0.000241515	0.670956
AC009716.1	0.000242145	0.670867
AC148477.7	0.000244528	0.670533
AC092431.1	0.0002447	0.670509
CAB39P1	0.00024529	0.670427
OR52Q1P	0.00024529	0.670427
RNU2-60P	0.00024529	0.670427
RNU2-69P	0.00024529	0.670427
RNU6-83P	0.00024529	0.670427
DYNLL2	0.000246705	0.67023
ARL4C	0.00024694	0.670198
RPA1	0.000246968	0.670194
RNU6-181P	0.000247669	0.670097
MCC	0.000250541	0.669702
SNX1	0.000251085	0.669628
AC004837.2	0.00025213	0.669486
LLPHP2	0.000252224	0.669473
AL445490.1	0.000252561	0.669427
RIMKLBP2	0.000253568	0.669291
LEAP2	0.000253733	0.669269
ZNF630-AS1	0.000254391	0.66918
MIR548AG2	0.000255441	0.669038
KBTBD11	0.00025712	0.668813
GPR150	0.000257563	0.668754
AC008676.1	0.000259811	0.668455
LY6G5C	0.000259927	0.66844
ZNF853	0.000261927	0.668176
AC108475.1	0.000262324	0.668124
NCBP3	0.000263402	0.667983
TIA1	0.000266484	0.667582
AC074029.3	0.000266898	0.667528
AC004884.2	0.000269002	0.667257
TCF7L1	0.000269174	0.667235
AL513302.1	0.000269438	0.667201
CD40LG	0.000269461	0.667198
AL355864.1	0.000270069	0.66712
RUNX1	0.00027075	0.667033
AC127521.1	0.000276642	0.666287
HMGN1P5	0.00027927	0.665959
PPARA	0.000281263	0.665712
TMEM151B	0.000281382	0.665698
AC092053.3	0.000283237	0.665469
AC034102.9	0.000285923	0.665141
AC114801.2	0.000290301	0.664611
OR6C2	0.000290632	0.664571
ADAMTS7P3	0.000290857	0.664544
AC025175.2	0.000297157	0.663795
AC144652.1	0.000300526	0.663401
TLR9	0.000301037	0.663341
AL596223.2	0.000303889	0.66301
AZIN2	0.000306758	0.66268
LDHAP2	0.000306777	0.662678
AC005225.1	0.000313666	0.661897
NADK2-AS1	0.00031423	0.661833
AC012467.2	0.000316159	0.661618
GALM	0.000318354	0.661373
AC099568.2	0.000320545	0.661131
AL590240.2	0.000320998	0.661081
SNORD98	0.000320998	0.661081
AL590822.2	0.000321341	0.661043
AC024940.2	0.000322821	0.660881
SUPT20HL1	0.000326693	0.660459
PRRT2	0.000327607	0.66036
RF00093	0.000328185	0.660298
AC106886.1	0.000328611	0.660252
RNY1P15	0.000329001	0.66021
AC008781.2	0.000331498	0.659941
Z84478.1	0.000332201	0.659866
AC099811.6	0.000332634	0.65982
AC108676.1	0.000333679	0.659709
TRBV7-1	0.000335605	0.659504
AC123768.5	0.000336321	0.659428
AC005014.4	0.000337923	0.659259
AC025176.1	0.000338387	0.65921
AC010503.4	0.000343478	0.658678
AC008073.2	0.000343534	0.658673
AC010973.1	0.000343661	0.65866
AC068473.3	0.000343968	0.658628
AC055855.1	0.000344106	0.658613
CAMK1D	0.00034419	0.658605
AL078581.3	0.000344693	0.658553
AC114402.1	0.000346895	0.658325
RF00212	0.000350551	0.657951
IRGC	0.000350876	0.657918
SEPHS1	0.000351039	0.657901
AC244100.1	0.000357005	0.657298
PI16	0.000357859	0.657212
RGS20	0.000358026	0.657196
AP006296.1	0.000361053	0.656894
RDH12	0.000363195	0.656681
AC091607.2	0.000365452	0.656459
RPL7P17	0.000366034	0.656402
AC114490.3	0.000366192	0.656386
RAB32	0.000366457	0.65636
HNRNPA3P12	0.000367333	0.656274
TRBV5-5	0.000368409	0.656169
VEZF1	0.0003713	0.655888
AL162231.1	0.000372375	0.655783
AC018797.2	0.000375441	0.655488
LINC01147	0.000375632	0.65547
AL157938.3	0.000375833	0.65545
AC096708.2	0.000377122	0.655327
MR1	0.000377363	0.655304
LINC02042	0.000377719	0.65527
AC005052.2	0.0003779	0.655252
CDC37P2	0.00037827	0.655217
AL390728.6	0.000379283	0.65512
AC084724.1	0.000379476	0.655102
AC132192.1	0.000383822	0.65469
RB1	0.000385308	0.654551
RNU6-1318P	0.00038586	0.654499
RNU6-875P	0.00038586	0.654499
AC012254.3	0.000388964	0.654209
GRIK1	0.000390837	0.654035
NEO1	0.000395238	0.653628
HTR5BP	0.000396434	0.653519
FNDC11	0.000400163	0.653178
AC009220.3	0.000400282	0.653168
KCNK16	0.000400353	0.653161
AC107031.1	0.000412314	0.652089
RNU6-950P	0.000412534	0.652069
AL451063.1	0.000414409	0.651903
AC139795.2	0.000414537	0.651892
AC113615.2	0.000416242	0.651742
BEND3P1	0.000417597	0.651623
COX6A2	0.000417747	0.65161
RPL30P2	0.000417938	0.651594
AC114730.2	0.00041865	0.651531
LINC01402	0.000422647	0.651183
FAM238B	0.000423006	0.651152
AC117503.4	0.000424059	0.651061
GTF2H4	0.000424967	0.650983
AL161636.1	0.000426601	0.650842
RPL22P24	0.000426601	0.650842
OR11H7	0.000426923	0.650815
AF129075.3	0.000427635	0.650753
KRR1P1	0.000428355	0.650692
AL354855.1	0.00042984	0.650565
AC233702.7	0.00043322	0.650277
SPTAN1	0.000433357	0.650265
RBM12	0.00043492	0.650133
KRT73-AS1	0.00043502	0.650125
AC109460.1	0.000435683	0.650069
AFF2	0.0004391	0.649781
CYP21A2	0.000439624	0.649737
AP004372.1	0.000439832	0.64972
AC137932.3	0.000441922	0.649545
AC004148.2	0.000442376	0.649508
FLG2	0.000447066	0.649119
PHF7	0.000447682	0.649068
AL034550.2	0.000449164	0.648946
AP001893.3	0.000450798	0.648812
AC007314.1	0.000451193	0.64878
AC010731.2	0.00045308	0.648625
DEFB131B	0.000457834	0.648239
AC244250.4	0.000458859	0.648156
AC093724.1	0.00045994	0.648069
AC008663.3	0.000461591	0.647937
NIP7P3	0.000462023	0.647902
SLC13A3	0.000462983	0.647825
MTCO3P43	0.000463142	0.647812
AL136115.1	0.00046617	0.647571
AC025280.3	0.000466685	0.64753
AL354919.1	0.000469788	0.647284
CYP4F35P	0.000471907	0.647117
DEFB109A	0.000472449	0.647074
AL358334.1	0.000473483	0.646993
CYP3A5	0.000482482	0.646292
MYO1H	0.000485505	0.646059
TMX2P1	0.000485976	0.646023
AC008620.2	0.000486863	0.645955
CTDSP2	0.000489936	0.64572
C4orf50	0.000491629	0.645591
AC005261.3	0.000492107	0.645555
CTBP1-AS	0.000494889	0.645344
ZNF451-AS1	0.000495729	0.645281
KCNMB2	0.000497373	0.645157
CERKL	0.000501363	0.644858
AL133373.1	0.000502519	0.644772
LINC01293	0.00050494	0.644591
PCDHGA1	0.0005065	0.644476
AC135279.1	0.000509639	0.644244
PABPC4-AS1	0.000510156	0.644206
IL17RA	0.000516776	0.643721
FAM32BP	0.00052097	0.643417
AC005379.1	0.000521646	0.643369
RNU4-52P	0.000524079	0.643193
AL449214.1	0.000525772	0.643072
AC007952.5	0.000529331	0.642817
AC137932.1	0.00052956	0.642801
EDEM3	0.000532759	0.642574
PCSK5	0.000535271	0.642396
STAT5B	0.000536294	0.642324
LRRC7	0.000538778	0.642149
UBE2Q1-AS1	0.000540774	0.642009
AC079880.2	0.000541017	0.641992
BNIP3P26	0.000541273	0.641975
PRPF38B	0.00054505	0.641711
AC080129.1	0.000545271	0.641696
NEFM	0.000545849	0.641656
AP4B1-AS1	0.000547817	0.64152
PEX5L-AS2	0.00054871	0.641458
ACADSB	0.000551062	0.641296
AL731702.1	0.000553862	0.641103
LBR	0.000557164	0.640878
SUCNR1	0.000557445	0.640859
AP003072.5	0.0005577	0.640841
GCNT7	0.000561787	0.640564
NDUFB10P1	0.000562369	0.640524
RNF212B	0.000562812	0.640494
FRG1KP	0.000569139	0.640069
AC093157.1	0.000571784	0.639892
RNU6-952P	0.000577825	0.639491
AC018797.3	0.000579346	0.639391
PDE7A	0.000582852	0.639161
NFE2L3	0.000587642	0.638848
MIR5692A1	0.00059279	0.638514
CCDC188	0.000594893	0.638378
PLCG1-AS1	0.000595926	0.638312
TSSK4	0.000596369	0.638283
GFRA1	0.000597092	0.638237
AC020765.4	0.000599056	0.638111
AL080313.1	0.00059947	0.638085
AL137186.1	0.000600241	0.638035
RNU6ATAC16P	0.000603748	0.637812
AC079781.1	0.000604688	0.637752
CELSR2	0.000607199	0.637593
TMPRSS11D	0.000607401	0.63758
AC005899.2	0.000609162	0.637469
AL160175.1	0.000609162	0.637469
AP000870.1	0.000609162	0.637469
CST9LP2	0.000609162	0.637469
DOCK9-AS1	0.000609162	0.637469
RPS15AP27	0.000609162	0.637469
MTATP6P17	0.000610771	0.637367
AL590438.1	0.000612511	0.637258
LINC00102	0.0006197	0.636809
AL133268.4	0.000622101	0.63666
RN7SL646P	0.000622504	0.636635
AL731566.1	0.000622935	0.636608
TRBV26	0.000629957	0.636176
AP1AR	0.000642208	0.635431
ADORA2A-AS1	0.000642893	0.63539
AC245100.4	0.000644353	0.635302
IGHV4-80	0.000644945	0.635267
TIMP2	0.000646572	0.635169
AC096638.2	0.000648927	0.635028
AC136424.1	0.000648927	0.635028
AC025283.1	0.000649277	0.635007
AL160290.1	0.000652127	0.634837
AC024145.1	0.000654227	0.634713
ASAP3	0.000654507	0.634696
AC113607.1	0.000654557	0.634693
AC009133.3	0.000655689	0.634626
AC010976.2	0.000662002	0.634254
NUP50	0.000663012	0.634195
TNFAIP8	0.00066475	0.634093
LIX1L-AS1	0.00066768	0.633922
AC018521.6	0.000669917	0.633792
UGT2B28	0.000672484	0.633643
NHLRC3	0.000672849	0.633622
AL355075.5	0.000674399	0.633532
AL008730.1	0.000679373	0.633246
TRIM34	0.000679998	0.63321
AC009486.1	0.000680529	0.633179
GRPEL2-AS1	0.00068392	0.632985
PAFAH1B1	0.000689127	0.632689
BBS4	0.000689418	0.632673
AL031670.1	0.000693775	0.632426
AC144548.1	0.000694089	0.632409
AC016683.1	0.000697032	0.632243
EBF3	0.000698383	0.632167
AP000942.3	0.000700587	0.632044
AP001357.1	0.000701163	0.632012
C9orf152	0.00070206	0.631962
AC011997.2	0.000719221	0.631014
AL136439.1	0.000723462	0.630783
RNU6-88P	0.000725508	0.630672
AANAT	0.000725991	0.630646
AC105265.3	0.000726226	0.630633
KCNJ1	0.000726396	0.630624
AC100854.1	0.000728698	0.630499
AGAP7P	0.000729527	0.630455
IDI2-AS1	0.000731866	0.630328
TRBJ2-2P	0.000733328	0.63025
RNU6-418P	0.00073558	0.630129
AC084824.3	0.000737478	0.630027
AC015849.3	0.000738103	0.629994
TRBV6-8	0.000742661	0.629751
RNU6-1011P	0.000743657	0.629698
AC091564.5	0.000744195	0.62967
AL023882.1	0.00074736	0.629502
HNRNPA1P62	0.00074803	0.629467
AC015853.3	0.000757005	0.628995
PXDN	0.000759282	0.628876
AL354733.2	0.000762904	0.628688
TSPYL4	0.000764301	0.628615
RHPN1-AS1	0.000767143	0.628468
PRPF38A	0.000768381	0.628404
PLXNB1	0.00077391	0.62812
PIGCP1	0.000774842	0.628072
PPP2R3A	0.000779566	0.627831
RCSD1	0.000782495	0.627682
DGCR9	0.000786363	0.627486
CHRNG	0.000787569	0.627425
CEND1	0.000787933	0.627406
AC008264.2	0.000789623	0.627321
RPL22P12	0.000790016	0.627301
SERPINH1P1	0.000793946	0.627104
ATF1	0.000799029	0.626849
RNA5SP156	0.000800611	0.626771
SP1	0.000802588	0.626672
ZNF546	0.000813872	0.626115
CNGB3	0.000817899	0.625918
CA10	0.000819251	0.625851
FANCD2OS	0.000825973	0.625525
RPL23AP64	0.000828473	0.625403
AL158834.2	0.000830207	0.62532
WIPF1	0.000830876	0.625287
RPL26P27	0.000833985	0.625138
AC107896.1	0.000838769	0.624908
SPATA31E1	0.000839227	0.624886
AKR1C4	0.000839643	0.624866
RNA5SP78	0.000839644	0.624866
AL139132.1	0.000842219	0.624744
BNIP3P24	0.000843017	0.624706
AP003469.4	0.00084486	0.624618
AC107015.1	0.000860679	0.623872
ITGAL	0.000869038	0.623482
AL035658.1	0.000875509	0.623183
STARD4-AS1	0.000875712	0.623174
AC106779.1	0.000876019	0.62316
AL161757.2	0.000876164	0.623153
ZNF260	0.000877131	0.623108
AL157932.1	0.000877674	0.623083
AC002519.1	0.000878013	0.623068
AC024267.5	0.00088076	0.622942
AC124312.4	0.000883762	0.622804
AC100778.4	0.000883762	0.622804
OR5S1P	0.000883762	0.622804
RNA5SP219	0.000883762	0.622804
RN7SKP282	0.000887744	0.622622
AC079907.1	0.000890064	0.622517
AC011247.1	0.000891892	0.622434
PSPC1-AS2	0.000893192	0.622375
AC013248.1	0.000895609	0.622266
C3orf56	0.000897793	0.622167
AL359555.1	0.000897996	0.622158
AL603832.1	0.000899547	0.622088
ANKRD34A	0.000911949	0.621533
AL022238.1	0.000920684	0.621146
AC027018.1	0.000921915	0.621091
AC233300.1	0.000922442	0.621068
AF099810.1	0.000922742	0.621055
AC011611.5	0.000923785	0.621009
USP49	0.00092625	0.620901
AD000671.3	0.000929121	0.620775
PEX5	0.0009292	0.620771
AC019097.1	0.000930126	0.620731
ZNF350-AS1	0.000936793	0.62044
RPL35AP18	0.000939187	0.620336
KRT8P19	0.000939208	0.620335
TSPAN8	0.000941743	0.620225
OR10V2P	0.000944717	0.620097
CICP3	0.000945986	0.620042
RUNX1T1	0.000948109	0.61995
AC087620.1	0.000948299	0.619942
AC016866.2	0.000957393	0.619552
AC010538.1	0.000957927	0.61953
AC109454.4	0.000958828	0.619491
ORAI2	0.000962935	0.619317
CLMAT3	0.000967585	0.619119
CNGB1	0.000973828	0.618856
AC004847.1	0.000977587	0.618698
SLC35B3	0.000984457	0.618411
C1orf100	0.000986523	0.618325
ATP8A2	0.000986985	0.618306
AC008555.6	0.000987823	0.618271
Z80897.1	0.000988996	0.618223
FRMPD4-AS1	0.000991107	0.618135
TENM1	0.000994245	0.618005
AC095052.1	0.000996233	0.617923
TP53RK	0.000998105	0.617846
AP003065.2	0.00100035	0.617754
AL355388.1	0.00101732	0.617062
BNC1	0.0010222	0.616864
PDLIM1P1	0.0010238	0.6168
MIR548O	0.00102738	0.616656
TTLL2	0.00103355	0.616409
CD2	0.00103387	0.616396
MIR6855	0.00104282	0.61604
PBLD	0.0010459	0.615918
AC016722.2	0.00104821	0.615827
AL157823.2	0.00105232	0.615665
TLE6	0.00105676	0.61549
PCDHB15	0.00105698	0.615482
MIR646	0.00105852	0.615421
ST8SIA1	0.00106027	0.615353
AC015923.1	0.00106412	0.615203
AC073115.1	0.00106629	0.615118
AC010323.1	0.00106684	0.615097
FTH1P24	0.00106705	0.615089
MIR4697HG	0.00106741	0.615075
AL138889.3	0.00106843	0.615035
KCNH7	0.0010751	0.614777
GAPDHP36	0.00107773	0.614675
MZT1P2	0.00107794	0.614667
PAK2	0.00107841	0.614649
LINC00629	0.0010827	0.614484
AC092162.3	0.00108325	0.614463
MTCO1P17	0.00108837	0.614267
RNU6-315P	0.00109233	0.614116
SUPT20H	0.00109842	0.613885
MCPH1-AS1	0.00110284	0.613717
AC106782.5	0.00110466	0.613649
AC087645.4	0.00111071	0.613421
AC012313.3	0.0011149	0.613264
RNU1-22P	0.00111757	0.613164
AC008871.1	0.00111954	0.613091
AC239809.1	0.00111954	0.613091
AL592528.1	0.00112051	0.613054
RCAN1	0.00112471	0.612898
DUX4L37	0.00113102	0.612664
LINC01046	0.00113592	0.612484
AL450267.1	0.00114535	0.612138
AC093864.1	0.0011499	0.611971
AC090186.1	0.00115083	0.611938
POLH	0.00115133	0.611919
AL158214.2	0.00115408	0.611819
TXNDC12-AS1	0.00115766	0.61169
RPS20P15	0.00115808	0.611674
SCAI	0.00116054	0.611585
AC087645.2	0.00116646	0.611372
TMX3	0.0011702	0.611237
AC087301.1	0.00117862	0.610936
PANX3	0.00118352	0.610762
AL109936.6	0.00118622	0.610666
PPT2	0.00119377	0.610399
RN7SL806P	0.00120542	0.609989
AL731567.1	0.00120649	0.609952
RAB27A	0.00120685	0.609939
WDR82	0.00121842	0.609536
RPL10P19	0.00122192	0.609415
AC122719.1	0.0012311	0.609099
CD47	0.00124145	0.608744
AP001767.3	0.0012436	0.608671
TET2-AS1	0.00124599	0.60859
ATG12P2	0.00124616	0.608584
RAB44	0.00124657	0.60857
HLA-W	0.00124916	0.608482
AC091053.2	0.00125775	0.608191
LRRC37A6P	0.00125888	0.608153
KCNAB1	0.00127281	0.607686
OR2H2	0.00127411	0.607643
PIGX	0.0012778	0.60752
AL359532.1	0.00127896	0.607481
LINC00346	0.00128844	0.607167
TMPRSS6	0.00129054	0.607097
AC008555.1	0.00129212	0.607045
MTCO2P27	0.00129573	0.606926
CELF2-AS1	0.00129802	0.606851
ZNF449	0.001299	0.606819
AGBL5	0.00129929	0.606809
AVPR1B	0.00130178	0.606728
AC018735.1	0.00130216	0.606715
NBR1	0.00130283	0.606694
CCND3	0.00130286	0.606692
CTC1	0.00130443	0.606641
GAU1	0.00131711	0.606228
FAM217B	0.00132088	0.606106
AL139022.1	0.00132272	0.606047
C2orf68	0.00132447	0.60599
LIX1L	0.00132867	0.605855
AC007919.1	0.0013301	0.605809
CSNK1A1P3	0.0013317	0.605757
ZNF396	0.00133245	0.605733
AC027559.1	0.00133877	0.605531
C6orf89	0.00133932	0.605513
AC020915.3	0.0013413	0.60545
RN7SL862P	0.00134195	0.605429
TACR2	0.0013469	0.605272
MRPL50P2	0.00135771	0.604929
BICDL1	0.00136331	0.604752
GTF2A1	0.00136477	0.604706
AC113208.2	0.00136808	0.604602
AC022973.1	0.00137249	0.604464
AC007036.1	0.00137414	0.604412
SLC10A1	0.00137755	0.604306
KIF5A	0.001387	0.604012
TRMT10B	0.00138864	0.603961
RN7SKP74	0.00139005	0.603918
RNF222	0.00139144	0.603875
MCF2L-AS1	0.00139262	0.603838
AC073585.2	0.00139432	0.603786
AL136967.1	0.00139432	0.603786
MOSPD2	0.00140208	0.603546
H3F3AP2	0.00141642	0.603108
RGR	0.00141783	0.603065
MIR5695	0.00142965	0.602707
SIM2	0.00143776	0.602462
AL512656.1	0.00144543	0.602232
LIPC	0.00144894	0.602127
AC062037.1	0.00146083	0.601773
MAGOH3P	0.0014644	0.601667
SMIM18	0.00146812	0.601557
GGT7	0.001471	0.601472
NFYA	0.00147186	0.601447
IGLV1-62	0.00148181	0.601155
SUMO2P15	0.00148595	0.601033
SNRPCP9	0.00148761	0.600985
AC019072.1	0.00149031	0.600906
NDUFB5P2	0.00149055	0.600899
RNU7-3P	0.00149406	0.600797
DDX46	0.0014943	0.60079
AL121750.1	0.00150944	0.600351
AC079594.1	0.00150945	0.600351
TMEM184A	0.00151146	0.600293
AC026348.1	0.00151559	0.600174
ITGA6	0.00151792	0.600107
MFSD8	0.00151794	0.600107
AL390208.1	0.00152056	0.600031
CENPS-CORT	0.00152986	0.599766
AC100788.1	0.00153007	0.599759
SYNE3	0.00153371	0.599656
SLAMF6	0.00153456	0.599632
AC012513.3	0.00154189	0.599424
TRBJ2-3	0.00154413	0.59936
AC007952.2	0.00154462	0.599347
DIAPH2-AS1	0.00154799	0.599251
AC012157.1	0.00155039	0.599184
AL133492.1	0.00155322	0.599104
RBL2	0.00155909	0.598939
PLA2G10	0.00156017	0.598909
IARS2	0.00158196	0.598301
LHX4	0.00158346	0.59826
LYPLAL1-AS1	0.00158576	0.598196
ACAP2-IT1	0.00158679	0.598168
HLA-DQB1-AS1	0.00159195	0.598025
PAICSP1	0.00159222	0.598018
AL513548.2	0.00159605	0.597912
AC097382.2	0.00160178	0.597755
RTL6	0.00160778	0.597591
AL138789.1	0.0016152	0.597389
TESPA1	0.00162066	0.59724
AL358472.4	0.00162082	0.597236
FANCC	0.001621	0.597231
LINC01963	0.00162154	0.597217
AL031602.2	0.00163279	0.596912
IRS1	0.00163508	0.59685
ADA2	0.00163933	0.596736
AC018695.2	0.00164787	0.596507
AIRN	0.0016485	0.59649
AC093675.2	0.00165794	0.596238
AC004067.1	0.00165896	0.596211
AC009084.2	0.00166651	0.596011
OSBPL11	0.00168301	0.595576
AC009052.1	0.00168464	0.595533
KRT18P34	0.0016972	0.595204
LINC02212	0.00170809	0.594921
AC109460.2	0.00170815	0.594919
CYP3A52P	0.00173334	0.59427
PDZK1P1	0.0017359	0.594205
ST8SIA4	0.00173692	0.594178
RBMS1P1	0.00173768	0.594159
AC003681.1	0.00173859	0.594136
AL139353.2	0.00176125	0.59356
AP001005.3	0.00176391	0.593493
CEP104	0.00176465	0.593474
AC027644.2	0.00176499	0.593466
ENPP7P11	0.00176695	0.593416
AL353588.1	0.00176906	0.593363
AC068481.1	0.00177419	0.593234
AL162457.1	0.00177983	0.593092
AC008937.3	0.00178197	0.593039
AC112482.1	0.00179526	0.592708
AL162253.1	0.00180027	0.592583
ELOVL4	0.00180064	0.592574
GNAL	0.00180967	0.592351
VSNL1	0.00182495	0.591975
CYP46A1	0.00182575	0.591955
GOLGA6L17P	0.00182958	0.591861
AC073413.1	0.00183812	0.591653
RNU6-288P	0.00183812	0.591653
AC093227.3	0.00183812	0.591653
RNF170	0.00184758	0.591423
AC080013.4	0.00184824	0.591407
AC011290.2	0.00184933	0.59138
KCNC1	0.00185548	0.591232
ATP1B3-AS1	0.00186231	0.591067
TCHH	0.00187128	0.590851
PAX8-AS1	0.00188014	0.590639
AC025287.3	0.00188037	0.590634
AC021106.3	0.00188123	0.590613
AC025188.1	0.00189014	0.590401
AC079325.1	0.00190082	0.590147
AC007485.2	0.00190139	0.590134
COL6A4P2	0.00190766	0.589986
AL118511.3	0.00191439	0.589827
AL157893.2	0.00191557	0.589799
AC079921.1	0.00192287	0.589628
GTSE1	0.00193109	0.589435
ZNF114-AS1	0.00193129	0.589431
RRH	0.00193201	0.589414
AC006116.10	0.00193621	0.589316
ADNP-AS1	0.00194269	0.589165
AC138956.2	0.00194401	0.589135
RPL23AP14	0.00194597	0.589089
RPL7P57	0.00195922	0.588783
AC018878.1	0.00196646	0.588616
FYB1	0.00196683	0.588607
AP005212.4	0.00196713	0.5886
ZSCAN10	0.00197397	0.588444
AC100832.2	0.00197573	0.588403
AL157712.1	0.00198956	0.588087
KCNT1	0.00200384	0.587763
SKAP1-AS1	0.00200514	0.587734
AC090498.1	0.00200807	0.587668
AC107081.4	0.0020131	0.587554
AC011451.1	0.00201553	0.587499
DNAJB7	0.00202271	0.587338
IGHV3-79	0.00202322	0.587326
AC006042.2	0.00202556	0.587274
AL391650.1	0.00202685	0.587245
MIR6813	0.00202942	0.587188
IGFL4	0.00203421	0.58708
UBE2G2	0.00203842	0.586987
SRPK3	0.00203857	0.586983
ALDOB	0.00203867	0.586981
CEACAM5	0.00203988	0.586954
AC007406.5	0.00205504	0.586617
AP003352.1	0.002069	0.586309
ZFPM2	0.00207365	0.586207
AC022382.2	0.00208472	0.585964
AC092745.4	0.00209149	0.585816
MIS18A-AS1	0.00209201	0.585805
RTP3	0.00209427	0.585756
CBX1P2	0.00210015	0.585628
AC110285.6	0.00210137	0.585601
AC104938.1	0.0021089	0.585438
AC133552.4	0.00211009	0.585412
SPA17	0.00211085	0.585396
AL161652.1	0.00211557	0.585293
INAVA	0.00211663	0.585271
AC095033.1	0.00212752	0.585036
CNOT11	0.00214269	0.584711
DDX12P	0.00214359	0.584691
RNU6-516P	0.00214881	0.58458
RNA5SP532	0.00215161	0.584521
MFSD9	0.00216441	0.584249
AC084018.2	0.00216877	0.584156
AL358333.2	0.00217296	0.584068
RN7SKP23	0.00217746	0.583973
SEPT1	0.00218678	0.583777
CICP16	0.00218713	0.58377
AL021918.4	0.00218744	0.583763
COL9A3	0.00219003	0.583709
ABCG4	0.00219582	0.583587
AP002884.2	0.00219848	0.583532
TRBV5-7	0.00220228	0.583452
IGIP	0.00220246	0.583449
AC103778.1	0.00222747	0.582929
BRSK2	0.0022368	0.582737
PRPS1P2	0.0022428	0.582613
NR2C2	0.0022529	0.582406
CDC23	0.00225723	0.582317
MCCC1-AS1	0.00225778	0.582306
AC005180.2	0.00226772	0.582104
TXNDC8	0.0022687	0.582084
AC098851.1	0.00227153	0.582026
EPHX1	0.00227695	0.581916
AC104066.2	0.00229276	0.581596
GLI1	0.00229614	0.581528
MAP3K14-AS1	0.0023084	0.581282
MTCO3P17	0.00231995	0.581051
PGLYRP3	0.00232472	0.580955
POU5F1	0.00233724	0.580706
CGGBP1	0.00234013	0.580649
AL591623.2	0.00234065	0.580639
AC073857.1	0.00234324	0.580588
IL10RB-DT	0.00234357	0.580581
AC136297.1	0.00234912	0.580471
AC016999.1	0.00235038	0.580446
AL353763.1	0.00235051	0.580444
[truncated: 51,994 more rows]
