# Supplementary material for: Specific lncRNA signatures discriminate childhood acute leukaemias: a pilot study
Source: Cancer Cell Int. 2022 Nov 30;22:373. doi: 10.1186/s12935-022-02789-3 (PMC9710039; doi:10.1186/s12935-022-02789-3)
Supplement: Supplementary file 9 — Additional file 9: Dataset S9. Counts of RNA-seq sequencing samples of B-ALL patients. [file 12935_2022_2789_MOESM9_ESM.xlsx]

## Sheet: B_raw_counts
ensembl_gene_id	external_gene_name	B_NAIVE_CB20	B_NAIVE_CB15	B_NAIVE_CB19	B_NAIVE_CB18	B_NAIVE_CB17	B_NAIVE_CB14	B_NAIVE_CB8	B_NAIVE_CB9	B_NAIVE_CB7	B_ALL_GRPM33	B_ALL_PA62	B_ALL_GRPM24	B_ALL_GRPM18	B_ALL_PA69	B_ALL_PA51	B_ALL_GRPM25	B_ALL_GRPM27	B_ALL_PA57
ENSG00000000003	TSPAN6	0	0	0	0	0	0	1	0	0	0	0	4	0	0	0	0	0	1
ENSG00000000005	TNMD	0	0	0	0	0	0	0	0	0	0	0	0	0	0	0	0	0	0
ENSG00000000419	DPM1	10	8	22	19	15	12	11	15	11	44	26	4	22	15	132	22	32	9
ENSG00000000457	SCYL3	22	53	45	40	112	63	9	40	10	32	9	22	15	36	5	27	23	17
ENSG00000000460	C1orf112	4	6	6	8	8	9	2	10	6	28	4	14	9	7	14	9	15	4
ENSG00000000938	FGR	171	230	262	227	697	362	131	293	262	65	34	8	24	354	6	148	36	5
ENSG00000000971	CFH	0	0	0	0	0	0	0	0	0	0	0	2	0	14	0	41	0	0
ENSG00000001036	FUCA2	5	5	1	1	17	3	1	0	9	7	1	5	0	16	0	16	11	0
ENSG00000001084	GCLC	6	18	18	7	32	22	7	12	17	48	10	45	6	33	13	56	41	3
ENSG00000001167	NFYA	7	11	11	17	29	24	13	10	12	34	35	37	30	18	32	23	30	7
ENSG00000001460	STPG1	2	0	3	6	7	3	4	1	0	4	7	7	7	6	1	2	0	1
ENSG00000001461	NIPAL3	66	114	100	45	117	104	32	80	101	54	30	71	63	78	11	59	40	9
ENSG00000001497	LAS1L	27	19	33	40	81	36	5	42	48	92	123	74	33	30	48	40	54	41
ENSG00000001561	ENPP4	6	7	11	7	19	3	5	9	10	19	2	3	2	2	0	5	0	1
ENSG00000001617	SEMA3F	0	0	0	0	1	0	0	0	0	32	5	14	22	0	18	0	2	15
ENSG00000001626	CFTR	0	0	0	0	0	0	0	0	0	0	0	0	0	0	0	0	0	0
ENSG00000001629	ANKIB1	206	153	113	57	221	213	74	160	170	27	87	111	146	79	33	63	143	59
ENSG00000001630	CYP51A1	0	0	3	1	0	0	0	12	0	0	1	4	1	0	0	2	2	0
ENSG00000001631	KRIT1	116	135	142	96	230	134	49	168	66	156	76	129	133	114	51	128	135	50
ENSG00000002016	RAD52	19	36	26	28	29	38	14	25	18	21	16	35	26	15	14	27	20	21
ENSG00000002330	BAD	31	43	28	19	77	35	27	39	32	25	24	26	19	24	10	34	55	11
ENSG00000002549	LAP3	36	38	19	13	78	38	21	28	48	23	57	69	76	228	129	42	97	17
ENSG00000002586	CD99	46	20	36	58	80	17	25	64	54	1002	823	346	256	1123	13	1135	1249	291
ENSG00000002587	HS3ST1	16	67	46	34	101	57	11	42	63	34	1	1	0	2	0	2	1	0
ENSG00000002726	AOC1	0	0	0	0	0	0	0	0	0	0	0	0	0	0	0	0	0	0
ENSG00000002745	WNT16	1	0	3	0	5	0	0	1	1	0	0	0	0	0	0	0	0	0
ENSG00000002746	HECW1	0	0	0	0	0	0	0	0	0	0	0	0	1	0	0	0	0	0
ENSG00000002822	MAD1L1	34	69	38	34	96	73	74	47	46	80	23	58	12	53	13	91	75	12
ENSG00000002834	LASP1	70	87	232	231	444	214	28	217	208	522	261	238	246	338	177	233	280	111
ENSG00000002919	SNX11	37	49	65	24	98	41	55	74	96	14	27	19	23	36	18	31	42	7
ENSG00000002933	TMEM176A	1	0	1	1	13	1	0	23	49	10	1	2	0	8	0	7	1	0
ENSG00000003056	M6PR	33	40	92	76	181	69	6	87	61	276	58	149	50	179	51	201	93	48
ENSG00000003096	KLHL13	0	0	0	0	0	2	0	2	0	0	0	1	0	0	2	1	0	0
ENSG00000003137	CYP26B1	0	0	0	0	0	0	0	0	0	0	0	0	0	0	0	0	0	0
ENSG00000003147	ICA1	1	1	6	2	6	0	1	0	3	2	2	5	0	34	4	69	1	3
ENSG00000003249	DBNDD1	21	182	40	19	37	17	13	35	41	1	16	14	40	3	0	1	2	0
ENSG00000003393	ALS2	8	15	3	9	15	11	6	4	7	14	4	8	11	8	1	12	8	2
ENSG00000003400	CASP10	85	77	91	107	168	80	39	79	61	73	55	27	45	168	74	211	45	25
ENSG00000003402	CFLAR	437	474	628	390	657	449	656	375	554	303	493	261	414	499	122	508	401	103
ENSG00000003436	TFPI	6	2	4	2	2	0	0	1	0	66	3	5	1747	16	70	41	1	0
ENSG00000003509	NDUFAF7	7	12	10	25	50	26	5	20	27	53	16	16	19	14	48	14	15	15
ENSG00000003756	RBM5	353	133	250	294	341	304	73	221	245	410	456	138	316	105	363	159	134	139
ENSG00000003987	MTMR7	0	1	0	0	0	0	0	0	0	0	0	0	0	0	0	0	0	0
ENSG00000003989	SLC7A2	0	0	0	0	0	0	0	0	0	0	0	0	0	0	0	0	1	0
ENSG00000004059	ARF5	1	0	2	1	3	2	1	2	0	1	4	2	4	0	2	0	5	0
ENSG00000004139	SARM1	28	20	26	27	34	29	15	20	29	8	0	13	13	11	8	9	17	7
ENSG00000004142	POLDIP2	24	45	39	42	122	55	10	65	49	63	52	55	42	58	17	45	93	34
ENSG00000004399	PLXND1	11	2	3	0	10	0	3	12	14	132	81	107	30	180	30	232	268	65
ENSG00000004455	AK2	60	128	104	100	217	116	43	126	118	234	121	144	100	221	37	221	299	41
ENSG00000004468	CD38	173	186	159	240	368	365	38	281	127	202	479	215	95	286	78	270	330	48
ENSG00000004478	FKBP4	48	135	84	80	175	75	100	116	101	67	3	95	11	65	3	148	51	31
ENSG00000004487	KDM1A	28	7	20	15	16	23	8	15	24	32	62	38	131	8	156	25	46	32
ENSG00000004534	RBM6	470	282	446	287	529	431	169	343	329	180	225	135	368	103	178	171	145	171
ENSG00000004660	CAMKK1	13	6	7	11	9	5	11	5	4	4	3	1	31	10	30	11	32	10
ENSG00000004700	RECQL	94	94	67	40	177	137	66	85	63	42	83	49	42	83	34	76	162	25
ENSG00000004766	VPS50	18	25	28	34	46	29	13	26	10	39	8	17	8	14	4	24	29	3
ENSG00000004776	HSPB6	0	0	0	0	0	0	0	0	0	1	0	0	1	0	0	1	3	0
ENSG00000004777	ARHGAP33	19	19	32	20	54	45	16	30	9	345	92	142	200	173	26	123	135	32
ENSG00000004779	NDUFAB1	23	56	57	52	158	76	12	77	93	237	113	144	68	163	48	162	275	48
ENSG00000004799	PDK4	1	1	0	0	2	1	0	2	19	5	1	5	0	24	10	2	76	0
ENSG00000004809	SLC22A16	0	0	0	0	0	0	0	0	0	28	9	18	15	4	1	14	0	2
ENSG00000004838	ZMYND10	3	13	6	4	29	5	1	9	12	2	3	3	0	4	1	5	3	0
ENSG00000004846	ABCB5	0	0	0	0	0	1	0	0	0	0	0	0	0	0	0	0	0	0
ENSG00000004848	ARX	0	1	0	0	0	0	0	0	0	0	0	0	0	0	0	0	0	0
ENSG00000004864	SLC25A13	38	27	35	26	56	29	22	32	23	9	27	21	22	31	16	53	77	15
ENSG00000004866	ST7	3	0	0	2	0	2	1	3	0	13	7	10	1	14	0	7	17	0
ENSG00000004897	CDC27	238	127	116	159	248	254	115	133	139	111	257	192	135	96	181	168	181	91
ENSG00000004939	SLC4A1	46	5	134	32	53	8	2	9	16	674	138	192	109	19	78	415	8	3
ENSG00000004948	CALCR	0	1	0	0	0	0	0	0	0	0	0	0	0	0	1	0	0	0
ENSG00000004961	HCCS	16	16	20	16	39	17	6	23	23	53	88	51	11	20	24	16	42	37
ENSG00000004975	DVL2	30	67	55	57	97	62	21	54	56	240	32	64	56	62	11	69	95	30
ENSG00000005001	PRSS22	0	0	0	0	0	0	0	0	0	1	0	0	0	0	0	0	0	0
ENSG00000005007	UPF1	137	192	175	125	321	191	124	175	253	180	172	98	94	113	245	98	195	57
ENSG00000005020	SKAP2	165	280	292	198	476	325	88	307	226	99	43	101	2	12	2	92	118	37
ENSG00000005022	SLC25A5	111	49	145	246	259	139	5	172	116	327	721	292	146	130	295	172	233	140
ENSG00000005059	CCDC109B	209	263	209	207	375	252	132	297	296	102	147	176	162	157	35	64	314	72
ENSG00000005073	HOXA11	1	0	0	0	0	0	0	0	0	0	0	0	0	0	0	0	0	0
ENSG00000005075	POLR2J	131	287	193	123	394	136	58	240	296	140	223	230	42	205	103	207	356	47
ENSG00000005100	DHX33	47	39	61	29	65	59	31	37	37	31	43	79	51	29	20	36	76	36
ENSG00000005102	MEOX1	0	0	0	0	1	1	0	0	0	1	0	0	0	0	0	0	0	0
ENSG00000005108	THSD7A	0	0	1	0	0	0	0	0	0	46	15	74	0	1	0	1	77	4
ENSG00000005156	LIG3	71	71	70	52	116	93	52	65	32	76	112	137	132	102	19	78	141	109
ENSG00000005175	RPAP3	98	114	78	73	160	142	55	150	122	35	89	83	72	53	136	70	79	49
ENSG00000005187	ACSM3	65	75	37	45	124	156	50	89	31	5	13	6	4	14	2	20	1	0
ENSG00000005189	LOC81691	1	1	0	0	2	1	0	1	1	13	26	15	1	23	4	20	7	0
ENSG00000005194	CIAPIN1	20	54	48	37	88	27	24	46	49	85	59	64	32	61	36	71	131	20
ENSG00000005206	SPPL2B	259	501	411	255	675	581	341	262	252	259	422	750	407	506	194	599	799	88
ENSG00000005238	FAM214B	9	0	2	6	12	5	0	4	12	51	2	11	16	12	4	10	11	5
ENSG00000005243	COPZ2	0	0	1	0	0	0	0	0	0	0	0	1	0	0	0	0	0	0
ENSG00000005249	PRKAR2B	129	6	29	10	130	19	26	94	13	28	47	78	305	31	10	49	2	35
ENSG00000005302	MSL3	314	254	282	230	449	380	105	348	331	78	747	234	168	129	120	129	202	230
ENSG00000005339	CREBBP	508	317	521	371	482	638	201	445	672	201	699	278	416	117	866	152	277	268
ENSG00000005379	BZRAP1	22	13	23	25	41	20	1	33	15	131	210	134	254	298	29	306	84	39
ENSG00000005381	MPO	6	31	0	5	192	81	27	93	21	97	10	105	81	1080	8	630	34	3
ENSG00000005421	PON1	2	0	0	0	0	0	0	0	0	0	0	0	0	0	0	0	0	0
ENSG00000005436	GCFC2	22	46	35	24	66	49	13	39	10	12	13	22	3	11	23	18	47	8
ENSG00000005448	WDR54	50	87	63	64	122	72	40	73	80	52	67	46	73	50	17	25	149	28
ENSG00000005469	CROT	9	3	12	13	9	11	4	1	4	9	5	7	5	3	0	6	3	2
ENSG00000005471	ABCB4	263	380	283	130	459	273	176	322	178	27	115	26	2	3	0	14	0	5
ENSG00000005483	KMT2E	2986	1703	2081	1867	2088	2429	3382	2130	1450	462	5969	1576	3905	1032	5162	1447	3071	2151
ENSG00000005486	RHBDD2	20	41	27	34	47	24	10	20	37	25	111	25	25	35	11	26	62	23
ENSG00000005513	SOX8	3	0	0	1	0	2	2	5	0	2	0	0	0	1	0	0	0	0
ENSG00000005700	IBTK	107	156	165	157	279	171	72	160	91	138	126	118	131	132	73	192	202	47
ENSG00000005801	ZNF195	39	40	45	52	69	74	19	35	27	75	48	39	35	34	61	33	56	21
ENSG00000005810	MYCBP2	1208	955	960	900	1455	1442	511	1019	885	200	782	549	1288	567	325	664	1236	371
ENSG00000005812	FBXL3	54	27	49	43	48	31	30	24	45	40	78	26	36	15	67	42	64	22
ENSG00000005844	ITGAL	130	135	171	122	461	144	89	218	200	119	84	122	93	361	22	106	103	39
ENSG00000005882	PDK2	30	19	23	16	53	35	14	25	38	40	18	37	17	12	7	16	35	9
ENSG00000005884	ITGA3	1	0	0	0	7	0	0	0	0	6	0	1	1	3	0	1	1	0
ENSG00000005889	ZFX	152	112	104	78	162	151	35	85	80	50	196	92	89	34	137	34	47	56
ENSG00000005893	LAMP2	25	26	36	24	88	59	13	39	57	155	250	155	92	156	68	128	93	64
ENSG00000005961	ITGA2B	96	8	28	33	102	17	43	82	4	4	4	11	12	4	2	4	0	0
ENSG00000005981	ASB4	0	0	0	0	0	0	0	0	0	0	0	0	0	0	0	0	0	0
ENSG00000006007	GDE1	44	105	75	51	129	66	41	81	96	132	159	102	76	90	68	117	129	20
ENSG00000006015	C19orf60	193	251	237	125	422	220	176	171	274	126	139	131	89	217	62	119	343	59
ENSG00000006016	CRLF1	0	0	0	1	0	0	0	0	0	0	0	1	0	0	0	0	0	0
ENSG00000006025	OSBPL7	26	60	64	39	130	55	21	58	49	109	24	70	37	71	9	61	89	10
ENSG00000006042	TMEM98	0	0	0	0	0	0	0	0	0	0	1	0	0	0	0	0	0	1
ENSG00000006047	YBX2	1	2	0	0	0	0	0	0	0	0	0	1	0	1	0	0	0	0
ENSG00000006059	KRT33A	0	0	0	0	0	0	0	0	0	0	0	0	0	0	0	0	0	0
ENSG00000006062	MAP3K14	59	136	105	115	206	157	71	142	96	27	25	40	12	50	7	19	72	13
ENSG00000006071	ABCC8	0	0	0	0	0	0	0	0	0	0	0	0	0	0	0	0	0	0
ENSG00000006116	CACNG3	0	0	0	0	0	0	0	0	0	0	0	0	1	0	0	0	0	0
ENSG00000006118	TMEM132A	0	1	0	2	2	0	5	1	0	0	0	0	0	0	0	0	0	0
ENSG00000006125	AP2B1	342	570	446	421	868	618	169	703	506	154	733	837	442	363	353	515	820	348
ENSG00000006128	TAC1	0	0	0	0	0	0	0	0	0	0	0	0	0	0	0	0	0	0
ENSG00000006194	ZNF263	40	93	68	48	118	83	60	74	60	73	105	105	60	48	64	66	115	22
ENSG00000006210	CX3CL1	0	1	0	0	0	0	0	0	0	0	0	0	0	0	0	0	0	0
ENSG00000006282	SPATA20	7	27	92	11	34	4	15	22	72	50	39	47	26	113	21	50	56	13
ENSG00000006283	CACNA1G	0	0	0	0	0	0	1	0	0	0	0	3	0	0	0	0	0	0
ENSG00000006327	TNFRSF12A	0	0	0	0	1	0	1	0	0	1	0	0	0	2	1	0	0	0
ENSG00000006377	DLX6	0	0	0	0	0	0	0	0	0	0	0	0	0	0	0	0	0	0
ENSG00000006432	MAP3K9	52	13	15	18	46	44	35	29	15	0	6	4	9	2	0	0	0	0
ENSG00000006451	RALA	49	131	174	89	154	120	84	99	97	85	107	129	171	130	223	137	153	39
ENSG00000006453	BAIAP2L1	7	2	1	9	3	8	3	6	1	2	2	0	0	0	0	0	0	0
ENSG00000006459	KDM7A	204	80	181	218	185	193	45	197	118	50	97	33	39	27	35	18	18	62
ENSG00000006468	ETV1	0	0	1	0	0	0	0	0	0	0	0	0	0	0	0	0	0	0
ENSG00000006530	AGK	8	7	5	6	13	10	3	5	7	18	11	22	10	17	4	15	18	2
ENSG00000006534	ALDH3B1	12	3	8	2	42	2	4	5	28	4	80	135	57	217	3	63	145	23
ENSG00000006555	TTC22	2	2	1	0	1	0	0	5	0	5	0	2	3	0	1	0	0	0
ENSG00000006576	PHTF2	174	259	188	206	351	176	201	211	108	99	136	92	35	83	31	179	112	32
ENSG00000006606	CCL26	0	0	0	0	0	0	0	0	0	0	0	0	0	0	0	0	0	0
ENSG00000006607	FARP2	64	51	59	53	106	63	27	70	35	12	32	11	31	52	49	22	44	10
ENSG00000006611	USH1C	0	0	0	0	0	0	0	0	0	0	0	0	0	0	0	0	0	0
ENSG00000006625	GGCT	23	41	43	74	100	38	9	39	48	126	98	99	18	47	80	59	105	35
ENSG00000006634	DBF4	229	103	59	36	92	169	70	110	58	5	169	65	90	24	94	33	111	23
ENSG00000006638	TBXA2R	27	42	40	28	71	39	17	37	94	8	15	20	18	12	53	23	201	34
ENSG00000006652	IFRD1	212	171	174	186	199	183	146	214	279	51	52	50	44	22	257	33	80	34
ENSG00000006659	LGALS14	0	0	0	0	0	0	0	0	0	0	0	0	0	0	0	0	0	1
ENSG00000006695	COX10	16	28	23	24	52	38	8	26	44	15	14	23	19	19	9	12	32	6
ENSG00000006704	GTF2IRD1	0	0	0	1	0	0	0	0	0	30	2	8	3	5	7	3	2	3
ENSG00000006712	PAF1	71	77	81	58	95	71	72	101	140	70	46	48	54	31	122	34	61	31
ENSG00000006715	VPS41	175	155	116	89	243	205	94	123	116	48	72	68	103	83	25	95	109	34
ENSG00000006740	ARHGAP44	0	0	1	0	3	0	0	1	0	3	0	0	4	0	6	0	3	5
ENSG00000006744	ELAC2	44	129	83	75	162	115	86	105	69	133	84	155	104	173	88	142	239	61
ENSG00000006747	SCIN	0	0	0	0	1	1	0	0	0	12	0	0	0	0	0	1	0	0
ENSG00000006756	ARSD	19	37	40	18	77	39	17	37	39	156	331	552	204	318	9	264	164	102
ENSG00000006757	PNPLA4	4	12	10	9	20	8	3	10	9	6	7	2	1	15	1	10	5	4
ENSG00000006788	MYH13	0	0	0	0	0	0	0	0	0	0	0	0	0	0	0	0	0	0
ENSG00000006831	ADIPOR2	108	99	101	113	153	121	80	103	158	146	95	285	127	173	190	160	401	81
ENSG00000006837	CDKL3	0	3	0	0	3	3	3	1	3	0	3	4	1	2	1	3	3	0
ENSG00000007001	UPP2	0	4	0	0	0	0	0	0	0	0	0	0	0	0	0	0	0	0
ENSG00000007038	PRSS21	1	14	5	14	23	19	8	4	0	8	0	2	20	1	1	7	0	0
ENSG00000007047	MARK4	67	102	71	79	156	86	68	92	102	284	60	222	151	64	95	210	210	45
ENSG00000007062	PROM1	0	0	3	0	6	0	1	2	1	7	13	124	154	105	0	185	1	6
ENSG00000007080	CCDC124	45	66	38	25	116	66	47	35	53	27	36	59	47	98	16	58	144	17
ENSG00000007129	CEACAM21	2	21	27	10	26	14	1	15	11	16	7	8	4	13	0	14	14	1
ENSG00000007168	PAFAH1B1	116	146	141	161	229	139	114	127	64	265	306	168	115	130	544	99	177	117
ENSG00000007171	NOS2	0	0	0	0	0	0	0	0	0	0	0	11	0	1	0	3	3	9
ENSG00000007174	DNAH9	0	0	0	0	0	0	0	0	2	0	0	0	0	0	0	0	0	0
ENSG00000007202	KIAA0100	109	69	80	60	117	131	27	66	84	75	90	81	113	80	68	66	110	46
ENSG00000007216	SLC13A2	0	0	0	0	0	0	0	0	0	0	0	0	0	0	0	0	0	0
ENSG00000007237	GAS7	240	122	160	106	185	146	242	214	200	74	506	286	238	276	109	157	804	453
ENSG00000007255	TRAPPC6A	203	382	275	170	428	297	221	184	369	53	194	184	76	322	52	225	253	42
ENSG00000007264	MATK	7	6	5	1	31	10	11	7	20	14	17	16	5	23	1	11	26	8
ENSG00000007306	CEACAM7	0	0	0	0	0	0	0	0	0	0	0	0	0	0	0	0	0	0
ENSG00000007312	CD79B	787	2255	1339	1083	2800	2090	529	1601	2180	345	290	376	89	345	156	867	656	186
ENSG00000007314	SCN4A	4	7	5	7	7	9	4	2	8	4	4	1	0	2	1	49	0	1
ENSG00000007341	ST7L	20	13	14	23	27	25	11	33	40	14	6	20	23	10	19	28	39	8
ENSG00000007350	TKTL1	4	0	1	0	1	1	0	2	0	5	3	1	0	1	7	0	0	1
ENSG00000007372	PAX6	0	0	0	0	0	0	0	0	0	0	0	0	0	0	0	0	0	0
ENSG00000007376	RPUSD1	30	72	40	44	90	68	43	38	54	59	29	36	53	47	24	89	156	16
ENSG00000007384	RHBDF1	0	0	0	0	4	0	0	0	0	1	4	0	0	11	6	6	10	0
ENSG00000007392	LUC7L	348	444	419	265	637	548	390	366	285	229	285	225	270	279	311	213	288	132
ENSG00000007402	CACNA2D2	0	0	0	0	2	0	0	0	0	22	0	0	3	4	6	0	1	0
ENSG00000007516	BAIAP3	46	74	76	47	85	66	77	53	59	1	0	5	3	13	1	8	0	1
ENSG00000007520	TSR3	98	218	156	104	310	177	60	147	167	113	87	129	100	126	27	196	261	31
ENSG00000007541	PIGQ	17	29	37	15	57	31	11	33	32	42	8	53	36	32	10	73	53	3
ENSG00000007545	CRAMP1	60	47	35	40	55	64	11	44	86	152	66	40	128	20	17	28	43	18
ENSG00000007866	TEAD3	1	0	0	0	0	0	0	0	0	2	0	0	0	0	0	0	0	2
ENSG00000007908	SELE	0	0	0	0	0	0	0	0	0	0	0	0	0	0	0	0	0	0
ENSG00000007923	DNAJC11	90	152	102	56	198	130	128	82	72	80	53	106	67	138	18	109	229	26
ENSG00000007933	FMO3	0	0	0	0	1	0	0	0	0	0	0	0	0	0	0	1	0	0
ENSG00000007944	MYLIP	301	424	428	516	423	412	251	523	205	114	291	493	340	91	530	179	348	279
ENSG00000007952	NOX1	0	0	0	0	0	0	0	0	0	0	0	0	0	0	0	0	0	0
ENSG00000007968	E2F2	4	27	30	24	65	39	3	23	5	468	339	670	24	46	120	61	476	69
ENSG00000008018	PSMB1	110	142	200	252	393	195	51	267	170	443	761	383	205	280	483	288	514	269
ENSG00000008056	SYN1	1	0	0	1	2	0	0	0	8	2	9	1	0	0	2	0	0	12
ENSG00000008083	JARID2	739	454	515	549	663	609	478	655	631	270	1075	246	514	377	516	332	215	291
ENSG00000008086	CDKL5	26	16	23	10	27	9	8	9	18	2	0	22	5	4	0	0	14	12
ENSG00000008118	CAMK1G	0	0	0	0	0	0	0	0	0	0	0	0	0	0	0	0	0	0
ENSG00000008128	CDK11A	189	86	140	91	119	137	38	146	102	33	210	81	218	23	218	52	63	149
ENSG00000008130	NADK	27	59	38	42	112	48	30	37	59	31	24	9	12	24	33	17	33	1
ENSG00000008196	TFAP2B	0	0	0	0	0	0	0	0	0	0	0	0	0	0	0	0	0	0
ENSG00000008197	TFAP2D	0	0	1	0	0	0	0	0	0	0	0	0	0	0	0	0	0	0
ENSG00000008226	DLEC1	0	0	0	0	3	0	0	2	0	0	0	0	0	1	0	0	0	0
ENSG00000008256	CYTH3	138	265	130	144	210	264	203	171	171	87	157	42	33	66	62	68	453	47
ENSG00000008277	ADAM22	1	1	0	0	3	0	3	0	5	0	2	0	0	1	0	6	0	0
ENSG00000008282	SYPL1	28	55	68	75	155	68	19	78	77	89	101	65	45	88	65	103	62	35
ENSG00000008283	CYB561	4	5	5	0	11	1	6	6	14	28	112	121	41	71	37	82	74	39
ENSG00000008294	SPAG9	174	93	87	65	113	188	147	104	166	35	464	127	360	63	789	107	125	309
ENSG00000008300	CELSR3	10	3	0	0	4	0	2	0	0	19	3	4	2	0	0	0	0	1
ENSG00000008311	AASS	7	0	3	6	3	6	1	3	2	13	11	17	0	0	3	11	1	5
ENSG00000008323	PLEKHG6	0	0	0	0	0	0	0	0	0	0	0	0	0	0	0	0	0	0
ENSG00000008324	SS18L2	23	58	68	62	102	54	11	68	34	96	83	56	40	51	67	45	76	27
ENSG00000008382	MPND	32	50	42	44	62	49	31	22	33	38	36	44	34	87	9	53	88	4
ENSG00000008394	MGST1	1	0	0	0	7	4	0	1	3	10	0	2	0	7	0	6	0	0
ENSG00000008405	CRY1	8	6	11	10	12	6	17	8	10	61	75	34	16	9	114	6	21	21
ENSG00000008438	PGLYRP1	8	3	4	5	121	65	0	61	73	14	0	1	0	4	0	39	0	0
ENSG00000008441	NFIX	24	47	40	26	67	37	40	41	38	95	85	104	309	146	35	188	86	22
ENSG00000008513	ST3GAL1	97	151	193	151	214	146	109	167	256	177	242	212	209	56	285	79	140	157
ENSG00000008516	MMP25	12	5	4	1	24	7	5	20	44	38	3	0	2	2	10	13	2	2
ENSG00000008517	IL32	31	7	46	5	48	3	13	49	35	90	4	59	44	65	0	35	13	6
ENSG00000008710	PKD1	173	241	188	132	309	201	136	180	124	279	142	180	201	154	36	139	194	35
ENSG00000008735	MAPK8IP2	0	0	0	0	4	1	0	0	0	2	0	5	0	1	0	0	1	0
ENSG00000008838	MED24	187	508	481	324	496	358	199	117	377	616	208	602	373	191	190	386	652	234
ENSG00000008853	RHOBTB2	32	25	56	51	134	42	5	67	77	31	22	87	15	16	1	13	40	23
ENSG00000008869	HEATR5B	92	46	69	75	117	94	45	82	82	62	14	26	83	72	20	58	52	23
ENSG00000008952	SEC62	540	557	1080	903	1129	779	118	729	565	837	969	410	351	220	449	397	278	277
ENSG00000008988	RPS20	5806	7899	7450	7952	13047	7084	6550	8249	9797	4877	8024	5811	4096	4543	6206	4604	8788	2696
ENSG00000009307	CSDE1	1065	832	816	1010	1460	1213	492	1274	1342	883	2112	882	988	671	1183	912	1295	700
ENSG00000009335	UBE3C	163	141	173	152	244	239	93	207	185	94	117	146	185	111	49	115	149	65
ENSG00000009413	REV3L	274	192	276	235	296	294	115	205	95	19	191	227	433	75	287	159	125	162
ENSG00000009694	TENM1	11	0	4	0	8	1	2	1	10	1	0	1	1	0	1	4	0	0
ENSG00000009709	PAX7	0	0	0	0	0	0	0	0	0	0	0	0	0	0	0	0	0	0
ENSG00000009724	MASP2	0	0	0	0	0	0	0	0	0	0	0	0	0	0	0	0	0	0
ENSG00000009765	IYD	0	0	0	0	0	0	0	0	0	0	0	0	0	0	0	0	0	0
ENSG00000009780	FAM76A	34	48	49	42	90	70	13	71	47	25	44	24	38	47	29	28	70	11
ENSG00000009790	TRAF3IP3	257	328	356	396	796	489	48	515	408	346	77	75	77	191	31	97	277	33
ENSG00000009830	POMT2	32	69	47	44	89	53	31	60	20	45	69	81	48	41	41	45	72	27
ENSG00000009844	VTA1	13	49	40	35	125	45	8	51	30	120	58	78	29	82	20	68	85	20
ENSG00000009950	MLXIPL	0	0	0	0	0	0	0	0	0	0	0	0	0	0	0	0	0	0
ENSG00000009954	BAZ1B	306	328	357	244	463	446	108	324	363	141	477	300	358	133	346	169	279	198
ENSG00000010017	RANBP9	20	9	25	41	38	37	8	22	26	70	73	39	31	18	75	37	35	32
ENSG00000010030	ETV7	0	0	0	0	0	0	0	0	0	14	3	0	11	31	0	2	1	0
ENSG00000010072	SPRTN	29	25	21	25	27	38	11	36	27	26	60	23	15	30	28	15	35	18
ENSG00000010165	METTL13	14	27	25	13	82	31	5	32	25	72	5	43	14	64	6	51	40	4
ENSG00000010219	DYRK4	24	12	22	47	58	33	1	29	21	6	23	26	10	8	0	19	17	5
ENSG00000010244	ZNF207	382	216	346	337	530	462	239	359	204	305	696	481	577	360	864	458	703	249
ENSG00000010256	UQCRC1	56	66	91	93	127	98	41	123	132	336	144	124	76	114	55	134	166	45
ENSG00000010270	STARD3NL	12	11	12	20	27	12	14	8	6	46	19	17	22	35	19	21	27	15
ENSG00000010278	CD9	30	7	16	115	64	38	2	32	4	39	663	244	89	22	309	48	146	256
ENSG00000010282	HHATL	0	0	0	0	0	0	0	0	0	0	0	0	0	0	0	0	0	0
ENSG00000010292	NCAPD2	35	25	25	30	59	63	9	39	51	199	54	63	34	45	24	66	83	17
ENSG00000010295	IFFO1	59	125	102	103	208	102	43	130	96	221	61	106	158	145	39	104	195	41
ENSG00000010310	GIPR	1	0	0	0	1	0	1	0	0	0	2	0	8	30	0	3	0	0
ENSG00000010318	PHF7	21	44	29	25	30	25	6	21	19	23	36	24	26	13	8	30	15	11
ENSG00000010319	SEMA3G	0	0	0	0	0	0	0	0	0	0	0	2	0	0	0	0	27	0
ENSG00000010322	NISCH	125	203	168	120	293	153	73	163	112	215	132	125	116	134	65	133	179	27
ENSG00000010327	STAB1	6	6	2	1	31	6	1	9	0	26	12	37	30	145	0	76	15	25
ENSG00000010361	FUZ	54	24	48	46	61	29	2	64	37	56	12	25	12	23	13	12	18	8
ENSG00000010379	SLC6A13	0	1	1	2	0	0	0	0	0	2	0	0	4	0	1	0	0	0
ENSG00000010404	IDS	317	280	397	528	471	558	194	466	392	93	256	211	274	287	79	223	133	125
ENSG00000010438	PRSS3	0	1	0	0	1	0	1	0	0	0	0	0	0	0	0	0	0	0
ENSG00000010539	ZNF200	6	24	15	12	23	12	6	13	4	18	14	23	7	14	8	12	9	10
ENSG00000010610	CD4	22	6	17	6	41	6	0	27	40	53	2	5	10	95	2	27	42	2
ENSG00000010626	LRRC23	36	55	42	20	54	18	29	41	25	44	16	12	26	40	25	34	26	2
ENSG00000010671	BTK	151	192	138	112	344	242	61	145	243	65	156	131	93	103	48	81	129	107
ENSG00000010704	HFE	0	1	0	2	1	1	0	2	1	5	0	5	0	5	0	0	3	0
ENSG00000010803	SCMH1	17	20	13	30	33	18	3	31	31	122	56	49	71	24	31	49	60	18
ENSG00000010810	FYN	163	139	174	210	252	134	76	174	169	143	202	162	93	156	78	176	211	84
ENSG00000010818	HIVEP2	43	34	55	62	79	69	49	49	70	126	70	33	20	32	242	50	54	35
ENSG00000010932	FMO1	3	5	3	3	8	1	0	9	7	0	0	0	0	0	0	0	0	0
ENSG00000011007	TCEB3	23	14	41	19	44	35	18	40	41	69	62	47	85	10	79	17	45	47
ENSG00000011009	LYPLA2	47	163	128	95	266	157	69	166	145	227	87	89	75	170	39	114	228	28
ENSG00000011021	CLCN6	19	24	32	53	55	44	16	39	8	31	27	7	14	13	20	8	11	9
ENSG00000011028	MRC2	1	0	3	0	2	0	5	3	0	21	3	39	0	6	3	3	0	1
ENSG00000011052	NME1-NME2	0	0	0	0	0	0	0	0	0	0	0	0	0	0	0	0	0	0
ENSG00000011083	SLC6A7	0	0	0	0	0	0	0	0	0	0	0	0	0	0	0	0	2	0
ENSG00000011105	TSPAN9	6	3	4	2	15	4	9	4	1	36	4	12	12	4	33	8	0	2
ENSG00000011114	BTBD7	152	134	184	135	204	150	66	134	188	77	220	227	225	68	117	91	156	95
ENSG00000011132	APBA3	35	44	30	34	65	30	10	55	40	52	20	21	13	27	7	22	30	10
ENSG00000011143	MKS1	1	2	12	8	8	0	0	3	5	36	6	20	14	19	5	26	14	5
ENSG00000011198	ABHD5	7	0	3	10	4	6	2	5	1	9	22	2	4	8	8	5	7	2
ENSG00000011201	ANOS1	0	0	0	0	0	0	0	0	0	0	0	0	0	0	0	0	0	0
ENSG00000011243	AKAP8L	73	100	64	78	175	122	31	102	96	120	54	97	112	85	117	80	169	48
ENSG00000011258	MBTD1	48	24	41	35	55	69	17	34	30	24	32	43	48	29	38	36	28	26
ENSG00000011260	UTP18	34	32	39	36	81	53	26	52	62	36	77	71	61	29	83	32	83	37
ENSG00000011275	RNF216	230	175	215	86	269	222	121	164	237	76	212	133	121	110	78	78	109	72
ENSG00000011295	TTC19	133	267	235	125	313	209	133	231	98	203	298	318	209	253	132	235	434	130
ENSG00000011304	PTBP1	371	624	501	247	1181	564	688	639	619	859	666	897	533	731	568	735	1570	127
ENSG00000011332	DPF1	5	2	1	2	7	4	7	4	4	3	2	3	2	24	3	2	6	1
ENSG00000011347	SYT7	0	0	0	0	0	0	0	0	0	0	0	0	0	0	0	0	0	0
ENSG00000011376	LARS2	6	14	18	18	42	18	10	31	12	20	13	15	15	25	10	20	41	5
ENSG00000011405	PIK3C2A	237	220	274	155	211	264	138	195	136	53	280	155	248	64	74	69	91	109
ENSG00000011422	PLAUR	133	9	51	24	57	40	1	88	181	156	109	86	128	38	65	21	49	4
ENSG00000011426	ANLN	2	1	0	1	0	0	2	1	1	24	35	18	4	14	12	11	13	11
ENSG00000011451	WIZ	31	51	49	54	103	42	17	45	26	125	62	73	62	35	53	65	96	23
ENSG00000011465	DCN	0	0	0	0	0	0	0	0	0	0	0	2	0	0	5	1	0	0
ENSG00000011478	QPCTL	2	0	2	6	1	1	0	2	0	1	2	3	0	1	9	0	0	0
ENSG00000011485	PPP5C	28	69	62	59	87	70	21	64	52	149	44	52	70	21	6	27	48	14
ENSG00000011523	CEP68	63	58	59	47	89	90	35	103	64	113	163	248	137	98	17	155	181	124
ENSG00000011566	MAP4K3	27	13	11	12	15	27	22	26	12	15	131	43	61	10	71	41	61	49
ENSG00000011590	ZBTB32	0	0	0	0	2	0	3	2	0	2	3	0	0	1	0	0	0	2
ENSG00000011600	TYROBP	397	131	284	80	962	181	75	480	668	247	155	183	117	2032	22	686	945	43
ENSG00000011638	TMEM159	35	19	13	17	43	35	4	15	44	6	48	16	2	4	362	5	8	10
ENSG00000011677	GABRA3	0	0	0	0	0	0	0	0	0	0	0	9	0	0	1	0	0	0
ENSG00000012048	BRCA1	15	12	18	13	28	22	4	8	11	96	41	152	42	50	20	52	93	12
ENSG00000012061	ERCC1	70	89	108	77	152	100	44	76	104	93	89	74	66	114	39	106	152	33
ENSG00000012124	CD22	1142	2399	2007	1368	3754	2396	1344	1946	1697	625	625	213	278	69	856	94	546	115
ENSG00000012171	SEMA3B	2	2	1	0	6	0	1	2	2	3	4	4	4	0	7	0	0	0
ENSG00000012174	MBTPS2	17	23	19	8	29	7	0	19	1	21	14	29	12	22	4	19	25	17
ENSG00000012211	PRICKLE3	4	8	5	3	13	3	0	7	8	2	1	5	3	3	2	0	5	3
ENSG00000012223	LTF	10	6	7	13	391	113	4	358	100	20	2	4	0	19	3	103	0	0
ENSG00000012232	EXTL3	34	52	50	60	71	39	5	63	59	85	11	46	24	28	8	15	71	7
ENSG00000012504	NR1H4	0	0	0	0	0	0	0	0	0	0	1	0	0	0	0	0	0	0
ENSG00000012660	ELOVL5	169	222	278	279	425	348	163	261	180	108	141	46	70	88	56	97	60	61
ENSG00000012779	ALOX5	153	146	213	373	465	347	35	230	183	427	89	163	145	38	17	35	28	77
ENSG00000012817	KDM5D	0	0	0	60	0	1	23	61	0	136	0	0	0	0	0	55	49	0
ENSG00000012822	CALCOCO1	45	22	43	40	74	51	13	33	39	41	23	28	43	38	7	36	35	22
ENSG00000012963	UBR7	24	16	31	17	70	22	15	22	18	89	77	71	27	30	27	35	47	15
ENSG00000012983	MAP4K5	217	219	195	249	314	233	85	296	108	66	202	160	145	94	165	160	180	88
ENSG00000013016	EHD3	36	39	32	36	77	39	31	45	32	32	3	12	17	14	3	22	60	6
ENSG00000013275	PSMC4	79	170	126	86	224	140	55	153	144	395	248	165	138	125	308	162	288	71
ENSG00000013288	MAN2B2	40	96	120	81	118	77	11	111	59	157	60	58	30	114	14	49	58	19
ENSG00000013293	SLC7A14	0	0	0	0	0	0	0	0	0	0	0	0	0	0	0	0	0	0
ENSG00000013297	CLDN11	0	1	0	0	1	0	1	0	0	0	0	0	0	0	0	0	0	0
ENSG00000013306	SLC25A39	126	233	213	164	347	150	113	225	243	418	282	317	239	183	100	222	297	38
ENSG00000013364	MVP	59	83	76	80	185	86	73	94	85	58	57	65	43	195	8	89	193	20
ENSG00000013374	NUB1	219	192	147	137	359	346	88	213	321	190	200	208	247	237	56	173	187	87
ENSG00000013375	PGM3	25	28	18	15	46	34	9	42	27	19	23	36	5	7	19	12	24	7
ENSG00000013392	RWDD2A	0	3	0	2	7	2	0	0	0	0	0	7	0	0	0	1	4	4
ENSG00000013441	CLK1	677	526	477	529	575	484	394	529	561	256	444	185	356	114	1754	166	282	158
ENSG00000013503	POLR3B	9	7	24	12	14	19	10	13	16	15	21	11	14	10	7	11	8	2
ENSG00000013523	ANGEL1	4	8	3	6	12	3	1	8	5	16	4	4	2	0	2	7	4	6
ENSG00000013561	RNF14	6	9	13	18	48	20	6	11	10	74	25	35	8	40	4	19	26	5
ENSG00000013563	DNASE1L1	13	14	25	25	27	23	7	25	31	10	48	18	6	24	5	19	31	18
ENSG00000013573	DDX11	44	70	48	36	113	65	32	43	44	52	58	51	43	37	25	49	73	8
ENSG00000013583	HEBP1	8	21	7	17	40	9	2	12	32	34	21	29	10	45	5	40	63	13
ENSG00000013588	GPRC5A	0	0	0	0	0	0	0	0	0	0	0	0	0	0	1	0	0	0
ENSG00000013619	MAMLD1	4	7	1	3	6	4	6	3	4	21	17	17	5	0	2	3	0	3
ENSG00000013725	CD6	25	11	45	17	76	8	9	46	20	45	29	14	20	5	3	5	1	3
ENSG00000013810	TACC3	71	52	66	66	148	49	26	95	78	492	516	419	208	176	165	199	212	142
ENSG00000014123	UFL1	106	96	150	89	151	166	42	137	43	40	202	101	77	80	80	71	85	88
ENSG00000014138	POLA2	7	25	6	6	27	14	3	16	19	79	17	23	7	41	14	21	64	3
ENSG00000014164	ZC3H3	12	17	31	2	44	30	23	18	12	32	23	31	19	67	5	42	41	11
ENSG00000014216	CAPN1	47	82	65	79	222	99	31	124	120	98	124	103	73	199	27	128	337	28
ENSG00000014257	ACPP	2	0	0	0	2	8	0	4	1	3	2	1	2	11	0	3	0	0
ENSG00000014641	MDH1	51	123	93	96	235	137	37	130	112	183	83	130	59	171	69	121	226	29
ENSG00000014824	SLC30A9	68	79	62	45	121	70	16	61	48	57	86	100	45	60	4	62	133	42
ENSG00000014914	MTMR11	1	1	4	0	8	0	0	1	6	1	3	0	0	6	3	1	0	0
ENSG00000014919	COX15	22	48	48	34	102	54	21	44	31	62	4	56	13	50	7	46	55	7
ENSG00000015133	CCDC88C	635	775	776	466	1039	659	584	674	745	270	535	302	186	201	160	232	443	240
ENSG00000015153	YAF2	85	111	86	55	165	103	36	82	124	42	125	63	75	46	137	113	66	44
ENSG00000015171	ZMYND11	130	118	90	94	194	121	62	94	142	117	34	205	168	105	66	211	188	57
ENSG00000015285	WAS	306	348	387	606	728	445	59	607	799	939	561	492	237	327	79	327	507	229
ENSG00000015413	DPEP1	0	0	0	0	0	0	0	0	0	672	49	6	364	35	2	227	0	31
ENSG00000015475	BID	21	9	22	23	51	31	17	26	37	92	55	30	38	81	6	37	127	9
ENSG00000015479	MATR3	5	2	5	3	4	5	2	1	4	0	4	3	7	2	11	0	3	5
ENSG00000015520	NPC1L1	0	1	0	0	0	0	2	0	0	0	0	0	0	0	1	0	0	0
ENSG00000015532	XYLT2	19	36	34	23	54	33	29	41	28	50	8	53	34	19	11	21	44	7
ENSG00000015568	RGPD5	0	0	0	0	0	0	1	0	0	0	0	0	0	0	0	0	0	0
ENSG00000015592	STMN4	0	0	0	0	0	0	0	1	0	0	0	1	0	1	0	0	0	0
ENSG00000015676	NUDCD3	206	337	277	171	371	333	179	279	221	137	83	187	117	129	37	166	274	61
ENSG00000016082	ISL1	0	0	0	0	0	0	0	0	0	0	0	0	0	0	0	0	0	0
ENSG00000016391	CHDH	0	3	1	0	0	0	0	0	5	0	0	0	0	1	0	0	0	0
ENSG00000016402	IL20RA	0	0	0	0	0	0	0	0	0	0	0	0	0	2	0	0	0	0
ENSG00000016490	CLCA1	0	0	0	0	0	0	0	0	0	0	0	0	0	0	0	0	0	0
ENSG00000016602	CLCA4	0	0	0	0	0	0	0	0	0	0	0	2	0	0	0	0	0	0
ENSG00000016864	GLT8D1	6	15	29	26	48	21	6	26	22	63	12	38	26	23	2	31	33	7
ENSG00000017260	ATP2C1	44	43	56	47	75	49	36	48	33	42	79	45	44	40	43	70	62	15
ENSG00000017427	IGF1	0	1	1	0	0	1	0	0	0	0	0	0	0	0	0	0	0	3
ENSG00000017483	SLC38A5	30	60	41	33	119	65	42	40	63	108	79	219	41	150	11	81	245	21
ENSG00000017797	RALBP1	115	124	162	173	221	198	30	165	171	104	219	149	139	89	150	125	142	169
ENSG00000018189	RUFY3	251	189	217	174	306	281	98	238	154	81	75	60	211	159	31	130	110	79
ENSG00000018236	CNTN1	0	0	0	0	0	0	0	0	0	0	0	0	0	0	0	0	0	0
ENSG00000018280	SLC11A1	130	34	57	20	143	38	8	54	237	12	16	6	6	30	3	84	15	2
ENSG00000018408	WWTR1	1	0	0	0	0	3	0	0	0	0	0	1	0	0	0	2	0	0
ENSG00000018510	AGPS	18	15	15	18	42	25	8	43	16	31	50	40	45	77	9	313	105	0
ENSG00000018610	CXorf56	16	19	39	16	51	24	13	26	31	38	80	48	13	34	35	30	43	17
ENSG00000018625	ATP1A2	0	0	0	0	0	0	0	0	0	0	0	0	0	0	0	0	0	0
ENSG00000018699	TTC27	11	5	12	13	27	20	5	23	17	8	12	5	14	4	9	15	16	7
ENSG00000018869	ZNF582	8	15	10	15	14	5	4	15	9	7	6	7	1	6	1	6	2	4
ENSG00000019102	VSIG2	2	6	0	0	2	1	7	0	1	1	0	0	1	3	1	3	0	0
ENSG00000019144	PHLDB1	0	0	0	0	0	0	2	0	0	5	2	8	14	4	2	12	4	1
ENSG00000019169	MARCO	1	0	0	0	6	0	0	3	2	0	2	1	3	5	0	0	0	0
ENSG00000019186	CYP24A1	0	0	0	0	0	0	0	0	0	0	0	0	0	0	0	0	0	0
ENSG00000019485	PRDM11	14	11	31	18	20	13	10	21	19	12	1	8	8	6	0	28	0	2
ENSG00000019505	SYT13	0	0	0	0	0	0	0	0	0	0	0	0	1	0	0	0	0	0
ENSG00000019549	SNAI2	0	0	0	0	0	0	0	0	0	0	0	1	0	0	0	0	0	0
ENSG00000019582	CD74	19921	30854	23478	21391	40732	27056	18432	25797	30875	11038	12035	8192	5405	27277	1891	12216	11632	3293
ENSG00000019991	HGF	0	0	1	0	1	0	0	1	2	5	27	20	35	69	3	34	8	14
ENSG00000019995	ZRANB1	201	148	121	131	177	234	127	125	157	123	253	178	305	79	509	122	122	132
ENSG00000020129	NCDN	75	187	156	109	186	93	38	122	77	85	10	140	80	134	22	331	248	6
ENSG00000020181	ADGRA2	0	0	0	0	2	0	0	0	0	0	0	1	1	0	1	0	1	0
ENSG00000020256	ZFP64	16	17	15	12	29	17	4	18	14	25	5	12	9	18	6	12	36	2
ENSG00000020426	MNAT1	48	12	33	23	34	53	11	31	27	8	46	19	41	8	38	16	15	35
ENSG00000020577	SAMD4A	6	3	4	12	8	7	18	5	13	0	2	1	2	22	30	6	2	6
ENSG00000020633	RUNX3	495	573	692	554	1061	664	778	765	826	91	630	121	85	476	13	258	32	91
ENSG00000020922	MRE11A	126	119	131	113	237	188	57	183	130	97	94	156	143	93	97	156	141	81
ENSG00000021300	PLEKHB1	1	4	7	8	6	4	1	5	4	1	0	4	10	3	0	1	46	0
ENSG00000021355	SERPINB1	73	147	111	131	317	130	49	175	182	96	300	254	266	820	56	617	168	68
ENSG00000021461	CYP3A43	0	0	0	0	0	0	0	0	0	0	0	0	0	0	0	0	0	0
ENSG00000021488	SLC7A9	1	1	0	1	0	0	0	2	0	5	0	0	0	1	0	0	0	0
ENSG00000021574	SPAST	29	30	41	53	70	52	12	43	26	55	13	28	24	32	1	35	34	3
ENSG00000021645	NRXN3	0	0	1	0	0	0	0	0	0	47	10	77	0	24	2	99	0	4
ENSG00000021762	OSBPL5	4	2	17	7	32	6	10	19	27	37	27	43	56	105	10	55	65	19
ENSG00000021776	AQR	82	137	117	118	223	153	42	129	90	97	152	135	113	84	68	127	162	46
ENSG00000021826	CPS1	0	0	0	0	0	0	0	0	0	0	0	0	0	1	0	0	1	0
ENSG00000021852	C8B	0	0	0	0	0	0	0	0	0	0	0	0	0	0	0	0	0	0
ENSG00000022267	FHL1	9	14	6	7	13	20	1	15	2	8	167	96	25	54	37	72	262	61
ENSG00000022277	RTFDC1	104	193	189	87	424	284	91	163	246	127	136	93	147	262	166	203	315	67
ENSG00000022355	GABRA1	2	0	0	0	0	1	0	0	1	0	0	0	0	0	0	0	0	0
ENSG00000022556	NLRP2	39	41	45	19	41	37	4	7	18	2	62	5	0	94	8	4	3	0
ENSG00000022567	SLC45A4	18	9	9	10	28	18	15	9	14	9	4	9	3	4	7	5	0	3
ENSG00000022840	RNF10	137	168	187	184	310	190	84	230	222	255	380	168	187	153	927	180	272	121
ENSG00000022976	ZNF839	92	69	84	67	131	81	20	44	51	31	53	146	50	39	6	66	38	38
ENSG00000023041	ZDHHC6	34	50	58	66	65	75	30	52	42	122	68	57	52	54	15	48	60	39
ENSG00000023171	GRAMD1B	4	0	1	1	3	2	0	2	3	80	9	7	60	30	28	14	10	7
ENSG00000023191	RNH1	63	81	118	90	197	107	43	136	114	132	86	123	80	258	20	116	206	25
ENSG00000023228	NDUFS1	60	67	54	35	103	64	29	68	59	93	99	93	72	56	23	61	141	30
ENSG00000023287	RB1CC1	355	237	252	198	389	393	167	273	159	48	859	274	335	90	597	148	290	247
ENSG00000023318	ERP44	49	65	118	117	204	135	29	139	90	89	198	88	66	78	140	87	80	36
ENSG00000023330	ALAS1	4	2	7	5	16	14	2	15	13	13	12	11	9	8	13	2	7	6
ENSG00000023445	BIRC3	2004	3064	2719	1435	4143	2423	5080	2263	1709	86	105	26	30	74	108	71	25	44
ENSG00000023516	AKAP11	129	120	114	113	180	199	28	134	97	26	81	59	59	29	37	42	83	39
ENSG00000023572	GLRX2	4	3	3	0	9	5	0	2	6	18	7	10	11	16	2	13	15	7
ENSG00000023608	SNAPC1	32	25	53	44	54	69	18	66	25	27	35	59	42	32	83	40	23	43
ENSG00000023697	DERA	7	1	13	24	24	4	0	15	5	33	35	26	10	11	6	15	19	6
ENSG00000023734	STRAP	92	77	128	92	164	140	48	153	67	88	274	102	64	142	468	138	379	44
ENSG00000023839	ABCC2	3	6	2	6	1	9	2	2	1	0	6	4	3	0	0	0	5	2
ENSG00000023892	DEF6	75	178	105	116	229	155	72	111	134	203	65	105	51	128	25	107	192	52
ENSG00000023902	PLEKHO1	514	992	646	663	1733	921	452	1018	1066	366	843	566	355	984	573	481	1073	159
ENSG00000023909	GCLM	16	12	19	10	26	28	3	28	18	53	11	24	26	4	8	18	16	6
ENSG00000024048	UBR2	273	222	260	152	295	301	114	150	138	112	149	216	143	169	76	144	184	123
ENSG00000024422	EHD2	1	3	0	0	1	0	0	0	5	0	0	3	85	4	0	1	0	0
ENSG00000024526	DEPDC1	0	0	0	0	1	0	0	0	0	19	4	33	0	12	2	14	25	0
ENSG00000024862	CCDC28A	46	35	45	61	65	85	6	55	47	84	115	84	45	25	72	44	32	54
ENSG00000025039	RRAGD	11	8	8	7	29	15	18	7	15	42	149	406	73	5	26	25	2	66
ENSG00000025156	HSF2	42	32	40	66	65	52	19	74	34	141	335	112	70	29	198	34	111	96
ENSG00000025293	PHF20	405	325	377	332	378	295	414	321	459	136	155	60	191	100	161	148	153	121
ENSG00000025423	HSD17B6	0	0	0	0	3	1	0	1	0	0	0	0	1	0	0	2	3	2
ENSG00000025434	NR1H3	2	10	8	5	9	4	0	4	3	10	9	11	9	19	6	10	16	2
ENSG00000025708	TYMP	96	60	86	57	179	58	135	89	74	5	26	13	6	474	9	52	36	6
ENSG00000025770	NCAPH2	87	164	86	44	175	143	111	93	99	61	125	122	55	107	104	54	182	27
ENSG00000025772	TOMM34	54	92	87	74	168	81	58	71	32	99	27	18	28	66	72	60	116	10
ENSG00000025796	SEC63	157	150	202	157	279	227	52	198	134	163	739	282	309	97	437	183	334	338
ENSG00000025800	KPNA6	355	261	366	206	351	333	118	327	357	150	290	230	252	117	405	139	211	116
ENSG00000026025	VIM	510	257	300	303	745	395	192	352	800	200	1567	326	295	836	613	603	2510	665
ENSG00000026036	RTEL1-TNFRSF6B	1	0	0	0	0	2	0	0	0	0	0	0	0	0	3	0	0	0
ENSG00000026103	FAS	1	1	2	1	6	1	4	3	2	3	6	1	6	17	0	10	3	2
ENSG00000026297	RNASET2	537	941	1102	1078	1413	846	226	1182	759	1487	457	1070	812	1419	354	1323	1794	808
ENSG00000026508	CD44	294	299	411	382	730	417	279	471	430	99	623	242	373	582	846	298	1131	176
ENSG00000026559	KCNG1	0	1	0	0	0	0	0	0	0	3	0	3	0	1	26	0	0	0
ENSG00000026652	AGPAT4	64	96	75	89	124	91	78	98	66	28	5	6	25	48	1	305	9	9
ENSG00000026751	SLAMF7	2	0	9	3	22	6	6	7	1	40	5	9	5	240	8	7	3	2
ENSG00000026950	BTN3A1	267	320	205	198	468	219	189	211	179	198	63	145	117	192	38	226	132	38
ENSG00000027001	MIPEP	13	15	7	14	22	16	4	16	2	8	3	7	3	8	1	3	16	4
ENSG00000027075	PRKCH	44	12	18	5	38	5	29	30	15	156	85	85	153	74	18	164	36	54
ENSG00000027644	INSRR	0	0	0	0	0	0	0	0	0	0	0	0	0	0	0	1	0	0
ENSG00000027697	IFNGR1	15	3	22	13	31	8	0	10	7	26	21	11	7	8	3	18	29	16
ENSG00000027847	B4GALT7	22	72	61	47	93	47	20	50	62	91	42	59	60	53	10	58	43	18
ENSG00000027869	SH2D2A	8	11	28	1	12	10	25	8	12	34	14	14	5	11	53	8	15	9
ENSG00000028116	VRK2	126	62	52	60	88	168	24	73	58	13	97	48	51	69	27	46	66	22
ENSG00000028137	TNFRSF1B	199	137	170	74	392	127	127	177	388	126	139	276	209	441	42	362	444	87
ENSG00000028203	VEZT	146	73	82	56	121	140	77	90	90	50	325	111	158	63	322	132	149	91
ENSG00000028277	POU2F2	2698	3033	3585	3227	5431	4217	1120	3162	3237	217	283	646	336	667	87	198	1622	270
ENSG00000028310	BRD9	330	423	467	233	590	491	293	351	293	152	371	304	392	314	252	282	661	185
ENSG00000028528	SNX1	83	154	118	154	262	184	31	155	91	223	110	105	83	118	73	154	172	54
ENSG00000028839	TBPL1	10	7	26	35	33	17	2	15	14	45	25	20	10	13	21	14	28	12
ENSG00000029153	ARNTL2	5	2	0	1	4	1	0	0	1	0	3	0	0	3	2	4	0	0
ENSG00000029363	BCLAF1	677	379	424	361	644	603	253	459	298	218	1194	584	754	236	2369	366	675	648
ENSG00000029364	SLC39A9	11	24	27	34	53	23	2	26	25	64	34	68	27	37	19	64	41	26
ENSG00000029534	ANK1	75	177	154	38	148	45	81	61	36	204	41	80	31	27	29	126	16	5
ENSG00000029559	IBSP	0	0	0	0	0	0	0	0	0	0	0	0	0	0	0	0	0	0
ENSG00000029639	TFB1M	20	38	64	73	102	46	4	70	41	25	19	40	50	52	9	56	57	17
ENSG00000029725	RABEP1	407	298	381	240	456	483	105	371	340	72	148	150	198	72	129	94	141	170
ENSG00000029993	HMGB3	4	8	15	13	5	6	9	11	1	120	144	151	34	32	20	42	101	39
ENSG00000030066	NUP160	44	49	77	75	88	64	16	50	57	58	36	25	24	23	33	17	54	12
ENSG00000030110	BAK1	71	67	80	46	86	72	125	48	41	26	63	39	37	62	30	31	81	18
ENSG00000030304	MUSK	0	0	0	0	0	0	0	0	0	0	0	0	0	0	0	0	1	0
ENSG00000030419	IKZF2	87	151	134	127	133	160	45	132	89	26	7	7	27	8	2	26	0	2
ENSG00000030582	GRN	382	728	462	264	1543	758	555	451	876	258	205	723	579	2820	32	885	790	129
ENSG00000031003	FAM13B	81	54	57	47	158	106	53	84	75	30	88	42	72	42	89	71	98	34
ENSG00000031081	ARHGAP31	19	25	14	6	36	13	12	23	33	15	4	8	3	135	0	18	18	4
ENSG00000031691	CENPQ	17	30	24	19	69	51	8	49	27	10	40	53	16	12	16	22	29	14
ENSG00000031698	SARS	138	179	165	82	253	233	76	135	221	57	180	138	131	118	327	107	195	146
ENSG00000031823	RANBP3	87	118	170	67	240	133	106	121	88	275	133	136	95	127	81	126	236	42
ENSG00000032219	ARID4A	562	412	647	475	698	651	266	572	373	87	768	406	493	176	752	284	338	488
ENSG00000032389	TSSC1	23	31	25	37	56	34	7	41	27	115	47	25	28	41	7	32	39	8
ENSG00000032444	PNPLA6	86	104	127	48	143	104	76	94	60	57	40	44	53	145	14	86	98	11
ENSG00000032742	IFT88	40	27	35	38	49	52	6	22	46	15	29	34	57	21	8	54	38	18
ENSG00000033011	ALG1	8	21	17	8	55	40	7	13	21	25	3	31	12	20	0	21	38	3
ENSG00000033030	ZCCHC8	75	55	59	45	77	56	49	57	51	66	103	50	80	83	203	49	75	60
ENSG00000033050	ABCF2	39	65	56	37	69	43	15	46	55	64	40	37	59	50	39	44	94	10
ENSG00000033100	CHPF2	34	91	48	83	164	97	37	113	85	46	97	37	58	75	35	64	106	21
ENSG00000033122	LRRC7	0	0	1	0	0	0	0	0	0	0	0	0	2	1	0	0	0	0
ENSG00000033170	FUT8	131	45	49	64	90	115	27	82	87	17	45	55	28	10	13	15	45	32
ENSG00000033178	UBA6	199	166	189	105	246	271	128	183	166	76	340	162	154	100	251	100	167	115
ENSG00000033327	GAB2	97	51	67	45	187	70	43	77	99	306	1234	310	225	238	613	328	450	201
ENSG00000033627	ATP6V0A1	93	138	170	79	208	121	102	106	104	13	1	22	12	34	2	21	5	2
ENSG00000033800	PIAS1	178	136	137	153	223	259	77	130	142	125	279	168	175	96	321	185	160	115
ENSG00000033867	SLC4A7	279	241	272	312	386	349	156	300	286	235	122	85	205	146	166	253	302	140
ENSG00000034053	APBA2	19	4	26	1	27	4	2	18	14	28	17	9	21	7	1	5	3	2
ENSG00000034152	MAP2K3	139	109	150	271	300	220	55	199	185	470	273	162	224	103	339	152	499	169
ENSG00000034239	EFCAB1	0	0	0	0	0	0	0	0	0	0	0	0	0	0	0	0	0	0
ENSG00000034510	TMSB10	1414	2302	2410	4127	6234	2836	554	3337	3769	6008	4832	2066	1425	3240	998	2672	4200	1863
ENSG00000034533	ASTE1	5	11	10	8	23	16	2	7	6	13	5	11	3	5	6	18	6	2
ENSG00000034677	RNF19A	253	104	98	85	156	198	114	116	179	29	144	61	79	42	97	34	84	40
ENSG00000034693	PEX3	3	6	12	6	17	5	0	12	5	12	6	4	7	10	6	6	8	3
ENSG00000034713	GABARAPL2	60	77	106	141	165	108	19	152	84	360	88	97	45	120	86	70	93	25
ENSG00000034971	MYOC	0	0	0	0	0	0	0	0	0	0	0	0	0	0	0	0	0	0
ENSG00000035115	SH3YL1	39	41	49	33	74	41	19	50	48	48	16	27	33	28	29	40	29	11
ENSG00000035141	FAM136A	28	28	32	35	58	49	11	38	75	32	42	23	34	20	27	39	46	18
ENSG00000035403	VCL	175	117	132	115	156	156	162	172	71	55	69	91	76	154	40	91	143	29
ENSG00000035499	DEPDC1B	2	0	0	0	1	0	1	0	0	32	4	5	2	3	3	7	7	4
ENSG00000035664	DAPK2	6	6	6	3	13	6	8	13	19	2	16	3	123	30	1	14	8	2
ENSG00000035681	NSMAF	14	10	24	32	29	21	1	28	12	72	41	28	20	25	20	36	39	21
ENSG00000035687	ADSS	57	22	46	54	79	63	5	71	61	58	69	38	36	43	28	30	65	21
ENSG00000035720	STAP1	227	202	289	183	370	263	65	246	178	33	10	3	32	106	293	35	92	5
ENSG00000035862	TIMP2	73	59	88	55	166	106	103	87	119	143	270	287	242	328	238	172	9	108
ENSG00000035928	RFC1	312	310	293	275	474	385	127	374	216	134	638	494	278	154	413	233	424	288
ENSG00000036054	TBC1D23	29	32	15	29	34	32	7	33	30	32	50	22	34	18	37	24	21	19
ENSG00000036257	CUL3	119	58	98	139	149	147	24	117	79	90	216	63	84	40	303	62	91	46
ENSG00000036448	MYOM2	12	18	10	7	38	25	70	67	10	74	1	30	15	9	11	26	22	5
ENSG00000036473	OTC	0	0	1	0	0	0	0	0	0	0	0	0	0	0	0	0	0	0
ENSG00000036530	CYP46A1	3	1	0	4	2	8	3	2	0	14	28	11	11	0	18	6	0	15
ENSG00000036549	ZZZ3	120	100	149	96	105	135	39	140	91	63	171	123	113	83	86	83	122	63
ENSG00000036565	SLC18A1	0	0	1	0	0	0	0	0	0	0	0	0	0	0	0	0	0	0
ENSG00000036672	USP2	0	0	0	0	0	0	0	0	0	0	0	1	2	0	0	0	3	0
ENSG00000036828	CASR	0	0	0	0	0	0	0	0	0	0	0	1	0	0	0	0	0	0
ENSG00000037042	TUBG2	5	4	2	1	10	3	0	2	11	27	1	41	7	29	0	24	4	4
ENSG00000037241	RPL26L1	2	3	4	11	9	7	2	6	5	39	34	26	19	27	31	26	25	11
ENSG00000037280	FLT4	0	0	0	0	0	0	0	0	0	156	96	209	2	115	152	77	479	59
ENSG00000037474	NSUN2	56	39	51	105	119	90	15	56	33	146	75	50	33	33	67	40	80	9
ENSG00000037637	FBXO42	66	55	76	56	70	72	38	66	43	63	31	33	35	51	16	43	42	6
ENSG00000037749	MFAP3	1	3	7	1	1	2	2	1	1	8	4	3	4	12	0	4	3	5
ENSG00000037757	MRI1	23	48	37	39	55	61	3	43	32	62	28	62	73	38	28	26	62	25
ENSG00000037897	METTL1	9	35	25	7	27	27	17	15	21	10	24	31	21	32	30	19	62	6
ENSG00000037965	HOXC8	0	0	0	0	0	0	0	0	0	0	0	0	0	0	0	0	0	0
ENSG00000038002	AGA	32	64	46	53	128	85	19	65	73	86	49	27	21	56	1	48	92	25
ENSG00000038210	PI4K2B	3	4	5	10	19	8	1	12	5	48	14	6	2	18	9	20	2	8
ENSG00000038219	BOD1L1	1557	1141	1519	1393	1955	1830	470	1363	675	208	1954	900	780	295	808	496	889	891
ENSG00000038274	MAT2B	15	52	88	46	154	71	12	52	48	126	27	54	13	54	9	58	80	11
ENSG00000038295	TLL1	0	0	0	0	0	0	0	0	2	0	0	0	0	0	0	0	0	2
ENSG00000038358	EDC4	0	0	0	0	0	1	0	0	0	0	0	0	2	1	0	0	1	0
ENSG00000038382	TRIO	350	284	197	199	284	286	166	218	305	63	122	61	172	105	285	114	104	74
ENSG00000038427	VCAN	398	58	131	11	518	74	22	137	328	20	12	62	5	267	2	162	155	2
ENSG00000038532	CLEC16A	51	52	43	60	106	68	29	63	54	65	18	29	24	33	16	31	39	14
ENSG00000038945	MSR1	6	0	3	0	3	1	1	1	2	27	8	2	45	10	1	6	12	7
ENSG00000039068	CDH1	2	0	0	2	1	0	0	0	0	5	0	6	0	2	0	2	1	0
ENSG00000039123	SKIV2L2	339	252	317	190	334	376	118	347	206	59	390	198	337	78	266	135	248	116
ENSG00000039139	DNAH5	0	0	0	0	0	0	0	0	0	0	0	0	0	0	0	0	0	0
ENSG00000039319	ZFYVE16	65	43	35	36	51	65	22	65	21	47	71	42	52	38	48	52	46	45
ENSG00000039523	FAM65A	60	147	106	153	236	201	76	225	170	274	130	106	77	79	136	65	37	42
ENSG00000039537	C6	0	0	0	0	0	0	0	0	0	0	0	0	0	0	0	0	0	0
ENSG00000039560	RAI14	3	2	0	0	5	6	0	1	4	39	23	61	4	23	17	82	3	40
ENSG00000039600	SOX30	0	0	0	0	0	2	0	0	0	0	0	0	0	0	0	0	0	0
ENSG00000039650	PNKP	67	96	121	64	116	116	26	80	76	47	50	36	124	69	55	52	89	28
ENSG00000039987	BEST2	1	0	0	0	0	0	0	0	0	0	0	0	0	0	1	0	0	0
ENSG00000040199	PHLPP2	19	15	33	11	28	17	5	23	11	11	18	3	12	4	9	8	5	4
ENSG00000040275	SPDL1	14	7	14	9	45	36	7	19	14	38	27	55	37	11	13	20	36	12
ENSG00000040341	STAU2	170	249	172	111	316	219	134	223	257	44	45	176	74	155	18	129	277	21
ENSG00000040487	PQLC2	10	21	12	8	32	15	9	15	4	16	6	15	9	18	2	12	5	3
ENSG00000040531	CTNS	8	12	20	24	40	13	6	32	17	41	5	13	23	12	21	24	6	5
ENSG00000040608	RTN4R	0	0	1	0	3	0	3	2	0	51	12	4	38	11	2	14	8	3
ENSG00000040633	PHF23	41	66	39	12	77	51	55	54	55	73	10	43	39	46	23	21	29	32
ENSG00000040731	CDH10	0	0	0	0	0	0	0	0	0	0	0	0	0	0	0	0	0	0
ENSG00000040933	INPP4A	31	26	33	26	60	28	11	21	41	65	12	32	18	39	6	39	40	11
ENSG00000041353	RAB27B	15	3	5	2	11	2	5	10	0	6	1	0	0	2	7	1	0	0
ENSG00000041357	PSMA4	95	178	216	124	378	235	80	146	100	175	464	293	237	423	222	267	484	256
ENSG00000041515	MYO16	0	0	0	0	0	0	0	0	0	0	0	0	0	0	0	0	0	0
ENSG00000041802	LSG1	148	156	176	92	235	196	75	176	143	92	328	201	217	127	247	150	172	56
ENSG00000041880	PARP3	12	12	8	8	26	7	9	19	26	17	14	3	21	13	3	23	24	10
ENSG00000041982	TNC	0	0	0	0	0	0	0	0	0	0	0	0	0	0	0	0	1	0
ENSG00000041988	THAP3	17	80	47	21	65	50	13	37	47	50	31	53	26	55	23	59	62	10
ENSG00000042062	FAM65C	4	0	3	3	12	1	7	2	1	37	4	9	3	2	0	5	0	0
ENSG00000042088	TDP1	27	33	22	31	70	26	17	28	44	70	55	52	30	31	21	33	39	33
ENSG00000042286	AIFM2	6	16	10	11	21	9	0	6	6	14	3	6	7	7	2	6	9	0
ENSG00000042304	C2orf83	0	0	0	0	0	0	0	0	0	0	0	0	0	0	0	0	0	0
ENSG00000042317	SPATA7	3	2	1	2	5	0	2	4	2	2	11	17	18	14	5	8	12	5
ENSG00000042429	MED17	166	91	98	167	166	146	64	71	72	78	175	97	212	47	93	65	157	44
ENSG00000042445	RETSAT	19	36	23	32	71	29	8	47	41	59	64	44	43	51	17	57	138	18
ENSG00000042493	CAPG	298	811	369	338	1713	630	496	429	540	207	419	430	226	1254	54	348	1207	153
ENSG00000042753	AP2S1	103	230	190	87	347	224	131	157	172	96	155	217	105	421	46	180	364	29
ENSG00000042781	USH2A	0	0	0	0	0	0	0	0	0	0	0	0	0	0	0	0	0	1
ENSG00000042813	ZPBP	0	0	0	0	0	0	0	0	0	0	0	0	0	0	0	0	0	0
ENSG00000042832	TG	1	0	0	2	2	0	1	0	3	4	3	11	10	0	1	8	8	2
ENSG00000042980	ADAM28	397	344	398	235	390	447	179	298	199	6	47	13	6	53	9	8	19	24
ENSG00000043039	BARX2	0	0	0	0	0	0	0	0	0	0	0	0	0	0	0	0	0	0
ENSG00000043093	DCUN1D1	19	6	15	10	25	9	3	19	12	54	48	26	23	27	22	23	37	9
ENSG00000043143	JADE2	105	174	178	125	287	143	205	164	236	89	60	105	171	197	24	169	83	31
ENSG00000043355	ZIC2	0	0	0	0	0	0	0	0	0	0	0	0	1	0	0	0	0	0
ENSG00000043462	LCP2	40	18	36	5	84	19	9	47	46	108	39	76	45	170	23	91	104	18
ENSG00000043514	TRIT1	16	21	17	28	53	33	7	21	9	38	35	35	17	28	20	27	39	11
ENSG00000043591	ADRB1	1	3	1	0	7	2	2	0	6	0	0	3	6	0	16	8	2	4
ENSG00000044012	GUCA2B	0	0	0	0	0	0	0	0	0	0	0	0	0	0	0	0	0	0
ENSG00000044090	CUL7	6	6	14	3	15	7	1	3	16	13	3	5	5	8	2	11	22	3
ENSG00000044115	CTNNA1	15	9	17	18	40	15	10	36	44	90	53	63	86	20	59	28	123	41
ENSG00000044446	PHKA2	56	85	76	75	127	99	36	86	101	104	149	86	54	74	27	59	73	37
ENSG00000044459	CNTLN	15	10	20	7	24	16	8	11	15	36	83	151	63	109	49	155	227	122
ENSG00000044524	EPHA3	0	0	0	0	0	0	0	0	0	0	0	0	0	0	0	0	0	0
ENSG00000044574	HSPA5	890	1076	593	1037	1242	683	582	1015	1136	497	1310	1100	313	665	1159	636	1633	443
ENSG00000046604	DSG2	1	3	2	1	1	0	0	0	1	52	0	28	0	0	0	0	0	0
ENSG00000046647	GEMIN8	12	33	17	8	42	24	7	26	15	16	33	21	8	15	6	27	25	11
ENSG00000046651	OFD1	504	504	492	425	808	702	265	586	327	193	1322	894	839	228	392	317	662	246
ENSG00000046653	GPM6B	0	0	0	0	0	0	0	0	0	0	83	178	239	0	2	2	7	15
ENSG00000046774	MAGEC2	0	0	0	0	0	0	0	0	0	0	0	0	0	0	0	0	0	0
ENSG00000046889	PREX2	0	0	0	0	0	0	0	1	0	0	0	1	0	0	37	1	0	0
ENSG00000047056	WDR37	32	26	30	18	35	31	9	16	14	23	41	19	20	15	27	20	25	12
ENSG00000047188	YTHDC2	66	50	57	80	117	98	24	79	29	70	94	24	47	34	35	44	42	19
ENSG00000047230	CTPS2	6	8	23	19	11	5	8	15	0	1	26	37	15	19	5	26	34	9
ENSG00000047249	ATP6V1H	38	21	39	30	48	36	16	24	49	64	77	68	43	46	31	30	49	25
ENSG00000047315	POLR2B	94	57	99	134	159	116	41	108	61	220	257	134	106	67	190	98	97	92
ENSG00000047346	FAM214A	231	178	155	221	275	300	78	181	133	122	131	60	35	27	120	84	59	58
ENSG00000047365	ARAP2	221	168	141	122	233	206	93	136	114	85	421	186	231	79	144	122	266	438
ENSG00000047410	TPR	633	438	530	407	802	869	228	580	298	141	859	475	546	195	783	322	525	485
ENSG00000047457	CP	0	0	0	0	1	0	0	0	0	0	0	1	0	1	1	1	0	0
ENSG00000047578	KIAA0556	13	4	8	20	18	15	1	10	2	22	15	6	14	10	11	13	10	6
ENSG00000047579	DTNBP1	132	141	132	164	248	173	71	202	226	336	205	257	100	125	219	117	121	128
ENSG00000047597	XK	4	0	1	1	6	0	1	1	1	14	4	7	0	1	0	3	0	0
ENSG00000047617	ANO2	0	0	0	0	0	0	0	0	0	0	0	0	1	0	0	0	0	0
ENSG00000047621	C12orf4	36	44	42	20	62	73	15	24	42	33	68	28	38	25	31	18	52	13
ENSG00000047634	SCML1	19	4	7	14	17	7	6	18	3	6	62	26	2	2	4	4	0	25
ENSG00000047644	WWC3	336	165	213	190	275	277	70	215	240	82	662	76	34	21	34	70	86	33
ENSG00000047648	ARHGAP6	20	5	3	1	13	7	4	5	0	0	0	4	0	0	11	0	0	0
ENSG00000047662	FAM184B	0	0	0	0	0	0	0	0	0	0	0	0	1	1	0	0	0	0
ENSG00000047849	MAP4	266	246	220	200	489	308	165	288	254	117	215	148	232	247	93	136	569	128
ENSG00000047932	GOPC	91	171	180	184	288	187	61	198	88	171	92	214	79	123	45	125	147	69
ENSG00000047936	ROS1	0	0	0	0	0	0	0	0	0	0	0	0	0	0	0	0	0	0
ENSG00000048028	USP28	172	189	229	203	425	310	117	208	146	94	93	85	73	65	13	33	52	48
ENSG00000048052	HDAC9	125	154	185	193	297	199	55	161	145	22	68	37	26	87	36	44	212	8
ENSG00000048140	TSPAN17	30	32	38	28	89	51	44	45	29	28	40	39	33	27	3	35	64	8
ENSG00000048162	NOP16	13	41	25	26	53	35	19	37	19	26	52	54	35	41	28	39	101	12
ENSG00000048342	CC2D2A	0	0	0	0	3	1	0	0	0	0	6	0	3	1	2	0	10	0
ENSG00000048392	RRM2B	37	21	34	20	49	56	20	41	20	35	24	25	16	16	49	32	24	7
ENSG00000048405	ZNF800	163	222	228	94	323	242	134	208	90	40	240	126	126	68	200	100	207	56
ENSG00000048462	TNFRSF17	2	0	2	0	6	3	0	6	3	2	0	0	0	1	0	2	0	0
ENSG00000048471	SNX29	264	131	190	147	304	260	101	114	221	45	44	45	58	44	33	44	28	16
ENSG00000048540	LMO3	0	0	0	0	0	0	0	0	3	0	0	0	0	0	0	0	0	0
ENSG00000048544	MRPS10	33	34	85	50	154	70	22	55	61	99	107	170	90	87	54	59	186	83
ENSG00000048545	GUCA1A	0	0	0	0	0	0	0	0	0	0	0	0	0	0	0	0	0	0
ENSG00000048649	RSF1	895	499	828	520	842	846	381	756	460	117	929	490	566	301	897	394	494	412
ENSG00000048707	VPS13D	221	106	135	111	220	223	82	105	128	110	100	73	102	47	47	88	119	56
ENSG00000048740	CELF2	1014	1136	1502	935	1924	1235	947	853	656	398	1031	1115	1387	985	430	1363	1825	544
ENSG00000048828	FAM120A	640	839	873	989	1432	1079	241	924	831	616	651	712	536	773	183	829	1166	167
ENSG00000048991	R3HDM1	68	62	95	87	94	82	13	64	63	52	113	124	98	65	52	70	107	66
ENSG00000049089	COL9A2	9	16	23	15	25	11	10	11	18	1	6	2	0	36	2	9	7	5
ENSG00000049130	KITLG	2	0	0	0	0	0	0	0	0	0	0	0	0	0	0	0	0	0
ENSG00000049167	ERCC8	10	9	22	9	23	12	1	17	11	11	15	13	15	14	2	16	17	4
ENSG00000049192	ADAMTS6	23	27	14	12	16	23	10	8	38	4	8	19	49	1	0	1	26	7
ENSG00000049239	H6PD	105	204	171	136	302	173	174	152	106	162	80	79	52	202	8	223	93	16
ENSG00000049245	VAMP3	29	50	58	29	77	43	33	46	30	50	125	72	49	101	48	67	105	19
ENSG00000049246	PER3	6	1	3	3	0	4	0	4	0	5	4	1	7	4	0	0	2	1
ENSG00000049247	UTS2	0	0	0	0	0	0	0	0	0	0	0	1	0	0	0	1	0	5
ENSG00000049249	TNFRSF9	2	0	0	0	2	3	1	3	3	1	14	2	1	0	1	3	2	5
ENSG00000049283	EPN3	0	0	0	0	0	0	0	0	0	0	0	0	0	0	0	0	0	0
ENSG00000049323	LTBP1	32	6	5	3	36	8	14	18	2	4	4	12	1	1	2	1	0	0
ENSG00000049449	RCN1	2	5	7	3	5	6	2	8	5	38	40	29	21	13	29	46	42	6
ENSG00000049540	ELN	0	1	1	0	2	0	3	6	0	1	0	0	0	0	0	0	0	0
ENSG00000049541	RFC2	7	29	30	16	63	34	16	29	16	46	43	90	26	52	39	37	129	23
ENSG00000049618	ARID1B	486	344	439	519	708	407	305	372	384	242	228	328	364	214	83	280	380	178
ENSG00000049656	CLPTM1L	83	91	109	176	222	127	28	160	126	266	292	179	151	152	82	144	198	60
ENSG00000049759	NEDD4L	8	6	8	15	14	9	5	15	22	53	15	36	0	0	30	7	0	16
ENSG00000049768	FOXP3	1	0	3	1	2	0	0	0	0	8	1	0	0	1	0	0	0	0
ENSG00000049769	PPP1R3F	5	3	3	3	16	3	2	9	1	21	16	8	4	3	3	3	2	3
ENSG00000049860	HEXB	21	11	26	39	63	22	4	32	35	194	152	135	25	88	173	50	68	34
ENSG00000049883	PTCD2	8	17	18	17	45	16	1	19	16	11	9	24	17	24	3	28	28	2
ENSG00000050030	KIAA2022	0	0	0	0	0	0	0	0	0	1	0	0	0	0	0	0	0	0
ENSG00000050130	JKAMP	4	6	11	13	17	8	2	5	5	35	15	11	6	14	2	8	10	3
ENSG00000050165	DKK3	0	0	0	0	0	0	0	0	0	0	0	0	3	0	0	0	0	0
ENSG00000050327	ARHGEF5	8	32	23	8	34	21	17	19	18	6	16	10	0	4	1	3	6	2
ENSG00000050344	NFE2L3	0	2	2	0	1	1	2	1	6	0	0	1	0	3	0	1	0	0
ENSG00000050393	MCUR1	26	27	25	22	47	35	18	39	46	58	60	31	34	38	33	20	47	23
ENSG00000050405	LIMA1	3	0	2	0	9	2	2	3	7	2	2	9	16	20	17	8	0	0
ENSG00000050426	LETMD1	52	65	49	65	99	77	30	59	70	65	22	44	82	63	48	76	96	15
ENSG00000050438	SLC4A8	19	10	15	10	50	22	13	10	22	6	33	25	20	39	20	13	17	7
ENSG00000050555	LAMC3	1	3	0	0	1	2	1	1	0	0	0	2	2	0	0	0	0	0
ENSG00000050628	PTGER3	0	0	1	0	1	0	0	0	0	0	0	1	0	0	0	0	0	0
ENSG00000050730	TNIP3	0	0	1	0	1	1	0	0	0	4	1	1	1	0	0	0	1	0
ENSG00000050748	MAPK9	25	35	19	42	35	28	17	25	35	38	35	21	46	15	13	24	34	26
ENSG00000050767	COL23A1	0	0	1	0	2	0	0	0	0	1	0	1	0	85	0	63	18	0
ENSG00000050820	BCAR1	0	0	0	0	0	0	0	0	0	0	0	0	0	0	0	0	0	0
ENSG00000051009	FAM160A2	13	44	23	33	111	31	7	40	31	83	58	37	30	67	10	55	43	17
ENSG00000051108	HERPUD1	405	608	535	523	406	427	590	779	483	78	146	26	196	101	254	65	188	92
ENSG00000051128	HOMER3	1	2	5	0	19	1	2	13	16	32	21	16	66	60	3	16	2	6
ENSG00000051180	RAD51	0	1	4	0	2	3	2	0	0	69	36	37	4	23	7	17	62	2
ENSG00000051341	POLQ	0	1	1	0	1	2	0	0	2	21	56	32	5	13	13	13	40	4
ENSG00000051382	PIK3CB	13	13	22	11	24	12	25	17	7	26	10	13	15	77	4	19	14	8
ENSG00000051523	CYBA	259	409	309	202	613	394	234	281	326	90	119	95	186	310	37	141	398	33
ENSG00000051596	THOC3	9	1	5	8	3	2	0	1	0	71	18	7	12	0	17	5	5	5
ENSG00000051620	HEBP2	251	213	140	100	189	279	94	229	267	98	288	74	97	108	170	121	223	119
ENSG00000051825	MPHOSPH9	156	172	179	174	259	210	124	166	75	143	171	303	255	222	88	251	341	77
ENSG00000052126	PLEKHA5	7	2	7	3	6	6	7	5	3	17	62	71	0	76	14	93	59	58
ENSG00000052344	PRSS8	0	0	2	0	0	0	0	0	0	0	0	0	0	0	0	0	0	0
ENSG00000052723	SIKE1	25	24	15	18	45	41	11	40	24	17	20	26	10	9	28	12	23	15
ENSG00000052749	RRP12	34	80	57	31	128	76	74	37	56	19	29	40	55	37	157	37	139	16
ENSG00000052795	FNIP2	6	6	1	2	21	1	7	5	20	26	81	58	20	51	51	69	112	22
ENSG00000052802	MSMO1	8	13	31	5	38	8	26	12	9	31	12	13	3	39	4	14	58	6
ENSG00000052841	TTC17	237	264	302	265	560	389	112	355	234	210	157	215	114	183	37	245	300	59
ENSG00000052850	ALX4	0	0	0	0	0	0	0	0	0	0	0	0	0	0	0	0	0	0
ENSG00000053108	FSTL4	0	0	0	1	0	1	0	2	1	0	1	0	0	0	17	0	1	2
ENSG00000053254	FOXN3	639	565	932	1078	979	676	358	849	747	585	693	693	832	401	242	670	981	496
ENSG00000053328	METTL24	0	0	0	0	0	0	0	0	0	0	0	0	0	0	0	0	0	0
ENSG00000053371	AKR7A2	44	69	69	66	138	61	35	85	87	84	77	55	49	125	9	102	91	15
ENSG00000053372	MRTO4	28	89	115	41	130	95	38	65	71	26	62	99	86	80	33	60	192	29
ENSG00000053438	NNAT	0	0	0	0	2	0	0	0	0	0	0	0	0	0	0	0	0	0
ENSG00000053501	USE1	23	31	37	50	101	33	17	67	60	36	12	32	54	35	41	38	58	16
ENSG00000053524	MCF2L2	1	0	0	0	3	0	0	0	0	2	5	0	27	3	8	5	0	0
ENSG00000053702	NRIP2	0	0	0	0	0	0	0	0	0	0	0	0	0	0	0	0	0	0
ENSG00000053747	LAMA3	0	0	0	0	0	0	0	0	0	0	5	0	0	5	2	10	0	0
ENSG00000053770	AP5M1	42	49	54	45	107	61	22	50	24	49	41	61	39	61	34	52	53	32
ENSG00000053900	ANAPC4	53	41	71	64	78	69	13	54	34	75	47	71	40	44	11	42	70	32
ENSG00000053918	KCNQ1	50	42	58	34	83	49	49	43	70	56	29	13	7	40	3	10	3	13
ENSG00000054116	TRAPPC3	62	139	116	166	303	156	31	192	155	195	127	151	87	140	42	128	243	23
ENSG00000054118	THRAP3	609	540	729	540	839	852	198	811	536	239	657	411	465	246	258	315	507	334
ENSG00000054148	PHPT1	27	59	66	65	105	57	56	54	50	60	92	77	86	189	24	125	198	16
ENSG00000054179	ENTPD2	0	0	0	0	0	0	0	0	0	0	0	0	0	0	0	0	0	0
ENSG00000054219	LY75	27	29	57	25	109	62	14	28	22	43	13	28	26	75	3	34	101	8
ENSG00000054267	ARID4B	975	674	1061	813	1186	1089	599	930	632	123	1570	490	1045	372	1732	576	469	330
ENSG00000054277	OPN3	98	170	178	203	299	158	34	180	246	105	86	26	43	30	34	28	74	17
ENSG00000054282	SDCCAG8	208	174	267	118	279	244	82	167	140	130	107	227	250	286	71	418	447	103
ENSG00000054356	PTPRN	5	0	1	1	3	0	1	1	0	0	0	0	0	0	0	0	2	0
ENSG00000054392	HHAT	30	30	29	30	30	32	12	25	13	77	46	27	50	28	7	46	84	10
ENSG00000054523	KIF1B	44	26	20	18	57	34	16	35	45	5	30	47	103	81	10	62	19	16
ENSG00000054598	FOXC1	2	2	1	3	0	2	2	6	2	0	0	10	1	0	2	3	1	0
ENSG00000054611	TBC1D22A	410	467	368	168	735	612	386	332	531	96	50	113	91	212	35	111	233	39
ENSG00000054654	SYNE2	572	375	536	283	451	702	193	506	288	113	818	128	157	134	164	362	75	341
ENSG00000054690	PLEKHH1	0	0	0	0	0	3	1	0	0	0	0	0	0	2	0	0	0	0
ENSG00000054793	ATP9A	13	10	5	3	14	8	2	10	4	80	17	17	520	25	17	39	26	6
ENSG00000054796	SPO11	0	0	0	0	0	0	0	0	0	0	0	0	0	0	0	0	0	0
ENSG00000054803	CBLN4	0	0	0	0	0	0	0	0	0	0	0	0	0	0	0	0	0	0
ENSG00000054938	CHRDL2	0	0	0	0	0	0	0	0	0	0	0	0	0	0	0	0	0	0
ENSG00000054965	FAM168A	8	8	7	7	13	11	9	8	13	12	13	12	29	21	7	24	29	8
ENSG00000054967	RELT	131	221	189	204	334	218	231	170	180	188	122	38	129	111	153	48	261	31
ENSG00000054983	GALC	23	23	25	31	47	25	10	24	21	63	143	118	15	37	37	36	64	33
ENSG00000055044	NOP58	388	214	400	304	325	257	175	328	167	218	709	211	340	136	1923	187	368	194
ENSG00000055070	SZRD1	146	166	146	147	278	183	119	196	206	222	294	146	143	146	157	125	321	54
ENSG00000055118	KCNH2	1	0	1	1	3	2	0	7	0	18	7	49	1	6	1	20	2	0
ENSG00000055130	CUL1	79	85	73	97	121	107	36	95	75	183	71	86	96	163	110	85	133	31
ENSG00000055147	FAM114A2	24	40	40	21	47	35	12	40	24	29	3	33	27	44	1	67	51	8
ENSG00000055163	CYFIP2	1265	2000	1678	1130	2864	1745	1112	1277	1460	747	456	439	337	346	208	375	426	160
ENSG00000055208	TAB2	48	40	59	60	100	85	35	57	69	105	90	55	49	69	91	86	47	34
ENSG00000055211	GINM1	117	78	86	95	119	97	61	92	74	39	154	178	83	56	159	94	77	118
ENSG00000055332	EIF2AK2	138	68	110	129	248	194	40	119	98	77	390	197	328	751	755	168	198	127
ENSG00000055483	USP36	519	181	260	158	297	274	649	246	278	83	610	392	1962	126	3820	145	426	295
ENSG00000055609	KMT2C	1111	653	834	673	1041	1036	495	808	616	139	1505	560	1099	376	1521	398	659	612
ENSG00000055732	MCOLN3	1	0	0	0	0	0	0	0	0	0	0	0	0	0	0	0	0	0
ENSG00000055813	CCDC85A	0	0	0	0	1	0	0	0	0	0	0	0	0	0	0	0	0	0
ENSG00000055917	PUM2	119	54	88	117	199	151	47	132	84	277	151	141	115	92	139	125	166	48
ENSG00000055950	MRPL43	46	86	79	77	178	85	29	108	106	114	68	128	62	116	15	113	140	45
ENSG00000055955	ITIH4	9	18	22	15	29	23	26	4	10	22	26	37	9	26	7	24	22	8
ENSG00000055957	ITIH1	0	0	0	1	6	2	1	0	0	0	1	0	0	0	0	0	0	1
ENSG00000056050	C4orf27	2	19	12	14	36	13	0	11	16	90	19	73	13	28	11	28	37	15
ENSG00000056097	ZFR	419	301	305	240	499	487	133	357	393	37	726	276	352	94	419	176	391	175
ENSG00000056277	ZNF280C	11	7	12	6	13	17	3	8	7	8	27	15	8	2	6	7	12	16
ENSG00000056291	NPFFR2	0	0	1	0	0	0	0	0	0	0	0	0	0	0	0	0	0	0
ENSG00000056487	PHF21B	0	0	0	0	0	0	0	0	0	1	0	0	0	0	0	0	0	0
ENSG00000056558	TRAF1	28	47	32	11	52	21	39	14	29	19	33	5	8	24	12	14	15	2
ENSG00000056586	RC3H2	250	285	231	205	411	301	221	270	216	169	206	169	163	160	51	201	219	70
ENSG00000056736	IL17RB	0	0	0	0	0	0	0	0	0	0	0	0	0	0	0	0	0	0
ENSG00000056972	TRAF3IP2	9	20	19	19	20	19	9	9	13	407	118	160	123	40	134	138	87	32
ENSG00000056998	GYG2	0	0	0	0	1	0	0	0	0	2	0	0	0	0	0	0	0	0
ENSG00000057019	DCBLD2	3	5	0	2	4	2	0	5	1	43	5	12	5	0	4	1	2	6
ENSG00000057149	SERPINB3	0	0	0	0	0	0	0	0	0	0	0	0	0	0	0	0	0	0
ENSG00000057252	SOAT1	21	20	22	12	61	19	36	30	17	56	22	51	21	58	8	40	56	2
ENSG00000057294	PKP2	1	0	0	0	0	0	0	1	0	0	2	0	0	0	0	0	0	1
ENSG00000057468	MSH4	0	0	0	0	0	1	0	0	0	0	0	1	0	1	0	1	1	0
ENSG00000057593	F7	0	0	0	0	0	0	0	0	0	0	0	0	1	0	0	0	0	0
ENSG00000057608	GDI2	176	444	404	461	845	433	133	545	461	579	695	596	333	693	377	582	1072	352
ENSG00000057657	PRDM1	17	11	20	3	8	2	29	2	27	13	16	6	8	7	9	30	45	5
ENSG00000057663	ATG5	15	28	30	34	46	44	11	41	23	45	34	29	17	16	28	28	34	15
ENSG00000057704	TMCC3	57	44	27	29	76	47	39	33	60	0	7	0	76	14	452	2	1	6
ENSG00000057757	PITHD1	32	47	72	47	97	59	19	67	52	69	64	52	31	45	87	47	57	12
ENSG00000057935	MTA3	10	11	11	9	27	20	2	19	13	32	14	14	32	11	13	18	19	18
ENSG00000058056	USP13	29	43	60	42	56	37	21	51	29	59	30	64	20	20	2	29	88	12
ENSG00000058063	ATP11B	68	22	48	39	59	63	23	59	43	28	97	32	52	20	65	31	35	29
ENSG00000058085	LAMC2	0	0	1	0	0	1	0	0	0	0	0	0	0	0	0	0	0	0
ENSG00000058091	CDK14	165	106	115	81	187	172	68	88	141	56	118	56	27	15	55	14	94	40
ENSG00000058262	SEC61A1	60	150	108	42	187	104	45	82	84	108	168	127	85	133	85	120	249	38
ENSG00000058272	PPP1R12A	774	657	995	761	1083	923	345	860	538	292	1209	504	631	404	1130	565	628	391
ENSG00000058335	RASGRF1	1	0	0	1	4	2	0	1	3	0	0	0	0	2	0	0	0	0
ENSG00000058404	CAMK2B	0	0	0	0	0	0	0	0	0	0	0	0	0	2	0	0	0	0
ENSG00000058453	CROCC	11	30	22	26	49	15	9	40	30	32	23	30	31	19	11	15	51	13
ENSG00000058600	POLR3E	65	54	39	41	71	37	41	57	40	44	61	43	43	30	31	37	62	19
ENSG00000058668	ATP2B4	12	32	39	23	49	27	14	40	23	200	134	311	235	240	69	152	231	81
ENSG00000058673	ZC3H11A	272	183	197	217	338	303	107	217	213	158	310	144	179	91	379	97	129	129
ENSG00000058729	RIOK2	12	2	18	13	24	10	3	13	4	30	38	27	14	10	26	10	36	15
ENSG00000058799	YIPF1	14	38	31	29	64	47	5	41	13	85	32	32	26	57	8	41	52	14
ENSG00000058804	NDC1	16	18	22	22	53	32	8	27	17	78	6	42	25	27	6	53	63	11
ENSG00000058866	DGKG	4	2	6	2	8	2	6	8	12	1	1	2	2	12	0	11	2	0
ENSG00000059122	FLYWCH1	32	67	35	26	122	58	39	33	42	49	26	42	42	21	7	17	73	18
ENSG00000059145	UNKL	38	29	37	40	64	41	10	32	21	57	32	23	48	17	18	26	15	12
ENSG00000059377	TBXAS1	18	8	14	3	62	10	14	19	24	15	21	12	33	149	12	141	165	14
ENSG00000059378	PARP12	91	112	101	122	193	156	29	113	58	91	65	42	46	175	51	31	32	14
ENSG00000059573	ALDH18A1	6	6	12	19	25	8	0	5	14	47	11	14	22	16	3	17	20	2
ENSG00000059588	TARBP1	84	58	68	47	81	71	22	58	27	105	49	94	213	173	60	139	70	36
ENSG00000059691	GATB	16	26	20	27	31	23	10	26	14	19	7	37	25	15	3	24	32	14
ENSG00000059728	MXD1	61	18	24	23	47	31	20	40	65	13	32	6	12	6	267	18	11	4
ENSG00000059758	CDK17	43	26	14	35	61	45	9	38	33	42	92	16	60	14	135	24	31	21
ENSG00000059769	DNAJC25	20	27	20	14	23	33	5	33	23	7	71	14	33	9	76	16	25	8
ENSG00000059804	SLC2A3	1251	1332	931	1644	1309	1709	938	1571	1405	109	469	420	646	61	2560	137	634	267
ENSG00000059915	PSD	2	1	0	0	2	1	0	0	0	0	0	5	0	0	0	0	0	0
ENSG00000060069	CTDP1	20	25	31	30	56	42	19	33	47	62	43	49	26	47	51	49	45	44
ENSG00000060138	YBX3	1026	578	951	757	521	534	293	630	1493	721	1261	518	1298	289	1837	1308	714	923
ENSG00000060140	STYK1	0	0	0	0	0	0	0	0	0	1	1	8	8	2	0	15	41	3
ENSG00000060237	WNK1	402	318	437	307	585	461	247	331	406	219	323	317	366	306	628	328	422	148
ENSG00000060339	CCAR1	635	414	716	522	715	662	212	569	398	296	838	617	758	280	516	447	529	664
ENSG00000060491	OGFR	225	160	147	86	285	208	102	182	153	133	115	97	174	234	56	130	237	52
ENSG00000060558	GNA15	11	0	4	1	15	2	30	9	14	132	424	203	547	122	1122	415	375	194
ENSG00000060566	CREB3L3	0	0	0	0	0	0	0	0	0	8	1	1	6	0	0	0	1	0
ENSG00000060642	PIGV	0	5	12	0	17	5	1	5	9	29	5	16	13	25	2	33	15	1
ENSG00000060656	PTPRU	0	0	0	0	0	0	3	0	0	0	0	0	0	0	1	1	0	0
ENSG00000060688	SNRNP40	4	13	5	7	20	13	3	5	20	14	22	7	15	10	4	19	19	6
ENSG00000060709	RIMBP2	82	0	0	10	0	46	2	66	0	0	0	0	0	0	0	0	0	0
ENSG00000060718	COL11A1	0	0	0	0	0	0	0	0	0	0	0	0	0	0	0	0	1	0
ENSG00000060749	QSER1	60	64	45	31	98	87	46	75	28	31	82	57	37	43	61	63	116	41
ENSG00000060762	MPC1	108	36	60	57	51	62	35	66	65	11	114	41	65	32	70	48	41	29
ENSG00000060971	ACAA1	64	123	101	116	201	154	66	126	140	153	123	74	109	180	71	73	146	35
ENSG00000060982	BCAT1	11	4	8	6	20	10	4	5	0	12	66	65	41	92	76	116	212	19
ENSG00000061273	HDAC7	557	925	652	782	790	923	504	274	1108	3471	2424	1525	915	979	601	1460	1582	679
ENSG00000061337	LZTS1	0	0	0	0	3	0	0	0	0	0	0	0	0	0	0	0	0	0
ENSG00000061455	PRDM6	0	0	0	0	0	0	0	0	0	0	0	0	1	0	1	0	0	0
ENSG00000061492	WNT8A	0	0	0	0	0	0	0	0	0	0	0	0	0	1	0	0	0	0
ENSG00000061656	SPAG4	6	1	2	1	1	1	18	1	1	0	5	1	5	1	3	1	3	2
ENSG00000061676	NCKAP1	0	0	1	0	7	2	0	2	0	2	1	0	0	2	0	3	2	0
ENSG00000061794	MRPS35	18	45	45	36	100	79	4	40	39	41	124	51	62	41	79	58	144	40
ENSG00000061918	GUCY1B3	12	0	2	3	10	4	6	1	1	20	9	9	42	4	7	1	1	0
ENSG00000061936	SFSWAP	591	412	407	291	676	787	207	472	501	164	691	280	508	164	662	227	357	243
ENSG00000061938	TNK2	240	435	379	343	650	466	277	358	375	277	330	202	252	693	75	313	481	69
ENSG00000061987	MON2	46	47	43	66	94	74	19	61	35	68	63	26	50	38	47	45	35	13
ENSG00000062038	CDH3	0	0	0	0	0	0	0	0	0	1	0	0	1	0	0	0	0	0
ENSG00000062096	ARSF	0	0	0	0	0	0	0	0	0	0	0	0	0	0	0	0	0	0
ENSG00000062194	GPBP1	810	422	492	450	778	579	992	503	388	369	671	338	289	324	1061	314	410	238
ENSG00000062282	DGAT2	20	38	34	18	32	34	7	30	48	0	1	0	0	14	0	5	0	2
ENSG00000062370	ZNF112	0	0	0	0	2	1	0	0	0	0	0	1	0	2	4	0	1	0
ENSG00000062485	CS	94	116	103	108	253	109	77	129	79	133	200	113	107	106	167	127	254	39
ENSG00000062524	LTK	1	7	10	6	24	14	10	4	3	18	88	7	50	61	24	11	17	3
ENSG00000062582	MRPS24	2	2	1	2	0	2	0	0	0	2	1	4	3	2	0	5	7	3
ENSG00000062598	ELMO2	23	15	24	31	79	39	55	48	25	85	21	20	39	56	24	36	52	13
ENSG00000062650	WAPL	118	128	95	77	224	175	50	100	101	33	209	225	163	108	97	151	190	94
ENSG00000062716	VMP1	29	16	39	46	85	38	8	29	76	54	98	71	64	80	82	80	65	92
ENSG00000062725	APPBP2	35	48	69	50	125	74	37	57	54	75	50	72	57	47	34	52	45	27
ENSG00000062822	POLD1	9	23	18	16	23	28	12	17	9	57	51	36	30	22	20	28	53	7
ENSG00000063015	SEZ6	0	0	0	0	0	0	0	0	0	0	0	0	0	0	1	0	0	1
ENSG00000063046	EIF4B	124	77	78	145	144	113	26	75	265	103	245	70	133	37	225	61	116	76
ENSG00000063127	SLC6A16	26	60	50	55	80	47	21	53	31	30	22	26	1	7	1	3	19	0
ENSG00000063169	GLTSCR1	3	3	5	21	10	11	0	4	10	33	11	9	5	3	1	4	2	5
ENSG00000063176	SPHK2	27	64	41	38	91	43	31	53	44	46	9	25	20	31	25	31	62	9
ENSG00000063177	RPL18	4007	6210	5124	6056	9309	5617	2595	6786	10580	3920	4242	2988	2711	3141	5743	3919	7814	1796
ENSG00000063180	CA11	18	55	42	18	45	33	26	50	48	20	46	35	22	9	8	15	33	24
ENSG00000063241	ISOC2	22	29	35	14	56	47	4	15	23	12	9	34	21	38	5	12	24	5
ENSG00000063244	U2AF2	361	817	485	355	1240	723	598	636	475	637	402	652	386	448	384	547	1210	165
ENSG00000063245	EPN1	144	181	179	128	436	224	119	136	189	88	153	196	175	282	139	207	403	66
ENSG00000063322	MED29	60	80	68	43	119	95	37	76	81	41	40	43	54	59	52	28	55	26
ENSG00000063438	AHRR	0	1	1	0	0	0	0	1	2	4	3	0	2	2	0	0	0	0
ENSG00000063515	GSC2	0	0	0	0	0	0	0	0	0	0	0	0	0	0	0	0	0	0
ENSG00000063587	ZNF275	44	100	111	86	114	68	26	92	92	178	254	44	26	48	57	79	57	34
ENSG00000063601	MTMR1	113	139	115	141	259	169	70	157	122	76	146	105	18	66	32	48	54	33
ENSG00000063660	GPC1	1	4	2	2	3	2	5	2	2	2	0	3	0	1	1	0	0	0
ENSG00000063761	ADCK1	23	17	17	17	30	17	19	7	10	12	8	16	10	8	4	11	12	13
ENSG00000063854	HAGH	35	69	43	55	83	33	18	70	75	183	31	72	37	42	10	70	60	9
ENSG00000063978	RNF4	62	59	71	43	99	67	46	49	33	46	84	39	39	27	42	22	57	14
ENSG00000064012	CASP8	41	49	45	59	69	68	15	53	25	33	119	25	53	44	43	155	65	83
ENSG00000064042	LIMCH1	0	0	0	0	4	2	5	0	0	0	0	1	0	1	40	0	0	0
ENSG00000064102	ASUN	28	15	49	27	55	23	8	38	50	43	32	28	60	32	84	22	32	25
ENSG00000064115	TM7SF3	29	27	33	49	63	39	6	28	49	65	62	61	65	77	21	75	30	19
ENSG00000064195	DLX3	0	0	0	0	0	0	0	0	0	0	0	0	0	0	2	0	0	0
ENSG00000064199	SPA17	4	1	7	0	6	9	0	0	6	3	0	0	2	0	0	6	1	0
ENSG00000064201	TSPAN32	78	92	86	49	255	96	69	67	52	46	11	30	23	101	11	88	59	14
ENSG00000064205	WISP2	0	0	0	0	0	0	0	0	0	0	0	0	0	2	0	0	0	0
ENSG00000064218	DMRT3	0	0	0	0	0	0	0	0	0	0	0	0	0	0	0	0	0	0
ENSG00000064225	ST3GAL6	9	10	2	7	27	12	6	11	8	139	29	57	95	34	45	66	25	33
ENSG00000064270	ATP2C2	0	0	0	0	0	0	0	0	8	0	0	0	0	0	0	0	0	0
ENSG00000064300	NGFR	0	3	1	0	0	0	0	0	0	23	13	17	92	2	2	6	194	37
ENSG00000064309	CDON	0	0	0	0	0	2	0	0	0	1	3	1	0	0	0	0	0	0
ENSG00000064313	TAF2	143	87	160	83	136	149	50	131	104	36	138	145	142	38	158	71	78	77
ENSG00000064393	HIPK2	153	82	132	144	178	98	61	102	102	120	50	49	93	88	50	117	160	124
ENSG00000064419	TNPO3	225	170	247	236	284	280	78	215	198	182	188	141	178	120	82	164	210	49
ENSG00000064489	MEF2BNB-MEF2B	5	5	0	3	5	6	3	7	4	0	2	5	3	1	1	4	1	0
ENSG00000064490	RFXANK	23	59	40	40	80	37	19	51	67	60	45	42	39	63	23	37	64	15
ENSG00000064545	TMEM161A	48	111	89	33	134	89	59	65	79	63	28	83	100	62	22	46	183	30
ENSG00000064547	LPAR2	44	24	38	36	59	38	30	55	37	54	102	28	59	61	18	32	37	43
ENSG00000064601	CTSA	142	125	117	88	275	142	114	154	115	87	37	81	75	183	23	146	184	18
ENSG00000064607	SUGP2	279	381	405	346	687	426	231	320	239	661	474	412	398	414	157	358	707	192
ENSG00000064651	SLC12A2	64	92	109	144	189	105	46	112	49	149	168	147	50	59	45	61	337	46
ENSG00000064652	SNX24	6	5	2	5	5	3	5	2	5	1	6	5	1	1	3	1	0	2
ENSG00000064655	EYA2	0	0	0	0	0	0	0	0	0	0	0	1	0	0	0	0	0	0
ENSG00000064666	CNN2	734	1897	1348	1042	3506	1582	1526	1187	1217	650	212	124	152	1071	20	422	23	117
ENSG00000064687	ABCA7	149	294	196	196	423	286	113	184	212	104	52	42	28	109	4	35	11	9
ENSG00000064692	SNCAIP	0	0	0	0	0	0	0	0	0	1	0	0	0	0	0	0	0	0
ENSG00000064703	DDX20	78	42	55	48	78	65	42	33	29	17	58	49	65	14	87	20	82	33
ENSG00000064726	BTBD1	6	5	4	4	6	7	1	0	8	13	17	2	2	2	8	4	5	3
ENSG00000064763	FAR2	0	0	0	1	7	4	2	4	0	4	8	9	4	9	3	19	61	2
ENSG00000064787	BCAS1	0	0	3	0	5	0	1	0	2	5	3	0	5	0	2	0	0	1
ENSG00000064835	POU1F1	0	0	0	0	0	0	0	0	0	0	0	0	0	0	0	0	0	0
ENSG00000064886	CHI3L2	4	35	47	52	130	112	30	145	151	22	3	5	158	2	0	1	4	1
ENSG00000064932	SBNO2	24	59	43	33	97	37	34	57	37	67	42	70	32	81	103	49	57	20
ENSG00000064933	PMS1	28	38	33	35	67	47	8	37	13	66	24	31	28	32	18	47	114	14
ENSG00000064961	HMG20B	45	35	44	44	90	50	27	60	57	93	65	59	79	84	79	67	103	35
ENSG00000064989	CALCRL	0	3	3	4	4	1	1	7	0	0	0	0	0	4	0	7	0	0
ENSG00000064995	TAF11	196	301	235	206	449	332	129	326	173	179	471	367	181	213	402	262	385	193
ENSG00000064999	ANKS1A	44	26	21	27	50	38	23	45	34	20	17	44	47	33	26	50	54	33
ENSG00000065000	AP3D1	300	290	435	333	485	374	135	329	453	213	326	276	381	289	398	300	383	266
ENSG00000065029	ZNF76	79	118	130	142	171	128	85	113	112	174	55	105	84	60	37	55	61	39
ENSG00000065054	SLC9A3R2	0	2	0	2	4	0	1	2	2	15	18	132	34	91	3	71	479	34
ENSG00000065057	NTHL1	21	38	30	9	56	46	26	24	24	28	47	56	50	87	5	46	261	10
ENSG00000065060	UHRF1BP1	15	4	12	12	22	15	5	11	30	6	41	21	26	17	24	11	11	14
ENSG00000065135	GNAI3	73	111	104	93	278	132	90	139	60	159	235	201	243	198	666	174	301	78
ENSG00000065150	IPO5	57	65	81	58	130	80	32	53	72	85	158	80	88	65	125	84	196	57
ENSG00000065154	OAT	1	2	2	5	7	6	2	0	4	24	7	10	18	7	8	19	8	4
ENSG00000065183	WDR3	17	40	26	22	60	41	8	35	24	26	22	31	45	10	7	27	72	8
ENSG00000065243	PKN2	180	114	109	130	214	200	69	114	137	18	298	104	270	91	149	152	146	146
ENSG00000065268	WDR18	53	200	113	46	229	163	45	64	126	108	72	166	86	197	48	138	452	19
ENSG00000065308	TRAM2	7	14	13	14	20	15	5	12	19	15	37	27	23	14	7	66	26	9
ENSG00000065320	NTN1	1	3	0	0	1	0	0	0	0	2	2	1	2	4	2	4	0	2
ENSG00000065325	GLP2R	0	0	0	0	0	0	0	0	2	0	0	0	0	0	0	0	0	0
ENSG00000065328	MCM10	1	1	0	3	1	2	0	3	1	112	56	98	12	13	15	29	43	22
ENSG00000065357	DGKA	667	1078	1073	707	1427	716	593	893	561	1643	454	700	397	832	124	1091	415	254
ENSG00000065361	ERBB3	0	0	0	1	0	0	0	0	0	0	0	0	0	0	0	0	0	1
ENSG00000065371	ROPN1	0	0	0	0	0	0	0	0	0	0	0	0	0	0	0	0	0	0
ENSG00000065413	ANKRD44	726	648	795	508	793	649	447	581	417	101	104	97	111	186	43	213	122	34
ENSG00000065427	KARS	161	254	217	172	398	292	112	278	326	270	308	228	224	339	230	311	629	128
ENSG00000065457	ADAT1	43	61	71	46	60	52	12	45	55	78	45	39	34	32	17	38	40	21
ENSG00000065485	PDIA5	5	8	11	14	10	9	0	6	6	3	3	18	10	8	7	22	23	2
ENSG00000065491	TBC1D22B	34	29	22	24	38	36	19	20	27	85	49	43	28	25	7	26	39	31
ENSG00000065518	NDUFB4	84	88	106	96	240	132	57	122	87	262	251	169	113	128	63	137	228	80
ENSG00000065526	SPEN	407	378	410	297	625	541	331	430	385	139	701	254	404	123	327	140	372	143
ENSG00000065534	MYLK	15	6	11	9	23	4	8	25	2	63	72	4	134	78	162	183	24	17
ENSG00000065548	ZC3H15	1547	1613	1396	644	1393	1671	1570	1086	637	228	1244	1005	1082	682	1220	794	1561	413
ENSG00000065559	MAP2K4	38	38	34	35	48	50	32	42	32	31	17	41	33	14	19	26	31	17
ENSG00000065600	TMEM206	19	15	28	29	31	30	12	26	23	30	11	24	11	16	2	10	36	4
ENSG00000065609	SNAP91	0	0	0	0	0	0	0	0	0	0	0	1	0	0	0	0	1	0
ENSG00000065613	SLK	192	154	195	143	269	258	114	200	171	82	391	239	202	96	173	182	203	182
ENSG00000065615	CYB5R4	109	132	117	102	217	177	78	140	113	50	101	73	78	55	24	45	109	95
ENSG00000065618	COL17A1	0	0	0	0	1	0	0	0	0	0	0	0	0	0	0	0	0	0
ENSG00000065621	GSTO2	4	6	5	1	7	1	3	0	8	3	3	1	0	0	0	2	1	0
ENSG00000065665	SEC61A2	17	8	11	28	31	10	7	14	11	64	58	50	31	25	43	57	64	25
ENSG00000065675	PRKCQ	14	3	10	5	18	3	7	7	6	65	23	30	46	46	5	59	7	10
ENSG00000065717	TLE2	12	17	3	8	17	17	6	12	15	2	7	1	6	0	1	1	0	3
ENSG00000065802	ASB1	31	148	102	58	183	92	29	82	65	62	52	53	54	85	21	63	85	18
ENSG00000065809	FAM107B	492	355	478	434	603	691	314	511	581	354	920	137	185	114	482	104	217	326
ENSG00000065833	ME1	0	0	0	0	0	0	0	0	0	0	0	0	0	0	0	0	1	0
ENSG00000065882	TBC1D1	240	297	306	261	383	404	199	332	379	249	174	186	118	139	118	132	236	105
ENSG00000065883	CDK13	145	136	132	97	242	172	82	96	131	94	91	64	131	67	145	85	90	39
ENSG00000065911	MTHFD2	13	11	14	10	27	19	5	12	11	42	40	33	51	11	91	17	60	12
ENSG00000065923	SLC9A7	387	406	385	376	525	493	255	456	459	128	394	234	171	110	223	137	225	95
ENSG00000065970	FOXJ2	40	28	47	25	70	36	19	51	46	79	98	54	26	31	32	34	54	19
ENSG00000065978	YBX1	818	598	432	426	722	807	316	653	1548	133	2149	561	799	174	1671	275	767	683
ENSG00000065989	PDE4A	27	8	7	19	13	0	179	10	23	68	73	15	31	22	43	2	83	3
ENSG00000066027	PPP2R5A	76	74	99	83	168	98	29	107	97	84	128	112	118	66	216	52	146	77
ENSG00000066032	CTNNA2	0	0	0	0	0	0	0	0	0	0	0	0	0	0	0	0	0	0
ENSG00000066044	ELAVL1	40	58	72	61	119	76	44	74	96	269	126	124	118	111	70	117	178	46
ENSG00000066056	TIE1	3	2	4	0	4	0	4	8	2	40	46	27	15	42	2	18	1	13
ENSG00000066084	DIP2B	112	77	78	45	123	68	93	57	94	27	56	44	84	33	48	36	58	16
ENSG00000066117	SMARCD1	93	62	76	57	161	112	63	89	127	87	170	76	72	42	156	48	116	28
ENSG00000066135	KDM4A	71	57	57	51	134	107	26	102	94	88	64	60	87	50	75	65	102	39
ENSG00000066136	NFYC	41	59	78	52	135	73	16	61	45	118	56	65	38	57	46	62	60	11
ENSG00000066185	ZMYND12	0	1	1	1	3	1	1	0	2	2	2	1	4	0	0	0	0	0
ENSG00000066230	SLC9A3	0	0	0	0	0	0	0	0	0	0	0	0	0	0	0	0	0	0
ENSG00000066248	NGEF	0	0	0	0	0	0	0	0	0	0	0	0	0	0	0	0	0	0
ENSG00000066279	ASPM	2	0	0	5	17	11	2	2	3	36	284	159	33	45	130	106	180	67
ENSG00000066294	CD84	98	88	83	87	153	166	53	72	116	23	108	25	146	107	69	69	7	7
ENSG00000066322	ELOVL1	66	114	92	47	225	86	58	101	107	54	64	90	46	124	21	81	178	10
ENSG00000066336	SPI1	141	171	141	117	353	171	82	205	179	101	134	118	69	313	63	84	179	25
ENSG00000066379	ZNRD1	22	34	44	37	57	24	39	41	62	73	23	27	25	26	19	35	29	11
ENSG00000066382	MPPED2	5	11	7	7	9	7	1	5	1	119	2	0	0	20	1	0	0	0
ENSG00000066405	CLDN18	0	0	0	0	1	2	0	0	0	0	0	0	4	0	0	0	0	0
ENSG00000066422	ZBTB11	125	87	88	101	108	159	50	101	72	30	78	47	66	37	148	31	53	32
ENSG00000066427	ATXN3	151	173	153	123	258	203	75	127	89	141	253	247	184	140	93	190	203	106
ENSG00000066455	GOLGA5	11	15	12	5	28	20	1	12	32	12	27	15	15	4	2	12	8	13
ENSG00000066468	FGFR2	0	0	0	0	1	0	0	0	0	0	0	0	0	0	0	0	0	0
ENSG00000066557	LRRC40	15	13	12	21	36	16	11	16	9	55	40	13	18	15	34	30	46	8
ENSG00000066583	ISOC1	7	10	9	12	14	10	4	27	12	31	10	7	5	6	3	7	13	0
ENSG00000066629	EML1	0	0	0	0	0	0	0	0	0	0	3	0	0	0	0	0	5	0
ENSG00000066651	TRMT11	10	6	6	11	12	17	2	11	7	3	14	9	23	8	1	10	26	10
ENSG00000066654	THUMPD1	252	244	241	200	301	240	144	325	101	138	188	223	138	105	147	153	236	76
ENSG00000066697	MSANTD3	14	6	6	8	11	9	4	2	10	24	32	8	11	2	8	7	6	5
ENSG00000066735	KIF26A	0	0	0	1	1	0	0	0	11	231	24	33	14	2	7	4	204	1
ENSG00000066739	ATG2B	51	17	28	54	40	58	11	25	23	74	48	29	25	15	28	28	29	24
ENSG00000066777	ARFGEF1	168	144	175	116	264	209	90	124	92	74	197	223	205	127	220	167	159	106
ENSG00000066813	ACSM2B	0	0	0	0	0	0	0	0	0	0	0	0	0	0	0	0	0	0
ENSG00000066827	ZFAT	69	45	34	31	59	51	40	50	74	41	21	68	78	26	13	38	51	9
ENSG00000066855	MTFR1	5	4	4	5	11	6	2	5	10	9	9	9	10	1	1	7	11	1
ENSG00000066923	STAG3	14	33	85	25	29	11	13	4	54	2442	94	144	584	18	32	128	1	21
ENSG00000066926	FECH	13	1	12	9	11	7	2	7	7	78	25	29	33	20	10	47	14	4
ENSG00000066933	MYO9A	146	114	132	140	181	132	59	141	115	59	49	81	141	103	31	100	123	74
ENSG00000067048	DDX3Y	0	0	0	317	0	1	495	637	0	273	0	0	0	1	0	226	556	0
ENSG00000067057	PFKP	106	298	105	120	296	249	155	258	97	65	97	105	43	341	23	382	718	100
ENSG00000067064	IDI1	134	60	102	212	104	87	36	160	75	419	124	49	98	19	125	60	68	54
ENSG00000067066	SP100	1436	1730	2230	1424	1739	2148	390	1442	926	137	376	245	679	427	392	221	715	250
ENSG00000067082	KLF6	1732	1452	2876	2836	2393	2136	638	2547	2161	164	2218	3844	2110	1496	4550	1792	3137	3425
ENSG00000067113	PPAP2A	9	7	5	10	16	8	6	12	20	7	9	1	7	21	2	6	4	5
ENSG00000067141	NEO1	0	0	0	0	0	0	0	0	0	15	4	34	0	2	1	0	16	5
ENSG00000067167	TRAM1	51	41	84	46	121	86	35	41	53	148	135	81	72	52	54	61	76	43
ENSG00000067177	PHKA1	0	0	0	0	0	0	0	0	0	0	0	0	0	0	0	0	0	0
ENSG00000067182	TNFRSF1A	7	2	10	1	28	6	7	18	24	150	84	121	78	209	48	209	76	28
ENSG00000067191	CACNB1	5	3	1	1	6	1	0	1	2	18	20	18	9	14	13	7	21	9
ENSG00000067208	EVI5	186	125	150	110	216	172	72	145	85	48	51	78	56	38	26	31	142	54
ENSG00000067221	STOML1	8	34	22	9	50	23	5	25	8	11	4	14	5	16	4	12	14	5
ENSG00000067225	PKM	641	718	589	453	1389	681	573	578	847	1008	975	902	491	1211	260	1045	1806	283
ENSG00000067248	DHX29	172	130	171	103	229	181	64	130	139	41	338	165	149	96	275	136	244	123
ENSG00000067334	DNTTIP2	171	72	134	56	145	150	53	126	97	47	347	157	191	73	387	93	213	134
ENSG00000067365	METTL22	6	10	17	36	24	10	8	21	16	24	32	6	20	25	43	18	47	11
ENSG00000067369	TP53BP1	99	73	68	65	99	102	46	103	64	149	144	74	184	51	221	75	78	68
ENSG00000067445	TRO	0	6	2	12	14	9	8	2	15	136	0	32	0	0	5	10	0	6
ENSG00000067533	RRP15	89	78	74	87	143	153	30	105	84	23	113	80	64	29	170	41	89	46
ENSG00000067560	RHOA	338	321	453	585	845	402	73	620	707	821	2585	911	651	1023	1595	844	1833	649
ENSG00000067596	DHX8	38	49	33	38	87	67	28	46	90	56	106	66	40	35	82	42	78	51
ENSG00000067606	PRKCZ	20	30	32	29	108	21	47	46	37	81	5	10	64	7	37	7	2	2
ENSG00000067646	ZFY	0	0	0	16	0	1	54	17	0	13	0	0	0	0	0	18	26	0
ENSG00000067704	IARS2	24	21	21	30	48	36	8	22	37	53	55	30	27	24	13	20	21	12
ENSG00000067715	SYT1	29	25	7	27	82	39	17	8	14	21	116	22	1	0	110	0	125	28
ENSG00000067798	NAV3	0	0	0	0	0	1	0	0	0	0	0	0	0	0	0	0	8	0
ENSG00000067829	IDH3G	69	95	95	90	135	70	35	78	109	55	182	112	80	83	35	57	158	44
ENSG00000067836	ROGDI	27	55	53	38	105	48	29	57	45	107	60	73	88	162	33	99	277	20
ENSG00000067840	PDZD4	1	4	1	0	1	1	2	1	2	7	0	5	3	0	0	0	0	0
ENSG00000067842	ATP2B3	0	0	0	0	0	2	0	0	0	0	0	0	0	0	0	0	0	0
ENSG00000067900	ROCK1	1050	617	812	701	1002	1041	386	798	780	179	1562	516	718	337	1282	566	602	768
ENSG00000067955	CBFB	74	147	160	98	279	159	102	127	87	101	161	160	123	215	86	198	308	30
ENSG00000067992	PDK3	21	29	15	32	44	23	20	38	26	37	58	48	21	20	31	15	33	19
ENSG00000068001	HYAL2	1	4	3	2	5	1	0	3	4	9	0	5	4	4	1	5	5	2
ENSG00000068024	HDAC4	19	21	10	7	45	20	18	31	16	19	23	23	41	30	11	26	21	4
ENSG00000068028	RASSF1	243	397	274	163	464	334	329	306	212	116	324	220	258	363	266	361	396	80
ENSG00000068078	FGFR3	0	0	0	0	1	0	0	0	0	0	0	2	0	0	0	0	1	0
ENSG00000068079	IFI35	24	67	49	31	114	67	23	57	38	44	6	42	45	334	13	49	86	8
ENSG00000068097	HEATR6	82	66	88	71	157	183	58	76	72	20	28	33	22	50	0	34	18	20
ENSG00000068120	COASY	52	95	78	63	116	61	39	95	59	93	60	90	36	143	26	75	137	32
ENSG00000068137	PLEKHH3	1	0	1	0	1	0	0	0	3	4	0	1	6	0	0	4	0	2
ENSG00000068305	MEF2A	213	172	170	167	314	297	96	160	153	135	240	184	131	195	477	124	729	163
ENSG00000068308	OTUD5	241	376	286	221	648	386	300	379	297	211	446	408	146	202	269	209	274	126
ENSG00000068323	TFE3	105	164	114	104	218	136	209	146	148	77	98	133	55	96	95	83	106	48
ENSG00000068354	TBC1D25	53	49	51	34	103	75	82	56	52	48	116	90	33	32	35	32	56	28
ENSG00000068366	ACSL4	40	14	28	33	41	26	9	18	35	88	89	52	33	43	25	36	48	29
ENSG00000068383	INPP5A	63	80	66	61	154	98	60	76	51	62	88	111	21	111	134	60	39	45
ENSG00000068394	GPKOW	4	16	9	12	45	8	6	9	14	45	24	26	16	14	12	10	20	8
ENSG00000068400	GRIPAP1	937	1757	943	643	2445	1585	1609	953	812	506	843	1912	763	1034	297	1082	1522	410
ENSG00000068438	FTSJ1	22	42	52	37	75	41	15	30	23	72	74	72	19	50	21	42	80	36
ENSG00000068489	PRR11	5	7	8	5	28	20	5	13	11	67	202	189	22	84	77	121	172	65
ENSG00000068615	REEP1	0	0	0	0	1	0	0	0	0	0	0	0	0	0	0	0	0	0
ENSG00000068650	ATP11A	85	48	57	51	88	105	50	62	37	43	126	66	110	35	19	63	186	22
ENSG00000068654	POLR1A	37	32	39	28	70	31	26	30	34	47	43	49	57	33	34	42	90	10
ENSG00000068697	LAPTM4A	257	338	286	292	490	303	192	383	271	846	823	482	287	384	375	543	340	122
ENSG00000068724	TTC7A	233	318	331	290	462	386	159	276	353	494	263	241	209	309	264	272	306	104
ENSG00000068745	IP6K2	75	125	114	84	177	145	40	118	127	212	146	78	118	54	371	90	141	39
ENSG00000068781	STON1-GTF2A1L	0	0	0	0	0	0	0	0	0	0	0	0	0	0	0	0	0	0
ENSG00000068784	SRBD1	69	63	42	40	89	123	20	46	40	109	18	23	65	28	26	74	53	20
ENSG00000068796	KIF2A	247	122	123	131	308	227	76	224	138	23	315	138	159	61	141	92	148	95
ENSG00000068831	RASGRP2	801	945	1174	1465	2171	1419	317	1386	727	762	727	1230	896	992	270	1362	923	384
ENSG00000068878	PSME4	321	374	373	376	616	507	215	409	256	214	550	137	239	116	867	145	302	129
ENSG00000068885	IFT80	9	13	21	16	31	17	6	19	9	49	5	7	9	9	12	24	12	1
ENSG00000068903	SIRT2	31	45	66	41	75	75	12	62	74	92	50	46	81	30	54	50	55	22
ENSG00000068912	ERLEC1	52	38	38	37	86	69	15	56	58	26	58	38	38	35	43	35	42	19
ENSG00000068971	PPP2R5B	57	70	71	62	167	85	50	84	60	5	3	25	17	23	0	24	25	3
ENSG00000068976	PYGM	20	42	20	14	27	11	25	26	18	11	8	21	4	13	11	65	9	4
ENSG00000068985	PAGE1	0	0	0	0	0	0	0	0	0	0	0	0	0	0	0	0	0	0
ENSG00000069011	PITX1	0	0	0	0	0	0	0	0	0	1	0	1	0	0	0	5	0	0
ENSG00000069018	TRPC7	0	0	0	0	0	0	0	0	0	0	0	0	0	0	0	0	0	0
ENSG00000069020	MAST4	60	18	42	45	87	52	33	66	17	35	20	11	139	60	108	189	3	3
ENSG00000069122	ADGRF5	0	0	0	0	0	0	0	0	0	0	0	0	0	0	0	2	0	0
ENSG00000069188	SDK2	82	34	28	29	29	35	30	51	86	35	45	67	134	28	22	71	1	56
ENSG00000069206	ADAM7	0	0	0	0	0	0	0	0	0	0	0	0	0	0	0	0	0	0
ENSG00000069248	NUP133	27	39	40	26	69	51	24	35	13	104	85	54	33	44	28	65	72	23
ENSG00000069275	NUCKS1	1520	1293	1768	914	1835	1673	909	1197	1435	858	4122	2928	1697	1409	1902	1787	1982	1232
ENSG00000069329	VPS35	226	196	275	159	425	319	130	239	207	181	267	240	282	251	63	211	297	116
ENSG00000069345	DNAJA2	84	57	56	37	78	72	30	44	106	25	79	36	34	18	101	24	51	25
ENSG00000069399	BCL3	86	123	89	64	135	86	519	145	194	60	305	74	120	70	340	23	56	53
ENSG00000069424	KCNAB2	141	181	182	150	335	148	126	169	210	161	218	329	244	443	61	312	1303	156
ENSG00000069431	ABCC9	0	0	0	0	0	0	0	0	0	0	0	0	0	0	1	0	0	0
ENSG00000069482	GAL	0	0	0	0	0	0	0	0	0	1	0	0	0	0	1	1	0	0
ENSG00000069493	CLEC2D	739	507	780	612	940	1304	454	878	485	91	321	255	144	224	100	121	124	77
ENSG00000069509	FUNDC1	8	17	19	2	28	20	5	15	19	29	39	27	14	27	20	15	31	28
ENSG00000069535	MAOB	0	0	0	0	1	0	0	0	0	0	0	1	0	0	0	0	0	0
ENSG00000069667	RORA	19	4	16	2	18	4	4	7	13	10	47	13	29	11	22	16	8	16
ENSG00000069696	DRD4	2	1	0	0	1	0	0	0	0	2	1	0	0	1	0	2	0	0
ENSG00000069702	TGFBR3	5	2	12	0	4	5	5	8	6	7	7	6	7	2	2	7	79	5
ENSG00000069764	PLA2G10	0	0	1	0	1	0	0	0	0	8	0	9	0	3	0	1	0	0
ENSG00000069812	HES2	0	0	3	1	3	2	0	0	0	0	0	0	3	2	1	0	2	0
ENSG00000069849	ATP1B3	414	140	232	185	193	113	363	163	210	780	774	270	509	257	326	206	527	128
ENSG00000069869	NEDD4	4	0	0	0	2	0	2	4	0	3	28	21	30	18	15	28	1	18
ENSG00000069943	PIGB	40	8	15	37	35	27	3	28	16	38	15	5	7	21	8	5	22	6
ENSG00000069956	MAPK6	30	27	27	28	49	28	54	31	36	80	99	53	64	49	103	29	60	37
ENSG00000069966	GNB5	273	180	227	171	353	290	184	176	334	72	72	62	118	44	69	35	94	15
ENSG00000069974	RAB27A	16	34	27	17	84	41	15	68	42	55	110	107	32	66	4	74	28	32
ENSG00000069998	CECR5	8	2	7	30	32	16	0	16	9	59	11	46	39	18	21	19	38	13
ENSG00000070010	UFD1L	77	100	76	93	199	118	64	139	78	167	227	152	90	144	98	107	255	86
ENSG00000070018	LRP6	6	2	2	7	6	5	2	2	2	18	19	9	11	4	29	14	0	11
ENSG00000070019	GUCY2C	0	0	0	0	0	0	0	0	0	0	0	0	0	0	0	0	0	0
ENSG00000070031	SCT	0	0	0	0	0	0	0	0	0	0	0	0	0	0	0	0	0	0
ENSG00000070047	PHRF1	88	123	84	70	190	136	52	180	109	212	105	121	109	52	158	78	136	63
ENSG00000070061	IKBKAP	20	22	30	28	34	31	18	29	9	39	17	23	25	17	8	22	40	13
ENSG00000070081	NUCB2	45	26	49	35	101	29	21	59	49	233	458	323	532	334	115	401	161	107
ENSG00000070087	PFN2	1	0	0	0	0	1	0	1	1	7	1	2	0	0	0	2	0	2
ENSG00000070159	PTPN3	0	0	0	0	0	0	0	0	1	0	0	0	1	0	0	0	0	0
ENSG00000070182	SPTB	6	0	2	4	10	1	1	0	0	56	2	13	3	0	3	12	1	1
ENSG00000070190	DAPP1	72	69	135	105	197	143	34	98	126	25	33	27	10	59	3	21	11	15
ENSG00000070193	FGF10	0	0	0	0	0	0	0	0	0	0	0	0	0	0	0	0	0	0
ENSG00000070214	SLC44A1	79	35	89	42	72	74	13	51	40	119	52	33	67	93	83	260	135	13
ENSG00000070269	TMEM260	28	28	30	22	60	58	14	26	36	18	4	16	21	14	8	22	18	14
ENSG00000070366	SMG6	66	53	45	26	104	43	30	68	76	39	80	50	68	42	46	40	77	46
ENSG00000070367	EXOC5	34	42	35	32	57	53	7	49	44	54	55	55	50	20	9	46	47	39
ENSG00000070371	CLTCL1	7	0	3	0	6	0	2	6	2	3	1	7	7	2	1	6	6	0
ENSG00000070388	FGF22	1	2	0	0	0	0	0	1	1	0	0	0	0	0	0	0	0	0
ENSG00000070404	FSTL3	1	2	2	4	7	3	2	3	1	6	5	2	10	3	16	19	11	2
ENSG00000070413	DGCR2	43	44	80	46	135	70	23	64	56	124	37	58	21	55	21	52	70	16
ENSG00000070423	RNF126	112	166	188	175	282	185	60	264	274	297	337	111	69	102	184	119	302	79
ENSG00000070444	MNT	112	68	114	43	122	103	69	76	102	47	72	61	74	63	39	42	97	23
ENSG00000070476	ZXDC	78	76	87	51	135	98	35	65	50	102	44	37	73	44	15	82	92	14
ENSG00000070495	JMJD6	51	66	44	40	71	48	28	94	44	58	155	123	219	29	673	53	115	45
ENSG00000070501	POLB	44	30	34	41	82	35	79	51	50	64	80	60	44	52	92	46	41	22
ENSG00000070526	ST6GALNAC1	1	0	1	0	4	0	0	0	1	1	0	0	0	1	0	0	0	0
ENSG00000070540	WIPI1	19	2	10	3	21	8	11	13	7	11	3	4	6	5	1	8	9	2
ENSG00000070601	FRMPD1	0	0	0	0	0	1	0	0	0	0	1	0	0	0	0	0	0	0
ENSG00000070610	GBA2	54	86	88	119	175	68	41	71	96	80	8	29	79	66	25	64	72	19
ENSG00000070614	NDST1	54	60	18	30	112	59	39	52	46	88	43	194	91	128	10	112	69	16
ENSG00000070669	ASNS	50	152	147	78	153	83	37	134	89	54	43	26	38	91	4	56	170	28
ENSG00000070718	AP3M2	19	31	31	40	65	50	20	50	20	50	108	90	67	70	34	51	67	22
ENSG00000070729	CNGB1	0	0	0	0	0	0	0	0	0	0	0	0	0	0	0	0	0	0
ENSG00000070731	ST6GALNAC2	2	0	4	1	3	0	0	2	7	0	3	0	30	3	3	8	1	1
ENSG00000070748	CHAT	0	0	0	0	0	0	0	0	0	0	0	0	0	0	0	0	0	0
ENSG00000070756	PABPC1	7991	5429	3986	5927	11696	9504	3775	7338	10109	375	6964	5535	4875	1981	7696	3899	8831	2251
ENSG00000070759	TESK2	21	21	11	21	23	10	8	21	48	5	12	7	27	1	12	1	8	6
ENSG00000070761	CFAP20	4	5	15	16	15	16	1	16	7	86	22	27	13	16	66	16	8	12
ENSG00000070770	CSNK2A2	77	57	84	109	152	123	31	95	125	186	279	107	112	63	207	82	185	70
ENSG00000070778	PTPN21	0	0	0	0	0	0	0	0	0	0	0	0	0	0	0	0	0	0
ENSG00000070785	EIF2B3	29	33	36	19	43	49	13	33	38	32	8	31	27	22	17	24	50	16
ENSG00000070808	CAMK2A	0	0	0	0	0	0	0	0	0	0	0	0	0	0	4	0	2	8
ENSG00000070814	TCOF1	125	160	254	282	278	218	45	205	161	352	205	184	179	94	79	95	232	126
ENSG00000070831	CDC42	252	251	425	386	689	362	77	425	335	496	959	400	251	376	831	348	629	204
ENSG00000070882	OSBPL3	63	63	86	53	69	82	68	55	65	19	18	15	20	44	19	36	67	7
ENSG00000070886	EPHA8	0	0	0	0	0	0	0	0	0	0	1	0	0	0	0	0	0	0
ENSG00000070915	SLC12A3	1	0	5	1	2	0	0	0	1	1	8	0	16	10	1	9	0	0
ENSG00000070950	RAD18	44	27	26	22	39	50	13	31	16	24	46	31	37	21	24	16	32	9
ENSG00000070961	ATP2B1	1205	885	1248	1154	1029	1375	432	1274	801	56	857	136	98	225	138	127	366	329
ENSG00000070985	TRPM5	0	0	0	2	2	0	0	0	0	18	1	0	1	1	0	1	0	1
ENSG00000071051	NCK2	141	202	251	234	227	191	74	191	168	110	104	48	58	18	31	56	86	49
ENSG00000071054	MAP4K4	747	588	685	573	936	945	394	685	700	389	897	483	373	184	194	278	361	365
ENSG00000071073	MGAT4A	29	18	29	9	40	14	7	41	12	84	151	532	83	63	25	73	205	48
ENSG00000071082	RPL31	4472	5570	5789	8513	11395	5714	3110	7966	6109	5324	7391	4376	3737	5082	7989	5746	10085	3903
ENSG00000071127	WDR1	117	120	161	145	293	159	61	180	144	232	205	197	172	221	225	140	316	60
ENSG00000071189	SNX13	101	58	69	70	84	107	34	95	45	34	104	46	88	28	40	55	55	43
ENSG00000071203	MS4A12	0	0	0	0	0	0	0	0	0	0	0	0	0	0	0	0	0	0
ENSG00000071205	ARHGAP10	2	0	6	0	8	1	0	7	3	5	1	35	3	37	0	24	0	5
ENSG00000071242	RPS6KA2	16	19	25	18	33	24	23	36	21	34	4	2	3	9	6	12	21	2
ENSG00000071243	ING3	184	71	214	138	159	199	34	162	136	60	356	94	135	40	342	65	119	51
ENSG00000071246	VASH1	24	11	20	32	84	36	26	15	10	39	5	11	18	43	6	6	10	7
ENSG00000071282	LMCD1	0	1	0	2	0	1	0	0	0	0	0	0	4	3	3	0	0	0
ENSG00000071462	WBSCR22	119	167	164	87	184	158	84	120	118	67	216	101	132	121	245	84	178	42
ENSG00000071537	SEL1L	87	68	69	34	101	95	30	64	52	54	136	106	56	65	48	91	107	61
ENSG00000071539	TRIP13	1	0	0	4	0	0	0	0	1	13	8	9	1	6	2	3	9	1
ENSG00000071553	ATP6AP1	84	159	151	152	200	189	48	199	335	177	413	301	251	251	63	146	173	156
ENSG00000071564	TCF3	277	366	336	434	705	504	178	418	326	1548	1144	821	382	375	246	524	806	296
ENSG00000071575	TRIB2	207	596	403	431	828	517	211	595	467	110	284	67	16	81	63	21	18	49
ENSG00000071626	DAZAP1	241	397	407	552	712	428	227	394	516	641	907	521	296	455	326	458	1055	208
ENSG00000071655	MBD3	84	141	112	81	237	151	105	88	96	97	51	105	73	172	23	123	226	21
ENSG00000071677	PRLH	0	0	0	0	0	0	0	0	0	0	0	0	0	0	0	0	0	0
ENSG00000071794	HLTF	56	34	40	21	60	56	19	26	31	29	41	71	59	37	7	35	49	23
ENSG00000071859	FAM50A	35	108	55	48	153	69	43	78	67	58	81	104	71	68	24	45	105	58
ENSG00000071889	FAM3A	39	68	65	41	119	43	37	83	61	45	29	60	26	85	19	80	83	23
ENSG00000071894	CPSF1	150	189	184	221	395	267	56	304	258	549	344	224	171	275	92	274	268	79
ENSG00000071909	MYO3B	0	1	0	1	0	10	0	2	0	0	0	0	0	0	0	0	0	0
ENSG00000071967	CYBRD1	1	0	2	0	0	0	1	0	1	6	9	8	0	7	2	19	0	0
ENSG00000071991	CDH19	0	0	0	0	0	0	0	0	0	0	0	0	0	0	0	0	0	0
ENSG00000071994	PDCD2	58	81	91	103	158	100	19	103	87	95	96	80	61	60	23	106	158	34
ENSG00000072041	SLC6A15	0	0	1	0	0	0	0	0	0	0	0	0	0	0	0	0	0	0
ENSG00000072042	RDH11	186	214	183	153	287	187	136	161	123	177	120	332	164	163	45	120	239	77
ENSG00000072062	PRKACA	32	84	59	58	147	57	25	107	114	155	177	91	77	84	27	64	180	29
ENSG00000072071	ADGRL1	7	2	15	12	19	9	1	10	5	139	20	62	143	28	29	39	26	13
ENSG00000072080	SPP2	0	0	0	0	0	0	0	0	0	0	0	0	0	0	0	0	0	0
ENSG00000072110	ACTN1	91	10	46	18	189	48	29	119	113	70	102	351	354	271	18	641	639	112
ENSG00000072121	ZFYVE26	33	41	44	40	57	52	34	52	28	44	29	39	42	64	7	50	41	22
ENSG00000072133	RPS6KA6	0	0	0	0	0	0	1	0	0	0	0	0	0	0	1	0	0	0
ENSG00000072134	EPN2	78	84	38	24	89	63	47	49	72	143	4	6	6	0	3	6	1	4
ENSG00000072135	PTPN18	264	318	276	156	517	277	178	232	364	243	146	170	159	394	109	268	528	43
ENSG00000072163	LIMS2	102	382	183	120	499	291	246	205	252	115	83	54	23	7	1	1	551	20
ENSG00000072182	ASIC4	0	1	0	0	1	0	1	1	0	0	0	0	0	0	0	1	0	0
ENSG00000072195	SPEG	2	0	2	0	3	1	0	0	0	4	1	1	2	0	0	0	0	0
ENSG00000072201	LNX1	0	0	1	2	0	0	0	0	0	0	0	0	0	2	0	0	0	0
ENSG00000072210	ALDH3A2	13	6	15	18	26	22	2	6	30	22	18	13	11	15	9	10	1	1
ENSG00000072274	TFRC	52	56	70	77	97	57	53	77	37	336	209	118	99	49	302	134	89	27
ENSG00000072310	SREBF1	8	4	10	12	5	7	9	4	8	19	10	7	39	4	19	8	8	4
ENSG00000072315	TRPC5	0	0	0	0	0	0	0	0	0	0	0	0	0	0	0	0	0	0
ENSG00000072364	AFF4	429	223	228	172	293	341	155	177	185	129	621	160	352	83	560	149	200	184
ENSG00000072401	UBE2D1	4	11	16	14	29	17	1	17	9	21	19	7	3	19	1	4	11	6
ENSG00000072415	MPP5	19	25	27	18	29	18	12	18	20	14	19	31	29	10	7	40	14	16
ENSG00000072422	RHOBTB1	26	15	25	10	28	16	11	27	28	23	12	1	1	1	9	15	0	0
ENSG00000072501	SMC1A	509	437	569	266	453	591	156	289	592	182	1055	830	501	262	322	205	298	380
ENSG00000072506	HSD17B10	51	106	70	64	185	114	61	80	98	73	110	88	51	90	20	50	158	38
ENSG00000072518	MARK2	213	308	272	226	490	345	155	311	291	142	154	179	170	158	82	147	228	64
ENSG00000072571	HMMR	2	1	0	0	1	3	1	0	2	18	20	36	9	13	14	21	17	3
ENSG00000072609	CHFR	73	111	81	81	173	111	52	80	94	61	18	71	35	69	34	31	158	21
ENSG00000072657	TRHDE	0	0	0	0	0	0	0	0	3	0	0	0	0	3	0	1	0	0
ENSG00000072682	P4HA2	0	0	0	0	1	3	0	1	5	13	18	42	5	4	1	4	25	7
ENSG00000072694	FCGR2B	52	56	64	64	119	96	19	55	52	3	0	1	0	13	12	2	1	0
ENSG00000072736	NFATC3	259	340	476	693	783	486	90	563	392	530	340	417	304	258	129	273	550	103
ENSG00000072756	TRNT1	13	9	19	9	24	15	7	11	9	7	22	12	23	19	10	16	15	5
ENSG00000072778	ACADVL	105	128	128	127	243	143	57	141	122	327	165	239	234	298	83	219	507	173
ENSG00000072786	STK10	258	214	335	209	461	294	223	275	295	121	98	120	239	217	143	148	301	87
ENSG00000072803	FBXW11	50	75	60	99	122	115	57	90	93	51	90	29	38	28	64	25	42	20
ENSG00000072818	ACAP1	508	520	454	463	1276	717	531	422	515	335	103	114	213	503	128	212	342	88
ENSG00000072832	CRMP1	5	0	0	3	1	0	0	0	0	253	17	10	1	0	26	0	3	20
ENSG00000072840	EVC	0	0	0	0	0	0	0	0	0	0	0	0	0	0	0	0	0	0
ENSG00000072849	DERL2	27	46	51	41	79	45	28	65	35	66	46	72	24	59	32	48	65	30
ENSG00000072858	SIDT1	85	80	72	100	79	101	34	100	77	58	31	16	28	7	64	20	29	10
ENSG00000072864	NDE1	121	152	159	115	236	167	165	157	181	31	202	265	158	120	65	75	163	96
ENSG00000072952	MRVI1	4	7	5	6	21	13	0	2	9	60	35	103	13	6	0	4	37	14
ENSG00000072954	TMEM38A	28	39	47	20	71	40	19	54	38	2	1	1	17	4	2	3	2	2
ENSG00000072958	AP1M1	126	225	207	116	372	253	82	194	240	148	125	155	149	244	31	134	335	43
ENSG00000073008	PVR	0	3	0	0	7	0	2	6	2	3	0	8	0	18	0	21	0	0
ENSG00000073050	XRCC1	90	161	167	95	254	159	89	130	137	201	92	185	105	69	26	157	162	25
ENSG00000073060	SCARB1	24	43	21	48	60	58	12	45	38	501	33	60	80	68	37	73	92	21
ENSG00000073067	CYP2W1	0	0	0	1	0	0	0	0	0	0	0	1	0	0	0	1	0	0
ENSG00000073111	MCM2	11	11	24	17	40	30	1	15	22	553	73	159	138	91	38	150	75	22
ENSG00000073146	MOV10L1	0	0	0	0	0	0	0	2	0	0	2	0	0	0	0	0	0	0
ENSG00000073150	PANX2	5	3	1	1	4	1	1	4	0	0	32	23	25	10	68	14	1	9
ENSG00000073169	SELO	48	47	39	34	79	42	29	62	28	63	157	43	49	55	95	56	85	17
ENSG00000073282	TP63	0	0	0	0	0	0	0	0	2	9	0	0	0	0	0	0	1	0
ENSG00000073331	ALPK1	36	25	16	22	58	58	24	40	45	33	26	43	52	47	4	74	33	6
ENSG00000073350	LLGL2	32	26	42	40	78	53	12	58	62	17	24	22	56	24	10	11	44	12
ENSG00000073417	PDE8A	41	26	32	38	56	71	28	27	23	8	32	3	17	19	77	15	31	6
ENSG00000073464	CLCN4	45	96	67	64	136	100	37	74	75	5	45	1	0	5	2	2	3	0
ENSG00000073536	NLE1	11	18	9	10	36	9	6	13	15	14	8	14	15	7	13	16	47	8
ENSG00000073578	SDHA	18	46	43	53	58	42	14	63	65	182	159	55	47	56	56	76	150	24
ENSG00000073584	SMARCE1	276	172	221	178	233	218	142	223	190	182	482	209	164	148	150	205	244	146
ENSG00000073598	FNDC8	0	0	0	0	0	0	0	0	0	0	0	0	0	0	0	0	0	0
ENSG00000073605	GSDMB	46	98	157	67	190	110	64	77	85	101	17	42	48	61	14	55	77	29
ENSG00000073614	KDM5A	761	752	1046	794	1324	1148	455	996	693	510	1257	541	764	563	2185	507	516	442
ENSG00000073670	ADAM11	0	3	0	1	2	2	0	1	0	0	0	4	0	1	1	0	0	2
ENSG00000073711	PPP2R3A	0	0	1	0	0	0	0	0	0	0	0	0	0	0	0	0	0	0
ENSG00000073712	FERMT2	0	0	1	0	0	1	0	0	0	4	9	3	1	0	5	1	0	10
ENSG00000073734	ABCB11	0	0	0	0	0	0	0	0	0	0	0	0	0	0	0	0	0	0
ENSG00000073737	DHRS9	0	0	1	1	4	3	3	1	0	2	0	3	3	71	0	5	4	0
ENSG00000073754	CD5L	0	0	0	0	0	0	0	0	0	2	0	6	0	0	0	3	0	0
ENSG00000073756	PTGS2	10	3	16	0	27	29	5	40	97	0	0	0	0	3	1	3	14	0
ENSG00000073792	IGF2BP2	26	7	25	5	29	6	34	11	1	182	14	67	5	146	5	48	15	17
ENSG00000073803	MAP3K13	72	102	70	50	135	89	46	74	81	5	1	13	5	39	78	52	4	1
ENSG00000073849	ST6GAL1	257	307	444	499	663	351	213	458	418	195	55	48	58	83	23	69	109	35
ENSG00000073861	TBX21	6	15	25	5	29	8	7	14	17	30	30	27	20	10	10	16	22	18
ENSG00000073910	FRY	34	20	17	21	57	35	17	26	29	2	10	2	1	4	0	5	3	3
ENSG00000073921	PICALM	81	57	77	78	144	81	60	170	67	161	126	68	87	161	111	131	159	32
ENSG00000073969	NSF	32	19	18	33	48	36	6	29	13	44	34	47	21	34	15	23	36	15
ENSG00000074047	GLI2	0	0	0	0	0	0	0	0	0	0	0	0	0	1	0	60	0	0
ENSG00000074054	CLASP1	66	36	61	77	87	65	24	78	66	76	54	40	82	26	26	52	40	40
ENSG00000074071	MRPS34	32	104	88	110	217	119	11	133	152	113	48	73	48	95	30	98	209	27
ENSG00000074181	NOTCH3	2	0	0	0	0	0	0	0	0	2	0	1	0	0	0	2	0	0
ENSG00000074201	CLNS1A	44	55	86	82	133	99	13	73	85	118	84	88	120	80	26	96	109	24
ENSG00000074211	PPP2R2C	0	1	0	0	0	0	0	0	0	259	7	76	18	1	7	7	3	51
ENSG00000074219	TEAD2	11	12	4	3	32	2	11	22	33	2	0	2	0	0	0	1	1	0
ENSG00000074266	EED	25	15	23	34	51	32	4	29	13	81	34	23	21	25	21	28	13	8
ENSG00000074276	CDHR2	0	2	0	0	1	0	0	0	0	0	0	0	0	0	0	0	0	0
ENSG00000074317	SNCB	1	0	1	0	0	2	0	0	0	0	0	0	0	0	0	0	0	0
ENSG00000074319	TSG101	32	45	47	26	119	61	35	44	83	62	103	48	25	59	25	38	74	19
ENSG00000074356	C17orf85	214	163	169	124	253	266	96	150	151	175	255	225	500	167	378	138	234	115
ENSG00000074370	ATP2A3	554	820	824	554	1093	842	468	591	725	254	284	192	372	317	169	203	366	164
ENSG00000074410	CA12	0	0	0	0	0	0	0	0	0	0	0	0	0	0	0	0	0	0
ENSG00000074416	MGLL	24	2	5	4	20	8	7	21	13	1	14	12	7	299	1	133	0	0
ENSG00000074527	NTN4	0	0	0	0	0	0	0	0	0	0	0	0	0	0	0	0	0	0
ENSG00000074582	BCS1L	11	32	28	22	46	34	15	26	26	51	10	25	25	26	7	33	52	5
ENSG00000074590	NUAK1	0	0	0	0	0	0	0	0	0	0	0	1	0	0	1	0	0	0
ENSG00000074603	DPP8	102	117	152	186	234	181	26	111	84	247	132	115	92	102	66	117	138	59
ENSG00000074621	SLC24A1	7	5	24	6	13	12	1	6	8	12	10	21	30	23	11	31	19	20
ENSG00000074657	ZNF532	40	29	46	26	71	45	16	30	43	0	4	1	2	1	0	1	8	0
ENSG00000074660	SCARF1	0	0	0	0	2	0	0	1	0	93	19	21	12	15	6	10	14	8
ENSG00000074695	LMAN1	357	345	270	320	561	277	195	577	202	189	696	1012	691	418	285	870	1082	492
ENSG00000074696	HACD3	20	34	46	30	53	53	14	42	14	179	177	83	61	94	44	90	103	64
ENSG00000074706	IPCEF1	12	0	12	0	13	3	1	4	11	33	47	116	13	3	19	7	175	42
ENSG00000074755	ZZEF1	110	51	66	77	130	100	42	69	76	86	137	78	95	47	35	62	104	58
ENSG00000074771	NOX3	0	0	0	0	1	0	0	0	0	0	0	0	0	0	0	0	0	0
ENSG00000074800	ENO1	288	569	639	505	1213	555	275	706	865	412	1298	750	545	1707	462	1275	2484	341
ENSG00000074803	SLC12A1	0	0	0	0	0	0	0	0	0	0	0	0	0	0	0	0	0	0
ENSG00000074842	MYDGF	41	54	59	85	132	71	7	103	69	192	132	141	66	106	69	166	208	39
ENSG00000074855	ANO8	24	32	30	66	89	27	7	87	39	385	90	261	169	155	12	161	164	104
ENSG00000074935	TUBE1	0	5	26	4	6	11	2	10	0	8	7	9	6	3	3	1	4	7
ENSG00000074964	ARHGEF10L	0	0	7	1	11	1	1	2	3	3	1	1	0	18	0	4	22	0
ENSG00000074966	TXK	13	2	8	3	9	2	0	7	9	5	10	11	37	7	2	4	1	0
ENSG00000075035	WSCD2	0	0	0	0	0	0	0	0	0	0	0	0	0	0	0	0	0	0
ENSG00000075043	KCNQ2	0	0	0	0	0	0	0	2	7	2	7	1	0	3	2	1	19	2
ENSG00000075073	TACR2	0	3	0	0	0	0	0	0	0	0	2	1	0	1	0	0	1	0
ENSG00000075089	ACTR6	21	27	24	10	51	32	14	35	27	16	16	30	39	20	47	29	38	6
ENSG00000075131	TIPIN	5	8	9	6	12	3	7	3	4	16	8	13	10	7	10	7	11	8
ENSG00000075142	SRI	18	16	34	41	44	42	2	41	17	61	26	28	15	34	13	48	48	32
ENSG00000075151	EIF4G3	297	262	223	196	338	381	174	230	277	51	101	106	308	114	100	131	255	96
ENSG00000075188	NUP37	8	16	15	16	22	22	2	19	4	27	23	8	15	14	10	13	19	6
ENSG00000075213	SEMA3A	1	0	1	0	0	0	1	4	1	0	0	2	0	2	0	3	0	0
ENSG00000075218	GTSE1	0	0	1	0	5	4	0	1	0	65	65	27	3	15	21	16	25	4
ENSG00000075223	SEMA3C	2	1	0	1	1	1	0	0	0	0	0	0	0	0	1	0	0	1
ENSG00000075234	TTC38	2	5	9	0	7	1	7	15	10	9	32	32	17	53	10	19	60	8
ENSG00000075239	ACAT1	9	4	1	8	12	8	0	13	5	11	37	40	29	14	12	16	28	11
ENSG00000075240	GRAMD4	4	3	3	13	5	3	0	2	5	7	8	3	4	3	0	2	13	0
ENSG00000075275	CELSR1	11	8	21	12	28	12	5	11	12	2	25	21	2	0	2	1	9	7
ENSG00000075290	WNT8B	0	0	0	0	0	0	0	0	0	0	0	0	0	0	0	0	0	0
ENSG00000075292	ZNF638	271	233	222	209	336	366	111	216	160	101	139	160	257	78	101	134	120	111
ENSG00000075303	SLC25A40	15	14	26	15	41	15	8	23	5	36	5	10	9	25	3	42	15	5
ENSG00000075336	TIMM21	32	36	52	32	37	45	26	32	23	37	25	41	42	27	12	28	27	24
ENSG00000075340	ADD2	71	75	77	49	191	104	78	58	70	47	151	144	6	7	9	14	0	29
ENSG00000075388	FGF4	0	0	0	0	0	0	0	0	0	0	0	0	0	0	0	0	0	0
ENSG00000075391	RASAL2	1	2	1	0	1	0	1	0	0	4	1	3	0	0	0	3	0	1
ENSG00000075399	VPS9D1	43	27	31	21	55	20	15	25	16	14	15	5	14	62	8	31	29	3
ENSG00000075407	ZNF37A	59	98	90	85	184	138	32	96	39	90	214	230	178	68	101	104	162	51
ENSG00000075413	MARK3	207	217	200	225	329	287	118	234	207	229	162	154	195	82	186	136	226	85
ENSG00000075415	SLC25A3	176	149	175	365	335	201	55	279	189	337	589	178	183	189	830	252	584	145
ENSG00000075420	FNDC3B	14	3	9	0	11	3	8	2	10	12	54	19	13	26	4	28	5	1
ENSG00000075426	FOSL2	87	11	37	6	30	8	146	35	81	6	317	107	440	120	751	68	317	100
ENSG00000075429	CACNG5	0	0	0	0	0	0	0	0	0	0	0	0	0	0	0	0	0	0
ENSG00000075461	CACNG4	0	0	0	0	0	0	0	0	0	0	0	0	0	0	0	0	0	0
ENSG00000075539	FRYL	287	242	255	295	400	297	195	286	147	147	183	210	215	156	100	199	309	79
ENSG00000075568	TMEM131	140	73	89	110	153	151	48	94	107	70	43	72	71	36	44	40	66	38
ENSG00000075618	FSCN1	4	6	10	5	16	4	10	22	7	407	187	112	84	206	54	209	339	83
ENSG00000075624	ACTB	1302	4032	3034	1854	7284	3026	1626	3337	4003	2074	3142	3105	1178	7610	1400	3198	6363	550
ENSG00000075643	MOCOS	0	1	0	0	0	0	3	2	0	1	0	0	0	0	0	0	1	0
ENSG00000075651	PLD1	2	3	0	1	5	0	0	0	3	1	178	11	1	17	0	5	5	0
ENSG00000075673	ATP12A	0	0	0	0	0	0	0	0	0	0	0	0	1	0	0	0	0	0
ENSG00000075702	WDR62	4	1	4	4	1	3	6	0	1	19	13	13	5	4	14	10	39	5
ENSG00000075711	DLG1	251	218	235	203	263	272	196	212	124	64	152	117	192	72	65	82	241	79
ENSG00000075785	RAB7A	108	249	215	143	452	244	128	245	275	312	227	282	117	534	258	343	372	41
ENSG00000075790	BCAP29	47	50	44	68	129	72	7	64	37	53	82	71	58	51	17	58	82	21
ENSG00000075826	SEC31B	92	155	108	84	185	131	134	119	43	111	236	285	258	180	21	182	306	104
ENSG00000075856	SART3	118	150	166	66	194	176	79	120	87	82	153	108	131	99	261	91	129	46
ENSG00000075884	ARHGAP15	125	106	153	151	271	173	93	158	140	94	74	46	51	67	68	118	101	23
ENSG00000075886	TUBA3D	0	0	0	0	0	0	0	0	0	0	0	0	0	0	0	0	0	0
ENSG00000075891	PAX2	0	0	0	0	0	0	0	0	0	0	0	0	0	0	0	0	0	0
ENSG00000075914	EXOSC7	33	40	40	51	73	52	22	36	28	90	44	37	44	45	35	44	92	18
ENSG00000075945	KIFAP3	18	17	22	20	41	25	9	28	39	24	36	25	34	31	0	41	33	16
ENSG00000075975	MKRN2	5	12	17	15	42	21	0	11	11	55	22	25	18	14	40	20	28	8
ENSG00000076003	MCM6	14	0	5	2	9	3	1	7	8	157	76	76	30	35	39	43	66	13
ENSG00000076043	REXO2	9	30	30	22	63	37	3	32	18	94	18	66	31	28	29	66	28	17
ENSG00000076053	RBM7	42	23	45	59	38	52	21	46	23	27	44	28	28	27	34	20	34	8
ENSG00000076067	RBMS2	2	7	7	6	13	3	5	3	0	25	22	17	19	31	20	22	2	4
ENSG00000076108	BAZ2A	745	272	473	369	380	509	279	380	627	120	859	253	524	173	959	219	224	323
ENSG00000076201	PTPN23	44	91	105	107	159	79	59	126	117	137	85	92	88	112	42	88	115	16
ENSG00000076242	MLH1	22	31	31	51	42	31	11	39	39	79	27	26	11	26	31	29	38	15
ENSG00000076248	UNG	5	42	20	11	76	33	19	49	38	180	31	172	170	113	56	152	109	17
ENSG00000076258	FMO4	4	5	4	5	6	8	0	7	3	4	0	0	1	6	2	5	0	0
ENSG00000076321	KLHL20	61	56	83	44	103	81	24	77	58	26	74	66	55	39	31	49	50	39
ENSG00000076344	RGS11	0	0	0	0	0	0	0	1	0	0	0	0	0	0	0	0	0	0
ENSG00000076351	SLC46A1	0	0	0	0	3	0	0	0	0	1	0	2	0	0	0	0	0	0
ENSG00000076356	PLXNA2	1	3	5	1	1	7	0	1	0	0	0	3	0	1	2	5	0	2
ENSG00000076382	SPAG5	4	7	3	1	10	9	0	3	0	116	52	32	9	23	48	25	58	11
ENSG00000076513	ANKRD13A	197	249	273	207	473	272	266	195	299	110	182	175	156	171	121	196	277	43
ENSG00000076554	TPD52	156	276	248	248	428	301	115	311	234	70	55	10	9	19	37	44	224	14
ENSG00000076555	ACACB	5	5	10	15	17	18	6	4	5	35	6	15	58	8	4	21	10	0
ENSG00000076604	TRAF4	51	55	79	64	87	53	58	74	65	33	77	26	18	7	111	0	43	19
ENSG00000076641	PAG1	186	148	165	254	329	221	279	246	195	1527	1341	785	443	379	1031	581	905	522
ENSG00000076650	GPATCH1	70	35	80	51	80	82	16	56	81	39	26	40	52	16	21	33	37	30
ENSG00000076662	ICAM3	366	592	479	401	903	508	367	657	836	196	196	65	99	321	6	323	221	55
ENSG00000076685	NT5C2	128	135	127	83	240	156	127	133	82	407	277	329	154	221	135	228	303	113
ENSG00000076706	MCAM	4	0	0	0	0	0	0	0	0	0	18	0	2	0	146	1	0	1
ENSG00000076716	GPC4	0	0	0	0	1	0	0	0	0	2	4	1	0	0	0	0	0	0
ENSG00000076770	MBNL3	100	125	128	110	223	126	58	142	106	218	145	186	41	55	32	88	134	49
ENSG00000076826	CAMSAP3	0	0	0	0	1	0	0	0	0	0	0	0	0	0	0	0	0	0
ENSG00000076864	RAP1GAP	1	0	6	0	1	0	0	0	0	6	1	0	4	0	4	8	0	0
ENSG00000076924	XAB2	22	9	14	8	15	13	7	10	12	22	26	9	7	12	14	5	7	16
ENSG00000076928	ARHGEF1	140	87	149	145	161	160	50	169	98	357	41	57	102	42	18	43	50	31
ENSG00000076944	STXBP2	147	115	105	69	333	206	90	121	99	234	44	65	78	119	34	57	81	39
ENSG00000076984	MAP2K7	280	329	265	203	592	380	253	323	346	125	163	135	189	170	136	147	351	79
ENSG00000077009	NMRK2	0	0	0	0	0	0	0	0	0	0	0	0	0	0	0	0	0	0
ENSG00000077044	DGKD	1461	1362	913	876	1902	1861	1459	1246	1124	377	1335	488	360	138	423	165	1140	785
ENSG00000077063	CTTNBP2	0	0	0	0	0	1	0	0	0	0	0	0	0	0	0	0	0	0
ENSG00000077080	ACTL6B	0	0	0	0	0	0	0	0	0	0	0	0	0	0	0	0	0	0
ENSG00000077092	RARB	0	0	0	0	0	0	0	0	0	0	0	0	0	0	0	0	0	0
ENSG00000077097	TOP2B	179	146	175	275	477	334	74	234	198	1519	929	500	607	317	634	320	568	356
ENSG00000077147	TM9SF3	84	156	167	89	245	139	84	129	115	346	303	432	352	242	539	251	758	211
ENSG00000077150	NFKB2	559	658	665	312	496	456	1008	577	492	30	128	38	48	41	371	7	46	90
ENSG00000077152	UBE2T	0	2	1	0	1	0	0	2	0	61	18	19	4	3	6	8	17	10
ENSG00000077157	PPP1R12B	89	63	66	55	116	100	21	63	66	46	44	365	125	39	20	55	150	51
ENSG00000077232	DNAJC10	474	470	437	413	767	661	195	495	321	183	172	130	239	136	79	149	217	79
ENSG00000077235	GTF3C1	30	27	13	25	38	54	5	23	77	130	69	35	63	36	44	32	43	65
ENSG00000077238	IL4R	799	1058	1391	712	1016	610	339	769	1221	224	156	92	35	35	152	51	169	49
ENSG00000077254	USP33	150	166	152	120	312	232	69	206	269	178	188	172	224	174	114	216	257	84
ENSG00000077264	PAK3	2	0	0	0	0	1	0	0	0	0	0	0	2	0	0	0	0	0
ENSG00000077274	CAPN6	0	0	0	0	0	0	0	0	0	0	0	0	0	0	0	0	0	0
ENSG00000077279	DCX	0	0	0	0	0	0	0	1	1	0	0	0	0	0	0	0	0	0
ENSG00000077312	SNRPA	153	319	162	155	378	233	165	180	236	249	192	263	136	263	117	260	523	68
ENSG00000077327	SPAG6	0	0	0	0	0	0	0	0	0	3	0	0	1	3	0	1	0	0
ENSG00000077348	EXOSC5	18	40	41	44	56	52	6	44	55	49	20	33	30	43	11	49	46	8
ENSG00000077380	DYNC1I2	203	338	427	326	425	423	108	433	353	183	470	269	538	261	163	234	349	295
ENSG00000077420	APBB1IP	140	192	246	212	463	318	49	264	312	450	132	313	185	198	66	117	277	122
ENSG00000077454	LRCH4	294	447	289	220	668	446	215	367	381	237	213	215	180	266	233	195	525	99
ENSG00000077458	FAM76B	118	96	90	80	140	138	41	93	59	73	235	66	68	53	128	64	91	48
ENSG00000077463	SIRT6	20	68	40	30	113	61	30	46	30	69	39	42	45	63	4	52	114	11
ENSG00000077498	TYR	0	0	0	0	0	0	0	0	0	0	0	0	0	0	0	0	0	0
ENSG00000077514	POLD3	17	11	15	8	29	18	2	11	28	27	65	37	29	17	15	19	25	16
ENSG00000077522	ACTN2	0	0	0	0	0	0	0	0	0	0	0	0	0	0	0	0	0	0
ENSG00000077549	CAPZB	504	252	471	732	692	634	87	578	676	430	690	381	293	302	180	260	434	197
ENSG00000077585	GPR137B	3	0	3	0	2	5	5	7	0	3	1	0	1	4	5	3	1	1
ENSG00000077616	NAALAD2	0	0	0	0	0	0	1	0	0	0	0	0	0	0	0	0	0	0
ENSG00000077684	JADE1	100	219	216	139	278	149	39	147	138	162	114	148	46	93	43	143	102	27
ENSG00000077713	SLC25A43	5	3	6	13	8	7	0	12	4	20	0	13	7	4	0	1	8	1
ENSG00000077721	UBE2A	70	75	82	84	92	73	42	81	72	106	297	124	56	60	331	51	130	77
ENSG00000077782	FGFR1	5	7	5	3	6	2	6	9	11	97	244	66	6	53	52	74	24	44
ENSG00000077800	FKBP6	0	0	0	0	0	0	0	0	0	0	0	0	0	0	0	0	0	0
ENSG00000077935	SMC1B	0	0	1	0	1	2	0	0	0	10	0	12	4	0	20	0	8	0
ENSG00000077942	FBLN1	0	0	0	0	1	0	1	2	0	1	0	2	0	0	0	1	0	0
ENSG00000077943	ITGA8	1	0	1	0	0	0	0	0	0	0	2	0	0	0	0	0	0	0
ENSG00000077984	CST7	10	11	20	1	29	7	21	18	26	27	23	31	26	93	0	76	11	21
ENSG00000078018	MAP2	11	7	13	3	16	27	4	18	7	3	0	3	3	0	5	1	0	1
ENSG00000078043	PIAS2	91	131	121	73	172	111	60	81	43	112	182	132	227	73	148	150	135	86
ENSG00000078053	AMPH	1	0	0	0	0	0	0	0	0	0	0	0	0	0	0	0	0	1
ENSG00000078061	ARAF	59	96	80	67	122	75	51	66	101	37	177	122	64	105	61	58	110	63
ENSG00000078070	MCCC1	22	30	31	41	62	47	6	77	25	79	35	27	44	14	25	43	65	27
ENSG00000078081	LAMP3	0	0	0	0	0	0	0	0	3	0	0	0	0	4	0	0	0	0
ENSG00000078098	FAP	0	0	0	0	0	0	0	0	0	0	0	4	0	0	0	1	0	0
ENSG00000078114	NEBL	2	0	3	0	0	0	1	0	1	0	0	0	0	1	6	0	1	2
ENSG00000078124	ACER3	52	40	42	43	90	63	29	53	19	15	34	37	27	62	13	26	84	18
ENSG00000078140	UBE2K	121	73	107	121	194	171	40	134	168	109	185	181	173	113	167	141	182	88
ENSG00000078142	PIK3C3	123	99	110	89	149	135	55	79	95	212	111	86	453	86	36	97	92	80
ENSG00000078177	N4BP2	127	46	98	46	141	123	30	89	39	27	147	161	168	54	58	110	160	107
ENSG00000078237	TIGAR	6	2	2	6	19	10	3	8	14	4	19	5	4	2	26	0	16	2
ENSG00000078246	TULP3	24	43	37	19	63	37	32	45	13	19	21	21	24	12	3	20	40	10
ENSG00000078269	SYNJ2	35	23	36	17	48	24	73	34	55	20	61	97	144	34	139	38	119	71
ENSG00000078295	ADCY2	0	0	0	0	0	0	0	0	0	0	0	0	0	0	0	0	0	0
ENSG00000078304	PPP2R5C	411	235	276	270	382	346	169	290	333	182	553	330	262	131	211	131	474	301
ENSG00000078328	RBFOX1	0	0	0	0	0	0	0	0	0	0	0	0	0	0	0	0	0	0
ENSG00000078369	GNB1	365	421	462	463	884	523	327	626	575	696	874	495	412	550	496	416	1005	263
ENSG00000078399	HOXA9	0	1	0	0	1	0	0	1	1	0	0	1	0	2	0	0	0	0
ENSG00000078401	EDN1	7	2	21	12	11	11	4	4	6	6	3	3	4	0	1	1	0	9
ENSG00000078403	MLLT10	100	99	81	72	131	151	32	113	94	33	121	84	144	76	86	89	128	43
ENSG00000078487	ZCWPW1	183	227	234	117	222	199	148	109	180	111	62	102	43	101	68	57	48	34
ENSG00000078549	ADCYAP1R1	0	0	0	0	0	0	0	0	0	0	0	0	0	0	0	0	0	0
ENSG00000078579	FGF20	0	0	0	0	0	1	0	0	0	0	0	0	2	0	0	0	0	0
ENSG00000078589	P2RY10	25	17	30	30	39	38	21	38	34	2	12	10	1	4	13	0	4	0
ENSG00000078596	ITM2A	23	12	24	10	52	3	7	37	30	110	25	9	16	43	75	89	15	9
ENSG00000078618	NRD1	337	352	308	229	555	351	215	312	308	238	230	244	329	262	98	295	389	91
ENSG00000078668	VDAC3	40	66	73	84	184	65	20	76	53	218	77	241	77	146	51	133	264	47
ENSG00000078674	PCM1	596	463	549	507	781	752	318	611	301	296	1197	709	652	357	431	619	732	279
ENSG00000078687	TNRC6C	261	254	358	351	496	359	203	312	177	302	114	288	168	79	130	83	3	81
ENSG00000078699	CBFA2T2	74	71	77	82	144	114	34	82	71	67	21	21	72	68	6	58	49	28
ENSG00000078725	BRINP1	0	0	0	0	0	0	0	0	0	0	0	0	0	0	0	0	0	0
ENSG00000078747	ITCH	81	43	41	53	82	99	40	63	45	24	47	19	60	21	49	28	66	36
ENSG00000078795	PKD2L2	0	1	0	0	0	0	0	0	0	0	0	0	0	1	0	0	0	1
ENSG00000078804	TP53INP2	25	9	17	17	10	26	10	10	10	10	19	8	21	0	25	3	5	5
ENSG00000078808	SDF4	121	151	134	161	234	175	98	203	218	142	160	154	102	112	50	103	190	35
ENSG00000078814	MYH7B	2	1	1	0	0	2	0	2	1	2	0	0	4	0	0	1	0	0
ENSG00000078898	BPIFB2	0	0	0	0	0	0	0	0	0	0	0	0	0	1	0	1	0	0
ENSG00000078900	TP73	0	0	0	0	0	0	0	2	0	5	25	2	33	1	0	0	0	0
ENSG00000078902	TOLLIP	56	95	107	94	161	101	63	108	121	68	53	70	54	84	17	61	102	24
ENSG00000078967	UBE2D4	7	11	19	20	26	34	13	27	10	12	19	2	3	7	1	15	17	1
ENSG00000079101	CLUL1	0	0	0	0	0	0	0	0	0	0	0	0	0	0	0	0	0	0
ENSG00000079102	RUNX1T1	0	0	1	0	0	0	0	2	0	1	0	1	0	0	0	0	0	0
ENSG00000079112	CDH17	0	0	0	0	0	0	0	0	0	0	0	0	0	0	0	0	0	0
ENSG00000079134	THOC1	91	45	70	40	65	93	23	35	40	35	174	57	122	26	111	48	59	66
ENSG00000079150	FKBP7	0	1	1	1	0	0	0	0	5	2	2	2	5	3	0	3	4	2
ENSG00000079156	OSBPL6	0	0	0	0	0	0	0	0	0	1	0	1	0	1	0	2	0	0
ENSG00000079215	SLC1A3	0	0	0	0	0	0	0	0	0	0	9	1	0	3	3	5	6	7
ENSG00000079246	XRCC5	240	363	387	164	706	363	118	333	409	623	610	536	373	401	326	437	725	233
ENSG00000079257	LXN	0	0	1	0	3	1	0	2	1	18	2	8	6	6	1	27	4	3
ENSG00000079263	SP140	767	743	802	583	926	1204	227	811	1080	11	148	12	54	47	2	11	37	75
ENSG00000079277	MKNK1	49	65	74	75	103	66	22	82	54	56	74	77	85	131	49	213	108	45
ENSG00000079308	TNS1	12	1	7	1	16	1	2	3	3	372	21	20	36	24	17	45	4	3
ENSG00000079313	REXO1	50	37	41	20	63	42	45	15	38	72	30	18	38	38	19	16	59	17
ENSG00000079332	SAR1A	104	124	119	91	128	98	123	114	49	146	324	156	133	99	511	80	270	82
ENSG00000079335	CDC14A	19	17	11	3	23	13	1	8	19	7	27	9	10	5	8	7	12	6
ENSG00000079337	RAPGEF3	1	4	3	0	6	4	9	3	6	17	25	15	21	66	6	146	31	14
ENSG00000079385	CEACAM1	4	4	4	6	20	8	3	18	13	4	0	1	30	4	1	6	3	0
ENSG00000079387	SENP1	29	48	33	23	75	70	18	52	50	32	74	59	39	36	41	24	40	20
ENSG00000079393	DUSP13	0	0	0	0	1	0	0	1	4	1	0	0	0	1	0	0	0	0
ENSG00000079432	CIC	217	320	222	200	460	261	457	182	227	267	182	458	179	366	102	286	372	57
ENSG00000079435	LIPE	15	36	36	23	67	41	11	48	65	40	8	3	3	1	3	1	9	0
ENSG00000079459	FDFT1	60	135	123	91	234	107	70	140	116	118	126	134	106	171	67	131	227	43
ENSG00000079462	PAFAH1B3	55	76	86	47	157	94	61	77	81	146	68	85	102	141	52	74	155	27
ENSG00000079482	OPHN1	1	0	1	0	1	0	0	4	0	0	0	7	0	4	0	5	2	2
ENSG00000079557	AFM	0	0	0	0	0	0	0	0	0	0	0	0	0	0	0	0	0	0
ENSG00000079616	KIF22	13	32	40	36	85	41	19	30	35	151	151	97	37	62	73	62	154	23
ENSG00000079689	SCGN	0	0	0	0	0	0	0	0	0	0	0	0	0	0	0	0	0	0
ENSG00000079691	LRRC16A	37	34	52	6	27	19	8	46	87	1	1	1	2	3	0	33	1	3
ENSG00000079739	PGM1	7	11	20	22	23	18	9	15	22	33	22	25	4	8	6	4	13	9
ENSG00000079785	DDX1	76	99	109	94	180	142	19	110	131	65	342	141	177	64	119	87	189	79
ENSG00000079805	DNM2	327	379	395	303	637	395	197	471	455	490	366	421	302	283	290	331	682	131
ENSG00000079819	EPB41L2	106	119	239	200	233	187	21	186	243	139	187	75	1	139	411	77	211	83
ENSG00000079841	RIMS1	0	0	0	0	0	0	0	0	0	0	0	0	0	0	0	0	0	0
ENSG00000079931	MOXD1	0	2	7	3	5	3	2	0	0	0	0	0	6	0	0	0	1	2
ENSG00000079950	STX7	199	597	684	538	1253	955	141	489	286	159	108	154	98	217	47	194	170	51
ENSG00000079974	RABL2B	129	347	207	236	358	268	96	304	178	269	151	138	81	184	29	191	281	31
ENSG00000079999	KEAP1	6	10	14	5	28	21	3	10	14	94	35	55	35	53	18	56	84	8
ENSG00000080007	DDX43	0	0	2	2	3	3	1	1	0	0	0	0	0	0	0	1	0	0
ENSG00000080031	PTPRH	0	0	0	0	0	0	0	0	0	0	0	0	0	1	0	1	0	0
ENSG00000080166	DCT	0	0	1	0	0	0	0	0	0	0	1	0	0	0	0	0	0	0
ENSG00000080189	SLC35C2	78	165	140	131	252	140	77	116	108	84	22	42	98	143	1	134	135	29
ENSG00000080200	CRYBG3	34	18	16	17	46	73	13	43	37	0	0	15	1	16	4	21	16	4
ENSG00000080224	EPHA6	0	0	0	0	0	0	0	0	0	0	0	0	0	0	0	0	0	0
ENSG00000080293	SCTR	0	0	0	0	0	0	0	0	0	0	0	0	0	0	0	0	0	0
ENSG00000080298	RFX3	106	41	51	57	98	76	25	54	50	26	15	31	41	22	35	41	37	16
ENSG00000080345	RIF1	350	306	366	294	494	448	140	347	152	122	796	454	478	223	416	334	486	232
ENSG00000080371	RAB21	158	66	122	81	129	87	230	107	96	107	120	85	67	57	277	75	65	39
ENSG00000080493	SLC4A4	0	0	1	0	2	1	0	0	0	2	0	0	3	0	0	0	0	0
ENSG00000080503	SMARCA2	517	482	512	397	590	604	176	495	569	247	285	411	832	329	197	619	783	437
ENSG00000080511	RDH8	0	0	0	0	0	0	0	0	0	0	0	0	0	0	0	0	0	0
ENSG00000080546	SESN1	72	97	123	57	80	38	37	26	109	156	43	25	74	51	102	647	369	82
ENSG00000080561	MID2	0	0	0	0	0	0	0	0	0	0	0	0	0	0	0	0	0	0
ENSG00000080572	PIH1D3	0	0	0	0	0	0	0	0	0	0	0	0	0	0	0	0	0	0
ENSG00000080573	COL5A3	0	0	0	0	0	0	0	0	0	2	0	4	1	0	0	6	0	0
ENSG00000080603	SRCAP	15	31	20	24	43	11	26	15	7	9	20	13	9	6	24	26	26	9
ENSG00000080608	KIAA0020	203	194	186	175	247	255	77	185	162	50	205	164	218	105	158	158	316	155
ENSG00000080618	CPB2	0	0	0	0	0	0	0	0	0	0	0	0	0	0	0	0	0	0
ENSG00000080644	CHRNA3	0	0	0	0	0	0	0	0	0	0	0	0	0	0	10	0	0	0
ENSG00000080709	KCNN2	0	0	0	0	0	0	0	0	0	0	0	0	0	0	0	0	0	0
ENSG00000080802	CNOT4	98	84	138	81	104	102	36	79	59	42	94	64	67	44	108	48	56	42
ENSG00000080815	PSEN1	57	51	67	70	105	86	67	75	52	149	66	128	44	112	23	98	103	50
ENSG00000080819	CPOX	2	0	6	5	12	8	1	4	9	46	9	8	6	5	2	17	5	1
ENSG00000080822	CLDND1	19	9	16	24	34	24	8	16	13	56	33	17	23	15	37	25	27	22
ENSG00000080823	MOK	3	3	5	0	6	3	5	2	9	5	25	5	17	84	18	35	9	3
ENSG00000080824	HSP90AA1	3840	3332	3670	2730	4850	3171	3179	4099	2028	2000	5657	5946	3353	4195	6722	3516	4788	6789
ENSG00000080839	RBL1	15	31	32	31	61	34	6	16	36	41	56	49	33	62	34	41	93	20
ENSG00000080845	DLGAP4	76	207	83	65	251	118	165	50	98	60	22	26	46	153	89	134	148	21
ENSG00000080854	IGSF9B	0	0	0	0	0	0	0	0	0	2	0	0	0	0	0	0	0	0
ENSG00000080910	CFHR2	0	0	0	0	0	0	0	0	0	0	0	0	0	0	0	0	0	0
ENSG00000080986	NDC80	45	3	12	10	15	26	11	11	11	46	116	42	25	24	71	35	54	31
ENSG00000081014	AP4E1	26	21	22	15	45	25	4	28	14	33	36	19	17	11	21	18	27	16
ENSG00000081019	RSBN1	171	184	235	210	249	247	82	265	153	238	230	170	144	137	131	162	128	124
ENSG00000081026	MAGI3	4	0	2	6	6	2	2	0	1	11	4	29	5	1	3	1	3	19
ENSG00000081041	CXCL2	3	0	4	0	3	0	1	5	6	0	2	0	14	0	1	4	0	0
ENSG00000081051	AFP	0	0	0	0	0	0	0	0	0	0	0	0	0	0	0	0	0	0
ENSG00000081052	COL4A4	0	0	0	0	0	0	0	0	0	0	0	0	0	0	0	0	0	0
ENSG00000081059	TCF7	77	17	72	19	169	18	33	58	68	237	365	86	57	20	13	14	4	47
ENSG00000081087	OSTM1	31	45	48	35	78	53	17	37	47	22	12	18	22	43	11	9	31	7
ENSG00000081138	CDH7	0	0	0	0	0	0	0	0	0	0	0	0	1	0	0	0	0	0
ENSG00000081148	IMPG2	1	1	2	1	2	2	2	2	0	0	0	1	2	0	1	0	2	0
ENSG00000081154	PCNP	120	90	103	154	199	142	77	111	87	145	199	104	99	94	147	129	175	50
ENSG00000081177	EXD2	5	2	3	3	6	5	0	10	4	1	13	16	8	10	2	9	0	6
ENSG00000081181	ARG2	1	1	0	0	2	0	0	3	1	4	0	0	0	0	5	3	0	0
ENSG00000081189	MEF2C	840	579	893	490	1026	1272	264	754	1127	595	1906	1092	672	319	922	348	1131	1304
ENSG00000081237	PTPRC	2778	2565	2404	1748	4455	3940	1496	2640	2559	255	1098	219	765	635	1420	461	1407	125
ENSG00000081248	CACNA1S	0	2	0	0	1	0	0	0	0	0	0	0	0	0	0	0	0	0
ENSG00000081277	PKP1	0	0	0	0	0	0	0	0	0	0	0	0	0	0	0	0	0	0
ENSG00000081307	UBA5	25	33	25	31	59	34	11	23	20	37	47	27	31	20	18	38	75	17
ENSG00000081320	STK17B	435	225	403	284	405	431	74	368	472	148	547	228	939	178	455	169	557	184
ENSG00000081377	CDC14B	3	0	1	2	6	0	0	0	0	1	0	0	24	0	0	0	1	0
ENSG00000081386	ZNF510	8	13	6	8	14	14	1	4	6	14	18	8	8	2	5	11	16	6
ENSG00000081479	LRP2	0	0	0	0	0	0	0	0	0	0	0	0	0	0	0	1	0	0
ENSG00000081665	ZNF506	37	15	29	11	45	24	8	36	21	15	42	20	20	13	27	12	20	7
ENSG00000081692	JMJD4	13	62	43	31	91	37	10	43	42	27	15	34	35	44	17	54	49	7
ENSG00000081721	DUSP12	3	7	13	11	11	4	3	10	11	51	9	15	5	11	22	12	20	5
ENSG00000081760	AACS	29	12	26	5	34	33	20	14	16	0	12	14	27	32	15	30	74	7
ENSG00000081791	KIAA0141	133	212	166	152	345	193	115	188	195	168	92	130	125	216	57	175	294	30
ENSG00000081800	SLC13A1	0	0	0	0	0	0	0	0	0	0	0	0	0	0	0	0	0	0
ENSG00000081803	CADPS2	0	0	0	0	0	0	0	0	0	0	0	0	0	0	0	0	0	0
ENSG00000081818	PCDHB4	0	0	0	0	0	0	0	0	0	0	0	0	0	0	0	0	0	0
ENSG00000081842	PCDHA6	0	0	0	0	0	0	0	0	0	0	0	0	0	0	0	0	0	0
ENSG00000081853	PCDHGA2	0	0	0	0	0	0	0	0	0	1	0	1	0	0	0	0	0	0
ENSG00000081870	HSPB11	21	22	15	29	48	19	2	25	21	101	58	41	37	57	23	42	46	12
ENSG00000081913	PHLPP1	62	52	29	36	82	94	70	50	67	79	109	115	150	82	106	88	97	60
ENSG00000081923	ATP8B1	0	1	0	0	0	0	0	0	0	0	0	0	0	0	0	0	2	1
ENSG00000081985	IL12RB2	1	0	2	0	0	0	0	0	0	1	0	0	0	0	0	2	5	1
ENSG00000082014	SMARCD3	5	2	4	1	25	1	1	8	19	11	11	4	0	1	0	3	3	0
ENSG00000082068	WDR70	140	77	147	75	112	190	26	123	181	35	160	80	234	40	74	63	77	131
ENSG00000082074	FYB	259	41	209	60	394	125	41	250	178	508	130	416	2978	212	12	100	30	73
ENSG00000082126	MPP4	0	0	0	0	0	0	0	0	0	0	0	0	0	0	0	0	0	0
ENSG00000082146	STRADB	8	17	32	12	36	14	8	15	15	35	7	16	21	12	1	31	6	5
ENSG00000082153	BZW1	253	118	114	101	162	184	91	152	149	51	378	121	173	63	444	93	173	80
ENSG00000082175	PGR	0	0	0	0	0	0	0	0	0	0	0	0	0	0	0	0	0	0
ENSG00000082196	C1QTNF3	18	11	10	11	14	9	7	10	4	31	7	8	15	10	2	14	9	1
ENSG00000082212	ME2	47	46	51	52	81	58	14	50	55	32	21	54	37	28	27	30	90	16
ENSG00000082213	C5orf22	1	6	15	11	23	10	3	11	12	13	11	1	6	16	1	14	15	5
ENSG00000082258	CCNT2	100	53	64	59	102	101	23	78	34	98	182	47	73	33	81	66	87	33
ENSG00000082269	FAM135A	37	33	33	47	77	55	17	46	11	29	25	54	27	35	2	21	31	17
ENSG00000082293	COL19A1	131	74	91	54	104	184	55	97	149	1	2	1	0	0	0	0	0	0
ENSG00000082397	EPB41L3	12	0	2	2	7	0	0	5	0	0	2	16	1	1	1	0	4	0
ENSG00000082438	COBLL1	191	130	131	149	230	182	69	189	114	11	9	6	0	7	3	24	36	1
ENSG00000082458	DLG3	5	6	6	1	7	0	1	0	4	68	102	90	23	18	4	20	5	25
ENSG00000082482	KCNK2	0	0	0	0	0	0	0	0	0	0	0	0	0	0	0	0	0	0
ENSG00000082497	SERTAD4	0	0	0	0	0	0	0	0	0	0	0	1	0	0	0	0	0	0
ENSG00000082512	TRAF5	359	649	593	513	885	649	275	474	288	387	81	20	89	124	25	175	91	16
ENSG00000082515	MRPL22	15	21	22	24	47	23	4	24	13	83	88	42	18	36	43	42	76	23
ENSG00000082516	GEMIN5	15	20	27	12	49	28	1	37	15	25	11	23	19	21	9	19	27	1
ENSG00000082556	OPRK1	0	0	0	0	0	0	0	0	0	0	0	0	0	0	0	0	4	0
ENSG00000082641	NFE2L1	24	44	55	34	96	59	20	39	65	52	71	37	27	48	31	48	72	21
ENSG00000082684	SEMA5B	0	0	0	0	0	0	0	0	0	0	0	0	0	0	0	0	0	0
ENSG00000082701	GSK3B	76	71	97	80	153	125	40	93	104	117	68	67	79	82	5	95	115	41
ENSG00000082781	ITGB5	13	1	2	2	16	4	6	18	1	0	0	2	0	10	0	1	12	0
ENSG00000082805	ERC1	196	118	167	84	199	234	69	129	197	26	209	129	259	56	182	85	169	163
ENSG00000082898	XPO1	85	135	126	106	180	153	38	140	87	145	174	183	126	135	60	169	229	87
ENSG00000082996	RNF13	70	67	84	101	144	119	32	95	44	7	8	20	17	32	3	41	55	12
ENSG00000083067	TRPM3	0	1	0	0	0	0	0	0	0	0	0	0	0	0	0	0	0	1
ENSG00000083093	PALB2	6	8	6	4	7	8	1	6	2	14	9	3	6	8	3	7	1	4
ENSG00000083097	DOPEY1	24	17	26	31	40	57	30	35	35	15	26	38	42	8	8	28	19	25
ENSG00000083099	LYRM2	48	72	107	65	75	63	21	70	58	43	135	127	59	70	68	54	68	87
ENSG00000083123	BCKDHB	6	1	6	5	6	4	4	6	14	7	5	7	1	4	0	5	3	1
ENSG00000083168	KAT6A	652	562	656	567	811	694	483	556	502	559	1247	929	589	356	1029	545	521	438
ENSG00000083223	ZCCHC6	340	215	316	224	365	348	85	354	235	44	236	97	164	93	448	72	172	130
ENSG00000083290	ULK2	5	1	4	11	10	5	1	5	3	20	3	15	6	10	2	3	0	0
ENSG00000083307	GRHL2	0	0	0	0	0	0	0	0	0	0	0	0	0	0	0	0	0	0
ENSG00000083312	TNPO1	475	414	369	200	536	525	301	466	413	140	691	379	332	175	309	140	393	132
ENSG00000083444	PLOD1	10	20	12	17	25	10	9	29	16	6	4	13	18	36	0	13	46	4
ENSG00000083454	P2RX5	1719	2550	2022	1260	2192	1237	1140	1580	1857	125	123	104	1339	145	7	346	1096	89
ENSG00000083457	ITGAE	74	40	57	70	101	54	28	52	76	82	68	22	196	11	31	26	65	41
ENSG00000083520	DIS3	128	109	111	48	186	138	128	87	51	82	194	104	85	77	238	104	219	56
ENSG00000083535	PIBF1	45	33	40	30	83	75	21	38	55	10	34	35	50	13	59	29	29	21
ENSG00000083544	TDRD3	58	49	45	38	68	57	19	39	16	36	15	39	34	16	29	36	58	22
ENSG00000083622	AC000061.1	0	0	0	0	0	0	0	0	0	0	0	0	0	0	0	0	0	0
ENSG00000083635	NUFIP1	7	24	27	19	44	33	4	41	15	68	63	37	28	36	164	32	68	16
ENSG00000083642	PDS5B	381	193	233	164	271	351	88	290	178	70	584	212	335	84	290	180	270	229
ENSG00000083720	OXCT1	23	18	17	19	31	29	8	26	50	17	54	22	12	12	7	13	15	10
ENSG00000083750	RRAGB	21	8	18	11	14	15	2	15	16	24	61	35	31	6	9	13	27	30
ENSG00000083782	EPYC	0	0	0	0	0	0	0	0	0	0	0	0	0	0	0	0	0	0
ENSG00000083799	CYLD	344	302	317	322	548	333	380	363	225	148	636	187	167	314	360	173	243	110
ENSG00000083807	SLC27A5	16	17	22	9	42	35	22	12	25	7	7	18	16	29	3	29	12	1
ENSG00000083812	ZNF324	24	22	24	14	40	17	24	24	13	6	19	35	29	29	18	18	21	8
ENSG00000083814	ZNF671	7	34	36	16	56	24	12	23	24	50	11	19	12	27	11	29	21	6
ENSG00000083817	ZNF416	1	1	3	1	4	4	2	0	0	5	7	5	1	2	3	1	9	1
ENSG00000083828	ZNF586	35	30	50	8	65	38	9	35	11	22	27	15	20	23	34	30	50	8
ENSG00000083838	ZNF446	10	23	20	21	20	14	2	16	23	18	16	16	19	8	6	8	25	7
ENSG00000083844	ZNF264	82	94	91	71	143	147	45	95	88	153	69	72	59	55	37	72	75	40
ENSG00000083845	RPS5	3297	7105	5079	4956	9247	5943	3210	6192	7829	2303	3647	2576	2086	3059	3678	2858	7033	1543
ENSG00000083857	FAT1	3	0	0	0	0	0	0	0	0	8	0	0	0	0	0	1	0	0
ENSG00000083896	YTHDC1	775	486	563	513	612	628	430	655	419	203	1040	511	597	187	2365	249	519	517
ENSG00000083937	CHMP2B	64	71	74	103	156	91	37	83	85	56	146	77	34	46	27	83	59	36
ENSG00000084070	SMAP2	1082	732	1115	613	904	571	742	554	1456	286	443	211	358	190	253	518	529	839
ENSG00000084072	PPIE	53	65	64	29	144	56	75	59	55	82	38	58	16	71	27	56	101	4
ENSG00000084073	ZMPSTE24	12	31	29	9	41	20	6	20	9	27	59	39	17	37	21	35	79	9
ENSG00000084090	STARD7	110	275	323	361	571	293	122	332	326	592	441	338	206	472	177	340	468	98
ENSG00000084092	NOA1	29	37	46	48	71	43	7	51	73	44	45	37	23	19	68	41	57	27
ENSG00000084093	REST	327	294	409	220	504	439	92	336	346	63	705	344	367	168	216	229	312	199
ENSG00000084110	HAL	5	12	12	6	23	10	1	4	18	14	2	7	23	8	0	19	2	0
ENSG00000084112	SSH1	90	54	59	48	124	90	34	54	68	45	38	35	80	49	23	41	55	17
ENSG00000084207	GSTP1	612	1014	485	593	1353	756	497	940	1354	934	2487	1756	1084	3675	657	1338	2991	591
ENSG00000084234	APLP2	828	767	1152	904	1440	1022	314	1264	1507	435	851	222	261	389	190	336	1118	192
ENSG00000084444	FAM234B	4	8	12	10	17	17	2	11	7	12	16	7	4	9	3	11	10	1
ENSG00000084453	SLCO1A2	0	0	0	0	0	0	0	0	0	0	0	0	0	0	0	0	0	0
ENSG00000084463	WBP11	236	89	115	129	142	236	81	130	195	69	374	150	92	58	799	87	149	153
ENSG00000084623	EIF3I	117	200	240	211	362	211	114	226	210	181	253	158	152	219	269	209	445	103
ENSG00000084628	NKAIN1	0	0	0	0	0	0	0	0	0	1	0	0	3	0	0	0	1	0
ENSG00000084636	COL16A1	0	0	0	0	0	0	1	0	0	0	0	1	0	0	0	0	0	0
ENSG00000084652	TXLNA	47	47	54	34	90	75	13	59	105	85	66	48	74	47	23	38	41	12
ENSG00000084674	APOB	0	0	0	0	0	0	0	0	0	0	0	2	0	0	0	1	0	0
ENSG00000084676	NCOA1	133	74	104	129	202	137	67	134	134	69	122	95	140	105	47	100	39	51
ENSG00000084693	AGBL5	42	28	24	30	33	15	79	28	8	87	43	42	47	49	19	64	61	16
ENSG00000084710	EFR3B	0	0	0	2	0	0	0	0	0	3	3	1	41	24	3	4	0	0
ENSG00000084731	KIF3C	7	2	6	6	7	7	1	4	10	18	4	8	9	6	0	15	20	4
ENSG00000084733	RAB10	49	54	63	59	152	81	26	74	69	95	28	58	98	94	42	87	134	14
ENSG00000084734	GCKR	0	0	0	0	0	0	0	0	0	0	0	0	0	0	0	0	0	0
ENSG00000084754	HADHA	379	401	532	339	661	546	239	461	666	251	468	321	322	298	232	336	662	251
ENSG00000084764	MAPRE3	0	0	5	1	4	3	2	0	1	0	0	0	2	0	0	1	0	0
ENSG00000084774	CAD	20	56	65	44	116	68	29	59	23	70	48	71	35	73	13	50	111	7
ENSG00000085063	CD59	6	2	12	8	22	10	4	20	8	140	89	96	31	120	20	192	5	8
ENSG00000085117	CD82	237	389	272	280	476	514	207	306	583	33	376	203	154	207	156	150	194	134
ENSG00000085185	BCORL1	15	33	18	12	55	20	21	33	26	52	9	48	33	61	15	52	18	17
ENSG00000085224	ATRX	1099	821	1067	934	1401	1306	407	1131	643	313	1248	1174	1008	346	559	569	751	1105
ENSG00000085231	AK6	13	15	17	10	54	21	11	27	14	82	21	41	12	41	34	55	44	5
ENSG00000085265	FCN1	198	62	124	38	847	116	14	238	416	120	23	36	7	326	1	210	29	4
ENSG00000085274	MYNN	14	23	21	13	34	27	12	30	6	22	15	16	15	7	33	17	18	3
ENSG00000085276	MECOM	0	1	0	0	1	2	1	0	2	3	0	0	2	3	0	13	0	1
ENSG00000085365	SCAMP1	55	61	79	48	110	58	30	55	54	91	66	85	26	62	32	75	97	24
ENSG00000085377	PREP	10	21	29	32	37	41	5	38	12	46	38	31	24	25	8	16	64	5
ENSG00000085382	HACE1	10	5	6	5	10	11	3	6	7	29	5	17	15	4	8	12	40	9
ENSG00000085415	SEH1L	37	30	26	30	44	41	33	29	8	53	51	44	53	27	19	27	79	24
ENSG00000085433	WDR47	14	23	6	19	25	15	10	23	15	10	30	20	30	21	56	24	23	6
ENSG00000085449	WDFY1	9	3	21	12	33	14	5	10	11	21	55	23	10	14	33	11	14	18
ENSG00000085465	OVGP1	11	16	17	4	19	6	6	10	2	0	3	1	4	1	3	3	10	2
ENSG00000085491	SLC25A24	22	20	35	36	55	54	9	58	53	41	76	23	39	27	22	33	100	13
ENSG00000085511	MAP3K4	95	64	77	67	139	105	34	93	75	81	99	71	93	44	45	42	138	53
ENSG00000085514	PILRA	11	4	15	4	26	14	0	11	12	32	28	11	5	14	7	13	7	6
ENSG00000085552	IGSF9	0	0	0	0	1	1	0	0	0	2	2	0	0	5	0	0	0	1
ENSG00000085563	ABCB1	14	15	14	3	23	10	5	13	15	1	9	3	3	0	0	10	0	4
ENSG00000085644	ZNF213	4	21	16	21	33	12	2	20	13	36	18	17	8	23	2	19	27	3
ENSG00000085662	AKR1B1	45	55	58	72	156	65	21	74	91	183	131	144	59	148	41	85	240	56
ENSG00000085719	CPNE3	58	48	43	34	104	73	23	55	58	96	117	149	57	125	19	97	228	43
ENSG00000085721	RRN3	19	16	28	36	86	43	4	26	23	202	200	66	41	29	186	42	70	51
ENSG00000085733	CTTN	13	1	2	4	16	2	2	20	1	6	7	7	1	0	0	2	0	0
ENSG00000085741	WNT11	0	0	0	0	1	0	4	0	0	0	0	0	0	0	1	0	0	1
ENSG00000085760	MTIF2	87	84	87	57	126	111	32	79	79	52	73	46	102	40	32	41	108	30
ENSG00000085788	DDHD2	28	27	41	61	69	49	13	36	38	30	37	23	23	15	13	19	38	12
ENSG00000085831	TTC39A	0	0	0	0	0	0	0	0	0	3	0	0	1	1	0	1	0	2
ENSG00000085832	EPS15	108	113	120	121	198	141	52	132	158	148	183	112	130	109	111	153	193	64
ENSG00000085840	ORC1	2	0	2	2	3	2	1	0	2	20	22	7	5	7	16	5	15	4
ENSG00000085871	MGST2	1	2	7	2	10	1	1	6	11	119	49	49	9	67	19	86	52	25
ENSG00000085872	CHERP	60	90	78	52	159	78	41	87	56	138	110	133	90	50	238	77	107	24
ENSG00000085978	ATG16L1	33	18	33	36	55	36	1	49	27	46	69	20	37	16	36	14	28	21
ENSG00000085982	USP40	96	109	118	61	168	107	78	92	56	19	29	93	48	111	23	107	130	15
ENSG00000085998	POMGNT1	12	13	29	13	41	30	3	30	19	49	11	4	21	27	6	29	30	10
ENSG00000085999	RAD54L	0	0	0	0	0	1	0	0	0	19	3	3	1	2	2	5	0	1
ENSG00000086015	MAST2	25	12	20	14	28	23	29	15	25	8	19	9	11	20	5	27	65	7
ENSG00000086061	DNAJA1	322	212	343	247	254	223	215	306	227	312	182	189	104	192	794	121	207	131
ENSG00000086062	B4GALT1	616	679	482	923	868	588	263	983	684	243	730	336	293	155	2679	159	360	343
ENSG00000086065	CHMP5	13	8	20	37	65	27	0	20	21	137	28	44	29	68	96	38	25	32
ENSG00000086102	NFX1	243	180	224	169	285	217	162	209	146	113	254	152	125	93	121	141	186	85
ENSG00000086159	AQP6	0	0	0	0	0	0	0	0	0	1	0	0	0	1	0	1	0	0
ENSG00000086189	DIMT1	12	24	33	35	39	24	13	18	20	25	39	39	12	32	17	28	39	1
ENSG00000086200	IPO11	30	29	23	14	27	30	14	29	4	41	27	24	35	60	14	86	56	13
ENSG00000086205	FOLH1	0	0	0	0	0	0	0	0	0	0	0	0	0	0	0	0	0	0
ENSG00000086232	EIF2AK1	188	120	136	155	246	190	43	189	251	392	261	155	102	128	86	199	189	95
ENSG00000086288	NME8	2	1	3	0	3	0	1	5	2	0	0	0	1	7	1	4	0	0
ENSG00000086289	EPDR1	0	1	0	0	4	0	4	0	1	22	4	20	8	39	3	18	12	2
ENSG00000086300	SNX10	281	335	347	216	417	306	196	311	291	11	6	15	8	100	0	53	11	6
ENSG00000086475	SEPHS1	26	47	42	38	97	65	12	40	35	221	104	119	40	61	78	57	97	27
ENSG00000086504	MRPL28	15	29	34	15	39	48	22	41	20	13	23	31	40	54	9	29	62	12
ENSG00000086506	HBQ1	3	0	2	4	4	0	3	1	5	19	0	11	4	2	0	14	1	0
ENSG00000086544	ITPKC	6	18	17	14	35	19	12	15	19	14	5	4	8	11	3	10	5	3
ENSG00000086548	CEACAM6	0	1	0	0	10	9	0	5	0	0	29	29	0	16	0	32	797	1
ENSG00000086570	FAT2	0	1	0	0	0	0	0	0	0	0	0	0	0	0	0	0	0	0
ENSG00000086589	RBM22	171	190	154	111	227	192	76	192	190	152	344	148	298	133	534	175	255	97
ENSG00000086598	TMED2	89	65	87	49	122	101	34	94	79	125	141	104	82	127	116	117	179	48
ENSG00000086619	ERO1B	130	95	74	69	105	137	104	104	58	49	303	100	185	72	119	97	130	42
ENSG00000086666	ZFAND6	86	76	92	83	175	109	49	85	60	88	194	51	88	49	67	60	98	44
ENSG00000086696	HSD17B2	0	1	0	0	0	1	0	0	0	0	0	0	0	0	0	0	0	0
ENSG00000086712	TXLNG	78	51	72	83	102	86	30	66	54	11	215	94	40	26	245	33	42	85
ENSG00000086717	PPEF1	1	1	0	0	3	0	0	0	2	0	0	0	0	0	0	0	0	0
ENSG00000086730	LAT2	153	350	395	355	802	408	168	435	370	394	971	1547	573	1196	143	964	2203	334
ENSG00000086758	HUWE1	291	449	365	226	611	398	424	316	449	246	559	675	274	333	288	349	533	312
ENSG00000086827	ZW10	5	29	12	22	33	24	6	28	39	32	19	29	19	23	16	32	54	5
ENSG00000086848	ALG9	21	9	12	7	17	17	9	21	19	12	29	10	11	6	11	12	18	12
ENSG00000086967	MYBPC2	27	45	23	27	49	67	41	34	21	1	50	73	11	0	29	5	5	46
ENSG00000086991	NOX4	0	0	0	0	0	0	0	0	0	0	0	0	0	0	0	0	0	0
ENSG00000087008	ACOX3	26	60	31	24	69	53	32	31	44	29	12	38	53	56	9	38	58	4
ENSG00000087053	MTMR2	12	17	12	15	31	15	8	36	17	29	16	29	20	23	23	44	35	7
ENSG00000087074	PPP1R15A	572	317	411	643	554	527	194	710	715	247	497	252	274	130	1841	132	246	282
ENSG00000087076	HSD17B14	1	1	0	0	1	0	0	0	0	2	0	0	2	0	0	2	0	0
ENSG00000087077	TRIP6	3	6	5	10	12	8	3	12	6	97	12	56	3	34	48	73	120	24
ENSG00000087085	ACHE	0	1	0	0	0	0	7	0	0	26	1	5	2	2	6	19	0	0
ENSG00000087086	FTL	1750	2144	1912	1645	4187	1939	1618	2236	2923	1119	1242	1275	859	2075	1873	1663	1295	521
ENSG00000087087	SRRT	352	302	335	287	500	428	181	480	414	406	696	360	296	276	963	260	612	242
ENSG00000087088	BAX	79	78	78	52	119	102	91	74	85	25	64	61	64	81	22	51	129	28
ENSG00000087095	NLK	50	83	53	49	152	58	47	49	45	38	17	54	31	64	25	53	54	9
ENSG00000087111	PIGS	88	201	141	140	352	191	98	111	159	197	148	236	77	262	80	152	316	66
ENSG00000087116	ADAMTS2	0	0	1	0	0	0	0	0	0	0	0	0	1	0	0	1	0	0
ENSG00000087128	TMPRSS11E	0	0	0	0	0	0	0	0	0	4	0	0	0	0	0	0	0	0
ENSG00000087152	ATXN7L3	180	297	175	281	559	275	221	316	230	267	288	266	112	223	117	210	465	70
ENSG00000087157	PGS1	13	21	29	31	61	28	6	34	18	89	27	18	15	53	24	15	24	12
ENSG00000087191	PSMC5	128	285	226	162	447	274	124	254	216	312	314	370	187	333	204	221	570	140
ENSG00000087206	UIMC1	276	135	76	130	220	278	60	173	235	100	352	85	167	23	124	31	78	103
ENSG00000087237	CETP	0	15	10	9	9	4	4	6	0	0	3	3	0	17	0	5	18	1
ENSG00000087245	MMP2	0	0	0	0	1	2	1	0	0	1	0	0	36	1	0	0	0	0
ENSG00000087250	MT3	0	0	0	0	0	0	0	0	0	0	0	0	0	0	0	0	0	0
ENSG00000087253	LPCAT2	4	4	3	5	3	7	1	8	3	29	26	15	82	16	0	16	1	9
ENSG00000087258	GNAO1	3	0	0	0	5	0	0	1	0	0	6	0	1	2	1	0	2	0
ENSG00000087263	OGFOD1	34	50	62	24	109	97	10	56	98	30	75	64	89	46	85	45	97	31
ENSG00000087266	SH3BP2	152	271	236	163	354	229	147	189	183	114	681	533	541	322	36	414	557	323
ENSG00000087269	NOP14	130	164	145	113	292	198	50	173	153	129	273	245	200	126	194	146	346	124
ENSG00000087274	ADD1	247	261	366	451	632	450	136	374	243	386	184	235	229	184	97	142	280	98
ENSG00000087299	L2HGDH	16	15	18	8	20	22	3	13	14	4	3	15	14	3	2	6	11	1
ENSG00000087301	TXNDC16	22	14	12	16	18	23	9	24	20	6	21	30	31	4	24	10	17	18
ENSG00000087302	C14orf166	108	172	167	123	263	163	75	152	119	230	238	216	142	160	196	215	285	101
ENSG00000087303	NID2	0	0	0	0	1	0	0	0	0	0	0	0	2	1	0	1	0	0
ENSG00000087338	GMCL1	113	146	156	158	231	151	40	148	136	97	89	94	84	46	51	81	66	27
ENSG00000087365	SF3B2	385	481	414	271	763	552	168	451	836	310	704	451	454	425	339	393	654	267
ENSG00000087448	KLHL42	44	72	113	103	107	100	29	87	44	117	139	59	76	64	38	40	113	22
ENSG00000087460	GNAS	1165	584	651	953	1302	1030	375	937	732	1530	1060	277	831	450	2131	588	1153	671
ENSG00000087470	DNM1L	137	125	120	91	149	154	62	94	55	77	257	148	160	112	293	116	272	84
ENSG00000087494	PTHLH	0	0	0	0	0	0	0	0	0	0	0	0	1	0	0	0	0	0
ENSG00000087495	PHACTR3	0	0	0	0	0	0	0	4	0	0	0	0	0	0	0	0	0	0
ENSG00000087502	ERGIC2	57	21	53	36	75	110	13	36	43	48	55	51	73	39	63	61	57	24
ENSG00000087510	TFAP2C	0	0	0	0	0	0	0	0	0	0	0	0	0	0	0	0	0	0
ENSG00000087586	AURKA	2	5	4	5	13	11	4	0	3	115	10	28	6	33	12	40	41	2
ENSG00000087589	CASS4	7	0	0	1	6	2	0	6	4	1	6	0	0	7	1	3	0	3
ENSG00000087842	PIR	0	0	0	0	5	0	0	0	0	0	0	2	0	0	0	3	0	0
ENSG00000087884	AAMDC	1	15	10	5	22	8	6	13	4	33	51	61	27	55	20	46	59	15
ENSG00000087903	RFX2	9	21	14	9	31	22	8	24	22	4	13	20	21	32	8	28	96	8
ENSG00000087995	METTL2A	6	5	13	8	12	11	2	5	10	8	7	14	8	1	7	4	6	7
ENSG00000088002	SULT2B1	0	0	0	0	0	0	0	0	0	0	0	0	0	0	0	0	0	0
ENSG00000088035	ALG6	19	30	18	18	52	38	6	17	7	59	10	14	15	13	7	9	23	2
ENSG00000088038	CNOT3	24	30	13	16	48	27	22	25	23	29	32	20	19	23	22	40	29	7
ENSG00000088053	GP6	6	1	3	0	11	0	2	1	0	0	3	2	0	0	0	2	1	0
ENSG00000088179	PTPN4	75	42	64	35	64	61	43	53	26	32	37	21	43	20	27	24	24	14
ENSG00000088205	DDX18	265	440	458	338	648	438	180	408	438	208	285	377	358	249	452	265	484	137
ENSG00000088247	KHSRP	908	1053	1165	994	1611	1189	528	1808	1367	670	2072	1547	832	744	1133	1095	1752	403
ENSG00000088256	GNA11	29	40	27	25	74	40	45	51	35	50	43	135	39	23	96	55	86	33
ENSG00000088280	ASAP3	0	2	3	2	2	3	0	1	1	0	3	10	7	0	5	0	1	2
ENSG00000088298	EDEM2	4	10	13	17	18	8	2	15	8	20	2	5	9	4	8	7	11	2
ENSG00000088305	DNMT3B	1	0	1	0	5	1	2	0	0	26	4	10	146	11	5	19	19	3
ENSG00000088320	REM1	0	0	0	0	0	0	0	0	0	0	0	0	0	0	0	0	0	0
ENSG00000088325	TPX2	0	0	4	3	9	4	4	3	0	171	67	95	29	122	112	171	230	14
ENSG00000088356	PDRG1	44	74	53	47	121	54	44	69	67	68	76	37	24	33	114	31	91	32
ENSG00000088367	EPB41L1	1	1	0	0	0	0	2	0	0	2	0	1	0	0	25	1	0	0
ENSG00000088386	SLC15A1	0	0	0	0	0	0	0	0	0	0	0	0	0	0	0	0	0	0
ENSG00000088387	DOCK9	3	2	3	2	6	4	8	3	5	5	6	5	2	2	0	1	4	2
ENSG00000088448	ANKRD10	210	186	289	409	469	306	69	290	144	1145	678	258	292	260	734	394	369	164
ENSG00000088451	TGDS	4	0	2	1	7	4	2	1	3	4	2	3	3	0	1	2	0	2
ENSG00000088538	DOCK3	0	0	0	2	0	0	1	0	0	0	0	0	3	0	0	1	0	0
ENSG00000088543	C3orf18	0	5	11	3	12	3	1	5	2	2	0	4	7	4	0	0	3	1
ENSG00000088682	COQ9	10	32	20	24	55	21	9	50	17	50	5	22	24	32	4	19	31	10
ENSG00000088726	TMEM40	31	4	11	4	32	12	8	41	5	0	0	2	0	0	0	1	0	0
ENSG00000088727	KIF9	5	7	6	8	6	3	0	6	3	9	31	12	21	15	38	17	27	11
ENSG00000088756	ARHGAP28	0	0	0	0	0	0	0	0	0	0	0	0	0	0	0	0	0	0
ENSG00000088766	CRLS1	6	2	19	16	18	11	0	15	9	43	6	5	23	25	8	27	17	3
ENSG00000088782	DEFB127	0	0	0	0	0	0	0	0	0	0	0	0	0	0	0	0	0	0
ENSG00000088808	PPP1R13B	17	17	3	7	18	3	11	13	7	18	7	18	73	2	0	4	3	6
ENSG00000088812	ATRN	8	6	11	8	20	24	9	12	15	31	3	7	18	8	0	9	9	4
ENSG00000088826	SMOX	17	1	8	2	24	3	6	8	0	11	32	11	3	9	32	14	8	4
ENSG00000088827	SIGLEC1	1	0	2	1	2	0	0	0	0	0	0	0	1	367	0	7	5	0
ENSG00000088832	FKBP1A	283	517	424	380	950	469	227	626	627	1331	639	317	321	563	118	511	1232	152
ENSG00000088833	NSFL1C	109	202	113	79	305	198	98	155	245	136	224	109	96	105	105	138	168	45
ENSG00000088836	SLC4A11	0	3	2	1	1	0	6	3	0	2	5	0	1	4	0	2	0	0
ENSG00000088854	C20orf194	26	15	17	19	42	21	10	25	15	9	27	4	86	44	9	66	36	14
ENSG00000088876	ZNF343	12	11	10	7	31	17	1	23	11	7	6	5	4	4	2	9	18	7
ENSG00000088881	EBF4	0	0	0	0	0	0	0	0	0	75	2	2	1	0	1	0	0	0
ENSG00000088882	CPXM1	7	1	3	3	5	4	11	2	3	22	101	4	28	12	27	10	27	12
ENSG00000088888	MAVS	197	217	215	175	347	248	88	245	272	164	128	165	374	221	66	253	290	93
ENSG00000088899	LZTS3	31	9	8	0	12	7	46	6	9	0	23	2	21	0	6	1	7	5
ENSG00000088926	F11	0	0	0	0	0	0	0	0	0	0	0	0	0	0	0	0	0	0
ENSG00000088930	XRN2	378	305	421	278	397	499	148	357	302	228	799	216	536	284	322	266	485	253
ENSG00000088970	KIZ	31	28	31	57	56	56	17	42	22	44	22	26	38	16	7	27	60	13
ENSG00000088986	DYNLL1	28	95	121	92	365	96	21	130	77	408	26	204	63	223	79	200	220	34
ENSG00000088992	TESC	10	3	5	6	26	1	21	19	5	35	24	23	68	132	4	61	505	2
ENSG00000089006	SNX5	215	326	259	227	476	281	145	258	254	276	522	112	169	128	344	190	300	148
ENSG00000089009	RPL6	576	333	727	1156	942	720	80	678	938	886	1382	432	584	302	2281	423	741	530
ENSG00000089012	SIRPG	1	2	7	1	12	2	1	5	5	61	3	9	12	7	0	9	2	3
ENSG00000089022	MAPKAPK5	162	146	171	125	164	192	54	159	113	125	179	88	76	45	103	92	111	51
ENSG00000089041	P2RX7	28	22	11	16	21	22	14	11	36	1	15	8	19	29	8	5	12	11
ENSG00000089048	ESF1	151	176	258	189	314	234	76	237	100	27	200	71	179	80	145	118	169	96
ENSG00000089050	RBBP9	16	7	5	4	23	9	16	17	13	21	1	3	5	9	2	3	6	3
ENSG00000089053	ANAPC5	313	318	467	332	564	477	141	399	246	229	255	306	203	278	218	311	450	85
ENSG00000089057	SLC23A2	60	42	53	53	83	58	15	54	42	62	61	24	35	17	30	49	39	24
ENSG00000089060	SLC8B1	58	42	46	48	88	58	14	60	36	126	16	29	70	37	10	63	0	25
ENSG00000089063	TMEM230	14	11	33	66	78	37	2	41	20	159	38	20	37	51	8	41	49	15
ENSG00000089091	DZANK1	11	7	12	5	5	14	3	12	9	4	10	1	5	2	6	3	4	3
ENSG00000089094	KDM2B	129	191	207	199	394	230	233	163	205	227	335	168	173	188	166	100	261	57
ENSG00000089101	CFAP61	0	0	0	0	0	0	0	0	0	0	0	0	0	0	1	0	0	0
ENSG00000089116	LHX5	0	0	0	0	0	0	0	0	0	0	0	0	0	0	0	0	0	0
ENSG00000089123	TASP1	13	11	24	17	29	35	3	15	4	18	10	7	28	9	5	6	19	11
ENSG00000089127	OAS1	36	71	60	65	212	106	16	76	71	37	1	21	36	393	127	26	32	3
ENSG00000089154	GCN1	79	120	118	101	190	134	63	106	126	203	142	106	114	96	60	98	188	52
ENSG00000089157	RPLP0	2549	3290	3908	4493	5686	3550	1286	4937	6534	2592	5499	2892	2589	1645	7254	2437	7438	2487
ENSG00000089159	PXN	27	29	31	32	72	39	6	65	35	166	36	54	22	99	6	98	47	23
ENSG00000089163	SIRT4	0	0	0	0	1	1	0	2	0	4	0	0	2	1	0	0	0	0
ENSG00000089169	RPH3A	3	0	0	0	4	0	0	3	12	0	0	0	0	2	1	2	0	4
ENSG00000089177	KIF16B	48	23	35	31	59	31	16	31	30	4	124	33	102	28	49	114	78	52
ENSG00000089195	TRMT6	29	35	39	59	94	60	5	64	26	16	39	30	47	26	8	34	54	24
ENSG00000089199	CHGB	0	0	0	0	0	0	0	0	0	0	0	0	0	0	0	0	0	0
ENSG00000089220	PEBP1	600	619	688	621	998	704	256	542	722	1100	2717	1722	1132	1440	604	1859	1898	664
ENSG00000089225	TBX5	0	0	0	0	0	0	0	0	0	0	0	0	1	0	0	0	0	1
ENSG00000089234	BRAP	45	66	47	17	72	51	21	32	36	46	143	30	37	34	108	40	70	19
ENSG00000089248	ERP29	631	1282	1194	921	1759	1166	613	1013	1237	603	600	513	388	756	537	451	581	180
ENSG00000089250	NOS1	1	0	2	1	2	0	0	0	1	0	0	0	0	0	0	0	0	0
ENSG00000089280	FUS	1106	806	772	699	1251	1013	360	825	710	958	1080	598	638	645	1127	550	1178	276
ENSG00000089289	IGBP1	145	209	223	213	369	198	113	230	326	210	443	223	157	165	140	215	300	195
ENSG00000089327	FXYD5	396	307	315	293	978	426	406	376	495	230	501	249	256	617	374	430	721	173
ENSG00000089335	ZNF302	18	35	45	28	70	34	9	41	9	76	23	30	20	26	7	44	28	6
ENSG00000089351	GRAMD1A	138	182	176	131	329	191	162	219	141	322	243	219	268	170	219	290	303	83
ENSG00000089356	FXYD3	0	0	0	0	0	0	0	0	0	0	0	0	2	0	0	1	0	0
ENSG00000089472	HEPH	0	0	0	0	0	0	0	0	1	0	0	1	0	0	0	1	0	0
ENSG00000089486	CDIP1	48	82	105	50	138	85	48	84	60	82	51	41	69	63	19	59	20	12
ENSG00000089505	CMTM1	0	0	0	0	0	2	0	0	0	0	0	1	0	0	0	0	2	0
ENSG00000089558	KCNH4	0	0	0	4	0	0	0	4	3	0	0	0	0	0	0	0	0	0
ENSG00000089597	GANAB	156	234	232	266	514	283	60	359	307	538	267	384	323	283	56	443	488	100
ENSG00000089639	GMIP	70	137	167	132	364	180	53	162	204	42	58	47	67	131	18	67	132	24
ENSG00000089682	RBM41	95	62	72	66	121	149	19	72	56	7	71	100	76	24	10	32	42	63
ENSG00000089685	BIRC5	2	0	1	2	1	3	0	5	0	129	167	123	10	39	39	72	128	23
ENSG00000089692	LAG3	0	0	0	0	0	0	2	0	1	1	2	1	3	10	1	7	0	1
ENSG00000089693	MLF2	109	253	219	182	362	168	107	290	198	273	353	217	127	265	318	324	390	72
ENSG00000089723	OTUB2	0	0	0	0	0	3	0	0	0	0	0	0	0	0	0	1	0	0
ENSG00000089737	DDX24	808	531	484	440	576	680	350	454	823	206	1009	567	672	138	1373	291	355	487
ENSG00000089775	ZBTB25	31	46	47	50	95	35	30	63	38	55	30	53	45	28	28	31	31	25
ENSG00000089818	NECAP1	31	29	48	36	48	45	28	57	16	46	58	18	22	23	71	27	43	7
ENSG00000089820	ARHGAP4	1794	3519	1947	1650	4758	2734	2654	2004	1902	881	1698	3106	1638	1818	569	1764	4676	718
ENSG00000089847	ANKRD24	2	0	1	2	2	0	0	2	0	0	1	0	0	0	0	0	0	0
ENSG00000089876	DHX32	4	5	6	8	7	7	0	9	10	4	4	1	0	0	2	1	1	0
ENSG00000089902	RCOR1	164	112	84	106	174	222	152	141	107	41	464	180	394	45	371	56	157	110
ENSG00000089916	GPATCH2L	254	206	187	155	385	311	162	273	204	94	340	278	330	143	276	196	210	220
ENSG00000090006	LTBP4	10	14	36	33	42	18	2	18	44	53	9	39	37	4	4	9	49	0
ENSG00000090013	BLVRB	24	31	69	27	115	18	16	38	64	290	72	216	33	129	27	195	57	9
ENSG00000090020	SLC9A1	12	19	16	21	36	22	14	15	32	43	25	22	24	11	56	27	37	5
ENSG00000090054	SPTLC1	5	7	6	7	14	6	1	7	20	7	21	7	5	0	10	2	8	6
ENSG00000090060	PAPOLA	360	269	299	384	588	427	116	396	426	395	408	358	394	172	274	175	300	182
ENSG00000090061	CCNK	106	58	96	79	108	106	55	66	87	68	132	113	77	51	153	65	107	48
ENSG00000090097	PCBP4	37	43	41	28	61	31	18	63	82	333	173	69	150	14	20	11	49	46
ENSG00000090104	RGS1	39	15	62	31	31	29	12	63	178	2	15	0	233	6	716	3	56	14
ENSG00000090238	YPEL3	620	994	695	469	1606	808	732	833	703	650	230	582	409	440	249	724	620	134
ENSG00000090263	MRPS33	52	66	66	59	141	60	33	71	91	62	45	66	40	98	24	103	144	26
ENSG00000090266	NDUFB2	123	181	208	271	341	255	109	271	260	225	268	227	118	329	61	171	397	77
ENSG00000090273	NUDC	44	95	97	68	180	113	22	85	91	121	144	111	70	93	62	100	195	51
ENSG00000090316	MAEA	59	132	108	92	230	114	106	98	82	148	74	140	67	146	100	120	162	25
ENSG00000090339	ICAM1	35	13	26	3	26	8	45	42	25	6	13	17	33	47	13	10	4	3
ENSG00000090372	STRN4	45	47	40	45	114	67	45	57	39	62	76	61	47	50	35	53	112	16
ENSG00000090376	IRAK3	40	38	17	8	48	14	34	20	43	304	114	133	57	120	28	455	14	140
ENSG00000090382	LYZ	333	32	186	113	860	108	17	351	350	272	109	146	6	2632	24	744	78	1
ENSG00000090402	SI	0	0	0	0	0	0	0	0	0	0	0	0	0	0	0	0	0	0
ENSG00000090432	MUL1	23	37	22	9	67	29	14	34	10	34	42	31	32	33	16	36	86	16
ENSG00000090447	TFAP4	6	18	24	23	49	25	1	25	23	43	1	26	10	20	2	16	44	3
ENSG00000090470	PDCD7	24	42	58	53	78	53	13	89	75	19	51	38	79	22	139	50	39	49
ENSG00000090487	SPG21	46	56	64	121	157	80	27	92	120	174	61	62	44	109	11	96	113	31
ENSG00000090512	FETUB	0	0	0	0	0	0	0	0	0	0	0	0	0	0	0	0	0	0
ENSG00000090520	DNAJB11	131	153	127	105	169	139	113	178	87	149	195	142	65	93	200	90	190	48
ENSG00000090530	P3H2	0	0	0	0	0	0	0	0	0	1	0	1	2	0	0	0	0	0
ENSG00000090534	THPO	0	0	0	0	0	0	0	0	0	0	0	0	0	0	0	0	0	0
ENSG00000090539	CHRD	0	0	0	0	0	0	0	0	0	1	0	1	0	0	0	0	0	0
ENSG00000090554	FLT3LG	1	1	1	6	6	11	3	3	9	2	1	2	13	4	0	0	2	4
ENSG00000090565	RAB11FIP3	45	47	47	39	63	59	36	40	28	29	36	50	42	28	12	25	21	8
ENSG00000090581	GNPTG	42	40	46	58	77	42	27	64	39	90	96	82	61	49	11	38	48	12
ENSG00000090612	ZNF268	11	10	33	13	38	22	12	27	12	42	28	24	14	22	42	17	19	12
ENSG00000090615	GOLGA3	152	127	142	228	285	207	43	177	194	544	111	153	219	126	106	108	144	82
ENSG00000090621	PABPC4	456	323	406	334	413	434	175	447	696	160	454	269	482	163	1056	199	375	171
ENSG00000090659	CD209	0	0	0	0	0	0	0	0	0	0	0	0	0	1	0	1	0	0
ENSG00000090661	CERS4	9	28	16	15	29	29	14	19	29	10	3	4	16	1	6	0	12	3
ENSG00000090674	MCOLN1	1	1	1	4	3	3	1	2	5	3	4	4	2	4	1	3	2	1
ENSG00000090686	USP48	431	560	576	415	555	710	334	609	453	367	536	496	711	471	339	488	658	244
ENSG00000090776	EFNB1	4	0	0	1	7	1	0	6	4	27	65	84	76	2	54	10	9	31
ENSG00000090857	PDPR	178	135	208	201	139	188	46	123	288	168	123	162	94	102	206	84	147	59
ENSG00000090861	AARS	46	141	66	45	221	82	46	73	53	156	40	145	53	118	25	112	153	10
ENSG00000090863	GLG1	456	342	377	322	539	458	148	357	454	207	428	256	278	184	123	194	472	208
ENSG00000090889	KIF4A	0	0	1	1	6	1	1	0	0	63	56	82	14	18	13	24	73	18
ENSG00000090905	TNRC6A	335	421	479	355	610	469	203	413	313	237	494	248	341	250	190	256	375	162
ENSG00000090924	PLEKHG2	68	90	81	58	153	72	89	97	48	184	85	64	124	43	73	56	137	39
ENSG00000090932	DLL3	0	2	4	2	3	0	2	1	3	5	0	3	5	1	0	0	0	0
ENSG00000090971	NAT14	10	14	17	12	34	15	11	12	16	32	12	14	18	19	5	20	13	5
ENSG00000090975	PITPNM2	134	148	136	100	196	105	120	102	104	44	35	12	51	5	7	10	3	11
ENSG00000090989	EXOC1	66	56	62	78	130	86	23	86	49	77	109	71	69	54	26	72	44	31
ENSG00000091009	RBM27	86	49	69	84	101	92	37	56	45	62	106	47	36	30	80	42	60	24
ENSG00000091010	POU4F3	0	0	0	0	0	0	0	0	0	0	0	0	0	0	0	0	0	0
ENSG00000091039	OSBPL8	365	211	293	289	403	347	161	342	159	51	740	227	127	133	335	97	261	218
ENSG00000091073	DTX2	30	64	53	39	75	59	31	56	44	43	10	38	38	59	12	34	79	13
ENSG00000091106	NLRC4	4	8	6	2	28	13	5	11	10	5	0	1	3	45	0	13	0	0
ENSG00000091127	PUS7	5	3	7	4	9	4	1	5	7	14	4	5	12	2	4	3	25	6
ENSG00000091128	LAMB4	2	0	0	0	0	5	0	0	0	3	0	0	0	0	1	1	0	0
ENSG00000091129	NRCAM	0	0	0	0	0	0	0	0	2	0	0	0	0	0	0	0	1	0
ENSG00000091136	LAMB1	2	0	0	0	0	0	0	0	0	0	0	0	0	0	3	0	0	0
ENSG00000091137	SLC26A4	0	0	1	0	0	0	1	0	0	0	0	0	0	0	0	0	0	0
ENSG00000091138	SLC26A3	0	0	0	0	0	0	0	0	0	0	0	0	0	0	0	0	0	0
ENSG00000091140	DLD	43	41	33	27	80	49	30	52	20	108	112	72	75	69	98	74	122	26
ENSG00000091157	WDR7	39	26	30	26	52	47	8	27	40	28	24	30	24	41	5	18	32	24
ENSG00000091164	TXNL1	45	80	64	70	132	79	35	63	69	58	113	87	72	77	134	67	129	43
ENSG00000091181	IL5RA	0	4	1	0	5	0	1	2	0	0	1	0	0	2	1	2	0	0
ENSG00000091262	ABCC6	0	0	0	0	2	0	0	0	1	0	0	0	0	0	0	2	0	0
ENSG00000091317	CMTM6	680	755	604	423	1070	710	1375	566	522	298	1218	683	495	915	364	524	1383	179
ENSG00000091409	ITGA6	26	6	9	8	28	4	5	13	11	93	38	39	913	40	1369	328	200	152
ENSG00000091428	RAPGEF4	0	1	1	1	0	0	0	2	0	5	0	1	1	0	0	2	0	0
ENSG00000091436	ZAK	56	93	107	58	96	68	48	74	92	66	186	140	40	49	63	138	147	40
ENSG00000091482	SMPX	0	0	0	0	0	0	0	0	0	0	0	0	0	0	0	0	0	0
ENSG00000091483	FH	20	2	19	28	43	18	1	21	13	76	31	33	16	20	13	32	46	11
ENSG00000091490	SEL1L3	522	473	513	666	785	563	161	277	496	133	159	53	192	36	1	47	126	16
ENSG00000091513	TF	0	1	0	1	0	0	1	0	0	2	1	4	4	1	0	4	4	0
ENSG00000091527	CDV3	435	335	348	334	538	549	146	408	614	453	1151	553	601	340	700	386	690	296
ENSG00000091536	MYO15A	1	1	0	1	2	0	1	6	2	3	0	0	5	1	3	0	1	0
ENSG00000091542	ALKBH5	114	95	105	119	180	134	54	138	152	204	95	121	58	84	122	85	85	48
ENSG00000091583	APOH	0	0	0	0	1	0	0	0	0	0	0	0	0	0	0	0	0	0
ENSG00000091592	NLRP1	206	171	226	214	309	249	98	180	264	142	193	132	105	81	181	66	232	137
ENSG00000091622	PITPNM3	0	0	3	1	0	0	0	0	4	5	1	0	0	0	0	0	2	0
ENSG00000091640	SPAG7	145	218	195	265	305	240	92	169	424	293	503	347	196	238	155	205	459	236
ENSG00000091651	ORC6	12	23	10	17	20	35	17	24	12	64	87	43	27	14	21	20	41	5
ENSG00000091656	ZFHX4	0	0	0	0	0	0	0	0	0	0	0	0	0	0	0	0	0	0
ENSG00000091664	SLC17A6	0	0	0	0	0	0	0	0	0	0	0	0	0	0	0	0	0	0
ENSG00000091704	CPA1	0	0	0	0	0	0	0	0	0	0	0	0	0	0	0	0	0	0
ENSG00000091732	ZC3HC1	6	19	9	13	28	11	4	32	17	67	33	13	17	20	19	19	31	11
ENSG00000091831	ESR1	0	0	0	0	3	0	0	2	0	0	0	1	18	2	0	3	0	0
ENSG00000091844	RGS17	1	0	0	0	0	0	0	1	0	1	0	0	0	0	0	0	0	0
ENSG00000091879	ANGPT2	4	3	1	4	5	13	3	2	0	0	7	0	0	3	168	4	0	2
ENSG00000091947	TMEM101	16	17	27	26	45	29	7	25	31	49	29	44	37	47	19	42	39	24
ENSG00000091972	CD200	33	24	42	30	58	31	5	53	67	156	105	40	16	31	0	63	22	31
ENSG00000091986	CCDC80	1	2	0	0	0	0	0	0	0	0	0	13	0	5	0	8	1	0
ENSG00000092009	CMA1	0	0	0	0	0	0	0	0	0	0	0	0	0	0	0	0	0	0
ENSG00000092010	PSME1	571	587	635	532	1108	690	377	601	1009	584	716	750	571	723	367	745	1126	368
ENSG00000092020	PPP2R3C	150	189	125	77	219	334	59	198	162	76	232	311	143	96	144	115	209	115
ENSG00000092036	HAUS4	11	23	21	10	40	29	15	37	20	71	35	42	19	28	29	33	72	16
ENSG00000092051	JPH4	1	0	0	0	0	0	0	0	0	0	0	8	0	1	0	9	4	2
ENSG00000092054	MYH7	0	0	0	0	0	0	0	0	0	0	0	0	0	0	0	0	2	0
ENSG00000092067	CEBPE	2	8	11	0	17	2	2	6	13	33	2	49	0	5	0	7	0	2
ENSG00000092068	SLC7A8	1	0	0	0	2	1	0	2	4	0	1	2	14	0	0	1	0	1
ENSG00000092094	OSGEP	104	89	118	118	182	126	50	127	112	85	115	123	82	46	73	64	99	77
ENSG00000092096	SLC22A17	0	0	0	1	6	2	3	0	0	4	0	3	1	0	0	0	0	0
ENSG00000092098	RNF31	0	0	0	0	1	2	0	1	0	0	0	0	0	0	1	2	0	0
ENSG00000092108	SCFD1	162	94	181	133	159	149	57	143	89	49	251	105	156	58	121	104	123	89
ENSG00000092140	G2E3	64	95	64	68	125	114	33	90	28	42	91	81	43	20	102	55	70	45
ENSG00000092148	HECTD1	439	261	234	219	456	484	152	334	322	121	515	289	343	121	253	172	353	223
ENSG00000092199	HNRNPC	403	444	417	392	796	571	183	566	1016	687	1093	621	577	296	1766	441	869	471
ENSG00000092200	RPGRIP1	1	2	0	0	0	2	0	2	0	0	2	1	0	5	0	0	0	1
ENSG00000092201	SUPT16H	235	244	237	148	326	405	113	203	378	214	768	440	343	119	201	179	406	369
ENSG00000092203	TOX4	95	152	161	102	280	161	68	224	191	152	210	258	206	223	202	197	231	106
ENSG00000092208	GEMIN2	2	5	4	6	7	2	2	1	0	5	1	1	3	2	2	1	2	0
ENSG00000092295	TGM1	1	3	2	3	4	4	2	2	3	0	3	0	0	11	0	1	1	0
ENSG00000092330	TINF2	29	77	103	58	145	98	21	110	50	127	65	81	45	86	51	67	101	48
ENSG00000092345	DAZL	2	1	1	4	2	2	2	1	0	0	0	0	0	0	0	0	0	0
ENSG00000092377	TBL1Y	0	0	0	0	0	0	0	0	0	3	0	0	0	0	0	102	0	0
ENSG00000092421	SEMA6A	0	0	1	0	0	0	4	0	2	218	581	3	1	98	1787	758	12	165
ENSG00000092439	TRPM7	161	124	175	208	250	256	68	217	143	237	267	161	143	81	131	134	190	111
ENSG00000092445	TYRO3	0	0	0	0	1	0	0	1	0	5	4	4	15	1	10	1	0	8
ENSG00000092470	WDR76	5	3	4	4	16	12	6	17	15	93	107	110	22	27	22	41	72	33
ENSG00000092529	CAPN3	148	203	217	146	324	191	141	158	88	128	43	70	57	98	97	52	120	16
ENSG00000092531	SNAP23	80	72	67	99	185	88	24	72	66	120	35	42	76	61	41	129	89	27
ENSG00000092607	TBX15	0	0	0	0	0	0	0	0	0	0	0	0	2	0	0	0	2	0
ENSG00000092621	PHGDH	0	8	10	5	19	9	1	3	6	37	85	35	2	3	44	0	72	2
ENSG00000092758	COL9A3	3	11	6	11	9	4	1	17	4	5	3	0	0	1	0	0	0	0
ENSG00000092820	EZR	3099	1125	1032	936	1643	1360	2596	1595	2077	265	3253	615	1063	478	6810	360	1932	2075
ENSG00000092841	MYL6	800	818	892	950	1664	903	416	1094	1185	916	1398	848	699	1412	1748	775	1646	445
ENSG00000092847	2001-08-01	99	107	90	68	126	123	60	84	102	106	73	77	122	78	20	62	82	38
ENSG00000092850	TEKT2	0	0	0	0	0	0	0	0	0	0	0	0	0	0	0	0	0	0
ENSG00000092853	CLSPN	3	1	5	2	12	12	3	8	2	24	353	100	35	34	43	27	94	41
ENSG00000092871	RFFL	40	26	37	24	46	36	13	37	46	23	51	32	31	27	3	24	23	31
ENSG00000092929	UNC13D	177	112	150	121	193	181	34	149	183	254	51	75	169	81	56	97	381	63
ENSG00000092931	MFSD11	45	68	59	48	58	69	31	43	56	31	52	107	54	59	107	55	52	34
ENSG00000092964	DPYSL2	36	64	71	24	128	52	39	39	52	258	156	338	158	386	13	235	539	61
ENSG00000092969	TGFB2	2	1	0	0	1	0	1	1	2	2	0	0	0	2	17	1	0	0
ENSG00000092978	GPATCH2	65	105	93	81	175	134	42	123	73	18	98	82	105	56	11	83	133	54
ENSG00000093000	NUP50	70	89	139	109	245	124	31	118	79	147	156	122	53	87	157	101	137	28
ENSG00000093009	CDC45	0	1	0	0	3	1	2	2	0	87	28	35	6	10	11	14	21	7
ENSG00000093010	COMT	28	37	46	78	136	56	14	56	47	287	112	230	117	130	40	198	140	27
ENSG00000093072	CECR1	88	111	129	132	255	190	72	168	139	89	37	95	21	541	9	105	59	3
ENSG00000093134	VNN3	9	2	4	2	5	2	0	8	10	0	0	0	0	1	0	2	0	0
ENSG00000093144	ECHDC1	54	92	109	101	204	105	40	97	36	83	52	94	45	101	32	54	103	36
ENSG00000093167	LRRFIP2	45	28	49	36	70	48	15	48	51	38	106	32	55	34	67	52	97	40
ENSG00000093183	SEC22C	48	59	60	56	105	102	26	73	55	70	167	61	62	54	62	47	104	32
ENSG00000093217	XYLB	0	1	0	0	1	0	0	0	6	1	3	3	0	1	0	4	3	2
ENSG00000094631	HDAC6	116	152	150	102	262	195	110	114	111	145	197	225	173	152	25	110	150	89
ENSG00000094661	OR1I1	0	0	0	0	0	0	0	0	0	0	0	0	0	0	0	0	0	0
ENSG00000094755	GABRP	0	0	0	0	0	0	0	0	0	0	0	0	0	0	0	0	0	0
ENSG00000094796	KRT31	0	0	0	0	0	0	0	0	0	0	0	0	0	0	0	0	0	0
ENSG00000094804	CDC6	3	3	3	2	5	1	3	0	0	49	39	49	7	15	33	19	50	8
ENSG00000094841	UPRT	3	13	9	2	16	8	3	14	5	13	50	32	12	10	3	15	22	8
ENSG00000094880	CDC23	7	9	10	14	20	11	0	9	7	35	13	29	8	13	18	20	27	8
ENSG00000094914	AAAS	52	64	70	48	105	76	31	42	84	166	28	59	44	94	12	61	62	12
ENSG00000094916	CBX5	148	131	195	86	277	222	68	132	219	286	457	356	193	189	123	227	375	140
ENSG00000094963	FMO2	0	0	0	0	0	0	0	0	0	0	0	0	0	0	0	1	0	0
[truncated: 31,695 more rows]
